# Supplementary material for: A draft genome sequence of the rose black spot fungus Diplocarpon rosae reveals a high degree of genome duplication
Source: PLoS One. 2017 Oct 5;12(10):e0185310. doi: 10.1371/journal.pone.0185310 (PMC5628827; doi:10.1371/journal.pone.0185310)
Supplement: S6 File — (XLSX) [file pone.0185310.s006.xlsx]

## Sheet: Overview
	Glycoside Hydrolase Family			Carbohydrate Esterase Family			GlycosylTransferase Family			Auxiliary Activity Family			Polysaccharide Lyase Family			Carbohydrate-Binding Module Family
	Subject	Count		Subject	Count		Subject	Count		Subject	Count		Subject	Count		Subject	Count
	GH1	4		CE1	26		GT1	9		AA1	1		PL1	16		CBM1	5
	GH2	3		CE2	2		GT2	24		AA2	15		PL3	8		CBM16	1
	GH3	13		CE3	13		GT3	2		AA3	24		PL4	8		CBM18	7
	GH5	20		CE4	8		GT4	13		AA4	4			32		CBM20	4
	GH7	2		CE5	14		GT8	15		AA5	6					CBM21	2
	GH10	2		CE7	1		GT15	7		AA6	2					CBM34	1
	GH12	3		CE8	2		GT20	5		AA7	24					CBM35	1
	GH13	7		CE10	48		GT21	4		AA8	9					CBM42	2
	GH15	4		CE12	5		GT22	8		AA9	13					CBM43	3
	GH16	20		CE14	2		GT24	2		AA11	6					CBM48	1
	GH17	10		CE16	8		GT25	2								CBM50	7
	GH18	13					GT28	4								CBM63	2
	GH20	5					GT31	11								CBM67	2
	GH23	1					GT32	12
	GH27	4					GT33	2
	GH28	9					GT34	3
	GH30	2					GT35	2
	GH31	9					GT39	4
	GH32	2					GT41	2
	GH35	2					GT48	2
	GH37	1					GT50	2
	GH38	2					GT57	2
	GH43	6					GT58	2
	GH45	2					GT59	2
	GH47	14					GT62	6
	GH51	4					GT65	1
	GH53	4					GT66	2
	GH54	2					GT69	4
	GH55	2					GT71	4
	GH63	4					GT76	2
	GH64	4					GT90	8
	GH65	3
	GH71	2
	GH72	15
	GH74	4
	GH75	1
	GH76	22
	GH78	9
	GH92	4
	GH93	4
	GH105	3
	GH109	9
	GH114	4
	GH125	5
	GH128	6
	GH131	4
	GH132	3
	GH133	2
	GH135	5

## Sheet: GH
			Subject			Query			Subject	count
Query	Subject	E-value	Start	End	Covered fraction	Start	End		GH1	4
DR_000396-RA	GH1	7.8e-155	4	423	0.97669	2	468		GH2	3
DR_002551-RA	GH1	6.6e-155	4	423	0.97669	2	468		GH3	13
DR_005942-RA	GH1	5.8e-112	4	427	0.986014	49	527		GH5	20
DR_009044-RA	GH1	3.1e-111	4	427	0.986014	114	592		GH7	2
DR_010721-RA	GH10	4.6e-103	7	301	0.970297	24	333		GH10	2
DR_013577-RA	GH10	3.1e-93	7	302	0.973597	24	347		GH12	3
DR_000451-RA	GH105	7.4e-111	8	332	0.975904	47	368		GH13	7
DR_001747-RA	GH105	7.9e-103	7	332	0.978916	62	408		GH15	4
DR_012104-RA	GH105	1e-98	13	332	0.960843	68	408		GH16	20
DR_000236-RA	GH109	6.7e-09	52	123	0.563492	39	106		GH17	10
DR_000978-RA	GH109	1.8e-11	25	122	0.769841	40	131		GH18	13
DR_001795-RA	GH109	8.5e-12	1	120	0.944444	4	120		GH20	5
DR_006379-RA	GH109	2.3e-08	51	123	0.571429	38	106		GH23	1
DR_007177-RA	GH109	2.4e-14	2	124	0.968254	925	1049		GH27	4
DR_010106-RA	GH109	4.3e-07	15	118	0.81746	18	116		GH28	9
DR_010949-RA	GH109	1.7e-06	52	117	0.515873	47	115		GH30	2
DR_011765-RA	GH109	6.9e-10	17	119	0.809524	11	107		GH31	9
DR_013206-RA	GH109	1.4e-10	2	110	0.857143	3	110		GH32	2
DR_004036-RA	GH114	6.1e-73	1	190	0.994737	176	366		GH35	2
DR_010445-RA	GH114	2.9e-79	1	190	0.994737	101	291		GH37	1
DR_010497-RA	GH114	7.4e-79	1	190	0.994737	101	291		GH38	2
DR_013687-RA	GH114	1.7e-74	1	190	0.994737	167	357		GH43	6
DR_003880-RA	GH12	5.4e-29	40	156	0.74359	177	292		GH45	2
DR_006177-RA	GH12	7.2e-23	21	155	0.858974	239	377		GH47	14
DR_007354-RA	GH12	1.6e-29	41	156	0.737179	177	291		GH51	4
DR_001639-RA	GH125	7.6e-163	1	401	0.995025	150	617		GH53	4
DR_002206-RA	GH125	2.1e-163	1	401	0.995025	150	617		GH54	2
DR_007306-RA	GH125	4.7e-162	1	402	0.997512	86	520		GH55	2
DR_007427-RA	GH125	1.4e-94	76	333	0.639303	131	404		GH63	4
DR_012434-RA	GH125	1.2e-160	2	402	0.995025	87	520		GH64	4
DR_003551-RA	GH128	0.00029	126	204	0.348214	147	225		GH65	3
DR_003599-RA	GH128	2.5e-62	4	224	0.982143	69	287		GH71	2
DR_004154-RA	GH128	5.5e-63	5	224	0.977679	48	274		GH72	15
DR_005079-RA	GH128	1.7e-64	4	224	0.982143	193	403		GH74	4
DR_007531-RA	GH128	0.00054	126	204	0.348214	254	332		GH75	1
DR_008402-RA	GH128	9.5e-26	4	94	0.401786	22	117		GH76	22
DR_002919-RA	GH13	8.6e-74	12	292	0.936455	34	394		GH78	9
DR_003051-RA	GH13	2.4e-73	12	292	0.936455	34	394		GH92	4
DR_004056-RA	GH13	1.8e-74	7	292	0.953177	25	389		GH93	4
DR_005454-RA	GH13	2.7e-24	21	255	0.782609	221	487		GH105	3
DR_005497-RA	GH13	1.6e-43	19	293	0.916388	34	385		GH109	9
DR_007759-RA	GH13	3.9e-75	7	293	0.956522	25	390		GH114	4
DR_010798-RA	GH13	1.4e-43	19	293	0.916388	34	385		GH125	5
DR_001820-RA	GH131	3.2e-97	1	254	0.992157	19	258		GH128	6
DR_004292-RA	GH131	9.8e-99	1	254	0.992157	19	258		GH131	4
DR_012832-RA	GH131	4.2e-70	3	250	0.968627	26	287		GH132	3
DR_013584-RA	GH131	1.2e-70	3	250	0.968627	27	288		GH133	2
DR_001852-RA	GH132	1.2e-86	33	302	0.887789	44	322		GH135	5
DR_003267-RA	GH132	2.8e-88	11	303	0.963696	136	444			285
DR_010040-RA	GH132	8.7e-90	9	303	0.970297	138	448
DR_003246-RA	GH133	3.2e-155	5	371	0.983871	1012	1473
DR_011949-RA	GH133	5.9e-155	6	371	0.981183	1075	1532
DR_002988-RA	GH135	1.1e-58	21	191	0.7173	28	198
DR_004376-RA	GH135	1.3e-14	19	94	0.316456	42	116
DR_004377-RA	GH135	6.8e-82	1	236	0.991561	49	285
DR_004784-RA	GH135	7.1e-61	1	189	0.793249	43	223
DR_006146-RA	GH135	6.4e-36	89	236	0.620253	50	198
DR_003471-RA	GH15	3.8e-74	18	360	0.947368	83	481
DR_007876-RA	GH15	1.3e-77	2	360	0.99169	287	666
DR_010893-RA	GH15	1.2e-76	2	360	0.99169	287	666
DR_011841-RA	GH15	2.1e-73	15	360	0.955679	80	481
DR_001213-RA	GH16	1.7e-19	24	189	0.873016	98	308
DR_003354-RA	GH16	1.2e-23	54	185	0.693122	122	265
DR_003649-RA	GH16	1.1e-23	10	188	0.941799	92	309
DR_003709-RA	GH16	2.5e-23	21	189	0.888889	55	325
DR_003723-RA	GH16	3.4e-22	25	189	0.867725	139	329
DR_004087-RA	GH16	1.3e-22	55	188	0.703704	80	239
DR_004727-RA	GH16	1.9e-37	3	189	0.984127	135	461
DR_005107-RA	GH16	2.3e-24	20	189	0.89418	62	316
DR_006082-RA	GH16	6.3e-24	54	185	0.693122	122	265
DR_007038-RA	GH16	5.6e-21	54	186	0.698413	158	322
DR_007233-RA	GH16	1.4e-18	4	189	0.978836	290	621
DR_008766-RA	GH16	2.4e-18	4	189	0.978836	250	581
DR_009254-RA	GH16	7.5e-24	21	189	0.888889	55	325
DR_010336-RA	GH16	4.7e-29	18	176	0.835979	72	287
DR_011375-RA	GH16	1.3e-29	18	176	0.835979	72	288
DR_011701-RA	GH16	5.3e-28	3	189	0.984127	135	383
DR_011780-RA	GH16	2.8e-06	23	176	0.809524	527	724
DR_012519-RA	GH16	1.8e-23	10	188	0.941799	92	309
DR_012541-RA	GH16	1.6e-23	55	188	0.703704	80	239
DR_012618-RA	GH16	9.4e-21	54	186	0.698413	159	323
DR_000022-RA	GH17	1.9e-18	37	301	0.848875	71	302
DR_002689-RA	GH17	4.7e-16	14	298	0.913183	179	412
DR_004653-RA	GH17	7.7e-19	37	299	0.842444	71	300
DR_005571-RA	GH17	1e-08	13	180	0.536977	429	577
DR_006778-RA	GH17	1.3e-14	14	298	0.913183	259	492
DR_009964-RA	GH17	2.2e-20	10	298	0.926045	130	374
DR_010309-RA	GH17	2.5e-16	8	288	0.900322	177	411
DR_012385-RA	GH17	1.5e-15	67	298	0.742765	99	297
DR_013275-RA	GH17	8.1e-31	13	306	0.942122	432	694
DR_013967-RA	GH17	1.2e-16	68	281	0.684887	100	284
DR_002322-RA	GH18	2.6e-19	4	166	0.547297	32	204
DR_004328-RA	GH18	1.4e-69	4	288	0.959459	48	406
DR_005336-RA	GH18	2e-20	4	198	0.655405	11	231
DR_006687-RA	GH18	6e-59	3	281	0.939189	38	377
DR_006887-RA	GH18	7e-67	3	288	0.962838	46	405
DR_008209-RA	GH18	1.9e-64	3	281	0.939189	38	322
DR_009995-RA	GH18	1.2e-77	3	284	0.949324	7	357
DR_010276-RA	GH18	1.7e-82	3	285	0.952703	7	358
DR_011171-RA	GH18	1.9e-16	3	233	0.777027	31	343
DR_011664-RA	GH18	2.5e-53	6	288	0.952703	21	364
DR_012255-RA	GH18	9e-48	8	282	0.925676	25	414
DR_013385-RA	GH18	5.2e-49	23	282	0.875	32	414
DR_013677-RA	GH18	3.5e-19	4	198	0.655405	11	231
DR_003196-RA	GH2	2.1e-90	27	543	0.68617	4	692
DR_012328-RA	GH2	2.2e-90	27	533	0.672872	4	725
DR_012335-RA	GH2	1.3e-217	23	751	0.968085	46	913
DR_001481-RA	GH20	2.2e-94	6	336	0.979228	175	550
DR_002033-RA	GH20	1.1e-82	7	336	0.976261	208	553
DR_008545-RA	GH20	2.5e-41	6	120	0.338279	186	300
DR_008545-RA	GH20	8.5e-23	213	336	0.364985	353	490
DR_009099-RA	GH20	2e-93	6	336	0.979228	175	554
DR_005739-RA	GH23	1.7e-07	14	119	0.777778	235	349
DR_005065-RA	GH27	1.8e-48	35	235	0.533333	28	254
DR_008919-RA	GH27	5.7e-114	27	368	0.909333	22	355
DR_012166-RA	GH27	1.8e-26	255	374	0.317333	224	339
DR_012315-RA	GH27	9.7e-81	27	299	0.725333	22	279
DR_001318-RA	GH28	6.7e-28	9	198	0.581538	63	247
DR_002979-RA	GH28	6.8e-68	6	307	0.926154	29	363
DR_004387-RA	GH28	2.2e-67	18	307	0.889231	40	363
DR_007259-RA	GH28	2.3e-69	4	312	0.947692	44	363
DR_007688-RA	GH28	3.7e-72	3	317	0.966154	67	389
DR_007713-RA	GH28	1.9e-69	4	311	0.944615	44	362
DR_008237-RA	GH28	3.3e-46	8	321	0.963077	64	371
DR_010066-RA	GH28	1.3e-74	9	318	0.950769	73	417
DR_011050-RA	GH28	1.5e-74	9	319	0.953846	73	418
DR_000323-RA	GH3	3.6e-61	3	216	0.986111	90	311
DR_000797-RA	GH3	2.2e-62	7	216	0.967593	175	387
DR_004243-RA	GH3	9.7e-60	10	215	0.949074	76	305
DR_006356-RA	GH3	1.9e-57	10	215	0.949074	76	305
DR_006952-RA	GH3	5.4e-62	7	216	0.967593	176	388
DR_007272-RA	GH3	2.6e-63	4	216	0.981481	34	246
DR_007698-RA	GH3	4.5e-63	3	216	0.986111	33	246
DR_008024-RA	GH3	9.2e-37	4	212	0.962963	77	289
DR_008600-RA	GH3	2.6e-55	3	215	0.981481	6	224
DR_011356-RA	GH3	2.1e-62	4	216	0.981481	86	305
DR_011902-RA	GH3	6.4e-29	4	212	0.962963	82	309
DR_012018-RA	GH3	2.4e-62	3	216	0.986111	85	305
DR_013889-RA	GH3	5.8e-45	28	215	0.865741	6	223
DR_004728-RA	GH30	1.6e-82	28	416	0.930456	1	420
DR_011702-RA	GH30	6.6e-75	28	416	0.930456	1	430
DR_000434-RA	GH31	3.5e-117	1	427	0.997658	257	698
DR_001262-RA	GH31	6.6e-151	2	427	0.995316	374	820
DR_005319-RA	GH31	2.2e-49	2	156	0.360656	374	532
DR_005319-RA	GH31	5.1e-84	202	427	0.526932	546	776
DR_005652-RA	GH31	2.1e-147	2	427	0.995316	312	867
DR_008943-RA	GH31	2.7e-116	1	427	0.997658	110	525
DR_009234-RA	GH31	4.9e-115	1	427	0.997658	257	698
DR_011569-RA	GH31	1.1e-145	2	427	0.995316	312	867
DR_013298-RA	GH31	5e-28	102	263	0.377049	172	316
DR_000001-RA	GH32	3.2e-77	1	285	0.969283	54	341
DR_004634-RA	GH32	6.5e-70	29	285	0.87372	37	308
DR_003527-RA	GH35	1.4e-92	1	303	0.983713	47	385
DR_005529-RA	GH35	3.5e-92	1	303	0.983713	35	373
DR_009546-RA	GH37	7e-141	4	473	0.955193	125	659
DR_002717-RA	GH38	1.3e-88	2	255	0.94052	287	544
DR_006582-RA	GH38	1.5e-87	2	255	0.94052	284	541
DR_003289-RA	GH43	4.2e-34	1	247	0.991935	22	321
DR_004578-RA	GH43	1.7e-13	20	226	0.830645	46	252
DR_006500-RA	GH43	3.3e-25	20	226	0.830645	45	304
DR_008825-RA	GH43	7.3e-21	12	226	0.862903	34	264
DR_010020-RA	GH43	7.6e-37	1	247	0.991935	22	321
DR_011397-RA	GH43	2.6e-50	8	248	0.967742	34	316
DR_007665-RA	GH45	1.6e-28	52	119	0.338384	7	76
DR_007665-RA	GH45	1.9e-34	118	197	0.39899	93	172
DR_000734-RA	GH47	7.5e-164	1	446	0.997758	191	683
DR_001932-RA	GH47	1.5e-164	1	446	0.997758	191	683
DR_005801-RA	GH47	6.9e-152	1	427	0.955157	106	578
DR_006176-RA	GH47	2.8e-164	2	446	0.995516	104	612
DR_006474-RA	GH47	1.2e-115	52	412	0.807175	49	456
DR_006705-RA	GH47	4e-141	1	445	0.995516	56	599
DR_008120-RA	GH47	6.6e-140	1	445	0.995516	56	600
DR_008737-RA	GH47	1.7e-108	105	445	0.762332	101	454
DR_009390-RA	GH47	7.2e-131	2	446	0.995516	49	519
DR_009996-RA	GH47	2.9e-172	2	446	0.995516	206	977
DR_010159-RA	GH47	2.8e-130	2	446	0.995516	49	519
DR_010275-RA	GH47	2.3e-172	2	446	0.995516	206	967
DR_012961-RA	GH47	8.6e-163	1	446	0.997758	106	597
DR_013773-RA	GH47	1.2e-153	1	445	0.995516	83	538
DR_001806-RA	GH5	7.5e-35	9	243	0.850909	60	348
DR_002586-RA	GH5	1e-31	8	232	0.814545	41	368
DR_002851-RA	GH5	5.7e-37	2	232	0.836364	34	364
DR_002929-RA	GH5	3.2e-31	4	231	0.825455	15	542
DR_003041-RA	GH5	1.2e-30	4	231	0.825455	15	542
DR_003157-RA	GH5	6.2e-50	28	275	0.898182	88	392
DR_003335-RA	GH5	4.1e-25	11	205	0.705455	293	545
DR_005924-RA	GH5	2.4e-36	2	231	0.832727	54	383
DR_006716-RA	GH5	5.5e-47	27	275	0.901818	82	383
DR_008131-RA	GH5	4.1e-28	27	127	0.363636	82	209
DR_008131-RA	GH5	3.2e-16	98	214	0.421818	241	384
DR_008619-RA	GH5	2e-34	17	241	0.814545	98	396
DR_009927-RA	GH5	7.9e-50	28	275	0.898182	88	392
DR_010429-RA	GH5	1.1e-24	21	241	0.8	94	396
DR_010481-RA	GH5	3e-17	13	242	0.832727	86	359
DR_010672-RA	GH5	8.8e-33	9	251	0.88	81	377
DR_010737-RA	GH5	4.8e-25	6	158	0.552727	39	254
DR_011392-RA	GH5	1.1e-09	75	177	0.370909	19	151
DR_013609-RA	GH5	2.9e-31	11	275	0.96	301	641
DR_013792-RA	GH5	8.3e-34	17	238	0.803636	98	393
DR_007227-RA	GH51	1.5e-48	271	545	0.434921	154	446
DR_008760-RA	GH51	7.2e-124	85	545	0.730159	14	502
DR_009426-RA	GH51	1.9e-75	110	541	0.684127	257	715
DR_010122-RA	GH51	8.9e-76	110	541	0.684127	257	715
DR_000691-RA	GH53	7.4e-78	1	330	0.961988	13	343
DR_004541-RA	GH53	1.9e-77	1	330	0.961988	37	367
DR_004792-RA	GH53	4.4e-86	2	342	0.994152	21	345
DR_006154-RA	GH53	1.6e-87	2	342	0.994152	21	345
DR_001779-RA	GH54	1.9e-154	1	315	0.993671	27	342
DR_011749-RA	GH54	3e-112	69	315	0.778481	44	291
DR_000032-RA	GH55	0	7	739	0.989189	32	775
DR_004663-RA	GH55	0	7	739	0.989189	32	775
DR_004229-RA	GH63	1.6e-30	319	565	0.431579	900	1111
DR_008694-RA	GH63	2.5e-15	356	567	0.370175	456	910
DR_009347-RA	GH63	2.3e-15	356	567	0.370175	448	902
DR_011869-RA	GH63	7.9e-31	319	565	0.431579	587	798
DR_003205-RA	GH64	8.5e-113	5	367	0.986376	2	366
DR_006691-RA	GH64	1.8e-111	3	367	0.991826	12	382
DR_008213-RA	GH64	9.7e-62	98	298	0.544959	45	246
DR_012319-RA	GH64	9.7e-101	2	367	0.99455	48	398
DR_007582-RA	GH65	4.1e-31	3	157	0.413978	385	544
DR_007582-RA	GH65	8e-24	258	370	0.301075	590	721
DR_010374-RA	GH65	5e-48	3	242	0.642473	385	619
DR_005802-RA	GH7	3.3e-180	1	414	0.995181	19	447
DR_012962-RA	GH7	3e-168	1	382	0.918072	19	410
DR_011075-RA	GH71	2.9e-90	54	369	0.84	37	365
DR_012338-RA	GH71	1.3e-62	2	221	0.584	27	253
DR_003149-RA	GH72	3.5e-119	11	310	0.958333	28	333
DR_003402-RA	GH72	3.8e-115	4	310	0.980769	21	335
DR_004156-RA	GH72	5.5e-129	3	310	0.983974	33	331
DR_004168-RA	GH72	5.5e-108	3	311	0.987179	17	319
DR_004989-RA	GH72	4.6e-122	3	310	0.983974	33	332
DR_005667-RA	GH72	1.9e-107	3	307	0.974359	19	315
DR_006033-RA	GH72	4.6e-116	4	310	0.980769	19	333
DR_009967-RA	GH72	1.1e-128	3	286	0.907051	26	309
DR_010305-RA	GH72	1.3e-136	3	312	0.990385	26	334
DR_010916-RA	GH72	3.5e-110	3	291	0.923077	19	296
DR_011419-RA	GH72	1.8e-100	26	265	0.766026	1	234
DR_011430-RA	GH72	2.6e-107	3	311	0.987179	17	319
DR_011554-RA	GH72	4.6e-105	3	307	0.974359	19	315
DR_012499-RA	GH72	1.2e-122	4	310	0.980769	34	332
DR_013784-RA	GH72	2.7e-107	3	291	0.923077	19	299
DR_000878-RA	GH74	3.3e-09	39	131	0.39485	33	119
DR_000878-RA	GH74	8.4e-07	35	120	0.364807	409	486
DR_000878-RA	GH74	0.00052	34	106	0.309013	691	756
DR_001513-RA	GH74	5.8e-10	16	118	0.437768	256	379
DR_006196-RA	GH75	1.3e-69	5	218	0.968182	13	265
DR_000132-RA	GH76	9.2e-99	12	346	0.932961	30	394
DR_000801-RA	GH76	9e-110	12	355	0.958101	32	397
DR_003358-RA	GH76	3.5e-92	55	345	0.810056	1	338
DR_004172-RA	GH76	4.8e-106	9	346	0.941341	25	380
DR_004771-RA	GH76	5.9e-34	17	330	0.874302	38	382
DR_004878-RA	GH76	4.3e-55	64	339	0.768156	104	494
DR_005028-RA	GH76	6.3e-33	24	330	0.854749	42	381
DR_005369-RA	GH76	8.2e-42	32	287	0.712291	55	317
DR_006078-RA	GH76	7.1e-106	22	345	0.902235	2	349
DR_006947-RA	GH76	5.5e-109	12	356	0.960894	32	398
DR_008106-RA	GH76	1.1e-97	12	346	0.932961	30	394
DR_008142-RA	GH76	2.6e-54	67	339	0.759777	107	494
DR_008301-RA	GH76	4.3e-37	12	142	0.363128	50	194
DR_009295-RA	GH76	4.9e-91	14	355	0.952514	21	384
DR_011848-RA	GH76	1.1e-42	28	289	0.72905	51	319
DR_012201-RA	GH76	7.4e-112	9	346	0.941341	25	385
DR_012259-RA	GH76	2.3e-64	70	340	0.75419	47	331
DR_012381-RA	GH76	5.9e-95	10	314	0.849162	29	362
DR_012386-RA	GH76	1.9e-106	12	349	0.941341	33	401
DR_012429-RA	GH76	4e-72	13	340	0.913408	41	375
DR_013347-RA	GH76	1.8e-90	14	342	0.916201	21	384
DR_013779-RA	GH76	4e-99	9	312	0.846369	6	332
DR_002255-RA	GH78	6e-153	4	504	0.992063	331	888
DR_002606-RA	GH78	2.1e-85	5	504	0.990079	81	636
DR_006981-RA	GH78	2.7e-71	109	504	0.78373	96	535
DR_007188-RA	GH78	1.4e-78	5	503	0.988095	76	630
DR_007964-RA	GH78	1.4e-93	8	503	0.982143	103	665
DR_010379-RA	GH78	2.6e-59	133	503	0.734127	307	706
DR_010976-RA	GH78	1.7e-58	133	503	0.734127	307	706
DR_012470-RA	GH78	5.5e-151	4	504	0.992063	331	888
DR_013083-RA	GH78	1.5e-58	8	401	0.779762	103	560
DR_000791-RA	GH92	7.2e-158	4	490	0.989817	255	766
DR_005024-RA	GH92	6.5e-159	9	490	0.979633	245	748
DR_006959-RA	GH92	5.3e-158	4	490	0.989817	260	771
DR_011977-RA	GH92	8.5e-159	8	490	0.98167	226	730
DR_003290-RA	GH93	4e-99	1	306	0.993485	55	362
DR_005737-RA	GH93	1.9e-107	1	306	0.993485	42	353
DR_008486-RA	GH93	7.2e-109	1	306	0.993485	42	353
DR_010019-RA	GH93	4e-55	107	306	0.648208	58	259

## Sheet: PL
			Subject			Query
Query	Subject	E-value	Start	End	Covered fraction	Start	End		Subject	count
DR_000194-RA	PL3	2.2e-68	2	197	0.989848	49	242		PL1	16
DR_000448-RA	PL4	7.1e-103	4	559	0.978836	12	578		PL2	0
DR_000452-RA	PL4	1e-153	17	566	0.968254	39	653		PL3	8
DR_000574-RA	PL4	5.5e-99	4	567	0.992945	18	553		PL4	8
DR_001828-RA	PL4	3.5e-32	6	191	0.326279	18	186		PL5	0
DR_001828-RA	PL4	5.5e-73	284	567	0.499118	191	452		PL6	0
DR_002572-RA	PL1	7.9e-54	11	198	0.925743	73	265		PL7	0
DR_002797-RA	PL3	2.6e-63	20	197	0.898477	42	216		PL8	0
DR_004155-RA	PL1	2.6e-38	29	199	0.841584	73	239		PL9	0
DR_004286-RA	PL4	2.9e-133	5	567	0.991182	17	525		PL10	0
DR_004778-RA	PL1	1e-50	20	200	0.891089	115	301		PL11	0
DR_004828-RA	PL3	1.1e-65	9	197	0.954315	33	215		PL12	0
DR_004830-RA	PL1	9.8e-27	107	174	0.331683	149	220		PL13	0
DR_004981-RA	PL3	2.1e-29	100	197	0.492386	193	289		PL14	0
DR_005121-RA	PL4	1.1e-98	4	567	0.992945	18	539		PL15	0
DR_006109-RA	PL3	4.5e-28	87	174	0.441624	83	168		PL16	0
DR_006111-RA	PL1	7.1e-51	28	201	0.856436	101	277		PL17	0
DR_006141-RA	PL1	3.5e-50	20	200	0.891089	115	301		PL18	0
DR_007484-RA	PL1	1.7e-41	21	201	0.891089	159	377		PL19	0
DR_007678-RA	PL3	1.3e-63	20	197	0.898477	42	216		PL20	0
DR_008042-RA	PL1	1.7e-55	26	200	0.861386	87	266		PL21	0
DR_008050-RA	PL1	1.6e-20	19	108	0.440594	127	213		PL22	0
DR_009221-RA	PL4	5.5e-104	7	559	0.973545	18	581		PL23	0
DR_009424-RA	PL1	6.3e-43	20	201	0.89604	124	315		PL24	0
DR_009648-RA	PL1	7e-50	20	201	0.89604	118	306			32
DR_010124-RA	PL1	5.5e-45	17	201	0.910891	77	271
DR_010905-RA	PL1	4.2e-50	20	201	0.89604	118	306
DR_011418-RA	PL1	2.1e-54	23	199	0.871287	119	298
DR_011726-RA	PL1	3.6e-56	26	201	0.866337	76	256
DR_011736-RA	PL1	6.1e-39	20	200	0.891089	124	342
DR_012042-RA	PL3	2.6e-68	2	197	0.989848	63	256
DR_012888-RA	PL3	6.5e-62	6	197	0.969543	117	301

## Sheet: AA
			Subject			Query
Query	Subject	E-value	Start	End	Covered fraction	Start	End		Subject	count
DR_000168-RA	AA9	9.1e-71	5	219	0.972727	13	233		AA1	1
DR_000347-RA	AA3	5.3e-16	86	283	0.31877	220	485		AA2	15
DR_000449-RA	AA2	2e-14	19	114	0.372549	78	174		AA3	24
DR_000449-RA	AA2	6.6e-12	25	137	0.439216	479	597		AA4	4
DR_000455-RA	AA7	1.3e-45	9	224	0.469432	61	280		AA5	6
DR_000458-RA	AA5	5.1e-126	401	1024	0.486339	76	792		AA6	2
DR_000827-RA	AA3	4.7e-69	85	403	0.514563	11	576		AA7	24
DR_000828-RA	AA3	2.5e-84	83	403	0.517799	13	594		AA8	9
DR_000924-RA	AA3	8.8e-78	85	398	0.506472	25	636		AA9	13
DR_000944-RA	AA9	1.5e-63	5	219	0.972727	10	224		AA10	0
DR_000987-RA	AA7	3.3e-54	6	213	0.451965	63	269		AA11	6
DR_001097-RA	AA8	2e-274	10	784	0.949693	4	755		AA12	0
DR_001303-RA	AA7	1e-51	10	207	0.430131	87	288		AA13	0
DR_001396-RA	AA7	4.8e-48	14	214	0.436681	72	285			104
DR_001866-RA	AA2	2.5e-14	97	194	0.380392	98	197
DR_002083-RA	AA5	8.1e-122	554	1025	0.367681	137	627
DR_002292-RA	AA7	8.8e-47	14	214	0.436681	75	288
DR_002383-RA	AA2	3e-57	4	253	0.976471	10	265
DR_002501-RA	AA3	6e-23	86	285	0.322006	220	603
DR_002576-RA	AA11	2.7e-45	1	185	0.963351	21	213
DR_002806-RA	AA8	2.7e-253	219	812	0.727607	32	636
DR_002885-RA	AA3	3.5e-88	88	416	0.530744	5	653
DR_003097-RA	AA9	2.6e-54	2	218	0.981818	6	209
DR_003191-RA	AA9	1.1e-72	2	219	0.986364	8	221
DR_003207-RA	AA4	2.7e-22	4	192	0.360153	122	310
DR_003250-RA	AA2	8.3e-22	15	164	0.584314	69	216
DR_003581-RA	AA9	1.2e-28	32	152	0.545455	21	137
DR_003602-RA	AA7	3.1e-24	5	194	0.412664	36	218
DR_003885-RA	AA3	2.1e-84	89	400	0.503236	27	592
DR_004214-RA	AA3	6.8e-70	87	398	0.503236	46	560
DR_004426-RA	AA2	2.7e-61	5	254	0.976471	103	354
DR_004468-RA	AA6	8.9e-87	1	195	0.994872	4	199
DR_004569-RA	AA3	7.5e-85	87	401	0.508091	2	562
DR_004713-RA	AA3	1.5e-71	154	404	0.404531	1	454
DR_004715-RA	AA11	1e-71	1	188	0.979058	20	234
DR_004752-RA	AA9	5.5e-53	3	218	0.977273	7	209
DR_004884-RA	AA3	2e-72	93	372	0.451456	18	553
DR_004967-RA	AA7	2.3e-54	11	209	0.432314	137	347
DR_005087-RA	AA3	4.3e-78	87	401	0.508091	8	601
DR_005372-RA	AA3	6.5e-42	89	406	0.512945	234	758
DR_005430-RA	AA11	2.1e-35	1	123	0.638743	26	158
DR_005430-RA	AA11	1.2e-11	121	187	0.34555	191	265
DR_005496-RA	AA7	4.3e-73	5	240	0.5131	59	295
DR_005649-RA	AA8	2.3e-138	238	779	0.663804	21	557
DR_005805-RA	AA7	4.2e-52	3	203	0.436681	48	251
DR_005891-RA	AA3	1.8e-88	88	416	0.530744	5	652
DR_006275-RA	AA2	1.2e-61	5	254	0.976471	125	376
DR_006506-RA	AA3	4.3e-32	166	362	0.317152	26	356
DR_006921-RA	AA3	3.2e-44	196	407	0.341424	58	515
DR_007151-RA	AA8	1.2e-201	12	650	0.782822	18	646
DR_007345-RA	AA3	1e-77	78	402	0.524272	41	623
DR_007349-RA	AA3	8.8e-82	87	400	0.506472	25	651
DR_007472-RA	AA7	1.7e-74	6	455	0.980349	36	466
DR_007507-RA	AA9	1.5e-26	37	158	0.55	12	135
DR_007666-RA	AA8	5.9e-251	221	811	0.723926	34	635
DR_007683-RA	AA9	2.8e-43	6	213	0.940909	9	208
DR_007792-RA	AA8	1e-273	11	786	0.95092	5	759
DR_007819-RA	AA2	7.6e-23	18	161	0.560784	48	188
DR_007872-RA	AA9	1.8e-35	3	156	0.695455	8	157
DR_007967-RA	AA5	2.2e-145	556	1039	0.377049	302	826
DR_007989-RA	AA2	7.3e-16	17	116	0.388235	119	219
DR_007989-RA	AA2	3.9e-08	67	253	0.729412	595	812
DR_008069-RA	AA9	4.5e-64	41	219	0.809091	16	190
DR_008136-RA	AA3	6.5e-89	78	398	0.517799	27	603
DR_008223-RA	AA7	1.2e-50	11	453	0.965066	89	517
DR_008399-RA	AA7	3.6e-20	40	207	0.364629	46	208
DR_008419-RA	AA9	4e-67	2	218	0.981818	10	229
DR_008525-RA	AA3	6.1e-84	97	400	0.490291	10	566
DR_008593-RA	AA5	8.2e-114	555	1025	0.366901	135	617
DR_008846-RA	AA7	1e-47	24	209	0.40393	38	227
DR_008906-RA	AA7	4.9e-12	58	202	0.31441	131	274
DR_008975-RA	AA7	3.2e-69	6	236	0.502183	36	263
DR_009220-RA	AA2	2.3e-14	19	114	0.372549	78	174
DR_009220-RA	AA2	3.5e-16	25	253	0.894118	479	735
DR_009528-RA	AA7	1.7e-51	13	216	0.443231	73	279
DR_009819-RA	AA6	4.3e-58	7	133	0.646154	13	140
DR_010349-RA	AA3	4.6e-76	93	404	0.503236	3	486
DR_010729-RA	AA11	3.1e-45	1	185	0.963351	21	213
DR_010799-RA	AA7	2.2e-76	5	204	0.434498	58	261
DR_010889-RA	AA9	2.8e-63	32	217	0.840909	12	202
DR_011126-RA	AA5	5.5e-135	547	1024	0.372365	270	800
DR_011129-RA	AA7	2.6e-46	9	224	0.469432	62	281
DR_011177-RA	AA7	7.8e-37	57	218	0.351528	27	189
DR_011317-RA	AA7	4.5e-51	5	453	0.978166	67	506
DR_011465-RA	AA3	1.4e-91	87	398	0.503236	46	623
DR_011544-RA	AA4	3e-24	7	249	0.463602	139	375
DR_011572-RA	AA8	1.8e-140	237	779	0.665031	20	557
DR_011769-RA	AA2	4.5e-30	20	194	0.682353	65	238
DR_011846-RA	AA3	4.9e-45	86	404	0.514563	231	756
DR_011945-RA	AA2	1.3e-21	15	186	0.670588	69	251
DR_012118-RA	AA2	1.1e-56	4	253	0.976471	10	265
DR_012304-RA	AA7	2e-14	58	211	0.334061	131	283
DR_012317-RA	AA4	2.3e-22	8	192	0.35249	76	260
DR_012965-RA	AA7	4.1e-52	3	455	0.9869	48	497
DR_013051-RA	AA8	1.3e-124	125	495	0.453988	56	431
DR_013051-RA	AA8	7.6e-110	426	792	0.44908	434	787
DR_013228-RA	AA7	1.1e-52	5	227	0.484716	76	297
DR_013320-RA	AA4	2.9e-25	6	251	0.469349	113	352
DR_013406-RA	AA3	3.5e-80	83	404	0.519417	7	516
DR_013431-RA	AA9	5.6e-45	107	219	0.509091	43	153
DR_013443-RA	AA7	4.6e-49	19	188	0.368996	71	240
DR_013471-RA	AA5	1.4e-148	556	1037	0.375488	303	811
DR_013555-RA	AA1	1.2e-82	392	719	0.346766	24	383
DR_013722-RA	AA11	4.3e-72	1	188	0.979058	20	234

## Sheet: GT
			Subject			Query		Note
Query	Subject	E-value	Start	End	Covered fraction	Start	End		Subject	count
DR_000117-RA	GT2	7.8e-08	2	167	0.982143	145	345		GT1	9
DR_000165-RA	GT33	1.6e-150	3	423	0.988235	47	455		GT2	24
DR_000222-RA	GT22	7.5e-94	2	389	0.994859	26	452		GT3	2
DR_000404-RA	GT8	2.3e-13	89	254	0.642023	213	394		GT4	13
DR_000491-RA	GT31	1e-06	41	114	0.380208	153	227		GT5	0
DR_000543-RA	GT39	7.5e-70	2	223	0.991031	56	301		GT6	0
DR_000573-RA	GT2	2.9e-37	1	164	0.970238	114	311		GT7	0
DR_000804-RA	GT2	2.1e-07	79	167	0.52381	406	494		GT8	15
DR_000951-RA	GT2	2.8e-07	2	166	0.97619	392	627		GT9	0
DR_000975-RA	GT1	1.4e-59	8	376	0.963351	394	791		GT10	0
DR_000976-RA	GT39	1.8e-71	1	223	0.995516	65	310		GT11	0
DR_001005-RA	GT39	3.1e-72	2	223	0.991031	69	307		GT12	0
DR_001176-RA	GT76	4.4e-109	2	407	0.995086	16	439		GT13	0
DR_001269-RA	GT28	0.00044	61	141	0.509554	277	355		GT14	0
DR_001316-RA	GT32	1.3e-10	51	87	0.4	327	363		GT15	7
DR_001383-RA	GT3	9.9e-284	39	637	0.938776	22	620		GT16	0
DR_001602-RA	GT15	5.2e-53	131	272	0.516484	70	211		GT17	0
DR_001679-RA	GT4	3.2e-36	7	147	0.875	211	349		GT18	0
DR_001723-RA	GT90	1.8e-16	15	147	0.528	112	271		GT19	0
DR_001751-RA	GT15	1.3e-126	1	272	0.992674	114	421		GT20	5
DR_001870-RA	GT22	2e-93	2	389	0.994859	26	452		GT21	4
DR_001942-RA	GT21	6.5e-06	3	175	0.738197	105	285		GT22	8
DR_001961-RA	GT57	1.7e-177	2	479	0.991684	15	495		GT23	0
DR_002168-RA	GT15	5.1e-74	99	272	0.6337	1	174		GT24	2
DR_002279-RA	GT3	1e-306	1	637	0.99843	15	651		GT25	2
DR_002560-RA	GT8	1.2e-13	103	254	0.587549	213	394		GT26	0
DR_002624-RA	GT50	2.7e-96	1	262	0.996183	133	406		GT27	0
DR_002799-RA	GT4	2.6e-14	6	149	0.89375	2545	2695		GT28	4
DR_002819-RA	GT66	7.1e-193	10	600	0.851371	23	672		GT29	0
DR_002823-RA	GT69	5.1e-33	1	122	0.506276	54	196		GT30	0
DR_002926-RA	GT20	2e-192	38	474	0.917895	2	439		GT31	11
DR_002960-RA	GT24	7.5e-134	1	248	0.995968	1186	1433		GT32	12
DR_002968-RA	GT1	3.6e-33	66	353	0.751309	87	412		GT33	2
DR_002987-RA	GT4	2.4e-16	6	149	0.89375	2526	2676		GT34	3
DR_003002-RA	GT1	1.4e-32	69	354	0.746073	452	777		GT35	2
DR_003010-RA	GT24	7.9e-62	1	131	0.524194	1186	1316		GT36	0
DR_003044-RA	GT20	7.7e-200	11	474	0.974737	10	475		GT37	0
DR_003096-RA	GT31	1.6e-10	56	159	0.536458	158	247		GT38	0
DR_003138-RA	GT1	4.9e-61	77	369	0.764398	299	622		GT39	4
DR_003193-RA	GT2	1.2e-07	2	167	0.982143	53	220		GT40	0
DR_003232-RA	GT20	3.4e-90	32	289	0.541053	162	428		GT41	2
DR_003364-RA	GT4	2.2e-36	8	153	0.90625	222	392		GT42	0
DR_003627-RA	GT8	8.4e-20	41	167	0.490272	15	144		GT43	0
DR_003761-RA	GT76	5.7e-67	176	407	0.567568	105	340		GT44	0
DR_003805-RA	GT21	3e-06	3	176	0.742489	112	293		GT45	0
DR_003904-RA	GT62	1.7e-111	2	267	0.988806	99	364		GT46	0
DR_003912-RA	GT4	1.2e-11	12	117	0.65625	243	354		GT47	0
DR_004049-RA	GT32	1.5e-17	4	89	0.944444	123	207		GT48	2
DR_004108-RA	GT8	8e-10	96	254	0.614786	163	332		GT49	0
DR_004170-RA	GT90	3.5e-70	13	248	0.94	318	620		GT50	2
DR_004303-RA	GT35	2.8e-280	2	674	0.997033	161	876		GT51	0
DR_004353-RA	GT31	1.3e-07	60	165	0.546875	223	309		GT52	0
DR_004378-RA	GT4	5.1e-17	6	149	0.89375	2527	2677		GT53	0
DR_004399-RA	GT62	8.5e-38	5	132	0.473881	74	199		GT54	0
DR_004599-RA	GT31	1.1e-06	66	164	0.510417	215	301		GT55	0
DR_004718-RA	GT90	1.3e-21	19	246	0.908	207	432		GT56	0
DR_004729-RA	GT31	1.2e-05	75	159	0.4375	222	293		GT57	2
DR_004751-RA	GT31	3.2e-10	56	158	0.53125	158	246		GT58	2
DR_004871-RA	GT32	7.4e-06	3	80	0.855556	122	193		GT59	2
DR_004912-RA	GT90	2.9e-85	3	248	0.98	377	647		GT60	0
DR_004916-RA	GT22	1.1e-62	2	386	0.987147	6	406		GT61	0
DR_004983-RA	GT2	1.4e-07	1	166	0.982143	60	230		GT62	6
DR_005109-RA	GT34	1.8e-84	3	245	0.98374	165	426		GT63	0
DR_005122-RA	GT2	7.6e-37	1	164	0.970238	114	311		GT64	0
DR_005151-RA	GT39	6.9e-70	2	223	0.991031	55	300		GT65	1
DR_005327-RA	GT28	8.2e-05	61	142	0.515924	277	356		GT66	2
DR_005403-RA	GT8	8.6e-41	29	254	0.875486	77	338		GT67	0
DR_005411-RA	GT71	4.1e-39	1	202	0.761364	144	321		GT68	0
DR_005431-RA	GT2	4.3e-08	80	166	0.511905	276	363		GT69	4
DR_005506-RA	GT58	3.2e-144	2	364	0.994505	34	397		GT70	0
DR_005520-RA	GT2	1.8e-13	79	165	0.511905	1403	1490		GT71	4
DR_005521-RA	GT2	4.2e-15	79	162	0.494048	1247	1331		GT72	0
DR_005624-RA	GT32	5.9e-21	6	89	0.922222	126	207		GT73	0
DR_005688-RA	GT1	2e-50	6	378	0.973822	928	1339		GT74	0
DR_005692-RA	GT25	2.4e-22	2	178	0.972376	65	288		GT75	0
DR_005800-RA	GT71	5.8e-42	2	250	0.939394	133	355		GT76	2
DR_005978-RA	GT15	3e-120	1	272	0.992674	74	352		GT77	0
DR_006072-RA	GT4	1.2e-36	8	153	0.90625	222	392		GT78	0
DR_006178-RA	GT2	1.4e-20	2	168	0.988095	223	400		GT79	0
DR_006210-RA	GT57	2.3e-126	98	479	0.7921	2	387		GT80	0
DR_006224-RA	GT21	6e-92	1	233	0.995708	75	391		GT81	0
DR_006248-RA	GT62	8.4e-103	5	268	0.981343	74	338		GT82	0
DR_006302-RA	GT20	5.3e-160	33	474	0.928421	163	615		GT83	0
DR_006369-RA	GT41	7.5e-52	302	519	0.307801	1338	1611		GT84	0
DR_006720-RA	GT22	4.4e-75	8	358	0.899743	14	417		GT85	0
DR_006802-RA	GT8	7.2e-20	74	254	0.700389	34	217		GT86	0
DR_006862-RA	GT35	3.8e-280	2	674	0.997033	187	902		GT87	0
DR_006912-RA	GT31	2.7e-08	60	187	0.661458	223	338		GT88	0
DR_006998-RA	GT50	6.7e-96	1	261	0.992366	133	405		GT89	0
DR_007125-RA	GT8	5.9e-39	22	254	0.902724	83	335		GT90	8
DR_007133-RA	GT71	9.1e-53	1	263	0.992424	144	374		GT91	0
DR_007238-RA	GT34	2e-80	2	244	0.98374	63	295		GT92	0
DR_007474-RA	GT8	6.9e-09	137	255	0.459144	117	246		GT93	0
DR_007649-RA	GT69	2.2e-72	1	238	0.991632	54	324		GT94	0
DR_007652-RA	GT66	3.9e-190	10	600	0.851371	132	781		GT95	0
DR_007676-RA	GT4	2.6e-14	6	149	0.89375	2544	2694		GT96	0
DR_007766-RA	GT32	8.5e-18	4	89	0.944444	123	207		GT97	0
DR_008038-RA	GT90	1.6e-52	3	192	0.756	246	473		GT98	0
DR_008072-RA	GT33	3.2e-149	3	423	0.988235	47	455		GT99	0
DR_008149-RA	GT32	1.9e-06	3	77	0.822222	123	191		GT100	0
DR_008235-RA	GT32	6.3e-10	50	87	0.411111	320	358		GT101	0
DR_008317-RA	GT62	2.2e-123	3	268	0.988806	84	347			168
DR_008436-RA	GT1	3.3e-31	73	305	0.60733	967	1239
DR_008440-RA	GT25	1.3e-22	2	178	0.972376	65	288
DR_008528-RA	GT15	1.3e-126	1	272	0.992674	89	359
DR_008770-RA	GT34	4.3e-80	2	244	0.98374	63	295
DR_008871-RA	GT59	4.1e-116	2	404	0.99505	63	540
DR_008926-RA	GT32	2.2e-22	2	87	0.944444	75	155
DR_008973-RA	GT8	2e-21	29	255	0.879377	107	343
DR_009011-RA	GT15	4.6e-121	1	272	0.992674	74	352
DR_009503-RA	GT8	1.1e-11	93	254	0.626459	162	332
DR_009545-RA	GT2	2e-07	79	168	0.529762	494	583
DR_009585-RA	GT22	3.8e-79	8	358	0.899743	14	399
DR_009606-RA	GT2	2.4e-14	79	164	0.505952	861	947
DR_009635-RA	GT8	1.1e-23	38	235	0.766537	68	293
DR_009689-RA	GT2	1.1e-07	2	167	0.982143	145	345
DR_009782-RA	GT4	5e-36	9	158	0.93125	503	670
DR_009783-RA	GT32	1.8e-18	3	88	0.944444	94	182
DR_009886-RA	GT4	1.2e-11	12	117	0.65625	243	354
DR_009894-RA	GT62	1.1e-111	2	267	0.988806	99	364
DR_009944-RA	GT1	2.6e-61	76	374	0.780105	298	627
DR_009966-RA	GT48	0	1	733	0.990528	873	1652
DR_010074-RA	GT22	2.6e-104	2	388	0.992288	40	505
DR_010182-RA	GT8	2.1e-42	26	255	0.891051	9	277
DR_010250-RA	GT28	4.1e-12	68	125	0.363057	89	146
DR_010307-RA	GT48	0	1	733	0.990528	676	1455
DR_010451-RA	GT2	2.5e-39	1	168	0.994048	10	183
DR_010503-RA	GT2	4.1e-39	1	168	0.994048	10	183
DR_010618-RA	GT28	5e-12	68	124	0.356688	89	145
DR_010776-RA	GT2	3.7e-15	79	162	0.494048	1084	1168
DR_010777-RA	GT2	1.9e-13	79	165	0.511905	1405	1492
DR_010789-RA	GT58	2.2e-143	2	364	0.994505	34	397
DR_010810-RA	GT59	3.9e-117	2	404	0.99505	63	516
DR_011042-RA	GT22	4.7e-103	2	388	0.992288	40	505
DR_011175-RA	GT31	3.6e-07	53	114	0.317708	165	227
DR_011189-RA	GT8	1.4e-44	30	253	0.867704	8	221
DR_011218-RA	GT4	3.6e-36	9	158	0.93125	496	663
DR_011219-RA	GT32	1.8e-18	3	88	0.944444	89	177
DR_011255-RA	GT1	2.6e-57	89	368	0.730366	326	634
DR_011279-RA	GT69	8.6e-61	2	237	0.983264	92	394
DR_011295-RA	GT62	2.2e-123	3	268	0.988806	84	347
DR_011338-RA	GT2	7.9e-06	79	168	0.529762	527	616
DR_011445-RA	GT2	2.4e-14	79	164	0.505952	861	947
DR_011497-RA	GT8	2.2e-28	26	198	0.669261	9	212
DR_011703-RA	GT31	4.4e-07	75	162	0.453125	225	299
DR_011916-RA	GT90	2.7e-74	3	247	0.976	406	696
DR_011944-RA	GT31	1.9e-07	36	112	0.395833	102	185
DR_012069-RA	GT2	3e-06	79	168	0.529762	525	614
DR_012100-RA	GT15	1.6e-126	1	272	0.992674	114	421
DR_012203-RA	GT90	3.4e-69	13	248	0.94	318	620
DR_012235-RA	GT32	4.8e-23	2	87	0.944444	75	155
DR_012420-RA	GT4	2.4e-27	7	151	0.9	364	522
DR_012570-RA	GT1	2.4e-57	90	368	0.727749	311	618
DR_012901-RA	GT21	5.9e-92	1	233	0.995708	75	391
DR_012907-RA	GT32	1.4e-20	6	89	0.922222	126	207
DR_012949-RA	GT31	3.4e-06	70	163	0.484375	221	300
DR_012960-RA	GT71	2.3e-38	2	216	0.810606	26	215
DR_012971-RA	GT20	1.5e-152	53	473	0.884211	167	653
DR_013330-RA	GT90	1.1e-84	3	248	0.98	377	647
DR_013334-RA	GT22	2.9e-73	2	386	0.987147	6	392
DR_013559-RA	GT41	1.7e-51	306	519	0.302128	1344	1612
DR_013617-RA	GT4	8.4e-28	7	151	0.9	363	521
DR_013631-RA	GT8	1.6e-14	125	235	0.428016	2	144
DR_013635-RA	GT65	9.6e-06	192	335	0.420588	279	413
DR_013735-RA	GT69	1e-14	2	103	0.422594	89	194
DR_013904-RA	GT2	3.5e-08	59	160	0.60119	294	421
DR_013933-RA	GT2	2.3e-12	63	168	0.625	151	259
DR_013951-RA	GT2	8.3e-06	79	166	0.517857	211	304

## Sheet: CE
			Subject			Query		Note
Query	Subject	E-value	Start	End	Covered fraction	Start	End			Subject	count
DR_000041-RA	CE1	2.4e-07	79	216	0.603524	79	268			CE1	26
DR_000077-RA	CE1	2.2e-09	93	218	0.550661	106	224			CE2	2
DR_000098-RA	CE1	1.6e-48	3	223	0.969163	25	278			CE3	13
DR_001243-RA	CE1	7.8e-18	5	161	0.687225	32	228			CE4	8
DR_001246-RA	CE1	6.5e-06	12	143	0.577093	19	182			CE5	14
DR_001363-RA	CE1	1.5e-12	12	208	0.863436	7	208			CE6	0
DR_001769-RA	CE1	3.1e-07	15	123	0.475771	85	182			CE7	1
DR_002254-RA	CE1	1.3e-07	80	190	0.484581	133	335			CE8	2
DR_002419-RA	CE1	1.5e-08	73	143	0.30837	199	318			CE9	0
DR_004046-RA	CE1	8.1e-10	3	174	0.753304	529	772			CE10	48
DR_004406-RA	CE1	2.8e-12	6	149	0.629956	445	617			CE11	0
DR_004672-RA	CE1	3.6e-07	79	215	0.599119	79	267			CE12	5
DR_004708-RA	CE1	1.8e-09	93	218	0.550661	106	224			CE13	0
DR_005300-RA	CE1	2.2e-17	5	164	0.700441	32	231			CE14	2
DR_005303-RA	CE1	6.1e-06	11	143	0.581498	18	190			CE15	0
DR_005344-RA	CE1	1.2e-10	12	208	0.863436	7	208			CE16	8
DR_006255-RA	CE1	1.5e-12	6	154	0.651982	445	623				129
DR_006473-RA	CE1	2.5e-11	23	143	0.528634	33	173
DR_007185-RA	CE1	1.5e-06	23	143	0.528634	128	280
DR_009669-RA	CE1	7e-49	3	223	0.969163	25	278
DR_010314-RA	CE1	7.1e-10	22	155	0.585903	32	162
DR_011277-RA	CE1	5.1e-07	10	143	0.585903	26	159
DR_013265-RA	CE1	9.8e-08	9	129	0.528634	66	214
DR_013288-RA	CE1	5e-07	15	143	0.563877	31	161
DR_013569-RA	CE1	1.4e-06	23	143	0.528634	98	250
DR_013801-RA	CE1	4.9e-06	56	194	0.60793	80	288
DR_000415-RA	CE10	3.2e-44	35	335	0.879765	39	340
DR_001052-RA	CE10	1.4e-16	62	315	0.741935	646	887
DR_001075-RA	CE10	4.8e-36	66	184	0.346041	122	243
DR_001209-RA	CE10	5.4e-28	76	187	0.325513	120	246
DR_001229-RA	CE10	7.4e-17	68	316	0.727273	448	689
DR_001327-RA	CE10	5.5e-24	98	203	0.307918	6	130
DR_001685-RA	CE10	1.1e-28	77	187	0.322581	158	291
DR_002046-RA	CE10	3.7e-50	94	334	0.703812	161	421
DR_002361-RA	CE10	4.5e-28	81	337	0.750733	131	413
DR_002863-RA	CE10	1.6e-50	73	326	0.741935	377	633
DR_002896-RA	CE10	1.5e-28	67	182	0.337243	112	236
DR_003073-RA	CE10	9.5e-28	73	182	0.319648	114	235
DR_003337-RA	CE10	7.2e-37	93	291	0.580645	134	326
DR_003727-RA	CE10	9.7e-28	75	202	0.372434	120	268
DR_003835-RA	CE10	3.9e-12	94	328	0.686217	57	276
DR_004233-RA	CE10	3.4e-29	77	314	0.695015	27	334
DR_004986-RA	CE10	1.1e-25	73	208	0.395894	165	378
DR_005581-RA	CE10	2.5e-06	84	189	0.307918	25	136
DR_005911-RA	CE10	8.5e-55	70	326	0.750733	379	633
DR_005934-RA	CE10	1.1e-30	34	193	0.466276	56	239
DR_006233-RA	CE10	1.6e-09	93	209	0.340176	89	215
DR_006241-RA	CE10	6.7e-11	81	254	0.507331	28	209
DR_006438-RA	CE10	7e-12	98	328	0.674487	61	276
DR_006468-RA	CE10	5e-29	68	231	0.478006	158	329
DR_007815-RA	CE10	2.8e-36	66	188	0.357771	122	249
DR_008246-RA	CE10	1.7e-29	71	205	0.392962	88	241
DR_008307-RA	CE10	2.2e-30	63	193	0.381232	94	251
DR_008420-RA	CE10	4.9e-28	76	179	0.302053	118	236
DR_008556-RA	CE10	9.7e-50	94	334	0.703812	161	421
DR_009051-RA	CE10	1.7e-30	35	193	0.463343	57	248
DR_009173-RA	CE10	3.4e-27	75	208	0.390029	161	324
DR_009286-RA	CE10	8.9e-20	148	334	0.545455	6	188
DR_009514-RA	CE10	4.8e-34	70	183	0.331378	140	258
DR_009619-RA	CE10	7.5e-17	68	316	0.727273	479	720
DR_010472-RA	CE10	1.3e-42	76	333	0.753666	175	590
DR_010992-RA	CE10	2.6e-36	89	324	0.68915	68	365
DR_011286-RA	CE10	7.1e-31	63	193	0.381232	94	252
DR_011484-RA	CE10	7.6e-34	74	225	0.442815	168	333
DR_012023-RA	CE10	6.1e-37	88	324	0.692082	67	365
DR_012303-RA	CE10	3.5e-16	136	309	0.507331	674	864
DR_012496-RA	CE10	6.8e-26	74	193	0.348974	166	302
DR_012544-RA	CE10	3.2e-29	81	335	0.744868	166	446
DR_012703-RA	CE10	2.2e-33	75	186	0.325513	107	240
DR_012776-RA	CE10	7.8e-10	81	208	0.372434	43	168
DR_013416-RA	CE10	1.2e-30	75	184	0.319648	166	297
DR_013474-RA	CE10	7e-43	76	333	0.753666	139	554
DR_013497-RA	CE10	7.1e-29	61	193	0.387097	151	316
DR_013611-RA	CE10	3.2e-45	93	291	0.580645	123	336
DR_001051-RA	CE12	2.9e-36	3	208	0.97619	59	242
DR_007958-RA	CE12	8.1e-42	1	209	0.990476	33	243
DR_012893-RA	CE12	4.3e-41	2	206	0.971429	29	215
DR_013089-RA	CE12	1.1e-40	1	209	0.990476	33	243
DR_013353-RA	CE12	2.9e-41	2	206	0.971429	31	217
DR_010993-RA	CE14	7.6e-09	4	123	0.959677	40	166
DR_012022-RA	CE14	5.8e-10	4	124	0.967742	40	167
DR_001488-RA	CE16	1.6e-80	4	266	0.981273	23	277
DR_001599-RA	CE16	3.1e-62	5	233	0.853933	8	240
DR_002164-RA	CE16	8.3e-74	3	266	0.985019	44	325
DR_003180-RA	CE16	1.2e-60	2	266	0.988764	31	273
DR_005494-RA	CE16	2.9e-61	1	266	0.992509	36	345
DR_009092-RA	CE16	3.5e-56	12	266	0.951311	10	251
DR_010802-RA	CE16	5.4e-30	72	212	0.524345	1	140
DR_012624-RA	CE16	4.1e-60	2	266	0.988764	22	264
DR_000789-RA	CE2	7e-13	34	186	0.727273	316	490
DR_006961-RA	CE2	4.7e-13	34	186	0.727273	301	475
DR_001490-RA	CE3	2.3e-47	1	192	0.984536	36	227
DR_003203-RA	CE3	9.8e-45	1	193	0.989691	11	207
DR_003847-RA	CE3	1.2e-50	1	194	0.994845	52	244
DR_005803-RA	CE3	1e-50	2	194	0.989691	64	255
DR_007387-RA	CE3	3.2e-50	1	194	0.994845	52	244
DR_009089-RA	CE3	2.2e-47	1	192	0.984536	36	227
DR_009633-RA	CE3	3e-57	1	194	0.994845	76	266
DR_009643-RA	CE3	2.9e-08	2	189	0.963918	12	201
DR_010909-RA	CE3	7.1e-06	2	147	0.747423	12	154
DR_011365-RA	CE3	1.2e-08	4	169	0.850515	13	204
DR_012321-RA	CE3	4.7e-44	1	194	0.994845	78	275
DR_012963-RA	CE3	6.1e-41	2	194	0.989691	44	222
DR_013629-RA	CE3	2.6e-58	1	194	0.994845	46	236
DR_003107-RA	CE4	6.8e-27	7	129	0.938462	113	235
DR_004555-RA	CE4	5.1e-19	24	127	0.792308	44	148
DR_004761-RA	CE4	1.9e-26	7	129	0.938462	113	235
DR_006522-RA	CE4	2.6e-19	24	127	0.792308	44	148
DR_008917-RA	CE4	1.8e-29	10	125	0.884615	32	156
DR_009196-RA	CE4	4.5e-34	8	126	0.907692	14	141
DR_012314-RA	CE4	5.9e-28	10	125	0.884615	118	242
DR_013822-RA	CE4	4.4e-33	8	126	0.907692	42	169
DR_000126-RA	CE5	1.8e-35	2	186	0.973545	74	246
DR_000515-RA	CE5	1.5e-34	7	188	0.957672	1	215
DR_002882-RA	CE5	3.3e-42	1	182	0.957672	40	202
DR_003706-RA	CE5	7e-43	2	189	0.989418	40	214
DR_005182-RA	CE5	6.3e-11	3	78	0.396825	37	105
DR_005182-RA	CE5	1.8e-12	106	176	0.37037	109	189
DR_005894-RA	CE5	3.1e-44	1	187	0.984127	39	206
DR_007288-RA	CE5	6.2e-43	2	188	0.984127	41	209
DR_008112-RA	CE5	1.4e-28	2	160	0.835979	74	210
DR_011264-RA	CE5	2e-28	43	188	0.767196	118	261
DR_012453-RA	CE5	2.8e-39	2	188	0.984127	41	224
DR_012559-RA	CE5	6e-30	4	188	0.973545	33	212
DR_013227-RA	CE5	1.3e-42	1	188	0.989418	101	270
DR_013880-RA	CE5	5.6e-18	2	89	0.460317	40	127
DR_002252-RA	CE7	3e-06	46	191	0.463259	63	224
DR_001192-RA	CE8	4.3e-67	3	274	0.940972	35	318
DR_003744-RA	CE8	9.5e-68	2	274	0.944444	34	318

## Sheet: CBM
			Subject			Query
Query	Subject	E-value	Start	End	Covered fraction	Start	End				Subject	count
DR_000059-RA	CBM50	0.00065	7	40	0.825	136	173				CBM1	5
DR_000944-RA	CBM1	8.4e-14	1	29	0.965517	432	460				CBM2	0
DR_001671-RA	CBM63	1.5e-21	3	70	0.858974	126	195				CBM3	0
DR_001779-RA	CBM42	7.5e-52	1	135	0.985294	359	499				CBM4	0
DR_001866-RA	CBM34	0.00038	28	89	0.508333	402	472				CBM5	0
DR_002255-RA	CBM67	4.3e-41	16	169	0.869318	138	302				CBM6	0
DR_002576-RA	CBM18	4.8e-07	2	34	0.842105	322	351				CBM7	0
DR_003149-RA	CBM43	1e-16	2	82	0.963855	386	474				CBM8	0
DR_003354-RA	CBM18	2.3e-05	7	35	0.736842	26	54				CBM9	0
DR_003471-RA	CBM20	8.9e-20	2	87	0.944444	531	619				CBM10	0
DR_003644-RA	CBM20	0.00027	24	65	0.455556	30	81				CBM11	0
DR_003816-RA	CBM21	4.2e-32	6	107	0.943925	348	451				CBM12	0
DR_004782-RA	CBM35	6.6e-06	18	120	0.829268	3	94				CBM13	0
DR_004974-RA	CBM50	0.00024	1	39	0.95	234	270				CBM14	0
DR_005433-RA	CBM16	7.4e-06	1	74	0.62931	172	259				CBM15	0
DR_005454-RA	CBM48	4.4e-08	2	46	0.578947	72	126				CBM16	1
DR_005739-RA	CBM50	7.2e-11	1	40	0.975	45	88				CBM17	0
DR_005739-RA	CBM50	1.5e-08	1	40	0.975	114	157				CBM18	7
DR_005802-RA	CBM1	2.5e-06	1	29	0.965517	508	537				CBM19	0
DR_006082-RA	CBM18	3.9e-05	7	35	0.736842	26	54				CBM20	4
DR_006456-RA	CBM21	4.8e-32	4	107	0.962617	347	452				CBM21	2
DR_007665-RA	CBM1	5.2e-12	1	29	0.965517	221	249				CBM22	0
DR_008488-RA	CBM50	1e-10	1	40	0.975	8	51				CBM23	0
DR_008488-RA	CBM50	3.9e-07	1	40	0.975	77	120				CBM24	0
DR_008619-RA	CBM1	1.3e-08	3	29	0.896552	24	50				CBM25	0
DR_009967-RA	CBM43	3.9e-19	1	83	0.987952	333	420				CBM26	0
DR_010305-RA	CBM43	3.4e-19	1	83	0.987952	384	471				CBM27	0
DR_010729-RA	CBM18	1.9e-06	2	35	0.868421	323	353				CBM28	0
DR_011126-RA	CBM18	2.2e-09	2	38	0.947368	83	125				CBM29	0
DR_011126-RA	CBM18	6.7e-07	1	38	0.973684	144	187				CBM30	0
DR_011126-RA	CBM18	2.4e-08	2	38	0.947368	225	265				CBM31	0
DR_011205-RA	CBM20	0.00035	24	65	0.455556	20	71				CBM32	0
DR_011749-RA	CBM42	6e-53	2	136	0.985294	309	449				CBM33	0
DR_011841-RA	CBM20	5.9e-20	2	87	0.944444	531	619				CBM34	1
DR_012470-RA	CBM67	8.2e-42	16	169	0.869318	138	302				CBM35	1
DR_012882-RA	CBM50	0.00024	1	39	0.95	234	270				CBM36	0
DR_013792-RA	CBM1	1.8e-07	3	29	0.896552	24	50				CBM37	0
DR_013846-RA	CBM63	1e-14	3	49	0.589744	85	133				CBM38	0
											CBM39	0
											CBM40	0
											CBM41	0
											CBM42	2
											CBM43	3
											CBM44	0
											CBM45	0
											CBM46	0
											CBM47	0
											CBM48	1
											CBM49	0
											CBM50	7
											CBM51	0
											CBM52	0
											CBM53	0
											CBM54	0
											CBM55	0
											CBM56	0
											CBM57	0
											CBM58	0
											CBM59	0
											CBM60	0
											CBM61	0
											CBM62	0
											CBM63	2
											CBM64	0
											CBM65	0
											CBM66	0
											CBM67	2
											CBM68	0
											CBM69	0
											CBM70	0
											CBM71	0
											CBM72	0
											CBM73	0
											CBM74	0
											CBM75	0
											CBM76	0
											CBM77	0
											CBM78	0
											CBM79	0
											CBM80	0
											CBM81	0
												38

## Sheet: Expression
Query	Subject	B2G discription	B2G_GO annotation	Enzyme Codes list	InterPro IDs	MACE_D0 - Normalized means	MACE_D0 - Means	MACE_D24 - Normalized means	MACE_D24 - Means	MACE_D72 - Normalized means	MACE_D72 - Means	RNA-Seq_ D72 - Means	RNA-Seq_D72 - Means RPKM
DR_000001-RA	GH32	Glycoside hydrolase family 32	P:sucrose catabolic process; C:cytoplasm; F:sucrose alpha-glucosidase activity	EC:3.2.1.26; EC:3.2.1.48	IPR001362 (SMART); IPR013148 (PFAM); IPR011040 (G3DSA:2.120.10.GENE3D); IPR013189 (G3DSA:2.60.120.GENE3D); PTHR30175 (PANTHER); PTHR30175:SF0 (PANTHER); IPR013320 (SUPERFAMILY); IPR023296 (SUPERFAMILY)	NA	NA	33.5264	1	33.0324	4	29.3333	26.6169
DR_000022-RA	GH17	GPI-anchored cell wall beta-endoglucanase [Marssonina brunnea multigermtubi MB_m1]	P:carbohydrate metabolic process; F:hydrolase activity	0	IPR013781 (G3DSA:3.20.20.GENE3D); PTHR16631 (PANTHER); PTHR16631:SF13 (PANTHER); IPR017853 (SUPERFAMILY)	NA	NA	738.891	17.3333	448.336	102	224.667	186.539
DR_000032-RA	GH55	1,3-beta glucanase [Marssonina brunnea multigermtubi MB_m1]	C:integral component of membrane; F:lyase activity; F:hydrolase activity	0	IPR024535 (PFAM); IPR012334 (G3DSA:2.160.20.GENE3D); PTHR31375 (PANTHER); PTHR31375:SF22 (PANTHER); IPR011050 (SUPERFAMILY)	NA	NA	NA	NA	NA	NA	5.33333	3.25762
DR_000041-RA	CE1	hydrolase [Marssonina brunnea multigermtubi MB_m1]	F:acylglycerol lipase activity; C:membrane; P:lipid metabolic process; P:regulation of signal transduction	EC:3.1.1.23	IPR022742 (PFAM); IPR029058 (G3DSA:3.40.50.GENE3D); PTHR11614 (PANTHER); IPR029058 (SUPERFAMILY)	NA	NA	NA	NA	30.9626	6	14.3333	16.7139
DR_000059-RA	CBM50	thiamine biosynthetic bifunctional enzyme [Marssonina brunnea multigermtubi MB_m1]	0	0	IPR018392 (G3DSA:3.10.350.GENE3D); IPR018392 (SUPERFAMILY)	NA	NA	NA	NA	8.30384	2.33333	5	3.88076
DR_000077-RA	CE1	homoserine acetyltransferase family	P:methionine biosynthetic process; F:polynucleotide adenylyltransferase activity; C:Mmi1 nuclear focus complex; P:snoRNA polyadenylation; P:mRNA polyadenylation; F:magnesium ion binding; F:homoserine O-acetyltransferase activity; F:ATP binding; F:RNA binding; C:mRNA cleavage and polyadenylation specificity factor complex; P:nuclear-transcribed mRNA catabolic process, meiosis-specific transcripts;…	EC:2.3.1.31; EC:2.7.7.19	IPR000073 (PFAM); IPR029058 (G3DSA:3.40.50.GENE3D); PTHR10992 (PANTHER); PTHR10992:SF903 (PANTHER); IPR029058 (SUPERFAMILY)	NA	NA	NA	NA	7.2353	2	27.6667	20.0806
DR_000098-RA	CE1	S-formylglutathione hydrol	C:nuclear envelope; F:S-formylglutathione hydrolase activity; P:formaldehyde catabolic process; C:mitochondrion; C:cytosol; C:nuclear matrix; P:tRNA splicing, via endonucleolytic cleavage and ligation; F:Ran GTPase binding; P:tRNA re-export from nucleus; F:carboxylic ester hydrolase activity	EC:3.1.2.12; EC:3.1.1.1	IPR000801 (PFAM); IPR029058 (G3DSA:3.40.50.GENE3D); IPR014186 (PANTHER); IPR029058 (SUPERFAMILY)	NA	NA	117.566	2.33333	67.443	11	34.3333	39.6389
DR_000117-RA	GT2	chitin synthase D	F:transferase activity, transferring hexosyl groups; C:integral component of membrane	0	IPR029044 (G3DSA:3.90.550.GENE3D); PF03142 (PFAM); IPR004835 (PANTHER); PTHR22914:SF21 (PANTHER); IPR029044 (SUPERFAMILY)	NA	NA	NA	NA	NA	NA	NA	NA
DR_000126-RA	CE5	cutinase [Colletotrichum gloeosporioides Nara gc5]	P:metabolic process; C:extracellular region; F:cutinase activity	EC:3.1.1.74	IPR011150 (PRINTS); IPR000675 (SMART); IPR000675 (PFAM); IPR029058 (G3DSA:3.40.50.GENE3D); PTHR15087:SF13 (PANTHER); PTHR15087 (PANTHER); IPR029058 (SUPERFAMILY)	NA	NA	NA	NA	NA	NA	NA	NA
DR_000132-RA	GH76	glycoside hydrolase family 76	F:mannan endo-1,6-alpha-mannosidase activity; P:carbohydrate catabolic process	EC:3.2.1.101	IPR012341 (G3DSA:1.50.10.GENE3D); IPR005198 (PFAM); IPR014480 (PIRSF); PTHR12145 (PANTHER); PTHR12145:SF19 (PANTHER); IPR008928 (SUPERFAMILY)	NA	NA	NA	NA	NA	NA	1	1.02728
DR_000165-RA	GT33	glycosyl transferase group 1 [Marssonina brunnea multigermtubi MB_m1]	F:transferase activity, transferring glycosyl groups; C:integral component of membrane	0	PF13692 (PFAM); PTHR13036:SF0 (PANTHER); IPR026051 (PANTHER); SSF53756 (SUPERFAMILY)	98.203	0.666667	NA	NA	15.5391	4.33333	20	17.6922
DR_000168-RA	AA9	Glycosyl hydrolase family 61 [Marssonina brunnea multigermtubi MB_m1]	P:glucan catabolic process; F:cellulase activity	EC:3.2.1.4	IPR005103 (PFAM); PTHR33353 (PANTHER); PTHR33353:SF10 (PANTHER)	NA	NA	NA	NA	NA	NA	NA	NA
DR_000194-RA	PL3	pectate lyase	F:pectate lyase activity; C:extracellular region	EC:4.2.2.2	IPR004898 (PFAM); IPR012334 (G3DSA:2.160.20.GENE3D); PTHR33407 (PANTHER); PTHR33407:SF7 (PANTHER); IPR011050 (SUPERFAMILY)	NA	NA	425.241	10.3333	115.702	30	26.3333	28.4479
DR_000222-RA	GT22	alg9-like mannosyltransferase	F:mannosyltransferase activity; P:mannosylation; C:integral component of membrane; C:endoplasmic reticulum	EC:2.4.1	IPR005599 (PFAM); IPR005599 (PANTHER); PTHR22760:SF2 (PANTHER)	NA	NA	NA	NA	NA	NA	18.3333	14.2663
DR_000236-RA	GH109	oxidoreductase family [Marssonina brunnea multigermtubi MB_m1]	F:oxidoreductase activity; P:oxidation-reduction process	0	G3DSA:3.30.360.10 (GENE3D); IPR004104 (PFAM); PTHR22604 (PANTHER); PTHR22604:SF53 (PANTHER); SSF55347 (SUPERFAMILY)	NA	NA	NA	NA	18.823	2.66667	11.3333	12.1629
DR_000323-RA	GH3	glycoside hydrolase family 3	F:beta-glucosidase activity; P:cellulose catabolic process; C:plasma membrane; F:scopolin beta-glucosidase activity	EC:3.2.1.21	IPR026891 (SMART); IPR001764 (G3DSA:3.20.20.GENE3D); IPR002772 (G3DSA:3.40.50.GENE3D); IPR001764 (PFAM); IPR002772 (PFAM); IPR026891 (PFAM); PTHR30620:SF52 (PANTHER); IPR026892 (PANTHER); IPR026892 (PANTHER); PTHR30620:SF52 (PANTHER); IPR026892 (PANTHER); IPR017853 (SUPERFAMILY); IPR002772 (SUPERFAMILY)	NA	NA	251.823	6.33333	89.7437	12	54	31.1152
DR_000347-RA	AA3	long chain fatty alcohol oxidase	F:oxidoreductase activity; P:signal transduction; P:single-organism metabolic process	0	PF13450 (PFAM); IPR023753 (G3DSA:3.50.50.GENE3D); PTHR11552:SF92 (PANTHER); PTHR11552 (PANTHER); IPR023753 (SUPERFAMILY)	NA	NA	NA	NA	NA	NA	10.3333	9.56113
DR_000396-RA	GH1	glycosyl hydrolase family 1 [Marssonina brunnea multigermtubi MB_m1]	P:carbohydrate metabolic process; F:hydrolase activity, hydrolyzing O-glycosyl compounds	0	IPR001360 (PRINTS); IPR001360 (PFAM); IPR013781 (G3DSA:3.20.20.GENE3D); IPR001360 (PANTHER); PTHR10353:SF67 (PANTHER); IPR017853 (SUPERFAMILY)	NA	NA	72.9524	1	28.5534	8	18.6667	18.3467
DR_000404-RA	GT8	LPXTG-motif cell wall anchor domain [Marssonina brunnea multigermtubi MB_m1]	F:transferase activity	0	IPR029044 (G3DSA:3.90.550.GENE3D); IPR029044 (SUPERFAMILY)	NA	NA	251.747	6.33333	220.471	35.3333	102	79.2308
DR_000415-RA	CE10	alpha beta-hydrolase [Phialocephala scopiformis]	P:metabolic process; C:membrane; C:integral component of membrane; F:hydrolase activity	0	IPR013094 (PFAM); IPR029058 (G3DSA:3.40.50.GENE3D); PTHR23024:SF210 (PANTHER); PTHR23024 (PANTHER); PTHR23024 (PANTHER); PTHR23024:SF210 (PANTHER); IPR029058 (SUPERFAMILY)	NA	NA	NA	NA	NA	NA	19.3333	20.2872
DR_000434-RA	GH31	glycoside hydrolase family 31	P:carbohydrate metabolic process; F:hydrolase activity, hydrolyzing O-glycosyl compounds; F:carbohydrate binding	0	IPR013785 (G3DSA:3.20.20.GENE3D); IPR000322 (PFAM); PTHR22762 (PANTHER); PTHR22762:SF38 (PANTHER); SSF51011 (SUPERFAMILY); SSF117125 (SUPERFAMILY); IPR017853 (SUPERFAMILY)	NA	NA	NA	NA	NA	NA	NA	NA
DR_000448-RA	PL4	rhamnogalacturonate lyase	F:catalytic activity	0	IPR029411 (PFAM); IPR008979 (G3DSA:2.60.120.GENE3D); IPR008979 (SUPERFAMILY)	NA	NA	55.9657	1.66667	120.278	26	43	31.1345
DR_000449-RA	AA2	peroxidase catalase 2 [Marssonina brunnea multigermtubi MB_m1]	P:response to oxidative stress; C:cytoplasm; F:metal ion binding; F:catalase activity; P:cellular oxidant detoxification; P:oxidation-reduction process; F:heme binding; P:hydrogen peroxide catabolic process	EC:1.11.1.6	IPR000763 (PRINTS); IPR002016 (PFAM); G3DSA:1.10.420.10 (GENE3D); G3DSA:1.10.520.10 (GENE3D); G3DSA:1.10.520.10 (GENE3D); PTHR30555 (PANTHER); PTHR30555:SF0 (PANTHER); PTHR30555 (PANTHER); PTHR30555:SF0 (PANTHER); IPR002016 (PROSITE_PROFILES); IPR010255 (SUPERFAMILY); IPR010255 (SUPERFAMILY)	NA	NA	257.609	5.33333	66.1508	13.3333	76.3333	52.2395
DR_000449-RA	AA2	peroxidase catalase 2 [Marssonina brunnea multigermtubi MB_m1]	P:response to oxidative stress; C:cytoplasm; F:metal ion binding; F:catalase activity; P:cellular oxidant detoxification; P:oxidation-reduction process; F:heme binding; P:hydrogen peroxide catabolic process	EC:1.11.1.6	IPR000763 (PRINTS); IPR002016 (PFAM); G3DSA:1.10.420.10 (GENE3D); G3DSA:1.10.520.10 (GENE3D); G3DSA:1.10.520.10 (GENE3D); PTHR30555 (PANTHER); PTHR30555:SF0 (PANTHER); PTHR30555 (PANTHER); PTHR30555:SF0 (PANTHER); IPR002016 (PROSITE_PROFILES); IPR010255 (SUPERFAMILY); IPR010255 (SUPERFAMILY)	NA	NA	257.609	5.33333	66.1508	13.3333	76.3333	52.2395
DR_000451-RA	GH105	glycoside hydrolase family 105 [Phialocephala scopiformis]	F:hydrolase activity	0	IPR010905 (PFAM); IPR012341 (G3DSA:1.50.10.GENE3D); PTHR33886:SF2 (PANTHER); PTHR33886 (PANTHER); IPR008928 (SUPERFAMILY)	NA	NA	106.441	2	22.5133	3.66667	8	8.65195
DR_000452-RA	PL4	rhamnogalacturonate lyase [Phialocephala scopiformis]	F:catalytic activity	0	IPR029413 (PFAM); IPR014766 (G3DSA:2.60.40.GENE3D); IPR029411 (PFAM); IPR008979 (G3DSA:2.60.120.GENE3D); PTHR32018 (PANTHER); IPR013784 (SUPERFAMILY); IPR008979 (SUPERFAMILY)	NA	NA	NA	NA	NA	NA	5.66667	2.95525
DR_000455-RA	AA7	FAD binding domain-containing	F:catalytic activity	0	IPR006094 (PFAM); IPR016167 (G3DSA:3.30.43.GENE3D); PTHR11748:SF77 (PANTHER); PTHR11748 (PANTHER); IPR016166 (PROSITE_PROFILES); IPR016166 (SUPERFAMILY)	67.1896	0.666667	710.931	17.6667	882.65	195	398.333	309.616
DR_000458-RA	AA5	glyoxal oxidase	F:chitin binding	0	IPR009880 (PFAM); IPR015916 (G3DSA:2.130.10.GENE3D); IPR015202 (PFAM); IPR013783 (G3DSA:2.60.40.GENE3D); IPR001002 (G3DSA:3.30.60.GENE3D); PTHR32208:SF21 (PANTHER); PTHR32208 (PANTHER); IPR014756 (SUPERFAMILY); IPR011043 (SUPERFAMILY)	NA	NA	NA	NA	NA	NA	NA	NA
DR_000491-RA	GT31	glycosyltransferase family 31	C:membrane; F:transferase activity	0	PTHR23033 (PANTHER); PTHR23033:SF18 (PANTHER); PTHR23033:SF18 (PANTHER)	NA	NA	NA	NA	NA	NA	15.6667	16.6932
DR_000515-RA	CE5	carbohydrate esterase family 5	P:metabolic process; F:hydrolase activity	0	IPR000675 (PFAM); IPR029058 (G3DSA:3.40.50.GENE3D); PTHR33630 (PANTHER); PTHR33630:SF1 (PANTHER); IPR029058 (SUPERFAMILY)	NA	NA	NA	NA	NA	NA	NA	NA
DR_000543-RA	GT39	dolichyl-phosphate-mannose- mannosyltransferase	P:fungal-type cell wall organization; P:filamentous growth; P:cell wall mannoprotein biosynthetic process; P:multicellular organism development; C:integral component of membrane; P:regulation of endoplasmic reticulum unfolded protein response; C:dolichyl-phosphate-mannose-protein mannosyltransferase complex; P:protein O-linked mannosylation; P:chain elongation of O-linked mannose residue; F:dolic…	EC:2.4.1.109	IPR016093 (SMART); G3DSA:2.80.10.50 (GENE3D); IPR016093 (PFAM); IPR032421 (PFAM); IPR027004 (PTHR10050:PANTHER); IPR027005 (PANTHER); IPR016093 (PROSITE_PROFILES); IPR016093 (PROSITE_PROFILES); IPR016093 (PROSITE_PROFILES); IPR016093 (SUPERFAMILY)	89.1325	1	NA	NA	4.80738	1.33333	23.3333	14.5941
DR_000573-RA	GT2	dolichyl-phosphate beta-glucosyltransferase	C:endoplasmic reticulum membrane; C:integral component of membrane; F:dolichyl-phosphate beta-glucosyltransferase activity; P:protein N-linked glycosylation	EC:2.4.1.117	IPR001173 (PFAM); IPR029044 (G3DSA:3.90.550.GENE3D); PTHR10859:SF91 (PANTHER); PTHR10859 (PANTHER); IPR029044 (SUPERFAMILY)	NA	NA	NA	NA	2.37945	0.666667	13.6667	14.2972
DR_000574-RA	PL4	rhamnogalacturonan lyase	F:catalytic activity	0	IPR014718 (G3DSA:2.70.98.GENE3D); IPR015364 (PFAM); PTHR36574 (PANTHER); PTHR36574:SF1 (PANTHER); IPR011013 (SUPERFAMILY)	NA	NA	167.783	5	83.0009	18	39	31.3911
DR_000691-RA	GH53	glycosyl hydrolase family 53	P:carbohydrate metabolic process; F:arabinogalactan endo-1,4-beta-galactosidase activity; F:glucosidase activity	EC:3.2.1.89; EC:3.2.1	IPR013781 (G3DSA:3.20.20.GENE3D); IPR011683 (PFAM); PTHR34983 (PANTHER); PTHR34983:SF1 (PANTHER); IPR017853 (SUPERFAMILY)	NA	NA	NA	NA	27.0783	5	17.6667	14.9503
DR_000734-RA	GH47	glycosyl hydrolase family 47 [Marssonina brunnea multigermtubi MB_m1]	F:organic cyclic compound binding; F:heterocyclic compound binding; P:glycoprotein ERAD pathway; F:calcium ion binding; P:N-glycan processing; C:integral component of membrane; F:mannosyl-oligosaccharide 1,2-alpha-mannosidase activity; P:protein deglycosylation involved in glycoprotein catabolic process; C:endoplasmic reticulum; P:ER-associated ubiquitin-dependent protein catabolic process	EC:3.2.1.113	IPR001382 (PRINTS); IPR001382 (G3DSA:1.50.10.GENE3D); IPR001382 (PFAM); PTHR11742:SF7 (PANTHER); PTHR11742 (PANTHER); IPR001382 (SUPERFAMILY)	NA	NA	72.8767	1	32.0124	3.66667	24	16.5052
DR_000789-RA	CE2	[Marssonina brunnea multigermtubi MB_m1]	C:nucleus; P:regulation of vacuole fusion, non-autophagic; P:vesicle-mediated transport; C:cytoplasm; C:membrane; C:integral component of membrane; C:cytosol	0	no IPS match	NA	NA	NA	NA	NA	NA	3	2.00947
DR_000791-RA	GH92	glycoside hydrolase family 92	P:carbohydrate metabolic process; F:carbohydrate binding; F:hydrolase activity, acting on glycosyl bonds	0	IPR012939 (PFAM); IPR014718 (G3DSA:2.70.98.GENE3D)	NA	NA	33.5264	1	207.394	50.3333	104	66.4345
DR_000797-RA	GH3	glycoside hydrolase family 3	P:glucan catabolic process; C:integral component of membrane; F:beta-glucosidase activity; C:plasma membrane	EC:3.2.1.21	IPR001764 (PRINTS); IPR026891 (SMART); IPR002772 (G3DSA:3.40.50.GENE3D); IPR001764 (PFAM); IPR002772 (PFAM); IPR001764 (G3DSA:3.20.20.GENE3D); IPR026891 (PFAM); PTHR30620:SF44 (PANTHER); IPR026892 (PANTHER); PTHR30620:SF44 (PANTHER); IPR026892 (PANTHER); IPR002772 (SUPERFAMILY); IPR017853 (SUPERFAMILY)	NA	NA	NA	NA	3.59341	1	18	12.2482
DR_000801-RA	GH76	glycoside hydrolase family 76	F:mannan endo-1,6-alpha-mannosidase activity; P:carbohydrate catabolic process; C:integral component of membrane; C:endoplasmic reticulum	EC:3.2.1.101	IPR005198 (PFAM); IPR012341 (G3DSA:1.50.10.GENE3D); PTHR12145:SF16 (PANTHER); PTHR12145 (PANTHER); IPR008928 (SUPERFAMILY)	NA	NA	NA	NA	NA	NA	24.6667	23.4609
DR_000804-RA	GT2	Nucleotide-diphospho-sugar transferase [Glarea lozoyensis ATCC 20868]	C:integral component of membrane; F:transferase activity	0	IPR001173 (PFAM); IPR029044 (G3DSA:3.90.550.GENE3D); PTHR35408:SF3 (PANTHER); PTHR35408 (PANTHER); PTHR35408:SF3 (PANTHER); PTHR35408 (PANTHER); IPR029044 (SUPERFAMILY)	NA	NA	NA	NA	NA	NA	3.66667	2.13972
DR_000827-RA	AA3	GMC oxidoreductase	F:oxidoreductase activity	0	IPR000172 (PFAM); IPR023753 (G3DSA:3.50.50.GENE3D); G3DSA:3.30.560.10 (GENE3D); PTHR11552 (PANTHER); PTHR11552:SF78 (PANTHER); IPR023753 (SUPERFAMILY)	NA	NA	NA	NA	NA	NA	NA	NA
DR_000828-RA	AA3	GMC oxidoreductase	F:oxidoreductase activity, acting on CH-OH group of donors; F:flavin adenine dinucleotide binding; P:oxidation-reduction process	0	IPR000172 (PFAM); IPR023753 (G3DSA:3.50.50.GENE3D); IPR007867 (PFAM); IPR012132 (PIRSF); PTHR11552:SF101 (PANTHER); PTHR11552 (PANTHER); IPR023753 (SUPERFAMILY); SSF54373 (SUPERFAMILY)	NA	NA	NA	NA	NA	NA	NA	NA
DR_000878-RA	GH74	vacuolar sorting targeting PEP1 [Marssonina brunnea multigermtubi MB_m1]	C:integral component of membrane; C:Golgi apparatus; P:transport; F:hydrolase activity	0	IPR006581 (SMART); IPR031778 (PFAM); G3DSA:2.130.10.140 (GENE3D); IPR031777 (PFAM); PTHR12106:SF27 (PANTHER); PTHR12106 (PANTHER); IPR011040 (SUPERFAMILY); SSF110296 (SUPERFAMILY)	NA	NA	89.4163	2.66667	81.6525	12.3333	74	37.832
DR_000878-RA	GH74	vacuolar sorting targeting PEP1 [Marssonina brunnea multigermtubi MB_m1]	C:integral component of membrane; C:Golgi apparatus; P:transport; F:hydrolase activity	0	IPR006581 (SMART); IPR031778 (PFAM); G3DSA:2.130.10.140 (GENE3D); IPR031777 (PFAM); PTHR12106:SF27 (PANTHER); PTHR12106 (PANTHER); IPR011040 (SUPERFAMILY); SSF110296 (SUPERFAMILY)	NA	NA	89.4163	2.66667	81.6525	12.3333	74	37.832
DR_000878-RA	GH74	vacuolar sorting targeting PEP1 [Marssonina brunnea multigermtubi MB_m1]	C:integral component of membrane; C:Golgi apparatus; P:transport; F:hydrolase activity	0	IPR006581 (SMART); IPR031778 (PFAM); G3DSA:2.130.10.140 (GENE3D); IPR031777 (PFAM); PTHR12106:SF27 (PANTHER); PTHR12106 (PANTHER); IPR011040 (SUPERFAMILY); SSF110296 (SUPERFAMILY)	NA	NA	89.4163	2.66667	81.6525	12.3333	74	37.832
DR_000924-RA	AA3	alcohol oxidase [Phialocephala scopiformis]	F:oxidoreductase activity, acting on CH-OH group of donors; F:flavin adenine dinucleotide binding; P:oxidation-reduction process	0	IPR007867 (PFAM); IPR023753 (G3DSA:3.50.50.GENE3D); IPR000172 (PFAM); IPR012132 (PIRSF); PTHR11552 (PANTHER); PTHR11552 (PANTHER); PTHR11552:SF100 (PANTHER); PTHR11552:SF100 (PANTHER); SSF54373 (SUPERFAMILY); IPR023753 (SUPERFAMILY)	233.943	1.66667	22.3635	0.666667	NA	NA	22	14.1515
DR_000944-RA	AA9	Cellulose-binding [Glarea lozoyensis ATCC 20868]	P:polysaccharide catabolic process; F:hydrolase activity, hydrolyzing O-glycosyl compounds	0	IPR005103 (PFAM); PTHR33353 (PANTHER)	NA	NA	140.043	3	44.9109	4.66667	135.667	123.199
DR_000944-RA	CBM1	Cellulose-binding [Glarea lozoyensis ATCC 20868]	P:polysaccharide catabolic process; F:hydrolase activity, hydrolyzing O-glycosyl compounds	0	IPR005103 (PFAM); PTHR33353 (PANTHER)	NA	NA	140.043	3	44.9109	4.66667	135.667	123.199
DR_000951-RA	GT2	chitin synthase 2 [Marssonina brunnea multigermtubi MB_m1]	P:chitin biosynthetic process; C:integral component of membrane; F:chitin synthase activity	EC:2.4.1.16	IPR004834 (PFAM); IPR013616 (PFAM); IPR004835 (PANTHER); PTHR22914:SF15 (PANTHER); IPR004834 (PRODOM)	NA	NA	NA	NA	NA	NA	23.6667	13.6609
DR_000975-RA	GT1	glycosyltransferase family 1	P:carbohydrate metabolic process; F:transferase activity, transferring hexosyl groups; P:metabolic process; F:transferase activity; P:lipid glycosylation	0	no IPS match	67.1896	0.666667	67.0906	2	17.6762	5	56	32.9506
DR_000976-RA	GT39	dolichyl-phosphate-mannose- mannosyltransferase	P:fungal-type cell wall organization; P:filamentous growth; P:cell wall mannoprotein biosynthetic process; P:multicellular organism development; C:integral component of membrane; P:regulation of endoplasmic reticulum unfolded protein response; C:dolichyl-phosphate-mannose-protein mannosyltransferase complex; P:protein O-linked mannosylation; P:chain elongation of O-linked mannose residue; F:dolic…	EC:2.4.1.109	IPR016093 (SMART); G3DSA:2.80.10.50 (GENE3D); IPR003342 (PFAM); IPR032421 (PFAM); IPR016093 (PFAM); IPR027005 (PANTHER); PTHR10050:SF26 (PANTHER); IPR016093 (PROSITE_PROFILES); IPR016093 (PROSITE_PROFILES); IPR016093 (PROSITE_PROFILES); IPR016093 (SUPERFAMILY)	NA	NA	NA	NA	15.5391	4.33333	88.3333	59.7345
DR_000978-RA	GH109	dimeric dihydrodiol dehydrogenase [Fusarium fujikuroi]	F:oxidoreductase activity; P:oxidation-reduction process	0	IPR016040 (G3DSA:3.40.50.GENE3D); G3DSA:3.30.360.10 (GENE3D); PTHR22604:SF115 (PANTHER); PTHR22604 (PANTHER); SSF55347 (SUPERFAMILY); IPR016040 (SUPERFAMILY)	NA	NA	112.303	1	24.8146	7	19	19.6844
DR_000987-RA	AA7	FAD-binding domain-containing [Phialocephala scopiformis]	F:oxidoreductase activity, acting on CH-OH group of donors; F:flavin adenine dinucleotide binding; P:oxidation-reduction process	0	no IPS match	NA	NA	NA	NA	NA	NA	4	2.23886
DR_001005-RA	GT39	dolichyl-phosphate-mannose- mannosyltransferase	P:fungal-type cell wall organization; P:filamentous growth; F:substrate-specific transmembrane transporter activity; P:cell wall mannoprotein biosynthetic process; P:transmembrane transport; P:multicellular organism development; C:integral component of membrane; P:regulation of endoplasmic reticulum unfolded protein response; C:dolichyl-phosphate-mannose-protein mannosyltransferase complex; P:pro…	EC:2.4.1.109	IPR016093 (SMART); IPR016093 (PFAM); G3DSA:2.80.10.50 (GENE3D); PTHR10050:SF32 (PANTHER); IPR027005 (PANTHER); IPR016093 (PROSITE_PROFILES); IPR016093 (PROSITE_PROFILES); IPR016093 (PROSITE_PROFILES); IPR016093 (SUPERFAMILY)	120.146	1	NA	NA	20.2308	3	72	48.7912
DR_001051-RA	CE12	SGNH partial [Phialocephala scopiformis]	F:hydrolase activity	0	IPR013830 (G3DSA:3.40.50.GENE3D); IPR013830 (SUPERFAMILY)	NA	NA	777.605	19.6667	311.722	48	44.6667	44.4691
DR_001052-RA	CE10	dipeptidyl-aminopeptidase B [Phialocephala scopiformis]	F:oxidoreductase activity; P:proteolysis; C:integral component of membrane; F:serine-type peptidase activity; F:aminopeptidase activity; P:oxidation-reduction process; C:vacuolar membrane	EC:3.4.11	IPR029058 (G3DSA:3.40.50.GENE3D); IPR002469 (PFAM); IPR002469 (G3DSA:2.140.10.GENE3D); IPR001375 (PFAM); PTHR11731 (PANTHER); PTHR11731:SF125 (PANTHER); SSF82171 (SUPERFAMILY); IPR029058 (SUPERFAMILY)	NA	NA	61.7138	0.666667	33.2638	9.33333	36.6667	20.998
DR_001075-RA	CE10	alpha beta-hydrolase [Phialocephala scopiformis]	F:hydrolase activity	0	IPR002018 (PFAM); IPR029058 (G3DSA:3.40.50.GENE3D); PTHR11559:SF201 (PANTHER); PTHR11559 (PANTHER); IPR029058 (SUPERFAMILY)	NA	NA	NA	NA	18.823	2.66667	45	37.2393
DR_001097-RA	AA8	GMC oxidoreductase	F:organic cyclic compound binding; F:heterocyclic compound binding; F:oxidoreductase activity	0	IPR023753 (G3DSA:3.50.50.GENE3D); IPR015920 (PFAM); IPR007867 (PFAM); IPR000172 (PFAM); IPR015920 (G3DSA:2.60.40.GENE3D); PTHR11552:SF57 (PANTHER); PTHR11552 (PANTHER); IPR023753 (SUPERFAMILY); SSF54373 (SUPERFAMILY); SSF49344 (SUPERFAMILY)	NA	NA	NA	NA	NA	NA	6	4.33847
DR_001176-RA	GT76	duf409 domain	F:transferase activity	0	IPR007315 (PFAM); IPR007315 (PANTHER); PTHR12468:SF2 (PANTHER)	NA	NA	NA	NA	NA	NA	8.33333	8.2596
DR_001192-RA	CE8	pectin methyl esterase [Marssonina brunnea multigermtubi MB_m1]	F:hydrolase activity, acting on ester bonds; P:carbohydrate metabolic process; P:cell wall organization; F:hydrolase activity, acting on glycosyl bonds	0	IPR000070 (PFAM); IPR012334 (G3DSA:2.160.20.GENE3D); PTHR31321:SF1 (PANTHER); PTHR31321 (PANTHER); IPR011050 (SUPERFAMILY)	112.436	1	1645.23	42	1389.64	251	512.333	488.895
DR_001209-RA	CE10	extracellular lipase	F:carboxylic ester hydrolase activity; F:hydrolase activity	0	IPR002018 (PFAM); IPR029058 (G3DSA:3.40.50.GENE3D); PTHR11559:SF162 (PANTHER); PTHR11559:SF162 (PANTHER); PTHR11559 (PANTHER); PTHR11559 (PANTHER); IPR029058 (SUPERFAMILY)	NA	NA	NA	NA	18.8714	2.66667	9	6.44953
DR_001213-RA	GH16	glycoside hydrolase family 16	F:catalytic activity	0	IPR013320 (G3DSA:2.60.120.GENE3D); IPR000757 (PFAM); PTHR38121:SF2 (PANTHER); PTHR38121 (PANTHER); IPR000757 (PROSITE_PROFILES); IPR013320 (SUPERFAMILY)	NA	NA	NA	NA	NA	NA	NA	NA
DR_001229-RA	CE10	alpha beta-Hydrolase [Glarea lozoyensis ATCC 20868]	F:hydrolase activity	0	IPR015943 (G3DSA:2.130.10.GENE3D); IPR029058 (G3DSA:3.40.50.GENE3D); IPR001375 (PFAM); PTHR11731:SF149 (PANTHER); PTHR11731 (PANTHER); IPR029058 (SUPERFAMILY); SSF101908 (SUPERFAMILY)	NA	NA	NA	NA	NA	NA	NA	NA
DR_001243-RA	CE1	Poly(3-hydroxybutyrate) depolymerase [Marssonina brunnea multigermtubi MB_m1]	0	0	IPR029058 (G3DSA:3.40.50.GENE3D); PTHR38050 (PANTHER); PTHR38050:SF2 (PANTHER); IPR029058 (SUPERFAMILY)	NA	NA	NA	NA	34.4403	4.33333	7.33333	8.14092
DR_001246-RA	CE1	alpha beta-hydrolase	C:nucleus; C:membrane; C:cytosol; F:hydrolase activity	0	IPR029058 (G3DSA:3.40.50.GENE3D); IPR003140 (PFAM); PTHR10655:SF2 (PANTHER); PTHR10655 (PANTHER); IPR029058 (SUPERFAMILY)	NA	NA	NA	NA	NA	NA	NA	NA
DR_001262-RA	GH31	glucosidase II alpha subunit [Marssonina brunnea multigermtubi MB_m1]	P:carbohydrate metabolic process; F:hydrolase activity, hydrolyzing O-glycosyl compounds; F:carbohydrate binding	0	IPR033403 (PFAM); IPR025887 (PFAM); IPR000322 (PFAM); PTHR22762 (PANTHER); PTHR22762:SF54 (PANTHER); PTHR22762 (PANTHER); PTHR22762:SF54 (PANTHER); SSF51011 (SUPERFAMILY); IPR011013 (SUPERFAMILY); IPR017853 (SUPERFAMILY)	NA	NA	44.7271	1.33333	48.717	8.33333	66	38.659
DR_001269-RA	GT28	L-arabinokinase [Marssonina brunnea multigermtubi MB_m1]	P:phosphorylation; F:kinase activity	0	PTHR38134 (PANTHER); PTHR38134:SF2 (PANTHER); SSF53756 (SUPERFAMILY)	NA	NA	NA	NA	NA	NA	3.33333	2.27612
DR_001303-RA	AA7	hypothetical protein OIDMADRAFT_148787	F:oxidoreductase activity, acting on CH-OH group of donors; F:flavin adenine dinucleotide binding; F:oxidoreductase activity; F:catalytic activity; P:oxidation-reduction process	0	IPR016169 (G3DSA:3.30.465.GENE3D); IPR006094 (PFAM); PTHR11748:SF91 (PANTHER); PTHR11748:SF91 (PANTHER); PTHR11748 (PANTHER); PTHR11748 (PANTHER); IPR016166 (PROSITE_PROFILES); IPR016166 (SUPERFAMILY); IPR016166 (SUPERFAMILY)	NA	NA	44.6892	1.33333	222.159	41	115	86.813
DR_001316-RA	GT32	snoRNA binding	C:integral component of membrane; F:transferase activity	0	IPR007577 (PFAM); PTHR12042 (PANTHER); IPR029044 (SUPERFAMILY)	NA	NA	NA	NA	NA	NA	9	7.66096
DR_001318-RA	GH28	Rhamnogalacturonase A [Phialocephala scopiformis]	F:hydrolase activity, acting on glycosyl bonds	0	IPR012334 (G3DSA:2.160.20.GENE3D); PTHR31736:SF7 (PANTHER); PTHR31736 (PANTHER); IPR011050 (SUPERFAMILY)	NA	NA	NA	NA	NA	NA	8.66667	11.7582
DR_001327-RA	CE10	carboxylesterase [Phialocephala scopiformis]	C:membrane; C:integral component of membrane; F:N-acetyltransferase activity; F:hydrolase activity	0	IPR002018 (PFAM); IPR029058 (G3DSA:3.40.50.GENE3D); PTHR11559:SF236 (PANTHER); PTHR11559 (PANTHER); PTHR11559 (PANTHER); IPR029058 (SUPERFAMILY)	NA	NA	NA	NA	NA	NA	NA	NA
DR_001363-RA	CE1	Acyl- thioesterase 1	F:palmitoyl-(protein) hydrolase activity; C:cytoplasm; P:protein depalmitoylation; F:carboxylic ester hydrolase activity	EC:3.1.2.22; EC:3.1.1.1	IPR029058 (G3DSA:3.40.50.GENE3D); IPR003140 (PFAM); PTHR10655:SF17 (PANTHER); PTHR10655 (PANTHER); IPR029058 (SUPERFAMILY)	NA	NA	NA	NA	74.2905	13	38.3333	40.7284
DR_001383-RA	GT3	glycogen synthase	P:glycogen biosynthetic process; F:glycogen (starch) synthase activity	EC:2.4.1.11	IPR008631 (PFAM); IPR008631 (PANTHER); PTHR10176:SF3 (PANTHER); SSF53756 (SUPERFAMILY); SSF53756 (SUPERFAMILY)	NA	NA	NA	NA	2.37945	0.666667	63.3333	46.6319
DR_001396-RA	AA7	FAD binding domain-containing	F:oxidoreductase activity, acting on CH-OH group of donors; F:oxidoreductase activity; F:flavin adenine dinucleotide binding; F:catalytic activity; P:oxidation-reduction process	0	IPR006094 (PFAM); IPR016169 (G3DSA:3.30.465.GENE3D); PTHR11748:SF88 (PANTHER); PTHR11748 (PANTHER); IPR016166 (PROSITE_PROFILES); IPR016166 (SUPERFAMILY)	NA	NA	NA	NA	NA	NA	NA	NA
DR_001481-RA	GH20	beta-hexosaminidase precursor [Marssonina brunnea multigermtubi MB_m1]	F:ATP binding; P:carbohydrate metabolic process; F:protein kinase activity; P:protein phosphorylation; F:beta-N-acetylhexosaminidase activity	EC:3.2.1.52	IPR025705 (PRINTS); IPR029019 (PFAM); IPR025705 (PIRSF); IPR029018 (G3DSA:3.30.379.GENE3D); IPR015883 (PFAM); IPR013781 (G3DSA:3.20.20.GENE3D); PTHR22600:SF19 (PANTHER); PTHR22600 (PANTHER); PTHR22600:SF19 (PANTHER); PTHR22600 (PANTHER); IPR017853 (SUPERFAMILY); IPR029018 (SUPERFAMILY)	NA	NA	78.1777	2.33333	79.5044	17	152.333	122.812
DR_001488-RA	CE16	GDSL-like Lipase Acylhydrolase [Marssonina brunnea multigermtubi MB_m1]	F:hydrolase activity	0	IPR001087 (PFAM); IPR013830 (G3DSA:3.40.50.GENE3D); PTHR22835:SF198 (PANTHER); PTHR22835 (PANTHER); IPR013830 (SUPERFAMILY)	NA	NA	NA	NA	NA	NA	12.3333	13.2883
DR_001490-RA	CE3	lipolytic enzyme [Marssonina brunnea multigermtubi MB_m1]	F:hydrolase activity	0	IPR013830 (PFAM); IPR013830 (G3DSA:3.40.50.GENE3D); PTHR30383 (PANTHER); PTHR30383:SF9 (PANTHER); IPR013830 (SUPERFAMILY)	NA	NA	475.307	13	243.449	50	63.3333	69.8299
DR_001513-RA	GH74	fungal cellulose binding domain-containing [Marssonina brunnea multigermtubi MB_m1]	F:binding	0	G3DSA:2.130.10.140 (GENE3D); SSF110296 (SUPERFAMILY)	NA	NA	NA	NA	5.97286	1.66667	1	0.595958
DR_001599-RA	CE16	carbohydrate esterase family 16	F:hydrolase activity	0	IPR013830 (G3DSA:3.40.50.GENE3D); PTHR22835:SF53 (PANTHER); PTHR22835 (PANTHER); IPR013830 (SUPERFAMILY)	NA	NA	NA	NA	NA	NA	10.6667	12.9663
DR_001602-RA	GT15	WD domain-containing [Marssonina brunnea multigermtubi MB_m1]	C:nucleus; F:mannosyltransferase activity; F:oxidoreductase activity; P:transcription, DNA-templated; P:mannosylation; C:integral component of membrane; P:protein glycosylation; C:cytosol; P:regulation of transcription, DNA-templated; P:oxidation-reduction process	EC:2.4.1	IPR029044 (G3DSA:3.90.550.GENE3D); IPR002685 (PFAM); PTHR31121:SF7 (PANTHER); IPR002685 (PANTHER); IPR029044 (SUPERFAMILY)	NA	NA	NA	NA	NA	NA	NA	NA
DR_001639-RA	GH125	DUF1237 domain-containing	F:catalytic activity; C:membrane; C:integral component of membrane	0	IPR008313 (SMART); IPR008313 (PFAM); IPR012341 (G3DSA:1.50.10.GENE3D); PTHR31047:SF2 (PANTHER); PTHR31047 (PANTHER); IPR008928 (SUPERFAMILY)	NA	NA	190.071	5.66667	79.6014	17	62.6667	46.2504
DR_001671-RA	CBM63	Barwin-like endoglucanase [Glarea lozoyensis ATCC 20868]	P:defense response to fungus; P:defense response to bacterium	0	IPR007117 (G3DSA:2.60.40.GENE3D); IPR007117 (PFAM); IPR009009 (PFAM); IPR009009 (G3DSA:2.40.40.GENE3D); PTHR31836:SF17 (PANTHER); PTHR31836 (PANTHER); IPR007112 (PROSITE_PROFILES); IPR009009 (SUPERFAMILY); IPR007117 (SUPERFAMILY)	NA	NA	134.181	4	250.168	54.3333	74.3333	59.24
DR_001679-RA	GT4	phosphatidylinositol N-acetylglucosaminyltransferase GPI3 subunit [Marssonina brunnea multigermtubi MB_m1]	P:GPI anchor biosynthetic process; C:integral component of membrane; F:phosphatidylinositol N-acetylglucosaminyltransferase activity; C:endoplasmic reticulum	EC:2.4.1.198	G3DSA:3.40.50.2000 (GENE3D); IPR001296 (PFAM); PTHR12526 (PANTHER); PTHR12526:SF232 (PANTHER); SSF53756 (SUPERFAMILY)	NA	NA	NA	NA	NA	NA	3.66667	2.69431
DR_001685-RA	CE10	acetylcholinesterase precursor	F:hydrolase activity	0	IPR029058 (G3DSA:3.40.50.GENE3D); IPR002018 (PFAM); PTHR11559:SF160 (PANTHER); PTHR11559 (PANTHER); IPR029058 (SUPERFAMILY)	NA	NA	313.165	9.33333	60.4501	9	52.6667	37.6547
DR_001723-RA	GT90	glycosyltransferase family 90	F:transferase activity	0	no IPS match	NA	NA	NA	NA	NA	NA	NA	NA
DR_001747-RA	GH105	cell wall glycosyl hydrolase [Marssonina brunnea multigermtubi MB_m1]	F:hydrolase activity	0	IPR010905 (PFAM); IPR012341 (G3DSA:1.50.10.GENE3D); PTHR33886:SF3 (PANTHER); PTHR33886 (PANTHER); IPR008928 (SUPERFAMILY)	NA	NA	NA	NA	NA	NA	7	4.01052
DR_001751-RA	GT15	glycosyltransferase family 15 [Phialocephala scopiformis]	P:cell wall mannoprotein biosynthetic process; P:mannosylation; C:integral component of membrane; P:protein N-linked glycosylation; C:Golgi apparatus; F:alpha-1,2-mannosyltransferase activity	EC:2.4.1	IPR029044 (G3DSA:3.90.550.GENE3D); IPR002685 (PFAM); PTHR31121:SF2 (PANTHER); IPR002685 (PANTHER); IPR002685 (PANTHER); PTHR31121:SF2 (PANTHER); PTHR31121:SF2 (PANTHER); IPR002685 (PANTHER); IPR029044 (SUPERFAMILY)	NA	NA	NA	NA	15.2295	1.66667	23.3333	19.2697
DR_001769-RA	CE1	dual specificity phosphatase catalytic domain [Marssonina brunnea multigermtubi MB_m1]	F:protein tyrosine phosphatase activity; P:peptidyl-tyrosine dephosphorylation; F:protein tyrosine/serine/threonine phosphatase activity	EC:3.1.3.48; EC:3.1.3	IPR000340 (PFAM); IPR000073 (PFAM); IPR029021 (G3DSA:3.90.190.GENE3D); IPR029058 (G3DSA:3.40.50.GENE3D); PTHR10367:SF6 (PANTHER); PTHR10367 (PANTHER); IPR000387 (PROSITE_PROFILES); IPR029058 (SUPERFAMILY); IPR029021 (SUPERFAMILY)	NA	NA	NA	NA	NA	NA	NA	NA
DR_001779-RA	GH54	Concanavalin A-like lectin glucanases superfamily [Penicillium expansum]	P:polysaccharide catabolic process; F:alpha-L-arabinofuranosidase activity; P:arabinose metabolic process; P:arabinan metabolic process; C:extracellular region	EC:3.2.1.55	IPR015289 (PFAM); IPR007934 (PFAM); IPR013320 (G3DSA:2.60.120.GENE3D); G3DSA:2.80.10.50 (GENE3D); PTHR39447 (PANTHER); PTHR39447:SF2 (PANTHER); IPR013320 (SUPERFAMILY); IPR007934 (SUPERFAMILY)	NA	NA	NA	NA	21.3963	3.33333	37	33.8705
DR_001779-RA	CBM42	Concanavalin A-like lectin glucanases superfamily [Penicillium expansum]	P:polysaccharide catabolic process; F:alpha-L-arabinofuranosidase activity; P:arabinose metabolic process; P:arabinan metabolic process; C:extracellular region	EC:3.2.1.55	IPR015289 (PFAM); IPR007934 (PFAM); IPR013320 (G3DSA:2.60.120.GENE3D); G3DSA:2.80.10.50 (GENE3D); PTHR39447 (PANTHER); PTHR39447:SF2 (PANTHER); IPR013320 (SUPERFAMILY); IPR007934 (SUPERFAMILY)	NA	NA	NA	NA	21.3963	3.33333	37	33.8705
DR_001795-RA	GH109	oxidoreductase [Phialocephala scopiformis]	F:oxidoreductase activity; P:metabolic process; P:oxidation-reduction process	0	no IPS match	NA	NA	NA	NA	5.92439	1.66667	7.33333	7.57696
DR_001806-RA	GH5	endo-beta-1,4-glucanase precursor [Marssonina brunnea multigermtubi MB_m1]	P:carbohydrate metabolic process; F:hydrolase activity, hydrolyzing O-glycosyl compounds	0	IPR001547 (PFAM); IPR013781 (G3DSA:3.20.20.GENE3D); PTHR34142 (PANTHER); IPR017853 (SUPERFAMILY)	NA	NA	NA	NA	NA	NA	NA	NA
DR_001820-RA	GH131	carbohydrate-binding module family 1 [Neurospora crassa]	P:carbohydrate metabolic process; C:extracellular region; F:hydrolase activity, hydrolyzing O-glycosyl compounds; F:cellulose binding	0	PTHR34612 (PANTHER); PTHR34612:SF1 (PANTHER)	67.1896	0.666667	442.94	7.33333	241.129	44	67.3333	69.3037
DR_001828-RA	PL4	Rhamnogalacturonase B	P:carbohydrate metabolic process; F:carbon-oxygen lyase activity, acting on polysaccharides; C:membrane; F:carbohydrate binding	0	IPR029411 (PFAM); IPR008979 (G3DSA:2.60.120.GENE3D); IPR029413 (PFAM); IPR014766 (G3DSA:2.60.40.GENE3D); PTHR36574:SF1 (PANTHER); PTHR36574 (PANTHER); IPR008979 (SUPERFAMILY); IPR013784 (SUPERFAMILY)	NA	NA	NA	NA	NA	NA	1	0.54575
DR_001828-RA	PL4	Rhamnogalacturonase B	P:carbohydrate metabolic process; F:carbon-oxygen lyase activity, acting on polysaccharides; C:membrane; F:carbohydrate binding	0	IPR029411 (PFAM); IPR008979 (G3DSA:2.60.120.GENE3D); IPR029413 (PFAM); IPR014766 (G3DSA:2.60.40.GENE3D); PTHR36574:SF1 (PANTHER); PTHR36574 (PANTHER); IPR008979 (SUPERFAMILY); IPR013784 (SUPERFAMILY)	NA	NA	NA	NA	NA	NA	1	0.54575
DR_001852-RA	GH132	sun domain	C:nucleus; C:cytosol	0	no IPS match	NA	NA	NA	NA	NA	NA	9.33333	8.38842
DR_001866-RA	AA2	L-ascorbate oxidase [Marssonina brunnea multigermtubi MB_m1]	F:peroxidase activity; P:response to oxidative stress; F:metal ion binding; F:oxidoreductase activity; C:membrane; C:integral component of membrane; P:cellular oxidant detoxification; P:oxidation-reduction process; F:heme binding	0	IPR002016 (PFAM); G3DSA:1.10.520.10 (GENE3D); PTHR31356:SF4 (PANTHER); PTHR31356 (PANTHER); IPR002016 (PROSITE_PROFILES); IPR010255 (SUPERFAMILY)	NA	NA	NA	NA	8.35231	2.33333	31	29.359
DR_001866-RA	CBM34	L-ascorbate oxidase [Marssonina brunnea multigermtubi MB_m1]	F:peroxidase activity; P:response to oxidative stress; F:metal ion binding; F:oxidoreductase activity; C:membrane; C:integral component of membrane; P:cellular oxidant detoxification; P:oxidation-reduction process; F:heme binding	0	IPR002016 (PFAM); G3DSA:1.10.520.10 (GENE3D); PTHR31356:SF4 (PANTHER); PTHR31356 (PANTHER); IPR002016 (PROSITE_PROFILES); IPR010255 (SUPERFAMILY)	NA	NA	NA	NA	8.35231	2.33333	31	29.359
DR_001870-RA	GT22	Alg9-like mannosyltransferase [Marssonina brunnea multigermtubi MB_m1]	F:mannosyltransferase activity; P:mannosylation; C:integral component of membrane; C:endoplasmic reticulum	EC:2.4.1	IPR005599 (PFAM); PTHR22760:SF2 (PANTHER); IPR005599 (PANTHER)	NA	NA	NA	NA	30.7499	3.33333	18	9.59592
DR_001932-RA	GH47	glycosyl hydrolase family 47 [Marssonina brunnea multigermtubi MB_m1]	F:organic cyclic compound binding; F:heterocyclic compound binding; P:glycoprotein ERAD pathway; F:calcium ion binding; P:N-glycan processing; C:integral component of membrane; F:mannosyl-oligosaccharide 1,2-alpha-mannosidase activity; P:protein deglycosylation involved in glycoprotein catabolic process; C:endoplasmic reticulum; P:ER-associated ubiquitin-dependent protein catabolic process	EC:3.2.1.113	IPR001382 (PRINTS); IPR001382 (G3DSA:1.50.10.GENE3D); IPR001382 (PFAM); PTHR11742:SF7 (PANTHER); PTHR11742 (PANTHER); IPR001382 (SUPERFAMILY)	NA	NA	33.5264	1	22.726	6.33333	43.3333	30.0986
DR_001942-RA	GT21	capsule polysaccharide synthase [Marssonina brunnea multigermtubi MB_m1]	C:membrane	0	IPR029044 (G3DSA:3.90.550.GENE3D); PF13641 (PFAM); PTHR10587 (PANTHER); PTHR10587:SF1 (PANTHER); IPR029044 (SUPERFAMILY)	NA	NA	NA	NA	NA	NA	NA	NA
DR_001961-RA	GT57	dolichyl pyrophosphate Glc1Man9 c2 alpha-1,3-glucosyltransferase	C:endoplasmic reticulum membrane; F:transferase activity, transferring hexosyl groups; C:integral component of membrane	0	IPR004856 (PFAM); IPR004856 (PANTHER); PTHR12413:SF2 (PANTHER)	98.203	0.666667	NA	NA	34.4106	7	13	12.1972
DR_002033-RA	GH20	glycoside hydrolase family 20	P:carbohydrate metabolic process; F:beta-N-acetylhexosaminidase activity	EC:3.2.1.52	IPR025705 (PRINTS); IPR025705 (PIRSF); IPR015883 (PFAM); IPR029018 (G3DSA:3.30.379.GENE3D); IPR029019 (PFAM); IPR013781 (G3DSA:3.20.20.GENE3D); PTHR22600:SF0 (PANTHER); PTHR22600:SF0 (PANTHER); PTHR22600 (PANTHER); PTHR22600 (PANTHER); IPR029018 (SUPERFAMILY); IPR017853 (SUPERFAMILY)	NA	NA	NA	NA	NA	NA	8.33333	5.63625
DR_002046-RA	CE10	alpha beta-Hydrolase [Glarea lozoyensis ATCC 20868]	P:metabolic process; F:hydrolase activity	0	IPR013094 (PFAM); IPR029058 (G3DSA:3.40.50.GENE3D); PTHR23024:SF203 (PANTHER); PTHR23024 (PANTHER); IPR029058 (SUPERFAMILY)	NA	NA	NA	NA	NA	NA	4	1.54053
DR_002083-RA	AA5	kelch domain-containing	0	0	IPR006652 (SMART); IPR003609 (PFAM); IPR015916 (G3DSA:2.130.10.GENE3D); PTHR32208:SF31 (PANTHER); PTHR32208 (PANTHER); IPR003609 (PROSITE_PROFILES); IPR011043 (SUPERFAMILY); SSF57414 (SUPERFAMILY)	157.683	1.33333	NA	NA	NA	NA	5.33333	3.41382
DR_002164-RA	CE16	carbohydrate esterase family 16	F:hydrolase activity, acting on ester bonds	0	IPR013830 (G3DSA:3.40.50.GENE3D); PTHR22835 (PANTHER); PTHR22835:SF53 (PANTHER); IPR013830 (SUPERFAMILY)	NA	NA	55.9657	1.66667	130.079	20.6667	26.6667	27.3637
DR_002168-RA	GT15	WD domain-containing [Marssonina brunnea multigermtubi MB_m1]	P:protein O-linked glycosylation; P:transcription, DNA-templated; P:regulation of transcription, DNA-templated; P:protein N-linked glycosylation; C:Golgi apparatus; F:alpha-1,2-mannosyltransferase activity; C:nucleus; P:cell wall mannoprotein biosynthetic process; F:oxidoreductase activity; P:mannosylation; C:integral component of membrane; C:cytosol; P:oxidation-reduction process	EC:2.4.1	IPR029044 (G3DSA:3.90.550.GENE3D); IPR002685 (PFAM); PTHR31121:SF7 (PANTHER); IPR002685 (PANTHER); IPR029044 (SUPERFAMILY)	NA	NA	NA	NA	2.37945	0.666667	NA	NA
DR_002206-RA	GH125	DUF1237 domain-containing	F:catalytic activity	0	IPR012341 (G3DSA:1.50.10.GENE3D); IPR008313 (PFAM); PTHR31047:SF2 (PANTHER); PTHR31047 (PANTHER); IPR008928 (SUPERFAMILY)	142.089	1.33333	162.293	3.66667	106.844	24.6667	61.3333	43.5593
DR_002252-RA	CE7	alpha beta-hydrolase [Phialocephala scopiformis]	C:integral component of membrane; F:glycylpeptide N-tetradecanoyltransferase activity; P:N-terminal protein myristoylation; F:hydrolase activity	EC:2.3.1.97	IPR029058 (G3DSA:3.40.50.GENE3D); IPR000073 (PFAM); PTHR12277 (PANTHER); PTHR12277:SF50 (PANTHER); IPR029058 (SUPERFAMILY)	NA	NA	NA	NA	NA	NA	9.66667	7.0211
DR_002254-RA	CE1	alpha beta-hydrolase [Phialocephala scopiformis]	F:oxidoreductase activity; P:metabolic process; F:transferase activity; F:hydrolase activity	0	IPR029058 (G3DSA:3.40.50.GENE3D); IPR029058 (SUPERFAMILY)	NA	NA	NA	NA	28.2735	2.66667	22	24.3839
DR_002255-RA	GH78	alpha-L-rhamnosidase [Marssonina brunnea multigermtubi MB_m1]	F:hydrolase activity	0	IPR008979 (G3DSA:2.60.120.GENE3D); IPR008979 (G3DSA:2.60.120.GENE3D); IPR008902 (PFAM); IPR013737 (PFAM); PTHR33307 (PANTHER); PTHR33307:SF5 (PANTHER); IPR000909 (PROSITE_PROFILES); IPR008979 (SUPERFAMILY); IPR008928 (SUPERFAMILY)	NA	NA	140.081	3	11.8973	3.33333	19.6667	13.1716
DR_002255-RA	CBM67	alpha-L-rhamnosidase [Marssonina brunnea multigermtubi MB_m1]	F:hydrolase activity	0	IPR008979 (G3DSA:2.60.120.GENE3D); IPR008979 (G3DSA:2.60.120.GENE3D); IPR008902 (PFAM); IPR013737 (PFAM); PTHR33307 (PANTHER); PTHR33307:SF5 (PANTHER); IPR000909 (PROSITE_PROFILES); IPR008979 (SUPERFAMILY); IPR008928 (SUPERFAMILY)	NA	NA	140.081	3	11.8973	3.33333	19.6667	13.1716
DR_002279-RA	GT3	glycogen synthase	P:glycogen biosynthetic process; F:glycogen (starch) synthase activity	EC:2.4.1.11	IPR008631 (PFAM); PTHR10176:SF3 (PANTHER); IPR008631 (PANTHER); SSF53756 (SUPERFAMILY); SSF53756 (SUPERFAMILY)	NA	NA	NA	NA	NA	NA	78.6667	48.6583
DR_002292-RA	AA7	FAD binding domain-containing	F:oxidoreductase activity; F:binding	0	IPR016169 (G3DSA:3.30.465.GENE3D); IPR006094 (PFAM); PTHR11748:SF88 (PANTHER); PTHR11748 (PANTHER); IPR016166 (PROSITE_PROFILES); IPR016166 (SUPERFAMILY)	NA	NA	NA	NA	NA	NA	NA	NA
DR_002322-RA	GH18	class III chitinase [Purpureocillium lilacinum]	F:hydrolase activity	0	IPR013781 (G3DSA:3.20.20.GENE3D); IPR001223 (PFAM); PTHR11177:SF185 (PANTHER); PTHR11177 (PANTHER); IPR017853 (SUPERFAMILY)	NA	NA	NA	NA	NA	NA	2	1.69318
DR_002361-RA	CE10	alpha beta-hydrolase	P:metabolic process; C:integral component of membrane; F:hydrolase activity	0	IPR029058 (G3DSA:3.40.50.GENE3D); IPR013094 (PFAM); PTHR23024 (PANTHER); PTHR23024:SF102 (PANTHER); IPR029058 (SUPERFAMILY)	NA	NA	NA	NA	NA	NA	8.66667	9.42109
DR_002383-RA	AA2	cytochrome c peroxidase	F:peroxidase activity; P:response to oxidative stress; F:metal ion binding; P:cellular oxidant detoxification; P:oxidation-reduction process; F:heme binding	EC:1.11.1.7	IPR002016 (PRINTS); IPR002207 (PRINTS); IPR002016 (PFAM); G3DSA:1.10.520.10 (GENE3D); G3DSA:1.10.420.10 (GENE3D); PTHR31356 (PANTHER); PTHR31356:SF3 (PANTHER); IPR002016 (PROSITE_PROFILES); IPR010255 (SUPERFAMILY)	142.089	1.33333	67.1664	2	50.5929	6.33333	3	3.59943
DR_002419-RA	CE1	homoserine O-acetyltransferase	F:homoserine O-acetyltransferase activity; P:methionine biosynthetic process; C:cytoplasm; F:serine O-acetyltransferase activity; C:integral component of membrane; P:cysteine biosynthetic process; P:transport; F:hydrolase activity	EC:2.3.1.30; EC:2.3.1.31	IPR008220 (TIGRFAM); IPR029058 (G3DSA:3.40.50.GENE3D); IPR008220 (PIRSF); IPR000073 (PFAM); PTHR10992:SF756 (PANTHER); PTHR10992 (PANTHER); IPR029058 (SUPERFAMILY)	NA	NA	NA	NA	NA	NA	6.33333	6.84526
DR_002501-RA	AA3	long chain fatty alcohol oxidase	F:nucleotide binding; F:ATP binding; F:oxidoreductase activity, acting on CH-OH group of donors; F:oxidoreductase activity; F:flavin adenine dinucleotide binding; P:oxidation-reduction process	0	IPR003953 (PFAM); IPR023753 (G3DSA:3.50.50.GENE3D); PTHR11552 (PANTHER); PTHR11552:SF92 (PANTHER); IPR023753 (SUPERFAMILY)	NA	NA	NA	NA	NA	NA	22.6667	15.9977
DR_002551-RA	GH1	glycosyl hydrolase family 1 [Marssonina brunnea multigermtubi MB_m1]	P:carbohydrate metabolic process; F:hydrolase activity, hydrolyzing O-glycosyl compounds	0	IPR001360 (PRINTS); IPR001360 (PFAM); IPR013781 (G3DSA:3.20.20.GENE3D); PTHR10353:SF67 (PANTHER); IPR001360 (PANTHER); IPR017853 (SUPERFAMILY)	NA	NA	NA	NA	18.9387	5.33333	4.33333	4.33984
DR_002560-RA	GT8	LPXTG-motif cell wall anchor domain [Marssonina brunnea multigermtubi MB_m1]	F:transferase activity	0	IPR029044 (G3DSA:3.90.550.GENE3D); IPR029044 (SUPERFAMILY)	142.089	1.33333	285.236	7.33333	452.901	103.333	126.333	96.2505
DR_002572-RA	PL1	Pc22g24890 [Penicillium rubens Wisconsin 54-1255]	P:pectin catabolic process; F:fibrinogen binding; F:metal ion binding; F:pectate lyase activity; P:cell wall organization; C:extracellular region	EC:4.2.2.2	IPR012334 (G3DSA:2.160.20.GENE3D); IPR002022 (PFAM); PTHR31683:SF6 (PANTHER); PTHR31683 (PANTHER); IPR011050 (SUPERFAMILY)	NA	NA	NA	NA	NA	NA	NA	NA
DR_002576-RA	AA11	RNA polymerase Rpb1 repeat domain-containing [Purpureocillium lilacinum]	F:chitin binding; F:carbohydrate binding	0	IPR001002 (G3DSA:3.30.60.GENE3D); PTHR36182 (PANTHER); PTHR36182:SF1 (PANTHER); IPR001002 (PROSITE_PROFILES); IPR001002 (SUPERFAMILY)	NA	NA	NA	NA	NA	NA	NA	NA
DR_002576-RA	CBM18	RNA polymerase Rpb1 repeat domain-containing [Purpureocillium lilacinum]	F:chitin binding; F:carbohydrate binding	0	IPR001002 (G3DSA:3.30.60.GENE3D); PTHR36182 (PANTHER); PTHR36182:SF1 (PANTHER); IPR001002 (PROSITE_PROFILES); IPR001002 (SUPERFAMILY)	NA	NA	NA	NA	NA	NA	NA	NA
DR_002586-RA	GH5	cellulase [Marssonina brunnea multigermtubi MB_m1]	P:carbohydrate metabolic process; F:oxidoreductase activity, acting on CH-OH group of donors; F:flavin adenine dinucleotide binding; P:oxidation-reduction process; F:hydrolase activity, hydrolyzing O-glycosyl compounds	0	IPR001547 (PFAM); IPR013781 (G3DSA:3.20.20.GENE3D); PTHR31451 (PANTHER); IPR017853 (SUPERFAMILY)	NA	NA	195.819	4.66667	74.0779	10.3333	25.6667	23.8952
DR_002606-RA	GH78	bacterial alpha-L-rhamnosidase domain [Marssonina brunnea multigermtubi MB_m1]	F:catalytic activity	0	PTHR34987 (PANTHER); PTHR34987:SF1 (PANTHER); IPR008928 (SUPERFAMILY)	NA	NA	NA	NA	NA	NA	4.66667	2.68638
DR_002624-RA	GT50	glycosyltransferase family 50	P:GPI anchor biosynthetic process; F:transferase activity, transferring hexosyl groups; C:integral component of membrane	0	IPR007704 (PFAM); PTHR12886:SF0 (PANTHER); IPR007704 (PANTHER)	NA	NA	NA	NA	NA	NA	3	3.40045
DR_002689-RA	GH17	beta-glucosidase [Marssonina brunnea multigermtubi MB_m1]	P:carbohydrate metabolic process; F:hydrolase activity	0	IPR013781 (G3DSA:3.20.20.GENE3D); PTHR16631 (PANTHER); PTHR16631:SF15 (PANTHER); IPR017853 (SUPERFAMILY)	NA	NA	NA	NA	NA	NA	NA	NA
DR_002717-RA	GH38	glycosyl hydrolase family 38	P:protein deglycosylation; F:alpha-mannosidase activity; F:zinc ion binding; C:fungal-type vacuole membrane; P:mannose metabolic process; F:carbohydrate binding	EC:3.2.1.24	IPR015341 (SMART); IPR015341 (G3DSA:1.20.1270.GENE3D); IPR027291 (G3DSA:3.20.110.GENE3D); IPR000602 (PFAM); IPR015341 (PFAM); PTHR11607 (PANTHER); PTHR11607:SF15 (PANTHER); IPR011330 (SUPERFAMILY); IPR028995 (SUPERFAMILY)	NA	NA	67.0906	2	42.4908	12	53	30.8726
DR_002797-RA	PL3	pectate lyase [Marssonina brunnea multigermtubi MB_m1]	F:pectate lyase activity; F:lyase activity; C:extracellular region	0	IPR012334 (G3DSA:2.160.20.GENE3D); IPR004898 (PFAM); PTHR33407 (PANTHER); PTHR33407:SF7 (PANTHER); IPR011050 (SUPERFAMILY)	NA	NA	766.897	19.3333	10.7802	3	4	4.91685
DR_002799-RA	GT4	glycosyl transferase [Marssonina brunnea multigermtubi MB_m1]	C:integral component of membrane; F:transferase activity	0	no IPS match	251.803	3	55.852	1.66667	13.0627	3.66667	137	58.9956
DR_002806-RA	AA8	FAD NAD(P)-binding [Glarea lozoyensis ATCC 20868]	F:oxidoreductase activity; P:metabolic process; F:polysaccharide binding	0	G3DSA:3.30.410.10 (GENE3D); IPR000172 (PFAM); IPR023753 (G3DSA:3.50.50.GENE3D); PTHR11552 (PANTHER); PTHR11552:SF110 (PANTHER); SSF54373 (SUPERFAMILY); IPR023753 (SUPERFAMILY)	NA	NA	106.479	2	239.587	38.3333	158.333	124.931
DR_002819-RA	GT66	dolichyl-diphosphooligosaccharide- glycosyltransferase	C:mitochondrial proton-transporting ATP synthase complex, coupling factor F(o); C:oligosaccharyltransferase complex; F:hydrogen ion transmembrane transporter activity; C:integral component of membrane; P:protein N-linked glycosylation; P:ATP synthesis coupled proton transport; F:oligosaccharyl transferase activity	EC:2.4.1	IPR003674 (PFAM); PTHR13872:SF1 (PANTHER); PTHR13872 (PANTHER)	NA	NA	72.9146	1	43.6672	7	115.667	55.1199
DR_002823-RA	GT69	polysaccharide export	C:membrane; C:integral component of membrane; F:transferase activity	0	no IPS match	NA	NA	NA	NA	2.37945	0.666667	7.66667	7.58057
DR_002851-RA	GH5	glycosyl hydrolase family 5 cellulase [Marssonina brunnea multigermtubi MB_m1]	P:metabolic process; F:hydrolase activity, hydrolyzing O-glycosyl compounds	0	IPR001547 (PFAM); IPR013781 (G3DSA:3.20.20.GENE3D); PTHR31263 (PANTHER); PTHR31263:SF11 (PANTHER); IPR017853 (SUPERFAMILY)	NA	NA	168.117	2.66667	95.1218	18.6667	91.6667	83.4807
DR_002863-RA	CE10	alpha beta-hydrolase [Phialocephala scopiformis]	F:protein-histidine N-methyltransferase activity; F:organic cyclic compound binding; F:heterocyclic compound binding; C:cytosol; P:peptidyl-histidine methylation, to form tele-methylhistidine	EC:2.1.1.85	IPR013094 (PFAM); IPR029058 (G3DSA:3.40.50.GENE3D); PTHR23024 (PANTHER); PTHR23024:SF166 (PANTHER); IPR029058 (SUPERFAMILY)	142.089	1.33333	44.6892	1.33333	17.7059	2.33333	22	16.7629
DR_002882-RA	CE5	cutinase [Marssonina brunnea multigermtubi MB_m1]	P:metabolic process; C:extracellular region; F:cutinase activity	EC:3.1.1.74	IPR000675 (SMART); IPR000675 (PFAM); IPR029058 (G3DSA:3.40.50.GENE3D); PTHR15087:SF14 (PANTHER); PTHR15087 (PANTHER); IPR029058 (SUPERFAMILY)	NA	NA	72.8767	1	NA	NA	NA	NA
DR_002885-RA	AA3	alcohol oxidase	F:flavin adenine dinucleotide binding; P:oxidation-reduction process; F:choline dehydrogenase activity	EC:1.1.99.1	PTHR11552:SF119 (PANTHER); PTHR11552 (PANTHER)	NA	NA	NA	NA	70.6111	6.66667	24.3333	12.8048
DR_002896-RA	CE10	extracellular lipase	C:integral component of membrane; F:hydrolase activity	0	IPR002018 (PFAM); IPR029058 (G3DSA:3.40.50.GENE3D); PTHR11559 (PANTHER); PTHR11559:SF240 (PANTHER); IPR029058 (SUPERFAMILY)	NA	NA	NA	NA	NA	NA	NA	NA
DR_002919-RA	GH13	alpha-glucosidase [Verticillium dahliae ]	P:carbohydrate metabolic process; F:alpha-glucosidase activity; C:intracellular part; P:cellular metabolic process	0	IPR006047 (SMART); G3DSA:3.90.400.10 (GENE3D); IPR006047 (PFAM); IPR013781 (G3DSA:3.20.20.GENE3D); IPR015902 (PANTHER); PTHR10357:SF142 (PANTHER); IPR017853 (SUPERFAMILY)	NA	NA	638.797	12	972.446	187	657.333	468.706
DR_002926-RA	GT20	trehalose-6-phosphate synthase [Marssonina brunnea multigermtubi MB_m1]	P:ascospore formation; P:establishment of turgor in appressorium; C:alpha,alpha-trehalose-phosphate synthase complex (UDP-forming); F:alpha,alpha-trehalose-phosphate synthase (UDP-forming) activity; P:trehalose biosynthesis in response to heat stress; C:cytosol; P:regulation of gluconeogenesis	EC:2.4.1.15	IPR001830 (PFAM); G3DSA:3.40.50.2000 (GENE3D); PTHR10788:SF6 (PANTHER); PTHR10788 (PANTHER); SSF53756 (SUPERFAMILY)	NA	NA	NA	NA	21.1539	3.33333	36	30.2227
DR_002929-RA	GH5	glycoside hydrolase family 5	P:carbohydrate metabolic process; F:hydrolase activity, hydrolyzing O-glycosyl compounds	0	IPR013781 (G3DSA:3.20.20.GENE3D); PTHR31308 (PANTHER); PTHR31308:SF2 (PANTHER); IPR017853 (SUPERFAMILY)	NA	NA	NA	NA	NA	NA	25	15.5739
DR_002960-RA	GT24	UDP-glucose:Glyco Glucosyltransferase	P:UDP-glucosylation; P:protein glycosylation; F:UDP-glucose:glycoprotein glucosyltransferase activity	EC:2.4.1	IPR009448 (PFAM); IPR029044 (G3DSA:3.90.550.GENE3D); IPR009448 (PANTHER); PTHR11226:SF0 (PANTHER); IPR029044 (SUPERFAMILY)	NA	NA	NA	NA	14.2767	4	40.3333	21.2864
DR_002968-RA	GT1	UDP-glucosyl transferase family	F:transferase activity	0	IPR002213 (PFAM); G3DSA:3.40.50.2000 (GENE3D); G3DSA:3.40.50.2000 (GENE3D); IPR002213 (PANTHER); SSF53756 (SUPERFAMILY)	308.842	2.33333	NA	NA	NA	NA	5	4.40508
DR_002979-RA	GH28	polygalacturonase partial	P:pectin catabolic process; C:cell wall; F:aspartyl esterase activity; F:polygalacturonase activity; C:extracellular region; P:cell wall modification; F:pectinesterase activity	EC:3.1.1.11; EC:3.2.1.15	IPR012334 (G3DSA:2.160.20.GENE3D); IPR000743 (PFAM); PTHR31884 (PANTHER); PTHR31884:SF9 (PANTHER); IPR011050 (SUPERFAMILY)	NA	NA	NA	NA	3.54494	1	10.3333	11.2222
DR_002987-RA	GT4	glycosyl group 1 family	C:integral component of membrane; F:transferase activity	0	G3DSA:3.40.50.2000 (GENE3D); IPR001296 (PFAM); PTHR12526 (PANTHER); PTHR12526 (PANTHER); PTHR12526:SF393 (PANTHER); PTHR12526 (PANTHER); PTHR12526:SF393 (PANTHER); PTHR12526:SF393 (PANTHER); PTHR12526:SF393 (PANTHER); PTHR12526:SF393 (PANTHER); PTHR12526 (PANTHER); SSF53756 (SUPERFAMILY)	NA	NA	NA	NA	2.37945	0.666667	28.6667	12.1263
DR_002988-RA	GH135	spherulin 4-like cell surface	C:integral component of membrane	0	IPR021986 (PFAM); PTHR35040 (PANTHER); PTHR35040:SF2 (PANTHER)	NA	NA	NA	NA	NA	NA	NA	NA
DR_003002-RA	GT1	2-amino-3-carboxymuconate-6-semialdehyde decarboxylase	F:hydrolase activity	0	G3DSA:3.40.50.2000 (GENE3D); IPR002213 (PFAM); G3DSA:3.40.50.2000 (GENE3D); IPR002213 (PANTHER); SSF53756 (SUPERFAMILY)	270.12	2.33333	NA	NA	3.54494	1	25.6667	14.1752
DR_003010-RA	GT24	UDP-glucose:Glyco Glucosyltransferase	P:UDP-glucosylation; P:protein glycosylation; F:UDP-glucose:glycoprotein glucosyltransferase activity	EC:2.4.1	IPR009448 (PFAM); IPR029044 (G3DSA:3.90.550.GENE3D); PTHR11226:SF0 (PANTHER); IPR009448 (PANTHER); IPR029044 (SUPERFAMILY)	NA	NA	33.5264	1	29.9128	8.33333	25.3333	13.8715
DR_003041-RA	GH5	glycoside hydrolase family 5	P:carbohydrate metabolic process; F:hydrolase activity, hydrolyzing O-glycosyl compounds	0	IPR013781 (G3DSA:3.20.20.GENE3D); PTHR31308 (PANTHER); PTHR31308:SF2 (PANTHER); IPR017853 (SUPERFAMILY); IPR017853 (SUPERFAMILY)	NA	NA	NA	NA	7.2353	2	32.6667	23.7169
DR_003044-RA	GT20	trehalose-6-phosphate synthase [Marssonina brunnea multigermtubi MB_m1]	P:ascospore formation; C:alpha,alpha-trehalose-phosphate synthase complex (UDP-forming); F:alpha,alpha-trehalose-phosphate synthase (UDP-forming) activity; P:trehalose biosynthesis in response to heat stress; C:cytosol	EC:2.4.1.15	G3DSA:3.40.50.2000 (GENE3D); G3DSA:3.40.50.2000 (GENE3D); IPR001830 (PFAM); PTHR10788 (PANTHER); PTHR10788:SF6 (PANTHER); SSF53756 (SUPERFAMILY)	NA	NA	44.6892	1.33333	50.8728	11.6667	73.6667	54.0345
DR_003051-RA	GH13	Glycoside superfamily [Penicillium expansum]	P:carbohydrate metabolic process; F:alpha-glucosidase activity; C:intracellular part; P:cellular metabolic process	0	IPR006047 (SMART); IPR006047 (PFAM); G3DSA:3.90.400.10 (GENE3D); IPR013781 (G3DSA:3.20.20.GENE3D); PTHR10357:SF142 (PANTHER); IPR015902 (PANTHER); IPR017853 (SUPERFAMILY)	NA	NA	1578.22	40	1849.81	403	1029.67	761.997
DR_003073-RA	CE10	extracellular lipase	C:integral component of membrane; F:hydrolase activity	0	IPR002018 (PFAM); IPR029058 (G3DSA:3.40.50.GENE3D); PTHR11559 (PANTHER); PTHR11559:SF240 (PANTHER); PTHR11559:SF240 (PANTHER); IPR029058 (SUPERFAMILY)	NA	NA	NA	NA	2.37945	0.666667	3.66667	2.61843
DR_003096-RA	GT31	glycosyltransferase family 31	F:transferase activity, transferring glycosyl groups; C:membrane	0	IPR003378 (PFAM); PTHR23033:SF18 (PANTHER); PTHR23033 (PANTHER)	NA	NA	NA	NA	22.2709	3.66667	13	10.0136
DR_003097-RA	AA9	endoglucanase II [Marssonina brunnea multigermtubi MB_m1]	P:carbohydrate metabolic process; C:extracellular region; F:hydrolase activity, hydrolyzing O-glycosyl compounds; F:cellulose binding	0	IPR005103 (PFAM); PTHR33353:SF1 (PANTHER); PTHR33353 (PANTHER)	NA	NA	NA	NA	NA	NA	NA	NA
DR_003107-RA	CE4	carbohydrate esterase family 4	C:membrane; F:hydrolase activity	0	IPR002509 (G3DSA:3.20.20.GENE3D); IPR002509 (PFAM); PTHR10587 (PANTHER); PTHR10587:SF83 (PANTHER); IPR002509 (PROSITE_PROFILES); IPR011330 (SUPERFAMILY)	NA	NA	NA	NA	5.97286	1.66667	11.6667	15.1739
DR_003138-RA	GT1	UDP-Glycosyltransferase glycogen phosphorylase [Phialocephala scopiformis]	P:fungal-type cell wall organization; P:carbohydrate metabolic process; P:flavonoid glucuronidation; C:intracellular membrane-bounded organelle; F:sterol 3-beta-glucosyltransferase activity; P:flavonoid biosynthetic process; P:lipid glycosylation	EC:2.4.1.173	IPR004276 (PFAM); G3DSA:3.40.50.2000 (GENE3D); IPR002213 (PANTHER); PTHR11926:SF364 (PANTHER); SSF53756 (SUPERFAMILY)	NA	NA	NA	NA	NA	NA	16.3333	9.3918
DR_003149-RA	GH72	1,3-beta-glucanosyltransferase gel4 [Marssonina brunnea multigermtubi MB_m1]	F:hydrolase activity, acting on ester bonds; C:primary cell septum; F:1,3-beta-glucanosyltransferase activity; P:chromatin silencing; C:plasma membrane; C:cellular bud scar; P:fungal-type cell wall organization; P:carbohydrate metabolic process; P:filamentous growth; C:mitochondrion; C:membrane raft; C:integral component of membrane; C:ER to Golgi transport vesicle; C:nuclear periphery; C:anchore…	0	IPR012946 (SMART); IPR004886 (PFAM); IPR013781 (G3DSA:3.20.20.GENE3D); IPR012946 (PFAM); PTHR31468 (PANTHER); PTHR31468:SF2 (PANTHER); IPR017853 (SUPERFAMILY)	NA	NA	NA	NA	NA	NA	NA	NA
DR_003149-RA	CBM43	1,3-beta-glucanosyltransferase gel4 [Marssonina brunnea multigermtubi MB_m1]	F:hydrolase activity, acting on ester bonds; C:primary cell septum; F:1,3-beta-glucanosyltransferase activity; P:chromatin silencing; C:plasma membrane; C:cellular bud scar; P:fungal-type cell wall organization; P:carbohydrate metabolic process; P:filamentous growth; C:mitochondrion; C:membrane raft; C:integral component of membrane; C:ER to Golgi transport vesicle; C:nuclear periphery; C:anchore…	0	IPR012946 (SMART); IPR004886 (PFAM); IPR013781 (G3DSA:3.20.20.GENE3D); IPR012946 (PFAM); PTHR31468 (PANTHER); PTHR31468:SF2 (PANTHER); IPR017853 (SUPERFAMILY)	NA	NA	NA	NA	NA	NA	NA	NA
DR_003157-RA	GH5	glycoside hydrolase family 5	P:glucan catabolic process; F:glucan exo-1,3-beta-glucosidase activity; C:fungal-type cell wall; C:barrier septum; P:fungal-type cell wall disassembly involved in conjugation with cellular fusion; C:integral component of membrane; F:glucan endo-1,6-beta-glucosidase activity; C:extracellular region; P:fungal-type cell wall beta-glucan metabolic process; C:cell surface; C:actin fusion focus	EC:3.2.1.75; EC:3.2.1.58	IPR013781 (G3DSA:3.20.20.GENE3D); IPR001547 (PFAM); PTHR31297 (PANTHER); PTHR31297:SF8 (PANTHER); PTHR31297:SF8 (PANTHER); IPR017853 (SUPERFAMILY)	NA	NA	NA	NA	3.54494	1	10.6667	10.4342
DR_003180-RA	CE16	Transcription fungi [Penicillium expansum]	F:hydrolase activity	0	IPR013830 (G3DSA:3.40.50.GENE3D); PTHR22835 (PANTHER); PTHR22835:SF113 (PANTHER); IPR013830 (SUPERFAMILY)	NA	NA	NA	NA	NA	NA	NA	NA
DR_003191-RA	AA9	glycoside hydrolase family 61	F:hydrolase activity	0	IPR005103 (PFAM)	NA	NA	NA	NA	NA	NA	3.66667	1.8573
DR_003193-RA	GT2	glycosyltransferase family 2	C:integral component of membrane; F:transferase activity	0	PF13641 (PFAM); IPR029044 (G3DSA:3.90.550.GENE3D); PTHR10587:SF1 (PANTHER); PTHR10587 (PANTHER); IPR029044 (SUPERFAMILY)	NA	NA	NA	NA	NA	NA	2.66667	2.28454
DR_003196-RA	GH2	glycoside hydrolase family 2	F:beta-mannosidase activity; P:carbohydrate metabolic process; C:intracellular membrane-bounded organelle	EC:3.2.1.25	IPR013781 (G3DSA:3.20.20.GENE3D); PTHR10066 (PANTHER); PTHR10066:SF68 (PANTHER); IPR006102 (SUPERFAMILY); IPR017853 (SUPERFAMILY)	NA	NA	NA	NA	NA	NA	4	2.04356
DR_003203-RA	CE3	carbohydrate esterase family 3	F:lysophospholipase activity; C:membrane; C:integral component of membrane; F:hydrolase activity	0	IPR013830 (PFAM); IPR013830 (G3DSA:3.40.50.GENE3D); PTHR30383 (PANTHER); PTHR30383:SF4 (PANTHER); IPR013830 (SUPERFAMILY)	NA	NA	NA	NA	NA	NA	NA	NA
DR_003205-RA	GH64	glucanase B [Marssonina brunnea multigermtubi MB_m1]	F:hydrolase activity	0	IPR032477 (PFAM); PTHR38165 (PANTHER); PTHR38165:SF1 (PANTHER)	NA	NA	NA	NA	10.7802	3	11	10.9949
DR_003207-RA	AA4	D-lactate dehydrogenase (cytochrome) [Marssonina brunnea multigermtubi MB_m1]	F:D-lactate dehydrogenase (cytochrome) activity; F:flavin adenine dinucleotide binding; P:cellular carbohydrate metabolic process; C:integral component of membrane; P:aerobic respiration; C:mitochondrial inner membrane	EC:1.1.2.4	IPR016169 (G3DSA:3.30.465.GENE3D); IPR006094 (PFAM); IPR016167 (G3DSA:3.30.43.GENE3D); IPR004113 (PFAM); PTHR11748:SF35 (PANTHER); PTHR11748 (PANTHER); IPR016166 (PROSITE_PROFILES); IPR016164 (SUPERFAMILY); IPR016166 (SUPERFAMILY)	NA	NA	NA	NA	30.8656	6	77.6667	61.4947
DR_003232-RA	GT20	glycosyltransferase family 20	C:integral component of membrane; P:trehalose biosynthetic process; F:transferase activity	0	G3DSA:3.40.50.2000 (GENE3D); IPR001830 (PFAM); G3DSA:3.40.50.2000 (GENE3D); PTHR10788:SF15 (PANTHER); PTHR10788 (PANTHER); SSF53756 (SUPERFAMILY)	NA	NA	NA	NA	NA	NA	41.3333	28.6509
DR_003246-RA	GH133	glycogen debranching enzyme [Marssonina brunnea multigermtubi MB_m1]	P:glycogen biosynthetic process; C:cytoplasm; P:glycogen catabolic process; F:amylo-alpha-1,6-glucosidase activity; F:4-alpha-glucanotransferase activity	EC:2.4.1.25; EC:3.2.1.33	IPR032790 (PFAM); IPR013781 (G3DSA:3.20.20.GENE3D); IPR032788 (PFAM); IPR032792 (PFAM); IPR010401 (PANTHER); PTHR10569:SF2 (PANTHER); IPR008928 (SUPERFAMILY); IPR017853 (SUPERFAMILY)	NA	NA	NA	NA	NA	NA	27.3333	13.4328
DR_003250-RA	AA2	heme peroxidase [Phialocephala scopiformis]	F:peroxidase activity; P:response to oxidative stress; F:oxidoreductase activity; F:metal ion binding; P:cellular oxidant detoxification; P:oxidation-reduction process; F:heme binding	0	no IPS match	NA	NA	NA	NA	NA	NA	4	3.343
DR_003267-RA	GH132	SUN domain-containing [Marssonina brunnea multigermtubi MB_m1]	0	0	IPR005556 (PFAM); PTHR31316 (PANTHER); PTHR31316:SF0 (PANTHER)	NA	NA	NA	NA	NA	NA	58.6667	47.9535
DR_003289-RA	GH43	hydrolase [Verticillium dahliae ]	P:carbohydrate metabolic process; F:hydrolase activity, hydrolyzing O-glycosyl compounds	0	IPR006710 (PFAM); IPR023296 (G3DSA:2.115.10.GENE3D); IPR006710 (PANTHER); PTHR22925:SF12 (PANTHER); IPR023296 (SUPERFAMILY)	NA	NA	NA	NA	2.37945	0.666667	4.33333	5.29693
DR_003290-RA	GH93	BNR Asp-box repeat domain containing [Marssonina brunnea multigermtubi MB_m1]	C:membrane	0	IPR011040 (G3DSA:2.120.10.GENE3D); PTHR38792 (PANTHER); PTHR38792:SF3 (PANTHER); SSF110296 (SUPERFAMILY)	NA	NA	NA	NA	NA	NA	10.6667	9.47675
DR_003335-RA	GH5	exo-beta-1,3-glucanase [Marssonina brunnea multigermtubi MB_m1]	P:glucan catabolic process; C:fungal-type cell wall; C:barrier septum; P:cellular glucan metabolic process; P:fungal-type cell wall disassembly involved in conjugation with cellular fusion; C:integral component of membrane; C:plasma membrane of cell tip; F:beta-glucosidase activity; C:endoplasmic reticulum; C:extracellular region; C:cell surface; C:actin fusion focus	EC:3.2.1.21	IPR013781 (G3DSA:3.20.20.GENE3D); IPR001547 (PFAM); PTHR31297 (PANTHER); PTHR31297:SF1 (PANTHER); IPR017853 (SUPERFAMILY)	NA	NA	NA	NA	NA	NA	1.33333	0.779803
DR_003337-RA	CE10	alpha beta-hydrolase [Phialocephala scopiformis]	P:metabolic process; F:hydrolase activity	0	IPR013094 (PFAM); IPR029058 (G3DSA:3.40.50.GENE3D); PTHR23024:SF47 (PANTHER); PTHR23024 (PANTHER); PTHR23024 (PANTHER); PTHR23024:SF47 (PANTHER); PTHR23024:SF47 (PANTHER); IPR029058 (SUPERFAMILY)	NA	NA	NA	NA	12.947	1	5.33333	2.55013
DR_003354-RA	GH16	glycoside hydrolase family 16	C:cellular bud neck septin ring; P:fungal-type cell wall organization; F:chitin binding; F:transferase activity, transferring glycosyl groups; C:fungal-type cell wall; F:hydrolase activity, hydrolyzing O-glycosyl compounds; P:cell wall chitin metabolic process	0	no IPS match	NA	NA	NA	NA	NA	NA	29.6667	26.9422
DR_003354-RA	CBM18	glycoside hydrolase family 16	C:cellular bud neck septin ring; P:fungal-type cell wall organization; F:chitin binding; F:transferase activity, transferring glycosyl groups; C:fungal-type cell wall; F:hydrolase activity, hydrolyzing O-glycosyl compounds; P:cell wall chitin metabolic process	0	no IPS match	NA	NA	NA	NA	NA	NA	29.6667	26.9422
DR_003358-RA	GH76	glycoside hydrolase family 76	F:hydrolase activity	0	IPR012341 (G3DSA:1.50.10.GENE3D); IPR005198 (PFAM); IPR014480 (PIRSF); PTHR12145 (PANTHER); PTHR12145:SF16 (PANTHER); PTHR12145:SF16 (PANTHER); IPR008928 (SUPERFAMILY)	NA	NA	NA	NA	NA	NA	NA	NA
DR_003364-RA	GT4	glycosyltransferase family 4	F:transferase activity, transferring glycosyl groups; F:oxidoreductase activity; C:integral component of membrane; P:oxidation-reduction process	0	IPR001296 (PFAM); G3DSA:3.40.50.2000 (GENE3D); PTHR12526:SF389 (PANTHER); PTHR12526 (PANTHER); SSF53756 (SUPERFAMILY)	67.1896	0.666667	NA	NA	13.0627	3.66667	10.6667	9.47678
DR_003402-RA	GH72	glycoside hydrolase family 72	P:carbohydrate metabolic process; P:cellular component organization or biogenesis; P:fungal-type cell wall organization or biogenesis; F:transferase activity; C:plasma membrane; C:anchored component of membrane	0	IPR004886 (PFAM); IPR013781 (G3DSA:3.20.20.GENE3D); PTHR31468 (PANTHER); PTHR31468:SF4 (PANTHER); IPR017853 (SUPERFAMILY)	NA	NA	NA	NA	NA	NA	NA	NA
DR_003471-RA	GH15	Glucoamylase P [Marssonina brunnea multigermtubi MB_m1]	F:glucan 1,4-alpha-glucosidase activity; F:starch binding; P:polysaccharide catabolic process	EC:3.2.1.3	IPR000165 (PRINTS); IPR011613 (PFAM); IPR012341 (G3DSA:1.50.10.GENE3D); PTHR31616 (PANTHER); PTHR31616:SF0 (PANTHER); IPR008928 (SUPERFAMILY)	NA	NA	NA	NA	NA	NA	8.66667	4.897
DR_003471-RA	CBM20	Glucoamylase P [Marssonina brunnea multigermtubi MB_m1]	F:glucan 1,4-alpha-glucosidase activity; F:starch binding; P:polysaccharide catabolic process	EC:3.2.1.3	IPR000165 (PRINTS); IPR011613 (PFAM); IPR012341 (G3DSA:1.50.10.GENE3D); PTHR31616 (PANTHER); PTHR31616:SF0 (PANTHER); IPR008928 (SUPERFAMILY)	NA	NA	NA	NA	NA	NA	8.66667	4.897
DR_003527-RA	GH35	beta-galactosidase A [Marssonina brunnea multigermtubi MB_m1]	P:carbohydrate metabolic process; C:vacuole; F:beta-galactosidase activity	EC:3.2.1.23	IPR008979 (G3DSA:2.60.120.GENE3D); IPR025300 (PFAM); IPR008979 (G3DSA:2.60.120.GENE3D); IPR008979 (SUPERFAMILY); IPR008979 (SUPERFAMILY)	NA	NA	NA	NA	11.8973	3.33333	28.3333	16.2048
DR_003551-RA	GH128	G alpha subunit	F:GTP binding; F:G-protein coupled receptor binding; C:heterotrimeric G-protein complex; F:GTPase activity; P:adenylate cyclase-modulating G-protein coupled receptor signaling pathway; F:G-protein beta/gamma-subunit complex binding; F:signal transducer activity	0	IPR002975 (PRINTS); IPR001019 (PRINTS); IPR001019 (SMART); IPR001019 (PFAM); IPR011025 (G3DSA:1.10.400.GENE3D); IPR027417 (G3DSA:3.40.50.GENE3D); PTHR10218:SF121 (PANTHER); IPR001019 (PANTHER); IPR027417 (SUPERFAMILY); IPR011025 (SUPERFAMILY)	NA	NA	NA	NA	NA	NA	8.66667	15.0105
DR_003581-RA	AA9	glycosyl hydrolase family 61	C:cellular_component; F:hydrolase activity	0	no IPS match	NA	NA	369.836	6.33333	56.0195	13	44.6667	50.5621
DR_003599-RA	GH128	(Trans)glycosidase [Glarea lozoyensis ATCC 20868]	P:primary metabolic process; P:organic substance metabolic process	0	IPR024655 (PFAM); IPR013781 (G3DSA:3.20.20.GENE3D); PTHR34154 (PANTHER); PTHR34154:SF3 (PANTHER); IPR017853 (SUPERFAMILY)	NA	NA	NA	NA	NA	NA	NA	NA
DR_003602-RA	AA7	D-arabinono-1,4-lactone oxidase	C:integral component of mitochondrial outer membrane; F:D-arabinono-1,4-lactone oxidase activity; P:dehydro-D-arabinono-1,4-lactone biosynthetic process; F:flavin adenine dinucleotide binding; P:cellular response to oxidative stress; P:oxidation-reduction process	EC:1.1.3.37	IPR006094 (PFAM); IPR016169 (G3DSA:3.30.465.GENE3D); IPR010031 (PIRSF); IPR030654 (TIGRFAM); IPR016167 (G3DSA:3.30.43.GENE3D); IPR007173 (PFAM); PTHR13878:SF63 (PANTHER); PTHR13878 (PANTHER); IPR016166 (PROSITE_PROFILES); IPR016166 (SUPERFAMILY)	NA	NA	61.7517	0.666667	NA	NA	7.33333	5.17225
DR_003627-RA	GT8	nucleotide-diphospho-sugar transferase [Phialocephala scopiformis]	F:transferase activity, transferring glycosyl groups; F:metal ion binding; C:membrane	0	no IPS match	NA	NA	NA	NA	NA	NA	6.66667	5.16903
DR_003644-RA	CBM20	esdC [Marssonina brunnea multigermtubi MB_m1]	P:positive regulation of sexual sporulation resulting in formation of a cellular spore	0	IPR013783 (G3DSA:2.60.40.GENE3D); PTHR40625:SF2 (PANTHER); PTHR40625:SF2 (PANTHER); PTHR40625 (PANTHER); IPR014756 (SUPERFAMILY)	NA	NA	NA	NA	NA	NA	22	25.4241
DR_003649-RA	GH16	glycoside hydrolase family 16	P:carbohydrate metabolic process; F:hydrolase activity, hydrolyzing O-glycosyl compounds	0	IPR013320 (G3DSA:2.60.120.GENE3D); IPR000757 (PFAM); PTHR38121:SF1 (PANTHER); PTHR38121 (PANTHER); IPR000757 (PROSITE_PROFILES); IPR013320 (SUPERFAMILY)	NA	NA	61.7138	0.666667	NA	NA	NA	NA
DR_003706-RA	CE5	cutinase 3 [Phialophora attae]	P:metabolic process; C:extracellular region; F:cutinase activity; F:carboxylic ester hydrolase activity; F:hydrolase activity	0	IPR029058 (G3DSA:3.40.50.GENE3D); IPR000675 (PFAM)	NA	NA	NA	NA	NA	NA	18	23.095
DR_003709-RA	GH16	glycoside hydrolase family 16	P:carbohydrate metabolic process; C:membrane; F:hydrolase activity, hydrolyzing O-glycosyl compounds	0	no IPS match	NA	NA	NA	NA	NA	NA	NA	NA
DR_003723-RA	GH16	glycoside hydrolase family 16	P:carbohydrate metabolic process; F:hydrolase activity, hydrolyzing O-glycosyl compounds	0	IPR013320 (G3DSA:2.60.120.GENE3D); IPR000757 (PFAM); PTHR38121:SF2 (PANTHER); PTHR38121 (PANTHER); IPR000757 (PROSITE_PROFILES); IPR013320 (SUPERFAMILY)	NA	NA	NA	NA	NA	NA	NA	NA
DR_003727-RA	CE10	extracellular lipase	F:carboxylic ester hydrolase activity	EC:3.1.1.1	IPR002018 (PFAM); IPR029058 (G3DSA:3.40.50.GENE3D); PTHR11559 (PANTHER); PTHR11559:SF162 (PANTHER); IPR029058 (SUPERFAMILY)	NA	NA	61.7138	0.666667	31.9529	9	15	12.7506
DR_003744-RA	CE8	pectin methyl esterase [Marssonina brunnea multigermtubi MB_m1]	F:hydrolase activity, acting on ester bonds; P:carbohydrate metabolic process; P:cell wall organization; F:hydrolase activity, acting on glycosyl bonds	0	IPR012334 (G3DSA:2.160.20.GENE3D); IPR000070 (PFAM); PTHR31321 (PANTHER); PTHR31321:SF20 (PANTHER); IPR011050 (SUPERFAMILY)	121.507	0.666667	497.708	13.6667	610.203	108.333	178.333	162.077
DR_003761-RA	GT76	duf409 domain	F:transferase activity	0	IPR007315 (PFAM); PTHR12468:SF2 (PANTHER); IPR007315 (PANTHER)	NA	NA	22.3635	0.666667	NA	NA	4.33333	3.43426
DR_003805-RA	GT21	capsule polysaccharide synthase [Marssonina brunnea multigermtubi MB_m1]	C:membrane	0	PF13641 (PFAM); IPR029044 (G3DSA:3.90.550.GENE3D); PTHR10587:SF1 (PANTHER); PTHR10587 (PANTHER); IPR029044 (SUPERFAMILY)	NA	NA	NA	NA	NA	NA	NA	NA
DR_003816-RA	CBM21	carbohydrate-Binding Module family 21	0	0	IPR005036 (PFAM); PTHR12307 (PANTHER); PTHR12307:SF18 (PANTHER); IPR005036 (PROSITE_PROFILES)	NA	NA	NA	NA	NA	NA	26	15.0145
DR_003835-RA	CE10	esterase lipase	P:metabolic process; F:hydrolase activity	0	IPR013094 (PFAM); IPR029058 (G3DSA:3.40.50.GENE3D); PTHR23024:SF41 (PANTHER); PTHR23024 (PANTHER); IPR029058 (SUPERFAMILY)	NA	NA	NA	NA	NA	NA	3.33333	1.81571
DR_003847-RA	CE3	gdsl-like lipase acylhydrolase	F:lysophospholipase activity; F:hydrolase activity	0	IPR013830 (PFAM); IPR013830 (G3DSA:3.40.50.GENE3D); PTHR30383 (PANTHER); PTHR30383:SF4 (PANTHER); IPR013830 (SUPERFAMILY)	NA	NA	NA	NA	NA	NA	13.6667	17.4786
DR_003880-RA	GH12	xyloglucan-specific endo-beta-1,4-glucanase A	F:hydrolase activity	0	IPR002594 (PFAM); IPR013319 (G3DSA:2.60.120.GENE3D); PTHR34002 (PANTHER); PTHR34002:SF5 (PANTHER); PTHR34002 (PANTHER); PTHR34002:SF5 (PANTHER); IPR013320 (SUPERFAMILY); IPR013320 (SUPERFAMILY)	NA	NA	NA	NA	NA	NA	NA	NA
DR_003885-RA	AA3	glucose oxidase	F:oxidoreductase activity, acting on CH-OH group of donors	0	IPR023753 (G3DSA:3.50.50.GENE3D); G3DSA:3.30.560.10 (GENE3D); IPR007867 (PFAM); PTHR11552 (PANTHER); PTHR11552:SF102 (PANTHER); IPR023753 (SUPERFAMILY); SSF54373 (SUPERFAMILY)	NA	NA	NA	NA	NA	NA	7.33333	5.22845
DR_003904-RA	GT62	mannan polymerase II complex ANP1 subunit	C:integral component of membrane; F:transferase activity	0	PF03452 (PFAM); PTHR24319 (PANTHER); PTHR24319:SF31 (PANTHER); IPR029044 (SUPERFAMILY)	NA	NA	55.8899	1.66667	29.6704	8.33333	30.6667	26.3381
DR_003912-RA	GT4	glycosyltransferase family 4	P:chromatin organization; C:nucleus; P:transcription, DNA-templated; P:regulation of transcription, DNA-templated; F:transferase activity	0	G3DSA:3.40.50.2000 (GENE3D); IPR001296 (PFAM); SSF53756 (SUPERFAMILY)	NA	NA	NA	NA	NA	NA	NA	NA
DR_004036-RA	GH114	secretion pathway Sls2 Rcy1 [Marssonina brunnea multigermtubi MB_m1]	C:cytoplasm; P:vesicle docking; P:exocytosis	0	IPR009976 (PFAM); G3DSA:1.20.1280.50 (GENE3D); IPR001810 (PFAM); PTHR12100:SF1 (PANTHER); IPR009976 (PANTHER); IPR001810 (PROSITE_PROFILES); IPR001810 (SUPERFAMILY)	388.904	3.66667	NA	NA	64.8884	13	155.333	74.9746
DR_004046-RA	CE1	DPP6 N-terminal [Glarea lozoyensis ATCC 20868]	F:peptidase activity	0	IPR002469 (PFAM); IPR029058 (G3DSA:3.40.50.GENE3D); IPR002469 (G3DSA:2.140.10.GENE3D); PTHR11731 (PANTHER); PTHR11731:SF110 (PANTHER); SSF82171 (SUPERFAMILY); IPR029058 (SUPERFAMILY)	NA	NA	671.498	15.3333	495.672	107	382.667	262.004
DR_004049-RA	GT32	alpha-1,6-mannosyltransferase Och1 [Marssonina brunnea multigermtubi MB_m1]	F:transferase activity, transferring glycosyl groups; C:membrane; C:integral component of membrane; F:transferase activity	0	IPR007577 (PFAM); PTHR31834:SF7 (PANTHER); PTHR31834 (PANTHER); IPR029044 (SUPERFAMILY)	NA	NA	44.7271	1.33333	85.3803	18.6667	35	30.4134
DR_004056-RA	GH13	alpha amylase	P:carbohydrate metabolic process; F:hydrolase activity	0	IPR006047 (SMART); IPR013780 (G3DSA:2.60.40.GENE3D); G3DSA:3.90.400.10 (GENE3D); IPR013781 (G3DSA:3.20.20.GENE3D); IPR006047 (PFAM); IPR015902 (PANTHER); PTHR10357:SF136 (PANTHER); IPR015902 (PANTHER); IPR017853 (SUPERFAMILY); SSF51011 (SUPERFAMILY)	NA	NA	184.619	4.33333	159.114	42	190.333	161.13
DR_004087-RA	GH16	glycosyl hydrolase family 16	P:fungal-type cell wall organization; C:incipient cellular bud site; F:transferase activity, transferring glycosyl groups; C:fungal-type cell wall; F:hydrolase activity, hydrolyzing O-glycosyl compounds; F:carbohydrate binding; P:cell wall chitin metabolic process	0	IPR013320 (G3DSA:2.60.120.GENE3D); IPR000757 (PFAM); PTHR10963 (PANTHER); PTHR10963:SF38 (PANTHER); IPR000757 (PROSITE_PROFILES); IPR013320 (SUPERFAMILY)	98.203	0.666667	44.765	1.33333	14.1798	4	11.6667	10.9556
DR_004108-RA	GT8	glucose N-acetyltransferase [Marssonina brunnea multigermtubi MB_m1]	F:acetylglucosaminyltransferase activity; C:integral component of membrane; P:protein N-linked glycosylation; C:Golgi apparatus	EC:2.4.1	IPR029044 (G3DSA:3.90.550.GENE3D); IPR030518 (PTHR11183:PANTHER); PTHR11183 (PANTHER); IPR029044 (SUPERFAMILY)	121.507	0.666667	NA	NA	10.6348	3	5	4.40907
DR_004154-RA	GH128	F5 8 type C domain [Marssonina brunnea multigermtubi MB_m1]	P:carbohydrate metabolic process; F:hydrolase activity, acting on glycosyl bonds	0	IPR013781 (G3DSA:3.20.20.GENE3D); IPR024655 (PFAM); PTHR34154 (PANTHER); PTHR34154:SF2 (PANTHER); IPR017853 (SUPERFAMILY)	NA	NA	NA	NA	NA	NA	NA	NA
DR_004155-RA	PL1	pectate lyase	P:carbohydrate metabolic process; F:lyase activity	0	IPR002022 (SMART); IPR012334 (G3DSA:2.160.20.GENE3D); IPR002022 (PFAM); PTHR31683 (PANTHER); PTHR31683:SF6 (PANTHER); IPR011050 (SUPERFAMILY)	NA	NA	NA	NA	NA	NA	NA	NA
DR_004156-RA	GH72	1,3-beta-glucanosyltransferase gel1	P:fungal-type cell wall organization; C:fungal-type cell wall; P:fungal-type cell wall (1->3)-beta-D-glucan biosynthetic process; C:anchored component of external side of plasma membrane; C:integral component of membrane; F:1,3-beta-glucanosyltransferase activity; F:hydrolase activity, acting on glycosyl bonds	0	IPR013781 (G3DSA:3.20.20.GENE3D); IPR004886 (PFAM); PTHR31468 (PANTHER); PTHR31468:SF5 (PANTHER); IPR017853 (SUPERFAMILY)	NA	NA	NA	NA	NA	NA	56.6667	54.6791
DR_004168-RA	GH72	1,3-beta-glucanosyltransferase gel1 precursor [Marssonina brunnea multigermtubi MB_m1]	P:fungal-type cell wall organization; C:fungal-type cell wall; P:fungal-type cell wall (1->3)-beta-D-glucan biosynthetic process; C:anchored component of external side of plasma membrane; C:integral component of membrane; F:1,3-beta-glucanosyltransferase activity; F:hydrolase activity	0	IPR004886 (PFAM); IPR013781 (G3DSA:3.20.20.GENE3D); PTHR31468 (PANTHER); PTHR31468:SF5 (PANTHER); IPR017853 (SUPERFAMILY)	143.45	1	907.417	17.6667	440.473	86.6667	245	195.743
DR_004170-RA	GT90	capsule associated [Marssonina brunnea multigermtubi MB_m1]	F:transferase activity	0	IPR006598 (SMART); IPR006598 (PFAM); PTHR12203 (PANTHER); PTHR12203 (PANTHER); PTHR12203:SF22 (PANTHER); PTHR12203:SF22 (PANTHER)	NA	NA	44.7271	1.33333	7.2353	2	23.6667	16.0619
DR_004172-RA	GH76	Six-hairpin glycosidase [Glarea lozoyensis ATCC 20868]	F:mannan endo-1,6-alpha-mannosidase activity; P:carbohydrate catabolic process; C:integral component of membrane	EC:3.2.1.101	IPR005198 (PFAM); IPR012341 (G3DSA:1.50.10.GENE3D); PTHR12145 (PANTHER); PTHR12145:SF16 (PANTHER); IPR008928 (SUPERFAMILY)	518.121	4.33333	369.912	6.33333	133.922	29.6667	129.667	80.3231
DR_004214-RA	AA3	gmc oxidoreductase	F:oxidoreductase activity, acting on CH-OH group of donors; F:flavin adenine dinucleotide binding; P:oxidation-reduction process	0	G3DSA:3.30.560.10 (GENE3D); IPR023753 (G3DSA:3.50.50.GENE3D); IPR000172 (PFAM); PTHR11552:SF138 (PANTHER); PTHR11552 (PANTHER); IPR023753 (SUPERFAMILY)	NA	NA	NA	NA	4.7589	1.33333	NA	NA
DR_004229-RA	GH63	glucosidase I [Marssonina brunnea multigermtubi MB_m1]	C:endoplasmic reticulum membrane; P:fungal-type cell wall biogenesis; P:protein N-linked glycosylation; F:mannosyl-oligosaccharide glucosidase activity; P:oligosaccharide metabolic process	EC:3.2.1.106	IPR031631 (PFAM); IPR031335 (PFAM); IPR004888 (PANTHER); IPR004888 (PANTHER); PTHR10412:SF11 (PANTHER); PTHR10412:SF11 (PANTHER); IPR004888 (PANTHER); IPR008928 (SUPERFAMILY)	NA	NA	44.7271	1.33333	27.4176	5	76.3333	42.1481
DR_004233-RA	CE10	polyketide synthase [Marssonina brunnea multigermtubi MB_m1]	F:zinc ion binding; P:small GTPase mediated signal transduction; P:metabolic process; F:guanyl-nucleotide exchange factor activity; F:serine-type peptidase activity; P:regulation of transcription, DNA-templated; P:positive regulation of GTPase activity; C:intracellular; F:RNA polymerase II transcription factor activity, sequence-specific DNA binding; P:regulation of transcription from RNA polymer…	0	IPR029058 (G3DSA:3.40.50.GENE3D); IPR013094 (PFAM); PTHR23024 (PANTHER); IPR029058 (SUPERFAMILY)	NA	NA	NA	NA	NA	NA	8	7.5233
DR_004243-RA	GH3	beta-N-acetylglucosaminidase [Purpureocillium lilacinum]	P:carbohydrate metabolic process; P:peptidoglycan turnover; F:hydrolase activity, hydrolyzing O-glycosyl compounds; F:N-acetyltransferase activity	EC:2.3.1	IPR001764 (G3DSA:3.20.20.GENE3D); IPR001764 (PFAM); PTHR30480:SF6 (PANTHER); PTHR30480 (PANTHER); IPR017853 (SUPERFAMILY)	NA	NA	NA	NA	NA	NA	13.3333	11.9393
DR_004286-RA	PL4	rhamnogalacturonate lyase A	P:carbohydrate metabolic process; F:carbon-oxygen lyase activity, acting on polysaccharides; C:membrane	0	IPR015364 (PFAM); IPR014766 (G3DSA:2.60.40.GENE3D); IPR029413 (PFAM); IPR014718 (G3DSA:2.70.98.GENE3D); IPR008979 (G3DSA:2.60.120.GENE3D); IPR029411 (PFAM); PTHR36574 (PANTHER); PTHR36574:SF1 (PANTHER); IPR008979 (SUPERFAMILY); IPR013784 (SUPERFAMILY); IPR011013 (SUPERFAMILY)	NA	NA	NA	NA	2.37945	0.666667	2	1.55364
DR_004292-RA	GH131	carbohydrate-binding module family 1 [Myceliophthora thermophila ATCC 42464]	P:carbohydrate metabolic process; C:extracellular region; F:hydrolase activity, hydrolyzing O-glycosyl compounds; F:cellulose binding; F:hydrolase activity	0	PTHR34612:SF1 (PANTHER); PTHR34612 (PANTHER)	NA	NA	257.609	5.33333	198.512	34.6667	82.3333	89.1623
DR_004303-RA	GT35	starch phosphorylase	F:glycogen phosphorylase activity; F:pyridoxal phosphate binding; C:cytoplasm; P:glycogen catabolic process	0	no IPS match	NA	NA	NA	NA	13.1112	3.66667	46	28.376
DR_004328-RA	GH18	Endochitinase 1	F:chitinase activity; P:carbohydrate metabolic process; F:transferase activity, transferring glycosyl groups; P:chitin catabolic process	EC:3.2.1.14	IPR013781 (G3DSA:3.20.20.GENE3D); IPR001223 (PFAM); PTHR11177 (PANTHER); PTHR11177:SF222 (PANTHER); PTHR11177:SF222 (PANTHER); IPR017853 (SUPERFAMILY)	NA	NA	89.4542	2.66667	70.9097	14.6667	35.3333	26.5719
DR_004353-RA	GT31	glyco -N-acetylgalactosamine 3-beta-galactosyltransferase 1	C:integral component of membrane	0	PTHR23033:SF18 (PANTHER); PTHR23033:SF18 (PANTHER); PTHR23033 (PANTHER); PTHR23033 (PANTHER)	NA	NA	NA	NA	NA	NA	3.66667	1.7311
DR_004376-RA	GH135	cell surface	P:biological_process; C:cellular_component; F:molecular_function	0	IPR021986 (PFAM)	NA	NA	NA	NA	NA	NA	6.66667	14.8303
DR_004377-RA	GH135	spherulin 4-like cell surface	C:integral component of membrane	0	IPR021986 (PFAM); PTHR35040:SF2 (PANTHER); PTHR35040 (PANTHER)	NA	NA	NA	NA	NA	NA	NA	NA
DR_004378-RA	GT4	glycosyltransferase family 4	C:integral component of membrane; F:transferase activity	0	G3DSA:3.40.50.2000 (GENE3D); IPR001296 (PFAM); PTHR12526 (PANTHER); PTHR12526:SF393 (PANTHER); PTHR12526 (PANTHER); PTHR12526:SF393 (PANTHER); PTHR12526:SF393 (PANTHER); PTHR12526 (PANTHER); SSF53756 (SUPERFAMILY)	NA	NA	NA	NA	4.7589	1.33333	20	8.44398
DR_004387-RA	GH28	polygalacturonase 6	P:metabolic process; F:hydrolase activity	0	IPR000743 (PFAM); IPR012334 (G3DSA:2.160.20.GENE3D); PTHR31884:SF9 (PANTHER); PTHR31884 (PANTHER); IPR011050 (SUPERFAMILY)	NA	NA	33.5264	1	NA	NA	NA	NA
DR_004399-RA	GT62	mannan polymerase complexes MNN9 subunit	C:cis-Golgi network; P:mannosylation; F:alpha-1,6-mannosyltransferase activity; P:protein N-linked glycosylation; C:endoplasmic reticulum; P:negative regulation of G0 to G1 transition; C:alpha-1,6-mannosyltransferase complex	EC:2.4.1	PF03452 (PFAM); PTHR24319 (PANTHER); PTHR24319:SF35 (PANTHER)	NA	NA	NA	NA	42.8598	9.33333	30.6667	24.6395
DR_004406-RA	CE1	prolyl oligopeptidase	P:proteolysis; F:serine-type peptidase activity	0	IPR011042 (G3DSA:2.120.10.GENE3D); IPR029058 (G3DSA:3.40.50.GENE3D); PTHR11731 (PANTHER); PTHR11731:SF150 (PANTHER); SSF50960 (SUPERFAMILY)	NA	NA	NA	NA	42.5987	6.66667	34.6667	24.8851
DR_004426-RA	AA2	ascorbate peroxidase [Purpureocillium lilacinum]	F:peroxidase activity; P:response to oxidative stress; F:metal ion binding; C:integral component of membrane; P:cellular oxidant detoxification; P:oxidation-reduction process; F:heme binding	EC:1.11.1.7	IPR002207 (PRINTS); IPR002016 (PRINTS); IPR002016 (PFAM); G3DSA:1.10.420.10 (GENE3D); G3DSA:1.10.520.10 (GENE3D); PTHR31356 (PANTHER); PTHR31356:SF7 (PANTHER); PTHR31356 (PANTHER); PTHR31356:SF7 (PANTHER); IPR002016 (PROSITE_PROFILES); IPR010255 (SUPERFAMILY)	668.095	5.66667	447.794	11	889.342	188.667	239.333	205.596
DR_004468-RA	AA6	benzoquinone reductase	F:FMN binding; P:negative regulation of transcription, DNA-templated; F:oxidoreductase activity; P:oxidation-reduction process	0	IPR029039 (G3DSA:3.40.50.GENE3D); IPR005025 (PFAM); PTHR30546 (PANTHER); IPR008254 (PROSITE_PROFILES); IPR029039 (SUPERFAMILY)	NA	NA	NA	NA	NA	NA	6.66667	9.19502
DR_004541-RA	GH53	glycosyl hydrolase family 53	P:carbohydrate metabolic process; F:arabinogalactan endo-1,4-beta-galactosidase activity; F:glucosidase activity	EC:3.2.1.89; EC:3.2.1	IPR013781 (G3DSA:3.20.20.GENE3D); IPR011683 (PFAM); PTHR34983:SF1 (PANTHER); PTHR34983 (PANTHER); IPR017853 (SUPERFAMILY)	NA	NA	NA	NA	12.9658	3.66667	21	23.0768
DR_004555-RA	CE4	polysaccharide deacetylase family [Marssonina brunnea multigermtubi MB_m1]	F:hydrolase activity, acting on carbon-nitrogen (but not peptide) bonds; P:carbohydrate metabolic process	0	IPR002509 (G3DSA:3.20.20.GENE3D); IPR002509 (PFAM); PTHR10587 (PANTHER); PTHR10587:SF76 (PANTHER); IPR002509 (PROSITE_PROFILES); IPR011330 (SUPERFAMILY)	NA	NA	NA	NA	9.56628	2.66667	5.33333	5.17725
DR_004569-RA	AA3	alcohol oxidase	F:oxidoreductase activity	0	IPR023753 (G3DSA:3.50.50.GENE3D); IPR000172 (PFAM); IPR023753 (G3DSA:3.50.50.GENE3D); G3DSA:3.30.560.10 (GENE3D); PTHR11552 (PANTHER); PTHR11552:SF134 (PANTHER); PTHR11552 (PANTHER); PTHR11552:SF134 (PANTHER); IPR023753 (SUPERFAMILY)	NA	NA	NA	NA	NA	NA	6	3.96852
DR_004578-RA	GH43	glycoside hydrolase family 43 carbohydrate-binding module family 35 [Cercospora fijiensis CIRAD86]	P:carbohydrate metabolic process; F:hydrolase activity, hydrolyzing O-glycosyl compounds	0	IPR023296 (G3DSA:2.115.10.GENE3D); IPR006710 (PANTHER); PTHR22925:SF39 (PANTHER); IPR023296 (SUPERFAMILY)	NA	NA	NA	NA	NA	NA	NA	NA
DR_004599-RA	GT31	glycosyltransferase family 31	C:membrane; C:integral component of membrane; F:transferase activity	0	IPR006740 (PFAM); PTHR10811 (PANTHER); PTHR10811:SF24 (PANTHER)	NA	NA	NA	NA	7.13835	2	27.3333	26.8735
DR_004634-RA	GH32	Glycoside hydrolase family 32	P:sucrose catabolic process; C:cytoplasm; F:sucrose alpha-glucosidase activity	EC:3.2.1.26; EC:3.2.1.48	IPR001362 (SMART); IPR011040 (G3DSA:2.120.10.GENE3D); IPR013148 (PFAM); IPR013189 (G3DSA:2.60.120.GENE3D); PTHR30175:SF0 (PANTHER); PTHR30175 (PANTHER); IPR013320 (SUPERFAMILY); IPR023296 (SUPERFAMILY)	NA	NA	117.642	2.33333	50.5742	3.66667	23.6667	18.7601
DR_004653-RA	GH17	glucan 1,3-beta-glucosidase	P:carbohydrate metabolic process; F:hydrolase activity	0	IPR013781 (G3DSA:3.20.20.GENE3D); PTHR16631 (PANTHER); PTHR16631:SF13 (PANTHER); IPR017853 (SUPERFAMILY)	142.089	1.33333	475.61	13	428.875	91.3333	159	135.939
DR_004663-RA	GH55	1,3-beta glucanase [Marssonina brunnea multigermtubi MB_m1]	C:integral component of membrane; F:lyase activity; F:hydrolase activity	0	IPR024535 (PFAM); IPR012334 (G3DSA:2.160.20.GENE3D); PTHR31375 (PANTHER); PTHR31375:SF22 (PANTHER); IPR011050 (SUPERFAMILY)	NA	NA	33.5643	1	NA	NA	16.3333	11.7116
DR_004672-RA	CE1	hydrolase [Marssonina brunnea multigermtubi MB_m1]	F:hydrolase activity	0	IPR022742 (PFAM); IPR029058 (G3DSA:3.40.50.GENE3D); PTHR11614 (PANTHER); PTHR11614:SF87 (PANTHER); IPR029058 (SUPERFAMILY)	98.203	0.666667	117.642	2.33333	30.8844	8.66667	18	20.7275
DR_004708-RA	CE1	homoserine acetyltransferase family	P:methionine biosynthetic process; F:polynucleotide adenylyltransferase activity; C:Mmi1 nuclear focus complex; P:snoRNA polyadenylation; P:mRNA polyadenylation; F:magnesium ion binding; F:homoserine O-acetyltransferase activity; F:ATP binding; F:RNA binding; C:mRNA cleavage and polyadenylation specificity factor complex; P:nuclear-transcribed mRNA catabolic process, meiosis-specific transcripts;…	EC:2.3.1.31; EC:2.7.7.19	IPR029058 (G3DSA:3.40.50.GENE3D); IPR000073 (PFAM); PTHR10992 (PANTHER); PTHR10992 (PANTHER); PTHR10992:SF903 (PANTHER); PTHR10992:SF903 (PANTHER); IPR029058 (SUPERFAMILY)	NA	NA	67.0528	2	48.4261	8.33333	39.6667	29.2166
DR_004713-RA	AA3	choline dehydrogenase [Marssonina brunnea multigermtubi MB_m1]	F:oxidoreductase activity, acting on CH-OH group of donors; F:flavin adenine dinucleotide binding; P:oxidation-reduction process; C:intracellular	0	IPR007867 (PFAM); IPR012132 (PIRSF); IPR000172 (PFAM); IPR023753 (G3DSA:3.50.50.GENE3D); PTHR11552 (PANTHER); PTHR11552:SF135 (PANTHER); SSF54373 (SUPERFAMILY); IPR023753 (SUPERFAMILY)	NA	NA	44.7271	1.33333	17.8701	5	29.3333	26.7141
DR_004715-RA	AA11	hypothetical protein MBM_06927 [Marssonina brunnea f. sp. 'multigermtubi' MB_m1]	0	0	PTHR36182:SF2 (PANTHER); PTHR36182 (PANTHER)	NA	NA	NA	NA	NA	NA	17.3333	18.076
DR_004718-RA	GT90	DUF821 domain-containing [Marssonina brunnea multigermtubi MB_m1]	C:integral component of membrane	0	IPR006598 (SMART); IPR006598 (PFAM); PTHR12203 (PANTHER); PTHR12203:SF35 (PANTHER)	NA	NA	NA	NA	20.1526	5.66667	18.6667	16.72
DR_004727-RA	GH16	glucan 1,3-beta-glucosidase [Marssonina brunnea multigermtubi MB_m1]	P:carbohydrate metabolic process; C:integral component of membrane; F:hydrolase activity, hydrolyzing O-glycosyl compounds; F:carbohydrate binding	0	IPR013320 (G3DSA:2.60.120.GENE3D); IPR000757 (PFAM); PTHR10963:SF28 (PANTHER); PTHR10963 (PANTHER); IPR000757 (PROSITE_PROFILES); IPR013320 (SUPERFAMILY)	NA	NA	NA	NA	NA	NA	1.66667	1.69552
DR_004728-RA	GH30	glycoside hydrolase family 30 [Baudoinia panamericana UAMH 10762]	F:hydrolase activity, hydrolyzing O-glycosyl compounds; P:primary metabolic process; P:organic substance metabolic process	0	IPR013781 (G3DSA:3.20.20.GENE3D); IPR013780 (G3DSA:2.60.40.GENE3D)	NA	NA	NA	NA	NA	NA	9.66667	8.60722
DR_004729-RA	GT31	glycosyltransferase family 31	F:transferase activity, transferring glycosyl groups; C:membrane; C:integral component of membrane; F:transferase activity	0	IPR006740 (PFAM); PTHR10811:SF24 (PANTHER); PTHR10811 (PANTHER)	NA	NA	95.2023	1.66667	8.2069	2.33333	39.6667	34.7256
DR_004751-RA	GT31	glycosyltransferase family 31	F:transferase activity, transferring glycosyl groups; C:membrane	0	IPR003378 (PFAM); PTHR23033:SF18 (PANTHER); PTHR23033 (PANTHER)	NA	NA	128.918	2.66667	41.2581	9	28	23.675
DR_004752-RA	AA9	endoglucanase II [Marssonina brunnea multigermtubi MB_m1]	P:biological regulation; P:metabolic process; F:binding; F:hydrolase activity	0	IPR005103 (PFAM); PTHR33353 (PANTHER); PTHR33353:SF1 (PANTHER)	NA	NA	NA	NA	NA	NA	NA	NA
DR_004761-RA	CE4	carbohydrate esterase family 4	F:catalytic activity; C:membrane	0	IPR002509 (G3DSA:3.20.20.GENE3D); IPR002509 (PFAM); PTHR10587:SF83 (PANTHER); PTHR10587 (PANTHER); IPR002509 (PROSITE_PROFILES); IPR011330 (SUPERFAMILY)	NA	NA	NA	NA	NA	NA	13.6667	15.2572
DR_004771-RA	GH76	glycoside hydrolase family 76 [Marssonina brunnea multigermtubi MB_m1]	F:hydrolase activity	0	IPR005198 (PFAM); IPR012341 (G3DSA:1.50.10.GENE3D); PTHR12145:SF14 (PANTHER); PTHR12145 (PANTHER); PTHR12145 (PANTHER); PTHR12145:SF14 (PANTHER); PTHR12145 (PANTHER); PTHR12145:SF14 (PANTHER); IPR008928 (SUPERFAMILY)	NA	NA	NA	NA	NA	NA	NA	NA
DR_004778-RA	PL1	polysaccharide lyase family 1	P:carbohydrate metabolic process; F:catalytic activity	0	IPR012334 (G3DSA:2.160.20.GENE3D); PTHR31683 (PANTHER); PTHR31683:SF10 (PANTHER); IPR011050 (SUPERFAMILY)	NA	NA	NA	NA	NA	NA	NA	NA
DR_004782-RA	CBM35	mannan endo-1,4-beta-mannosidase [Marssonina brunnea multigermtubi MB_m1]	F:nucleotide binding; P:carbohydrate metabolic process; F:coenzyme binding; F:oxidoreductase activity; F:hydrolase activity, hydrolyzing O-glycosyl compounds; F:carbohydrate binding	0	no IPS match	NA	NA	NA	NA	NA	NA	NA	NA
DR_004784-RA	GH135	cell surface	0	0	no IPS match	NA	NA	NA	NA	NA	NA	33.3333	39.9208
DR_004792-RA	GH53	arabinogalactan endo-1,4-beta-galactosidase [Marssonina brunnea multigermtubi MB_m1]	P:metabolic process; F:hydrolase activity, hydrolyzing O-glycosyl compounds	0	IPR011683 (PFAM); IPR013781 (G3DSA:3.20.20.GENE3D); PTHR34983:SF2 (PANTHER); PTHR34983 (PANTHER); IPR017853 (SUPERFAMILY)	NA	NA	157.03	2.33333	316.686	44	56	52.0713
DR_004828-RA	PL3	pectate lyase	F:lyase activity	0	IPR004898 (PFAM); IPR012334 (G3DSA:2.160.20.GENE3D); PTHR33407 (PANTHER); PTHR33407:SF7 (PANTHER); IPR011050 (SUPERFAMILY)	NA	NA	274.596	4.66667	3.54494	1	8.33333	10.3929
DR_004830-RA	PL1	pectate lyase [Marssonina brunnea multigermtubi MB_m1]	P:polysaccharide catabolic process; F:lyase activity; C:extracellular region	0	no IPS match	NA	NA	NA	NA	NA	NA	NA	NA
DR_004871-RA	GT32	glycosyltransferase family 32	P:N-glycan processing; P:mannosylation; C:membrane; C:integral component of membrane; F:alpha-1,6-mannosyltransferase activity; F:transferase activity; C:alpha-1,6-mannosyltransferase complex	0	PTHR31834:SF9 (PANTHER); PTHR31834 (PANTHER); PTHR31834:SF9 (PANTHER)	NA	NA	NA	NA	NA	NA	22.3333	23.7465
DR_004878-RA	GH76	glycosyl hydrolase [Marssonina brunnea multigermtubi MB_m1]	F:hydrolase activity	0	IPR012341 (G3DSA:1.50.10.GENE3D); IPR005198 (PFAM); PTHR12145 (PANTHER); PTHR12145:SF24 (PANTHER); PTHR12145:SF24 (PANTHER); PTHR12145:SF24 (PANTHER); PTHR12145 (PANTHER); PTHR12145:SF24 (PANTHER); PTHR12145 (PANTHER); PTHR12145 (PANTHER); IPR008928 (SUPERFAMILY)	NA	NA	NA	NA	NA	NA	6.66667	4.05591
DR_004884-RA	AA3	GMC oxidoreductase	F:oxidoreductase activity	0	IPR007867 (PFAM); IPR000172 (PFAM); IPR012132 (PIRSF); IPR023753 (G3DSA:3.50.50.GENE3D); PTHR11552 (PANTHER); PTHR11552:SF117 (PANTHER); SSF54373 (SUPERFAMILY); IPR023753 (SUPERFAMILY)	NA	NA	NA	NA	NA	NA	NA	NA
DR_004912-RA	GT90	glycosyltransferase family 90	C:integral component of membrane; C:endomembrane system; F:glucosyltransferase activity; P:glycolipid metabolic process	EC:2.4.1	IPR006598 (SMART); IPR006598 (PFAM); PTHR12203:SF26 (PANTHER); PTHR12203:SF26 (PANTHER); PTHR12203 (PANTHER); PTHR12203 (PANTHER)	NA	NA	NA	NA	NA	NA	14.3333	12.2477
DR_004916-RA	GT22	GPI mannosyltransferase 4	P:GPI anchor biosynthetic process; P:mannosylation; C:integral component of membrane; F:dolichyl-phosphate-mannose-glycolipid alpha-mannosyltransferase activity; P:plasmid maintenance	EC:2.4.1.130	IPR005599 (PFAM); PTHR22760:SF3 (PANTHER); IPR005599 (PANTHER)	NA	NA	61.7138	0.666667	8.25537	2.33333	13.3333	9.58187
DR_004967-RA	AA7	FAD binding domain [Colletotrichum gloeosporioides Nara gc5]	F:oxidoreductase activity	0	IPR016169 (G3DSA:3.30.465.GENE3D); IPR006094 (PFAM); PTHR13878 (PANTHER); IPR016166 (PROSITE_PROFILES); IPR016166 (SUPERFAMILY)	NA	NA	NA	NA	NA	NA	8.66667	6.43858
DR_004974-RA	CBM50	domain-containing [Marssonina brunnea multigermtubi MB_m1]	0	0	IPR018392 (G3DSA:3.10.350.GENE3D); PTHR20932 (PANTHER); PTHR20932:SF15 (PANTHER); IPR018392 (SUPERFAMILY)	NA	NA	NA	NA	NA	NA	10	7.51282
DR_004981-RA	PL3	pectate lyase [Marssonina brunnea multigermtubi MB_m1]	P:carbohydrate metabolic process; F:pectate lyase activity; F:lyase activity; C:extracellular region; F:hydrolase activity, hydrolyzing O-glycosyl compounds; F:cellulose binding	0	PR01217 (PRINTS)	NA	NA	44.6892	1.33333	6.02134	1.66667	47.3333	48.4176
DR_004983-RA	GT2	polysaccharide synthase	C:membrane; C:integral component of membrane; F:transferase activity	0	IPR029044 (G3DSA:3.90.550.GENE3D); IPR001173 (PFAM); PTHR10587 (PANTHER); PTHR10587:SF1 (PANTHER); IPR029044 (SUPERFAMILY)	NA	NA	NA	NA	NA	NA	NA	NA
DR_004986-RA	CE10	triacylglycerol lipase	C:membrane; F:binding; F:carboxylic ester hydrolase activity	EC:3.1.1.1	IPR029058 (G3DSA:3.40.50.GENE3D); IPR002018 (PFAM); PTHR11559 (PANTHER); PTHR11559:SF249 (PANTHER); IPR029058 (SUPERFAMILY)	NA	NA	NA	NA	NA	NA	2	1.73057
DR_004989-RA	GH72	glycoside hydrolase family 72	P:fungal-type cell wall organization; C:fungal-type cell wall; P:fungal-type cell wall (1->3)-beta-D-glucan biosynthetic process; C:anchored component of external side of plasma membrane; F:oxidoreductase activity; F:metal ion binding; P:oxidation-reduction process; F:1,3-beta-glucanosyltransferase activity; F:hydrolase activity	0	IPR004886 (PFAM); PTHR31468 (PANTHER); PTHR31468:SF5 (PANTHER)	NA	NA	NA	NA	NA	NA	NA	NA
DR_005024-RA	GH92	glycoside hydrolase family 92	P:carbohydrate metabolic process; F:catalytic activity; F:carbohydrate binding	0	IPR012939 (PFAM); G3DSA:1.20.1050.60 (GENE3D); IPR014718 (G3DSA:2.70.98.GENE3D); G3DSA:1.20.1610.10 (GENE3D); PTHR12143 (PANTHER); PTHR12143 (PANTHER); PTHR12143:SF22 (PANTHER); PTHR12143:SF22 (PANTHER); IPR008928 (SUPERFAMILY)	NA	NA	NA	NA	8.40079	2.33333	13.3333	9.87601
DR_005028-RA	GH76	glycoside hydrolase family 76 [Purpureocillium lilacinum]	F:catalytic activity	0	IPR012341 (G3DSA:1.50.10.GENE3D); IPR005198 (PFAM); PTHR12145:SF14 (PANTHER); PTHR12145 (PANTHER); IPR008928 (SUPERFAMILY)	NA	NA	NA	NA	NA	NA	4.33333	4.47177
DR_005065-RA	GH27	alpha-galactosidase B [Marssonina brunnea multigermtubi MB_m1]	P:carbohydrate metabolic process; F:raffinose alpha-galactosidase activity	EC:3.2.1.22	IPR002241 (PRINTS); IPR013785 (G3DSA:3.20.20.GENE3D); IPR013780 (G3DSA:2.60.40.GENE3D); IPR002241 (PFAM); PTHR11452 (PANTHER); PTHR11452:SF38 (PANTHER); SSF51011 (SUPERFAMILY); IPR017853 (SUPERFAMILY)	NA	NA	NA	NA	17.7059	2.33333	14	9.72705
DR_005079-RA	GH128	(Trans)glycosidase [Glarea lozoyensis ATCC 20868]	P:carbohydrate metabolic process; C:intracellular	0	IPR013781 (G3DSA:3.20.20.GENE3D); IPR024655 (PFAM); PTHR34154:SF3 (PANTHER); PTHR34154 (PANTHER); IPR017853 (SUPERFAMILY)	NA	NA	NA	NA	NA	NA	14.6667	12.6317
DR_005087-RA	AA3	alcohol oxidase	F:oxidoreductase activity, acting on CH-OH group of donors; F:flavin adenine dinucleotide binding; P:oxidation-reduction process	0	IPR023753 (G3DSA:3.50.50.GENE3D); G3DSA:3.30.560.10 (GENE3D); IPR007867 (PFAM); PTHR11552 (PANTHER); PTHR11552 (PANTHER); PTHR11552 (PANTHER); PTHR11552:SF78 (PANTHER); PTHR11552:SF78 (PANTHER); IPR023753 (SUPERFAMILY); SSF54373 (SUPERFAMILY)	NA	NA	NA	NA	4.80738	1.33333	25	19.0084
DR_005107-RA	GH16	Concanavalin A-like lectin glucanase	P:carbohydrate metabolic process; F:hydrolase activity, hydrolyzing O-glycosyl compounds	0	IPR000757 (PFAM); IPR013320 (G3DSA:2.60.120.GENE3D); PTHR10963:SF34 (PANTHER); PTHR10963 (PANTHER); IPR000757 (PROSITE_PROFILES); IPR013320 (SUPERFAMILY)	NA	NA	NA	NA	NA	NA	NA	NA
DR_005109-RA	GT34	galactosyl transferase GMA12 MNN10 family [Marssonina brunnea multigermtubi MB_m1]	C:nucleus; P:cell wall mannoprotein biosynthetic process; P:barrier septum assembly; C:mitochondrial matrix; P:mannosylation; F:alpha-1,6-mannosyltransferase activity; P:protein N-linked glycosylation; P:cell budding; P:tRNA methylation; C:alpha-1,6-mannosyltransferase complex; F:tRNA (guanine-N1-)-methyltransferase activity	EC:2.1.1; EC:2.4.1	PTHR31306 (PANTHER); PTHR31306:SF5 (PANTHER)	187.335	1.66667	33.5264	1	17.9671	5	67.6667	48.4815
DR_005121-RA	PL4	rhamnogalacturonan lyase	F:catalytic activity	0	IPR014718 (G3DSA:2.70.98.GENE3D); IPR015364 (PFAM); PTHR36574:SF1 (PANTHER); PTHR36574 (PANTHER); PTHR36574:SF1 (PANTHER); PTHR36574 (PANTHER); IPR011013 (SUPERFAMILY)	NA	NA	89.4163	2.66667	60.2749	11.6667	24.6667	19.6601
DR_005122-RA	GT2	dolichyl-phosphate beta-glucosyltransferase	C:endoplasmic reticulum membrane; C:integral component of membrane; F:dolichyl-phosphate beta-glucosyltransferase activity; P:protein N-linked glycosylation	EC:2.4.1.117	IPR001173 (PFAM); IPR029044 (G3DSA:3.90.550.GENE3D); PTHR10859:SF91 (PANTHER); PTHR10859 (PANTHER); PTHR10859:SF91 (PANTHER); IPR029044 (SUPERFAMILY)	NA	NA	156.992	2.33333	18.9199	2.66667	14.3333	13.7036
DR_005151-RA	GT39	dolichyl-phosphate-mannose- mannosyltransferase	P:fungal-type cell wall organization; P:filamentous growth; P:cell wall mannoprotein biosynthetic process; P:multicellular organism development; C:integral component of membrane; P:regulation of endoplasmic reticulum unfolded protein response; C:dolichyl-phosphate-mannose-protein mannosyltransferase complex; P:protein O-linked mannosylation; P:chain elongation of O-linked mannose residue; F:dolic…	EC:2.4.1.109	IPR016093 (SMART); IPR016093 (PFAM); G3DSA:2.80.10.50 (GENE3D); IPR032421 (PFAM); IPR027004 (PTHR10050:PANTHER); IPR027005 (PANTHER); IPR016093 (PROSITE_PROFILES); IPR016093 (PROSITE_PROFILES); IPR016093 (PROSITE_PROFILES); IPR016093 (SUPERFAMILY)	NA	NA	NA	NA	NA	NA	37.3333	25.3482
DR_005182-RA	CE5	carbohydrate esterase family 5	P:metabolic process; C:cellular_component; F:hydrolase activity	0	IPR000675 (SMART); IPR029058 (G3DSA:3.40.50.GENE3D); IPR000675 (PFAM); PTHR33630:SF1 (PANTHER); PTHR33630 (PANTHER); IPR029058 (SUPERFAMILY)	NA	NA	NA	NA	NA	NA	NA	NA
DR_005182-RA	CE5	carbohydrate esterase family 5	P:metabolic process; C:cellular_component; F:hydrolase activity	0	IPR000675 (SMART); IPR029058 (G3DSA:3.40.50.GENE3D); IPR000675 (PFAM); PTHR33630:SF1 (PANTHER); PTHR33630 (PANTHER); IPR029058 (SUPERFAMILY)	NA	NA	NA	NA	NA	NA	NA	NA
DR_005300-RA	CE1	Poly(3-hydroxybutyrate) depolymerase [Marssonina brunnea multigermtubi MB_m1]	0	0	IPR029058 (G3DSA:3.40.50.GENE3D); PTHR38050 (PANTHER); PTHR38050:SF2 (PANTHER); IPR029058 (SUPERFAMILY)	NA	NA	NA	NA	NA	NA	NA	NA
DR_005303-RA	CE1	alpha beta-hydrolase	C:nucleus; C:membrane; C:cytosol; F:hydrolase activity	0	IPR029058 (G3DSA:3.40.50.GENE3D); IPR003140 (PFAM); PTHR10655 (PANTHER); PTHR10655:SF2 (PANTHER); IPR029058 (SUPERFAMILY)	NA	NA	NA	NA	NA	NA	5.33333	7.06663
DR_005319-RA	GH31	glucosidase II alpha subunit [Marssonina brunnea multigermtubi MB_m1]	P:carbohydrate metabolic process; F:hydrolase activity, hydrolyzing O-glycosyl compounds; F:carbohydrate binding	0	IPR025887 (PFAM); IPR000322 (PFAM); PTHR22762:SF54 (PANTHER); PTHR22762 (PANTHER); PTHR22762 (PANTHER); PTHR22762:SF54 (PANTHER); PTHR22762 (PANTHER); SSF51011 (SUPERFAMILY); IPR017853 (SUPERFAMILY); IPR011013 (SUPERFAMILY)	NA	NA	NA	NA	28.5049	8	53	29.9242
DR_005319-RA	GH31	glucosidase II alpha subunit [Marssonina brunnea multigermtubi MB_m1]	P:carbohydrate metabolic process; F:hydrolase activity, hydrolyzing O-glycosyl compounds; F:carbohydrate binding	0	IPR025887 (PFAM); IPR000322 (PFAM); PTHR22762:SF54 (PANTHER); PTHR22762 (PANTHER); PTHR22762 (PANTHER); PTHR22762:SF54 (PANTHER); PTHR22762 (PANTHER); SSF51011 (SUPERFAMILY); IPR017853 (SUPERFAMILY); IPR011013 (SUPERFAMILY)	NA	NA	NA	NA	28.5049	8	53	29.9242
DR_005327-RA	GT28	L-arabinokinase [Marssonina brunnea multigermtubi MB_m1]	P:phosphorylation; F:kinase activity	0	PTHR38134 (PANTHER); PTHR38134:SF2 (PANTHER); SSF53756 (SUPERFAMILY)	NA	NA	NA	NA	NA	NA	NA	NA
DR_005336-RA	GH18	glycoside hydrolase family 18	F:chitinase activity; P:carbohydrate metabolic process; F:chitin binding; P:chitin catabolic process; C:extracellular region	EC:3.2.1.14	IPR013781 (G3DSA:3.20.20.GENE3D); IPR001223 (PFAM); PTHR11177 (PANTHER); PTHR11177:SF160 (PANTHER); IPR017853 (SUPERFAMILY)	NA	NA	78.2156	2.33333	107.942	22.3333	25	26.1725
DR_005344-RA	CE1	Acyl- thioesterase 1	P:macromolecule deacylation; F:hydrolase activity	0	IPR003140 (PFAM); IPR029058 (G3DSA:3.40.50.GENE3D); PTHR10655:SF17 (PANTHER); PTHR10655 (PANTHER); IPR029058 (SUPERFAMILY)	NA	NA	123.428	1.33333	6.02134	1.66667	42.3333	25.9343
DR_005369-RA	GH76	glycoside hydrolase family 76	C:nucleus; P:metabolic process; C:cytosol; F:hydrolase activity, acting on glycosyl bonds	0	IPR012341 (G3DSA:1.50.10.GENE3D); IPR005198 (PFAM); PTHR12145:SF20 (PANTHER); PTHR12145 (PANTHER); IPR008928 (SUPERFAMILY)	NA	NA	NA	NA	14.161	1.33333	13	14.2366
DR_005372-RA	AA3	mitochondrial AAA ATPase	F:nucleotide binding; F:oxidoreductase activity; P:metabolic process; P:cellular response to DNA damage stimulus; P:single-organism process; F:hydrolase activity	0	IPR003593 (SMART); IPR003959 (PFAM); G3DSA:1.10.8.60 (GENE3D); IPR027417 (G3DSA:3.40.50.GENE3D); PTHR23074:SF88 (PANTHER); PTHR23074:SF88 (PANTHER); PTHR23074 (PANTHER); PTHR23074 (PANTHER); IPR027417 (SUPERFAMILY)	121.507	0.666667	95.2023	1.66667	136.264	25	78	36.7871
DR_005403-RA	GT8	galactinol synthase [Fusarium fujikuroi]	F:transferase activity, transferring glycosyl groups	0	IPR029044 (G3DSA:3.90.550.GENE3D); IPR002495 (PFAM); PTHR11183 (PANTHER); PTHR11183:SF43 (PANTHER); PTHR11183:SF43 (PANTHER); IPR029044 (SUPERFAMILY)	NA	NA	NA	NA	NA	NA	6	3.52274
DR_005411-RA	GT71	glycosyltransferase family 71	F:transferase activity, transferring glycosyl groups; P:mycelium development; C:membrane; P:protein glycosylation	0	IPR022751 (PFAM); IPR029044 (G3DSA:3.90.550.GENE3D); PTHR31646 (PANTHER); IPR029044 (SUPERFAMILY)	NA	NA	NA	NA	NA	NA	NA	NA
DR_005430-RA	AA11	endoglucanase [Colletotrichum fioriniae PJ7]	C:membrane; C:integral component of membrane	0	PTHR36182 (PANTHER); PTHR36182:SF2 (PANTHER)	NA	NA	NA	NA	15.5391	4.33333	13.3333	15.8952
DR_005430-RA	AA11	endoglucanase [Colletotrichum fioriniae PJ7]	C:membrane; C:integral component of membrane	0	PTHR36182 (PANTHER); PTHR36182:SF2 (PANTHER)	NA	NA	NA	NA	15.5391	4.33333	13.3333	15.8952
DR_005431-RA	GT2	hyaluronan synthase [Marssonina brunnea multigermtubi MB_m1]	C:membrane; C:integral component of membrane; F:transferase activity	0	PF03142 (PFAM); IPR029044 (G3DSA:3.90.550.GENE3D); IPR026107 (PANTHER); PTHR22913:SF12 (PANTHER); IPR029044 (SUPERFAMILY)	NA	NA	NA	NA	NA	NA	24.6667	17.9042
DR_005433-RA	CBM16	hypothetical protein MBM_05462 [Marssonina brunnea f. sp. 'multigermtubi' MB_m1]	0	0	IPR008979 (G3DSA:2.60.120.GENE3D)	NA	NA	NA	NA	29.5062	5.66667	42	40.2269
DR_005454-RA	GH13	1,4-alpha-glucan-branching enzyme	C:proton-transporting ATP synthase complex, catalytic core F(1); F:ATP binding; P:glycogen biosynthetic process; F:1,4-alpha-glucan branching enzyme activity; P:ATP hydrolysis coupled proton transport; F:cation binding; F:hydrolase activity, hydrolyzing O-glycosyl compounds; P:ATP synthesis coupled proton transport; F:proton-transporting ATP synthase activity, rotational mechanism	EC:2.4.1.18	IPR013781 (G3DSA:3.20.20.GENE3D); IPR006047 (PFAM); PTHR10357:SF159 (PANTHER); IPR015902 (PANTHER); IPR017853 (SUPERFAMILY)	NA	NA	168.155	2.66667	116.938	19.6667	66	46.2627
DR_005454-RA	CBM48	1,4-alpha-glucan-branching enzyme	C:proton-transporting ATP synthase complex, catalytic core F(1); F:ATP binding; P:glycogen biosynthetic process; F:1,4-alpha-glucan branching enzyme activity; P:ATP hydrolysis coupled proton transport; F:cation binding; F:hydrolase activity, hydrolyzing O-glycosyl compounds; P:ATP synthesis coupled proton transport; F:proton-transporting ATP synthase activity, rotational mechanism	EC:2.4.1.18	IPR013781 (G3DSA:3.20.20.GENE3D); IPR006047 (PFAM); PTHR10357:SF159 (PANTHER); IPR015902 (PANTHER); IPR017853 (SUPERFAMILY)	NA	NA	168.155	2.66667	116.938	19.6667	66	46.2627
DR_005494-RA	CE16	lysophospholipase a	F:catalytic activity	0	IPR013830 (G3DSA:3.40.50.GENE3D); PTHR22835 (PANTHER); PTHR22835:SF221 (PANTHER)	NA	NA	NA	NA	NA	NA	3.66667	2.07668
DR_005496-RA	AA7	glucooligosaccharide oxidase	F:oxidoreductase activity, acting on CH-OH group of donors; F:flavin adenine dinucleotide binding; P:oxidation-reduction process	0	IPR016169 (G3DSA:3.30.465.GENE3D); PTHR11748 (PANTHER); PTHR11748:SF64 (PANTHER); IPR016166 (SUPERFAMILY)	NA	NA	NA	NA	NA	NA	9	7.28588
DR_005497-RA	GH13	alpha amylase [Marssonina brunnea multigermtubi MB_m1]	P:carbohydrate metabolic process; F:calcium ion binding; F:hydrolase activity, hydrolyzing O-glycosyl compounds	0	IPR013781 (G3DSA:3.20.20.GENE3D); PTHR10357:SF168 (PANTHER); IPR015902 (PANTHER); IPR015902 (PANTHER); IPR017853 (SUPERFAMILY)	NA	NA	61.7138	0.666667	23.8242	4	15.6667	9.8619
DR_005506-RA	GT58	glycosyltransferase family 58	F:transferase activity, transferring hexosyl groups; C:integral component of membrane; C:endoplasmic reticulum	0	IPR007873 (PFAM); IPR007873 (PANTHER); PTHR12646:SF0 (PANTHER)	NA	NA	NA	NA	7.18683	2	NA	NA
DR_005520-RA	GT2	chitin synthase	C:myosin complex; F:DNA binding; F:ATP binding; F:transferase activity, transferring hexosyl groups; C:integral component of membrane; F:motor activity	0	IPR001199 (SMART); IPR001609 (SMART); IPR001199 (G3DSA:3.10.120.GENE3D); IPR001199 (PFAM); IPR001609 (PFAM); IPR001199 (G3DSA:3.10.120.GENE3D); PF03142 (PFAM); IPR004835 (PANTHER); PTHR22914:SF18 (PANTHER); IPR001199 (PROSITE_PROFILES); IPR001609 (PROSITE_PROFILES); IPR027417 (SUPERFAMILY); IPR029044 (SUPERFAMILY); IPR001199 (SUPERFAMILY)	341.217	2	156.954	2.33333	102.085	23.3333	71	33.7714
DR_005521-RA	GT2	chitin synthase	C:myosin complex; F:DNA binding; F:ATP binding; F:transferase activity, transferring hexosyl groups; C:integral component of membrane; F:motor activity	0	IPR001609 (SMART); IPR001199 (PFAM); IPR001199 (G3DSA:3.10.120.GENE3D); PF03142 (PFAM); IPR001609 (PFAM); IPR004835 (PANTHER); PTHR22914:SF13 (PANTHER); IPR001199 (PROSITE_PROFILES); IPR027417 (SUPERFAMILY); IPR029044 (SUPERFAMILY); IPR001199 (SUPERFAMILY)	NA	NA	NA	NA	3.59341	1	82.6667	40.9797
DR_005529-RA	GH35	Glycoside family 35 [Penicillium expansum]	P:carbohydrate metabolic process; C:vacuole; F:beta-galactosidase activity	EC:3.2.1.23	IPR025300 (PFAM); IPR008979 (G3DSA:2.60.120.GENE3D); IPR008979 (G3DSA:2.60.120.GENE3D); IPR008979 (SUPERFAMILY); IPR008979 (SUPERFAMILY)	NA	NA	NA	NA	3.59341	1	12.3333	5.30957
DR_005571-RA	GH17	glycoside hydrolase family 17	P:carbohydrate metabolic process; C:integral component of membrane; F:hydrolase activity, hydrolyzing O-glycosyl compounds	0	IPR013781 (G3DSA:3.20.20.GENE3D); PTHR16631 (PANTHER); PTHR16631:SF11 (PANTHER); IPR017853 (SUPERFAMILY)	NA	NA	NA	NA	NA	NA	35.6667	24.2183
DR_005581-RA	CE10	2OG-Fe(II) oxygenase [Talaromyces stipitatus ATCC 10500]	F:oxidoreductase activity; F:metal ion binding; P:oxidation-reduction process	0	IPR027443 (G3DSA:2.60.120.GENE3D); IPR005123 (PFAM); PTHR10209:SF133 (PANTHER); PTHR10209 (PANTHER); IPR005123 (PROSITE_PROFILES); SSF51197 (SUPERFAMILY)	NA	NA	NA	NA	11.7815	0.666667	5.33333	3.8656
DR_005624-RA	GT32	glycosyltransferase sugar-binding region containing DXD domain-containing [Marssonina brunnea multigermtubi MB_m1]	P:N-glycan processing; P:mannosylation; F:alpha-1,6-mannosyltransferase activity; C:alpha-1,6-mannosyltransferase complex	EC:2.4.1	IPR007577 (PFAM); PTHR31834 (PANTHER); PTHR31834:SF1 (PANTHER); IPR029044 (SUPERFAMILY)	NA	NA	NA	NA	NA	NA	13.6667	16.2158
DR_005649-RA	AA8	cellobiose dehydrogenase [Marssonina brunnea multigermtubi MB_m1]	F:oxidoreductase activity, acting on CH-OH group of donors; F:flavin adenine dinucleotide binding; P:oxidation-reduction process	0	IPR023753 (G3DSA:3.50.50.GENE3D); IPR007867 (PFAM); G3DSA:3.30.410.10 (GENE3D); IPR000172 (PFAM); PTHR11552 (PANTHER); PTHR11552:SF87 (PANTHER); IPR023753 (SUPERFAMILY); SSF54373 (SUPERFAMILY)	179.626	1.66667	145.42	4.33333	100.373	28	75	62.3104
DR_005652-RA	GH31	glycoside hydrolase family 31	P:carbohydrate metabolic process; C:integral component of membrane; F:hydrolase activity, hydrolyzing O-glycosyl compounds; F:carbohydrate binding	0	IPR000322 (PFAM); PTHR22762:SF82 (PANTHER); PTHR22762 (PANTHER); PTHR22762:SF82 (PANTHER); PTHR22762 (PANTHER); IPR017853 (SUPERFAMILY); SSF51011 (SUPERFAMILY)	NA	NA	NA	NA	10.6348	3	15.6667	9.88012
DR_005667-RA	GH72	1,3-beta-glucanosyltransferase gel3 precursor [Marssonina brunnea multigermtubi MB_m1]	P:fungal-type cell wall organization; C:fungal-type cell wall; P:fungal-type cell wall (1->3)-beta-D-glucan biosynthetic process; C:anchored component of external side of plasma membrane; C:integral component of membrane; F:1,3-beta-glucanosyltransferase activity; F:hydrolase activity, acting on glycosyl bonds	0	IPR013781 (G3DSA:3.20.20.GENE3D); IPR004886 (PFAM); PTHR31468:SF8 (PANTHER); PTHR31468 (PANTHER); IPR017853 (SUPERFAMILY)	NA	NA	NA	NA	NA	NA	NA	NA
DR_005688-RA	GT1	glycosyltransferase family 28 domain-containing [Marssonina brunnea multigermtubi MB_m1]	P:protein dephosphorylation; P:protein transport; F:sterol 3-beta-glucosyltransferase activity; P:flavonoid biosynthetic process; C:nucleus; F:phosphoprotein phosphatase activity; P:carbohydrate metabolic process; P:flavonoid glucuronidation; C:cytoplasm; P:autophagy; C:membrane; P:sterol biosynthetic process; P:lipid glycosylation	EC:2.4.1.173; EC:3.1.3.16	IPR004182 (SMART); G3DSA:3.40.50.2000 (GENE3D); IPR002213 (PFAM); IPR004276 (PFAM); IPR004182 (PFAM); G3DSA:3.40.50.2000 (GENE3D); IPR002213 (PANTHER); PTHR11926:SF417 (PANTHER); SSF53756 (SUPERFAMILY)	NA	NA	22.3635	0.666667	10.5863	3	15	8.5058
DR_005692-RA	GT25	glycosyltransferase family 25	C:membrane	0	PTHR10730 (PANTHER)	NA	NA	NA	NA	NA	NA	NA	NA
DR_005737-RA	GH93	BNR Asp-box repeat domain containing [Marssonina brunnea multigermtubi MB_m1]	C:membrane; C:integral component of membrane; F:hydrolase activity	0	IPR023296 (G3DSA:2.115.10.GENE3D); PTHR38792:SF3 (PANTHER); PTHR38792 (PANTHER); SSF110296 (SUPERFAMILY)	NA	NA	NA	NA	NA	NA	2.66667	3.19451
DR_005739-RA	GH23	carbohydrate-binding module family 50 [Cercospora fijiensis CIRAD86]	C:small-subunit processome; F:hydrolase activity	0	IPR018392 (SMART); IPR018392 (G3DSA:3.10.350.GENE3D); IPR018392 (PFAM); G3DSA:1.10.530.10 (GENE3D); IPR018392 (G3DSA:3.10.350.GENE3D); IPR018392 (SUPERFAMILY); IPR018392 (SUPERFAMILY); IPR023346 (SUPERFAMILY)	NA	NA	NA	NA	7.08988	2	7.33333	8.17758
DR_005739-RA	CBM50	carbohydrate-binding module family 50 [Cercospora fijiensis CIRAD86]	C:small-subunit processome; F:hydrolase activity	0	IPR018392 (SMART); IPR018392 (G3DSA:3.10.350.GENE3D); IPR018392 (PFAM); G3DSA:1.10.530.10 (GENE3D); IPR018392 (G3DSA:3.10.350.GENE3D); IPR018392 (SUPERFAMILY); IPR018392 (SUPERFAMILY); IPR023346 (SUPERFAMILY)	NA	NA	NA	NA	7.08988	2	7.33333	8.17758
DR_005739-RA	CBM50	carbohydrate-binding module family 50 [Cercospora fijiensis CIRAD86]	C:small-subunit processome; F:hydrolase activity	0	IPR018392 (SMART); IPR018392 (G3DSA:3.10.350.GENE3D); IPR018392 (PFAM); G3DSA:1.10.530.10 (GENE3D); IPR018392 (G3DSA:3.10.350.GENE3D); IPR018392 (SUPERFAMILY); IPR018392 (SUPERFAMILY); IPR023346 (SUPERFAMILY)	NA	NA	NA	NA	7.08988	2	7.33333	8.17758
DR_005800-RA	GT71	alpha-1,2-mannosyltransferase [Coccidioides immitis RS]	F:transferase activity, transferring glycosyl groups; C:membrane; C:integral component of membrane; P:protein glycosylation; F:transferase activity	0	IPR029044 (G3DSA:3.90.550.GENE3D); IPR022751 (PFAM); PTHR31646 (PANTHER); IPR029044 (SUPERFAMILY)	NA	NA	NA	NA	NA	NA	10.6667	9.95616
DR_005801-RA	GH47	mannosyl-oligosaccharide 1,2-alpha-mannosidase IB [Marssonina brunnea multigermtubi MB_m1]	F:calcium ion binding; P:metabolic process; C:integral component of membrane; F:mannosyl-oligosaccharide 1,2-alpha-mannosidase activity	EC:3.2.1.113	IPR001382 (PRINTS); IPR001382 (PFAM); IPR001382 (G3DSA:1.50.10.GENE3D); PTHR11742 (PANTHER); PTHR11742:SF49 (PANTHER); PTHR11742:SF49 (PANTHER); PTHR11742 (PANTHER); IPR001382 (SUPERFAMILY)	NA	NA	NA	NA	22.3194	3.66667	76.3333	63.797
DR_005802-RA	GH7	cellobiohydrolase precursor [Marssonina brunnea multigermtubi MB_m1]	C:extracellular region; F:hydrolase activity, hydrolyzing O-glycosyl compounds; P:cellulose catabolic process; F:cellulose binding	0	IPR001722 (PRINTS); IPR000254 (SMART); IPR001722 (PFAM); IPR000254 (PFAM); PTHR33753:SF2 (PANTHER); PTHR33753 (PANTHER); IPR000254 (PROSITE_PROFILES); IPR000254 (SUPERFAMILY); IPR013320 (SUPERFAMILY)	NA	NA	NA	NA	NA	NA	NA	NA
DR_005802-RA	CBM1	cellobiohydrolase precursor [Marssonina brunnea multigermtubi MB_m1]	C:extracellular region; F:hydrolase activity, hydrolyzing O-glycosyl compounds; P:cellulose catabolic process; F:cellulose binding	0	IPR001722 (PRINTS); IPR000254 (SMART); IPR001722 (PFAM); IPR000254 (PFAM); PTHR33753:SF2 (PANTHER); PTHR33753 (PANTHER); IPR000254 (PROSITE_PROFILES); IPR000254 (SUPERFAMILY); IPR013320 (SUPERFAMILY)	NA	NA	NA	NA	NA	NA	NA	NA
DR_005803-RA	CE3	SGNH hydrolase [Glarea lozoyensis ATCC 20868]	P:carbohydrate metabolic process; P:proteolysis; P:lipid metabolic process; F:serine-type endopeptidase activity; F:hydrolase activity, hydrolyzing O-glycosyl compounds; F:phosphoric diester hydrolase activity; F:hydrolase activity	0	IPR001087 (PFAM); G3DSA:2.130.10.130 (GENE3D); IPR013830 (G3DSA:3.40.50.GENE3D); PF13517 (PFAM); PTHR30383 (PANTHER); PTHR30383:SF4 (PANTHER); IPR013830 (SUPERFAMILY); SSF69318 (SUPERFAMILY)	NA	NA	NA	NA	NA	NA	21.3333	13.8463
DR_005805-RA	AA7	glucooligosaccharide oxidase [Marssonina brunnea multigermtubi MB_m1]	F:oxidoreductase activity, acting on CH-OH group of donors; F:flavin adenine dinucleotide binding; P:oxidation-reduction process	0	PTHR11748:SF77 (PANTHER); PTHR11748 (PANTHER); IPR016166 (SUPERFAMILY)	NA	NA	NA	NA	NA	NA	53.6667	64.7105
DR_005891-RA	AA3	alcohol oxidase	F:flavin adenine dinucleotide binding; P:oxidation-reduction process; F:choline dehydrogenase activity	EC:1.1.99.1	PTHR11552 (PANTHER); PTHR11552:SF119 (PANTHER); PTHR11552:SF119 (PANTHER); PTHR11552 (PANTHER)	NA	NA	67.1285	2	109.452	9.66667	67.6667	36.1381
DR_005894-RA	CE5	cutinase [Marssonina brunnea multigermtubi MB_m1]	F:hydrolase activity	0	IPR000675 (PFAM); IPR029058 (G3DSA:3.40.50.GENE3D); PTHR15087 (PANTHER); PTHR15087:SF14 (PANTHER); IPR029058 (SUPERFAMILY)	NA	NA	NA	NA	NA	NA	NA	NA
DR_005911-RA	CE10	alpha beta-hydrolase [Phialocephala scopiformis]	F:protein-histidine N-methyltransferase activity; F:organic cyclic compound binding; F:heterocyclic compound binding; C:cytosol; P:peptidyl-histidine methylation, to form tele-methylhistidine	EC:2.1.1.85	IPR029058 (G3DSA:3.40.50.GENE3D); IPR013094 (PFAM); PTHR23024:SF24 (PANTHER); PTHR23024 (PANTHER); IPR029058 (SUPERFAMILY)	NA	NA	NA	NA	4.80738	1.33333	24.6667	15.3458
DR_005924-RA	GH5	glycosyl hydrolase family 5 cellulase [Marssonina brunnea multigermtubi MB_m1]	P:carbohydrate metabolic process; F:hydrolase activity, hydrolyzing O-glycosyl compounds	0	IPR013781 (G3DSA:3.20.20.GENE3D); IPR001547 (PFAM); PTHR31263:SF11 (PANTHER); PTHR31263 (PANTHER); IPR017853 (SUPERFAMILY)	NA	NA	NA	NA	NA	NA	8	8.27774
DR_005934-RA	CE10	alpha beta-hydrolase [Phialocephala scopiformis]	F:hydrolase activity	0	no IPS match	NA	NA	72.9146	1	137.519	17.3333	357	252.188
DR_005942-RA	GH1	(Trans)glycosidase [Glarea lozoyensis ATCC 20868]	P:carbohydrate metabolic process; F:hydrolase activity, hydrolyzing O-glycosyl compounds	0	IPR013781 (G3DSA:3.20.20.GENE3D); IPR001360 (PFAM); IPR001360 (PANTHER); PTHR10353:SF53 (PANTHER); IPR017853 (SUPERFAMILY)	NA	NA	89.3405	2.66667	328.286	74	140.667	100.012
DR_005978-RA	GT15	glycosyltransferase family 15	F:pyridoxal phosphate binding; P:cell wall mannoprotein biosynthetic process; P:protein O-linked glycosylation; P:mannosylation; C:integral component of membrane; P:protein N-linked glycosylation; C:Golgi apparatus; F:alpha-1,2-mannosyltransferase activity	EC:2.4.1	IPR002685 (PFAM); IPR029044 (G3DSA:3.90.550.GENE3D); IPR002685 (PANTHER); PTHR31121:SF7 (PANTHER); IPR029044 (SUPERFAMILY)	NA	NA	NA	NA	8.2069	2.33333	32.6667	35.1199
DR_006033-RA	GH72	(Trans)glycosidase [Glarea lozoyensis ATCC 20868]	P:fungal-type cell wall organization; C:fungal-type cell wall; P:fungal-type cell wall (1->3)-beta-D-glucan biosynthetic process; C:anchored component of external side of plasma membrane; F:1,3-beta-glucanosyltransferase activity; F:hydrolase activity, acting on glycosyl bonds	0	IPR004886 (PFAM); IPR013781 (G3DSA:3.20.20.GENE3D); PTHR31468 (PANTHER); PTHR31468:SF4 (PANTHER); IPR017853 (SUPERFAMILY)	NA	NA	NA	NA	NA	NA	NA	NA
DR_006072-RA	GT4	mannosyltransferase [Marssonina brunnea multigermtubi MB_m1]	F:transferase activity, transferring glycosyl groups; C:integral component of membrane	0	IPR001296 (PFAM); G3DSA:3.40.50.2000 (GENE3D); PTHR12526:SF389 (PANTHER); PTHR12526 (PANTHER); SSF53756 (SUPERFAMILY)	120.146	1	NA	NA	26.1552	4.66667	4	3.36379
DR_006078-RA	GH76	glycoside hydrolase family 76	F:mannan endo-1,6-alpha-mannosidase activity; P:carbohydrate catabolic process; C:integral component of membrane; C:endoplasmic reticulum	EC:3.2.1.101	IPR012341 (G3DSA:1.50.10.GENE3D); IPR005198 (PFAM); PTHR12145:SF16 (PANTHER); PTHR12145 (PANTHER); IPR008928 (SUPERFAMILY)	NA	NA	NA	NA	NA	NA	NA	NA
DR_006082-RA	GH16	glycoside hydrolase family 16	C:cellular bud neck septin ring; P:fungal-type cell wall organization; F:chitin binding; F:transferase activity, transferring glycosyl groups; C:fungal-type cell wall; F:hydrolase activity, hydrolyzing O-glycosyl compounds; P:cell wall chitin metabolic process	0	IPR013320 (G3DSA:2.60.120.GENE3D); IPR000757 (PFAM); PTHR10963:SF22 (PANTHER); PTHR10963 (PANTHER); IPR000757 (PROSITE_PROFILES); IPR013320 (SUPERFAMILY)	NA	NA	NA	NA	NA	NA	15	13.0117
DR_006082-RA	CBM18	glycoside hydrolase family 16	C:cellular bud neck septin ring; P:fungal-type cell wall organization; F:chitin binding; F:transferase activity, transferring glycosyl groups; C:fungal-type cell wall; F:hydrolase activity, hydrolyzing O-glycosyl compounds; P:cell wall chitin metabolic process	0	IPR013320 (G3DSA:2.60.120.GENE3D); IPR000757 (PFAM); PTHR10963:SF22 (PANTHER); PTHR10963 (PANTHER); IPR000757 (PROSITE_PROFILES); IPR013320 (SUPERFAMILY)	NA	NA	NA	NA	NA	NA	15	13.0117
DR_006109-RA	PL3	pectate lyase	F:lyase activity	0	IPR012334 (G3DSA:2.160.20.GENE3D); IPR004898 (PFAM); PTHR33407 (PANTHER); PTHR33407:SF7 (PANTHER); IPR011050 (SUPERFAMILY)	NA	NA	NA	NA	NA	NA	2	3.41901
DR_006111-RA	PL1	pectate lyase B	P:polysaccharide catabolic process; F:lyase activity; C:extracellular region	0	IPR002022 (SMART); IPR002022 (PFAM); IPR012334 (G3DSA:2.160.20.GENE3D); PTHR31683:SF6 (PANTHER); PTHR31683 (PANTHER); IPR011050 (SUPERFAMILY)	NA	NA	NA	NA	NA	NA	NA	NA
DR_006141-RA	PL1	pectin lyase A precursor [Marssonina brunnea multigermtubi MB_m1]	P:polysaccharide catabolic process; F:lyase activity; C:extracellular region	0	IPR002022 (SMART); IPR012334 (G3DSA:2.160.20.GENE3D); IPR002022 (PFAM); PTHR31683 (PANTHER); PTHR31683:SF10 (PANTHER); IPR011050 (SUPERFAMILY)	NA	NA	67.0906	2	4.7589	1.33333	NA	NA
DR_006146-RA	GH135	cell surface	P:biological_process; C:membrane; C:integral component of membrane; C:cellular_component; F:molecular_function	0	IPR021986 (PFAM)	NA	NA	NA	NA	20.0369	3	22	34.8216
DR_006154-RA	GH53	arabinogalactan endo-1,4-beta-galactosidase [Marssonina brunnea multigermtubi MB_m1]	P:metabolic process; F:hydrolase activity, hydrolyzing O-glycosyl compounds	0	IPR011683 (PFAM); IPR013781 (G3DSA:3.20.20.GENE3D); PTHR34983:SF2 (PANTHER); PTHR34983 (PANTHER); IPR017853 (SUPERFAMILY)	NA	NA	NA	NA	24.9115	7	11	9.65662
DR_006176-RA	GH47	class I alpha-mannosidase	F:calcium ion binding; P:N-glycan processing; C:integral component of membrane; F:mannosyl-oligosaccharide 1,2-alpha-mannosidase activity; C:Golgi membrane; C:endoplasmic reticulum; P:ER-associated ubiquitin-dependent protein catabolic process	EC:3.2.1.113	IPR001382 (PRINTS); IPR001382 (G3DSA:1.50.10.GENE3D); IPR001382 (PFAM); PTHR11742:SF49 (PANTHER); PTHR11742 (PANTHER); PTHR11742 (PANTHER); PTHR11742:SF49 (PANTHER); IPR001382 (SUPERFAMILY)	NA	NA	NA	NA	18.823	2.66667	32.3333	25.5704
DR_006177-RA	GH12	xyloglucan-specific endoglucanase	F:hydrolase activity	0	IPR002594 (PFAM); IPR013319 (G3DSA:2.60.120.GENE3D); PTHR34002 (PANTHER); PTHR34002:SF3 (PANTHER); IPR013320 (SUPERFAMILY)	NA	NA	NA	NA	NA	NA	4.33333	4.21013
DR_006178-RA	GT2	Glycosyl [Penicillium digitatum Pd1]	C:integral component of membrane; F:transferase activity	0	IPR001173 (PFAM); IPR029044 (G3DSA:3.90.550.GENE3D); PTHR10587 (PANTHER); PTHR10587:SF87 (PANTHER); IPR029044 (SUPERFAMILY)	NA	NA	NA	NA	NA	NA	4.66667	3.33605
DR_006196-RA	GH75	fungal chitosanase	F:chitosanase activity; P:polysaccharide catabolic process; C:extracellular region	EC:3.2.1.132	IPR009939 (PFAM); PTHR42061:SF2 (PANTHER); PTHR42061 (PANTHER)	NA	NA	NA	NA	NA	NA	NA	NA
DR_006210-RA	GT57	dolichyl pyrophosphate Glc1Man9 c2 alpha-1,3-glucosyltransferase	C:endoplasmic reticulum membrane; F:transferase activity, transferring hexosyl groups; C:integral component of membrane	0	IPR004856 (PFAM); IPR004856 (PANTHER); PTHR12413:SF2 (PANTHER)	202.93	1.66667	NA	NA	19.0356	5.33333	9.33333	10.0219
DR_006224-RA	GT21	glycosyltransferase family 21	P:glucosylceramide biosynthetic process; F:ceramide glucosyltransferase activity; C:integral component of membrane	EC:2.4.1.80	PF13641 (PFAM); IPR029044 (G3DSA:3.90.550.GENE3D); PTHR12726:SF0 (PANTHER); PTHR12726 (PANTHER); PTHR12726:SF0 (PANTHER); IPR029044 (SUPERFAMILY)	NA	NA	61.7138	0.666667	33.0324	4	17.6667	14.3174
DR_006233-RA	CE10	BEM46 family	C:mitochondrion; C:integral component of membrane; C:endoplasmic reticulum; F:hydrolase activity	0	IPR022742 (PFAM); IPR029058 (G3DSA:3.40.50.GENE3D); PTHR12277 (PANTHER); IPR029058 (SUPERFAMILY)	NA	NA	NA	NA	NA	NA	15.6667	16.9521
DR_006241-RA	CE10	[Histoplasma capsulatum NAm1]	F:arylformamidase activity; P:'de novo' NAD biosynthetic process from tryptophan; P:tryptophan catabolic process to kynurenine	EC:3.5.1.9	IPR029058 (G3DSA:3.40.50.GENE3D); PTHR23024 (PANTHER); PTHR23024:SF147 (PANTHER); IPR029058 (SUPERFAMILY)	NA	NA	NA	NA	NA	NA	3.66667	4.31059
DR_006248-RA	GT62	mannan polymerase complexes MNN9 subunit [Marssonina brunnea multigermtubi MB_m1]	C:cis-Golgi network; P:mannosylation; F:alpha-1,6-mannosyltransferase activity; P:protein N-linked glycosylation; C:endoplasmic reticulum; P:negative regulation of G0 to G1 transition; C:alpha-1,6-mannosyltransferase complex	EC:2.4.1	PF03452 (PFAM); PTHR24319:SF35 (PANTHER); PTHR24319 (PANTHER)	NA	NA	106.517	2	61.4889	12	59.3333	55.0339
DR_006255-RA	CE1	prolyl oligopeptidase	P:proteolysis; F:serine-type peptidase activity	0	IPR011042 (G3DSA:2.120.10.GENE3D); IPR029058 (G3DSA:3.40.50.GENE3D); PTHR11731 (PANTHER); PTHR11731:SF150 (PANTHER); SSF82171 (SUPERFAMILY); IPR029058 (SUPERFAMILY)	NA	NA	NA	NA	23.6788	4	20.6667	11.7386
DR_006275-RA	AA2	ascorbate peroxidase [Marssonina brunnea multigermtubi MB_m1]	F:peroxidase activity; P:response to oxidative stress; F:metal ion binding; C:integral component of membrane; P:cellular oxidant detoxification; P:oxidation-reduction process; F:heme binding	EC:1.11.1.7	IPR002016 (PRINTS); IPR002207 (PRINTS); G3DSA:1.10.420.10 (GENE3D); G3DSA:1.10.520.10 (GENE3D); IPR002016 (PFAM); PTHR31356:SF7 (PANTHER); PTHR31356:SF7 (PANTHER); PTHR31356 (PANTHER); PTHR31356 (PANTHER); IPR002016 (PROSITE_PROFILES); IPR010255 (SUPERFAMILY)	397.693	5.33333	609.375	17	904.063	200.667	229.333	202.489
DR_006302-RA	GT20	glycosyltransferase family 20	P:trehalose biosynthetic process; F:transferase activity	0	IPR001830 (PFAM); G3DSA:3.40.50.2000 (GENE3D); G3DSA:3.40.50.2000 (GENE3D); IPR023214 (G3DSA:3.40.50.GENE3D); IPR003337 (PFAM); PTHR10788:SF15 (PANTHER); PTHR10788 (PANTHER); IPR023214 (SUPERFAMILY); SSF53756 (SUPERFAMILY)	89.1325	1	NA	NA	NA	NA	47	30.46
DR_006356-RA	GH3	beta-N-acetylglucosaminidase [Phialocephala scopiformis]	P:carbohydrate metabolic process; P:peptidoglycan turnover; C:membrane; F:hydrolase activity, hydrolyzing O-glycosyl compounds; F:N-acetyltransferase activity	EC:2.3.1	IPR001764 (PFAM); IPR001764 (G3DSA:3.20.20.GENE3D); PTHR30480 (PANTHER); PTHR30480:SF6 (PANTHER); IPR017853 (SUPERFAMILY)	NA	NA	NA	NA	NA	NA	26	19.9703
DR_006369-RA	GT41	UDP-N-acetylglucosaminyltransferase [Marssonina brunnea multigermtubi MB_m1]	F:transferase activity, transferring glycosyl groups	0	IPR019734 (SMART); IPR019734 (PFAM); IPR011990 (G3DSA:1.25.40.GENE3D); IPR019734 (PFAM); PTHR23083 (PANTHER); PTHR23083:SF421 (PANTHER); PTHR23083:SF421 (PANTHER); PTHR23083 (PANTHER); IPR019734 (PROSITE_PROFILES); IPR019734 (PROSITE_PROFILES); IPR013026 (PROSITE_PROFILES); IPR013026 (PROSITE_PROFILES); IPR019734 (PROSITE_PROFILES); IPR013026 (PROSITE_PROFILES); IPR019734 (PROSITE_PROFILES); IPR0…	178.265	2	NA	NA	8.35231	2.33333	29	14.6642
DR_006379-RA	GH109	oxidoreductase family [Marssonina brunnea multigermtubi MB_m1]	F:oxidoreductase activity; P:oxidation-reduction process	0	IPR004104 (PFAM); G3DSA:3.30.360.10 (GENE3D); IPR016040 (G3DSA:3.40.50.GENE3D); PTHR22604:SF53 (PANTHER); PTHR22604 (PANTHER); SSF55347 (SUPERFAMILY)	NA	NA	NA	NA	11.9457	3.33333	10	8.88891
DR_006438-RA	CE10	esterase lipase	P:metabolic process; F:hydrolase activity	0	IPR013094 (PFAM); IPR029058 (G3DSA:3.40.50.GENE3D); PTHR23024 (PANTHER); PTHR23024:SF41 (PANTHER); IPR029058 (SUPERFAMILY)	NA	NA	NA	NA	NA	NA	NA	NA
DR_006456-RA	CBM21	carbohydrate-Binding Module family 21	0	0	IPR005036 (PFAM); PTHR12307 (PANTHER); PTHR12307:SF18 (PANTHER); IPR005036 (PROSITE_PROFILES)	NA	NA	NA	NA	2.37945	0.666667	31.6667	19.5356
DR_006468-RA	CE10	alpha beta-hydrolase [Phialocephala scopiformis]	C:extracellular space; F:carboxylic ester hydrolase activity	EC:3.1.1.1	IPR002018 (PFAM); IPR029058 (G3DSA:3.40.50.GENE3D); PTHR11559:SF160 (PANTHER); PTHR11559 (PANTHER); IPR029058 (SUPERFAMILY)	NA	NA	89.4542	2.66667	259.684	56.6667	92	72.7084
DR_006473-RA	CE1	alpha beta-Hydrolase [Glarea lozoyensis ATCC 20868]	F:catalytic activity	0	IPR000639 (PRINTS); IPR029058 (G3DSA:3.40.50.GENE3D); PTHR10992:SF890 (PANTHER); PTHR10992 (PANTHER); PTHR10992:SF890 (PANTHER); IPR029058 (SUPERFAMILY)	NA	NA	72.9524	1	NA	NA	5	5.1203
DR_006474-RA	GH47	class i alpha-mannosidase	F:calcium ion binding; P:N-glycan processing; C:integral component of membrane; F:mannosyl-oligosaccharide 1,2-alpha-mannosidase activity; C:Golgi membrane; C:endoplasmic reticulum; P:ER-associated ubiquitin-dependent protein catabolic process	EC:3.2.1.113	IPR001382 (PRINTS); IPR001382 (PFAM); IPR001382 (G3DSA:1.50.10.GENE3D); PTHR11742:SF49 (PANTHER); PTHR11742 (PANTHER); IPR001382 (SUPERFAMILY)	NA	NA	NA	NA	NA	NA	14.3333	10.9335
DR_006500-RA	GH43	glycoside hydrolase family 43 [Myceliophthora thermophila ATCC 42464]	F:hydrolase activity	0	IPR023296 (G3DSA:2.115.10.GENE3D); IPR006710 (PANTHER); PTHR22925:SF39 (PANTHER); IPR023296 (SUPERFAMILY)	NA	NA	NA	NA	NA	NA	2	1.94674
DR_006506-RA	AA3	FAD NAD(P)-binding [Glarea lozoyensis ATCC 20868]	F:oxidoreductase activity, acting on CH-OH group of donors; F:flavin adenine dinucleotide binding; P:oxidation-reduction process	0	IPR023753 (G3DSA:3.50.50.GENE3D); G3DSA:3.30.560.10 (GENE3D); IPR000172 (PFAM); PTHR11552:SF134 (PANTHER); PTHR11552 (PANTHER); IPR023753 (SUPERFAMILY)	NA	NA	NA	NA	NA	NA	3	3.75124
DR_006522-RA	CE4	polysaccharide deacetylase family [Marssonina brunnea multigermtubi MB_m1]	F:hydrolase activity, acting on carbon-nitrogen (but not peptide) bonds; P:carbohydrate metabolic process	0	IPR002509 (PFAM); IPR002509 (G3DSA:3.20.20.GENE3D); PTHR10587 (PANTHER); PTHR10587:SF76 (PANTHER); IPR002509 (PROSITE_PROFILES); IPR011330 (SUPERFAMILY)	NA	NA	NA	NA	2.37945	0.666667	6.33333	4.58407
DR_006582-RA	GH38	glycosyl hydrolase family 38	P:protein deglycosylation; F:alpha-mannosidase activity; F:zinc ion binding; C:fungal-type vacuole membrane; P:mannose metabolic process; F:carbohydrate binding	EC:3.2.1.24	IPR015341 (SMART); IPR027291 (G3DSA:3.20.110.GENE3D); IPR015341 (PFAM); IPR015341 (G3DSA:1.20.1270.GENE3D); IPR000602 (PFAM); PTHR11607:SF15 (PANTHER); PTHR11607 (PANTHER); IPR011330 (SUPERFAMILY); IPR028995 (SUPERFAMILY)	NA	NA	33.5643	1	71.0849	12	57.6667	32.3962
DR_006687-RA	GH18	chitinase [Phialocephala scopiformis]	F:chitinase activity; P:carbohydrate metabolic process; F:chitin binding; P:chitin catabolic process; C:extracellular region	EC:3.2.1.14	IPR011583 (SMART); IPR029070 (G3DSA:3.10.50.GENE3D); IPR013781 (G3DSA:3.20.20.GENE3D); IPR001223 (PFAM); PTHR11177 (PANTHER); IPR029070 (SUPERFAMILY); IPR017853 (SUPERFAMILY)	232.582	2	151.168	3.33333	94.9763	18.6667	59	45.842
DR_006691-RA	GH64	glucanase b	C:membrane	0	IPR032477 (PFAM); PTHR38165:SF1 (PANTHER); PTHR38165 (PANTHER)	NA	NA	NA	NA	NA	NA	NA	NA
DR_006705-RA	GH47	glycoside hydrolase family 47	P:endoplasmic reticulum unfolded protein response; P:glycoprotein ERAD pathway; F:calcium ion binding; P:N-glycan processing; C:integral component of membrane; F:mannosyl-oligosaccharide 1,2-alpha-mannosidase activity; C:endoplasmic reticulum; P:ER-associated ubiquitin-dependent protein catabolic process	EC:3.2.1.113	IPR001382 (PRINTS); IPR001382 (G3DSA:1.50.10.GENE3D); IPR001382 (PFAM); PTHR11742 (PANTHER); PTHR11742 (PANTHER); PTHR11742 (PANTHER); PTHR11742:SF25 (PANTHER); PTHR11742:SF25 (PANTHER); PTHR11742:SF25 (PANTHER); IPR001382 (SUPERFAMILY)	NA	NA	NA	NA	25.0085	7	62	34.1196
DR_006716-RA	GH5	Glucan 1,3-beta-glucosidase [Marssonina brunnea multigermtubi MB_m1]	P:glucan metabolic process; C:cell part; P:cell wall organization; F:hydrolase activity, hydrolyzing O-glycosyl compounds	0	IPR013781 (G3DSA:3.20.20.GENE3D); PTHR31297:SF12 (PANTHER); PTHR31297 (PANTHER); IPR017853 (SUPERFAMILY)	NA	NA	33.5264	1	NA	NA	2.66667	1.36922
DR_006720-RA	GT22	glycosyltransferase family 22	F:mannosyltransferase activity; C:integral component of membrane; P:protein N-linked glycosylation; C:endoplasmic reticulum	EC:2.4.1	IPR005599 (PFAM); IPR005599 (PANTHER); IPR005599 (PANTHER); PTHR22760:SF1 (PANTHER); PTHR22760:SF1 (PANTHER)	NA	NA	NA	NA	5.92439	1.66667	11.3333	9.35503
DR_006778-RA	GH17	beta-glucosidase [Marssonina brunnea multigermtubi MB_m1]	P:metabolic process; F:hydrolase activity	0	IPR013781 (G3DSA:3.20.20.GENE3D); PTHR16631:SF15 (PANTHER); PTHR16631 (PANTHER); IPR017853 (SUPERFAMILY)	NA	NA	NA	NA	NA	NA	NA	NA
DR_006802-RA	GT8	glycosyltransferase family 8	F:transferase activity, transferring glycosyl groups; C:membrane; C:Golgi apparatus	0	IPR029044 (G3DSA:3.90.550.GENE3D); IPR029044 (SUPERFAMILY)	NA	NA	NA	NA	NA	NA	NA	NA
DR_006862-RA	GT35	starch phosphorylase	F:glycogen phosphorylase activity; F:pyridoxal phosphate binding; C:cytoplasm; P:glycogen catabolic process	0	G3DSA:3.40.50.2000 (GENE3D); PTHR11468:SF3 (PANTHER); IPR000811 (PANTHER); SSF53756 (SUPERFAMILY)	NA	NA	112.303	1	21.3963	3.33333	49.6667	30.8107
DR_006887-RA	GH18	chitinase [Marssonina brunnea multigermtubi MB_m1]	P:carbohydrate metabolic process; P:macromolecule catabolic process; F:hydrolase activity, hydrolyzing O-glycosyl compounds	0	IPR029070 (G3DSA:3.10.50.GENE3D); IPR013781 (G3DSA:3.20.20.GENE3D); IPR001223 (PFAM); PTHR11177 (PANTHER); IPR029070 (SUPERFAMILY); IPR017853 (SUPERFAMILY)	NA	NA	346.465	10.3333	442.532	90	275	219.878
DR_006912-RA	GT31	glyco -N-acetylgalactosamine 3-beta-galactosyltransferase 1	C:integral component of membrane	0	PTHR23033 (PANTHER); PTHR23033 (PANTHER); PTHR23033:SF18 (PANTHER); PTHR23033:SF18 (PANTHER)	NA	NA	NA	NA	NA	NA	6.33333	4.95414
DR_006921-RA	AA3	GMC oxidoreductase	F:oxidoreductase activity, acting on CH-OH group of donors; F:oxidoreductase activity; F:flavin adenine dinucleotide binding; P:oxidation-reduction process	0	IPR023753 (G3DSA:3.50.50.GENE3D); IPR000172 (PFAM); PTHR11552 (PANTHER); PTHR11552:SF78 (PANTHER); IPR023753 (SUPERFAMILY)	NA	NA	NA	NA	NA	NA	4	3.8052
DR_006947-RA	GH76	glycoside hydrolase family 76	C:membrane; P:metabolic process; C:endoplasmic reticulum; F:hydrolase activity, acting on glycosyl bonds	0	IPR012341 (G3DSA:1.50.10.GENE3D); IPR005198 (PFAM); PTHR12145 (PANTHER); PTHR12145:SF16 (PANTHER); IPR008928 (SUPERFAMILY)	NA	NA	NA	NA	NA	NA	16.6667	11.3596
DR_006952-RA	GH3	glycoside hydrolase family 3	P:glucan catabolic process; C:integral component of membrane; F:beta-glucosidase activity; C:plasma membrane	EC:3.2.1.21	IPR001764 (PRINTS); IPR026891 (SMART); IPR002772 (G3DSA:3.40.50.GENE3D); IPR002772 (PFAM); IPR001764 (G3DSA:3.20.20.GENE3D); IPR026891 (PFAM); IPR001764 (PFAM); PTHR30620:SF44 (PANTHER); PTHR30620:SF44 (PANTHER); IPR026892 (PANTHER); PTHR30620:SF44 (PANTHER); IPR026892 (PANTHER); IPR002772 (SUPERFAMILY); IPR017853 (SUPERFAMILY)	268.759	2.66667	NA	NA	NA	NA	24	16.1432
DR_006959-RA	GH92	glycoside hydrolase family 92	P:carbohydrate metabolic process; F:carbohydrate binding; F:hydrolase activity	0	IPR012939 (PFAM); IPR014718 (G3DSA:2.70.98.GENE3D); PTHR12143:SF22 (PANTHER); PTHR12143 (PANTHER)	NA	NA	NA	NA	63.0609	15	28.6667	17.4061
DR_006961-RA	CE2	[Marssonina brunnea multigermtubi MB_m1]	C:nucleus; P:regulation of vacuole fusion, non-autophagic; P:vesicle-mediated transport; C:cytoplasm; C:membrane; C:integral component of membrane; C:cytosol	0	no IPS match	NA	NA	NA	NA	NA	NA	NA	NA
DR_006981-RA	GH78	bacterial alpha-l-rhamnosidase domain	F:catalytic activity	0	PTHR34987 (PANTHER); PTHR34987:SF1 (PANTHER); IPR008928 (SUPERFAMILY)	NA	NA	NA	NA	6.02134	1.66667	19.6667	13.0918
DR_006998-RA	GT50	glycosyltransferase family 50	P:GPI anchor biosynthetic process; F:transferase activity, transferring hexosyl groups; C:integral component of membrane	0	IPR007704 (PFAM); PTHR12886:SF0 (PANTHER); IPR007704 (PANTHER)	NA	NA	NA	NA	23.6788	4	8.66667	8.13519
DR_007038-RA	GH16	Crh [Marssonina brunnea multigermtubi MB_m1]	C:fungal-type cell wall; C:membrane; P:metabolic process; F:IgE binding; P:cell wall organization; F:hydrolase activity, acting on glycosyl bonds	0	IPR013320 (G3DSA:2.60.120.GENE3D); PTHR10963 (PANTHER); PTHR10963:SF35 (PANTHER); IPR013320 (SUPERFAMILY)	533.715	4.33333	1488.84	37.3333	692.491	149	236	211.365
DR_007125-RA	GT8	galactinol synthase [Fusarium fujikuroi]	F:transferase activity, transferring glycosyl groups	0	IPR002495 (PFAM); IPR029044 (G3DSA:3.90.550.GENE3D); PTHR11183:SF43 (PANTHER); PTHR11183 (PANTHER); IPR029044 (SUPERFAMILY)	NA	NA	NA	NA	NA	NA	NA	NA
DR_007133-RA	GT71	glycosyltransferase family 71	F:transferase activity, transferring glycosyl groups; P:mycelium development; C:membrane; P:protein glycosylation	0	IPR029044 (G3DSA:3.90.550.GENE3D); IPR022751 (PFAM); PTHR31646:SF1 (PANTHER); PTHR31646 (PANTHER); IPR029044 (SUPERFAMILY)	NA	NA	NA	NA	NA	NA	5.33333	4.72236
DR_007151-RA	AA8	GMC oxidoreductase	F:organic cyclic compound binding; F:heterocyclic compound binding; F:oxidoreductase activity; C:membrane; P:metabolic process	0	IPR016040 (G3DSA:3.40.50.GENE3D); IPR015920 (PFAM); G3DSA:3.30.410.10 (GENE3D); IPR015920 (G3DSA:2.60.40.GENE3D); IPR016040 (G3DSA:3.40.50.GENE3D); IPR000172 (PFAM); PTHR11552 (PANTHER); PTHR11552:SF57 (PANTHER); IPR023753 (SUPERFAMILY); SSF49344 (SUPERFAMILY); SSF54373 (SUPERFAMILY)	NA	NA	111.818	3.33333	93.6764	13	226.667	149.265
DR_007177-RA	GH109	NAD(P)-binding Rossmann-fold containing [Glarea lozoyensis ATCC 20868]	F:oxidoreductase activity; P:oxidation-reduction process	0	IPR016040 (G3DSA:3.40.50.GENE3D); IPR000683 (PFAM); G3DSA:3.30.360.10 (GENE3D); IPR004104 (PFAM); PTHR22604:SF128 (PANTHER); PTHR22604 (PANTHER); PTHR22604 (PANTHER); PTHR22604 (PANTHER); PTHR22604:SF128 (PANTHER); SSF55347 (SUPERFAMILY); IPR016040 (SUPERFAMILY)	NA	NA	NA	NA	NA	NA	4.66667	2.36326
DR_007185-RA	CE1	ab-hydrolase associated lipase region	P:lipid metabolic process; C:integral component of membrane; F:hydrolase activity	0	IPR000073 (PFAM); IPR029058 (G3DSA:3.40.50.GENE3D); PTHR11005 (PANTHER); PTHR11005:SF9 (PANTHER); IPR029058 (SUPERFAMILY)	NA	NA	NA	NA	8.25537	2.33333	12.6667	8.59008
DR_007188-RA	GH78	hypothetical protein V502_10960	F:catalytic activity	0	IPR008979 (G3DSA:2.60.120.GENE3D); PTHR34987 (PANTHER); PTHR34987:SF1 (PANTHER)	NA	NA	NA	NA	NA	NA	2	1.54218
DR_007227-RA	GH51	alpha-N-arabinofuranosidase C [Marssonina brunnea multigermtubi MB_m1]	P:L-arabinose metabolic process; C:membrane; F:alpha-L-arabinofuranosidase activity	EC:3.2.1.55	IPR010720 (SMART); IPR010720 (PFAM); IPR013781 (G3DSA:3.20.20.GENE3D); PTHR31776 (PANTHER); PTHR31776:SF4 (PANTHER); PTHR31776 (PANTHER); PTHR31776:SF4 (PANTHER); IPR017853 (SUPERFAMILY); SSF51011 (SUPERFAMILY)	NA	NA	NA	NA	18.726	2.66667	13	9.63704
DR_007233-RA	GH16	glycoside hydrolase family 16	P:carbohydrate metabolic process; C:integral component of membrane; F:hydrolase activity, hydrolyzing O-glycosyl compounds	0	IPR005629 (PFAM); IPR013320 (G3DSA:2.60.120.GENE3D); PTHR31361 (PANTHER); PTHR31361:SF12 (PANTHER); IPR000757 (PROSITE_PROFILES); IPR013320 (SUPERFAMILY)	NA	NA	NA	NA	NA	NA	NA	NA
DR_007238-RA	GT34	galactosyl transferase GMA12 MNN10 family [Marssonina brunnea multigermtubi MB_m1]	P:cell wall mannoprotein biosynthetic process; P:mannosylation; F:alpha-1,6-mannosyltransferase activity; P:protein N-linked glycosylation; C:endoplasmic reticulum; C:alpha-1,6-mannosyltransferase complex	EC:2.4.1	IPR008630 (PFAM); PTHR31306 (PANTHER); PTHR31306:SF4 (PANTHER)	NA	NA	44.7271	1.33333	48.4934	11	26	24.5495
DR_007259-RA	GH28	polygalacturonase 2 [Phialocephala scopiformis]	P:metabolic process; F:hydrolase activity, acting on glycosyl bonds	0	IPR006626 (SMART); IPR000743 (PFAM); IPR012334 (G3DSA:2.160.20.GENE3D); PTHR31884:SF1 (PANTHER); PTHR31884 (PANTHER); IPR011050 (SUPERFAMILY)	NA	NA	72.8767	1	NA	NA	NA	NA
DR_007272-RA	GH3	glycosyl hydrolase family 3 N terminal domain-containing [Marssonina brunnea multigermtubi MB_m1]	C:nucleus; F:DNA binding; F:ATP binding; P:DNA replication initiation; F:DNA helicase activity; P:DNA duplex unwinding; F:beta-glucosidase activity; C:MCM complex; P:cellulose catabolic process; C:plasma membrane; F:scopolin beta-glucosidase activity	EC:3.2.1.21	IPR011658 (SMART); IPR011658 (G3DSA:3.90.182.GENE3D); IPR011658 (PFAM); SSF56988 (SUPERFAMILY)	NA	NA	NA	NA	89.5388	17.3333	89	54.3397
DR_007288-RA	CE5	alpha beta-Hydrolase [Glarea lozoyensis ATCC 20868]	P:metabolic process; C:extracellular region; F:cutinase activity; F:carboxylic ester hydrolase activity; F:hydrolase activity	0	IPR029058 (G3DSA:3.40.50.GENE3D); IPR000675 (PFAM); PTHR15087 (PANTHER); PTHR15087:SF13 (PANTHER); PTHR15087:SF13 (PANTHER); IPR029058 (SUPERFAMILY)	NA	NA	NA	NA	NA	NA	4.33333	4.07557
DR_007306-RA	GH125	DUF1237 domain [Marssonina brunnea multigermtubi MB_m1]	P:metabolic process; C:endoplasmic reticulum; F:hydrolase activity, acting on glycosyl bonds	0	IPR008313 (SMART); IPR008313 (PFAM); IPR008313 (PIRSF); IPR012341 (G3DSA:1.50.10.GENE3D); PTHR31047:SF0 (PANTHER); PTHR31047 (PANTHER); IPR008928 (SUPERFAMILY)	NA	NA	134.219	4	72.9665	17.6667	46.3333	33.0997
DR_007345-RA	AA3	[Nectria haematococca mpVI 77-13-4]	F:oxidoreductase activity, acting on CH-OH group of donors; F:oxidoreductase activity; F:flavin adenine dinucleotide binding; P:oxidation-reduction process	0	IPR000172 (PFAM); IPR023753 (G3DSA:3.50.50.GENE3D); G3DSA:3.30.560.10 (GENE3D); PTHR11552:SF117 (PANTHER); PTHR11552 (PANTHER); IPR023753 (SUPERFAMILY)	NA	NA	NA	NA	NA	NA	NA	NA
DR_007349-RA	AA3	glucose oxidase	F:oxidoreductase activity, acting on CH-OH group of donors	0	IPR023753 (G3DSA:3.50.50.GENE3D); G3DSA:3.30.560.10 (GENE3D); IPR007867 (PFAM); PTHR11552 (PANTHER); PTHR11552:SF102 (PANTHER); SSF54373 (SUPERFAMILY); IPR023753 (SUPERFAMILY)	NA	NA	NA	NA	NA	NA	11	8.0297
DR_007354-RA	GH12	xyloglucan-specific endo-beta-1,4-glucanase A	F:hydrolase activity	0	IPR013319 (G3DSA:2.60.120.GENE3D); IPR002594 (PFAM); PTHR34002:SF5 (PANTHER); PTHR34002:SF5 (PANTHER); PTHR34002:SF5 (PANTHER); PTHR34002 (PANTHER); PTHR34002 (PANTHER); IPR013320 (SUPERFAMILY); IPR013320 (SUPERFAMILY)	NA	NA	NA	NA	NA	NA	NA	NA
DR_007387-RA	CE3	GDSL [Penicillium expansum]	F:hydrolase activity	0	IPR013830 (PFAM); IPR013830 (G3DSA:3.40.50.GENE3D); PTHR30383:SF4 (PANTHER); PTHR30383 (PANTHER); IPR013830 (SUPERFAMILY)	NA	NA	NA	NA	NA	NA	9.33333	12.0816
DR_007427-RA	GH125	duf1237 domain-containing	F:catalytic activity	0	IPR012341 (G3DSA:1.50.10.GENE3D); IPR008313 (PFAM); PTHR31047 (PANTHER); PTHR31047:SF1 (PANTHER); IPR008928 (SUPERFAMILY)	NA	NA	NA	NA	NA	NA	35	36.124
DR_007472-RA	AA7	FAD-binding domain-containing [Phialocephala scopiformis]	F:oxidoreductase activity, acting on CH-OH group of donors; F:flavin adenine dinucleotide binding; P:oxidation-reduction process	0	IPR012951 (PFAM); IPR016169 (G3DSA:3.30.465.GENE3D); IPR006094 (PFAM); PTHR11748 (PANTHER); PTHR11748:SF99 (PANTHER); IPR016166 (PROSITE_PROFILES); IPR016166 (SUPERFAMILY)	NA	NA	NA	NA	NA	NA	2.66667	1.89801
DR_007474-RA	GT8	Nucleotide-diphospho-sugar transferase [Glarea lozoyensis ATCC 20868]	F:acetylglucosaminyltransferase activity; C:membrane; P:protein N-linked glycosylation; C:Golgi apparatus	EC:2.4.1	IPR029044 (G3DSA:3.90.550.GENE3D); IPR030518 (PTHR11183:PANTHER); PTHR11183 (PANTHER); IPR029044 (SUPERFAMILY)	NA	NA	NA	NA	NA	NA	NA	NA
DR_007484-RA	PL1	polysaccharide lyase family 1	P:carbohydrate metabolic process; F:lyase activity	0	IPR012334 (G3DSA:2.160.20.GENE3D); IPR002022 (PFAM); PTHR31683:SF6 (PANTHER); PTHR31683 (PANTHER); IPR011050 (SUPERFAMILY)	NA	NA	NA	NA	NA	NA	NA	NA
DR_007507-RA	AA9	glycoside hydrolase family 61	F:catalytic activity	0	no IPS match	NA	NA	NA	NA	NA	NA	NA	NA
DR_007531-RA	GH128	G alpha subunit	F:GTP binding; F:G-protein coupled receptor binding; C:heterotrimeric G-protein complex; F:GTPase activity; P:adenylate cyclase-modulating G-protein coupled receptor signaling pathway; F:G-protein beta/gamma-subunit complex binding; F:signal transducer activity	0	IPR002975 (PRINTS); IPR001019 (SMART); IPR027417 (G3DSA:3.40.50.GENE3D); IPR001019 (PFAM); IPR001019 (PANTHER); PTHR10218:SF121 (PANTHER); IPR027417 (SUPERFAMILY)	89.1325	1	55.9278	1.66667	47.7829	13.3333	75	67.5983
DR_007582-RA	GH65	acid trehalase	P:carbohydrate metabolic process; F:catalytic activity; F:carbohydrate binding; F:hydrolase activity	0	IPR012341 (G3DSA:1.50.10.GENE3D); IPR005195 (PFAM); IPR005196 (G3DSA:2.70.98.GENE3D); IPR005196 (PFAM); PTHR11051 (PANTHER); PTHR11051 (PANTHER); PTHR11051:SF8 (PANTHER); PTHR11051:SF8 (PANTHER); IPR008928 (SUPERFAMILY); IPR008928 (SUPERFAMILY); IPR011013 (SUPERFAMILY)	188.697	1.33333	NA	NA	4.80738	1.33333	4.66667	2.82901
DR_007582-RA	GH65	acid trehalase	P:carbohydrate metabolic process; F:catalytic activity; F:carbohydrate binding; F:hydrolase activity	0	IPR012341 (G3DSA:1.50.10.GENE3D); IPR005195 (PFAM); IPR005196 (G3DSA:2.70.98.GENE3D); IPR005196 (PFAM); PTHR11051 (PANTHER); PTHR11051 (PANTHER); PTHR11051:SF8 (PANTHER); PTHR11051:SF8 (PANTHER); IPR008928 (SUPERFAMILY); IPR008928 (SUPERFAMILY); IPR011013 (SUPERFAMILY)	188.697	1.33333	NA	NA	4.80738	1.33333	4.66667	2.82901
DR_007649-RA	GT69	polysaccharide export [Marssonina brunnea multigermtubi MB_m1]	C:membrane; C:integral component of membrane; F:transferase activity	0	IPR021047 (PFAM); PTHR34144 (PANTHER); PTHR34144:SF5 (PANTHER)	NA	NA	NA	NA	NA	NA	7.66667	7.43374
DR_007652-RA	GT66	dolichyl-diphosphooligosaccharide- glycosyltransferase	C:mitochondrial proton-transporting ATP synthase complex, coupling factor F(o); C:oligosaccharyltransferase complex; F:hydrogen ion transmembrane transporter activity; C:integral component of membrane; P:protein N-linked glycosylation; P:ATP synthesis coupled proton transport; F:oligosaccharyl transferase activity	EC:2.4.1	IPR003674 (PFAM); PTHR13872:SF1 (PANTHER); PTHR13872 (PANTHER)	187.335	1.66667	140.043	3	67.6744	16.3333	197.333	89.5541
DR_007665-RA	GH45	glycosyl hydrolase family 45 [Marssonina brunnea multigermtubi MB_m1]	P:carbohydrate metabolic process; F:binding; F:cellulase activity	EC:3.2.1.4	IPR000254 (SMART); IPR000254 (PFAM); IPR009009 (G3DSA:2.40.40.GENE3D); IPR000334 (PFAM); PTHR39730 (PANTHER); IPR000254 (PRODOM); IPR000254 (PROSITE_PROFILES); IPR000254 (SUPERFAMILY); IPR009009 (SUPERFAMILY)	NA	NA	NA	NA	NA	NA	NA	NA
DR_007665-RA	GH45	glycosyl hydrolase family 45 [Marssonina brunnea multigermtubi MB_m1]	P:carbohydrate metabolic process; F:binding; F:cellulase activity	EC:3.2.1.4	IPR000254 (SMART); IPR000254 (PFAM); IPR009009 (G3DSA:2.40.40.GENE3D); IPR000334 (PFAM); PTHR39730 (PANTHER); IPR000254 (PRODOM); IPR000254 (PROSITE_PROFILES); IPR000254 (SUPERFAMILY); IPR009009 (SUPERFAMILY)	NA	NA	NA	NA	NA	NA	NA	NA
DR_007665-RA	CBM1	glycosyl hydrolase family 45 [Marssonina brunnea multigermtubi MB_m1]	P:carbohydrate metabolic process; F:binding; F:cellulase activity	EC:3.2.1.4	IPR000254 (SMART); IPR000254 (PFAM); IPR009009 (G3DSA:2.40.40.GENE3D); IPR000334 (PFAM); PTHR39730 (PANTHER); IPR000254 (PRODOM); IPR000254 (PROSITE_PROFILES); IPR000254 (SUPERFAMILY); IPR009009 (SUPERFAMILY)	NA	NA	NA	NA	NA	NA	NA	NA
DR_007666-RA	AA8	FAD NAD(P)-binding [Glarea lozoyensis ATCC 20868]	P:carbohydrate metabolic process; F:oxidoreductase activity, acting on CH-OH group of donors; F:flavin adenine dinucleotide binding; P:oxidation-reduction process; C:extracellular region; F:hydrolase activity, hydrolyzing O-glycosyl compounds; F:cellulose binding	0	G3DSA:3.30.410.10 (GENE3D); IPR000172 (PFAM); IPR023753 (G3DSA:3.50.50.GENE3D); PTHR11552:SF110 (PANTHER); PTHR11552 (PANTHER); SSF54373 (SUPERFAMILY); IPR023753 (SUPERFAMILY)	NA	NA	33.5264	1	109.519	12.3333	98.6667	78.0821
DR_007676-RA	GT4	glycosyl transferase [Marssonina brunnea multigermtubi MB_m1]	C:integral component of membrane; F:transferase activity	0	no IPS match	595.742	4.33333	212.958	4	62.8967	12.3333	145	60.8492
DR_007678-RA	PL3	pectate lyase [Neofusicoccum parvum UCRNP2]	F:pectate lyase activity; F:lyase activity; C:extracellular region	0	IPR012334 (G3DSA:2.160.20.GENE3D); IPR004898 (PFAM); PTHR33407:SF7 (PANTHER); PTHR33407 (PANTHER); IPR011050 (SUPERFAMILY)	NA	NA	117.642	2.33333	30.7202	6	8	9.19953
DR_007683-RA	AA9	glycoside hydrolase family 61	C:membrane; P:oxidation-reduction process; F:4 iron, 4 sulfur cluster binding; F:oxidoreductase activity, acting on NAD(P)H; F:hydrolase activity	0	IPR005103 (PFAM); PTHR33353 (PANTHER)	NA	NA	NA	NA	NA	NA	NA	NA
DR_007688-RA	GH28	endopolygalacturonase partial [Botrytis cinerea]	P:carbohydrate metabolic process; F:polygalacturonase activity; P:cell wall organization; C:extracellular region	EC:3.2.1.15	IPR006626 (SMART); IPR000743 (PFAM); IPR012334 (G3DSA:2.160.20.GENE3D); PTHR31884 (PANTHER); PTHR31884:SF1 (PANTHER); IPR011050 (SUPERFAMILY)	NA	NA	NA	NA	41.2206	3.66667	47	50.9472
DR_007698-RA	GH3	glycosyl hydrolase family 3 N terminal domain-containing	F:nucleotide binding; P:DNA replication; F:beta-glucosidase activity; F:helicase activity; P:cellulose catabolic process; C:plasma membrane; F:scopolin beta-glucosidase activity	EC:3.2.1.21	IPR011658 (SMART); IPR011658 (G3DSA:3.90.182.GENE3D); IPR011658 (PFAM); SSF56988 (SUPERFAMILY)	98.203	0.666667	89.4163	2.66667	152.834	24.3333	85	52.3005
DR_007713-RA	GH28	Pectin lyase [Glarea lozoyensis ATCC 20868]	P:metabolic process; F:hydrolase activity, acting on glycosyl bonds	0	IPR006626 (SMART); IPR012334 (G3DSA:2.160.20.GENE3D); IPR000743 (PFAM); PTHR31884 (PANTHER); PTHR31884:SF1 (PANTHER); IPR011050 (SUPERFAMILY)	NA	NA	NA	NA	NA	NA	NA	NA
DR_007759-RA	GH13	alpha amylase	P:carbohydrate metabolic process; F:hydrolase activity	0	IPR006047 (SMART); IPR006047 (PFAM); G3DSA:3.90.400.10 (GENE3D); IPR013781 (G3DSA:3.20.20.GENE3D); PTHR10357:SF136 (PANTHER); IPR015902 (PANTHER); IPR017853 (SUPERFAMILY)	NA	NA	33.5264	1	15.4907	4.33333	264	253.567
DR_007766-RA	GT32	alpha-1,6-mannosyltransferase Och1 [Marssonina brunnea multigermtubi MB_m1]	F:transferase activity, transferring glycosyl groups; C:membrane; C:integral component of membrane; F:transferase activity	0	IPR007577 (PFAM); PTHR31834:SF7 (PANTHER); PTHR31834 (PANTHER); IPR029044 (SUPERFAMILY)	NA	NA	111.856	3.33333	52.1353	12	30.6667	22.1912
DR_007792-RA	AA8	GMC oxidoreductase	F:oxidoreductase activity, acting on CH-OH group of donors; F:flavin adenine dinucleotide binding; C:membrane; P:oxidation-reduction process; P:response to stimulus	0	IPR007867 (PFAM); IPR023753 (G3DSA:3.50.50.GENE3D); IPR015920 (PFAM); IPR015920 (G3DSA:2.60.40.GENE3D); IPR000172 (PFAM); PTHR11552 (PANTHER); PTHR11552:SF57 (PANTHER); SSF54373 (SUPERFAMILY); IPR023753 (SUPERFAMILY); SSF49344 (SUPERFAMILY)	NA	NA	NA	NA	NA	NA	8.66667	6.32494
DR_007815-RA	CE10	alpha beta-hydrolase [Phialocephala scopiformis]	P:metabolic process; F:hydrolase activity	0	no IPS match	120.146	1	61.7138	0.666667	23.6976	6.66667	20.6667	18.6358
DR_007819-RA	AA2	WSC domain containing	F:oxidoreductase activity; F:binding; P:response to stimulus	0	IPR002889 (PFAM)	NA	NA	NA	NA	NA	NA	4.66667	2.82787
DR_007872-RA	AA9	cellulose-growth-specific	F:hydrolase activity	0	IPR005103 (PFAM); PTHR33353:SF6 (PANTHER); PTHR33353 (PANTHER)	NA	NA	NA	NA	NA	NA	16.3333	18.1592
DR_007876-RA	GH15	glycosyl hydrolase family 15 [Marssonina brunnea multigermtubi MB_m1]	P:carbohydrate catabolic process; F:hydrolase activity, hydrolyzing O-glycosyl compounds; C:intracellular part	0	IPR012341 (G3DSA:1.50.10.GENE3D); IPR011613 (PFAM); PTHR31616 (PANTHER); PTHR31616:SF0 (PANTHER); IPR008928 (SUPERFAMILY)	NA	NA	NA	NA	NA	NA	14.6667	10.0346
DR_007958-RA	CE12	carbohydrate esterase family 12	F:hydrolase activity	0	IPR013830 (G3DSA:3.40.50.GENE3D); IPR013830 (PFAM); PTHR31321 (PANTHER); PTHR31321:SF28 (PANTHER); IPR013830 (SUPERFAMILY)	NA	NA	626.884	14	272.967	50.3333	82.6667	69.5994
DR_007964-RA	GH78	glycoside hydrolase family 78	F:hydrolase activity	0	IPR012341 (G3DSA:1.50.10.GENE3D); IPR008902 (PFAM); PTHR34987:SF1 (PANTHER); PTHR34987 (PANTHER); IPR008928 (SUPERFAMILY)	NA	NA	NA	NA	27.0111	2.33333	1.66667	0.882241
DR_007967-RA	AA5	copper radical oxidase [Marssonina brunnea multigermtubi MB_m1]	P:carbohydrate metabolic process; C:membrane; C:integral component of membrane; F:hydrolase activity, hydrolyzing O-glycosyl compounds; C:extracellular region	0	IPR015916 (G3DSA:2.130.10.GENE3D); IPR009880 (PFAM); PTHR32208 (PANTHER); PTHR32208:SF9 (PANTHER); IPR011043 (SUPERFAMILY)	NA	NA	NA	NA	NA	NA	6.33333	3.20354
DR_007989-RA	AA2	catalase-peroxidase 2	F:peroxidase activity; P:metabolic process; F:binding; C:intracellular; P:cellular process; P:response to stimulus	EC:1.11.1.7	IPR002016 (PFAM); G3DSA:1.10.420.10 (GENE3D); G3DSA:1.10.520.10 (GENE3D); PTHR30555 (PANTHER); PTHR30555:SF0 (PANTHER); IPR010255 (SUPERFAMILY)	NA	NA	235.321	4.66667	20.298	5.66667	19.6667	13.3427
DR_007989-RA	AA2	catalase-peroxidase 2	F:peroxidase activity; P:metabolic process; F:binding; C:intracellular; P:cellular process; P:response to stimulus	EC:1.11.1.7	IPR002016 (PFAM); G3DSA:1.10.420.10 (GENE3D); G3DSA:1.10.520.10 (GENE3D); PTHR30555 (PANTHER); PTHR30555:SF0 (PANTHER); IPR010255 (SUPERFAMILY)	NA	NA	235.321	4.66667	20.298	5.66667	19.6667	13.3427
DR_008024-RA	GH3	beta-glucosidase D [Phialocephala scopiformis]	P:glucan catabolic process; P:cellular macromolecule metabolic process; F:beta-glucosidase activity; C:plasma membrane; F:isomerase activity	EC:3.2.1.21	IPR002772 (G3DSA:3.40.50.GENE3D); IPR001764 (G3DSA:3.20.20.GENE3D); IPR002772 (PFAM); PTHR30620:SF57 (PANTHER); IPR026892 (PANTHER); IPR026892 (PANTHER); PTHR30620:SF57 (PANTHER); IPR002772 (SUPERFAMILY); IPR017853 (SUPERFAMILY)	NA	NA	NA	NA	NA	NA	11.3333	8.16824
DR_008038-RA	GT90	glycosyltransferase family 90	C:integral component of membrane; F:transferase activity	0	PTHR12203 (PANTHER); PTHR12203:SF22 (PANTHER)	NA	NA	NA	NA	NA	NA	10.6667	8.19499
DR_008042-RA	PL1	Pectin lyase [Glarea lozoyensis ATCC 20868]	P:pectin catabolic process; F:pectate lyase activity; C:extracellular region; F:binding	EC:4.2.2.2	IPR002022 (SMART); IPR002022 (PFAM); IPR012334 (G3DSA:2.160.20.GENE3D); PTHR31683 (PANTHER); PTHR31683:SF6 (PANTHER); IPR011050 (SUPERFAMILY)	67.1896	0.666667	369.389	8.66667	1718.31	338	610.333	544.459
DR_008050-RA	PL1	pectin lyase E [Pestalotiopsis fici W106-1]	P:pectin catabolic process; C:extracellular region; F:pectin lyase activity	EC:4.2.2.10	IPR002022 (PFAM); IPR012334 (G3DSA:2.160.20.GENE3D); PTHR31683 (PANTHER); PTHR31683:SF10 (PANTHER); PTHR31683:SF10 (PANTHER); PTHR31683 (PANTHER); IPR011050 (SUPERFAMILY)	NA	NA	NA	NA	NA	NA	NA	NA
DR_008069-RA	AA9	Glycosyl hydrolase family 61 [Marssonina brunnea multigermtubi MB_m1]	P:glucan catabolic process; P:oxidation-reduction process; F:monooxygenase activity; F:cellulase activity	EC:3.2.1.4	IPR005103 (PFAM); PTHR33353 (PANTHER); PTHR33353:SF10 (PANTHER)	NA	NA	NA	NA	NA	NA	NA	NA
DR_008072-RA	GT33	glycosyl transferase group 1 [Marssonina brunnea multigermtubi MB_m1]	F:transferase activity, transferring glycosyl groups; C:integral component of membrane	0	PF13692 (PFAM); IPR026051 (PANTHER); PTHR13036:SF0 (PANTHER); SSF53756 (SUPERFAMILY)	NA	NA	61.7517	0.666667	11.8973	3.33333	8.33333	6.98027
DR_008106-RA	GH76	glycoside hydrolase family 76	F:mannan endo-1,6-alpha-mannosidase activity; P:carbohydrate catabolic process	EC:3.2.1.101	IPR012341 (G3DSA:1.50.10.GENE3D); IPR005198 (PFAM); IPR014480 (PIRSF); PTHR12145 (PANTHER); PTHR12145:SF19 (PANTHER); IPR008928 (SUPERFAMILY)	NA	NA	NA	NA	2.37945	0.666667	3	3.55741
DR_008112-RA	CE5	cutinase [Marssonina brunnea multigermtubi MB_m1]	F:triglyceride lipase activity; P:triglyceride catabolic process; C:extracellular region; F:cutinase activity	EC:3.1.1.74; EC:3.1.1.3	no IPS match	NA	NA	NA	NA	NA	NA	NA	NA
DR_008120-RA	GH47	glycoside hydrolase family 47	P:endoplasmic reticulum unfolded protein response; P:glycoprotein ERAD pathway; F:calcium ion binding; P:N-glycan processing; C:integral component of membrane; F:mannosyl-oligosaccharide 1,2-alpha-mannosidase activity; C:endoplasmic reticulum; P:ER-associated ubiquitin-dependent protein catabolic process	EC:3.2.1.113	IPR001382 (PRINTS); IPR001382 (PFAM); IPR001382 (G3DSA:1.50.10.GENE3D); PTHR11742 (PANTHER); PTHR11742 (PANTHER); PTHR11742:SF25 (PANTHER); PTHR11742 (PANTHER); PTHR11742:SF25 (PANTHER); PTHR11742:SF25 (PANTHER); IPR001382 (SUPERFAMILY)	112.436	1	NA	NA	44.9	10	53.6667	29.0783
DR_008131-RA	GH5	glycoside hydrolase family 5	P:glucan catabolic process; P:fungal-type cell wall organization; F:glucan exo-1,3-beta-glucosidase activity; C:fungal-type cell wall; F:metal ion binding; P:cellular glucan metabolic process; C:extracellular region; C:cell surface	EC:3.2.1.58	no IPS match	NA	NA	NA	NA	NA	NA	NA	NA
DR_008131-RA	GH5	glycoside hydrolase family 5	P:glucan catabolic process; P:fungal-type cell wall organization; F:glucan exo-1,3-beta-glucosidase activity; C:fungal-type cell wall; F:metal ion binding; P:cellular glucan metabolic process; C:extracellular region; C:cell surface	EC:3.2.1.58	no IPS match	NA	NA	NA	NA	NA	NA	NA	NA
DR_008136-RA	AA3	GMC oxidoreductase	F:oxidoreductase activity	0	IPR012132 (PIRSF); IPR000172 (PFAM); IPR007867 (PFAM); IPR023753 (G3DSA:3.50.50.GENE3D); PTHR11552 (PANTHER); PTHR11552:SF138 (PANTHER); SSF54373 (SUPERFAMILY); IPR023753 (SUPERFAMILY)	67.1896	0.666667	NA	NA	19.1326	5.33333	3.33333	2.566
DR_008142-RA	GH76	glycosyl hydrolase [Marssonina brunnea multigermtubi MB_m1]	F:hydrolase activity	0	IPR012341 (G3DSA:1.50.10.GENE3D); IPR005198 (PFAM); PTHR12145 (PANTHER); PTHR12145:SF24 (PANTHER); PTHR12145:SF24 (PANTHER); PTHR12145 (PANTHER); PTHR12145:SF24 (PANTHER); PTHR12145 (PANTHER); IPR008928 (SUPERFAMILY)	NA	NA	NA	NA	4.80738	1.33333	17.3333	16.1068
DR_008149-RA	GT32	glycosyltransferase family 32	P:N-glycan processing; P:mannosylation; C:membrane; C:integral component of membrane; F:alpha-1,6-mannosyltransferase activity; F:transferase activity; C:alpha-1,6-mannosyltransferase complex	0	PTHR31834 (PANTHER); PTHR31834 (PANTHER); PTHR31834:SF9 (PANTHER); PTHR31834:SF9 (PANTHER)	NA	NA	117.68	2.33333	47.3576	8	20.6667	19.3251
DR_008209-RA	GH18	chitinase [Marssonina brunnea multigermtubi MB_m1]	F:chitinase activity; P:carbohydrate metabolic process; F:chitin binding; P:chitin catabolic process; C:extracellular region	EC:3.2.1.14	IPR011583 (SMART); IPR001223 (PFAM); IPR013781 (G3DSA:3.20.20.GENE3D); IPR029070 (G3DSA:3.10.50.GENE3D); PTHR11177 (PANTHER); IPR029070 (SUPERFAMILY); IPR017853 (SUPERFAMILY)	143.45	1	111.818	3.33333	66.7513	16	18	12.6742
DR_008213-RA	GH64	glucanase B	F:hydrolase activity	0	IPR032477 (PFAM); PTHR38165 (PANTHER); PTHR38165:SF1 (PANTHER); PTHR38165 (PANTHER); PTHR38165:SF1 (PANTHER)	NA	NA	NA	NA	NA	NA	NA	NA
DR_008223-RA	AA7	hypothetical protein V494_01307	F:oxidoreductase activity, acting on CH-OH group of donors; F:flavin adenine dinucleotide binding; F:catalytic activity; F:oxidoreductase activity; P:oxidation-reduction process	0	IPR016167 (G3DSA:3.30.43.GENE3D); PTHR11748:SF88 (PANTHER); PTHR11748 (PANTHER); IPR016166 (SUPERFAMILY)	NA	NA	NA	NA	31.77	3.66667	37	32.7887
DR_008235-RA	GT32	snoRNA binding	C:integral component of membrane; F:transferase activity	0	IPR007577 (PFAM); PTHR12042 (PANTHER); IPR029044 (SUPERFAMILY)	NA	NA	NA	NA	NA	NA	19.6667	13.9674
DR_008237-RA	GH28	Glycoside family 28 [Penicillium expansum]	P:polysaccharide catabolic process; F:hydrolase activity, acting on glycosyl bonds	0	IPR012334 (G3DSA:2.160.20.GENE3D); IPR000743 (PFAM); PTHR31736 (PANTHER); PTHR31736:SF7 (PANTHER); IPR011050 (SUPERFAMILY)	NA	NA	22.3635	0.666667	22.3679	3.66667	20.3333	15.9739
DR_008246-RA	CE10	carboxylesterase [Phialocephala scopiformis]	C:membrane; C:integral component of membrane; F:N-acetyltransferase activity; F:hydrolase activity	0	IPR029058 (G3DSA:3.40.50.GENE3D); IPR002018 (PFAM); PTHR11559 (PANTHER); PTHR11559:SF236 (PANTHER); PTHR11559 (PANTHER); PTHR11559:SF236 (PANTHER); IPR029058 (SUPERFAMILY)	NA	NA	NA	NA	16.5404	2	23.3333	18.9718
DR_008301-RA	GH76	mannan endo-1,6-alpha-mannosidase [Phialocephala scopiformis]	C:integral component of membrane; F:hydrolase activity	0	IPR012341 (G3DSA:1.50.10.GENE3D); IPR005198 (PFAM); PTHR12145:SF23 (PANTHER); PTHR12145 (PANTHER); IPR008928 (SUPERFAMILY)	NA	NA	NA	NA	NA	NA	3.66667	3.06105
DR_008307-RA	CE10	lipase 2	F:hydrolase activity	0	IPR029058 (G3DSA:3.40.50.GENE3D); PTHR11559:SF206 (PANTHER); PTHR11559 (PANTHER); IPR029058 (SUPERFAMILY)	NA	NA	NA	NA	NA	NA	7	6.27754
DR_008317-RA	GT62	mannan polymerase II complex ANP1 subunit	P:mannosylation; F:alpha-1,6-mannosyltransferase activity; P:protein N-linked glycosylation; C:endoplasmic reticulum; C:alpha-1,6-mannosyltransferase complex	EC:2.4.1	PF03452 (PFAM); PTHR24319:SF24 (PANTHER); PTHR24319 (PANTHER)	NA	NA	NA	NA	NA	NA	57.6667	46.1881
DR_008399-RA	AA7	D-arabinono-1,4-lactone oxidase	C:integral component of mitochondrial outer membrane; F:D-arabinono-1,4-lactone oxidase activity; P:dehydro-D-arabinono-1,4-lactone biosynthetic process; F:flavin adenine dinucleotide binding; P:cellular response to oxidative stress; P:oxidation-reduction process	EC:1.1.3.37	IPR016167 (G3DSA:3.30.43.GENE3D); IPR006094 (PFAM); IPR007173 (PFAM); IPR030654 (TIGRFAM); IPR016169 (G3DSA:3.30.465.GENE3D); PTHR13878:SF63 (PANTHER); PTHR13878 (PANTHER); IPR016166 (PROSITE_PROFILES); IPR016166 (SUPERFAMILY)	143.45	1	NA	NA	2.37945	0.666667	4	2.92432
DR_008402-RA	GH128	[Fibroporia radiculosa]	P:biological_process; P:carbohydrate metabolic process; C:cellular_component; F:molecular_function; F:hydrolase activity	0	IPR024655 (PFAM)	111.075	1.33333	NA	NA	NA	NA	NA	NA
DR_008419-RA	AA9	glycosyl hydrolase family 61	P:oxidation-reduction process; F:monooxygenase activity; F:hydrolase activity	0	PR01217 (PRINTS); IPR005103 (PFAM); PTHR33353:SF10 (PANTHER); PTHR33353 (PANTHER)	NA	NA	207.096	5	48.62	8.33333	110.333	103.546
DR_008420-RA	CE10	lipase 4 [Marssonina brunnea multigermtubi MB_m1]	F:hydrolase activity	0	IPR002018 (PFAM); IPR029058 (G3DSA:3.40.50.GENE3D); PTHR11559 (PANTHER); PTHR11559:SF162 (PANTHER); IPR029058 (SUPERFAMILY)	NA	NA	NA	NA	NA	NA	7.33333	5.06918
DR_008436-RA	GT1	glycosyltransferase family 28 domain-containing [Marssonina brunnea multigermtubi MB_m1]	P:carbohydrate metabolic process; P:flavonoid glucuronidation; C:intracellular membrane-bounded organelle; C:membrane; P:protein transport; F:sterol 3-beta-glucosyltransferase activity; P:flavonoid biosynthetic process; P:sterol biosynthetic process; P:lipid glycosylation	EC:2.4.1.173	IPR004182 (SMART); IPR004182 (PFAM); IPR004276 (PFAM); G3DSA:3.40.50.2000 (GENE3D); G3DSA:3.40.50.2000 (GENE3D); IPR002213 (PANTHER); PTHR11926:SF417 (PANTHER); IPR002213 (PANTHER); PTHR11926:SF417 (PANTHER); SSF53756 (SUPERFAMILY)	NA	NA	72.9146	1	6.02134	1.66667	45	23.3368
DR_008440-RA	GT25	glycosyltransferase family 25	C:membrane	0	PTHR10730 (PANTHER)	NA	NA	NA	NA	NA	NA	NA	NA
DR_008486-RA	GH93	BNR Asp-box repeat domain containing [Marssonina brunnea multigermtubi MB_m1]	C:membrane; C:integral component of membrane; F:hydrolase activity	0	IPR023296 (G3DSA:2.115.10.GENE3D); PTHR38792:SF3 (PANTHER); PTHR38792 (PANTHER); SSF110296 (SUPERFAMILY)	NA	NA	NA	NA	NA	NA	2.33333	1.61887
DR_008488-RA	CBM50	carbohydrate-binding module family 50 [Cercospora fijiensis CIRAD86]	C:small-subunit processome; F:hydrolase activity	0	IPR018392 (SMART); IPR018392 (PFAM); G3DSA:1.10.530.10 (GENE3D); IPR018392 (G3DSA:3.10.350.GENE3D); IPR018392 (G3DSA:3.10.350.GENE3D); IPR018392 (SUPERFAMILY); IPR018392 (SUPERFAMILY); IPR023346 (SUPERFAMILY)	NA	NA	NA	NA	25.9613	4.66667	11.3333	11.2379
DR_008488-RA	CBM50	carbohydrate-binding module family 50 [Cercospora fijiensis CIRAD86]	C:small-subunit processome; F:hydrolase activity	0	IPR018392 (SMART); IPR018392 (PFAM); G3DSA:1.10.530.10 (GENE3D); IPR018392 (G3DSA:3.10.350.GENE3D); IPR018392 (G3DSA:3.10.350.GENE3D); IPR018392 (SUPERFAMILY); IPR018392 (SUPERFAMILY); IPR023346 (SUPERFAMILY)	NA	NA	NA	NA	25.9613	4.66667	11.3333	11.2379
DR_008525-RA	AA3	gmc oxidoreductase	F:oxidoreductase activity, acting on CH-OH group of donors; F:flavin adenine dinucleotide binding; F:oxidoreductase activity; P:oxidation-reduction process	0	IPR023753 (G3DSA:3.50.50.GENE3D); G3DSA:3.30.560.10 (GENE3D); IPR007867 (PFAM); PTHR11552 (PANTHER); PTHR11552:SF124 (PANTHER); IPR023753 (SUPERFAMILY); SSF54373 (SUPERFAMILY)	NA	NA	NA	NA	NA	NA	NA	NA
DR_008528-RA	GT15	glycolipid 2-alpha-mannosyltransferase [Marssonina brunnea multigermtubi MB_m1]	P:cell wall mannoprotein biosynthetic process; P:protein O-linked glycosylation; P:mannosylation; C:integral component of membrane; P:protein N-linked glycosylation; C:Golgi apparatus; F:alpha-1,2-mannosyltransferase activity	EC:2.4.1	IPR029044 (G3DSA:3.90.550.GENE3D); IPR002685 (PFAM); IPR002685 (PANTHER); PTHR31121:SF6 (PANTHER); IPR029044 (SUPERFAMILY)	NA	NA	NA	NA	7.18683	2	72	63.2025
DR_008545-RA	GH20	cytochrome 52A4 [Phialocephala scopiformis]	P:carbohydrate metabolic process; F:beta-N-acetylhexosaminidase activity	EC:3.2.1.52	IPR025705 (PRINTS); IPR015883 (PFAM); IPR029018 (G3DSA:3.30.379.GENE3D); IPR013781 (G3DSA:3.20.20.GENE3D); IPR029019 (PFAM); IPR013781 (G3DSA:3.20.20.GENE3D); PTHR22600 (PANTHER); PTHR22600:SF0 (PANTHER); IPR017853 (SUPERFAMILY); IPR029018 (SUPERFAMILY); IPR017853 (SUPERFAMILY)	NA	NA	NA	NA	NA	NA	NA	NA
DR_008545-RA	GH20	cytochrome 52A4 [Phialocephala scopiformis]	P:carbohydrate metabolic process; F:beta-N-acetylhexosaminidase activity	EC:3.2.1.52	IPR025705 (PRINTS); IPR015883 (PFAM); IPR029018 (G3DSA:3.30.379.GENE3D); IPR013781 (G3DSA:3.20.20.GENE3D); IPR029019 (PFAM); IPR013781 (G3DSA:3.20.20.GENE3D); PTHR22600 (PANTHER); PTHR22600:SF0 (PANTHER); IPR017853 (SUPERFAMILY); IPR029018 (SUPERFAMILY); IPR017853 (SUPERFAMILY)	NA	NA	NA	NA	NA	NA	NA	NA
DR_008556-RA	CE10	acetyl-hydrolase [Marssonina brunnea multigermtubi MB_m1]	P:metabolic process; F:hydrolase activity	0	IPR013094 (PFAM); IPR029058 (G3DSA:3.40.50.GENE3D); PTHR23024:SF203 (PANTHER); PTHR23024 (PANTHER); IPR029058 (SUPERFAMILY)	NA	NA	NA	NA	NA	NA	NA	NA
DR_008593-RA	AA5	kelch domain-containing	P:mycelium development; C:cellular_component; F:molecular_function	0	IPR006652 (SMART); IPR015916 (G3DSA:2.130.10.GENE3D); PF13964 (PFAM); IPR003609 (PFAM); PTHR32208:SF31 (PANTHER); PTHR32208 (PANTHER); IPR003609 (PROSITE_PROFILES); IPR011043 (SUPERFAMILY)	NA	NA	NA	NA	NA	NA	NA	NA
DR_008600-RA	GH3	glycoside hydrolase family 3	F:beta-glucosidase activity; P:cellulose catabolic process; C:plasma membrane; F:scopolin beta-glucosidase activity	EC:3.2.1.21	IPR002772 (PFAM); IPR002772 (G3DSA:3.40.50.GENE3D); IPR001764 (G3DSA:3.20.20.GENE3D); PTHR30620:SF52 (PANTHER); PTHR30620:SF52 (PANTHER); IPR026892 (PANTHER); IPR026892 (PANTHER); IPR002772 (SUPERFAMILY); IPR017853 (SUPERFAMILY)	111.075	1.33333	414.002	10	287.139	46.3333	120.333	82.3458
DR_008619-RA	GH5	glycoside hydrolase family 5 [Phialocephala scopiformis]	P:carbohydrate metabolic process; C:extracellular region; F:hydrolase activity, hydrolyzing O-glycosyl compounds; F:cellulose binding	0	IPR013781 (G3DSA:3.20.20.GENE3D); IPR001547 (PFAM); PTHR31451:SF11 (PANTHER); PTHR31451 (PANTHER); IPR017853 (SUPERFAMILY)	NA	NA	NA	NA	19.9884	3	22.6667	19.456
DR_008619-RA	CBM1	glycoside hydrolase family 5 [Phialocephala scopiformis]	P:carbohydrate metabolic process; C:extracellular region; F:hydrolase activity, hydrolyzing O-glycosyl compounds; F:cellulose binding	0	IPR013781 (G3DSA:3.20.20.GENE3D); IPR001547 (PFAM); PTHR31451:SF11 (PANTHER); PTHR31451 (PANTHER); IPR017853 (SUPERFAMILY)	NA	NA	NA	NA	19.9884	3	22.6667	19.456
DR_008694-RA	GH63	glycoside hydrolase family 63 [Marssonina brunnea multigermtubi MB_m1]	C:endoplasmic reticulum membrane; P:protein N-linked glycosylation; F:mannosyl-oligosaccharide glucosidase activity; P:oligosaccharide metabolic process	EC:3.2.1.106	IPR031335 (PFAM); PTHR10412:SF10 (PANTHER); IPR004888 (PANTHER); IPR008928 (SUPERFAMILY)	NA	NA	NA	NA	NA	NA	28	15.3178
DR_008737-RA	GH47	class I alpha-mannosidase [Marssonina brunnea multigermtubi MB_m1]	F:structural constituent of ribosome; F:calcium ion binding; C:integral component of membrane; F:mannosyl-oligosaccharide 1,2-alpha-mannosidase activity; C:ribosome; P:translation	EC:3.2.1.113	IPR001382 (PRINTS); IPR001382 (G3DSA:1.50.10.GENE3D); IPR001382 (PFAM); PTHR11742:SF49 (PANTHER); PTHR11742 (PANTHER); IPR001382 (SUPERFAMILY)	NA	NA	NA	NA	NA	NA	6	6.05223
DR_008760-RA	GH51	alpha-n-arabinofuranosidase c	P:L-arabinose metabolic process; P:polysaccharide catabolic process; F:alpha-L-arabinofuranosidase activity	EC:3.2.1.55	IPR010720 (SMART); IPR010720 (PFAM); IPR013781 (G3DSA:3.20.20.GENE3D); PTHR31776 (PANTHER); PTHR31776:SF4 (PANTHER); PTHR31776 (PANTHER); PTHR31776:SF4 (PANTHER); SSF51011 (SUPERFAMILY); IPR017853 (SUPERFAMILY)	NA	NA	NA	NA	14.0641	1.33333	3.66667	2.93586
DR_008766-RA	GH16	glycoside hydrolase family 16	P:carbohydrate metabolic process; C:integral component of membrane; F:hydrolase activity, hydrolyzing O-glycosyl compounds	0	IPR013320 (G3DSA:2.60.120.GENE3D); IPR005629 (PFAM); PTHR31361 (PANTHER); PTHR31361:SF12 (PANTHER); IPR000757 (PROSITE_PROFILES); IPR013320 (SUPERFAMILY)	NA	NA	NA	NA	NA	NA	5.66667	4.72125
DR_008770-RA	GT34	galactosyl transferase GMA12 MNN10 family [Marssonina brunnea multigermtubi MB_m1]	P:cell wall mannoprotein biosynthetic process; P:mannosylation; F:alpha-1,6-mannosyltransferase activity; P:protein N-linked glycosylation; C:endoplasmic reticulum; C:alpha-1,6-mannosyltransferase complex	EC:2.4.1	IPR008630 (PFAM); PTHR31306 (PANTHER); PTHR31306:SF4 (PANTHER)	NA	NA	44.765	1.33333	65.295	15.6667	23.3333	26.921
DR_008825-RA	GH43	glycoside family 43 [Marssonina brunnea multigermtubi MB_m1]	P:carbohydrate metabolic process; F:hydrolase activity, hydrolyzing O-glycosyl compounds	0	IPR023296 (G3DSA:2.115.10.GENE3D); PTHR22925:SF41 (PANTHER); IPR006710 (PANTHER); IPR023296 (SUPERFAMILY)	NA	NA	NA	NA	NA	NA	NA	NA
DR_008846-RA	AA7	FAD-binding domain-containing [Alternaria alternata]	F:catalytic activity	0	IPR006094 (PFAM); IPR016169 (G3DSA:3.30.465.GENE3D); PTHR13878 (PANTHER); IPR016166 (PROSITE_PROFILES); IPR016166 (SUPERFAMILY)	NA	NA	NA	NA	NA	NA	4	3.37434
DR_008871-RA	GT59	glycosyltransferase family 59	C:membrane	0	IPR016900 (PFAM); IPR016900 (PANTHER)	NA	NA	NA	NA	8.25537	2.33333	8.66667	4.03939
DR_008906-RA	AA7	24-dehydrocholesterol reductase precursor [Marssonina brunnea multigermtubi MB_m1]	F:oxidoreductase activity, acting on CH-OH group of donors; F:flavin adenine dinucleotide binding; P:steroid metabolic process; P:oxidation-reduction process; F:delta24(24-1) sterol reductase activity	EC:1.3.1.71	IPR006094 (PFAM); IPR016169 (G3DSA:3.30.465.GENE3D); PTHR10801:SF3 (PANTHER); PTHR10801 (PANTHER); IPR016166 (PROSITE_PROFILES); IPR016166 (SUPERFAMILY)	NA	NA	NA	NA	8.40079	2.33333	34.6667	26.3773
DR_008917-RA	CE4	chitin deacetylase	F:catalytic activity	0	IPR002509 (PFAM); IPR002509 (G3DSA:3.20.20.GENE3D); PTHR10587 (PANTHER); PTHR10587:SF92 (PANTHER); IPR002509 (PROSITE_PROFILES); IPR011330 (SUPERFAMILY)	NA	NA	NA	NA	NA	NA	3	2.98256
DR_008919-RA	GH27	alpha-galactosidase alpha-n-acetylgalactosaminidase [Marssonina brunnea multigermtubi MB_m1]	P:carbohydrate metabolic process; F:raffinose alpha-galactosidase activity	EC:3.2.1.22	IPR013780 (G3DSA:2.60.40.GENE3D); IPR013780 (G3DSA:2.60.40.GENE3D); PTHR11452:SF38 (PANTHER); PTHR11452 (PANTHER); SSF51011 (SUPERFAMILY)	NA	NA	NA	NA	24.7286	1.66667	10.6667	7.00127
DR_008926-RA	GT32	glycosyltransferase family 32 [Phialocephala scopiformis]	F:mannosyltransferase activity; P:mannosylation; C:integral component of membrane; C:Golgi membrane; P:mannosyl-inositol phosphorylceramide biosynthetic process	EC:2.4.1	PTHR32385:SF2 (PANTHER); PTHR32385 (PANTHER)	NA	NA	NA	NA	12.9955	1	8.66667	10.2508
DR_008943-RA	GH31	alpha-xylosidase [Marssonina brunnea multigermtubi MB_m1]	P:carbohydrate metabolic process; F:hydrolase activity, hydrolyzing O-glycosyl compounds	0	IPR000322 (PFAM); PTHR22762 (PANTHER); PTHR22762:SF89 (PANTHER); IPR017853 (SUPERFAMILY); SSF51011 (SUPERFAMILY)	NA	NA	NA	NA	23.746	6.66667	28.6667	19.2876
DR_008973-RA	GT8	nucleotide-diphospho-sugar transferase [Phialocephala scopiformis]	F:acetylglucosaminyltransferase activity; C:membrane; P:protein N-linked glycosylation; C:Golgi apparatus	EC:2.4.1	IPR029044 (G3DSA:3.90.550.GENE3D); IPR030518 (PTHR11183:PANTHER); PTHR11183 (PANTHER); IPR029044 (SUPERFAMILY)	NA	NA	NA	NA	NA	NA	NA	NA
DR_008975-RA	AA7	FAD-binding domain-containing [Phialocephala scopiformis]	F:oxidoreductase activity, acting on CH-OH group of donors; F:flavin adenine dinucleotide binding; P:oxidation-reduction process	0	IPR012951 (PFAM); PTHR11748:SF99 (PANTHER); PTHR11748 (PANTHER)	NA	NA	NA	NA	NA	NA	NA	NA
DR_009011-RA	GT15	alpha-1,2-mannosyltransferase [Marssonina brunnea multigermtubi MB_m1]	F:pyridoxal phosphate binding; F:mannosyltransferase activity; P:mannosylation; C:integral component of membrane; P:protein glycosylation	EC:2.4.1	IPR002685 (PFAM); IPR029044 (G3DSA:3.90.550.GENE3D); PTHR31121:SF7 (PANTHER); IPR002685 (PANTHER); IPR029044 (SUPERFAMILY)	NA	NA	NA	NA	NA	NA	8.66667	10.4539
DR_009044-RA	GH1	(Trans)glycosidase [Glarea lozoyensis ATCC 20868]	F:hydrolase activity, hydrolyzing O-glycosyl compounds; P:primary metabolic process; P:organic substance metabolic process	0	IPR001360 (PFAM); IPR013781 (G3DSA:3.20.20.GENE3D); PTHR10353:SF53 (PANTHER); IPR001360 (PANTHER); IPR017853 (SUPERFAMILY)	NA	NA	139.967	3	92.1794	20.6667	142.667	100.943
DR_009051-RA	CE10	alpha beta-hydrolase [Phialocephala scopiformis]	F:hydrolase activity	0	IPR029058 (G3DSA:3.40.50.GENE3D); PTHR11559:SF249 (PANTHER); PTHR11559 (PANTHER); PTHR11559:SF249 (PANTHER); PTHR11559 (PANTHER); IPR029058 (SUPERFAMILY)	NA	NA	1404.27	36	954.805	207.667	308	213.47
DR_009089-RA	CE3	lipolytic enzyme [Marssonina brunnea multigermtubi MB_m1]	F:hydrolase activity	0	IPR013830 (PFAM); IPR013830 (G3DSA:3.40.50.GENE3D); PTHR30383 (PANTHER); PTHR30383:SF9 (PANTHER); IPR013830 (SUPERFAMILY)	NA	NA	470.157	11.6667	198.281	29.3333	70	71.776
DR_009092-RA	CE16	GDSL-like Lipase Acylhydrolase [Marssonina brunnea multigermtubi MB_m1]	F:hydrolase activity	0	no IPS match	NA	NA	NA	NA	NA	NA	10	11.5017
DR_009099-RA	GH20	beta-hexosaminidase precursor [Marssonina brunnea multigermtubi MB_m1]	P:carbohydrate metabolic process; F:beta-N-acetylhexosaminidase activity	EC:3.2.1.52	IPR025705 (PRINTS); IPR029018 (G3DSA:3.30.379.GENE3D); IPR029019 (PFAM); IPR013781 (G3DSA:3.20.20.GENE3D); IPR015883 (PFAM); IPR025705 (PIRSF); PTHR22600 (PANTHER); PTHR22600:SF19 (PANTHER); PTHR22600:SF19 (PANTHER); PTHR22600 (PANTHER); IPR029018 (SUPERFAMILY); IPR017853 (SUPERFAMILY)	NA	NA	61.7138	0.666667	20.2496	5.66667	55	46.2116
DR_009173-RA	CE10	carboxylesterase family [Marssonina brunnea multigermtubi MB_m1]	F:hydrolase activity	0	IPR002018 (PFAM); IPR029058 (G3DSA:3.40.50.GENE3D); PTHR11559:SF160 (PANTHER); PTHR11559 (PANTHER); IPR029058 (SUPERFAMILY)	134.379	1.33333	NA	NA	NA	NA	5.33333	4.53427
DR_009196-RA	CE4	chitin deacetylase	F:hydrolase activity, acting on carbon-nitrogen (but not peptide) bonds; P:carbohydrate metabolic process	0	IPR002509 (PFAM); IPR002509 (G3DSA:3.20.20.GENE3D); PTHR10587:SF88 (PANTHER); PTHR10587 (PANTHER); IPR002509 (PROSITE_PROFILES); IPR011330 (SUPERFAMILY)	NA	NA	NA	NA	NA	NA	NA	NA
DR_009220-RA	AA2	peroxidase catalase 2 [Marssonina brunnea multigermtubi MB_m1]	P:response to oxidative stress; C:cytoplasm; F:metal ion binding; F:catalase activity; P:cellular oxidant detoxification; P:oxidation-reduction process; F:heme binding; P:hydrogen peroxide catabolic process	EC:1.11.1.6	IPR002016 (PRINTS); IPR000763 (PRINTS); G3DSA:1.10.420.10 (GENE3D); G3DSA:1.10.420.10 (GENE3D); G3DSA:1.10.520.10 (GENE3D); IPR002016 (PFAM); IPR000763 (TIGRFAM); G3DSA:1.10.520.10 (GENE3D); PTHR30555:SF0 (PANTHER); PTHR30555 (PANTHER); PTHR30555 (PANTHER); IPR002016 (PROSITE_PROFILES); IPR010255 (SUPERFAMILY); IPR010255 (SUPERFAMILY)	NA	NA	252.422	4	87.2375	14	133.333	91.6502
DR_009220-RA	AA2	peroxidase catalase 2 [Marssonina brunnea multigermtubi MB_m1]	P:response to oxidative stress; C:cytoplasm; F:metal ion binding; F:catalase activity; P:cellular oxidant detoxification; P:oxidation-reduction process; F:heme binding; P:hydrogen peroxide catabolic process	EC:1.11.1.6	IPR002016 (PRINTS); IPR000763 (PRINTS); G3DSA:1.10.420.10 (GENE3D); G3DSA:1.10.420.10 (GENE3D); G3DSA:1.10.520.10 (GENE3D); IPR002016 (PFAM); IPR000763 (TIGRFAM); G3DSA:1.10.520.10 (GENE3D); PTHR30555:SF0 (PANTHER); PTHR30555 (PANTHER); PTHR30555 (PANTHER); IPR002016 (PROSITE_PROFILES); IPR010255 (SUPERFAMILY); IPR010255 (SUPERFAMILY)	NA	NA	252.422	4	87.2375	14	133.333	91.6502
DR_009221-RA	PL4	Rhamnogalacturonate lyase	F:catalytic activity	0	IPR008979 (G3DSA:2.60.120.GENE3D); IPR029411 (PFAM); IPR008979 (SUPERFAMILY)	NA	NA	NA	NA	72.2019	12.3333	17	12.6646
DR_009234-RA	GH31	glycoside hydrolase family 31	P:carbohydrate metabolic process; F:hydrolase activity, hydrolyzing O-glycosyl compounds; F:carbohydrate binding	0	IPR000322 (PFAM); IPR013785 (G3DSA:3.20.20.GENE3D); PTHR22762:SF38 (PANTHER); PTHR22762 (PANTHER); SSF117125 (SUPERFAMILY); SSF51011 (SUPERFAMILY); IPR017853 (SUPERFAMILY)	NA	NA	NA	NA	NA	NA	8	5.76872
DR_009254-RA	GH16	glycoside hydrolase family 16 [Phialocephala scopiformis]	P:carbohydrate metabolic process; C:membrane; F:hydrolase activity, hydrolyzing O-glycosyl compounds	0	PTHR10963:SF34 (PANTHER); PTHR10963 (PANTHER); IPR013320 (SUPERFAMILY)	NA	NA	NA	NA	NA	NA	2.33333	1.14082
DR_009286-RA	CE10	alpha beta-hydrolase [Phialocephala scopiformis]	C:membrane	0	IPR013094 (PFAM); IPR029058 (G3DSA:3.40.50.GENE3D); PTHR23024:SF210 (PANTHER); PTHR23024 (PANTHER); IPR029058 (SUPERFAMILY)	NA	NA	NA	NA	3.54494	1	12	21.8824
DR_009295-RA	GH76	glycosyl hydrolase	F:hydrolase activity	0	IPR012341 (G3DSA:1.50.10.GENE3D); IPR005198 (PFAM); PTHR12145:SF14 (PANTHER); PTHR12145 (PANTHER); IPR008928 (SUPERFAMILY)	NA	NA	NA	NA	NA	NA	NA	NA
DR_009347-RA	GH63	glycoside hydrolase family 63 [Marssonina brunnea multigermtubi MB_m1]	C:endoplasmic reticulum membrane; P:protein N-linked glycosylation; F:mannosyl-oligosaccharide glucosidase activity; P:oligosaccharide metabolic process	EC:3.2.1.106	IPR031335 (PFAM); PTHR10412:SF10 (PANTHER); IPR004888 (PANTHER); IPR008928 (SUPERFAMILY)	NA	NA	NA	NA	NA	NA	33	17.8007
DR_009390-RA	GH47	glycoside hydrolase family 47	P:vesicle-mediated transport; F:calcium ion binding; P:N-glycan processing; F:mannosyl-oligosaccharide 1,2-alpha-mannosidase activity; C:clathrin adaptor complex; C:Golgi membrane; C:endoplasmic reticulum; P:intracellular protein transport; P:ER-associated ubiquitin-dependent protein catabolic process	EC:3.2.1.113	IPR001382 (PRINTS); IPR001382 (G3DSA:1.50.10.GENE3D); IPR001382 (PFAM); PTHR11742 (PANTHER); PTHR11742:SF45 (PANTHER); IPR001382 (SUPERFAMILY)	NA	NA	89.3784	2.66667	160.134	42.3333	50	39.8741
DR_009424-RA	PL1	pectin lyase	P:carbohydrate metabolic process; F:binding; F:hydrolase activity	0	IPR012334 (G3DSA:2.160.20.GENE3D); PTHR31683:SF10 (PANTHER); PTHR31683:SF10 (PANTHER); PTHR31683 (PANTHER); PTHR31683:SF10 (PANTHER); PTHR31683 (PANTHER); IPR011050 (SUPERFAMILY)	NA	NA	NA	NA	40.4507	11.3333	71	78.6031
DR_009426-RA	GH51	glycoside hydrolase family 51	P:L-arabinose metabolic process; F:alpha-L-arabinofuranosidase activity	EC:3.2.1.55	IPR010720 (SMART); IPR010720 (PFAM); PTHR31776:SF0 (PANTHER); PTHR31776 (PANTHER); IPR017853 (SUPERFAMILY)	NA	NA	NA	NA	NA	NA	NA	NA
DR_009503-RA	GT8	glucose N-acetyltransferase [Marssonina brunnea multigermtubi MB_m1]	F:acetylglucosaminyltransferase activity; C:integral component of membrane; P:protein N-linked glycosylation; C:Golgi apparatus	EC:2.4.1	IPR029044 (G3DSA:3.90.550.GENE3D); IPR030518 (PTHR11183:PANTHER); PTHR11183 (PANTHER); IPR029044 (SUPERFAMILY)	NA	NA	72.8767	1	21.1539	3.33333	19.3333	21.3239
DR_009514-RA	CE10	type B [Penicillium expansum]	F:hydrolase activity	0	IPR002018 (PFAM); IPR029058 (G3DSA:3.40.50.GENE3D); PTHR11559 (PANTHER); PTHR11559:SF201 (PANTHER); IPR029058 (SUPERFAMILY)	NA	NA	NA	NA	NA	NA	NA	NA
DR_009528-RA	AA7	FAD binding domain containing [Marssonina brunnea multigermtubi MB_m1]	F:oxidoreductase activity	0	IPR016169 (G3DSA:3.30.465.GENE3D); IPR006094 (PFAM); PTHR11748:SF91 (PANTHER); PTHR11748 (PANTHER); IPR016166 (PROSITE_PROFILES); IPR016166 (SUPERFAMILY)	NA	NA	NA	NA	NA	NA	NA	NA
DR_009545-RA	GT2	glycosyltransferase family 2	C:integral component of membrane; F:transferase activity	0	IPR001173 (PFAM); IPR029044 (G3DSA:3.90.550.GENE3D); PTHR35408:SF1 (PANTHER); PTHR35408 (PANTHER); IPR029044 (SUPERFAMILY)	NA	NA	NA	NA	NA	NA	NA	NA
DR_009546-RA	GH37	neutral trehalase	F:L-ascorbic acid binding; C:cytoplasm; F:iron ion binding; F:oxidoreductase activity, acting on paired donors, with incorporation or reduction of molecular oxygen; F:calcium ion binding; P:oxidation-reduction process; P:trehalose catabolic process; F:alpha,alpha-trehalase activity	EC:3.2.1.28	IPR001661 (PRINTS); IPR001661 (PFAM); PTHR23403:SF6 (PANTHER); PTHR23403:SF6 (PANTHER); IPR001661 (PANTHER); IPR001661 (PANTHER); PTHR23403:SF6 (PANTHER); IPR008928 (SUPERFAMILY)	NA	NA	NA	NA	15.375	1.66667	48.6667	24.512
DR_009585-RA	GT22	glycosyltransferase family 22	F:mannosyltransferase activity; C:integral component of membrane; P:protein N-linked glycosylation; C:endoplasmic reticulum	EC:2.4.1	IPR005599 (PFAM); IPR005599 (PANTHER); IPR005599 (PANTHER); IPR005599 (PANTHER); PTHR22760:SF1 (PANTHER); PTHR22760:SF1 (PANTHER)	NA	NA	44.765	1.33333	7.13835	2	21.3333	14.6146
DR_009606-RA	GT2	Chitin synthase 4	C:integral component of membrane; F:chitin synthase activity; P:cell wall organization; C:plasma membrane	EC:2.4.1.16	PF03142 (PFAM); IPR004835 (PANTHER); PTHR22914:SF10 (PANTHER); IPR029044 (SUPERFAMILY)	NA	NA	NA	NA	20.0369	3	45.6667	24.5707
DR_009619-RA	CE10	alpha beta-Hydrolase [Glarea lozoyensis ATCC 20868]	F:hydrolase activity	0	IPR015943 (G3DSA:2.130.10.GENE3D); IPR029058 (G3DSA:3.40.50.GENE3D); IPR001375 (PFAM); PTHR11731:SF149 (PANTHER); PTHR11731 (PANTHER); IPR029058 (SUPERFAMILY); SSF82171 (SUPERFAMILY)	NA	NA	NA	NA	NA	NA	12.3333	7.098
DR_009633-RA	CE3	carbohydrate esterase family 3	C:membrane; P:lipid metabolic process; C:integral component of membrane; F:phosphoric diester hydrolase activity; F:hydrolase activity	0	IPR013830 (PFAM); IPR013830 (G3DSA:3.40.50.GENE3D); PTHR30383 (PANTHER); PTHR30383:SF4 (PANTHER); IPR013830 (SUPERFAMILY)	NA	NA	55.9278	1.66667	132.313	21.3333	22.6667	19.2853
DR_009635-RA	GT8	glycosyltransferase family 8	F:transferase activity	0	IPR029044 (G3DSA:3.90.550.GENE3D); PTHR11183 (PANTHER); PTHR11183:SF42 (PANTHER); PTHR11183:SF42 (PANTHER); PTHR11183 (PANTHER); IPR029044 (SUPERFAMILY)	NA	NA	NA	NA	NA	NA	6	6.26641
DR_009643-RA	CE3	GDSL-like Lipase Acylhydrolase	P:biological_process; F:lysophospholipase activity; C:membrane; C:integral component of membrane; C:cellular_component; F:hydrolase activity	0	IPR013830 (G3DSA:3.40.50.GENE3D); IPR013830 (SUPERFAMILY)	NA	NA	NA	NA	12.8689	3.66667	5	6.69808
DR_009648-RA	PL1	pectin lyase a precursor [Neofusicoccum parvum UCRNP2]	P:carbohydrate metabolic process	0	IPR002022 (SMART); IPR012334 (G3DSA:2.160.20.GENE3D); IPR002022 (PFAM); PTHR31683:SF10 (PANTHER); PTHR31683 (PANTHER); IPR011050 (SUPERFAMILY)	154.961	2	682.926	15.6667	150.785	29.3333	34	28.6353
DR_009669-RA	CE1	S-formylglutathione hydrol	F:S-formylglutathione hydrolase activity; P:formaldehyde catabolic process; C:cytosol; F:carboxylic ester hydrolase activity	EC:3.1.2.12; EC:3.1.1.1	IPR000801 (PFAM); IPR029058 (G3DSA:3.40.50.GENE3D); IPR014186 (PANTHER); IPR029058 (SUPERFAMILY)	98.203	0.666667	NA	NA	15.2483	4.33333	24.6667	22.4736
DR_009689-RA	GT2	chitin synthase D	F:transferase activity, transferring hexosyl groups; C:integral component of membrane	0	PF03142 (PFAM); IPR029044 (G3DSA:3.90.550.GENE3D); PTHR22914:SF21 (PANTHER); IPR004835 (PANTHER); IPR029044 (SUPERFAMILY)	NA	NA	NA	NA	NA	NA	NA	NA
DR_009782-RA	GT4	glycosyl transferase group 1	F:transferase activity	0	G3DSA:3.40.50.2000 (GENE3D); IPR001296 (PFAM); PTHR12526:SF402 (PANTHER); PTHR12526 (PANTHER); SSF53756 (SUPERFAMILY)	NA	NA	NA	NA	NA	NA	5.33333	3.6653
DR_009783-RA	GT32	glycosyltransferase sugar-binding region containing DXD domain-containing [Marssonina brunnea multigermtubi MB_m1]	C:integral component of membrane; F:transferase activity	0	IPR007577 (PFAM); PTHR31834:SF8 (PANTHER); PTHR31834 (PANTHER); IPR029044 (SUPERFAMILY)	NA	NA	NA	NA	NA	NA	8.33333	6.11341
DR_009819-RA	AA6	benzoquinone reductase	F:FMN binding; P:negative regulation of transcription, DNA-templated; F:oxidoreductase activity; P:oxidation-reduction process	0	IPR029039 (G3DSA:3.40.50.GENE3D); IPR005025 (PFAM); PTHR30546 (PANTHER); IPR029039 (SUPERFAMILY)	NA	NA	NA	NA	16.5404	2	2.66667	5.24638
DR_009886-RA	GT4	glycosyltransferase family 4	P:chromatin organization; C:nucleus; P:transcription, DNA-templated; P:regulation of transcription, DNA-templated; F:transferase activity	0	G3DSA:3.40.50.2000 (GENE3D); IPR001296 (PFAM); SSF53756 (SUPERFAMILY)	NA	NA	NA	NA	NA	NA	3.33333	3.11661
DR_009894-RA	GT62	mannan polymerase II complex ANP1 subunit	C:integral component of membrane; P:vacuolar transport; F:transferase activity; C:intracellular	0	PF03452 (PFAM); PTHR24319:SF31 (PANTHER); PTHR24319 (PANTHER); IPR029044 (SUPERFAMILY)	NA	NA	72.9146	1	34.6045	7	23.6667	19.3327
DR_009927-RA	GH5	glycoside hydrolase family 5	P:glucan catabolic process; F:glucan exo-1,3-beta-glucosidase activity; C:fungal-type cell wall; C:barrier septum; P:fungal-type cell wall disassembly involved in conjugation with cellular fusion; F:glucan endo-1,6-beta-glucosidase activity; C:extracellular region; P:fungal-type cell wall beta-glucan metabolic process; C:cell surface; C:actin fusion focus	EC:3.2.1.75; EC:3.2.1.58	IPR001547 (PFAM); IPR013781 (G3DSA:3.20.20.GENE3D); PTHR31297 (PANTHER); PTHR31297:SF8 (PANTHER); IPR017853 (SUPERFAMILY)	179.626	1.66667	NA	NA	13.1112	3.66667	15.6667	16.6029
DR_009944-RA	GT1	glycosyltransferase family 1	P:carbohydrate metabolic process; P:flavonoid glucuronidation; C:intracellular membrane-bounded organelle; F:sterol 3-beta-glucosyltransferase activity; P:flavonoid biosynthetic process; P:lipid glycosylation	EC:2.4.1.173	IPR002213 (PFAM); G3DSA:3.40.50.2000 (GENE3D); IPR002213 (PANTHER); PTHR11926:SF238 (PANTHER); SSF53756 (SUPERFAMILY)	NA	NA	NA	NA	7.18683	2	20	10.0484
DR_009964-RA	GH17	cell wall glucanase	P:carbohydrate metabolic process; F:hydrolase activity, hydrolyzing O-glycosyl compounds	0	IPR013781 (G3DSA:3.20.20.GENE3D); PTHR16631:SF14 (PANTHER); PTHR16631 (PANTHER); IPR017853 (SUPERFAMILY)	NA	NA	NA	NA	NA	NA	48	53.914
DR_009966-RA	GT48	1,3-beta-glucan synthase component FKS1	F:1,3-beta-D-glucan synthase activity; F:pyridoxal phosphate binding; P:(1->3)-beta-D-glucan biosynthetic process; C:integral component of membrane; C:1,3-beta-D-glucan synthase complex	EC:2.4.1.34	IPR026899 (SMART); IPR003440 (PFAM); IPR026899 (PFAM); PTHR12741 (PANTHER); PTHR12741 (PANTHER); PTHR12741 (PANTHER); PTHR12741:SF7 (PANTHER); PTHR12741:SF7 (PANTHER)	585.31	5	520.557	12	216.99	50.3333	162	77.2958
DR_009967-RA	GH72	(Trans)glycosidase [Glarea lozoyensis ATCC 20868]	P:fungal-type cell wall organization; C:fungal-type cell wall; P:fungal-type cell wall (1->3)-beta-D-glucan biosynthetic process; C:anchored component of external side of plasma membrane; C:intracellular membrane-bounded organelle; C:cytoplasmic part; F:1,3-beta-glucanosyltransferase activity; F:hydrolase activity	0	IPR012946 (SMART); IPR004886 (PFAM); IPR012946 (PFAM); IPR013781 (G3DSA:3.20.20.GENE3D); PTHR31468 (PANTHER); PTHR31468:SF2 (PANTHER); IPR017853 (SUPERFAMILY)	NA	NA	NA	NA	NA	NA	NA	NA
DR_009967-RA	CBM43	(Trans)glycosidase [Glarea lozoyensis ATCC 20868]	P:fungal-type cell wall organization; C:fungal-type cell wall; P:fungal-type cell wall (1->3)-beta-D-glucan biosynthetic process; C:anchored component of external side of plasma membrane; C:intracellular membrane-bounded organelle; C:cytoplasmic part; F:1,3-beta-glucanosyltransferase activity; F:hydrolase activity	0	IPR012946 (SMART); IPR004886 (PFAM); IPR012946 (PFAM); IPR013781 (G3DSA:3.20.20.GENE3D); PTHR31468 (PANTHER); PTHR31468:SF2 (PANTHER); IPR017853 (SUPERFAMILY)	NA	NA	NA	NA	NA	NA	NA	NA
DR_009995-RA	GH18	glycoside hydrolase family 18	F:chitinase activity; P:carbohydrate metabolic process; F:chitin binding; P:chitin catabolic process; C:integral component of membrane; C:extracellular region	EC:3.2.1.14	IPR011583 (SMART); IPR013781 (G3DSA:3.20.20.GENE3D); IPR001223 (PFAM); IPR029070 (G3DSA:3.10.50.GENE3D); PTHR11177 (PANTHER); PTHR11177:SF222 (PANTHER); IPR029070 (SUPERFAMILY); IPR017853 (SUPERFAMILY)	NA	NA	NA	NA	14.2767	4	17	16.8495
DR_009996-RA	GH47	glycoside hydrolase family 47	C:membrane; P:metabolic process; F:hydrolase activity	0	IPR001382 (PRINTS); IPR001382 (G3DSA:1.50.10.GENE3D); IPR001382 (PFAM); PTHR11742:SF49 (PANTHER); PTHR11742 (PANTHER); PTHR11742 (PANTHER); IPR001382 (SUPERFAMILY)	NA	NA	NA	NA	NA	NA	48.3333	30.7026
DR_010019-RA	GH93	BNR Asp-box repeat domain containing [Marssonina brunnea multigermtubi MB_m1]	C:membrane	0	IPR011040 (G3DSA:2.120.10.GENE3D); PTHR38792:SF3 (PANTHER); PTHR38792 (PANTHER); IPR023296 (SUPERFAMILY)	NA	NA	NA	NA	NA	NA	4.33333	5.00254
DR_010020-RA	GH43	Glycoside hydrolase family 43	P:metabolic process; F:hydrolase activity, hydrolyzing O-glycosyl compounds	0	IPR006710 (PFAM); IPR023296 (G3DSA:2.115.10.GENE3D); PTHR22925:SF12 (PANTHER); IPR006710 (PANTHER); IPR023296 (SUPERFAMILY)	NA	NA	72.9146	1	4.7589	1.33333	16.6667	21.7531
DR_010040-RA	GH132	SUN domain-containing [Marssonina brunnea multigermtubi MB_m1]	0	0	IPR005556 (PFAM); PTHR31316 (PANTHER)	NA	NA	NA	NA	NA	NA	114	90.1034
DR_010066-RA	GH28	Pectin lyase [Glarea lozoyensis ATCC 20868]	F:catalytic activity	0	IPR012334 (G3DSA:2.160.20.GENE3D); PTHR31736:SF6 (PANTHER); PTHR31736 (PANTHER)	NA	NA	425.241	10.3333	1285.97	305.333	418.667	365.867
DR_010074-RA	GT22	GPI mannosyltransferase 3 [Fusarium oxysporum lycopersici 4287]	F:transferase activity, transferring glycosyl groups; C:membrane; P:single-organism metabolic process	0	IPR005599 (PFAM); IPR005599 (PANTHER); PTHR22760:SF4 (PANTHER); IPR005599 (PANTHER); PTHR22760:SF4 (PANTHER)	NA	NA	84.0395	1.33333	23.7273	4	17.3333	13.6054
DR_010106-RA	GH109	oxidoreductase family [Marssonina brunnea multigermtubi MB_m1]	F:oxidoreductase activity; C:membrane; P:oxidation-reduction process	0	IPR016040 (G3DSA:3.40.50.GENE3D); IPR000683 (PFAM); PTHR22604 (PANTHER); PTHR22604:SF111 (PANTHER); IPR016040 (SUPERFAMILY)	NA	NA	44.6892	1.33333	33.0997	6.66667	21.6667	22.2853
DR_010122-RA	GH51	glycoside hydrolase family 51	P:L-arabinose metabolic process; F:alpha-L-arabinofuranosidase activity	EC:3.2.1.55	IPR010720 (SMART); IPR010720 (PFAM); PTHR31776:SF0 (PANTHER); PTHR31776 (PANTHER); IPR017853 (SUPERFAMILY)	NA	NA	NA	NA	NA	NA	NA	NA
DR_010124-RA	PL1	pectin lyase	P:carbohydrate metabolic process; F:binding; F:hydrolase activity	0	IPR002022 (PFAM); IPR012334 (G3DSA:2.160.20.GENE3D); PTHR31683:SF10 (PANTHER); PTHR31683 (PANTHER); IPR011050 (SUPERFAMILY)	NA	NA	NA	NA	103.068	18.3333	45.3333	40.8213
DR_010159-RA	GH47	glycoside hydrolase family 47	F:calcium ion binding; C:membrane; F:mannosyl-oligosaccharide 1,2-alpha-mannosidase activity; C:cytoplasmic vesicle; P:primary metabolic process; P:organic substance metabolic process	EC:3.2.1.113	IPR001382 (PRINTS); IPR001382 (G3DSA:1.50.10.GENE3D); IPR001382 (PFAM); PTHR11742 (PANTHER); PTHR11742:SF45 (PANTHER); IPR001382 (SUPERFAMILY)	NA	NA	117.604	2.33333	89.0895	22.3333	70.3333	57.3202
DR_010182-RA	GT8	glycosyl transferase family	F:transferase activity, transferring glycosyl groups	0	IPR029044 (G3DSA:3.90.550.GENE3D); PTHR11183:SF3 (PANTHER); PTHR11183 (PANTHER); IPR029044 (SUPERFAMILY)	178.265	2	268.848	5.66667	122.17	26.3333	27.3333	22.7413
DR_010250-RA	GT28	glycosyltransferase family 28 domain-containing [Marssonina brunnea multigermtubi MB_m1]	F:transferase activity, transferring hexosyl groups	0	G3DSA:3.40.50.2000 (GENE3D)	NA	NA	55.852	1.66667	133.198	16.3333	23.3333	28.0141
DR_010275-RA	GH47	glycoside hydrolase family 47	C:membrane; F:hydrolase activity, acting on glycosyl bonds	0	IPR001382 (PRINTS); IPR001382 (PFAM); IPR001382 (G3DSA:1.50.10.GENE3D); PTHR11742 (PANTHER); PTHR11742:SF49 (PANTHER); IPR001382 (SUPERFAMILY)	NA	NA	NA	NA	NA	NA	43	27.9946
DR_010276-RA	GH18	glycoside hydrolase family 18	F:chitinase activity; P:carbohydrate metabolic process; F:chitin binding; P:chitin catabolic process; C:membrane; C:extracellular region	EC:3.2.1.14	IPR011583 (SMART); IPR013781 (G3DSA:3.20.20.GENE3D); IPR029070 (G3DSA:3.10.50.GENE3D); IPR001223 (PFAM); PTHR11177 (PANTHER); PTHR11177:SF222 (PANTHER); IPR017853 (SUPERFAMILY); IPR029070 (SUPERFAMILY)	NA	NA	NA	NA	35.673	7.33333	24.3333	24.7751
DR_010305-RA	GH72	(Trans)glycosidase [Glarea lozoyensis ATCC 20868]	C:primary cell septum; C:anchored component of external side of plasma membrane; F:1,3-beta-glucanosyltransferase activity; P:chromatin silencing; C:cellular bud scar; P:fungal-type cell wall organization; P:filamentous growth; P:fungal-type cell wall (1->3)-beta-D-glucan biosynthetic process; C:mitochondrion; C:membrane raft; C:integral component of membrane; C:ER to Golgi transport vesicle; C:n…	0	IPR013781 (G3DSA:3.20.20.GENE3D); IPR004886 (PFAM); PTHR31468:SF2 (PANTHER); PTHR31468 (PANTHER); IPR017853 (SUPERFAMILY)	NA	NA	NA	NA	NA	NA	6	5.35781
DR_010305-RA	CBM43	(Trans)glycosidase [Glarea lozoyensis ATCC 20868]	C:primary cell septum; C:anchored component of external side of plasma membrane; F:1,3-beta-glucanosyltransferase activity; P:chromatin silencing; C:cellular bud scar; P:fungal-type cell wall organization; P:filamentous growth; P:fungal-type cell wall (1->3)-beta-D-glucan biosynthetic process; C:mitochondrion; C:membrane raft; C:integral component of membrane; C:ER to Golgi transport vesicle; C:n…	0	IPR013781 (G3DSA:3.20.20.GENE3D); IPR004886 (PFAM); PTHR31468:SF2 (PANTHER); PTHR31468 (PANTHER); IPR017853 (SUPERFAMILY)	NA	NA	NA	NA	NA	NA	6	5.35781
DR_010307-RA	GT48	glycosyltransferase family 48	F:1,3-beta-D-glucan synthase activity; F:pyridoxal phosphate binding; P:(1->3)-beta-D-glucan biosynthetic process; C:integral component of membrane; C:1,3-beta-D-glucan synthase complex	EC:2.4.1.34	IPR026899 (SMART); IPR026899 (PFAM); IPR003440 (PFAM); PTHR12741:SF7 (PANTHER); PTHR12741:SF7 (PANTHER); PTHR12741 (PANTHER); PTHR12741 (PANTHER); PTHR12741:SF7 (PANTHER)	581.403	6	514.619	13	271.973	60.6667	123	59.0501
DR_010309-RA	GH17	cell wall glucanase	P:carbohydrate metabolic process; F:hydrolase activity, hydrolyzing O-glycosyl compounds	0	IPR013781 (G3DSA:3.20.20.GENE3D); PTHR16631:SF14 (PANTHER); PTHR16631 (PANTHER); IPR017853 (SUPERFAMILY)	NA	NA	NA	NA	NA	NA	87.3333	81.117
DR_010314-RA	CE1	alpha beta-Hydrolase [Glarea lozoyensis ATCC 20868]	F:catalytic activity	0	IPR029058 (G3DSA:3.40.50.GENE3D); PTHR10992:SF890 (PANTHER); PTHR10992 (PANTHER); PTHR10992:SF890 (PANTHER); IPR029058 (SUPERFAMILY)	NA	NA	NA	NA	4.80738	1.33333	2.33333	1.74999
DR_010336-RA	GH16	glycoside hydrolase family 16	P:carbohydrate metabolic process; F:hydrolase activity, hydrolyzing O-glycosyl compounds	0	IPR013320 (G3DSA:2.60.120.GENE3D); IPR000757 (PFAM); PTHR10963:SF30 (PANTHER); PTHR10963 (PANTHER); IPR000757 (PROSITE_PROFILES); IPR013320 (SUPERFAMILY)	NA	NA	NA	NA	16.5404	2	19.6667	24.508
DR_010349-RA	AA3	GMC oxidoreductase	F:oxidoreductase activity, acting on CH-OH group of donors; F:flavin adenine dinucleotide binding; P:oxidation-reduction process	0	IPR023753 (G3DSA:3.50.50.GENE3D); IPR000172 (PFAM); PTHR11552 (PANTHER); PTHR11552:SF101 (PANTHER); IPR023753 (SUPERFAMILY)	NA	NA	NA	NA	NA	NA	NA	NA
DR_010374-RA	GH65	glycoside hydrolase family 65	F:catalytic activity	0	IPR012341 (G3DSA:1.50.10.GENE3D); IPR005196 (G3DSA:2.70.98.GENE3D); IPR005196 (PFAM); IPR005195 (PFAM); PTHR11051:SF8 (PANTHER); PTHR11051 (PANTHER); IPR011013 (SUPERFAMILY); IPR008928 (SUPERFAMILY)	NA	NA	NA	NA	NA	NA	11.6667	7.79346
DR_010379-RA	GH78	alpha-L-rhamnosidase [Marssonina brunnea multigermtubi MB_m1]	P:metabolic process; F:hydrolase activity, acting on glycosyl bonds	0	IPR008902 (PFAM); PTHR34987 (PANTHER); PTHR34987:SF1 (PANTHER); IPR008928 (SUPERFAMILY)	NA	NA	NA	NA	NA	NA	19.6667	13.0621
DR_010429-RA	GH5	glucan 1,3-beta-glucosidase [Marssonina brunnea multigermtubi MB_m1]	C:nucleus; C:mitochondrial intermembrane space; P:fungal-type cell wall disassembly involved in conjugation with cellular fusion; C:cytosol; F:glucan endo-1,6-beta-glucosidase activity; P:fungal-type cell wall beta-glucan metabolic process; C:actin fusion focus	EC:3.2.1.75	IPR013781 (G3DSA:3.20.20.GENE3D); PTHR31297 (PANTHER); PTHR31297:SF14 (PANTHER); IPR017853 (SUPERFAMILY)	NA	NA	NA	NA	NA	NA	4	3.6597
DR_010445-RA	GH114	endo alpha-1,4 polygalactosaminidase [Phialocephala scopiformis]	C:integral component of membrane; F:hydrolase activity	0	IPR004352 (PFAM); PTHR35273 (PANTHER); PTHR35273:SF1 (PANTHER); IPR017853 (SUPERFAMILY)	709.258	7	588.731	9.33333	70.7456	12	17.6667	15.9793
DR_010451-RA	GT2	Dolichol-phosphate mannosyltransferase	C:endoplasmic reticulum membrane; P:GPI anchor biosynthetic process; F:dolichyl-phosphate beta-D-mannosyltransferase activity; P:protein N-linked glycosylation; P:dolichol metabolic process; P:protein O-linked mannosylation; F:dolichyl-phosphate-mannose-protein mannosyltransferase activity	EC:2.4.1.109; EC:2.4.1.83	IPR001173 (PFAM); IPR029044 (G3DSA:3.90.550.GENE3D); PTHR10859 (PANTHER); IPR029044 (SUPERFAMILY)	NA	NA	100.655	3	51.9414	12	20.3333	28.4724
DR_010472-RA	CE10	hormone-sensitive lipase	P:metabolic process; C:membrane part; F:hydrolase activity	0	IPR029058 (G3DSA:3.40.50.GENE3D); IPR013094 (PFAM); PTHR23025 (PANTHER); PTHR23025:SF3 (PANTHER); IPR029058 (SUPERFAMILY)	166.754	1	NA	NA	10.7802	3	20	14.4779
DR_010481-RA	GH5	glucan 1,3-beta-glucosidase [Marssonina brunnea multigermtubi MB_m1]	P:carbohydrate metabolic process; C:intracellular membrane-bounded organelle; P:cellular component organization or biogenesis; C:cytoplasmic part; P:single-organism cellular process; P:fungal-type cell wall organization or biogenesis; F:hydrolase activity, hydrolyzing O-glycosyl compounds; C:intracellular organelle part	0	IPR013781 (G3DSA:3.20.20.GENE3D); PTHR31297:SF14 (PANTHER); PTHR31297 (PANTHER); IPR017853 (SUPERFAMILY)	NA	NA	NA	NA	NA	NA	2	1.54918
DR_010497-RA	GH114	endo alpha-1,4 polygalactosaminidase [Phialocephala scopiformis]	C:integral component of membrane; F:hydrolase activity	0	IPR004352 (PFAM); PTHR35273:SF1 (PANTHER); PTHR35273 (PANTHER); IPR017853 (SUPERFAMILY)	742.712	8.33333	576.712	13.6667	81.1974	9.66667	18.6667	16.475
DR_010503-RA	GT2	mannose phospho-dolichol synthase	C:endoplasmic reticulum membrane; P:GPI anchor biosynthetic process; F:dolichyl-phosphate beta-D-mannosyltransferase activity; P:protein N-linked glycosylation; P:dolichol metabolic process; P:protein O-linked mannosylation; F:dolichyl-phosphate-mannose-protein mannosyltransferase activity	EC:2.4.1.109; EC:2.4.1.83	IPR029044 (G3DSA:3.90.550.GENE3D); IPR001173 (PFAM); PTHR10859 (PANTHER); IPR029044 (SUPERFAMILY)	301.133	2.33333	241.069	3.66667	97.3745	22	30.3333	44.5752
DR_010618-RA	GT28	glycosyltransferase family 28 domain-containing [Marssonina brunnea multigermtubi MB_m1]	F:transferase activity, transferring hexosyl groups	0	G3DSA:3.40.50.2000 (GENE3D)	120.146	1	106.479	2	102.564	15.6667	30.6667	36.0798
DR_010672-RA	GH5	endo-beta-1,4-glucanase precursor [Marssonina brunnea multigermtubi MB_m1]	P:carbohydrate metabolic process; F:hydrolase activity, hydrolyzing O-glycosyl compounds	0	IPR001547 (PFAM); IPR013781 (G3DSA:3.20.20.GENE3D); PTHR34142:SF1 (PANTHER); PTHR34142 (PANTHER); IPR017853 (SUPERFAMILY)	NA	NA	NA	NA	NA	NA	NA	NA
DR_010721-RA	GH10	glycoside hydrolase family 10 [Marssonina brunnea multigermtubi MB_m1]	P:polysaccharide catabolic process; F:hydrolase activity, hydrolyzing O-glycosyl compounds	0	IPR001000 (PRINTS); IPR001000 (SMART); IPR001000 (PFAM); IPR013781 (G3DSA:3.20.20.GENE3D); PTHR31490 (PANTHER); IPR001000 (PROSITE_PROFILES); IPR017853 (SUPERFAMILY)	NA	NA	NA	NA	NA	NA	50	47.964
DR_010729-RA	AA11	RNA polymerase Rpb1 repeat domain-containing [Purpureocillium lilacinum]	F:chitin binding; F:carbohydrate binding	0	IPR001002 (SMART); IPR001002 (G3DSA:3.30.60.GENE3D); PTHR36182:SF1 (PANTHER); PTHR36182 (PANTHER); IPR001002 (PROSITE_PROFILES); IPR001002 (SUPERFAMILY)	NA	NA	NA	NA	NA	NA	NA	NA
DR_010729-RA	CBM18	RNA polymerase Rpb1 repeat domain-containing [Purpureocillium lilacinum]	F:chitin binding; F:carbohydrate binding	0	IPR001002 (SMART); IPR001002 (G3DSA:3.30.60.GENE3D); PTHR36182:SF1 (PANTHER); PTHR36182 (PANTHER); IPR001002 (PROSITE_PROFILES); IPR001002 (SUPERFAMILY)	NA	NA	NA	NA	NA	NA	NA	NA
DR_010737-RA	GH5	cellulase [Marssonina brunnea multigermtubi MB_m1]	P:metabolic process; F:hydrolase activity	0	IPR013781 (G3DSA:3.20.20.GENE3D); PTHR31451 (PANTHER); PTHR31451:SF11 (PANTHER); IPR017853 (SUPERFAMILY)	NA	NA	NA	NA	NA	NA	11.3333	14.9888
DR_010776-RA	GT2	chitin synthase	C:myosin complex; F:DNA binding; F:ATP binding; F:transferase activity, transferring hexosyl groups; C:integral component of membrane; F:motor activity	0	IPR001199 (G3DSA:3.10.120.GENE3D); PF03142 (PFAM); IPR001199 (PFAM); PTHR22914:SF13 (PANTHER); IPR004835 (PANTHER); IPR001199 (PROSITE_PROFILES); IPR001199 (SUPERFAMILY); IPR029044 (SUPERFAMILY); IPR027417 (SUPERFAMILY)	NA	NA	NA	NA	21.3478	3.33333	84	42.8376
DR_010777-RA	GT2	chitin synthase	C:myosin complex; F:DNA binding; F:ATP binding; F:transferase activity, transferring hexosyl groups; C:integral component of membrane; F:motor activity	0	IPR001609 (SMART); IPR001199 (SMART); IPR001199 (G3DSA:3.10.120.GENE3D); IPR014876 (PFAM); IPR009057 (G3DSA:1.10.10.GENE3D); IPR001609 (PFAM); IPR001199 (PFAM); PF03142 (PFAM); IPR001199 (G3DSA:3.10.120.GENE3D); IPR004835 (PANTHER); PTHR22914:SF18 (PANTHER); PTHR22914:SF18 (PANTHER); IPR004835 (PANTHER); IPR001609 (PROSITE_PROFILES); IPR001199 (PROSITE_PROFILES); IPR001199 (SUPERFAMILY); IPR02904…	NA	NA	33.5643	1	49.92	14	106	50.1439
DR_010789-RA	GT58	glycosyltransferase family 58	F:transferase activity, transferring hexosyl groups; C:integral component of membrane; C:endoplasmic reticulum	0	IPR007873 (PFAM); PTHR12646:SF0 (PANTHER); IPR007873 (PANTHER)	NA	NA	61.7138	0.666667	47.048	5.33333	6	5.94098
DR_010798-RA	GH13	alpha amylase [Marssonina brunnea multigermtubi MB_m1]	P:carbohydrate metabolic process; F:calcium ion binding; F:hydrolase activity, hydrolyzing O-glycosyl compounds	0	IPR013781 (G3DSA:3.20.20.GENE3D); PTHR10357:SF168 (PANTHER); IPR015902 (PANTHER); IPR017853 (SUPERFAMILY)	NA	NA	NA	NA	NA	NA	5.33333	3.78418
DR_010799-RA	AA7	FAD-binding [Glarea lozoyensis ATCC 20868]	F:oxidoreductase activity, acting on CH-OH group of donors; F:flavin adenine dinucleotide binding; P:oxidation-reduction process	0	IPR012951 (PFAM); IPR016169 (G3DSA:3.30.465.GENE3D); IPR006094 (PFAM); PTHR11748:SF64 (PANTHER); PTHR11748 (PANTHER); IPR016166 (PROSITE_PROFILES); IPR016166 (SUPERFAMILY)	1154.92	12	487.629	8.66667	137.739	28	46.6667	30.1959
DR_010802-RA	CE16	lysophospholipase a	F:hydrolase activity, acting on ester bonds	0	IPR013830 (G3DSA:3.40.50.GENE3D)	NA	NA	NA	NA	NA	NA	NA	NA
DR_010810-RA	GT59	glycosyltransferase family 59	C:membrane	0	IPR016900 (PFAM); IPR016900 (PANTHER)	NA	NA	NA	NA	24.9412	4.33333	13.6667	11.4764
DR_010889-RA	AA9	glycosyl hydrolase family 61 [Marssonina brunnea multigermtubi MB_m1]	F:hydrolase activity	0	IPR005103 (PFAM); PTHR33353:SF6 (PANTHER); PTHR33353 (PANTHER)	NA	NA	NA	NA	NA	NA	20.3333	23.3647
DR_010893-RA	GH15	glycosyl hydrolase	C:nucleus; F:DNA binding; P:DNA repair; F:zinc ion binding; C:cytosol; F:hydrolase activity, acting on glycosyl bonds	0	IPR011613 (PFAM); IPR012341 (G3DSA:1.50.10.GENE3D); PTHR31616:SF0 (PANTHER); PTHR31616 (PANTHER); IPR008928 (SUPERFAMILY)	NA	NA	NA	NA	NA	NA	9.33333	5.70369
DR_010905-RA	PL1	pectin lyase a precursor [Neofusicoccum parvum UCRNP2]	P:carbohydrate metabolic process	0	IPR002022 (SMART); IPR012334 (G3DSA:2.160.20.GENE3D); IPR002022 (PFAM); PTHR31683 (PANTHER); PTHR31683 (PANTHER); PTHR31683:SF10 (PANTHER); PTHR31683:SF10 (PANTHER); IPR011050 (SUPERFAMILY)	89.1325	1	706.001	14	371.266	73	72.3333	64.4275
DR_010909-RA	CE3	GDSL-like Lipase Acylhydrolase	C:membrane; C:integral component of membrane; F:hydrolase activity	0	IPR013830 (G3DSA:3.40.50.GENE3D); IPR013830 (SUPERFAMILY)	NA	NA	NA	NA	NA	NA	1	2.42756
DR_010916-RA	GH72	glycoside hydrolase family 72	P:fungal-type cell wall organization; C:fungal-type cell wall; P:fungal-type cell wall (1->3)-beta-D-glucan biosynthetic process; C:anchored component of external side of plasma membrane; F:1,3-beta-glucanosyltransferase activity; F:hydrolase activity, acting on glycosyl bonds	0	IPR004886 (PFAM); IPR013781 (G3DSA:3.20.20.GENE3D); PTHR31468:SF8 (PANTHER); PTHR31468 (PANTHER); PTHR31468:SF8 (PANTHER); PTHR31468 (PANTHER); IPR017853 (SUPERFAMILY)	NA	NA	NA	NA	NA	NA	3	3.45052
DR_010949-RA	GH109	NAD(P)-binding Rossmann-fold containing [Glarea lozoyensis ATCC 20868]	F:oxidoreductase activity; C:membrane; P:oxidation-reduction process	0	G3DSA:3.30.360.10 (GENE3D); PTHR22604 (PANTHER); PTHR22604:SF111 (PANTHER); SSF55347 (SUPERFAMILY)	NA	NA	NA	NA	32.0014	9	22.3333	22.2344
DR_010976-RA	GH78	alpha-L-rhamnosidase [Marssonina brunnea multigermtubi MB_m1]	P:metabolic process; F:hydrolase activity, acting on glycosyl bonds	0	IPR008902 (PFAM); PTHR34987 (PANTHER); PTHR34987:SF1 (PANTHER); IPR008928 (SUPERFAMILY)	NA	NA	NA	NA	NA	NA	6	4.43491
DR_010992-RA	CE10	lipase [Marssonina brunnea multigermtubi MB_m1]	P:metabolic process; F:hydrolase activity	0	IPR013094 (PFAM); IPR029058 (G3DSA:3.40.50.GENE3D); PTHR23024 (PANTHER); PTHR23024:SF156 (PANTHER); PTHR23024 (PANTHER); PTHR23024:SF156 (PANTHER); IPR029058 (SUPERFAMILY)	NA	NA	NA	NA	NA	NA	8	7.00578
DR_010993-RA	CE14	N-acetylglucosaminyl-phosphatidylinositol de-N-acetylase [Marssonina brunnea multigermtubi MB_m1]	C:membrane	0	IPR024078 (G3DSA:3.40.50.GENE3D); PTHR12993:SF11 (PANTHER); PTHR12993:SF11 (PANTHER); IPR003737 (PANTHER); IPR003737 (PANTHER); IPR024078 (SUPERFAMILY)	NA	NA	NA	NA	NA	NA	0.666667	0.575755
DR_011042-RA	GT22	GPI mannosyltransferase	F:transferase activity, transferring glycosyl groups; C:membrane; P:single-organism metabolic process	0	IPR005599 (PFAM); IPR005599 (PANTHER); PTHR22760:SF4 (PANTHER); IPR005599 (PANTHER); PTHR22760:SF4 (PANTHER)	NA	NA	55.852	1.66667	17.8701	5	9.33333	7.41687
DR_011050-RA	GH28	Pectin lyase [Glarea lozoyensis ATCC 20868]	F:catalytic activity	0	IPR000743 (PFAM); IPR012334 (G3DSA:2.160.20.GENE3D); PTHR31736 (PANTHER); PTHR31736:SF6 (PANTHER); IPR011050 (SUPERFAMILY)	134.379	1.33333	599.22	12	970.751	214.667	600.667	524.04
DR_011075-RA	GH71	glycoside hydrolase family 71	F:hydrolase activity	0	IPR005197 (PFAM); PTHR10566 (PANTHER); PTHR10566:SF89 (PANTHER)	NA	NA	NA	NA	NA	NA	NA	NA
DR_011126-RA	AA5	glyoxal oxidase	F:chitin binding	0	IPR013783 (G3DSA:2.60.40.GENE3D); IPR015202 (PFAM); IPR015916 (G3DSA:2.130.10.GENE3D); IPR009880 (PFAM); PTHR32208:SF21 (PANTHER); PTHR32208 (PANTHER); IPR014756 (SUPERFAMILY); IPR011043 (SUPERFAMILY)	NA	NA	NA	NA	NA	NA	8	5.50175
DR_011126-RA	CBM18	glyoxal oxidase	F:chitin binding	0	IPR013783 (G3DSA:2.60.40.GENE3D); IPR015202 (PFAM); IPR015916 (G3DSA:2.130.10.GENE3D); IPR009880 (PFAM); PTHR32208:SF21 (PANTHER); PTHR32208 (PANTHER); IPR014756 (SUPERFAMILY); IPR011043 (SUPERFAMILY)	NA	NA	NA	NA	NA	NA	8	5.50175
DR_011126-RA	CBM18	glyoxal oxidase	F:chitin binding	0	IPR013783 (G3DSA:2.60.40.GENE3D); IPR015202 (PFAM); IPR015916 (G3DSA:2.130.10.GENE3D); IPR009880 (PFAM); PTHR32208:SF21 (PANTHER); PTHR32208 (PANTHER); IPR014756 (SUPERFAMILY); IPR011043 (SUPERFAMILY)	NA	NA	NA	NA	NA	NA	8	5.50175
DR_011126-RA	CBM18	glyoxal oxidase	F:chitin binding	0	IPR013783 (G3DSA:2.60.40.GENE3D); IPR015202 (PFAM); IPR015916 (G3DSA:2.130.10.GENE3D); IPR009880 (PFAM); PTHR32208:SF21 (PANTHER); PTHR32208 (PANTHER); IPR014756 (SUPERFAMILY); IPR011043 (SUPERFAMILY)	NA	NA	NA	NA	NA	NA	8	5.50175
DR_011129-RA	AA7	fad binding domain-containing	F:catalytic activity	0	IPR012951 (PFAM); PTHR11748 (PANTHER); PTHR11748:SF77 (PANTHER)	339.856	2.33333	822.931	18.6667	972.093	164.333	191.667	142.976
DR_011171-RA	GH18	glycoside hydrolase family 18	P:metabolic process; F:hydrolase activity, acting on glycosyl bonds	0	IPR013781 (G3DSA:3.20.20.GENE3D); IPR001223 (PFAM); PTHR11177:SF157 (PANTHER); PTHR11177 (PANTHER); IPR017853 (SUPERFAMILY)	NA	NA	NA	NA	NA	NA	180.667	161.276
DR_011175-RA	GT31	glycosyltransferase family 31	C:membrane; F:transferase activity	0	PTHR23033 (PANTHER); PTHR23033:SF18 (PANTHER)	NA	NA	NA	NA	NA	NA	21.3333	22.5686
DR_011177-RA	AA7	Pc21g11020 [Penicillium rubens Wisconsin 54-1255]	F:oxidoreductase activity; P:metabolic process; F:binding	0	IPR006094 (PFAM); IPR016169 (G3DSA:3.30.465.GENE3D); PTHR11748:SF93 (PANTHER); PTHR11748 (PANTHER); PTHR11748:SF93 (PANTHER); PTHR11748 (PANTHER); IPR016166 (PROSITE_PROFILES); IPR016166 (SUPERFAMILY)	NA	NA	NA	NA	NA	NA	NA	NA
DR_011189-RA	GT8	glycosyltransferase family 8	F:transferase activity	0	IPR029044 (G3DSA:3.90.550.GENE3D); IPR002495 (PFAM); PTHR11183 (PANTHER); IPR029044 (SUPERFAMILY)	NA	NA	NA	NA	4.7589	1.33333	10	7.95414
DR_011205-RA	CBM20	GTP-binding [Verticillium dahliae ]	P:positive regulation of sexual sporulation resulting in formation of a cellular spore	0	IPR013783 (G3DSA:2.60.40.GENE3D); PTHR40625 (PANTHER); PTHR40625:SF2 (PANTHER); PTHR40625:SF2 (PANTHER); IPR014756 (SUPERFAMILY)	NA	NA	NA	NA	NA	NA	34.6667	36.9503
DR_011218-RA	GT4	trehalose synthase [Marssonina brunnea multigermtubi MB_m1]	F:transferase activity	0	G3DSA:3.40.50.2000 (GENE3D); IPR001296 (PFAM); PTHR12526 (PANTHER); PTHR12526:SF402 (PANTHER); SSF53756 (SUPERFAMILY)	NA	NA	NA	NA	NA	NA	NA	NA
DR_011219-RA	GT32	glycosyltransferase sugar-binding region containing DXD domain-containing [Marssonina brunnea multigermtubi MB_m1]	C:integral component of membrane; F:transferase activity	0	IPR007577 (PFAM); PTHR31834 (PANTHER); PTHR31834:SF8 (PANTHER); IPR029044 (SUPERFAMILY)	NA	NA	NA	NA	NA	NA	NA	NA
DR_011255-RA	GT1	isoleucyl-tRNA synthetase [Marssonina brunnea multigermtubi MB_m1]	P:isoleucyl-tRNA aminoacylation; F:ATP binding; P:carbohydrate metabolic process; F:isoleucine-tRNA ligase activity; F:transferase activity, transferring hexosyl groups; P:regulation of translational fidelity; F:aminoacyl-tRNA editing activity; C:cytosol; P:lipid glycosylation	EC:6.1.1.5	IPR002213 (PFAM); G3DSA:3.40.50.2000 (GENE3D); G3DSA:3.40.50.2000 (GENE3D); IPR004276 (PFAM); IPR002213 (PANTHER); PTHR11926:SF164 (PANTHER); SSF53756 (SUPERFAMILY)	NA	NA	NA	NA	NA	NA	3.33333	2.08154
DR_011264-RA	CE5	Cutinase [Pestalotiopsis fici W106-1]	F:hydrolase activity	0	IPR029058 (G3DSA:3.40.50.GENE3D)	NA	NA	61.7138	0.666667	NA	NA	6	8.46363
DR_011277-RA	CE1	epoxide hydrolase	F:hydrolase activity	0	IPR000639 (PRINTS); IPR000073 (PFAM); IPR029058 (G3DSA:3.40.50.GENE3D); PTHR10992 (PANTHER); PTHR10992:SF877 (PANTHER); PTHR10992 (PANTHER); PTHR10992:SF877 (PANTHER); IPR029058 (SUPERFAMILY)	NA	NA	NA	NA	56.7112	8	32.6667	36.0462
DR_011279-RA	GT69	glycosyltransferase family 69	C:membrane	0	IPR021047 (PFAM); PTHR34144:SF4 (PANTHER); PTHR34144 (PANTHER); PTHR34144 (PANTHER); PTHR34144:SF4 (PANTHER)	NA	NA	NA	NA	NA	NA	8.66667	7.20241
DR_011286-RA	CE10	lipase 2	C:cellular_component; F:molecular_function; F:hydrolase activity	0	IPR029058 (G3DSA:3.40.50.GENE3D); IPR002018 (PFAM); PTHR11559 (PANTHER); PTHR11559:SF206 (PANTHER); IPR029058 (SUPERFAMILY)	NA	NA	NA	NA	NA	NA	NA	NA
DR_011295-RA	GT62	mannan polymerase II complex ANP1 subunit	P:mannosylation; F:alpha-1,6-mannosyltransferase activity; P:protein N-linked glycosylation; C:endoplasmic reticulum; C:alpha-1,6-mannosyltransferase complex	EC:2.4.1	PF03452 (PFAM); PTHR24319:SF24 (PANTHER); PTHR24319 (PANTHER)	NA	NA	NA	NA	NA	NA	65	54.6164
DR_011317-RA	AA7	fad binding domain-containing	F:catalytic activity; P:metabolic process	0	PTHR11748 (PANTHER); PTHR11748:SF93 (PANTHER); IPR016166 (SUPERFAMILY)	NA	NA	NA	NA	NA	NA	2	1.05705
DR_011338-RA	GT2	Glycosyl family 2	C:membrane	0	IPR001173 (PFAM); PTHR35408:SF1 (PANTHER); PTHR35408 (PANTHER)	NA	NA	NA	NA	NA	NA	4	2.78352
DR_011356-RA	GH3	beta-glucosidase G	C:extracellular space; F:beta-glucosidase activity; P:cellulose catabolic process; F:scopolin beta-glucosidase activity	EC:3.2.1.21	IPR001764 (PRINTS); IPR001764 (G3DSA:3.20.20.GENE3D); IPR002772 (G3DSA:3.40.50.GENE3D); IPR002772 (PFAM); IPR001764 (PFAM); IPR026892 (PANTHER); PTHR30620:SF53 (PANTHER); IPR026892 (PANTHER); IPR002772 (SUPERFAMILY); IPR017853 (SUPERFAMILY)	NA	NA	NA	NA	NA	NA	9.66667	6.97711
DR_011365-RA	CE3	GDSL Lipase Acylhydrolase family	F:hydrolase activity	0	IPR001087 (PFAM); IPR013830 (G3DSA:3.40.50.GENE3D); PTHR14209 (PANTHER); IPR013830 (SUPERFAMILY)	NA	NA	117.604	2.33333	9.66322	2.66667	7.33333	11.5797
DR_011375-RA	GH16	glycoside hydrolase family 16	P:carbohydrate metabolic process; F:hydrolase activity, hydrolyzing O-glycosyl compounds	0	IPR000757 (PFAM); IPR013320 (G3DSA:2.60.120.GENE3D); PTHR10963:SF30 (PANTHER); PTHR10963 (PANTHER); IPR000757 (PROSITE_PROFILES); IPR013320 (SUPERFAMILY)	NA	NA	61.7138	0.666667	16.6374	2	11.3333	15.2002
DR_011392-RA	GH5	glycoside hydrolase family 5	P:metabolic process; F:hydrolase activity, acting on glycosyl bonds	0	IPR001547 (PFAM); IPR013781 (G3DSA:3.20.20.GENE3D); PTHR31297 (PANTHER); PTHR31297:SF13 (PANTHER); IPR017853 (SUPERFAMILY)	NA	NA	NA	NA	NA	NA	NA	NA
DR_011397-RA	GH43	arabinan endo-1,5-alpha-L-arabinosidase	P:carbohydrate metabolic process; F:hydrolase activity, hydrolyzing O-glycosyl compounds	0	IPR023296 (G3DSA:2.115.10.GENE3D); IPR006710 (PFAM); PTHR22925:SF36 (PANTHER); IPR006710 (PANTHER); IPR023296 (SUPERFAMILY)	NA	NA	NA	NA	NA	NA	6.33333	6.25256
DR_011418-RA	PL1	pectate lyase	P:polysaccharide catabolic process; F:pectate lyase activity; C:extracellular region	EC:4.2.2.2	IPR002022 (SMART); IPR002022 (PFAM); IPR012334 (G3DSA:2.160.20.GENE3D); PTHR31683:SF6 (PANTHER); PTHR31683 (PANTHER); IPR011050 (SUPERFAMILY)	NA	NA	NA	NA	NA	NA	NA	NA
DR_011419-RA	GH72	1,3-beta-glucanosyltransferase gel1	P:fungal-type cell wall organization; C:fungal-type cell wall; P:fungal-type cell wall (1->3)-beta-D-glucan biosynthetic process; C:anchored component of external side of plasma membrane; C:integral component of membrane; F:1,3-beta-glucanosyltransferase activity; F:hydrolase activity, acting on glycosyl bonds	0	IPR013781 (G3DSA:3.20.20.GENE3D); IPR004886 (PFAM); PTHR31468 (PANTHER); PTHR31468:SF5 (PANTHER); IPR017853 (SUPERFAMILY)	NA	NA	NA	NA	NA	NA	22	28.1922
DR_011430-RA	GH72	1,3-beta-glucanosyltransferase gel1 precursor [Marssonina brunnea multigermtubi MB_m1]	P:fungal-type cell wall organization; C:fungal-type cell wall; P:fungal-type cell wall (1->3)-beta-D-glucan biosynthetic process; C:anchored component of external side of plasma membrane; C:integral component of membrane; F:1,3-beta-glucanosyltransferase activity; F:hydrolase activity	0	IPR013781 (G3DSA:3.20.20.GENE3D); IPR004886 (PFAM); PTHR31468:SF5 (PANTHER); PTHR31468 (PANTHER); IPR017853 (SUPERFAMILY)	NA	NA	565.284	13.3333	426.118	85.3333	346	270.292
DR_011445-RA	GT2	chitin synthase 4 [Phialocephala scopiformis]	C:integral component of membrane; F:chitin synthase activity	EC:2.4.1.16	PF03142 (PFAM); PTHR22914:SF10 (PANTHER); PTHR22914:SF10 (PANTHER); IPR004835 (PANTHER); IPR004835 (PANTHER); IPR029044 (SUPERFAMILY)	NA	NA	33.5264	1	3.54494	1	34	19.3337
DR_011465-RA	AA3	gmc oxidoreductase	F:oxidoreductase activity, acting on CH-OH group of donors; F:flavin adenine dinucleotide binding; P:oxidation-reduction process	0	IPR007867 (PFAM); IPR023753 (G3DSA:3.50.50.GENE3D); IPR012132 (PIRSF); IPR000172 (PFAM); PTHR11552:SF138 (PANTHER); PTHR11552:SF138 (PANTHER); PTHR11552 (PANTHER); PTHR11552 (PANTHER); IPR023753 (SUPERFAMILY); SSF54373 (SUPERFAMILY)	NA	NA	NA	NA	14.1125	1.33333	6.66667	5.56205
DR_011484-RA	CE10	triacylglycerol lipase	C:integral component of membrane; F:hydrolase activity	0	IPR029058 (G3DSA:3.40.50.GENE3D); IPR002018 (PFAM); PTHR11559:SF240 (PANTHER); PTHR11559 (PANTHER); IPR029058 (SUPERFAMILY)	NA	NA	NA	NA	NA	NA	7.66667	5.52683
DR_011497-RA	GT8	glycosyltransferase family 8	F:ATP binding; F:transferase activity, transferring glycosyl groups; F:protein kinase activity; P:protein phosphorylation	0	IPR029044 (G3DSA:3.90.550.GENE3D); PTHR11183:SF3 (PANTHER); PTHR11183 (PANTHER); IPR029044 (SUPERFAMILY)	NA	NA	NA	NA	2.37945	0.666667	12.3333	16.2829
DR_011544-RA	AA4	glycolate oxidase	F:oxidoreductase activity, acting on CH-OH group of donors; F:flavin adenine dinucleotide binding; C:integral component of membrane; P:oxidation-reduction process	0	IPR006094 (PFAM); IPR004113 (PFAM); IPR016167 (G3DSA:3.30.43.GENE3D); IPR016169 (G3DSA:3.30.465.GENE3D); PTHR11748 (PANTHER); PTHR11748:SF81 (PANTHER); IPR016166 (PROSITE_PROFILES); IPR016166 (SUPERFAMILY); IPR016164 (SUPERFAMILY)	NA	NA	NA	NA	NA	NA	2.66667	2.32567
DR_011554-RA	GH72	glycoside hydrolase family 72	P:fungal-type cell wall organization; C:fungal-type cell wall; P:fungal-type cell wall (1->3)-beta-D-glucan biosynthetic process; C:anchored component of external side of plasma membrane; C:integral component of membrane; F:1,3-beta-glucanosyltransferase activity; F:hydrolase activity, acting on glycosyl bonds	0	IPR013781 (G3DSA:3.20.20.GENE3D); IPR004886 (PFAM); PTHR31468:SF8 (PANTHER); PTHR31468 (PANTHER); IPR017853 (SUPERFAMILY)	NA	NA	NA	NA	NA	NA	NA	NA
DR_011569-RA	GH31	glycoside hydrolase family 31	P:carbohydrate metabolic process; C:integral component of membrane; F:hydrolase activity, hydrolyzing O-glycosyl compounds; F:carbohydrate binding	0	IPR000322 (PFAM); PTHR22762 (PANTHER); PTHR22762:SF82 (PANTHER); PTHR22762:SF82 (PANTHER); PTHR22762 (PANTHER); SSF51011 (SUPERFAMILY); IPR017853 (SUPERFAMILY)	NA	NA	33.5264	1	9.42086	2.66667	28.3333	16.9144
DR_011572-RA	AA8	cellobiose dehydrogenase [Marssonina brunnea multigermtubi MB_m1]	F:oxidoreductase activity, acting on CH-OH group of donors; F:flavin adenine dinucleotide binding; P:oxidation-reduction process	0	IPR000172 (PFAM); IPR023753 (G3DSA:3.50.50.GENE3D); G3DSA:3.30.410.10 (GENE3D); IPR007867 (PFAM); PTHR11552:SF87 (PANTHER); PTHR11552 (PANTHER); SSF54373 (SUPERFAMILY); IPR023753 (SUPERFAMILY)	157.683	1.33333	44.765	1.33333	51.2121	11.6667	60	46.0743
DR_011664-RA	GH18	endochitinase [Marssonina brunnea multigermtubi MB_m1]	F:chitinase activity; P:carbohydrate metabolic process; F:chitin binding; P:chitin catabolic process; C:extracellular region	EC:3.2.1.14	IPR011583 (SMART); IPR013781 (G3DSA:3.20.20.GENE3D); IPR001223 (PFAM); PTHR11177 (PANTHER); PTHR11177:SF207 (PANTHER); IPR017853 (SUPERFAMILY)	NA	NA	84.1153	1.33333	21.5605	6	25.3333	25.7621
DR_011701-RA	GH16	glucan 1,3-beta-glucosidase [Purpureocillium lilacinum]	P:carbohydrate metabolic process; C:integral component of membrane; F:hydrolase activity, hydrolyzing O-glycosyl compounds; F:carbohydrate binding	0	IPR013320 (G3DSA:2.60.120.GENE3D); IPR000757 (PFAM); PTHR10963 (PANTHER); PTHR10963:SF28 (PANTHER); PTHR10963:SF28 (PANTHER); IPR000757 (PROSITE_PROFILES); IPR013320 (SUPERFAMILY)	NA	NA	NA	NA	NA	NA	2.66667	3.1074
DR_011702-RA	GH30	glycoside partial [Phialocephala scopiformis]	F:glucosylceramidase activity; P:carbohydrate metabolic process; P:metabolic process; P:sphingolipid metabolic process; F:hydrolase activity, acting on glycosyl bonds; F:hydrolase activity	0	IPR033453 (PFAM); IPR013781 (G3DSA:3.20.20.GENE3D); IPR001139 (PANTHER); IPR017853 (SUPERFAMILY)	NA	NA	NA	NA	12.947	1	33.3333	23.0767
DR_011703-RA	GT31	glycosyltransferase family 31	F:transferase activity, transferring glycosyl groups; C:membrane; C:integral component of membrane; F:transferase activity	0	IPR006740 (PFAM); PTHR10811 (PANTHER); PTHR10811:SF24 (PANTHER)	NA	NA	67.0528	2	4.71043	1.33333	26	20.6016
DR_011726-RA	PL1	pectate lyase A [Marssonina brunnea multigermtubi MB_m1]	P:carbohydrate metabolic process; F:fibrinogen binding	0	IPR002022 (SMART); IPR002022 (PFAM); IPR012334 (G3DSA:2.160.20.GENE3D); PTHR31683:SF6 (PANTHER); PTHR31683 (PANTHER); IPR011050 (SUPERFAMILY)	209.278	2	755.204	19	2860.35	527.667	728.333	656.698
DR_011736-RA	PL1	pectin lyase E [Pestalotiopsis fici W106-1]	P:polysaccharide catabolic process; F:lyase activity	0	IPR012334 (G3DSA:2.160.20.GENE3D); IPR002022 (PFAM); PTHR31683:SF10 (PANTHER); PTHR31683 (PANTHER); IPR011050 (SUPERFAMILY)	NA	NA	NA	NA	NA	NA	NA	NA
DR_011749-RA	GH54	fungal alpha-L- [Aspergillus flavus NRRL3357]	P:xylan catabolic process; P:L-arabinose metabolic process; F:alpha-L-arabinofuranosidase activity; P:arabinan catabolic process; C:extracellular region	EC:3.2.1.55	IPR015289 (PFAM); IPR013320 (G3DSA:2.60.120.GENE3D); PTHR39447:SF2 (PANTHER); PTHR39447 (PANTHER); IPR013320 (SUPERFAMILY)	NA	NA	NA	NA	15.3937	4.33333	23.6667	20.8907
DR_011749-RA	CBM42	fungal alpha-L- [Aspergillus flavus NRRL3357]	P:xylan catabolic process; P:L-arabinose metabolic process; F:alpha-L-arabinofuranosidase activity; P:arabinan catabolic process; C:extracellular region	EC:3.2.1.55	IPR015289 (PFAM); IPR013320 (G3DSA:2.60.120.GENE3D); PTHR39447:SF2 (PANTHER); PTHR39447 (PANTHER); IPR013320 (SUPERFAMILY)	NA	NA	NA	NA	15.3937	4.33333	23.6667	20.8907
DR_011765-RA	GH109	oxidoreductase [Phialocephala scopiformis]	P:transmembrane transport; F:oxidoreductase activity; C:membrane; C:integral component of membrane; P:oxidation-reduction process; P:transport	0	no IPS match	NA	NA	NA	NA	NA	NA	NA	NA
DR_011769-RA	AA2	WSC domain-containing	F:oxidoreductase activity; C:membrane; F:binding; P:response to stimulus	0	IPR002016 (PRINTS); IPR002207 (PRINTS); IPR002016 (PFAM); G3DSA:1.10.520.10 (GENE3D); PTHR31356:SF4 (PANTHER); PTHR31356 (PANTHER); IPR002016 (PROSITE_PROFILES); IPR010255 (SUPERFAMILY)	346.38	2.66667	151.244	3.33333	135.914	30.3333	37.3333	21.7087
DR_011780-RA	GH16	leucine carboxyl methyltransferase 1	F:methyltransferase activity; C:cytoplasmic part; P:primary metabolic process; P:organic substance metabolic process; P:methylation	0	IPR007213 (PFAM); IPR029063 (G3DSA:3.40.50.GENE3D); PTHR13600:SF21 (PANTHER); IPR007213 (PANTHER); IPR029063 (SUPERFAMILY)	NA	NA	44.765	1.33333	17.7059	2.33333	29.3333	14.4782
DR_011841-RA	GH15	Glucoamylase P [Marssonina brunnea multigermtubi MB_m1]	F:glucan 1,4-alpha-glucosidase activity; F:starch binding; P:polysaccharide catabolic process; C:extracellular region	EC:3.2.1.3	IPR000165 (PRINTS); IPR012341 (G3DSA:1.50.10.GENE3D); IPR011613 (PFAM); PTHR31616 (PANTHER); PTHR31616:SF0 (PANTHER); IPR008928 (SUPERFAMILY)	NA	NA	NA	NA	11.7815	0.666667	NA	NA
DR_011841-RA	CBM20	Glucoamylase P [Marssonina brunnea multigermtubi MB_m1]	F:glucan 1,4-alpha-glucosidase activity; F:starch binding; P:polysaccharide catabolic process; C:extracellular region	EC:3.2.1.3	IPR000165 (PRINTS); IPR012341 (G3DSA:1.50.10.GENE3D); IPR011613 (PFAM); PTHR31616 (PANTHER); PTHR31616:SF0 (PANTHER); IPR008928 (SUPERFAMILY)	NA	NA	NA	NA	11.7815	0.666667	NA	NA
DR_011846-RA	AA3	long chain fatty alcohol oxidase [Phialocephala scopiformis]	F:ATP binding; F:oxidoreductase activity, acting on CH-OH group of donors; F:flavin adenine dinucleotide binding; P:oxidation-reduction process	0	IPR007867 (PFAM); IPR023753 (G3DSA:3.50.50.GENE3D); PTHR11552:SF92 (PANTHER); PTHR11552 (PANTHER); IPR023753 (SUPERFAMILY)	NA	NA	NA	NA	12.9955	1	10.6667	7.06245
DR_011848-RA	GH76	glycoside hydrolase family 76	C:nucleus; P:metabolic process; C:cytosol; F:hydrolase activity, acting on glycosyl bonds	0	IPR005198 (PFAM); IPR012341 (G3DSA:1.50.10.GENE3D); PTHR12145 (PANTHER); PTHR12145:SF20 (PANTHER); IPR008928 (SUPERFAMILY)	NA	NA	NA	NA	34.2464	4.33333	10.6667	9.40888
DR_011869-RA	GH63	glucosidase I [Marssonina brunnea multigermtubi MB_m1]	C:endoplasmic reticulum membrane; P:fungal-type cell wall biogenesis; P:protein N-linked glycosylation; F:mannosyl-oligosaccharide glucosidase activity; P:oligosaccharide metabolic process	EC:3.2.1.106	IPR031335 (PFAM); IPR031631 (PFAM); IPR004888 (PANTHER); IPR004888 (PANTHER); PTHR10412:SF11 (PANTHER); PTHR10412:SF11 (PANTHER); IPR008928 (SUPERFAMILY)	NA	NA	72.8767	1	23.6788	4	39.6667	27.0746
DR_011902-RA	GH3	beta-glucosidase D	P:glucan catabolic process; F:beta-glucosidase activity; C:plasma membrane	EC:3.2.1.21	IPR026891 (SMART); IPR002772 (G3DSA:3.40.50.GENE3D); IPR026891 (PFAM); IPR001764 (G3DSA:3.20.20.GENE3D); IPR002772 (PFAM); PTHR30620:SF57 (PANTHER); IPR026892 (PANTHER); IPR026892 (PANTHER); PTHR30620:SF57 (PANTHER); PTHR30620:SF57 (PANTHER); IPR026892 (PANTHER); IPR002772 (SUPERFAMILY); IPR017853 (SUPERFAMILY)	NA	NA	61.7517	0.666667	15.2295	1.66667	25.6667	18.0988
DR_011916-RA	GT90	glycosyltransferase family 90	C:integral component of membrane; F:transferase activity	0	IPR006598 (SMART); IPR006598 (PFAM); PTHR12203:SF22 (PANTHER); PTHR12203 (PANTHER)	NA	NA	NA	NA	NA	NA	17	12.2114
DR_011944-RA	GT31	glycosyltransferase family 31	F:transferase activity, transferring glycosyl groups; C:membrane	0	PTHR23033:SF18 (PANTHER); PTHR23033 (PANTHER); PTHR23033:SF18 (PANTHER); PS51257 (PROSITE_PROFILES)	NA	NA	NA	NA	NA	NA	NA	NA
DR_011945-RA	AA2	heme peroxidase [Phialocephala scopiformis]	F:peroxidase activity; P:response to oxidative stress; F:oxidoreductase activity; F:metal ion binding; P:cellular oxidant detoxification; P:oxidation-reduction process; F:heme binding	0	IPR010255 (SUPERFAMILY)	NA	NA	NA	NA	NA	NA	NA	NA
DR_011949-RA	GH133	glycogen debranching enzyme [Marssonina brunnea multigermtubi MB_m1]	P:glycogen biosynthetic process; C:cytoplasm; P:glycogen catabolic process; F:amylo-alpha-1,6-glucosidase activity; F:4-alpha-glucanotransferase activity	EC:2.4.1.25; EC:3.2.1.33	IPR032790 (PFAM); IPR032788 (PFAM); IPR013781 (G3DSA:3.20.20.GENE3D); IPR032792 (PFAM); IPR029436 (PFAM); PTHR10569:SF2 (PANTHER); IPR010401 (PANTHER); IPR010401 (PANTHER); PTHR10569:SF2 (PANTHER); IPR017853 (SUPERFAMILY); IPR008928 (SUPERFAMILY)	NA	NA	NA	NA	NA	NA	26	13.0724
DR_011977-RA	GH92	glycoside hydrolase family 92	P:carbohydrate metabolic process; F:catalytic activity; F:carbohydrate binding	0	G3DSA:1.20.1610.10 (GENE3D); G3DSA:1.20.1050.60 (GENE3D); IPR012939 (PFAM); IPR014718 (G3DSA:2.70.98.GENE3D); PTHR12143 (PANTHER); PTHR12143 (PANTHER); PTHR12143:SF22 (PANTHER); PTHR12143:SF22 (PANTHER); IPR008928 (SUPERFAMILY)	NA	NA	NA	NA	30.8656	6	18	13.6408
DR_012018-RA	GH3	beta-glucosidase G	C:extracellular space; F:beta-glucosidase activity; P:cellulose catabolic process; F:scopolin beta-glucosidase activity	EC:3.2.1.21	IPR001764 (PRINTS); IPR026891 (SMART); IPR001764 (PFAM); IPR002772 (G3DSA:3.40.50.GENE3D); IPR001764 (G3DSA:3.20.20.GENE3D); IPR002772 (PFAM); IPR026891 (PFAM); IPR026892 (PANTHER); PTHR30620:SF53 (PANTHER); PTHR30620:SF53 (PANTHER); IPR002772 (SUPERFAMILY); IPR017853 (SUPERFAMILY)	NA	NA	NA	NA	16.5404	2	18.6667	12.4962
DR_012022-RA	CE14	N-acetylglucosaminyl-phosphatidylinositol de-N-acetylase [Marssonina brunnea multigermtubi MB_m1]	C:membrane; C:integral component of membrane	0	IPR003737 (PFAM); IPR024078 (G3DSA:3.40.50.GENE3D); IPR003737 (PANTHER); PTHR12993:SF11 (PANTHER); IPR024078 (SUPERFAMILY)	NA	NA	NA	NA	NA	NA	NA	NA
DR_012023-RA	CE10	lipase [Marssonina brunnea multigermtubi MB_m1]	P:metabolic process; F:hydrolase activity	0	IPR013094 (PFAM); IPR029058 (G3DSA:3.40.50.GENE3D); PTHR23024:SF156 (PANTHER); PTHR23024:SF156 (PANTHER); PTHR23024 (PANTHER); IPR029058 (SUPERFAMILY)	NA	NA	NA	NA	NA	NA	10.6667	10.1557
DR_012042-RA	PL3	pectate lyase	F:pectate lyase activity; C:extracellular region	EC:4.2.2.2	IPR004898 (PFAM); IPR012334 (G3DSA:2.160.20.GENE3D); PTHR33407:SF7 (PANTHER); PTHR33407 (PANTHER); IPR011050 (SUPERFAMILY)	NA	NA	240.774	6	68.3364	14	10.6667	12.3078
DR_012069-RA	GT2	Nucleotide-diphospho-sugar transferase [Glarea lozoyensis ATCC 20868]	C:integral component of membrane; F:transferase activity	0	PTHR35408:SF1 (PANTHER); PTHR35408 (PANTHER); PTHR35408 (PANTHER); PTHR35408:SF1 (PANTHER)	NA	NA	NA	NA	3.54494	1	7.33333	3.89783
DR_012100-RA	GT15	alpha-mannosyltransferase [Marssonina brunnea multigermtubi MB_m1]	P:cell wall mannoprotein biosynthetic process; P:mannosylation; C:integral component of membrane; P:protein N-linked glycosylation; C:Golgi apparatus; F:alpha-1,2-mannosyltransferase activity	EC:2.4.1	IPR029044 (G3DSA:3.90.550.GENE3D); IPR002685 (PFAM); PTHR31121:SF2 (PANTHER); IPR002685 (PANTHER); IPR029044 (SUPERFAMILY)	NA	NA	NA	NA	2.37945	0.666667	31.3333	24.4079
DR_012104-RA	GH105	cell wall glycosyl hydrolase [Marssonina brunnea multigermtubi MB_m1]	F:catalytic activity	0	IPR012341 (G3DSA:1.50.10.GENE3D); IPR010905 (PFAM); PTHR33886 (PANTHER); PTHR33886:SF3 (PANTHER); IPR008928 (SUPERFAMILY)	NA	NA	426.067	8	364.209	55	107.667	89.9821
DR_012118-RA	AA2	cytochrome c peroxidase	F:peroxidase activity; P:response to oxidative stress; F:metal ion binding; P:cellular oxidant detoxification; P:oxidation-reduction process; F:heme binding	EC:1.11.1.7	IPR002207 (PRINTS); IPR002016 (PRINTS); G3DSA:1.10.420.10 (GENE3D); G3DSA:1.10.520.10 (GENE3D); IPR002016 (PFAM); PTHR31356:SF3 (PANTHER); PTHR31356:SF3 (PANTHER); PTHR31356 (PANTHER); PTHR31356 (PANTHER); IPR002016 (PROSITE_PROFILES); IPR010255 (SUPERFAMILY)	NA	NA	33.5264	1	17.8216	5	12	13.8861
DR_012166-RA	GH27	alpha-galactosidase D	F:alpha-galactosidase activity; P:glycoside catabolic process; P:carbohydrate metabolic process; C:cytoplasm	EC:3.2.1.22	IPR002241 (PRINTS); IPR013785 (G3DSA:3.20.20.GENE3D); IPR002241 (PFAM); IPR013780 (G3DSA:2.60.40.GENE3D); PTHR11452 (PANTHER); PTHR11452:SF35 (PANTHER); SSF51011 (SUPERFAMILY); IPR017853 (SUPERFAMILY)	NA	NA	67.0528	2	14.2095	1.33333	11.3333	8.60115
DR_012201-RA	GH76	endo GH76 family [Marssonina brunnea multigermtubi MB_m1]	F:mannan endo-1,6-alpha-mannosidase activity; P:carbohydrate catabolic process; C:integral component of membrane	EC:3.2.1.101	IPR005198 (PFAM); IPR012341 (G3DSA:1.50.10.GENE3D); PTHR12145:SF16 (PANTHER); PTHR12145 (PANTHER); IPR008928 (SUPERFAMILY)	651.139	6	319.027	8.33333	210.641	43.3333	114	76.0854
DR_012203-RA	GT90	capsule associated [Marssonina brunnea multigermtubi MB_m1]	C:membrane; C:integral component of membrane; F:transferase activity	0	IPR006598 (SMART); IPR006598 (PFAM); PTHR12203:SF22 (PANTHER); PTHR12203 (PANTHER); PTHR12203:SF22 (PANTHER); PTHR12203 (PANTHER)	NA	NA	NA	NA	32.9355	4	26.6667	21.7339
DR_012235-RA	GT32	glycosyltransferase family 32 [Phialocephala scopiformis]	F:mannosyltransferase activity; C:Golgi membrane; P:mannosyl-inositol phosphorylceramide biosynthetic process	EC:2.4.1	IPR007577 (PFAM); PTHR32385:SF2 (PANTHER); PTHR32385 (PANTHER); IPR029044 (SUPERFAMILY)	NA	NA	NA	NA	8.30384	2.33333	6.66667	7.01125
DR_012255-RA	GH18	extracellular chitinase [Marssonina brunnea multigermtubi MB_m1]	F:hydrolase activity, hydrolyzing O-glycosyl compounds; P:organic substance metabolic process	0	IPR001002 (SMART); IPR001002 (PFAM); IPR013781 (G3DSA:3.20.20.GENE3D); IPR001002 (G3DSA:3.30.60.GENE3D); IPR001223 (PFAM); PTHR11177:SF207 (PANTHER); PTHR11177:SF207 (PANTHER); PTHR11177 (PANTHER); PTHR11177 (PANTHER); IPR001002 (PRODOM); IPR001002 (PROSITE_PROFILES); IPR001002 (SUPERFAMILY); IPR017853 (SUPERFAMILY)	NA	NA	NA	NA	30.6045	3.33333	492.333	418.57
DR_012259-RA	GH76	glycosyl hydrolase family 76	P:metabolic process; F:hydrolase activity, acting on glycosyl bonds	0	IPR012341 (G3DSA:1.50.10.GENE3D); IPR005198 (PFAM); PTHR12145 (PANTHER); PTHR12145:SF14 (PANTHER); IPR008928 (SUPERFAMILY)	NA	NA	NA	NA	NA	NA	NA	NA
DR_012303-RA	CE10	ATP-dependent RNA helicase DBP8	F:ATP binding; P:endonucleolytic cleavage to generate mature 5'-end of SSU-rRNA from (SSU-rRNA, 5.8S rRNA, LSU-rRNA); F:RNA binding; P:endonucleolytic cleavage in 5'-ETS of tricistronic rRNA transcript (SSU-rRNA, 5.8S rRNA, LSU-rRNA); P:RNA secondary structure unwinding; P:endonucleolytic cleavage in ITS1 to separate SSU-rRNA from 5.8S rRNA and LSU-rRNA from tricistronic rRNA transcript (SSU-rRNA…	0	IPR001650 (SMART); IPR014001 (SMART); IPR027417 (G3DSA:3.40.50.GENE3D); IPR011545 (PFAM); IPR001650 (PFAM); IPR027417 (G3DSA:3.40.50.GENE3D); PTHR24031 (PANTHER); PTHR24031:SF256 (PANTHER); IPR014014 (PROSITE_PROFILES); IPR001650 (PROSITE_PROFILES); IPR014001 (PROSITE_PROFILES); IPR027417 (SUPERFAMILY)	NA	NA	84.0774	1.33333	27.1268	5	27.3333	16.7704
DR_012304-RA	AA7	24-dehydrocholesterol reductase precursor [Marssonina brunnea multigermtubi MB_m1]	F:oxidoreductase activity, acting on CH-OH group of donors; F:flavin adenine dinucleotide binding; P:steroid metabolic process; P:oxidation-reduction process; F:delta24(24-1) sterol reductase activity	EC:1.3.1.71	IPR006094 (PFAM); IPR016169 (G3DSA:3.30.465.GENE3D); PTHR10801 (PANTHER); PTHR10801:SF3 (PANTHER); IPR016166 (PROSITE_PROFILES); IPR016166 (SUPERFAMILY)	NA	NA	NA	NA	15.4907	4.33333	27.6667	22.5965
DR_012314-RA	CE4	RING finger domain [Marssonina brunnea multigermtubi MB_m1]	C:nucleus; F:ubiquitin-protein transferase activity; F:zinc ion binding; P:mitotic cell cycle checkpoint; C:membrane; P:ubiquitin-dependent protein catabolic process	0	IPR001452 (SMART); IPR000433 (SMART); G3DSA:2.30.30.40 (GENE3D); PTHR16079:SF4 (PANTHER); PTHR16079 (PANTHER); PTHR16079:SF4 (PANTHER); PTHR16079 (PANTHER); IPR001452 (PROSITE_PROFILES); SSF57850 (SUPERFAMILY); SSF57850 (SUPERFAMILY); IPR001452 (SUPERFAMILY)	NA	NA	NA	NA	NA	NA	10.6667	6.01092
DR_012315-RA	GH27	alpha-galactosidase alpha-n-acetylgalactosaminidase [Marssonina brunnea multigermtubi MB_m1]	P:carbohydrate metabolic process; F:raffinose alpha-galactosidase activity	EC:3.2.1.22	IPR002241 (PRINTS); IPR002241 (PFAM); IPR013785 (G3DSA:3.20.20.GENE3D); PTHR11452:SF12 (PANTHER); PTHR11452 (PANTHER); IPR017853 (SUPERFAMILY)	NA	NA	NA	NA	NA	NA	2	1.17349
DR_012317-RA	AA4	D-lactate dehydrogenase (cytochrome) [Marssonina brunnea multigermtubi MB_m1]	F:D-lactate dehydrogenase (cytochrome) activity; F:flavin adenine dinucleotide binding; P:cellular carbohydrate metabolic process; C:integral component of membrane; P:aerobic respiration; C:mitochondrial inner membrane	EC:1.1.2.4	IPR006094 (PFAM); IPR016167 (G3DSA:3.30.43.GENE3D); IPR004113 (PFAM); IPR016169 (G3DSA:3.30.465.GENE3D); PTHR11748 (PANTHER); PTHR11748:SF35 (PANTHER); IPR016166 (PROSITE_PROFILES); IPR016166 (SUPERFAMILY); IPR016164 (SUPERFAMILY)	NA	NA	NA	NA	20.0557	5.66667	42.6667	31.3282
DR_012319-RA	GH64	glucanase B [Marssonina brunnea multigermtubi MB_m1]	F:hydrolase activity	0	IPR032477 (PFAM); PTHR38165:SF1 (PANTHER); PTHR38165 (PANTHER)	NA	NA	NA	NA	NA	NA	8.66667	6.58847
DR_012321-RA	CE3	carbohydrate esterase family 3	F:lysophospholipase activity; C:membrane; C:integral component of membrane; F:hydrolase activity	0	IPR013830 (G3DSA:3.40.50.GENE3D); IPR013830 (PFAM); PTHR30383:SF4 (PANTHER); PTHR30383 (PANTHER); IPR013830 (SUPERFAMILY)	NA	NA	NA	NA	NA	NA	NA	NA
DR_012328-RA	GH2	glycoside hydrolase family 2	F:beta-mannosidase activity; P:carbohydrate metabolic process; C:intracellular membrane-bounded organelle	EC:3.2.1.25	IPR013812 (G3DSA:2.60.40.GENE3D); IPR006102 (PFAM); IPR013781 (G3DSA:3.20.20.GENE3D); PTHR10066:SF68 (PANTHER); PTHR10066 (PANTHER); IPR017853 (SUPERFAMILY); IPR006102 (SUPERFAMILY); IPR006102 (SUPERFAMILY)	NA	NA	NA	NA	NA	NA	9	5.70823
DR_012335-RA	GH2	glycosyl hydrolase family 2 [Marssonina brunnea multigermtubi MB_m1]	P:carbohydrate metabolic process; C:beta-galactosidase complex; F:carbohydrate binding; F:beta-galactosidase activity	EC:3.2.1.23	IPR006101 (PRINTS); IPR013781 (G3DSA:3.20.20.GENE3D); IPR006103 (PFAM); IPR013812 (G3DSA:2.60.40.GENE3D); IPR006102 (PFAM); PTHR10066:SF72 (PANTHER); PTHR10066 (PANTHER); IPR006102 (SUPERFAMILY); IPR017853 (SUPERFAMILY)	NA	NA	NA	NA	NA	NA	5.66667	2.64932
DR_012338-RA	GH71	glycoside hydrolase family 71	F:hydrolase activity	0	IPR005197 (PFAM); PTHR10566:SF89 (PANTHER); PTHR10566 (PANTHER)	NA	NA	NA	NA	NA	NA	NA	NA
DR_012381-RA	GH76	mannan endo-1,6-alpha-mannosidase [Phialocephala scopiformis]	C:integral component of membrane; F:hydrolase activity	0	IPR005198 (PFAM); IPR012341 (G3DSA:1.50.10.GENE3D); PTHR12145:SF23 (PANTHER); PTHR12145 (PANTHER); IPR008928 (SUPERFAMILY)	NA	NA	NA	NA	NA	NA	22.6667	21.9993
DR_012385-RA	GH17	glucan endo-1,3-beta-glucosidase eglC [Marssonina brunnea multigermtubi MB_m1]	P:carbohydrate metabolic process; F:transferase activity, transferring glycosyl groups; F:hydrolase activity, hydrolyzing O-glycosyl compounds; C:intrinsic component of membrane; C:cell periphery	0	IPR013781 (G3DSA:3.20.20.GENE3D); PTHR16631:SF13 (PANTHER); PTHR16631 (PANTHER); IPR017853 (SUPERFAMILY)	NA	NA	NA	NA	NA	NA	9.66667	7.01039
DR_012386-RA	GH76	glycoside hydrolase family 76	F:mannan endo-1,6-alpha-mannosidase activity; P:carbohydrate catabolic process; C:integral component of membrane	EC:3.2.1.101	IPR005198 (PFAM); PTHR12145 (PANTHER); PTHR12145:SF23 (PANTHER)	NA	NA	NA	NA	NA	NA	NA	NA
DR_012420-RA	GT4	alpha-1,2-mannosyltransferase alg-11 [Purpureocillium lilacinum]	C:endoplasmic reticulum membrane; P:oligosaccharide-lipid intermediate biosynthetic process; P:mannosylation; C:integral component of membrane; P:protein glycosylation; P:oligosaccharide biosynthetic process; F:alpha-1,2-mannosyltransferase activity	EC:2.4.1	IPR031814 (PFAM); G3DSA:3.40.50.2000 (GENE3D); IPR001296 (PFAM); PTHR12526:SF315 (PANTHER); PTHR12526 (PANTHER); SSF53756 (SUPERFAMILY)	NA	NA	NA	NA	9.56628	2.66667	6.33333	4.75481
DR_012429-RA	GH76	glycosyl hydrolase family 76	P:metabolic process; F:hydrolase activity, acting on glycosyl bonds	0	IPR012341 (G3DSA:1.50.10.GENE3D); IPR005198 (PFAM); PTHR12145:SF14 (PANTHER); PTHR12145 (PANTHER); IPR008928 (SUPERFAMILY)	NA	NA	NA	NA	NA	NA	NA	NA
DR_012434-RA	GH125	DUF1237 domain [Marssonina brunnea multigermtubi MB_m1]	P:metabolic process; C:endoplasmic reticulum; F:hydrolase activity, acting on glycosyl bonds	0	IPR008313 (SMART); IPR008313 (PFAM); IPR008313 (PIRSF); IPR012341 (G3DSA:1.50.10.GENE3D); PTHR31047:SF0 (PANTHER); PTHR31047 (PANTHER); IPR008928 (SUPERFAMILY)	NA	NA	134.068	4	95.937	24.3333	61.3333	47.0626
DR_012453-RA	CE5	alpha beta-Hydrolase [Glarea lozoyensis ATCC 20868]	P:metabolic process; C:extracellular region; F:cutinase activity; F:carboxylic ester hydrolase activity; F:hydrolase activity	0	IPR029058 (G3DSA:3.40.50.GENE3D); IPR000675 (PFAM)	NA	NA	NA	NA	NA	NA	3.33333	3.24976
DR_012470-RA	GH78	alpha-L-rhamnosidase [Marssonina brunnea multigermtubi MB_m1]	F:hydrolase activity	0	IPR008902 (PFAM); IPR013737 (PFAM); IPR008979 (G3DSA:2.60.120.GENE3D); IPR008979 (G3DSA:2.60.120.GENE3D); PTHR33307 (PANTHER); PTHR33307:SF5 (PANTHER); IPR000909 (PROSITE_PROFILES); IPR008928 (SUPERFAMILY); IPR008979 (SUPERFAMILY)	NA	NA	NA	NA	5.87592	1.66667	3.33333	1.88211
DR_012470-RA	CBM67	alpha-L-rhamnosidase [Marssonina brunnea multigermtubi MB_m1]	F:hydrolase activity	0	IPR008902 (PFAM); IPR013737 (PFAM); IPR008979 (G3DSA:2.60.120.GENE3D); IPR008979 (G3DSA:2.60.120.GENE3D); PTHR33307 (PANTHER); PTHR33307:SF5 (PANTHER); IPR000909 (PROSITE_PROFILES); IPR008928 (SUPERFAMILY); IPR008979 (SUPERFAMILY)	NA	NA	NA	NA	5.87592	1.66667	3.33333	1.88211
DR_012496-RA	CE10	triacylglycerol lipase	F:nucleotide binding; P:cation transport; C:membrane; F:carboxylic ester hydrolase activity	EC:3.1.1.1	IPR029058 (G3DSA:3.40.50.GENE3D); IPR002018 (PFAM); PTHR11559 (PANTHER); PTHR11559:SF249 (PANTHER); IPR029058 (SUPERFAMILY)	NA	NA	NA	NA	NA	NA	NA	NA
DR_012499-RA	GH72	glycoside hydrolase family 72	P:fungal-type cell wall organization; C:fungal-type cell wall; P:fungal-type cell wall (1->3)-beta-D-glucan biosynthetic process; C:anchored component of external side of plasma membrane; F:1,3-beta-glucanosyltransferase activity; F:hydrolase activity	0	IPR004886 (PFAM); PTHR31468:SF5 (PANTHER); PTHR31468 (PANTHER)	NA	NA	NA	NA	NA	NA	NA	NA
DR_012519-RA	GH16	glycoside hydrolase family 16	P:carbohydrate metabolic process; F:hydrolase activity, hydrolyzing O-glycosyl compounds	0	IPR013320 (G3DSA:2.60.120.GENE3D); IPR000757 (PFAM); PTHR38121:SF1 (PANTHER); PTHR38121 (PANTHER); IPR000757 (PROSITE_PROFILES); IPR013320 (SUPERFAMILY)	NA	NA	NA	NA	NA	NA	NA	NA
DR_012541-RA	GH16	glycosyl hydrolase family 16	P:fungal-type cell wall organization; C:incipient cellular bud site; F:transferase activity, transferring glycosyl groups; C:fungal-type cell wall; F:hydrolase activity, hydrolyzing O-glycosyl compounds; F:carbohydrate binding; P:cell wall chitin metabolic process	0	IPR000757 (PFAM); IPR013320 (G3DSA:2.60.120.GENE3D); PTHR10963 (PANTHER); PTHR10963:SF38 (PANTHER); IPR000757 (PROSITE_PROFILES); IPR013320 (SUPERFAMILY)	NA	NA	NA	NA	NA	NA	9	9.04739
DR_012544-RA	CE10	alpha beta-hydrolase	P:metabolic process; C:integral component of membrane; F:hydrolase activity	0	IPR013094 (PFAM); IPR029058 (G3DSA:3.40.50.GENE3D); PTHR23024 (PANTHER); PTHR23024:SF102 (PANTHER); PTHR23024:SF102 (PANTHER); PTHR23024 (PANTHER); IPR029058 (SUPERFAMILY)	NA	NA	NA	NA	NA	NA	4	3.72927
DR_012559-RA	CE5	carbohydrate esterase family 5	P:metabolic process; F:hydrolase activity	0	IPR000675 (SMART); IPR029058 (G3DSA:3.40.50.GENE3D); IPR000675 (PFAM); PTHR33630 (PANTHER); PTHR33630:SF1 (PANTHER); IPR029058 (SUPERFAMILY)	NA	NA	NA	NA	NA	NA	NA	NA
DR_012570-RA	GT1	isoleucyl-tRNA synthetase [Marssonina brunnea multigermtubi MB_m1]	P:isoleucyl-tRNA aminoacylation; F:ATP binding; P:carbohydrate metabolic process; F:isoleucine-tRNA ligase activity; F:transferase activity, transferring hexosyl groups; P:regulation of translational fidelity; F:aminoacyl-tRNA editing activity; C:cytosol; P:lipid glycosylation	EC:6.1.1.5	IPR002213 (PFAM); IPR004276 (PFAM); G3DSA:3.40.50.2000 (GENE3D); G3DSA:3.40.50.2000 (GENE3D); IPR002213 (PANTHER); PTHR11926:SF164 (PANTHER); SSF53756 (SUPERFAMILY)	NA	NA	NA	NA	NA	NA	14.6667	7.85837
DR_012618-RA	GH16	Crh [Marssonina brunnea multigermtubi MB_m1]	C:fungal-type cell wall; F:IgE binding; F:hydrolase activity	0	IPR013320 (G3DSA:2.60.120.GENE3D); PTHR10963:SF35 (PANTHER); PTHR10963 (PANTHER); IPR013320 (SUPERFAMILY)	2334.54	19.6667	1097.19	25.6667	476.884	88.6667	110.333	92.4639
DR_012624-RA	CE16	cellulose-binding GDSL lipase acylhydrolase [Marssonina brunnea multigermtubi MB_m1]	F:hydrolase activity	0	IPR013830 (G3DSA:3.40.50.GENE3D); PTHR22835 (PANTHER); PTHR22835:SF113 (PANTHER); IPR013830 (SUPERFAMILY)	NA	NA	NA	NA	NA	NA	1	1.56702
DR_012703-RA	CE10	alpha beta-hydrolase [Phialocephala scopiformis]	F:hydrolase activity	0	IPR002018 (PFAM); IPR029058 (G3DSA:3.40.50.GENE3D); PTHR11559 (PANTHER); PTHR11559:SF160 (PANTHER); IPR029058 (SUPERFAMILY)	NA	NA	NA	NA	3.54494	1	14.6667	13.4706
DR_012776-RA	CE10	BEM46 family	C:integral component of membrane; C:endoplasmic reticulum; F:hydrolase activity	0	IPR022742 (PFAM); IPR029058 (G3DSA:3.40.50.GENE3D); PTHR12277 (PANTHER); IPR029058 (SUPERFAMILY)	NA	NA	NA	NA	NA	NA	5	9.09761
DR_012832-RA	GH131	hypothetical protein MBM_04331 [Marssonina brunnea f. sp. 'multigermtubi' MB_m1]	0	0	PTHR34612:SF2 (PANTHER); PTHR34612 (PANTHER)	120.146	1	901.518	18.6667	230.92	46.3333	36.6667	25.1422
DR_012882-RA	CBM50	domain-containing [Marssonina brunnea multigermtubi MB_m1]	0	0	IPR018392 (G3DSA:3.10.350.GENE3D); PTHR20932:SF15 (PANTHER); PTHR20932 (PANTHER); IPR018392 (SUPERFAMILY)	NA	NA	NA	NA	NA	NA	19.3333	16.0297
DR_012888-RA	PL3	pectate lyase [Marssonina brunnea multigermtubi MB_m1]	F:catalytic activity	0	no IPS match	NA	NA	1209.5	26.6667	87.2938	22	18.6667	14.7736
DR_012893-RA	CE12	acetylesterase [Verticillium dahliae ]	F:metal ion binding; F:oxidoreductase activity; P:oxidation-reduction process; F:iron-sulfur cluster binding; F:2 iron, 2 sulfur cluster binding; F:hydrolase activity	0	IPR013830 (G3DSA:3.40.50.GENE3D); PTHR31321:SF29 (PANTHER); PTHR31321 (PANTHER); IPR013830 (SUPERFAMILY)	NA	NA	NA	NA	NA	NA	NA	NA
DR_012901-RA	GT21	glycosyltransferase family 21	P:glucosylceramide biosynthetic process; F:ceramide glucosyltransferase activity; C:integral component of membrane	EC:2.4.1.80	PF13641 (PFAM); IPR029044 (G3DSA:3.90.550.GENE3D); PTHR12726 (PANTHER); PTHR12726:SF0 (PANTHER); IPR029044 (SUPERFAMILY)	NA	NA	61.7138	0.666667	28.5831	5.33333	21	16.5623
DR_012907-RA	GT32	glycosyltransferase sugar-binding region containing DXD domain-containing [Marssonina brunnea multigermtubi MB_m1]	P:N-glycan processing; P:mannosylation; F:alpha-1,6-mannosyltransferase activity; C:alpha-1,6-mannosyltransferase complex	EC:2.4.1	IPR007577 (PFAM); PTHR31834 (PANTHER); PTHR31834:SF1 (PANTHER); IPR029044 (SUPERFAMILY)	NA	NA	NA	NA	NA	NA	16.6667	18.2383
DR_012949-RA	GT31	glycosyltransferase family 31	C:membrane; C:integral component of membrane; F:transferase activity	0	IPR006740 (PFAM); PTHR10811:SF24 (PANTHER); PTHR10811 (PANTHER)	NA	NA	NA	NA	5.92439	1.66667	14	13.1772
DR_012960-RA	GT71	alpha-1,2-mannosyltransferase (Mnn2) [Marssonina brunnea multigermtubi MB_m1]	F:transferase activity	0	IPR029044 (G3DSA:3.90.550.GENE3D); IPR022751 (PFAM); PTHR31646 (PANTHER); PTHR31646:SF1 (PANTHER); IPR029044 (SUPERFAMILY)	NA	NA	NA	NA	NA	NA	8.33333	11.0942
DR_012961-RA	GH47	glycoside hydrolase family 47	C:membrane; F:hydrolase activity, acting on glycosyl bonds	0	IPR001382 (PRINTS); IPR001382 (PFAM); IPR001382 (G3DSA:1.50.10.GENE3D); PTHR11742:SF49 (PANTHER); PTHR11742 (PANTHER); PTHR11742 (PANTHER); PTHR11742:SF49 (PANTHER); IPR001382 (SUPERFAMILY)	111.075	1.33333	67.0906	2	65.198	15.6667	57	47.3609
DR_012962-RA	GH7	cellobiohydrolase precursor [Marssonina brunnea multigermtubi MB_m1]	P:polysaccharide catabolic process; F:hydrolase activity, hydrolyzing O-glycosyl compounds	0	IPR001722 (PRINTS); IPR001722 (PFAM); PTHR33753 (PANTHER); PTHR33753:SF2 (PANTHER); IPR013320 (SUPERFAMILY)	NA	NA	NA	NA	NA	NA	NA	NA
DR_012963-RA	CE3	SGNH hydrolase [Glarea lozoyensis ATCC 20868]	P:carbohydrate metabolic process; P:proteolysis; P:lipid metabolic process; F:serine-type endopeptidase activity; F:phosphoric diester hydrolase activity; F:hydrolase activity, hydrolyzing O-glycosyl compounds; F:hydrolase activity	0	G3DSA:2.130.10.130 (GENE3D); IPR013830 (G3DSA:3.40.50.GENE3D); IPR001087 (PFAM); PF13517 (PFAM); PTHR30383 (PANTHER); PTHR30383:SF9 (PANTHER); SSF69318 (SUPERFAMILY); IPR013830 (SUPERFAMILY)	NA	NA	NA	NA	NA	NA	18.3333	11.5229
DR_012965-RA	AA7	glucooligosaccharide oxidase [Marssonina brunnea multigermtubi MB_m1]	F:oxidoreductase activity, acting on CH-OH group of donors; F:flavin adenine dinucleotide binding; P:oxidation-reduction process	0	IPR012951 (PFAM); PTHR11748 (PANTHER); PTHR11748:SF77 (PANTHER); IPR016166 (SUPERFAMILY)	NA	NA	61.7138	0.666667	22.3194	3.66667	20.6667	18.4701
DR_012971-RA	GT20	glycosyltransferase family 20 [Marssonina brunnea multigermtubi MB_m1]	F:ATP binding; F:ATPase activity, coupled to transmembrane movement of substances; P:cellular response to heat; C:alpha,alpha-trehalose-phosphate synthase complex (UDP-forming); F:trehalose-phosphatase activity; C:integral component of membrane; F:amino acid transmembrane transporter activity; P:trehalose biosynthetic process; F:transferase activity; P:dephosphorylation; P:amino acid transmembran…	EC:3.1.3.12	IPR001830 (PFAM); IPR003337 (TIGRFAM); G3DSA:3.40.50.2000 (GENE3D); G3DSA:3.40.50.2000 (GENE3D); IPR003337 (PFAM); IPR023214 (G3DSA:3.40.50.GENE3D); PTHR10788:SF45 (PANTHER); PTHR10788 (PANTHER); IPR023214 (SUPERFAMILY); SSF53756 (SUPERFAMILY)	NA	NA	NA	NA	NA	NA	62.3333	39.0048
DR_013051-RA	AA8	cellobiose dehydrogenase [Verticillium alfalfae ]	F:oxidoreductase activity, acting on CH-OH group of donors; F:flavin adenine dinucleotide binding; C:membrane; P:oxidation-reduction process	0	IPR023753 (G3DSA:3.50.50.GENE3D); G3DSA:3.30.410.10 (GENE3D); IPR000172 (PFAM); PTHR11552 (PANTHER); PTHR11552:SF57 (PANTHER); SSF54373 (SUPERFAMILY); IPR023753 (SUPERFAMILY)	NA	NA	67.1285	2	48.5716	8.33333	127.333	83.9279
DR_013051-RA	AA8	cellobiose dehydrogenase [Verticillium alfalfae ]	F:oxidoreductase activity, acting on CH-OH group of donors; F:flavin adenine dinucleotide binding; C:membrane; P:oxidation-reduction process	0	IPR023753 (G3DSA:3.50.50.GENE3D); G3DSA:3.30.410.10 (GENE3D); IPR000172 (PFAM); PTHR11552 (PANTHER); PTHR11552:SF57 (PANTHER); SSF54373 (SUPERFAMILY); IPR023753 (SUPERFAMILY)	NA	NA	67.1285	2	48.5716	8.33333	127.333	83.9279
DR_013083-RA	GH78	glycoside hydrolase family 78	F:hydrolase activity	0	IPR012341 (G3DSA:1.50.10.GENE3D); IPR032790 (PFAM); PTHR34987 (PANTHER); PTHR34987:SF1 (PANTHER); IPR008928 (SUPERFAMILY)	NA	NA	NA	NA	NA	NA	NA	NA
DR_013089-RA	CE12	SGNH hydrolase [Dichomitus squalens LYAD-421 SS1]	F:hydrolase activity	0	IPR013830 (G3DSA:3.40.50.GENE3D); PTHR31321:SF28 (PANTHER); PTHR31321 (PANTHER); IPR013830 (SUPERFAMILY)	NA	NA	1047.84	20.6667	464.327	88	96.6667	92.2287
DR_013206-RA	GH109	N-terminal [Penicillium expansum]	F:oxidoreductase activity; P:oxidation-reduction process	0	G3DSA:3.30.360.10 (GENE3D); PTHR22604:SF128 (PANTHER); PTHR22604 (PANTHER); SSF55347 (SUPERFAMILY)	NA	NA	NA	NA	29.3905	3	2.33333	2.58926
DR_013227-RA	CE5	carbohydrate esterase family 5	F:hydrolase activity	0	IPR000675 (PFAM); IPR029058 (G3DSA:3.40.50.GENE3D); PTHR15087 (PANTHER); PTHR15087:SF13 (PANTHER); IPR029058 (SUPERFAMILY)	NA	NA	NA	NA	17.6575	2.33333	NA	NA
DR_013228-RA	AA7	fad binding domain-containing	F:catalytic activity	0	IPR016169 (G3DSA:3.30.465.GENE3D); IPR006094 (PFAM); PTHR11748 (PANTHER); PTHR11748:SF100 (PANTHER); IPR016166 (PROSITE_PROFILES); IPR016166 (SUPERFAMILY)	NA	NA	NA	NA	NA	NA	17.6667	14.6751
DR_013265-RA	CE1	dienelactone hydrolase family [Marssonina brunnea multigermtubi MB_m1]	F:hydrolase activity	0	IPR029058 (G3DSA:3.40.50.GENE3D); IPR002925 (PFAM); PTHR17630 (PANTHER); PTHR17630:SF34 (PANTHER); PTHR17630:SF34 (PANTHER); PTHR17630 (PANTHER); IPR029058 (SUPERFAMILY)	210.639	1.66667	213.071	4	69.7443	14.3333	54.6667	59.2806
DR_013275-RA	GH17	glycoside hydrolase family 17	P:carbohydrate metabolic process; C:integral component of membrane; F:hydrolase activity, hydrolyzing O-glycosyl compounds	0	IPR000490 (PFAM); IPR013781 (G3DSA:3.20.20.GENE3D); PTHR16631 (PANTHER); PTHR16631:SF11 (PANTHER); IPR017853 (SUPERFAMILY)	NA	NA	NA	NA	NA	NA	47.6667	34.2279
DR_013288-RA	CE1	epoxide hydrolase	P:halogenated hydrocarbon catabolic process; F:haloalkane dehalogenase activity	EC:3.8.1.5	IPR000073 (PRINTS); IPR000639 (PRINTS); IPR000073 (PFAM); IPR029058 (G3DSA:3.40.50.GENE3D); PTHR10992 (PANTHER); PTHR10992:SF877 (PANTHER); IPR029058 (SUPERFAMILY)	NA	NA	NA	NA	50.6602	9	14	14.8211
DR_013298-RA	GH31	alpha-xylosidase [Marssonina brunnea multigermtubi MB_m1]	P:carbohydrate metabolic process; F:hydrolase activity, hydrolyzing O-glycosyl compounds	0	IPR000322 (PFAM); PTHR22762:SF89 (PANTHER); PTHR22762 (PANTHER); IPR017853 (SUPERFAMILY)	NA	NA	NA	NA	18.9387	5.33333	27.6667	20.7439
DR_013320-RA	AA4	glycolate oxidase	F:oxidoreductase activity, acting on CH-OH group of donors; F:flavin adenine dinucleotide binding; C:integral component of membrane; P:oxidation-reduction process	0	IPR006094 (PFAM); IPR016167 (G3DSA:3.30.43.GENE3D); IPR016169 (G3DSA:3.30.465.GENE3D); IPR004113 (PFAM); PTHR11748 (PANTHER); PTHR11748:SF81 (PANTHER); IPR016166 (PROSITE_PROFILES); IPR016166 (SUPERFAMILY); IPR016164 (SUPERFAMILY)	NA	NA	NA	NA	3.59341	1	9	5.44932
DR_013330-RA	GT90	glycosyltransferase family 90	C:integral component of membrane; C:endomembrane system; F:glucosyltransferase activity; P:glycolipid metabolic process	EC:2.4.1	IPR006598 (SMART); IPR006598 (PFAM); PTHR12203:SF26 (PANTHER); PTHR12203 (PANTHER); PTHR12203 (PANTHER); PTHR12203:SF26 (PANTHER)	NA	NA	NA	NA	34.3433	4.33333	9.66667	5.87256
DR_013334-RA	GT22	GPI mannosyltransferase 4	P:GPI anchor biosynthetic process; P:mannosylation; C:integral component of membrane; F:dolichyl-phosphate-mannose-glycolipid alpha-mannosyltransferase activity; P:plasmid maintenance	EC:2.4.1.130	IPR005599 (PFAM); PTHR22760:SF3 (PANTHER); IPR005599 (PANTHER)	NA	NA	22.3635	0.666667	2.37945	0.666667	6.33333	4.4893
DR_013347-RA	GH76	glycosyl hydrolase	F:hydrolase activity	0	IPR012341 (G3DSA:1.50.10.GENE3D); IPR005198 (PFAM); PTHR12145:SF14 (PANTHER); PTHR12145 (PANTHER); IPR008928 (SUPERFAMILY)	NA	NA	NA	NA	NA	NA	NA	NA
DR_013353-RA	CE12	gdsl-like lipase acylhydrolase [Neofusicoccum parvum UCRNP2]	F:hydrolase activity	0	IPR013830 (G3DSA:3.40.50.GENE3D); PTHR31321 (PANTHER); PTHR31321:SF29 (PANTHER); IPR013830 (SUPERFAMILY)	NA	NA	NA	NA	NA	NA	NA	NA
DR_013385-RA	GH18	extracellular chitinase [Marssonina brunnea multigermtubi MB_m1]	F:hydrolase activity, hydrolyzing O-glycosyl compounds; P:organic substance metabolic process	0	IPR001002 (SMART); IPR013781 (G3DSA:3.20.20.GENE3D); IPR001223 (PFAM); IPR001002 (G3DSA:3.30.60.GENE3D); IPR001002 (PFAM); PTHR11177 (PANTHER); PTHR11177:SF207 (PANTHER); PTHR11177:SF207 (PANTHER); PTHR11177 (PANTHER); IPR001002 (PRODOM); IPR001002 (PROSITE_PROFILES); IPR001002 (SUPERFAMILY); IPR017853 (SUPERFAMILY)	NA	NA	72.9146	1	21.4151	6	529	460.697
DR_013406-RA	AA3	choline dehydrogenase [Marssonina brunnea multigermtubi MB_m1]	F:oxidoreductase activity, acting on CH-OH group of donors; F:flavin adenine dinucleotide binding; P:oxidation-reduction process	0	IPR000172 (PFAM); IPR007867 (PFAM); IPR023753 (G3DSA:3.50.50.GENE3D); IPR012132 (PIRSF); PTHR11552:SF135 (PANTHER); PTHR11552:SF135 (PANTHER); PTHR11552 (PANTHER); SSF54373 (SUPERFAMILY); IPR023753 (SUPERFAMILY)	NA	NA	458.767	11.3333	192.073	35.6667	51	41.8824
DR_013416-RA	CE10	alpha beta-hydrolase [Phialocephala scopiformis]	F:hydrolase activity	0	IPR002018 (PFAM); IPR029058 (G3DSA:3.40.50.GENE3D); PTHR11559 (PANTHER); PTHR11559:SF160 (PANTHER); IPR029058 (SUPERFAMILY)	NA	NA	NA	NA	NA	NA	20	10.2093
DR_013431-RA	AA9	glycoside hydrolase family 61	P:carbohydrate metabolic process; C:extracellular region; F:hydrolase activity, hydrolyzing O-glycosyl compounds; F:cellulose binding	0	IPR005103 (PFAM); PTHR33353 (PANTHER)	NA	NA	67.0906	2	4.7589	1.33333	2	3.05748
DR_013443-RA	AA7	FAD binding domain-containing [Phialocephala scopiformis]	F:oxidoreductase activity	0	IPR006094 (PFAM); IPR016169 (G3DSA:3.30.465.GENE3D); PTHR11748 (PANTHER); PTHR11748:SF100 (PANTHER); PTHR11748:SF100 (PANTHER); PTHR11748 (PANTHER); IPR016166 (PROSITE_PROFILES); IPR016166 (SUPERFAMILY)	NA	NA	NA	NA	NA	NA	NA	NA
DR_013471-RA	AA5	copper radical oxidase	0	0	IPR009880 (PFAM); IPR015916 (G3DSA:2.130.10.GENE3D); PTHR32208:SF9 (PANTHER); PTHR32208 (PANTHER); IPR011043 (SUPERFAMILY)	NA	NA	NA	NA	NA	NA	5.33333	2.35864
DR_013474-RA	CE10	hormone-sensitive lipase	P:metabolic process; C:integral component of membrane; F:hydrolase activity	0	IPR013094 (PFAM); IPR029058 (G3DSA:3.40.50.GENE3D); PTHR23025 (PANTHER); PTHR23025:SF3 (PANTHER); PTHR23025:SF3 (PANTHER); PTHR23025 (PANTHER); IPR029058 (SUPERFAMILY)	NA	NA	89.4163	2.66667	28.5346	5.33333	21.3333	14.8107
DR_013497-RA	CE10	alpha beta-hydrolase [Phialocephala scopiformis]	C:extracellular space; F:carboxylic ester hydrolase activity	EC:3.1.1.1	IPR029058 (G3DSA:3.40.50.GENE3D); IPR002018 (PFAM); PTHR11559:SF160 (PANTHER); PTHR11559 (PANTHER); IPR029058 (SUPERFAMILY)	NA	NA	44.765	1.33333	113.66	29	62.3333	48.5692
DR_013555-RA	AA1	multicopper oxidase	F:oxidoreductase activity	0	IPR008972 (G3DSA:2.60.40.GENE3D); IPR001117 (PFAM); PTHR11709:SF49 (PANTHER); PTHR11709 (PANTHER); IPR008972 (SUPERFAMILY)	NA	NA	NA	NA	NA	NA	11.6667	6.69541
DR_013559-RA	GT41	UDP-N-acetylglucosaminyltransferase [Marssonina brunnea multigermtubi MB_m1]	F:transferase activity, transferring glycosyl groups	0	IPR019734 (SMART); IPR011990 (G3DSA:1.25.40.GENE3D); IPR019734 (PFAM); IPR019734 (PFAM); PTHR23083:SF421 (PANTHER); PTHR23083:SF421 (PANTHER); PTHR23083 (PANTHER); PTHR23083 (PANTHER); IPR019734 (PROSITE_PROFILES); IPR013026 (PROSITE_PROFILES); IPR013026 (PROSITE_PROFILES); IPR019734 (PROSITE_PROFILES); IPR019734 (PROSITE_PROFILES); IPR011990 (SUPERFAMILY)	NA	NA	NA	NA	9.5178	2.66667	84	42.0924
DR_013569-RA	CE1	triacylglycerol lipase [Marssonina brunnea multigermtubi MB_m1]	P:lipid metabolic process; C:integral component of membrane; F:hydrolase activity	0	IPR000073 (PFAM); IPR029058 (G3DSA:3.40.50.GENE3D); PTHR11005:SF9 (PANTHER); PTHR11005 (PANTHER); IPR029058 (SUPERFAMILY)	NA	NA	NA	NA	3.59341	1	14.6667	11.897
DR_013577-RA	GH10	Glycoside superfamily [Penicillium expansum]	P:polysaccharide catabolic process; F:endo-1,4-beta-xylanase activity	EC:3.2.1.8	IPR001000 (PRINTS); IPR001000 (SMART); IPR013781 (G3DSA:3.20.20.GENE3D); IPR001000 (PFAM); PTHR31490 (PANTHER); IPR001000 (PROSITE_PROFILES); IPR017853 (SUPERFAMILY)	NA	NA	NA	NA	NA	NA	20.3333	17.2837
DR_013584-RA	GH131	hypothetical protein MBM_04331 [Marssonina brunnea f. sp. 'multigermtubi' MB_m1]	0	0	PTHR34612 (PANTHER)	98.203	0.666667	531.985	12.3333	174.852	33.3333	61.6667	64.0953
DR_013609-RA	GH5	exo-beta-1,3-glucanase [Marssonina brunnea multigermtubi MB_m1]	P:glucan catabolic process; C:fungal-type cell wall; C:barrier septum; P:cellular glucan metabolic process; P:fungal-type cell wall disassembly involved in conjugation with cellular fusion; C:integral component of membrane; C:plasma membrane of cell tip; F:beta-glucosidase activity; C:endoplasmic reticulum; C:extracellular region; C:cell surface; C:actin fusion focus	EC:3.2.1.21	IPR001547 (PFAM); IPR013781 (G3DSA:3.20.20.GENE3D); PTHR31297:SF1 (PANTHER); PTHR31297 (PANTHER); IPR017853 (SUPERFAMILY)	NA	NA	NA	NA	NA	NA	6	4.98911
DR_013611-RA	CE10	alpha beta-hydrolase [Phialocephala scopiformis]	P:metabolic process; F:hydrolase activity	0	IPR013094 (PFAM); IPR029058 (G3DSA:3.40.50.GENE3D); PTHR23024 (PANTHER); PTHR23024:SF47 (PANTHER); PTHR23024:SF47 (PANTHER); PTHR23024 (PANTHER); PTHR23024:SF47 (PANTHER); IPR029058 (SUPERFAMILY)	143.45	1	NA	NA	NA	NA	8.66667	5.6874
DR_013617-RA	GT4	alpha-1,2-mannosyltransferase alg-11 [Purpureocillium lilacinum]	C:endoplasmic reticulum membrane; P:oligosaccharide-lipid intermediate biosynthetic process; P:mannosylation; C:integral component of membrane; P:protein glycosylation; P:oligosaccharide biosynthetic process; F:alpha-1,2-mannosyltransferase activity	EC:2.4.1	G3DSA:3.40.50.2000 (GENE3D); IPR031814 (PFAM); IPR001296 (PFAM); PTHR12526 (PANTHER); PTHR12526:SF315 (PANTHER); PTHR12526:SF315 (PANTHER); PTHR12526 (PANTHER); SSF53756 (SUPERFAMILY)	201.569	2	NA	NA	22.5133	3.66667	17.3333	10.9918
DR_013629-RA	CE3	gdsl-like lipase acylhydrolase	C:membrane; C:integral component of membrane; F:hydrolase activity	0	IPR013830 (G3DSA:3.40.50.GENE3D); IPR013830 (PFAM); PTHR30383:SF4 (PANTHER); PTHR30383 (PANTHER); IPR013830 (SUPERFAMILY)	NA	NA	NA	NA	2.37945	0.666667	13.3333	11.3521
DR_013631-RA	GT8	glycosyl transferase family 8 [Marssonina brunnea multigermtubi MB_m1]	F:transferase activity, transferring glycosyl groups; C:membrane	0	IPR029044 (G3DSA:3.90.550.GENE3D); PTHR11183 (PANTHER); PTHR11183:SF42 (PANTHER); PTHR11183:SF42 (PANTHER); PTHR11183 (PANTHER); IPR029044 (SUPERFAMILY)	NA	NA	NA	NA	NA	NA	2	4.25668
DR_013635-RA	GT65	alternative oxidase	P:transmembrane transport; C:membrane; C:integral component of membrane	0	IPR019378 (PFAM)	NA	NA	NA	NA	NA	NA	NA	NA
DR_013677-RA	GH18	glycoside hydrolase family 18	F:chitinase activity; P:carbohydrate metabolic process; F:chitin binding; P:chitin catabolic process; C:extracellular region	EC:3.2.1.14	IPR013781 (G3DSA:3.20.20.GENE3D); IPR001223 (PFAM); PTHR11177 (PANTHER); PTHR11177:SF160 (PANTHER); IPR017853 (SUPERFAMILY)	NA	NA	NA	NA	44.8812	7.33333	47.3333	51.6407
DR_013687-RA	GH114	Endo alpha-1,4 polygalactosaminidase [Rasamsonia emersonii CBS ]	C:membrane; F:hydrolase activity	0	IPR004352 (PFAM); PTHR35273 (PANTHER); PTHR35273:SF1 (PANTHER); IPR017853 (SUPERFAMILY)	NA	NA	196.047	4.66667	171.598	32.3333	199.333	199.819
DR_013722-RA	AA11	hypothetical protein MBM_06927 [Marssonina brunnea f. sp. 'multigermtubi' MB_m1]	0	0	PTHR36182 (PANTHER); PTHR36182:SF2 (PANTHER)	NA	NA	NA	NA	NA	NA	12	12.529
DR_013735-RA	GT69	hypothetical protein BGHDH14_bgh05865	C:membrane; C:integral component of membrane	0	no IPS match	NA	NA	NA	NA	NA	NA	4.66667	4.26745
DR_013773-RA	GH47	class I alpha-mannosidase [Marssonina brunnea multigermtubi MB_m1]	F:calcium ion binding; P:metabolic process; C:integral component of membrane; F:mannosyl-oligosaccharide 1,2-alpha-mannosidase activity; C:intracellular	EC:3.2.1.113	IPR001382 (PRINTS); IPR001382 (PFAM); IPR001382 (G3DSA:1.50.10.GENE3D); PTHR11742 (PANTHER); PTHR11742:SF49 (PANTHER); IPR001382 (SUPERFAMILY)	NA	NA	NA	NA	2.37945	0.666667	18	15.9905
DR_013779-RA	GH76	glycoside hydrolase family 76	C:membrane; P:metabolic process; F:hydrolase activity, acting on glycosyl bonds	0	IPR012341 (G3DSA:1.50.10.GENE3D); IPR005198 (PFAM); PTHR12145:SF23 (PANTHER); PTHR12145 (PANTHER); IPR008928 (SUPERFAMILY)	NA	NA	NA	NA	NA	NA	NA	NA
DR_013784-RA	GH72	glycoside hydrolase family 72	P:fungal-type cell wall organization; C:fungal-type cell wall; P:fungal-type cell wall (1->3)-beta-D-glucan biosynthetic process; C:anchored component of external side of plasma membrane; F:1,3-beta-glucanosyltransferase activity; F:hydrolase activity, acting on glycosyl bonds	0	IPR004886 (PFAM); IPR013781 (G3DSA:3.20.20.GENE3D); PTHR31468:SF8 (PANTHER); PTHR31468 (PANTHER); PTHR31468 (PANTHER); PTHR31468:SF8 (PANTHER); IPR017853 (SUPERFAMILY)	NA	NA	NA	NA	NA	NA	NA	NA
DR_013792-RA	GH5	glycoside hydrolase family 5 [Phialocephala scopiformis]	P:mannan catabolic process; C:extracellular region; F:cellulose binding; F:mannan endo-1,4-beta-mannosidase activity	EC:3.2.1.78	IPR001547 (PFAM); IPR013781 (G3DSA:3.20.20.GENE3D); PTHR31451 (PANTHER); PTHR31451:SF11 (PANTHER); IPR017853 (SUPERFAMILY)	NA	NA	67.0149	2	10.6833	3	42.6667	33.6288
DR_013792-RA	CBM1	glycoside hydrolase family 5 [Phialocephala scopiformis]	P:mannan catabolic process; C:extracellular region; F:cellulose binding; F:mannan endo-1,4-beta-mannosidase activity	EC:3.2.1.78	IPR001547 (PFAM); IPR013781 (G3DSA:3.20.20.GENE3D); PTHR31451 (PANTHER); PTHR31451:SF11 (PANTHER); IPR017853 (SUPERFAMILY)	NA	NA	67.0149	2	10.6833	3	42.6667	33.6288
DR_013801-RA	CE1	alpha beta-Hydrolase [Glarea lozoyensis ATCC 20868]	F:hydrolase activity	0	IPR029058 (G3DSA:3.40.50.GENE3D); IPR029058 (SUPERFAMILY)	NA	NA	95.2023	1.66667	35.2665	4.66667	5.33333	5.23931
DR_013822-RA	CE4	chitin deacetylase [Marssonina brunnea multigermtubi MB_m1]	F:catalytic activity	0	IPR002509 (G3DSA:3.20.20.GENE3D); IPR002509 (PFAM); PTHR10587 (PANTHER); PTHR10587:SF92 (PANTHER); IPR002509 (PROSITE_PROFILES); IPR011330 (SUPERFAMILY)	NA	NA	NA	NA	NA	NA	NA	NA
DR_013846-RA	CBM63	carbohydrate-binding module family 63	P:defense response to fungus; P:defense response to bacterium	0	IPR009009 (G3DSA:2.40.40.GENE3D); IPR009009 (PFAM); PTHR31836 (PANTHER); PTHR31836:SF17 (PANTHER); IPR009009 (SUPERFAMILY)	NA	NA	NA	NA	NA	NA	30.6667	32.8394
DR_013880-RA	CE5	cutinase 3 [Phialophora attae]	F:hydrolase activity	0	no IPS match	NA	NA	NA	NA	NA	NA	NA	NA
DR_013889-RA	GH3	glycoside hydrolase family 3	P:glucan catabolic process; F:beta-glucosidase activity; C:plasma membrane	EC:3.2.1.21	IPR001764 (G3DSA:3.20.20.GENE3D); IPR017853 (SUPERFAMILY)	NA	NA	NA	NA	9.61475	2.66667	72	54.5618
DR_013904-RA	GT2	glycosyltransferase family 2	C:membrane; C:integral component of membrane; F:transferase activity	0	IPR029044 (G3DSA:3.90.550.GENE3D); IPR001173 (PFAM); PTHR35408:SF1 (PANTHER); PTHR35408 (PANTHER); PTHR35408:SF1 (PANTHER); PTHR35408 (PANTHER); IPR029044 (SUPERFAMILY)	NA	NA	NA	NA	NA	NA	NA	NA
DR_013933-RA	GT2	glycosyltransferase family 2 [Nectria haematococca mpVI 77-13-4]	C:integral component of membrane; F:transferase activity	0	PF13641 (PFAM); IPR029044 (G3DSA:3.90.550.GENE3D); PTHR10587:SF87 (PANTHER); PTHR10587 (PANTHER); IPR029044 (SUPERFAMILY)	NA	NA	NA	NA	NA	NA	6.66667	3.23164
DR_013951-RA	GT2	chitin synthase	P:chitin biosynthetic process; C:integral component of membrane; F:chitin synthase activity; C:chitosome; C:plasma membrane	EC:2.4.1.16	IPR004834 (PFAM); IPR004835 (PANTHER); PTHR22914:SF9 (PANTHER); IPR004834 (PRODOM); IPR029044 (SUPERFAMILY)	NA	NA	NA	NA	NA	NA	19.3333	16.2038
DR_013967-RA	GH17	glucan endo-1,3-beta-glucosidase eglC	P:carbohydrate metabolic process; F:transferase activity, transferring glycosyl groups; C:membrane; F:hydrolase activity, acting on glycosyl bonds	0	PTHR16631:SF13 (PANTHER); PTHR16631 (PANTHER)	NA	NA	NA	NA	NA	NA	NA	NA
