# Supplementary material for: A draft genome sequence of the rose black spot fungus Diplocarpon rosae reveals a high degree of genome duplication
Source: PLoS One. 2017 Oct 5;12(10):e0185310. doi: 10.1371/journal.pone.0185310 (PMC5628827; doi:10.1371/journal.pone.0185310)
Supplement: S8 File — (XLSX) [file pone.0185310.s008.xlsx]

## Sheet: BUSCO results Genome
#BUSCO_group	Status	Scaffold	Start	End	Bitscore	Length
BUSCOfEOG7SBP0G	Duplicated	DR_scaffold_0324	25080	35706	325.6	203
BUSCOfEOG783N4K	Duplicated	DR_scaffold_0242	31036	42965	1114.7	614
BUSCOfEOG7JHMDP	Complete	DR_scaffold_0168	76040	96830	2188.9	1514
BUSCOfEOG7HB5JW	Complete	DR_scaffold_0028	331417	342994	674.9	774
BUSCOfEOG7CCC0Z	Duplicated	DR_scaffold_0130	107583	119955	1117.9	956
BUSCOfEOG7HB5M4	Duplicated	DR_scaffold_0266	11463	22813	699.8	417
BUSCOfEOG7G1VFT	Duplicated	DR_scaffold_0015	183031	198457	1673.5	1499
BUSCOfEOG7J44JS	Duplicated	DR_scaffold_0042	163469	173888	292	265
BUSCOfEOG7TN012	Complete	DR_scaffold_0005	644380	661099	4314.8	2118
BUSCOfEOG7ZD249	Duplicated	DR_scaffold_0180	74984	86458	1038	494
BUSCOfEOG722JJ1	Duplicated	DR_scaffold_0006	117951	130267	826.2	703
BUSCOfEOG79GTGW	Duplicated	DR_scaffold_0172	106502	117844	702.8	687
BUSCOfEOG7SN8NV	Complete	DR_scaffold_0027	177070	188244	766.9	384
BUSCOfEOG71K6BB	Duplicated	DR_scaffold_0025	297720	310586	1355.9	1013
BUSCOfEOG79930D	Duplicated	DR_scaffold_0111	143555	154769	119.9	506
BUSCOfEOG7673KQ	Duplicated	DR_scaffold_0356	0	9736	803.6	547
BUSCOfEOG7CVQ7F	Duplicated	DR_scaffold_0131	111937	123406	1017.4	520
BUSCOfEOG7ZD25S	Duplicated	DR_scaffold_0006	495815	507011	644.2	389
BUSCOfEOG7WDNBS	Fragmented	DR_scaffold_0205	1647	12865	684.5	341
BUSCOfEOG7BZW2X	Duplicated	DR_scaffold_0084	29713	40930	682.5	387
BUSCOfEOG7HXD33	Duplicated	DR_scaffold_0091	115291	126467	598.6	308
BUSCOfEOG7Z69S1	Duplicated	DR_scaffold_0026	221931	232869	545.3	846
BUSCOfEOG715QCC	Duplicated	DR_scaffold_0200	39980	55265	2433.1	1705
BUSCOfEOG7QK0PZ	Duplicated	DR_scaffold_0173	34468	45251	247.5	216
BUSCOfEOG751NSQ	Duplicated	DR_scaffold_0110	85328	95751	218.9	176
BUSCOfEOG7CVQ7K	Complete	DR_scaffold_0069	166920	177823	469.1	334
BUSCOfEOG7R83BB	Duplicated	DR_scaffold_0014	487807	498853	618.5	343
BUSCOfEOG76X682	Duplicated	DR_scaffold_0011	309525	321531	832.4	608
BUSCOfEOG7KH9TM	Complete	DR_scaffold_0046	266262	286157	1317	582
BUSCOfEOG71GB67	Duplicated	DR_scaffold_0072	79058	95018	535	251
BUSCOfEOG73545F	Duplicated	DR_scaffold_0169	24210	36000	1197.5	672
BUSCOfEOG7NW6JR	Duplicated	DR_scaffold_0133	97399	108991	893	673
BUSCOfEOG7W15FV	Complete	DR_scaffold_0097	27123	38158	493.7	321
BUSCOfEOG7966R0	Duplicated	DR_scaffold_0013	156145	168185	1252.8	843
BUSCOfEOG75MW6X	Duplicated	DR_scaffold_0115	108700	119179	83.2	252
BUSCOfEOG7QZGNM	Duplicated	DR_scaffold_0033	195610	206250	543.5	341
BUSCOfEOG7Q8CWT	Duplicated	DR_scaffold_0174	101476	113388	1152.8	660
BUSCOfEOG7GBG5H	Duplicated	DR_scaffold_1137	0	6068	387.6	392
BUSCOfEOG75XGWD	Duplicated	DR_scaffold_0127	38287	49583	616.7	361
BUSCOfEOG7GXPKV	Duplicated	DR_scaffold_0090	51114	65839	1787.6	1355
BUSCOfEOG75TMNV	Duplicated	DR_scaffold_0017	464481	475762	536.1	472
BUSCOfEOG7XSTPB	Duplicated	DR_scaffold_0020	433848	445500	1203.2	803
BUSCOfEOG7J9W1K	Duplicated	DR_scaffold_0167	102250	113436	444.1	421
BUSCOfEOG7ZGXCD	Duplicated	DR_scaffold_0377	1111	12153	521.9	733
BUSCOfEOG7B05NR	Duplicated	DR_scaffold_0020	199796	213567	2141.4	1209
BUSCOfEOG7BP8F0	Duplicated	DR_scaffold_0004	109804	120163	315.9	272
BUSCOfEOG7W41QC	Duplicated	DR_scaffold_0013	397318	407995	352.3	210
BUSCOfEOG769ZXC	Duplicated	DR_scaffold_0117	128159	138695	156.5	179
BUSCOfEOG7Q5HQM	Duplicated	DR_scaffold_0068	149420	161197	500.2	413
BUSCOfEOG78SQVF	Duplicated	DR_scaffold_0161	23098	33678	371.8	284
BUSCOfEOG7Z3FDQ	Duplicated	DR_scaffold_0242	48922	59987	595.9	514
BUSCOfEOG7J70QG	Duplicated	DR_scaffold_0050	39056	50612	1044.1	574
BUSCOfEOG79KPPX	Duplicated	DR_scaffold_0054	297392	309407	556.5	602
BUSCOfEOG735483	Duplicated	DR_scaffold_0106	156671	167246	353.2	229
BUSCOfEOG7G1VGN	Duplicated	DR_scaffold_0027	350095	361789	1090.5	554
BUSCOfEOG7BZW2X	Duplicated	DR_scaffold_0151	70518	81739	693.7	387
BUSCOfEOG74FFC7	Duplicated	DR_scaffold_0136	17252	27903	290.1	272
BUSCOfEOG7GJ6PG	Duplicated	DR_scaffold_0109	96016	108045	857.8	570
BUSCOfEOG7D59X9	Complete	DR_scaffold_0022	158965	170632	224.5	609
BUSCOfEOG744TK7	Duplicated	DR_scaffold_0001	458728	470104	748.7	473
BUSCOfEOG7SJDFS	Duplicated	DR_scaffold_0074	188673	199895	442.7	348
BUSCOfEOG7VHT6T	Duplicated	DR_scaffold_0057	210263	221612	775.1	449
BUSCOfEOG7VX95T	Complete	DR_scaffold_0005	739817	751628	932.9	438
BUSCOfEOG7ZD251	Duplicated	DR_scaffold_0084	157266	168237	535.9	367
BUSCOfEOG708W9T	Duplicated	DR_scaffold_0012	415318	426168	471.3	281
BUSCOfEOG751NTH	Complete	DR_scaffold_0139	74665	85026	208.3	119
BUSCOfEOG793BHT	Duplicated	DR_scaffold_0229	10639	22181	900.9	650
BUSCOfEOG7ZSJ2V	Duplicated	DR_scaffold_0189	39900	51165	810.1	626
BUSCOfEOG7XSTQ5	Duplicated	DR_scaffold_0004	426883	437964	675.1	382
BUSCOfEOG7XH6ZR	Complete	DR_scaffold_0121	42888	55173	910	666
BUSCOfEOG7PZS9D	Complete	DR_scaffold_0127	137004	147261	247	143
BUSCOfEOG7GFBFJ	Duplicated	DR_scaffold_0006	194787	206381	667.6	474
BUSCOfEOG7P2Z2N	Duplicated	DR_scaffold_0006	286454	297500	499.6	438
BUSCOfEOG7PCJT9	Duplicated	DR_scaffold_0149	70075	81295	610.6	443
BUSCOfEOG7NKKX2	Duplicated	DR_scaffold_0124	67058	78305	587.3	560
BUSCOfEOG7TF7K9	Duplicated	DR_scaffold_0081	56294	68378	705.2	808
BUSCOfEOG7WDNDF	Complete	DR_scaffold_0054	204951	215748	332.6	237
BUSCOfEOG7WDNF7	Duplicated	DR_scaffold_0047	304062	314553	235	205
BUSCOfEOG783N3S	Duplicated	DR_scaffold_0066	66017	78974	1349.3	1059
BUSCOfEOG74TX7J	Duplicated	DR_scaffold_0180	76913	89384	1291.2	807
BUSCOfEOG70GMV4	Duplicated	DR_scaffold_0041	282243	292724	284.7	184
BUSCOfEOG715QCH	Duplicated	DR_scaffold_0017	424980	438591	1459.1	1081
BUSCOfEOG7KH9T3	Duplicated	DR_scaffold_0037	100354	113106	880	919
BUSCOfEOG7FNCKC	Duplicated	DR_scaffold_0168	23480	38530	1092	709
BUSCOfEOG747PVB	Duplicated	DR_scaffold_0068	20956	31285	373	321
BUSCOfEOG7HTHVM	Duplicated	DR_scaffold_0308	18375	28899	275.2	188
BUSCOfEOG7S2265	Duplicated	DR_scaffold_0088	79834	93677	1243	966
BUSCOfEOG7FJH8N	Duplicated	DR_scaffold_0172	25861	37468	742.5	648
BUSCOfEOG7C2RBK	Duplicated	DR_scaffold_0009	227841	238624	463	291
BUSCOfEOG7J44HQ	Duplicated	DR_scaffold_0021	95821	106739	440.4	324
BUSCOfEOG7R83CW	Duplicated	DR_scaffold_0078	126828	137553	426.5	273
BUSCOfEOG715QF5	Duplicated	DR_scaffold_0213	36985	48457	782.6	498
BUSCOfEOG7FJHC7	Duplicated	DR_scaffold_0038	63658	74137	364.6	280
BUSCOfEOG7PP5JH	Complete	DR_scaffold_0304	3001	13742	291.5	311
BUSCOfEOG7008JM	Duplicated	DR_scaffold_0219	32187	43110	616.5	433
BUSCOfEOG7BW0WH	Duplicated	DR_scaffold_0009	545191	556182	376.7	305
BUSCOfEOG7N9059	Duplicated	DR_scaffold_0056	157380	168690	926.5	566
BUSCOfEOG70GMQZ	Duplicated	DR_scaffold_0206	7493	19457	923	690
BUSCOfEOG747PSK	Duplicated	DR_scaffold_0130	100635	112456	821.1	622
BUSCOfEOG70PC6X	Duplicated	DR_scaffold_0032	359819	371389	670.3	445
BUSCOfEOG7TXKW3	Duplicated	DR_scaffold_0128	34092	44406	170.6	119
BUSCOfEOG757D5M	Complete	DR_scaffold_0160	54228	68300	1895.6	1320
BUSCOfEOG7X9GJ0	Fragmented	DR_scaffold_0240	25391	36074	191.5	143
BUSCOfEOG7WT4CT	Duplicated	DR_scaffold_0175	32284	42778	374.5	253
BUSCOfEOG744TJK	Duplicated	DR_scaffold_0007	283713	295722	735.8	782
BUSCOfEOG7FR7QW	Duplicated	DR_scaffold_0051	42294	53946	983.9	767
BUSCOfEOG7Z0K4S	Duplicated	DR_scaffold_0322	4948	17862	899.1	976
BUSCOfEOG7QVMCR	Duplicated	DR_scaffold_0032	19332	30287	259.6	281
BUSCOfEOG7ZGXCZ	Duplicated	DR_scaffold_0191	38317	49534	676.8	400
BUSCOfEOG7G4QRH	Duplicated	DR_scaffold_0093	85112	95954	458.5	332
BUSCOfEOG7GJ6QS	Duplicated	DR_scaffold_0045	178024	188717	501.5	252
BUSCOfEOG7MWH6S	Duplicated	DR_scaffold_0143	115182	126363	801.3	524
BUSCOfEOG7D59ZK	Duplicated	DR_scaffold_0004	211446	222267	431.8	315
BUSCOfEOG76X682	Duplicated	DR_scaffold_0001	834698	846719	827.6	608
BUSCOfEOG7MWH56	Duplicated	DR_scaffold_0084	23884	37478	1896.3	1037
BUSCOfEOG7K3V05	Duplicated	DR_scaffold_0091	36580	47229	290.6	203
BUSCOfEOG7T4MTT	Duplicated	DR_scaffold_0240	44812	57556	1350.2	1297
BUSCOfEOG7M0P4G	Duplicated	DR_scaffold_0218	22140	32690	281.3	207
BUSCOfEOG7WT4CC	Duplicated	DR_scaffold_0090	202337	212886	285.8	174
BUSCOfEOG7B320D	Duplicated	DR_scaffold_0066	207256	217831	244.5	195
BUSCOfEOG7Q5HQD	Complete	DR_scaffold_0115	19237	30459	640.7	331
BUSCOfEOG7DNP5M	Duplicated	DR_scaffold_0057	17597	28346	390.8	297
BUSCOfEOG7H1JXQ	Duplicated	DR_scaffold_0053	0	8157	354.8	339
BUSCOfEOG7ZD27J	Duplicated	DR_scaffold_0026	137118	147601	235.4	134
BUSCOfEOG7VQJQS	Duplicated	DR_scaffold_0149	75691	86640	602.7	479
BUSCOfEOG7QRR76	Duplicated	DR_scaffold_0012	429930	440635	302.8	184
BUSCOfEOG75XGWC	Complete	DR_scaffold_0096	115051	126106	732.6	423
BUSCOfEOG7WHHNH	Duplicated	DR_scaffold_0096	150289	160931	406.7	202
BUSCOfEOG7MWH5Z	Duplicated	DR_scaffold_0152	75858	87446	980.8	587
BUSCOfEOG71ZPBX	Duplicated	DR_scaffold_0138	66789	77697	540.6	326
BUSCOfEOG78SQWR	Duplicated	DR_scaffold_0025	354162	365853	1068.4	690
BUSCOfEOG7Q8CZB	Duplicated	DR_scaffold_0116	4422	17001	483.2	351
BUSCOfEOG73545F	Duplicated	DR_scaffold_0119	166344	178137	1202.6	677
BUSCOfEOG7WT4D3	Duplicated	DR_scaffold_0261	24160	34408	190.1	128
BUSCOfEOG7MPRRK	Duplicated	DR_scaffold_0120	63191	73951	517.6	338
BUSCOfEOG7P5TBB	Duplicated	DR_scaffold_0078	80655	92242	635.2	536
BUSCOfEOG7G1VFT	Duplicated	DR_scaffold_0197	4374	19562	1393.3	1250
BUSCOfEOG7CNZTF	Duplicated	DR_scaffold_0014	487021	497476	270.1	186
BUSCOfEOG7GFBDZ	Duplicated	DR_scaffold_0030	378936	396723	769.1	543
BUSCOfEOG7JT75V	Duplicated	DR_scaffold_0006	325497	336740	611.2	360
BUSCOfEOG7G1VGN	Duplicated	DR_scaffold_0075	95713	107389	1088.6	554
BUSCOfEOG7DFXQ2	Duplicated	DR_scaffold_0034	165856	176771	732	348
BUSCOfEOG70PC6J	Duplicated	DR_scaffold_0011	217543	234189	968.6	621
BUSCOfEOG7BGHVG	Duplicated	DR_scaffold_0098	3986	16106	1462.9	1048
BUSCOfEOG74R21N	Duplicated	DR_scaffold_0113	76358	87470	644.9	370
BUSCOfEOG70ZZXC	Duplicated	DR_scaffold_0068	99158	110567	588	533
BUSCOfEOG75J0XC	Duplicated	DR_scaffold_0146	49628	61011	821.3	444
BUSCOfEOG7JHMH0	Duplicated	DR_scaffold_0138	55072	66990	375.4	442
BUSCOfEOG7MSN0V	Duplicated	DR_scaffold_0002	551381	562549	512.9	344
BUSCOfEOG7Z0K74	Duplicated	DR_scaffold_0138	95243	106124	422.5	269
BUSCOfEOG7VTDXX	Duplicated	DR_scaffold_0093	158109	169037	664.3	351
BUSCOfEOG77WWN5	Duplicated	DR_scaffold_0017	352853	364425	928.5	580
BUSCOfEOG7XH70W	Duplicated	DR_scaffold_0129	62936	74855	1265	694
BUSCOfEOG73Z358	Fragmented	DR_scaffold_0289	22892	33645	302.4	136
BUSCOfEOG7HB5JX	Complete	DR_scaffold_0156	110362	121627	697.8	603
BUSCOfEOG7BW0VK	Duplicated	DR_scaffold_0003	607760	619328	637.8	322
BUSCOfEOG7W15CW	Duplicated	DR_scaffold_0127	20515	31913	966.8	524
BUSCOfEOG7QC871	Duplicated	DR_scaffold_0186	31520	42509	691.7	464
BUSCOfEOG7BW0T0	Duplicated	DR_scaffold_0039	277105	291041	1959.5	1184
BUSCOfEOG78PVJ7	Duplicated	DR_scaffold_0054	285212	298848	1570.2	1336
BUSCOfEOG74N5S9	Duplicated	DR_scaffold_0092	37768	49290	353.1	364
BUSCOfEOG7G4QPG	Duplicated	DR_scaffold_0195	26435	38588	1263.2	804
BUSCOfEOG79W9DR	Duplicated	DR_scaffold_0058	174872	186806	665	650
BUSCOfEOG7PS1S5	Duplicated	DR_scaffold_0121	140092	150800	316.2	261
BUSCOfEOG74TX7J	Duplicated	DR_scaffold_0177	30809	43791	306.7	846
BUSCOfEOG7FJHC6	Duplicated	DR_scaffold_0063	76721	87245	354.1	245
BUSCOfEOG7XH70W	Duplicated	DR_scaffold_0023	260930	272849	1292.8	723
BUSCOfEOG7NPG2S	Duplicated	DR_scaffold_0004	323452	337278	1778.7	1244
BUSCOfEOG7KWSVP	Duplicated	DR_scaffold_0033	381030	391536	286.9	213
BUSCOfEOG72VHFB	Duplicated	DR_scaffold_0404	4815	18399	1933.2	1205
BUSCOfEOG7KM654	Complete	DR_scaffold_0115	128775	139704	429.5	272
BUSCOfEOG7CG78C	Duplicated	DR_scaffold_0149	107441	118484	475.5	351
BUSCOfEOG725DV9	Duplicated	DR_scaffold_0057	263401	274099	319.9	257
BUSCOfEOG7D864S	Duplicated	DR_scaffold_0042	271332	285343	2158.3	1378
BUSCOfEOG7SJDDG	Complete	DR_scaffold_0160	81540	97569	1041.8	584
BUSCOfEOG7QVMC1	Duplicated	DR_scaffold_0101	34638	49255	741.6	436
BUSCOfEOG7TN05B	Duplicated	DR_scaffold_0181	50183	60368	203.5	180
BUSCOfEOG7XM38T	Duplicated	DR_scaffold_0068	135374	146009	281	199
BUSCOfEOG7WQ81K	Duplicated	DR_scaffold_0003	699273	713422	707.7	987
BUSCOfEOG7B05RP	Complete	DR_scaffold_0099	83168	93737	445.4	300
BUSCOfEOG706124	Duplicated	DR_scaffold_0060	179401	190851	736.2	435
BUSCOfEOG7NGQQW	Complete	DR_scaffold_0216	6515	16814	243.3	152
BUSCOfEOG7966TJ	Complete	DR_scaffold_0072	8443	18877	326.3	231
BUSCOfEOG7T4MTT	Duplicated	DR_scaffold_0059	47972	60716	1341.4	1251
BUSCOfEOG793BHN	Duplicated	DR_scaffold_0077	89935	101435	648.7	497
BUSCOfEOG7MKWG6	Duplicated	DR_scaffold_0159	63981	75667	1144.7	680
BUSCOfEOG7P02TJ	Duplicated	DR_scaffold_0006	67321	79859	1271.5	894
BUSCOfEOG754J1M	Duplicated	DR_scaffold_0141	59175	69920	363.6	224
BUSCOfEOG7P2Z2M	Duplicated	DR_scaffold_0179	42094	53550	397.8	384
BUSCOfEOG7J70QK	Duplicated	DR_scaffold_0249	19374	31019	810	558
BUSCOfEOG7380DT	Fragmented	DR_scaffold_0042	115564	126538	632.4	322
BUSCOfEOG7BS4M9	Duplicated	DR_scaffold_0112	49907	60932	458.5	342
BUSCOfEOG7NKKXH	Duplicated	DR_scaffold_0142	67061	77528	197	188
BUSCOfEOG75B8GB	Complete	DR_scaffold_0046	175106	201543	905.4	645
BUSCOfEOG7KQ28X	Duplicated	DR_scaffold_0132	149032	163675	2600.3	1557
BUSCOfEOG7CNZQ6	Complete	DR_scaffold_0001	575434	588421	1369.7	941
BUSCOfEOG72ZCQF	Duplicated	DR_scaffold_0016	84879	96452	749.8	493
BUSCOfEOG7WDNC5	Duplicated	DR_scaffold_0055	173815	185338	1262.3	728
BUSCOfEOG773XSW	Duplicated	DR_scaffold_0220	37060	47698	408.5	421
BUSCOfEOG7F7WMJ	Fragmented	DR_scaffold_0031	7561	20800	1024.2	826
BUSCOfEOG77WWN8	Duplicated	DR_scaffold_0012	228184	240955	1676.9	983
BUSCOfEOG79SF6H	Duplicated	DR_scaffold_0035	6110	16385	417.7	575
BUSCOfEOG7WDNCV	Duplicated	DR_scaffold_0136	86144	97487	833.8	540
BUSCOfEOG7DVDQ1	Duplicated	DR_scaffold_0058	43729	54499	352.6	267
BUSCOfEOG70S7FW	Duplicated	DR_scaffold_0001	761926	772783	471.9	372
BUSCOfEOG7TTQKB	Duplicated	DR_scaffold_0016	408741	419757	571.5	258
BUSCOfEOG76X68V	Complete	DR_scaffold_0005	699580	710425	475.8	331
BUSCOfEOG7TXKSN	Duplicated	DR_scaffold_0056	9909	21881	828.3	701
BUSCOfEOG72G1GS	Duplicated	DR_scaffold_0037	7522	18838	900.8	452
BUSCOfEOG7MD4ZK	Complete	DR_scaffold_0005	429267	441029	1102.6	691
BUSCOfEOG7966R8	Duplicated	DR_scaffold_0058	225102	236818	845.5	517
BUSCOfEOG7SN8R7	Fragmented	DR_scaffold_0121	98228	156496	350.2	466
BUSCOfEOG7CNZTF	Duplicated	DR_scaffold_0008	361244	371699	264.3	186
BUSCOfEOG74J9HK	Duplicated	DR_scaffold_0331	15156	26322	673.4	578
BUSCOfEOG7Q8CX4	Complete	DR_scaffold_0009	104244	116316	1112.1	550
BUSCOfEOG7M3JBN	Duplicated	DR_scaffold_0002	258883	274946	631.2	761
BUSCOfEOG73JM5X	Duplicated	DR_scaffold_0068	6442	17221	365.9	320
BUSCOfEOG70W3NS	Duplicated	DR_scaffold_0043	59958	74288	2139	1346
BUSCOfEOG73BVPK	Duplicated	DR_scaffold_0010	436514	447763	427	293
BUSCOfEOG7T7H2J	Duplicated	DR_scaffold_0001	768014	779651	311.3	579
BUSCOfEOG7SBNZS	Duplicated	DR_scaffold_0057	157939	169015	593.8	370
BUSCOfEOG77HDS9	Duplicated	DR_scaffold_0064	107618	118325	380.2	234
BUSCOfEOG7Z95XD	Duplicated	DR_scaffold_0146	59405	70821	739.7	498
BUSCOfEOG7WDNG0	Duplicated	DR_scaffold_0072	47945	58343	186.1	124
BUSCOfEOG7HHX51	Duplicated	DR_scaffold_0140	65417	76030	339.1	181
BUSCOfEOG7RZ5ZF	Duplicated	DR_scaffold_0102	150712	162288	740.7	541
BUSCOfEOG7NSBC8	Duplicated	DR_scaffold_0008	131597	143016	672.9	371
BUSCOfEOG7B8SF4	Duplicated	DR_scaffold_0045	52481	63392	364.4	254
BUSCOfEOG7TXKSN	Duplicated	DR_scaffold_0093	29190	41283	972.6	862
BUSCOfEOG7BCNM6	Duplicated	DR_scaffold_0055	21920	34503	1503	859
BUSCOfEOG7DJSZ0	Duplicated	DR_scaffold_0090	31419	42075	338.5	224
BUSCOfEOG7SXWFH	Duplicated	DR_scaffold_0253	44157	56001	561.3	529
BUSCOfEOG7WQ84Z	Duplicated	DR_scaffold_0013	173419	186363	774.2	672
BUSCOfEOG7BGHWR	Duplicated	DR_scaffold_0013	377856	388892	586	375
BUSCOfEOG783N6S	Duplicated	DR_scaffold_0020	32044	42710	398.1	278
BUSCOfEOG70PC63	Duplicated	DR_scaffold_0056	277693	290629	1296.8	897
BUSCOfEOG7NPG2G	Duplicated	DR_scaffold_0027	231641	248062	2491.7	2068
BUSCOfEOG73FQZ2	Duplicated	DR_scaffold_0033	278896	289658	358.4	262
BUSCOfEOG71GB3B	Duplicated	DR_scaffold_0019	228176	268552	877.2	849
BUSCOfEOG78SQSW	Duplicated	DR_scaffold_0221	28220	39613	987.8	579
BUSCOfEOG7JMGRX	Duplicated	DR_scaffold_0143	21631	32582	408.1	271
BUSCOfEOG7W41NN	Duplicated	DR_scaffold_0141	60212	70905	399.8	306
BUSCOfEOG7B8SGP	Duplicated	DR_scaffold_0048	198151	208612	174.7	219
BUSCOfEOG79GTGF	Complete	DR_scaffold_0009	29766	41482	998.1	551
BUSCOfEOG7V1G2H	Duplicated	DR_scaffold_0119	123703	134547	306.9	230
BUSCOfEOG73RBPK	Duplicated	DR_scaffold_0156	73645	84371	576.3	316
BUSCOfEOG7VQJQS	Duplicated	DR_scaffold_0122	153000	163997	605	474
BUSCOfEOG7HTHTK	Duplicated	DR_scaffold_0034	179381	190895	628.2	481
BUSCOfEOG780RXX	Duplicated	DR_scaffold_0058	210323	221340	395.5	282
BUSCOfEOG73545B	Complete	DR_scaffold_0013	497674	509548	802.1	786
BUSCOfEOG79W9FD	Duplicated	DR_scaffold_0128	92859	104641	1051.2	537
BUSCOfEOG71ZPBN	Duplicated	DR_scaffold_0169	29885	40692	461.9	291
BUSCOfEOG7Q8CZB	Duplicated	DR_scaffold_0056	206741	219129	462.3	289
BUSCOfEOG7BCNMN	Duplicated	DR_scaffold_0200	37764	49029	927.1	877
BUSCOfEOG783N61	Duplicated	DR_scaffold_0045	100253	111151	408.5	292
BUSCOfEOG7V76G6	Duplicated	DR_scaffold_0078	89480	101334	1033.2	799
BUSCOfEOG7RV9TT	Duplicated	DR_scaffold_0059	244533	254937	288.4	363
BUSCOfEOG7Z95WZ	Duplicated	DR_scaffold_0153	47850	59091	663	350
BUSCOfEOG7FR7R3	Duplicated	DR_scaffold_0004	68150	81140	1765.8	1021
BUSCOfEOG71GB4R	Duplicated	DR_scaffold_0120	97722	109905	1024.4	742
BUSCOfEOG7H4F3W	Complete	DR_scaffold_0044	314287	325750	829.1	477
BUSCOfEOG7MKWHH	Duplicated	DR_scaffold_0349	9681	21245	823	716
BUSCOfEOG783N3Z	Duplicated	DR_scaffold_0054	134300	149263	815.9	616
BUSCOfEOG7Q8CZ6	Duplicated	DR_scaffold_0099	166993	178039	698.1	353
BUSCOfEOG7TJ3S6	Duplicated	DR_scaffold_0001	483333	497103	1712.4	1141
BUSCOfEOG73NGD9	Duplicated	DR_scaffold_0032	327759	346371	611.6	367
BUSCOfEOG76TB4Q	Duplicated	DR_scaffold_0210	54200	64479	201.2	158
BUSCOfEOG75B8DM	Duplicated	DR_scaffold_0002	193983	207555	1721	1180
BUSCOfEOG7Q8D07	Duplicated	DR_scaffold_0101	6102	16623	287.5	239
BUSCOfEOG7RBZK3	Duplicated	DR_scaffold_0242	34766	45563	532.6	393
BUSCOfEOG78SQVJ	Duplicated	DR_scaffold_0077	69733	80631	516.2	360
BUSCOfEOG7JDR6J	Duplicated	DR_scaffold_0001	930098	940598	540.4	645
BUSCOfEOG73NGGZ	Duplicated	DR_scaffold_0095	42431	52650	172.6	112
BUSCOfEOG7KSXMF	Complete	DR_scaffold_0083	228282	239231	460.8	222
BUSCOfEOG7FBRWF	Duplicated	DR_scaffold_0001	579715	590107	283.9	237
BUSCOfEOG7ZD23R	Duplicated	DR_scaffold_0006	129634	142026	1371.4	869
BUSCOfEOG70GMQZ	Duplicated	DR_scaffold_0358	0	10819	911.2	690
BUSCOfEOG77WWNJ	Duplicated	DR_scaffold_0033	64651	75992	718	726
BUSCOfEOG7V1G10	Duplicated	DR_scaffold_0003	264484	275841	865.4	487
BUSCOfEOG71GB4M	Duplicated	DR_scaffold_0010	349909	360940	520.4	399
BUSCOfEOG75QRC9	Duplicated	DR_scaffold_0072	222235	237727	2530.7	1930
BUSCOfEOG757D71	Duplicated	DR_scaffold_0029	407548	418270	388.6	254
BUSCOfEOG7H79BK	Duplicated	DR_scaffold_0187	38362	50126	1083.6	538
BUSCOfEOG71ZPBN	Duplicated	DR_scaffold_0119	161529	172339	451.7	291
BUSCOfEOG78PVMF	Complete	DR_scaffold_0050	42151	53074	445.6	267
BUSCOfEOG7TN05B	Duplicated	DR_scaffold_0291	20232	30324	218.1	196
BUSCOfEOG7WX0KP	Duplicated	DR_scaffold_0089	109510	120403	508.4	494
BUSCOfEOG7MPRQ9	Duplicated	DR_scaffold_0021	231466	244958	612.8	422
BUSCOfEOG7QC880	Duplicated	DR_scaffold_0115	0	6035	480.5	340
BUSCOfEOG75MW7P	Duplicated	DR_scaffold_0085	97000	107632	292.1	275
BUSCOfEOG7Z3FG9	Duplicated	DR_scaffold_0191	72694	83668	501.9	282
BUSCOfEOG7XDBRV	Duplicated	DR_scaffold_0205	61323	72351	632	336
BUSCOfEOG73NGCS	Duplicated	DR_scaffold_0052	165459	176808	522.4	432
BUSCOfEOG7N0CDV	Complete	DR_scaffold_0102	7816	19627	1026.4	547
BUSCOfEOG7P2Z26	Duplicated	DR_scaffold_0001	89728	114838	803.6	466
BUSCOfEOG7MWH92	Duplicated	DR_scaffold_0118	58338	68791	249.9	165
BUSCOfEOG79930D	Duplicated	DR_scaffold_0361	11667	23335	1159.6	608
BUSCOfEOG72892M	Duplicated	DR_scaffold_0001	666401	677673	645.6	482
BUSCOfEOG76DV5T	Duplicated	DR_scaffold_0019	169708	179968	128.8	92
BUSCOfEOG7B320D	Duplicated	DR_scaffold_0017	99345	109919	251.6	212
BUSCOfEOG77HDQH	Duplicated	DR_scaffold_0028	126495	137438	636.8	339
BUSCOfEOG7SFJ6P	Duplicated	DR_scaffold_0279	11557	22495	485.1	313
BUSCOfEOG76QFVQ	Duplicated	DR_scaffold_0055	204534	215052	381.1	292
BUSCOfEOG7FJHC7	Duplicated	DR_scaffold_0178	34128	44598	259.2	191
BUSCOfEOG76HQDT	Duplicated	DR_scaffold_0003	713715	724302	220.6	132
BUSCOfEOG7RFTT2	Duplicated	DR_scaffold_0051	215656	228331	904.1	690
BUSCOfEOG7XSTR7	Duplicated	DR_scaffold_0171	0	11622	577.9	457
BUSCOfEOG757D5X	Duplicated	DR_scaffold_0027	260426	282433	731.1	718
BUSCOfEOG77WWMR	Duplicated	DR_scaffold_0116	15122	25652	475.9	477
BUSCOfEOG74N5RB	Duplicated	DR_scaffold_0091	169366	180756	1036.8	717
BUSCOfEOG7Z3FDD	Duplicated	DR_scaffold_0295	6665	18396	1006.2	494
BUSCOfEOG783N3N	Duplicated	DR_scaffold_0048	301836	316026	1562.5	1431
BUSCOfEOG773XQR	Duplicated	DR_scaffold_0082	78153	90322	1173.3	661
BUSCOfEOG72NS19	Duplicated	DR_scaffold_0138	76314	87050	478.1	325
BUSCOfEOG7QC87H	Duplicated	DR_scaffold_0146	14425	25183	353.7	199
BUSCOfEOG790G80	Duplicated	DR_scaffold_0088	31336	47629	3825.6	2200
BUSCOfEOG7W6WV5	Duplicated	DR_scaffold_0086	44494	56963	1139.2	895
BUSCOfEOG78SQSZ	Duplicated	DR_scaffold_0035	175576	187460	882.3	636
BUSCOfEOG7N0CHT	Duplicated	DR_scaffold_0011	28633	39033	260.6	146
BUSCOfEOG71VT28	Duplicated	DR_scaffold_0008	27634	39870	843.7	754
BUSCOfEOG7N906G	Duplicated	DR_scaffold_0052	202875	213661	358.2	239
BUSCOfEOG7RV9S0	Duplicated	DR_scaffold_0057	57195	68101	662.1	335
BUSCOfEOG793BK3	Duplicated	DR_scaffold_0021	54811	65591	344.1	281
BUSCOfEOG7XSTQC	Duplicated	DR_scaffold_0028	242036	253574	643.4	442
BUSCOfEOG7WX0MV	Complete	DR_scaffold_0123	122019	132796	208.5	163
BUSCOfEOG7SN8NW	Duplicated	DR_scaffold_0252	51986	63595	713.2	527
BUSCOfEOG72C5C8	Duplicated	DR_scaffold_0185	31948	42581	315.4	229
BUSCOfEOG79W9GP	Duplicated	DR_scaffold_0144	3008	13918	424	246
BUSCOfEOG72NRZG	Duplicated	DR_scaffold_0127	28795	41518	1359.1	996
BUSCOfEOG77DJGT	Duplicated	DR_scaffold_0069	99741	110979	664.5	405
BUSCOfEOG72G1H6	Duplicated	DR_scaffold_0047	3350	29187	1102.8	880
BUSCOfEOG77Q55C	Duplicated	DR_scaffold_0200	53504	65064	636.5	719
BUSCOfEOG75XGVQ	Duplicated	DR_scaffold_0278	41615	54347	1403.5	903
BUSCOfEOG7CG77P	Complete	DR_scaffold_0005	355386	399773	949.8	732
BUSCOfEOG7RV9S3	Duplicated	DR_scaffold_0037	5406	16467	578.6	353
BUSCOfEOG7N63VZ	Duplicated	DR_scaffold_0136	93253	107344	1345.1	1341
BUSCOfEOG79GTHH	Duplicated	DR_scaffold_0194	63710	75337	672	615
BUSCOfEOG7J188V	Duplicated	DR_scaffold_0074	201441	211731	194.3	186
BUSCOfEOG78SQSZ	Duplicated	DR_scaffold_0004	56480	68372	927.2	687
BUSCOfEOG7GXPNJ	Duplicated	DR_scaffold_0074	25059	36111	506.7	352
BUSCOfEOG7ZKSMC	Duplicated	DR_scaffold_0281	40750	52379	1006	496
BUSCOfEOG7673NV	Complete	DR_scaffold_0033	355835	366332	299.8	193
BUSCOfEOG7XDBRM	Duplicated	DR_scaffold_0137	43213	54283	665.7	358
BUSCOfEOG7M3J7N	Duplicated	DR_scaffold_0012	236475	249847	1301.8	1051
BUSCOfEOG72G1GK	Duplicated	DR_scaffold_0060	262663	275019	1367.2	756
BUSCOfEOG7HQNM6	Duplicated	DR_scaffold_0025	394819	405400	466	425
BUSCOfEOG7M98QZ	Duplicated	DR_scaffold_0055	125300	148095	1497.5	659
BUSCOfEOG74BK2S	Complete	DR_scaffold_0077	220759	231799	644.5	349
BUSCOfEOG76DV5T	Duplicated	DR_scaffold_0079	124036	134221	128	93
BUSCOfEOG7JHMH7	Complete	DR_scaffold_0005	46171	56420	233.7	241
BUSCOfEOG7SV14M	Duplicated	DR_scaffold_0002	654707	670007	1190.9	651
BUSCOfEOG71RXXP	Duplicated	DR_scaffold_0026	360714	370890	138.7	119
BUSCOfEOG7HTHSD	Duplicated	DR_scaffold_0041	257167	268397	500.6	432
BUSCOfEOG77WWMQ	Duplicated	DR_scaffold_0050	75944	90716	2313	1663
BUSCOfEOG7JDR96	Duplicated	DR_scaffold_0137	0	7979	421.7	249
BUSCOfEOG7PK97G	Duplicated	DR_scaffold_0150	50710	63507	1219.2	953
BUSCOfEOG783N61	Duplicated	DR_scaffold_0060	62493	73387	420.2	307
BUSCOfEOG7KM62S	Complete	DR_scaffold_0003	646716	658089	761.1	469
BUSCOfEOG7NGQKW	Duplicated	DR_scaffold_0080	221248	235600	1940	1590
BUSCOfEOG7NSBB4	Fragmented	DR_scaffold_0056	101589	114759	378.5	421
BUSCOfEOG7GTTG0	Duplicated	DR_scaffold_0090	36624	47277	359.1	254
BUSCOfEOG7DZ8XP	Duplicated	DR_scaffold_0061	215029	225214	190.5	179
BUSCOfEOG7KQ2CS	Complete	DR_scaffold_0082	124610	135193	187.3	127
BUSCOfEOG7NSB9S	Duplicated	DR_scaffold_0089	63315	78371	1149.8	1383
BUSCOfEOG7KWSVP	Duplicated	DR_scaffold_0017	441476	451982	285.9	209
BUSCOfEOG7TTQMZ	Duplicated	DR_scaffold_0078	157825	168280	82.3	153
BUSCOfEOG77WWNJ	Duplicated	DR_scaffold_0175	33435	44776	715	724
BUSCOfEOG7P02VP	Duplicated	DR_scaffold_0165	61248	72045	456.1	301
BUSCOfEOG7XWPZ7	Duplicated	DR_scaffold_0029	272087	284184	862.3	568
BUSCOfEOG73RBMM	Duplicated	DR_scaffold_0271	28534	39925	981.6	565
BUSCOfEOG7PCJRS	Duplicated	DR_scaffold_0023	275618	287585	939.2	823
BUSCOfEOG74N5RB	Duplicated	DR_scaffold_0007	526596	537990	1035.9	707
BUSCOfEOG7B05NZ	Duplicated	DR_scaffold_0045	57063	68882	880.7	507
BUSCOfEOG73Z34Z	Duplicated	DR_scaffold_0038	160390	170911	349.4	246
BUSCOfEOG7MPRR4	Duplicated	DR_scaffold_0215	16606	27151	438.7	310
BUSCOfEOG7SFJ8S	Duplicated	DR_scaffold_0029	136118	147340	425.9	314
BUSCOfEOG7RFTTM	Duplicated	DR_scaffold_0003	737488	748831	647.2	485
BUSCOfEOG7TF7JJ	Duplicated	DR_scaffold_0013	508390	520338	1186	649
BUSCOfEOG7MKWFF	Complete	DR_scaffold_0060	93839	106092	1065.5	802
BUSCOfEOG72C57X	Duplicated	DR_scaffold_0012	75950	94664	596.8	869
BUSCOfEOG7GJ6PB	Duplicated	DR_scaffold_0040	176728	188071	596.2	423
BUSCOfEOG76QFST	Duplicated	DR_scaffold_0004	397791	409300	574.4	389
BUSCOfEOG7N905X	Duplicated	DR_scaffold_0173	66524	77459	374.4	313
BUSCOfEOG7BGHV7	Duplicated	DR_scaffold_0281	0	12249	1465.1	759
BUSCOfEOG73NGF6	Complete	DR_scaffold_0057	266364	277339	451.8	256
BUSCOfEOG7CRTZ8	Duplicated	DR_scaffold_0145	55752	67918	1410.3	1696
BUSCOfEOG79KPS5	Complete	DR_scaffold_0097	197419	208220	369.1	288
BUSCOfEOG70PC6J	Duplicated	DR_scaffold_0001	926912	943565	957.6	571
BUSCOfEOG7966SK	Duplicated	DR_scaffold_0010	549873	561006	664.8	450
BUSCOfEOG7NSB9K	Duplicated	DR_scaffold_0120	77239	94002	2940.4	2577
BUSCOfEOG73V6VZ	Duplicated	DR_scaffold_0105	132228	143408	687.7	471
BUSCOfEOG7673K1	Duplicated	DR_scaffold_0031	52382	65998	1781.4	1289
BUSCOfEOG7DJSXH	Complete	DR_scaffold_0005	16427	26968	413.3	307
BUSCOfEOG7PGF01	Duplicated	DR_scaffold_0060	22864	35209	1442.3	1204
BUSCOfEOG7F7WMJ	Fragmented	DR_scaffold_0124	127925	141175	1002.2	813
BUSCOfEOG7ZD25S	Duplicated	DR_scaffold_0028	166128	177321	646.7	391
BUSCOfEOG71P2KR	Duplicated	DR_scaffold_0180	41217	93053	1018.4	652
BUSCOfEOG74TX7R	Duplicated	DR_scaffold_0282	16571	27720	262.3	573
BUSCOfEOG7ZGXCD	Duplicated	DR_scaffold_0116	173738	184573	523.8	753
BUSCOfEOG7QRR44	Duplicated	DR_scaffold_0123	145006	156262	776.8	443
BUSCOfEOG79W9HQ	Duplicated	DR_scaffold_0004	163735	174158	280.5	175
BUSCOfEOG7J70TZ	Duplicated	DR_scaffold_0069	108116	118343	178.9	136
BUSCOfEOG7K3TW0	Duplicated	DR_scaffold_0017	293737	304801	610	468
BUSCOfEOG7WDNBS	Fragmented	DR_scaffold_0032	366962	378180	719.7	377
BUSCOfEOG74FFB1	Complete	DR_scaffold_0002	752406	763024	399.8	356
BUSCOfEOG7WDNG0	Duplicated	DR_scaffold_0047	152481	162879	186.6	124
BUSCOfEOG7S7SSS	Duplicated	DR_scaffold_0001	54599	64953	272.6	165
BUSCOfEOG7MWH55	Duplicated	DR_scaffold_0118	4028	17232	1579.7	1378
BUSCOfEOG70CRG6	Duplicated	DR_scaffold_0144	101128	112822	1226.8	975
BUSCOfEOG7NPG3Q	Duplicated	DR_scaffold_0101	34722	49282	816.7	383
BUSCOfEOG715QCH	Duplicated	DR_scaffold_0062	269912	283070	1366.9	1001
BUSCOfEOG7CVQ76	Duplicated	DR_scaffold_0009	403871	414983	492.2	301
BUSCOfEOG7T1RKH	Duplicated	DR_scaffold_0030	142452	156250	1628.6	1512
BUSCOfEOG7QNVVM	Duplicated	DR_scaffold_0124	50288	62090	1146.9	633
BUSCOfEOG7S7SR3	Complete	DR_scaffold_0013	318319	329287	647.1	290
BUSCOfEOG7HTHRJ	Duplicated	DR_scaffold_0028	296732	309191	900.4	741
BUSCOfEOG789CPC	Duplicated	DR_scaffold_0076	25027	35858	422.5	263
BUSCOfEOG70GMV4	Duplicated	DR_scaffold_0230	54023	64501	286	184
BUSCOfEOG71K6FB	Duplicated	DR_scaffold_0001	258820	269379	331.8	306
BUSCOfEOG7PCJR9	Duplicated	DR_scaffold_0144	89209	102463	1690.9	1122
BUSCOfEOG7KWSTD	Duplicated	DR_scaffold_0003	547891	559523	748.3	583
BUSCOfEOG7SJDGT	Duplicated	DR_scaffold_0271	24785	35517	339.4	181
BUSCOfEOG7K3TX9	Complete	DR_scaffold_0279	7840	19223	706	443
BUSCOfEOG71ZPBX	Duplicated	DR_scaffold_0137	86600	97509	533.9	306
BUSCOfEOG7DRJF3	Complete	DR_scaffold_0100	173088	183462	304.1	196
BUSCOfEOG7FR7RC	Duplicated	DR_scaffold_0287	40108	52634	1140.6	837
BUSCOfEOG7XSTRS	Complete	DR_scaffold_0263	53658	64439	348.2	245
BUSCOfEOG7008JT	Duplicated	DR_scaffold_0030	167720	179032	103.3	196
BUSCOfEOG751NSD	Duplicated	DR_scaffold_0007	162018	173562	740.2	498
BUSCOfEOG73V6VV	Complete	DR_scaffold_0097	76098	88104	825.2	621
BUSCOfEOG7B05QC	Duplicated	DR_scaffold_0009	548545	559829	615.4	389
BUSCOfEOG751NQG	Duplicated	DR_scaffold_0013	140659	152090	886	507
BUSCOfEOG7D867D	Duplicated	DR_scaffold_0041	220160	230966	583.9	389
BUSCOfEOG7TXKW3	Duplicated	DR_scaffold_0139	105868	116175	168.5	119
BUSCOfEOG7QG4G3	Duplicated	DR_scaffold_0024	387227	397883	325.3	224
BUSCOfEOG7PK977	Duplicated	DR_scaffold_0185	5233	16666	505.6	644
BUSCOfEOG79PJXX	Complete	DR_scaffold_0035	275470	302412	1038.9	677
BUSCOfEOG715QF5	Duplicated	DR_scaffold_0011	120618	132090	786.2	489
BUSCOfEOG70ZZWZ	Duplicated	DR_scaffold_0252	21188	34460	757	485
BUSCOfEOG7TQV9T	Duplicated	DR_scaffold_0012	263521	274743	526.5	381
BUSCOfEOG7KSXMV	Duplicated	DR_scaffold_0024	283980	296399	908.4	669
BUSCOfEOG77WWPP	Duplicated	DR_scaffold_0136	19452	29727	281.9	315
BUSCOfEOG77M8XG	Duplicated	DR_scaffold_0002	366927	378852	1202.4	619
BUSCOfEOG7966T3	Duplicated	DR_scaffold_0015	34212	45508	635.4	482
BUSCOfEOG754J1M	Duplicated	DR_scaffold_0388	10779	21524	360.2	224
BUSCOfEOG7N0CHX	Duplicated	DR_scaffold_0410	5288	15744	186.8	122
BUSCOfEOG7DNP6J	Duplicated	DR_scaffold_0002	754204	764884	146.2	269
BUSCOfEOG7V76GC	Duplicated	DR_scaffold_0311	32755	43961	435	361
BUSCOfEOG712V5N	Duplicated	DR_scaffold_0143	76350	87408	605.4	348
BUSCOfEOG78WM31	Duplicated	DR_scaffold_0026	152266	163102	381.5	330
BUSCOfEOG725DV9	Duplicated	DR_scaffold_0181	0	7272	328.1	265
BUSCOfEOG7VDZ18	Duplicated	DR_scaffold_0010	552701	563156	144.2	170
BUSCOfEOG7RNK8W	Duplicated	DR_scaffold_0002	842818	854042	463.7	398
BUSCOfEOG7FFN1K	Complete	DR_scaffold_0046	203862	215220	584.7	612
BUSCOfEOG73RBNP	Duplicated	DR_scaffold_0025	118420	129686	539.5	293
BUSCOfEOG7B05QM	Duplicated	DR_scaffold_0140	21518	32703	570.2	370
BUSCOfEOG7XSTS6	Duplicated	DR_scaffold_0002	15484	26395	447.4	266
BUSCOfEOG7T7H2J	Duplicated	DR_scaffold_0044	187404	199789	1484.5	804
BUSCOfEOG741ZBG	Duplicated	DR_scaffold_0045	193627	205178	847.4	469
BUSCOfEOG7K0ZNC	Complete	DR_scaffold_0116	85239	96606	892.4	469
BUSCOfEOG769ZXC	Duplicated	DR_scaffold_0405	10946	21482	168.7	194
BUSCOfEOG7MH16T	Duplicated	DR_scaffold_0127	133355	146315	414.3	408
BUSCOfEOG78PVJ7	Duplicated	DR_scaffold_0024	88671	102308	1579.6	1336
BUSCOfEOG7DZ8Z5	Duplicated	DR_scaffold_0116	98677	108991	192.2	118
BUSCOfEOG76HQDT	Duplicated	DR_scaffold_0200	21596	32183	220.1	132
BUSCOfEOG70PC83	Duplicated	DR_scaffold_0019	48750	59196	541	530
BUSCOfEOG7DVDK9	Complete	DR_scaffold_0005	102291	116673	2446.6	1400
BUSCOfEOG751NQP	Duplicated	DR_scaffold_0021	247259	259153	793.2	621
BUSCOfEOG7PVX27	Duplicated	DR_scaffold_0020	248094	262839	1032.7	576
BUSCOfEOG7WHHK1	Duplicated	DR_scaffold_0681	0	9375	1083.1	712
BUSCOfEOG7PVX16	Duplicated	DR_scaffold_0021	123444	134285	348.8	283
BUSCOfEOG7RBZKC	Duplicated	DR_scaffold_0086	100009	111570	819.6	472
BUSCOfEOG7PCJRV	Duplicated	DR_scaffold_0095	116537	126944	352.8	469
BUSCOfEOG7PVX0C	Complete	DR_scaffold_0024	108757	119803	614.8	390
BUSCOfEOG7SN8P3	Duplicated	DR_scaffold_0080	50489	61137	423.6	300
BUSCOfEOG75XGZ9	Duplicated	DR_scaffold_0010	147524	158034	310	218
BUSCOfEOG7GTTCP	Duplicated	DR_scaffold_0010	524172	535216	609	574
BUSCOfEOG7ZWDB2	Duplicated	DR_scaffold_0179	71317	83017	787.6	428
BUSCOfEOG7MD52N	Complete	DR_scaffold_0147	13071	23895	429.5	214
BUSCOfEOG71VT21	Duplicated	DR_scaffold_0179	54980	68957	2147	1353
BUSCOfEOG71P2KZ	Duplicated	DR_scaffold_0011	457411	468652	824.9	542
BUSCOfEOG7WMCW5	Complete	DR_scaffold_0024	375452	386911	616.3	413
BUSCOfEOG7380D8	Fragmented	DR_scaffold_0041	44991	59332	1258.8	704
BUSCOfEOG7KWSTD	Duplicated	DR_scaffold_0043	116264	127792	204.9	345
BUSCOfEOG7H4F5X	Duplicated	DR_scaffold_0043	57241	67697	253.6	220
BUSCOfEOG715QDR	Duplicated	DR_scaffold_0309	25958	36997	621.8	378
BUSCOfEOG7Z3FFT	Duplicated	DR_scaffold_0047	94784	105855	439.9	269
BUSCOfEOG79W9DR	Duplicated	DR_scaffold_0012	73204	85141	722	638
BUSCOfEOG79PK0S	Duplicated	DR_scaffold_0019	265057	276121	562.3	260
BUSCOfEOG7Z95XS	Duplicated	DR_scaffold_0002	531152	541358	220.6	273
BUSCOfEOG75QRCP	Duplicated	DR_scaffold_0223	52690	64971	1328.8	865
BUSCOfEOG779P6J	Duplicated	DR_scaffold_0156	60313	72907	1395.4	879
BUSCOfEOG71GB67	Duplicated	DR_scaffold_0047	185943	196756	524.4	240
BUSCOfEOG7QNVVM	Duplicated	DR_scaffold_0031	84683	96485	1145.1	631
BUSCOfEOG7008K4	Duplicated	DR_scaffold_0037	56046	66996	104.7	128
BUSCOfEOG7FV406	Complete	DR_scaffold_0087	108697	120606	856.9	616
BUSCOfEOG7GBG86	Duplicated	DR_scaffold_0017	394471	405150	391.7	174
BUSCOfEOG7CRTZ8	Duplicated	DR_scaffold_0004	532525	544691	1171.7	1539
BUSCOfEOG7NPG2S	Duplicated	DR_scaffold_0011	365098	378924	1782.2	1244
BUSCOfEOG7673KF	Duplicated	DR_scaffold_0159	9791	23267	1772.3	1140
BUSCOfEOG7WT4CT	Duplicated	DR_scaffold_0033	66654	77151	372.5	253
BUSCOfEOG7SFJ6P	Duplicated	DR_scaffold_0076	52979	63917	484.7	313
BUSCOfEOG7CZKHC	Duplicated	DR_scaffold_0348	3808	14753	449.5	305
BUSCOfEOG7VMPGM	Complete	DR_scaffold_0017	340548	351231	397.1	239
BUSCOfEOG70CRJQ	Duplicated	DR_scaffold_0029	224992	235550	390.8	288
BUSCOfEOG7PCJS1	Duplicated	DR_scaffold_0013	371235	382416	615.5	400
BUSCOfEOG7HTHSN	Fragmented	DR_scaffold_0035	245647	258827	418.3	225
BUSCOfEOG747PT4	Duplicated	DR_scaffold_0010	239337	250632	768.1	540
BUSCOfEOG7WX0KW	Duplicated	DR_scaffold_0137	131446	142993	347.7	429
BUSCOfEOG7M6DJ5	Duplicated	DR_scaffold_0031	354731	366269	679.8	402
BUSCOfEOG75MW6R	Duplicated	DR_scaffold_0101	5105	15768	352.5	303
BUSCOfEOG7008K4	Duplicated	DR_scaffold_0024	235745	249664	507.8	286
BUSCOfEOG7VB2QQ	Duplicated	DR_scaffold_0091	187526	199804	862.7	613
BUSCOfEOG7WHHNH	Duplicated	DR_scaffold_0012	485025	495667	404	201
BUSCOfEOG78M09Q	Duplicated	DR_scaffold_0127	81833	93170	787.5	612
BUSCOfEOG7F253S	Duplicated	DR_scaffold_0179	27059	37980	460.9	325
BUSCOfEOG78M09Q	Duplicated	DR_scaffold_0035	49676	61041	778.5	613
BUSCOfEOG7WHHK2	Duplicated	DR_scaffold_0250	12001	24536	1425.7	949
BUSCOfEOG793BHK	Duplicated	DR_scaffold_0256	36885	48645	1121.9	531
BUSCOfEOG7G4QSH	Duplicated	DR_scaffold_0109	98461	109048	514.5	347
BUSCOfEOG7VB2RJ	Duplicated	DR_scaffold_0006	298289	309411	483.4	367
BUSCOfEOG7G1VG0	Duplicated	DR_scaffold_0200	31951	56908	1898.2	1061
BUSCOfEOG72VHFN	Duplicated	DR_scaffold_0002	70677	82492	965.8	682
BUSCOfEOG7VX96G	Duplicated	DR_scaffold_0059	246218	256961	338.9	225
BUSCOfEOG7K6Q66	Duplicated	DR_scaffold_0013	188601	199359	444.9	381
BUSCOfEOG7TTQH2	Duplicated	DR_scaffold_0072	192812	205928	1904.8	1086
BUSCOfEOG7S7SRV	Duplicated	DR_scaffold_0156	59065	69820	422.6	220
BUSCOfEOG7WQ84C	Duplicated	DR_scaffold_0022	156767	167960	350.6	276
BUSCOfEOG7C8GSW	Duplicated	DR_scaffold_0124	154456	165520	700.8	337
BUSCOfEOG7J44J3	Duplicated	DR_scaffold_0201	26633	37490	431.9	279
BUSCOfEOG7D2FR2	Duplicated	DR_scaffold_0053	78989	90190	561.2	483
BUSCOfEOG71P2Q2	Duplicated	DR_scaffold_0141	58384	68899	211.4	124
BUSCOfEOG7H1JV1	Duplicated	DR_scaffold_0016	106181	118580	1300.5	968
BUSCOfEOG7ZD249	Duplicated	DR_scaffold_0282	23070	34544	1035.9	495
BUSCOfEOG7NPG2M	Duplicated	DR_scaffold_0280	20298	32913	1162.3	1173
BUSCOfEOG7GJ6PG	Duplicated	DR_scaffold_0342	18524	29629	772.5	568
BUSCOfEOG7SV15G	Duplicated	DR_scaffold_0119	93426	107809	557.1	296
BUSCOfEOG7KWSTW	Duplicated	DR_scaffold_0032	298733	309924	460.5	333
BUSCOfEOG7H1JXQ	Duplicated	DR_scaffold_0144	114402	125417	367.9	339
BUSCOfEOG7RBZJB	Duplicated	DR_scaffold_0020	117303	129765	1479.8	872
BUSCOfEOG7Q8CWQ	Duplicated	DR_scaffold_0013	220011	233313	1168.8	1107
BUSCOfEOG7Q8D04	Duplicated	DR_scaffold_0004	518088	529004	317.3	193
BUSCOfEOG7K0ZMR	Duplicated	DR_scaffold_0114	163218	174690	495.5	368
BUSCOfEOG7J9W16	Duplicated	DR_scaffold_0010	185894	197106	734	488
BUSCOfEOG75QRCP	Duplicated	DR_scaffold_0179	62200	74690	1058.6	787
BUSCOfEOG7G4QQG	Duplicated	DR_scaffold_0054	227943	258626	758.8	474
BUSCOfEOG7NPG2M	Duplicated	DR_scaffold_0267	0	9152	1155.8	1102
BUSCOfEOG7NCVC3	Duplicated	DR_scaffold_0001	767879	779678	1027.4	610
BUSCOfEOG7KM64K	Duplicated	DR_scaffold_0080	139417	150175	401.5	260
BUSCOfEOG7F7WKM	Duplicated	DR_scaffold_0012	340508	352052	507.2	493
BUSCOfEOG78M09B	Duplicated	DR_scaffold_0116	69516	82514	1168.7	999
BUSCOfEOG7H4F3M	Duplicated	DR_scaffold_0021	282895	295597	1222.8	817
BUSCOfEOG70PC63	Duplicated	DR_scaffold_0116	77757	90698	1294.4	897
BUSCOfEOG7JQBX8	Duplicated	DR_scaffold_0096	9699	23194	404.9	684
BUSCOfEOG7MSMZ2	Duplicated	DR_scaffold_0103	59873	72119	1184.7	791
BUSCOfEOG7BW0V6	Complete	DR_scaffold_0067	74664	85986	804.3	477
BUSCOfEOG7W15CT	Duplicated	DR_scaffold_0012	278710	291483	959.8	812
BUSCOfEOG72894C	Duplicated	DR_scaffold_0073	117025	127385	245.4	178
BUSCOfEOG7RV9QQ	Duplicated	DR_scaffold_0016	73651	88124	1135.9	754
BUSCOfEOG79KPTV	Duplicated	DR_scaffold_0181	44461	54685	177.7	144
BUSCOfEOG7FZ06K	Duplicated	DR_scaffold_0075	163813	176864	1824.4	1727
BUSCOfEOG7SN8NM	Duplicated	DR_scaffold_0020	208528	219690	526.3	515
BUSCOfEOG7BS4NR	Duplicated	DR_scaffold_0083	8040	18609	346.9	202
BUSCOfEOG7FBRS5	Duplicated	DR_scaffold_0021	173204	185129	861	687
BUSCOfEOG7M0P2N	Duplicated	DR_scaffold_0023	150198	161126	557.3	294
BUSCOfEOG79GTHH	Duplicated	DR_scaffold_0071	156316	167943	668.5	595
BUSCOfEOG78M0B3	Fragmented	DR_scaffold_0102	112699	124514	274.5	228
BUSCOfEOG7TJ3TQ	Duplicated	DR_scaffold_0031	198201	209241	453.6	332
BUSCOfEOG7D5B0C	Duplicated	DR_scaffold_0133	63618	74337	477.4	309
BUSCOfEOG7WT4CC	Duplicated	DR_scaffold_0065	180705	191258	290.8	194
BUSCOfEOG7B8SCW	Duplicated	DR_scaffold_0048	98997	110481	672.2	484
BUSCOfEOG73BVMX	Duplicated	DR_scaffold_0068	106753	120201	1091.3	1148
BUSCOfEOG7F2542	Duplicated	DR_scaffold_0002	254268	265294	521.3	334
BUSCOfEOG70CRGF	Complete	DR_scaffold_0044	286254	298067	1040.4	590
BUSCOfEOG7VTDZ9	Duplicated	DR_scaffold_0053	277532	289282	1031.5	881
BUSCOfEOG7Q2NFT	Duplicated	DR_scaffold_0034	171018	200952	1536.9	986
BUSCOfEOG7B5X4M	Duplicated	DR_scaffold_0010	281367	293085	909	736
BUSCOfEOG75MW6X	Duplicated	DR_scaffold_0054	30618	40896	229	185
BUSCOfEOG7XSTQ5	Duplicated	DR_scaffold_0011	468311	479410	678.3	382
BUSCOfEOG7M3J7M	Duplicated	DR_scaffold_0094	80122	93277	1407.4	1048
BUSCOfEOG715QDR	Duplicated	DR_scaffold_0253	2342	13394	615.4	360
BUSCOfEOG7X9GGC	Duplicated	DR_scaffold_0157	92622	105790	1723.4	1022
BUSCOfEOG7PK9BN	Duplicated	DR_scaffold_0066	175048	185641	417	173
BUSCOfEOG744TM6	Duplicated	DR_scaffold_0054	132388	143419	532.4	350
BUSCOfEOG79KPPX	Duplicated	DR_scaffold_0024	78204	90219	558.9	605
BUSCOfEOG7BGHWP	Duplicated	DR_scaffold_0096	83879	94913	644.6	359
BUSCOfEOG7034RG	Duplicated	DR_scaffold_0004	494104	506339	1394.5	679
BUSCOfEOG73NGD9	Duplicated	DR_scaffold_0205	39604	56943	620.1	367
BUSCOfEOG71GB4R	Duplicated	DR_scaffold_0177	82584	94767	1026.4	743
BUSCOfEOG7VX96G	Duplicated	DR_scaffold_0023	45158	55903	341	225
BUSCOfEOG7KSXJ9	Duplicated	DR_scaffold_0199	35913	49134	2033.2	1142
BUSCOfEOG7HHX1P	Duplicated	DR_scaffold_0212	23600	35344	1027.1	617
BUSCOfEOG799302	Duplicated	DR_scaffold_0090	8395	21121	1708.3	952
BUSCOfEOG7VHT6T	Duplicated	DR_scaffold_0038	307906	319255	774.7	449
BUSCOfEOG7NW6JP	Duplicated	DR_scaffold_0041	86719	100322	890.1	679
BUSCOfEOG7BW0T1	Duplicated	DR_scaffold_0001	309275	321891	1195.1	821
BUSCOfEOG7BP8C2	Duplicated	DR_scaffold_0220	35498	46697	859.8	404
BUSCOfEOG7J9W16	Duplicated	DR_scaffold_0013	99302	110408	735.5	456
BUSCOfEOG7DVDN4	Fragmented	DR_scaffold_0124	33765	45076	609.2	393
BUSCOfEOG74TX6Z	Duplicated	DR_scaffold_0103	107535	121040	1972	1165
BUSCOfEOG7ZGXF1	Duplicated	DR_scaffold_0028	320081	330842	499.8	384
BUSCOfEOG72891J	Complete	DR_scaffold_0028	321450	333397	816	706
BUSCOfEOG74R247	Duplicated	DR_scaffold_0127	165239	175594	223.1	113
BUSCOfEOG7K9KC2	Duplicated	DR_scaffold_0035	96424	107471	437.6	474
BUSCOfEOG7P8PN5	Duplicated	DR_scaffold_0010	276877	287310	198.7	112
BUSCOfEOG7RRFJ7	Duplicated	DR_scaffold_0064	44384	55535	623.6	387
BUSCOfEOG7ZWDCC	Duplicated	DR_scaffold_0006	89099	100384	533.9	415
BUSCOfEOG7NPG3Q	Duplicated	DR_scaffold_0026	364749	379267	819.7	388
BUSCOfEOG7X9GJ0	Fragmented	DR_scaffold_0059	31894	42487	230.5	157
BUSCOfEOG7FJH8G	Fragmented	DR_scaffold_0299	19810	31530	365.3	265
BUSCOfEOG78D7VT	Duplicated	DR_scaffold_0111	56614	68590	995.4	617
BUSCOfEOG7WQ81K	Duplicated	DR_scaffold_0200	7313	21465	685.8	987
BUSCOfEOG76QFVQ	Duplicated	DR_scaffold_0024	341703	352035	74.3	244
BUSCOfEOG7KSXMV	Duplicated	DR_scaffold_0054	90746	103282	918.4	670
BUSCOfEOG7P8PJ3	Complete	DR_scaffold_0250	34423	45841	691.6	590
BUSCOfEOG7TXKRS	Duplicated	DR_scaffold_0237	21821	33201	548.4	385
BUSCOfEOG72C57M	Duplicated	DR_scaffold_0024	185900	201016	2658.5	1745
BUSCOfEOG7FR7S9	Fragmented	DR_scaffold_0034	221175	231777	320.4	217
BUSCOfEOG7712J9	Duplicated	DR_scaffold_0266	9635	20759	596.7	355
BUSCOfEOG7VB2QQ	Duplicated	DR_scaffold_0007	544452	556642	857.1	589
BUSCOfEOG7KDFMZ	Complete	DR_scaffold_0140	19382	30479	177.5	342
BUSCOfEOG7TJ3VQ	Duplicated	DR_scaffold_0204	25139	35450	253.8	187
BUSCOfEOG7SN8RW	Duplicated	DR_scaffold_0224	41801	52322	233.1	124
BUSCOfEOG7ZGXC2	Duplicated	DR_scaffold_0102	201582	213000	693.6	462
BUSCOfEOG7GFBFJ	Duplicated	DR_scaffold_0083	71126	82922	608.6	437
BUSCOfEOG7PS1S5	Duplicated	DR_scaffold_0068	136542	147251	318.3	262
BUSCOfEOG7K9KDQ	Duplicated	DR_scaffold_0140	2688	15444	1341.6	940
BUSCOfEOG7GXPP8	Duplicated	DR_scaffold_0001	274120	285293	838.5	501
BUSCOfEOG7DC2DF	Duplicated	DR_scaffold_0083	153249	165092	974.9	533
BUSCOfEOG7MWH87	Duplicated	DR_scaffold_0167	648	12625	833.9	605
BUSCOfEOG73BVNC	Complete	DR_scaffold_0021	236221	251690	1825.3	1092
BUSCOfEOG7XM36Z	Fragmented	DR_scaffold_0004	760316	773274	684	405
BUSCOfEOG77DJHR	Duplicated	DR_scaffold_0116	170105	181424	657.3	537
BUSCOfEOG7380FP	Complete	DR_scaffold_0012	231337	242554	547.6	302
BUSCOfEOG7KQ2CK	Duplicated	DR_scaffold_0297	29276	39565	288.6	274
BUSCOfEOG7ZPNVK	Duplicated	DR_scaffold_0115	95214	106771	666.3	474
BUSCOfEOG7VB2QZ	Duplicated	DR_scaffold_0141	7576	18496	534.5	369
BUSCOfEOG7TJ3S6	Duplicated	DR_scaffold_0118	139403	153177	1716.3	1107
BUSCOfEOG7RFTRP	Duplicated	DR_scaffold_0031	352361	363376	530.3	753
BUSCOfEOG741ZD8	Duplicated	DR_scaffold_0059	135693	146433	394	230
BUSCOfEOG776T0T	Duplicated	DR_scaffold_0045	99017	109553	266.4	183
BUSCOfEOG722JJ1	Duplicated	DR_scaffold_0083	144882	157188	817.5	699
BUSCOfEOG7HHX3R	Duplicated	DR_scaffold_0064	59713	70847	608.3	501
BUSCOfEOG7Z95WZ	Duplicated	DR_scaffold_0092	212757	223997	663	350
BUSCOfEOG7PVX27	Duplicated	DR_scaffold_0021	34880	49377	1024.6	576
BUSCOfEOG71VT21	Duplicated	DR_scaffold_0223	45334	58974	2143.2	1347
BUSCOfEOG7QG4H3	Duplicated	DR_scaffold_0045	48099	58362	150.8	103
BUSCOfEOG741ZC1	Duplicated	DR_scaffold_0028	227058	238605	525.4	451
BUSCOfEOG7SV166	Duplicated	DR_scaffold_0132	112177	123399	814.7	402
BUSCOfEOG7PZS60	Duplicated	DR_scaffold_0128	72218	84579	498.1	825
BUSCOfEOG7HXD0B	Duplicated	DR_scaffold_0476	4452	15939	537.3	626
BUSCOfEOG79PJXZ	Duplicated	DR_scaffold_0033	267557	280058	1631.4	1322
BUSCOfEOG7G7M2F	Duplicated	DR_scaffold_0043	214217	224687	327	292
BUSCOfEOG7CZKHC	Duplicated	DR_scaffold_0024	51548	62674	460.3	305
BUSCOfEOG793BK3	Duplicated	DR_scaffold_0020	227307	238089	350.9	281
BUSCOfEOG757D6F	Duplicated	DR_scaffold_0351	3250	15396	1033.3	662
BUSCOfEOG7T1RKM	Duplicated	DR_scaffold_0109	56136	69118	1375	986
BUSCOfEOG7X0VV3	Complete	DR_scaffold_0005	76928	87614	353.8	243
BUSCOfEOG7673K5	Duplicated	DR_scaffold_0086	5658	18343	1408.6	929
BUSCOfEOG7PVWXQ	Duplicated	DR_scaffold_0055	263406	277015	2173.9	1200
BUSCOfEOG712V4J	Duplicated	DR_scaffold_0155	86409	106075	4699.8	3085
BUSCOfEOG7BP8C2	Duplicated	DR_scaffold_0161	115089	126108	316.8	332
BUSCOfEOG7N0CHQ	Duplicated	DR_scaffold_0015	345992	356447	438.5	364
BUSCOfEOG74N5S9	Duplicated	DR_scaffold_0364	11385	22778	924.9	462
BUSCOfEOG7GQZ3Z	Duplicated	DR_scaffold_0010	386782	402091	2281.7	1704
BUSCOfEOG74TX76	Complete	DR_scaffold_0005	332100	393405	1060.2	753
BUSCOfEOG7SN8MQ	Duplicated	DR_scaffold_0033	280208	295848	2627.3	1955
BUSCOfEOG747PS9	Duplicated	DR_scaffold_0020	130078	143976	1782.9	1383
BUSCOfEOG7QNVWW	Duplicated	DR_scaffold_0231	45061	64317	1144.6	477
BUSCOfEOG72G1GS	Duplicated	DR_scaffold_0064	167235	178554	834.4	456
BUSCOfEOG72RN6D	Duplicated	DR_scaffold_0081	172829	185146	941.1	726
BUSCOfEOG7J9W22	Duplicated	DR_scaffold_0056	152701	162844	231.6	174
BUSCOfEOG7712J5	Duplicated	DR_scaffold_0134	111033	123320	588.3	336
BUSCOfEOG74FFC7	Duplicated	DR_scaffold_0229	17942	35897	171.8	430
BUSCOfEOG7RBZN0	Complete	DR_scaffold_0218	45721	58313	1154.2	1000
BUSCOfEOG7SR4ZT	Fragmented	DR_scaffold_0053	60520	70828	204	129
BUSCOfEOG75TMNG	Duplicated	DR_scaffold_0024	294744	306333	1013	730
BUSCOfEOG7XH72F	Complete	DR_scaffold_0102	160580	171311	312.5	205
BUSCOfEOG7RFTVR	Duplicated	DR_scaffold_0152	18918	29352	225.6	236
BUSCOfEOG7F51DN	Complete	DR_scaffold_0282	28209	38702	267.3	183
BUSCOfEOG7R2BV4	Duplicated	DR_scaffold_0115	13173	23970	415.3	419
BUSCOfEOG7QG4GH	Duplicated	DR_scaffold_0144	5629	16043	191.8	137
BUSCOfEOG7KWSS4	Duplicated	DR_scaffold_0076	64316	77321	1761.7	983
BUSCOfEOG7VQJQS	Duplicated	DR_scaffold_0060	152605	163562	218.9	290
BUSCOfEOG7QNVX7	Duplicated	DR_scaffold_0006	133013	144093	568.3	372
BUSCOfEOG7HB5K9	Duplicated	DR_scaffold_0061	246226	257987	678.3	535
BUSCOfEOG7MPRRX	Complete	DR_scaffold_0106	185995	196583	317.9	246
BUSCOfEOG72G1GS	Duplicated	DR_scaffold_0044	289099	299989	317.6	308
BUSCOfEOG7F7WJV	Complete	DR_scaffold_0046	157935	169691	1054.8	499
BUSCOfEOG7T4MVB	Complete	DR_scaffold_0003	683545	695726	952.2	675
BUSCOfEOG725DVD	Duplicated	DR_scaffold_0192	73561	84931	627.6	417
BUSCOfEOG7RV9TT	Duplicated	DR_scaffold_0023	43495	53899	322.1	396
BUSCOfEOG7CCC0D	Duplicated	DR_scaffold_0034	209562	222609	2281.8	1604
BUSCOfEOG70PC6K	Complete	DR_scaffold_0044	174370	186506	544.9	555
BUSCOfEOG71CFWK	Duplicated	DR_scaffold_0018	365293	376872	558.3	411
BUSCOfEOG7FV40Z	Duplicated	DR_scaffold_0100	162575	173408	541.3	420
BUSCOfEOG7GTTD4	Duplicated	DR_scaffold_0015	146702	158117	649.1	521
BUSCOfEOG7RBZHR	Duplicated	DR_scaffold_0086	186784	200552	1080.1	1154
BUSCOfEOG7Z0K5V	Duplicated	DR_scaffold_0026	204342	215600	798.9	425
BUSCOfEOG72VHFB	Duplicated	DR_scaffold_0168	18651	32415	2068.3	1272
BUSCOfEOG7QVMC1	Duplicated	DR_scaffold_0026	364776	379432	719.9	430
BUSCOfEOG7NSB9K	Duplicated	DR_scaffold_0177	57178	73941	2925.8	2575
BUSCOfEOG74N5S8	Duplicated	DR_scaffold_0212	37827	49170	714.9	425
BUSCOfEOG7P2Z2M	Duplicated	DR_scaffold_0223	32343	43801	447.5	451
BUSCOfEOG7Z95VT	Duplicated	DR_scaffold_0089	75273	87047	726.5	415
BUSCOfEOG747PT0	Duplicated	DR_scaffold_0002	700479	711475	364.5	217
BUSCOfEOG71CFWG	Duplicated	DR_scaffold_0113	119940	131233	517.7	430
BUSCOfEOG747PVB	Duplicated	DR_scaffold_0077	80390	90860	428.5	485
BUSCOfEOG78D7TX	Duplicated	DR_scaffold_0128	70229	81698	683.4	502
BUSCOfEOG7HMS8M	Duplicated	DR_scaffold_0038	171693	184528	1522.4	917
BUSCOfEOG7ZSJ2V	Duplicated	DR_scaffold_0088	96762	107931	801.6	624
BUSCOfEOG754HXV	Duplicated	DR_scaffold_0012	258662	272423	2097.1	1183
BUSCOfEOG70KGZ3	Duplicated	DR_scaffold_0186	28392	40866	1531.5	877
BUSCOfEOG7VHT6S	Duplicated	DR_scaffold_0180	68394	79650	750.7	358
BUSCOfEOG7PS1RB	Duplicated	DR_scaffold_0006	300035	311024	682.4	337
BUSCOfEOG7NSBBC	Duplicated	DR_scaffold_0129	66220	102233	635.7	550
BUSCOfEOG7VDZ15	Duplicated	DR_scaffold_0111	129321	139949	462.5	310
BUSCOfEOG786HFQ	Duplicated	DR_scaffold_0119	20804	30986	306.6	194
BUSCOfEOG7MSMZD	Duplicated	DR_scaffold_0006	199026	210906	743.3	769
BUSCOfEOG7ZD23T	Duplicated	DR_scaffold_0030	112090	124325	966.6	843
BUSCOfEOG7BS4JW	Duplicated	DR_scaffold_0022	54046	66373	927.9	996
BUSCOfEOG7VTDWK	Complete	DR_scaffold_0005	728296	740987	1394.7	1057
BUSCOfEOG7BGHWR	Duplicated	DR_scaffold_0010	459524	470560	587.6	375
BUSCOfEOG7GJ6P5	Duplicated	DR_scaffold_0069	90320	101507	690.5	448
BUSCOfEOG7SBP03	Duplicated	DR_scaffold_0106	157936	169000	613.8	378
BUSCOfEOG7M0P3P	Duplicated	DR_scaffold_0104	71347	82025	324.8	183
BUSCOfEOG76TB3F	Duplicated	DR_scaffold_0073	44636	55193	472.5	315
BUSCOfEOG7TBCBV	Duplicated	DR_scaffold_0002	753697	764713	642.9	374
BUSCOfEOG7B05NN	Duplicated	DR_scaffold_0271	26800	51701	1121.1	819
BUSCOfEOG75B8JB	Duplicated	DR_scaffold_0012	434756	445616	445.2	294
BUSCOfEOG7XPZJ6	Duplicated	DR_scaffold_0021	287069	297820	398.9	244
BUSCOfEOG7NKKXH	Duplicated	DR_scaffold_0134	103179	113646	210.4	196
BUSCOfEOG77T1G6	Duplicated	DR_scaffold_0018	417258	430718	803.4	625
BUSCOfEOG7F7WKS	Duplicated	DR_scaffold_0075	214118	229229	1591.2	1250
BUSCOfEOG74N5VD	Duplicated	DR_scaffold_0086	51543	61875	196.1	134
BUSCOfEOG7ZGXF1	Duplicated	DR_scaffold_0006	352545	363306	497.4	382
BUSCOfEOG77WWN5	Duplicated	DR_scaffold_0062	199545	211132	1002.3	720
BUSCOfEOG7SN8PR	Duplicated	DR_scaffold_0078	122171	132980	460.3	316
BUSCOfEOG7X0VT2	Duplicated	DR_scaffold_0001	207309	218404	581.4	330
BUSCOfEOG7NPG3J	Duplicated	DR_scaffold_0060	17025	28717	735	480
BUSCOfEOG7XDBSF	Duplicated	DR_scaffold_0090	95746	106699	606.2	392
BUSCOfEOG7JQC05	Duplicated	DR_scaffold_0008	478566	489347	388.7	286
BUSCOfEOG7J9VZZ	Complete	DR_scaffold_0221	53991	64734	576	410
BUSCOfEOG75MW6G	Complete	DR_scaffold_0134	104399	115004	371.3	285
BUSCOfEOG744TM6	Duplicated	DR_scaffold_0024	241874	252915	522.3	342
BUSCOfEOG76MKNV	Duplicated	DR_scaffold_0539	2015	12542	236.2	109
BUSCOfEOG78WM3D	Duplicated	DR_scaffold_0181	43345	54128	459.1	258
BUSCOfEOG7RBZJM	Duplicated	DR_scaffold_0193	77804	89494	925.1	741
BUSCOfEOG7CCC18	Duplicated	DR_scaffold_0156	105169	117038	743.5	567
BUSCOfEOG7WDNF3	Duplicated	DR_scaffold_0001	184742	195401	395.9	231
BUSCOfEOG7XM380	Duplicated	DR_scaffold_0339	5215	16807	800	530
BUSCOfEOG7ZD23T	Duplicated	DR_scaffold_0092	18948	31183	1193	962
BUSCOfEOG7PGF35	Duplicated	DR_scaffold_0019	264255	274704	264	205
BUSCOfEOG780RZC	Duplicated	DR_scaffold_0002	372870	383803	497.2	247
BUSCOfEOG7XM36Z	Fragmented	DR_scaffold_0070	64406	77459	712.5	446
BUSCOfEOG7K9KD3	Duplicated	DR_scaffold_0033	381804	393363	649.9	500
BUSCOfEOG7Z0K4N	Duplicated	DR_scaffold_0168	7639	22694	2066	1595
BUSCOfEOG70W3S0	Duplicated	DR_scaffold_0215	27755	38137	370	329
BUSCOfEOG72NS1Q	Duplicated	DR_scaffold_0020	41003	51583	435.7	460
BUSCOfEOG706124	Duplicated	DR_scaffold_0033	313269	324717	731.3	438
BUSCOfEOG7ZKSP0	Complete	DR_scaffold_0033	274527	285612	515.8	362
BUSCOfEOG73V6WQ	Duplicated	DR_scaffold_0152	102917	113624	363.7	246
BUSCOfEOG7WDN9V	Duplicated	DR_scaffold_0081	97783	110716	1910.8	1241
BUSCOfEOG7X3R27	Duplicated	DR_scaffold_0129	42341	55596	1206.3	1218
BUSCOfEOG71K6CX	Duplicated	DR_scaffold_0278	45933	57669	545.7	501
BUSCOfEOG76HQDG	Duplicated	DR_scaffold_0181	0	26016	283.4	301
BUSCOfEOG715QCC	Duplicated	DR_scaffold_0003	731895	747182	2447.9	1594
BUSCOfEOG7JT755	Complete	DR_scaffold_0222	123	11679	849	569
BUSCOfEOG7008JT	Duplicated	DR_scaffold_0364	0	8967	437.4	275
BUSCOfEOG7WQ84C	Duplicated	DR_scaffold_0125	33072	44347	343.4	271
BUSCOfEOG72JWTK	Duplicated	DR_scaffold_0022	201841	212462	336.2	158
BUSCOfEOG7GJ6PB	Duplicated	DR_scaffold_0057	124357	135700	595.4	422
BUSCOfEOG7TTQJ2	Complete	DR_scaffold_0005	513163	524571	857.2	471
BUSCOfEOG73281W	Duplicated	DR_scaffold_0174	38297	48794	256	158
BUSCOfEOG75J0XC	Duplicated	DR_scaffold_0041	188882	200265	830.6	441
BUSCOfEOG7W9S43	Duplicated	DR_scaffold_0149	111926	123405	671.9	488
BUSCOfEOG7H79FB	Duplicated	DR_scaffold_0006	359376	369879	232.9	126
BUSCOfEOG7P02TJ	Duplicated	DR_scaffold_0083	195730	208265	1289	863
BUSCOfEOG7SFJ5S	Duplicated	DR_scaffold_0038	72309	83512	583.5	539
BUSCOfEOG7N63VZ	Duplicated	DR_scaffold_0015	251929	266020	1343.3	1341
BUSCOfEOG7QRR3J	Duplicated	DR_scaffold_0245	3692	40215	686.6	596
BUSCOfEOG7RFTT2	Duplicated	DR_scaffold_0105	48923	60986	830.4	693
BUSCOfEOG7JHMH4	Duplicated	DR_scaffold_0024	83408	94290	475.4	299
BUSCOfEOG7R83CW	Duplicated	DR_scaffold_0103	113871	124608	431.2	300
BUSCOfEOG77WWR0	Duplicated	DR_scaffold_0064	131009	141568	337.6	195
BUSCOfEOG75MW8C	Duplicated	DR_scaffold_0015	162226	172387	178.2	166
BUSCOfEOG7DVDQB	Complete	DR_scaffold_0003	783855	794433	287.4	199
BUSCOfEOG7TJ3TH	Duplicated	DR_scaffold_0022	34009	45250	482.8	374
BUSCOfEOG71P2N2	Duplicated	DR_scaffold_0067	172823	183723	696.4	394
BUSCOfEOG7X3R0Z	Duplicated	DR_scaffold_0145	27864	40371	1101.4	908
BUSCOfEOG7712J9	Duplicated	DR_scaffold_0031	267712	278845	590.4	356
BUSCOfEOG7S7SRV	Duplicated	DR_scaffold_0053	76620	87099	419.3	220
BUSCOfEOG7G7KZ2	Duplicated	DR_scaffold_0060	8691	20126	572.7	539
BUSCOfEOG75TMPT	Complete	DR_scaffold_0005	606912	618606	768.7	471
BUSCOfEOG7RFTVM	Duplicated	DR_scaffold_0103	0	8008	442.7	235
BUSCOfEOG7FZ09D	Complete	DR_scaffold_0124	49000	59675	390.9	224
BUSCOfEOG7JDR8D	Duplicated	DR_scaffold_0013	511028	522434	759.3	529
BUSCOfEOG7FBRWV	Duplicated	DR_scaffold_0035	23208	33562	171.4	114
BUSCOfEOG7Z95X9	Duplicated	DR_scaffold_0236	30396	41495	607.5	334
BUSCOfEOG7WX0JP	Duplicated	DR_scaffold_0010	179405	190538	648.8	403
BUSCOfEOG7GN2WM	Duplicated	DR_scaffold_0065	651	12439	971.6	608
BUSCOfEOG7QRR35	Duplicated	DR_scaffold_0166	97768	110585	1169.1	1218
BUSCOfEOG70610P	Duplicated	DR_scaffold_0089	196219	207663	800.9	722
BUSCOfEOG7C8GV0	Fragmented	DR_scaffold_0221	10877	21744	494.5	247
BUSCOfEOG79KPPM	Duplicated	DR_scaffold_0090	1104	15146	2111.5	1541
BUSCOfEOG7VB2RC	Duplicated	DR_scaffold_0053	286339	297313	325.1	299
BUSCOfEOG77DJJM	Duplicated	DR_scaffold_0229	29714	40257	330.9	201
BUSCOfEOG73V6W0	Duplicated	DR_scaffold_0116	178949	190313	773.3	398
BUSCOfEOG7F51C4	Duplicated	DR_scaffold_0058	118592	129122	411.1	303
BUSCOfEOG75F4PS	Fragmented	DR_scaffold_0113	25464	36788	385.3	188
BUSCOfEOG7FZ07M	Duplicated	DR_scaffold_0064	125736	137187	1087.3	457
BUSCOfEOG7PZS60	Duplicated	DR_scaffold_0139	64853	77214	497	732
BUSCOfEOG72NRZG	Duplicated	DR_scaffold_0035	100120	112846	1359.5	996
BUSCOfEOG7V76GC	Duplicated	DR_scaffold_0009	292311	303950	764.5	551
BUSCOfEOG7KSXK1	Complete	DR_scaffold_0009	109857	120932	650.7	521
BUSCOfEOG7F2528	Duplicated	DR_scaffold_0011	19301	31765	983.9	725
BUSCOfEOG7GXPNJ	Duplicated	DR_scaffold_0095	21237	32289	493.1	335
BUSCOfEOG78D7TX	Duplicated	DR_scaffold_0139	67733	79202	690.2	494
BUSCOfEOG7PVWXS	Duplicated	DR_scaffold_0006	259202	272582	1746.4	1041
BUSCOfEOG7G7M0Q	Duplicated	DR_scaffold_0017	260680	272483	672.9	607
BUSCOfEOG757D5X	Duplicated	DR_scaffold_0075	173265	195248	723.7	718
BUSCOfEOG73BVQ8	Duplicated	DR_scaffold_0062	205913	216884	460.7	261
BUSCOfEOG7WMCVV	Duplicated	DR_scaffold_0108	68122	79042	417	335
BUSCOfEOG70ZZWP	Duplicated	DR_scaffold_0030	292252	305454	1557.5	1043
BUSCOfEOG7N37PR	Duplicated	DR_scaffold_0010	224073	236208	966.1	655
BUSCOfEOG7KDFPN	Duplicated	DR_scaffold_0379	1045	11584	291.5	220
BUSCOfEOG7GBG90	Duplicated	DR_scaffold_0054	112597	123418	155.6	124
BUSCOfEOG7WHHK1	Duplicated	DR_scaffold_0110	56587	71549	1328.9	686
BUSCOfEOG7BGHV7	Duplicated	DR_scaffold_0209	58417	70772	1464.2	759
BUSCOfEOG7P5TBB	Duplicated	DR_scaffold_0103	157250	168836	580.4	529
BUSCOfEOG73RBMT	Duplicated	DR_scaffold_0081	61636	74347	1222.8	902
BUSCOfEOG7P2Z26	Duplicated	DR_scaffold_0039	127756	152786	1051.2	589
BUSCOfEOG7J187V	Duplicated	DR_scaffold_0329	16264	27980	1005.8	701
BUSCOfEOG712V5N	Duplicated	DR_scaffold_0074	197737	208868	541.3	312
BUSCOfEOG7WDNF3	Duplicated	DR_scaffold_0039	213960	224619	397.6	231
BUSCOfEOG7Z69MN	Duplicated	DR_scaffold_0013	409596	424627	2671.4	2167
BUSCOfEOG73JM66	Complete	DR_scaffold_0246	26505	38398	676.2	485
BUSCOfEOG76HQBV	Fragmented	DR_scaffold_0062	109951	121369	629.9	463
BUSCOfEOG7VQJNP	Duplicated	DR_scaffold_0067	0	11109	1000.6	689
BUSCOfEOG7PGF3B	Duplicated	DR_scaffold_0095	43120	53633	271.4	152
BUSCOfEOG757D9B	Duplicated	DR_scaffold_0013	189966	200393	146.1	116
BUSCOfEOG7BGHVG	Duplicated	DR_scaffold_0324	21226	33725	1518.5	1197
BUSCOfEOG7GBG90	Duplicated	DR_scaffold_0024	262639	273450	156.3	123
BUSCOfEOG7VX983	Duplicated	DR_scaffold_0096	119416	129990	204.4	153
BUSCOfEOG70PC9D	Duplicated	DR_scaffold_0113	138415	148783	298.3	209
BUSCOfEOG7M6DK3	Duplicated	DR_scaffold_0104	134052	148910	935.3	578
BUSCOfEOG7W6WX6	Duplicated	DR_scaffold_0134	39935	50489	282.5	215
BUSCOfEOG7KQ29H	Duplicated	DR_scaffold_0261	18957	31108	971	718
BUSCOfEOG7GTTCP	Duplicated	DR_scaffold_0013	441965	453042	766.9	703
BUSCOfEOG7QRR3J	Duplicated	DR_scaffold_0150	115539	127260	717.9	640
BUSCOfEOG7WX0KW	Duplicated	DR_scaffold_0138	111292	123031	359.7	310
BUSCOfEOG7008JB	Duplicated	DR_scaffold_0161	17793	29604	1072	471
BUSCOfEOG7T1RKM	Duplicated	DR_scaffold_0029	215943	228800	1135.5	854
BUSCOfEOG7NW6NW	Duplicated	DR_scaffold_0019	19857	30612	245	154
BUSCOfEOG7TQVCM	Duplicated	DR_scaffold_0030	316626	327172	188	124
BUSCOfEOG7W6WZ8	Complete	DR_scaffold_0005	354209	364756	275.7	197
BUSCOfEOG7J9W22	Duplicated	DR_scaffold_0093	173938	184081	229.3	174
BUSCOfEOG7WX0HQ	Duplicated	DR_scaffold_0029	284322	297870	1819.7	1095
BUSCOfEOG7Q8CWQ	Duplicated	DR_scaffold_0010	302234	315535	1188.4	1068
BUSCOfEOG7X9GGC	Duplicated	DR_scaffold_0018	141394	154440	1451.6	939
BUSCOfEOG77Q57P	Fragmented	DR_scaffold_0056	95078	105494	168.2	125
BUSCOfEOG7VB2SH	Complete	DR_scaffold_0005	497238	507675	360.1	351
BUSCOfEOG7T7H3X	Duplicated	DR_scaffold_0454	4329	16360	489.5	308
BUSCOfEOG7KQ2BG	Duplicated	DR_scaffold_0027	337371	349423	842.4	630
BUSCOfEOG74N5S4	Duplicated	DR_scaffold_0083	108051	119907	845.4	613
BUSCOfEOG7M3JBJ	Fragmented	DR_scaffold_0094	152339	163181	78.7	89
BUSCOfEOG7KQ29H	Duplicated	DR_scaffold_0247	31026	43177	968.7	715
BUSCOfEOG7K9KFM	Duplicated	DR_scaffold_0351	11810	22557	292.7	199
BUSCOfEOG7MH18Q	Duplicated	DR_scaffold_0011	443975	454707	389.4	226
BUSCOfEOG71RXW4	Duplicated	DR_scaffold_0031	379274	391774	942.5	902
BUSCOfEOG7FNCKC	Duplicated	DR_scaffold_0404	0	13795	1091.4	708
BUSCOfEOG74FF9N	Duplicated	DR_scaffold_0394	2151	13160	563.8	406
BUSCOfEOG7FJH9X	Duplicated	DR_scaffold_0129	131452	146247	737.1	348
BUSCOfEOG7MWH87	Duplicated	DR_scaffold_0163	35115	46746	821.1	581
BUSCOfEOG7DC2DF	Duplicated	DR_scaffold_0006	110435	122281	975	533
BUSCOfEOG73JM5X	Duplicated	DR_scaffold_0077	93070	103849	342.2	273
BUSCOfEOG7X6M9G	Duplicated	DR_scaffold_0032	17717	28559	612.8	277
BUSCOfEOG77DJGG	Duplicated	DR_scaffold_0008	323407	334573	634.8	418
BUSCOfEOG7ZKSKQ	Duplicated	DR_scaffold_0085	68161	79824	1030.7	644
BUSCOfEOG70S7FC	Complete	DR_scaffold_0032	28514	40035	759.9	486
BUSCOfEOG7G4QPG	Duplicated	DR_scaffold_0009	387464	399620	1271.9	803
BUSCOfEOG7JMGRN	Complete	DR_scaffold_0348	15716	26006	256.2	201
BUSCOfEOG72NS19	Duplicated	DR_scaffold_0137	97857	108594	484.6	298
BUSCOfEOG7K6Q40	Duplicated	DR_scaffold_0056	19160	30770	761.5	552
BUSCOfEOG7GTTCX	Duplicated	DR_scaffold_0137	139357	150867	873.6	484
BUSCOfEOG78D7Z8	Duplicated	DR_scaffold_0065	82984	93420	252	127
BUSCOfEOG7TJ3V6	Duplicated	DR_scaffold_0127	48814	59701	507	271
BUSCOfEOG76MKMM	Duplicated	DR_scaffold_0012	233640	244390	431.8	289
BUSCOfEOG7MPRQ0	Duplicated	DR_scaffold_0039	64682	75929	849	472
BUSCOfEOG71VT48	Duplicated	DR_scaffold_0177	1925	12779	688.2	558
BUSCOfEOG7TBCBV	Duplicated	DR_scaffold_0005	467137	478663	213.3	383
BUSCOfEOG7WX0HQ	Duplicated	DR_scaffold_0128	152579	166127	1814.8	1095
BUSCOfEOG7P2Z1R	Duplicated	DR_scaffold_0001	323522	335261	759.1	701
BUSCOfEOG7R83BB	Duplicated	DR_scaffold_0008	362029	373153	640.5	353
BUSCOfEOG779P7W	Duplicated	DR_scaffold_0121	159307	170605	796.1	361
BUSCOfEOG7TJ3TD	Duplicated	DR_scaffold_0047	60962	72181	804.6	419
BUSCOfEOG799312	Duplicated	DR_scaffold_0139	96163	107298	598.2	377
BUSCOfEOG78WM1V	Duplicated	DR_scaffold_0139	98472	109558	928.8	627
BUSCOfEOG7M6DJC	Duplicated	DR_scaffold_0108	98292	121008	1027.6	480
BUSCOfEOG7HHX2C	Duplicated	DR_scaffold_0008	321501	332943	928.5	649
BUSCOfEOG7SJDGM	Duplicated	DR_scaffold_0059	189903	200581	451.9	191
BUSCOfEOG79W9F2	Duplicated	DR_scaffold_0124	112447	123901	828.8	468
BUSCOfEOG77WWR0	Duplicated	DR_scaffold_0037	46613	57173	371.7	233
BUSCOfEOG722JJW	Duplicated	DR_scaffold_0074	104291	115376	481.4	480
BUSCOfEOG7VX94P	Duplicated	DR_scaffold_0041	250036	275525	859.6	656
BUSCOfEOG7TTQMZ	Duplicated	DR_scaffold_0077	46333	57443	112.2	187
BUSCOfEOG7G7KXG	Duplicated	DR_scaffold_0007	179609	192407	1572.2	937
BUSCOfEOG7GXPKT	Duplicated	DR_scaffold_0042	37720	51564	1610	1281
BUSCOfEOG7D5B0C	Duplicated	DR_scaffold_0115	119744	130754	531.9	387
BUSCOfEOG7VB2QZ	Duplicated	DR_scaffold_0268	28821	39744	538.9	372
BUSCOfEOG75XGZ9	Duplicated	DR_scaffold_0013	61255	71765	306.3	218
BUSCOfEOG70W3R5	Complete	DR_scaffold_0149	40097	50895	545.8	283
BUSCOfEOG7KDFKX	Duplicated	DR_scaffold_0017	146921	158481	1013.3	511
BUSCOfEOG7JQBXJ	Duplicated	DR_scaffold_0004	357132	368587	851.9	557
BUSCOfEOG79CZ7K	Duplicated	DR_scaffold_0029	226696	239142	1195.8	1027
BUSCOfEOG7XPZGS	Duplicated	DR_scaffold_0033	19939	31165	610.4	333
BUSCOfEOG7VQJQ2	Complete	DR_scaffold_0055	29419	40231	470.7	378
BUSCOfEOG72ZCPJ	Duplicated	DR_scaffold_0153	64247	76548	1307.5	793
BUSCOfEOG7W9S6F	Duplicated	DR_scaffold_0297	39433	49780	287.9	231
BUSCOfEOG7Z95VF	Duplicated	DR_scaffold_0019	405958	420724	2348.1	1719
BUSCOfEOG799312	Duplicated	DR_scaffold_0128	43191	54326	597.3	377
BUSCOfEOG7FFN53	Duplicated	DR_scaffold_0030	173093	183176	150.4	65
BUSCOfEOG7W15FB	Complete	DR_scaffold_0218	20402	31156	431	237
BUSCOfEOG7DRJDW	Complete	DR_scaffold_0046	127193	138227	673.6	519
BUSCOfEOG7TTQMZ	Duplicated	DR_scaffold_0103	82516	93391	199.6	291
BUSCOfEOG7FR7QW	Duplicated	DR_scaffold_0299	12732	24384	981.7	767
BUSCOfEOG7M98SZ	Duplicated	DR_scaffold_0338	0	6432	149.4	228
BUSCOfEOG7P02TS	Duplicated	DR_scaffold_0029	146840	157745	598.5	347
BUSCOfEOG7MSMZD	Duplicated	DR_scaffold_0083	66533	78418	699.9	763
BUSCOfEOG7966RM	Duplicated	DR_scaffold_0023	215820	230551	1600.5	1329
BUSCOfEOG7WT4D5	Duplicated	DR_scaffold_0002	128922	139312	168.6	162
BUSCOfEOG741ZC1	Duplicated	DR_scaffold_0006	441279	452208	505	411
BUSCOfEOG783N3S	Duplicated	DR_scaffold_0119	2551	15508	1346.6	1055
BUSCOfEOG7KH9V5	Duplicated	DR_scaffold_0043	199396	210420	563.9	364
BUSCOfEOG7G7KXF	Duplicated	DR_scaffold_0096	37670	50794	794	957
BUSCOfEOG7C2RBK	Duplicated	DR_scaffold_0469	3489	14272	464.6	291
BUSCOfEOG7V76G0	Duplicated	DR_scaffold_0002	513480	528757	1864.6	1932
BUSCOfEOG7CZKF1	Complete	DR_scaffold_0114	135207	149707	1405.8	1070
BUSCOfEOG7XSTP7	Duplicated	DR_scaffold_0034	171045	182824	987.7	665
BUSCOfEOG73BVP8	Complete	DR_scaffold_0134	15336	26646	657.6	414
BUSCOfEOG7P2Z2N	Duplicated	DR_scaffold_0252	39855	50904	494.6	438
BUSCOfEOG7V76G6	Duplicated	DR_scaffold_0103	148346	160200	1029.1	738
BUSCOfEOG7SFJ8S	Duplicated	DR_scaffold_0228	24041	35211	426.7	314
BUSCOfEOG7C8GWB	Duplicated	DR_scaffold_0031	252205	263281	395.4	324
BUSCOfEOG7MPRRD	Duplicated	DR_scaffold_0004	264760	276390	798.1	705
BUSCOfEOG75TMNR	Duplicated	DR_scaffold_0684	0	6558	769.2	447
BUSCOfEOG7WHHKZ	Complete	DR_scaffold_0006	150268	161737	550.8	433
BUSCOfEOG7X9GK1	Duplicated	DR_scaffold_0026	164300	174857	374.6	193
BUSCOfEOG7RRFGJ	Duplicated	DR_scaffold_0272	10414	22391	1117.3	700
BUSCOfEOG7DVDN4	Fragmented	DR_scaffold_0031	99658	110969	606.8	393
BUSCOfEOG7T1RKH	Duplicated	DR_scaffold_0011	529986	543780	1607.8	1493
BUSCOfEOG7G7KXQ	Duplicated	DR_scaffold_0024	379108	390709	860.6	554
BUSCOfEOG7WDNF7	Duplicated	DR_scaffold_0072	198415	208909	241.4	206
BUSCOfEOG7ZWDC9	Duplicated	DR_scaffold_0002	640483	651356	480.4	257
BUSCOfEOG77DJK9	Complete	DR_scaffold_0267	47184	57351	160.9	92
BUSCOfEOG722JJW	Duplicated	DR_scaffold_0219	8538	19623	454.5	463
BUSCOfEOG7SN8RW	Duplicated	DR_scaffold_0042	141353	151875	232.6	124
BUSCOfEOG7T7H6C	Complete	DR_scaffold_0004	303281	313643	212.8	163
BUSCOfEOG7PGF3B	Duplicated	DR_scaffold_0329	14498	25011	271.1	152
BUSCOfEOG7WT4C2	Duplicated	DR_scaffold_0425	9326	19856	367.6	239
BUSCOfEOG74TX7R	Duplicated	DR_scaffold_0306	25443	37026	871.5	685
BUSCOfEOG7MD4ZH	Duplicated	DR_scaffold_0179	23550	35289	956.9	871
BUSCOfEOG7GQZ3Z	Duplicated	DR_scaffold_0013	302964	318273	2345.6	1704
BUSCOfEOG7Z0K5V	Duplicated	DR_scaffold_0101	185586	196844	797.9	421
BUSCOfEOG7M98SZ	Duplicated	DR_scaffold_0048	257395	268198	370.8	238
BUSCOfEOG7K9KC2	Duplicated	DR_scaffold_0127	34193	45240	443.9	486
BUSCOfEOG7P02SB	Duplicated	DR_scaffold_0064	50641	62788	1159.6	999
BUSCOfEOG73JM5T	Duplicated	DR_scaffold_0015	20961	31874	429	301
BUSCOfEOG7VHT5Q	Duplicated	DR_scaffold_0067	208311	219333	329.9	616
BUSCOfEOG7SBP20	Duplicated	DR_scaffold_0017	271302	281391	115.5	79
BUSCOfEOG7QRR3J	Duplicated	DR_scaffold_0047	80010	92406	484.4	774
BUSCOfEOG7VMPFD	Fragmented	DR_scaffold_0311	28972	39821	369.7	311
BUSCOfEOG79SF6H	Duplicated	DR_scaffold_0076	5200	16980	350.5	479
BUSCOfEOG72NS06	Complete	DR_scaffold_0361	2403	13761	1047.7	535
BUSCOfEOG7S7SSS	Duplicated	DR_scaffold_0039	92368	102722	271.6	165
BUSCOfEOG7Z95XB	Duplicated	DR_scaffold_0197	42481	53223	290.2	213
BUSCOfEOG7HHX3R	Duplicated	DR_scaffold_0037	117028	128166	609.1	501
BUSCOfEOG7FV415	Complete	DR_scaffold_0049	38141	48925	502.5	245
BUSCOfEOG7H79BV	Complete	DR_scaffold_0198	69802	81523	685.5	512
BUSCOfEOG72NRZG	Duplicated	DR_scaffold_0129	129848	140936	384.3	790
BUSCOfEOG7MSMX8	Duplicated	DR_scaffold_0003	202334	215491	1316.6	907
BUSCOfEOG7TN04C	Duplicated	DR_scaffold_0031	66989	77505	301.4	296
BUSCOfEOG7CCC18	Duplicated	DR_scaffold_0053	26990	39128	796.3	606
BUSCOfEOG761C50	Duplicated	DR_scaffold_0008	263199	274587	738.3	530
BUSCOfEOG735492	Duplicated	DR_scaffold_0475	6116	16644	149.2	119
BUSCOfEOG7D59ZK	Duplicated	DR_scaffold_0035	321938	332882	432.5	315
BUSCOfEOG7TJ3VQ	Duplicated	DR_scaffold_0104	138593	148904	252.7	186
BUSCOfEOG7W6WZX	Complete	DR_scaffold_0009	181036	191779	316.4	261
BUSCOfEOG7V4B9M	Duplicated	DR_scaffold_0028	108906	119652	390.8	294
BUSCOfEOG7T4MWD	Fragmented	DR_scaffold_0005	598437	609457	665.1	349
BUSCOfEOG7P02TS	Duplicated	DR_scaffold_0228	34783	45691	602.3	379
BUSCOfEOG79KPPR	Duplicated	DR_scaffold_0058	158411	172124	1738.9	1444
BUSCOfEOG7MPRRD	Duplicated	DR_scaffold_0035	370992	382623	826.1	706
BUSCOfEOG793BMH	Duplicated	DR_scaffold_0064	254645	265163	372.9	241
BUSCOfEOG71VT57	Complete	DR_scaffold_0061	21202	31851	320.1	158
BUSCOfEOG757D71	Duplicated	DR_scaffold_0031	361817	372724	445.8	352
BUSCOfEOG718KRM	Duplicated	DR_scaffold_0291	4055	14450	155.8	68
BUSCOfEOG77M8ZR	Duplicated	DR_scaffold_0088	6640	17493	589.5	444
BUSCOfEOG71P2N2	Duplicated	DR_scaffold_0034	285825	296725	682.4	350
BUSCOfEOG7HXD37	Complete	DR_scaffold_0097	144735	155039	259.8	146
BUSCOfEOG7NCVD1	Duplicated	DR_scaffold_0021	108538	120097	1009.9	603
BUSCOfEOG7TF7JJ	Duplicated	DR_scaffold_0071	413	12362	1276.1	722
BUSCOfEOG7HHX4K	Duplicated	DR_scaffold_0031	38469	48880	217.6	122
BUSCOfEOG7PGF35	Duplicated	DR_scaffold_0079	22820	33236	263.5	205
BUSCOfEOG7DFXP0	Duplicated	DR_scaffold_0074	235935	247495	827.8	480
BUSCOfEOG7N63WB	Duplicated	DR_scaffold_0028	360188	371957	1434.6	1008
BUSCOfEOG7M98SZ	Duplicated	DR_scaffold_0007	618460	629265	377.1	238
BUSCOfEOG7C5MHX	Duplicated	DR_scaffold_0269	51717	63625	1021.2	766
BUSCOfEOG7KH9Z0	Duplicated	DR_scaffold_0215	13094	23951	460.4	329
BUSCOfEOG7XSTQT	Duplicated	DR_scaffold_0077	137516	148691	883.2	542
BUSCOfEOG7TQVCM	Duplicated	DR_scaffold_0086	80648	91211	195.5	132
BUSCOfEOG7Q5HPM	Duplicated	DR_scaffold_0064	241388	253481	726.2	795
BUSCOfEOG7MH16T	Duplicated	DR_scaffold_0294	0	9945	611.1	412
BUSCOfEOG72VHFD	Duplicated	DR_scaffold_0043	32215	44765	1181.9	950
BUSCOfEOG78M09C	Duplicated	DR_scaffold_0053	251762	264130	829.3	746
BUSCOfEOG7KH9T3	Duplicated	DR_scaffold_0064	74653	87406	881.1	904
BUSCOfEOG7G1VFR	Complete	DR_scaffold_0020	109154	121373	1202.1	879
BUSCOfEOG7P2Z35	Duplicated	DR_scaffold_0019	386446	397327	499.2	323
BUSCOfEOG7T4MTQ	Complete	DR_scaffold_0098	198066	213267	1559.9	1237
BUSCOfEOG706113	Complete	DR_scaffold_0046	76375	88127	744.4	543
BUSCOfEOG71VT48	Duplicated	DR_scaffold_0120	24604	35455	687.1	491
BUSCOfEOG79W9HQ	Duplicated	DR_scaffold_0035	278731	289281	360.1	184
BUSCOfEOG7K9KD0	Fragmented	DR_scaffold_0108	111894	123787	926.5	824
BUSCOfEOG75J0WF	Fragmented	DR_scaffold_0013	391970	404435	573.6	385
BUSCOfEOG71GB6Z	Duplicated	DR_scaffold_0052	122408	132899	265.7	158
BUSCOfEOG7RNK7W	Duplicated	DR_scaffold_0141	117446	128951	811.5	611
BUSCOfEOG77HDQJ	Duplicated	DR_scaffold_0022	376054	387660	751.7	519
BUSCOfEOG7KSXJ1	Duplicated	DR_scaffold_0129	66226	77892	449.1	580
BUSCOfEOG7J44G9	Duplicated	DR_scaffold_0134	97475	108900	963	791
BUSCOfEOG7PCJTH	Duplicated	DR_scaffold_0173	24820	35716	444.6	269
BUSCOfEOG7GJ6NN	Complete	DR_scaffold_0002	363789	376019	1012.3	588
BUSCOfEOG73JM5N	Duplicated	DR_scaffold_0180	36708	47265	363.4	320
BUSCOfEOG7K6Q3H	Complete	DR_scaffold_0030	134756	146396	732	675
BUSCOfEOG786HC2	Duplicated	DR_scaffold_0119	65386	76870	750.9	581
BUSCOfEOG7KM623	Duplicated	DR_scaffold_0061	105697	121153	2270.9	1791
BUSCOfEOG7CVQ6R	Duplicated	DR_scaffold_0020	204111	215280	701.9	492
BUSCOfEOG7WQ83P	Complete	DR_scaffold_0227	37961	48980	596.5	289
BUSCOfEOG7SBNZS	Duplicated	DR_scaffold_0040	207708	218784	595.5	372
BUSCOfEOG7TF7MB	Fragmented	DR_scaffold_0006	191112	202526	318.6	243
BUSCOfEOG7SJDGT	Duplicated	DR_scaffold_0030	377344	388085	332	181
BUSCOfEOG7BCNMN	Duplicated	DR_scaffold_0003	729681	740946	928.6	907
BUSCOfEOG70KH18	Duplicated	DR_scaffold_0052	81048	91289	280.2	328
BUSCOfEOG7DC2DB	Complete	DR_scaffold_0015	193778	205460	923.4	638
BUSCOfEOG7HTHR9	Duplicated	DR_scaffold_0177	30794	43416	1051.9	971
BUSCOfEOG71CFZ8	Complete	DR_scaffold_0005	179215	189795	337.9	214
BUSCOfEOG7KM623	Duplicated	DR_scaffold_0002	60403	75864	2273.2	1791
BUSCOfEOG7FBRS6	Complete	DR_scaffold_0005	194801	208361	975.2	1009
BUSCOfEOG7DJSW7	Duplicated	DR_scaffold_0177	64549	76147	643.4	542
BUSCOfEOG7HMS8K	Duplicated	DR_scaffold_0003	785519	797777	1175	720
BUSCOfEOG7TXKT9	Duplicated	DR_scaffold_0131	81829	93037	811.2	568
BUSCOfEOG7VQJP2	Duplicated	DR_scaffold_0017	121345	132886	769.1	541
BUSCOfEOG7P02VP	Duplicated	DR_scaffold_0123	61057	71854	456.8	302
BUSCOfEOG7GN2WM	Duplicated	DR_scaffold_0090	23030	34805	967.4	613
BUSCOfEOG78WM3S	Duplicated	DR_scaffold_0113	71236	81766	308.1	197
BUSCOfEOG7JHMDW	Duplicated	DR_scaffold_0114	21338	33503	1145.2	857
BUSCOfEOG7J70QP	Duplicated	DR_scaffold_0149	77478	88938	752.3	470
BUSCOfEOG71RXTM	Duplicated	DR_scaffold_0055	176848	188552	618.9	601
BUSCOfEOG7M0P2N	Duplicated	DR_scaffold_0190	28292	39220	571.3	298
BUSCOfEOG77HDQJ	Duplicated	DR_scaffold_0211	41662	53274	745.5	536
BUSCOfEOG7JQC0X	Duplicated	DR_scaffold_0018	225793	236198	270.9	150
BUSCOfEOG7WDNCD	Duplicated	DR_scaffold_0185	67556	78275	462	261
BUSCOfEOG7MPRR4	Duplicated	DR_scaffold_0248	39348	50191	438.2	310
BUSCOfEOG7BCNPR	Complete	DR_scaffold_0110	62261	73154	513.7	336
BUSCOfEOG73NGDW	Duplicated	DR_scaffold_0205	75521	86496	416	258
BUSCOfEOG712V7M	Duplicated	DR_scaffold_0055	48806	59464	253.6	208
BUSCOfEOG7V1G2Z	Duplicated	DR_scaffold_0266	33369	44361	328.3	268
BUSCOfEOG7T1RN4	Duplicated	DR_scaffold_0067	114434	126877	1251.8	792
BUSCOfEOG73JM40	Duplicated	DR_scaffold_0095	22743	34481	801	691
BUSCOfEOG7GXPR2	Duplicated	DR_scaffold_0030	8743	19251	276.4	142
BUSCOfEOG7FJH8N	Duplicated	DR_scaffold_0032	203480	215142	789.4	647
BUSCOfEOG7W41MC	Duplicated	DR_scaffold_0036	355781	368483	1138.9	963
BUSCOfEOG7008K9	Complete	DR_scaffold_0009	176754	188497	683.5	552
BUSCOfEOG76MKK1	Duplicated	DR_scaffold_0141	18179	28988	617.2	411
BUSCOfEOG7PZS5Q	Duplicated	DR_scaffold_0002	523423	536489	1423.3	1014
BUSCOfEOG7B3213	Duplicated	DR_scaffold_0149	84981	95349	219.6	162
BUSCOfEOG7M3J7T	Duplicated	DR_scaffold_0219	46767	61403	2173.5	1796
BUSCOfEOG783N3N	Duplicated	DR_scaffold_0007	574791	588813	1489.4	1354
BUSCOfEOG7GBG58	Complete	DR_scaffold_0066	250046	262574	620.6	858
BUSCOfEOG7S4XJ3	Duplicated	DR_scaffold_0084	202874	213709	428.4	203
BUSCOfEOG7PK99N	Duplicated	DR_scaffold_0084	46363	57082	573.3	472
BUSCOfEOG7ZKSKQ	Duplicated	DR_scaffold_0055	202414	214077	1033.1	644
BUSCOfEOG72ZCQF	Duplicated	DR_scaffold_0002	380586	392281	749.6	493
BUSCOfEOG7KDFK4	Complete	DR_scaffold_0035	42791	58386	2242.7	1695
BUSCOfEOG79930X	Complete	DR_scaffold_0005	97208	109279	1191	729
BUSCOfEOG7JMGNQ	Duplicated	DR_scaffold_0041	283909	307900	6184.2	4931
BUSCOfEOG7TF7K9	Duplicated	DR_scaffold_0073	250693	262776	677.9	812
BUSCOfEOG7J9W0C	Duplicated	DR_scaffold_0016	386538	398688	790.9	715
BUSCOfEOG71CFWG	Duplicated	DR_scaffold_0028	250485	261419	187	307
BUSCOfEOG7VDXXJ	Duplicated	DR_scaffold_0041	61793	73136	733.1	1264
BUSCOfEOG7SN8NM	Duplicated	DR_scaffold_0021	74128	85245	466.3	459
BUSCOfEOG7M6DGR	Duplicated	DR_scaffold_0142	84256	97329	1382.3	1049
BUSCOfEOG7DC2G1	Duplicated	DR_scaffold_0006	145288	155996	464.2	405
BUSCOfEOG77DJGT	Duplicated	DR_scaffold_0018	334673	345917	662.5	401
BUSCOfEOG79GTJ1	Duplicated	DR_scaffold_0018	468855	479808	652.5	362
BUSCOfEOG7TJ3T5	Duplicated	DR_scaffold_0131	136840	148074	475.8	373
BUSCOfEOG7QK0P7	Duplicated	DR_scaffold_0005	27479	41831	386	298
BUSCOfEOG7JX3DQ	Duplicated	DR_scaffold_0379	9329	20791	521.7	474
BUSCOfEOG7BP8B9	Complete	DR_scaffold_0139	85544	97159	666.5	627
BUSCOfEOG71RXW4	Duplicated	DR_scaffold_0260	38272	50771	928.6	831
BUSCOfEOG7VTDX5	Duplicated	DR_scaffold_0231	37911	49098	480	414
BUSCOfEOG71RXXP	Duplicated	DR_scaffold_0101	43108	53299	141.6	109
BUSCOfEOG73Z33M	Complete	DR_scaffold_0005	592313	603329	719.1	347
BUSCOfEOG7SN8MR	Duplicated	DR_scaffold_0090	122303	135422	1536.7	1341
BUSCOfEOG7RBZHR	Duplicated	DR_scaffold_0030	235545	249290	1012.4	1089
BUSCOfEOG72890P	Duplicated	DR_scaffold_0106	26853	40745	2141.1	1252
BUSCOfEOG75TMNV	Duplicated	DR_scaffold_0033	356784	368065	531.4	472
BUSCOfEOG7034SQ	Complete	DR_scaffold_0015	192654	203412	552.2	329
BUSCOfEOG7RNKBD	Duplicated	DR_scaffold_0215	21394	32310	440.8	271
BUSCOfEOG7GXPN0	Complete	DR_scaffold_0051	21113	32334	650.4	457
BUSCOfEOG7BGHVT	Complete	DR_scaffold_0013	72414	84069	907.4	495
BUSCOfEOG7FJH92	Complete	DR_scaffold_0061	77338	88371	452.6	341
BUSCOfEOG78WM14	Fragmented	DR_scaffold_0174	49318	62366	801.7	473
BUSCOfEOG79W9FD	Duplicated	DR_scaffold_0139	44960	56840	1050.4	537
BUSCOfEOG7W41M9	Complete	DR_scaffold_0224	49002	61381	1435.7	779
BUSCOfEOG7RBZMZ	Complete	DR_scaffold_0005	119508	130020	298.3	254
BUSCOfEOG7Z95XP	Duplicated	DR_scaffold_0134	99151	109697	318.7	202
BUSCOfEOG7BW0T1	Duplicated	DR_scaffold_0039	341533	354280	1329.8	899
BUSCOfEOG7V4B6Q	Complete	DR_scaffold_0062	252712	268552	3189.6	1638
BUSCOfEOG70CRGK	Complete	DR_scaffold_0009	6032	18344	1463.2	765
BUSCOfEOG7G4QT6	Complete	DR_scaffold_0005	191793	202236	266.6	140
BUSCOfEOG7B05P0	Complete	DR_scaffold_0044	75006	87627	943	744
BUSCOfEOG77WWMR	Duplicated	DR_scaffold_0056	216506	226864	221.5	305
BUSCOfEOG7QC854	Duplicated	DR_scaffold_0056	70627	82359	637.5	618
BUSCOfEOG7MSMZM	Duplicated	DR_scaffold_0103	8300	19511	661.3	353
BUSCOfEOG7SV166	Duplicated	DR_scaffold_0161	20984	32200	812.9	402
BUSCOfEOG7CCC0D	Duplicated	DR_scaffold_0067	88059	101102	2427.3	1659
BUSCOfEOG751NV3	Duplicated	DR_scaffold_0015	215156	225421	131.4	83
BUSCOfEOG776SZ7	Duplicated	DR_scaffold_0069	113612	131031	2983.2	2530
BUSCOfEOG7RFTRP	Duplicated	DR_scaffold_0029	398499	409509	549.7	714
BUSCOfEOG7PZS7V	Duplicated	DR_scaffold_0010	173510	184703	526.8	364
BUSCOfEOG7QC871	Duplicated	DR_scaffold_0025	181398	192387	695.9	464
BUSCOfEOG7WQ84T	Duplicated	DR_scaffold_0008	91637	101997	260.2	159
BUSCOfEOG786HFQ	Duplicated	DR_scaffold_0066	48372	58554	306.1	193
BUSCOfEOG7M3J7T	Duplicated	DR_scaffold_0074	56982	71736	2231.2	1879
BUSCOfEOG74R203	Duplicated	DR_scaffold_0073	200008	212239	1173.9	747
BUSCOfEOG7JHMH0	Duplicated	DR_scaffold_0137	74476	86444	495.8	452
BUSCOfEOG7FV3ZX	Duplicated	DR_scaffold_0014	334126	346282	1589.4	846
BUSCOfEOG73JM6G	Duplicated	DR_scaffold_0031	61885	72434	289.2	189
BUSCOfEOG7XSTP7	Duplicated	DR_scaffold_0067	47453	59232	983.7	666
BUSCOfEOG7XSTQC	Duplicated	DR_scaffold_0006	427208	438746	660.9	479
BUSCOfEOG7PK9BN	Duplicated	DR_scaffold_0017	66839	77351	418.4	181
BUSCOfEOG7FJH8G	Fragmented	DR_scaffold_0051	35111	46831	361.6	248
BUSCOfEOG7NSBD8	Duplicated	DR_scaffold_0134	72292	83296	583.7	385
BUSCOfEOG7HF1X1	Duplicated	DR_scaffold_0304	8766	19281	358.7	280
BUSCOfEOG7XM380	Duplicated	DR_scaffold_0102	14557	26146	788.7	527
BUSCOfEOG779P7X	Duplicated	DR_scaffold_0045	277071	287736	292.1	253
BUSCOfEOG706142	Duplicated	DR_scaffold_0360	8478	18858	202.8	113
BUSCOfEOG79932M	Duplicated	DR_scaffold_0266	6969	17690	337.7	205
BUSCOfEOG77Q571	Duplicated	DR_scaffold_0019	278700	289347	361.7	233
BUSCOfEOG78WM3S	Duplicated	DR_scaffold_0098	106157	116686	315.5	217
BUSCOfEOG7VB2QK	Complete	DR_scaffold_0005	510865	522502	833	663
BUSCOfEOG7HHX2C	Duplicated	DR_scaffold_0014	450081	461523	933.2	654
BUSCOfEOG77DJJM	Duplicated	DR_scaffold_0015	415379	426079	330.9	201
BUSCOfEOG73Z34Z	Duplicated	DR_scaffold_0021	375487	386122	339.1	246
BUSCOfEOG7CCC0Z	Duplicated	DR_scaffold_0155	53647	66311	1117.5	971
BUSCOfEOG7XSTR7	Duplicated	DR_scaffold_0131	39277	51021	579.2	491
BUSCOfEOG72VHFN	Duplicated	DR_scaffold_0061	115992	127807	961.9	682
BUSCOfEOG789CMF	Duplicated	DR_scaffold_0017	64702	76405	865.1	545
BUSCOfEOG722JJC	Fragmented	DR_scaffold_0073	96828	108385	919.4	527
BUSCOfEOG7ZKSQH	Duplicated	DR_scaffold_0012	301986	312366	230.7	147
BUSCOfEOG72RN9W	Duplicated	DR_scaffold_0031	133075	143824	353.7	224
BUSCOfEOG7GXPMZ	Duplicated	DR_scaffold_0053	122892	134223	846.2	439
BUSCOfEOG7X6MB3	Duplicated	DR_scaffold_0039	321224	332258	598.1	454
BUSCOfEOG751NQG	Duplicated	DR_scaffold_0010	226729	238160	891.7	519
BUSCOfEOG7QRR44	Duplicated	DR_scaffold_0153	26883	38214	775.9	443
BUSCOfEOG7WDNB3	Duplicated	DR_scaffold_0002	477735	489144	519.4	984
BUSCOfEOG7CCC10	Duplicated	DR_scaffold_0056	284548	298536	1008.3	928
BUSCOfEOG7W9S4R	Duplicated	DR_scaffold_0114	44910	56562	683.5	499
BUSCOfEOG7P02T6	Duplicated	DR_scaffold_0022	19975	31130	520.2	401
BUSCOfEOG7FR7RC	Duplicated	DR_scaffold_0048	210320	223140	1131.6	837
BUSCOfEOG780RXX	Duplicated	DR_scaffold_0012	33637	44654	411.1	346
BUSCOfEOG7RJQ36	Duplicated	DR_scaffold_0144	8505	19213	377.9	236
BUSCOfEOG7FJH7X	Duplicated	DR_scaffold_0034	129138	142073	2000.3	884
BUSCOfEOG7VTDX5	Duplicated	DR_scaffold_0041	58670	69857	481.3	415
BUSCOfEOG7GQZ45	Duplicated	DR_scaffold_0089	212142	225876	961.5	1043
BUSCOfEOG7T7H3X	Duplicated	DR_scaffold_0205	28568	40481	489.8	307
BUSCOfEOG7CK3H3	Fragmented	DR_scaffold_0020	181474	191731	179.6	240
BUSCOfEOG7M6DGR	Duplicated	DR_scaffold_0134	122552	135625	1394.3	1028
BUSCOfEOG72894C	Duplicated	DR_scaffold_0107	197829	208190	251.6	172
BUSCOfEOG7QVMCR	Duplicated	DR_scaffold_0045	308972	319899	399.9	301
BUSCOfEOG71K6FR	Duplicated	DR_scaffold_0012	432456	443064	348.2	199
BUSCOfEOG7N0CH8	Duplicated	DR_scaffold_0100	188976	199542	238.6	170
BUSCOfEOG7TJ3TH	Duplicated	DR_scaffold_0125	152036	163274	480.5	374
BUSCOfEOG70KH18	Duplicated	DR_scaffold_0106	153806	164048	209.8	258
BUSCOfEOG7N0CHT	Duplicated	DR_scaffold_0034	86571	96974	253.4	146
BUSCOfEOG71K6C8	Duplicated	DR_scaffold_0228	3813	15263	723	439
BUSCOfEOG7K0ZQ9	Duplicated	DR_scaffold_0162	108501	119199	463.5	306
BUSCOfEOG7K3TW2	Duplicated	DR_scaffold_0008	214191	225454	555.9	407
BUSCOfEOG79W9GP	Duplicated	DR_scaffold_0009	541823	552733	424.5	246
BUSCOfEOG73V6VZ	Duplicated	DR_scaffold_0193	6760	17940	687.1	471
BUSCOfEOG75XGVQ	Duplicated	DR_scaffold_0127	141524	154256	1402.2	903
BUSCOfEOG7ZPNVK	Duplicated	DR_scaffold_0133	87245	98804	658.5	474
BUSCOfEOG7J70SV	Complete	DR_scaffold_0005	558469	569125	416.6	278
BUSCOfEOG72VHGT	Duplicated	DR_scaffold_0133	113669	124727	734.7	338
BUSCOfEOG7K0ZQ3	Duplicated	DR_scaffold_0039	281638	292926	858.2	452
BUSCOfEOG7SFJ59	Duplicated	DR_scaffold_0006	458478	472738	1518.1	1347
BUSCOfEOG74TX7J	Duplicated	DR_scaffold_0282	20154	32642	1287.5	816
BUSCOfEOG7WDN9S	Duplicated	DR_scaffold_0032	104700	120169	2782.7	1824
BUSCOfEOG790G83	Complete	DR_scaffold_0009	206488	219236	1207.9	821
BUSCOfEOG7NSBBG	Duplicated	DR_scaffold_0180	83350	94452	712.6	583
BUSCOfEOG7327X3	Duplicated	DR_scaffold_0056	217668	230413	966.9	1101
BUSCOfEOG74J9JF	Complete	DR_scaffold_0017	13298	25245	765	428
BUSCOfEOG7NW6NN	Duplicated	DR_scaffold_0012	268209	278922	300.2	150
BUSCOfEOG7GTTD5	Duplicated	DR_scaffold_0157	107006	117627	254.1	195
BUSCOfEOG7NW6K5	Duplicated	DR_scaffold_0007	551355	562719	418.2	390
BUSCOfEOG7J44JS	Duplicated	DR_scaffold_0224	64764	75129	292.7	297
BUSCOfEOG71GB6W	Duplicated	DR_scaffold_0038	34025	44675	314.3	239
BUSCOfEOG76DV1T	Duplicated	DR_scaffold_0016	237790	251100	1007.6	1011
BUSCOfEOG7Q5HQM	Duplicated	DR_scaffold_0121	126708	138478	429.4	320
BUSCOfEOG7VB2RJ	Duplicated	DR_scaffold_0252	27967	39050	465.3	351
BUSCOfEOG7K6Q66	Duplicated	DR_scaffold_0010	273193	283950	449.8	388
BUSCOfEOG72RN6K	Complete	DR_scaffold_0097	147708	160289	738.7	706
BUSCOfEOG7TJ3V6	Duplicated	DR_scaffold_0035	82022	92909	505.2	271
BUSCOfEOG78WM31	Duplicated	DR_scaffold_0082	192445	203281	387.2	329
BUSCOfEOG7DZ8V4	Duplicated	DR_scaffold_0151	101358	112934	710.7	395
BUSCOfEOG7VQJNP	Duplicated	DR_scaffold_0034	126211	138075	993.7	689
BUSCOfEOG7RBZK3	Duplicated	DR_scaffold_0015	43503	54285	524.6	378
BUSCOfEOG75F4P2	Duplicated	DR_scaffold_0002	301517	312566	573.6	513
BUSCOfEOG7D2FRW	Duplicated	DR_scaffold_0091	145014	157759	985.2	824
BUSCOfEOG776SZ7	Duplicated	DR_scaffold_0018	348604	366117	2958.6	2468
BUSCOfEOG7TF7MB	Fragmented	DR_scaffold_0083	74847	86410	406.1	282
BUSCOfEOG7K3TW0	Duplicated	DR_scaffold_0062	140965	152029	612.5	459
BUSCOfEOG7HB5K9	Duplicated	DR_scaffold_0002	180721	192487	672.5	513
BUSCOfEOG7M3J7N	Duplicated	DR_scaffold_0080	71760	85169	1354.7	1065
BUSCOfEOG7FZ06K	Duplicated	DR_scaffold_0027	278886	291937	1812.6	1767
BUSCOfEOG7CK3JD	Duplicated	DR_scaffold_0223	64634	75427	383.3	251
BUSCOfEOG73NGGZ	Duplicated	DR_scaffold_0329	15466	25685	190.5	112
BUSCOfEOG71K6BJ	Duplicated	DR_scaffold_0008	468968	480717	804.2	598
BUSCOfEOG7V76HM	Duplicated	DR_scaffold_0190	47816	58499	404.4	304
BUSCOfEOG7FZ07M	Duplicated	DR_scaffold_0037	50885	62336	1083.4	446
BUSCOfEOG783N5X	Duplicated	DR_scaffold_0043	87551	99052	604.8	419
BUSCOfEOG715QCD	Duplicated	DR_scaffold_0142	88425	102001	1984.3	1424
BUSCOfEOG78D7Z8	Duplicated	DR_scaffold_0090	106283	116720	252	127
BUSCOfEOG7HXD2Z	Duplicated	DR_scaffold_0001	154736	165483	413.4	263
BUSCOfEOG7Z0K74	Duplicated	DR_scaffold_0137	116701	127582	423.1	269
BUSCOfEOG7KH9Z0	Duplicated	DR_scaffold_0248	35989	46849	456.8	331
BUSCOfEOG7W41MC	Duplicated	DR_scaffold_0059	167601	180306	1134	983
BUSCOfEOG77DJGG	Duplicated	DR_scaffold_0014	451987	463153	635	418
BUSCOfEOG7DC2G1	Duplicated	DR_scaffold_0083	120961	131669	479.3	477
BUSCOfEOG7B05NZ	Duplicated	DR_scaffold_0060	106817	118635	881.1	514
BUSCOfEOG75B8DM	Duplicated	DR_scaffold_0061	259423	273013	1718.1	1181
BUSCOfEOG7GXPPN	Duplicated	DR_scaffold_0297	32641	43323	504.1	334
BUSCOfEOG7F7WJ5	Duplicated	DR_scaffold_0024	101381	114857	1545.6	1065
BUSCOfEOG7FBRWV	Duplicated	DR_scaffold_0076	24250	34602	171.4	114
BUSCOfEOG712V6Z	Duplicated	DR_scaffold_0134	10834	21548	454	239
BUSCOfEOG7HB5K7	Duplicated	DR_scaffold_0198	61634	73040	470.6	416
BUSCOfEOG78SQSK	Duplicated	DR_scaffold_0026	112944	125292	1208.1	773
BUSCOfEOG73FQW6	Duplicated	DR_scaffold_0219	25261	36856	1003.6	891
BUSCOfEOG7V1G0D	Duplicated	DR_scaffold_0472	5184	16842	910	534
BUSCOfEOG7647B5	Complete	DR_scaffold_0046	157896	172788	1425.4	695
BUSCOfEOG783N68	Duplicated	DR_scaffold_0016	383468	394881	559	474
BUSCOfEOG77DJF5	Duplicated	DR_scaffold_0226	28087	41443	1237.2	957
BUSCOfEOG7MD52F	Duplicated	DR_scaffold_0033	245884	256725	295.4	278
BUSCOfEOG7SJDGJ	Duplicated	DR_scaffold_0084	57661	68241	312.8	215
BUSCOfEOG7XPZJ6	Duplicated	DR_scaffold_0020	0	9286	399.5	244
BUSCOfEOG7ZPNWZ	Duplicated	DR_scaffold_0076	60592	71134	405	392
BUSCOfEOG79SF6H	Duplicated	DR_scaffold_0222	34695	44868	70.3	292
BUSCOfEOG7ZD251	Duplicated	DR_scaffold_0100	92560	103814	494.9	341
BUSCOfEOG7KDFPN	Duplicated	DR_scaffold_0007	80045	90584	288.3	220
BUSCOfEOG744TK7	Duplicated	DR_scaffold_0118	114420	125643	742.8	471
BUSCOfEOG7SFJ58	Complete	DR_scaffold_0216	35543	48618	1692.2	1065
BUSCOfEOG7W41NN	Duplicated	DR_scaffold_0388	11816	22509	397.2	306
BUSCOfEOG7MD51P	Duplicated	DR_scaffold_0113	95890	106508	382.6	268
BUSCOfEOG76MKJK	Duplicated	DR_scaffold_0050	55601	66676	583.6	421
BUSCOfEOG78SQSK	Duplicated	DR_scaffold_0082	152478	164836	1207.3	775
BUSCOfEOG75TMNR	Duplicated	DR_scaffold_0490	0	9132	397.8	358
BUSCOfEOG7VTDXX	Duplicated	DR_scaffold_0056	136876	147806	665.5	351
BUSCOfEOG7JX3CZ	Duplicated	DR_scaffold_0101	61750	73346	690.8	474
BUSCOfEOG7FNCHR	Duplicated	DR_scaffold_0054	295286	306708	744.7	489
BUSCOfEOG7ZKSMC	Duplicated	DR_scaffold_0107	52295	63924	1012.8	504
BUSCOfEOG7R2BVR	Duplicated	DR_scaffold_0272	46506	57774	410.6	482
BUSCOfEOG7CK3KJ	Duplicated	DR_scaffold_0011	13238	23651	249.7	189
BUSCOfEOG7NGQMX	Complete	DR_scaffold_0077	226223	237559	696.9	473
BUSCOfEOG7K0ZQ3	Duplicated	DR_scaffold_0016	288292	299110	250.5	311
BUSCOfEOG7PK977	Duplicated	DR_scaffold_0099	170643	182076	525.5	654
BUSCOfEOG7RV9S0	Duplicated	DR_scaffold_0040	112712	123618	662.3	335
BUSCOfEOG751NSQ	Duplicated	DR_scaffold_0757	0	6065	217.1	136
BUSCOfEOG7VHT8Z	Duplicated	DR_scaffold_0103	31887	42159	197.4	303
BUSCOfEOG7PS1RV	Duplicated	DR_scaffold_0035	98356	109150	575.3	311
BUSCOfEOG79CZ8V	Complete	DR_scaffold_0015	198534	209467	417.5	295
BUSCOfEOG744TMD	Duplicated	DR_scaffold_0062	51176	61772	475.5	397
BUSCOfEOG7X3R3C	Duplicated	DR_scaffold_0139	106804	116980	170.6	116
BUSCOfEOG7SN8PR	Duplicated	DR_scaffold_0103	118496	129299	465.4	331
BUSCOfEOG72G1H6	Duplicated	DR_scaffold_0187	61163	89595	1744.9	1021
BUSCOfEOG7SBNXT	Duplicated	DR_scaffold_0104	155775	167636	831.7	882
BUSCOfEOG7GTTG0	Duplicated	DR_scaffold_0065	14330	24998	368.2	252
BUSCOfEOG7DZ8V4	Duplicated	DR_scaffold_0098	29687	41274	969.2	496
BUSCOfEOG725DVD	Duplicated	DR_scaffold_0055	50198	61695	808	513
BUSCOfEOG70KH0F	Duplicated	DR_scaffold_0177	89082	100114	604	375
BUSCOfEOG7034TC	Duplicated	DR_scaffold_0068	242471	253977	294	301
BUSCOfEOG793BMH	Duplicated	DR_scaffold_0302	8160	18549	278.2	205
BUSCOfEOG71RXT9	Duplicated	DR_scaffold_0059	44892	57160	1122.3	800
BUSCOfEOG780RVR	Duplicated	DR_scaffold_0337	26252	39179	1683.7	1014
BUSCOfEOG7P5T9P	Complete	DR_scaffold_0044	92330	103358	786.7	539
BUSCOfEOG73BVR6	Duplicated	DR_scaffold_0311	28080	38502	179.8	123
BUSCOfEOG7PCJT9	Duplicated	DR_scaffold_0122	158232	169452	611.7	443
BUSCOfEOG71K6CX	Duplicated	DR_scaffold_0127	138061	149976	678.9	633
BUSCOfEOG741ZD8	Duplicated	DR_scaffold_0036	324752	335490	393.6	231
BUSCOfEOG7K9KD3	Duplicated	DR_scaffold_0017	439627	451213	652.3	500
BUSCOfEOG7P5TBG	Duplicated	DR_scaffold_0252	36751	50856	832.3	932
BUSCOfEOG715QG8	Duplicated	DR_scaffold_0145	85445	96078	323.4	268
BUSCOfEOG7SFJ5S	Duplicated	DR_scaffold_0178	42499	53702	575.1	539
BUSCOfEOG7J70QG	Duplicated	DR_scaffold_0152	104348	115910	1043.6	574
BUSCOfEOG79KPR7	Duplicated	DR_scaffold_0057	217935	228982	594.6	322
BUSCOfEOG7WMCVV	Duplicated	DR_scaffold_0008	476228	487148	416.7	335
BUSCOfEOG73BVNX	Complete	DR_scaffold_0046	299803	311590	936.9	604
BUSCOfEOG7ZWDC9	Duplicated	DR_scaffold_0016	361730	372600	481.3	257
BUSCOfEOG7XDBQN	Duplicated	DR_scaffold_0007	611431	622873	670.6	486
BUSCOfEOG7D867D	Duplicated	DR_scaffold_0146	80747	91553	584	391
BUSCOfEOG78H45S	Complete	DR_scaffold_0013	114721	125779	539.5	303
BUSCOfEOG7DNP5M	Duplicated	DR_scaffold_0040	71961	82494	392.7	296
BUSCOfEOG7TTQKB	Duplicated	DR_scaffold_0002	700464	711481	569.6	253
BUSCOfEOG7WDNB3	Duplicated	DR_scaffold_0017	267063	279168	1223.3	1266
BUSCOfEOG7034TC	Duplicated	DR_scaffold_0266	54968	66163	601.1	367
BUSCOfEOG79GTFQ	Duplicated	DR_scaffold_0084	223222	236996	1601.7	1248
BUSCOfEOG7WQ856	Duplicated	DR_scaffold_0027	197659	207978	238.8	249
BUSCOfEOG77DJH3	Duplicated	DR_scaffold_0075	111398	121988	394.9	257
BUSCOfEOG76QFST	Duplicated	DR_scaffold_0011	439129	450637	575.6	389
BUSCOfEOG7ZD27J	Duplicated	DR_scaffold_0082	177433	187917	235.8	134
BUSCOfEOG7034T9	Duplicated	DR_scaffold_0003	748070	759747	649	506
BUSCOfEOG7ZGXCZ	Duplicated	DR_scaffold_0011	191191	202408	680	400
BUSCOfEOG7TTQH0	Duplicated	DR_scaffold_0054	231018	246153	1318.7	1298
BUSCOfEOG7S7SQS	Duplicated	DR_scaffold_0019	356348	372283	625.9	594
BUSCOfEOG7HB5M4	Duplicated	DR_scaffold_0031	269537	280884	705.5	402
BUSCOfEOG7N0CH8	Duplicated	DR_scaffold_0084	59546	70112	235.6	170
BUSCOfEOG786HCW	Duplicated	DR_scaffold_0078	180821	192217	868.3	519
BUSCOfEOG76TB15	Complete	DR_scaffold_0216	18886	39525	972.5	740
BUSCOfEOG7C8GSW	Duplicated	DR_scaffold_0209	7673	18659	679.1	329
BUSCOfEOG7W41P8	Duplicated	DR_scaffold_0352	6896	18086	461.5	382
BUSCOfEOG76QFTN	Duplicated	DR_scaffold_0013	159861	170835	528.6	300
BUSCOfEOG74N5S1	Duplicated	DR_scaffold_0078	153078	198323	817.8	735
BUSCOfEOG76TB2T	Complete	DR_scaffold_0006	545934	556659	370.6	214
BUSCOfEOG7G4QSH	Duplicated	DR_scaffold_0342	17525	28112	515.1	347
BUSCOfEOG7W9S51	Duplicated	DR_scaffold_0137	95325	106123	399.8	237
BUSCOfEOG73RBPD	Duplicated	DR_scaffold_0045	112101	122905	344.8	180
BUSCOfEOG76TB4Q	Duplicated	DR_scaffold_0104	82121	92357	196	142
BUSCOfEOG7GXPM5	Complete	DR_scaffold_0110	86443	99355	1411	904
BUSCOfEOG7CK3GC	Duplicated	DR_scaffold_0065	204236	216468	1147.9	753
BUSCOfEOG7SV148	Duplicated	DR_scaffold_0273	12603	24238	941.7	540
BUSCOfEOG7J44MH	Duplicated	DR_scaffold_0002	781461	793546	807	580
BUSCOfEOG7V76FS	Duplicated	DR_scaffold_0032	137556	149237	872.4	645
BUSCOfEOG7CG77Z	Complete	DR_scaffold_0236	20400	32088	1118.8	623
BUSCOfEOG757D9B	Duplicated	DR_scaffold_0010	274550	284977	152.3	114
BUSCOfEOG74XSH8	Duplicated	DR_scaffold_0013	372918	384462	655.2	461
BUSCOfEOG7SJDFS	Duplicated	DR_scaffold_0143	67485	78708	449.1	348
BUSCOfEOG73RBPD	Duplicated	DR_scaffold_0060	50300	61103	344.8	179
BUSCOfEOG7B05QM	Duplicated	DR_scaffold_0170	190	11469	628.4	402
BUSCOfEOG7GXPPZ	Duplicated	DR_scaffold_0001	764023	774631	373.3	315
BUSCOfEOG7GBG70	Duplicated	DR_scaffold_0250	17777	28837	704.5	373
BUSCOfEOG761C34	Duplicated	DR_scaffold_0049	272011	284561	1260.7	836
BUSCOfEOG7DJSVM	Duplicated	DR_scaffold_0022	236238	248377	1374.1	865
BUSCOfEOG7W9S33	Complete	DR_scaffold_0044	291807	304599	1546.4	1069
BUSCOfEOG7CK3JD	Duplicated	DR_scaffold_0179	74269	85062	382.6	251
BUSCOfEOG7G7KXQ	Duplicated	DR_scaffold_0054	0	8327	813.2	531
BUSCOfEOG7KQ2BG	Duplicated	DR_scaffold_0075	108055	120218	992.8	680
BUSCOfEOG779P7X	Duplicated	DR_scaffold_0174	100425	111090	294	254
BUSCOfEOG7FR7R3	Duplicated	DR_scaffold_0035	187759	200749	1771.7	1058
BUSCOfEOG7D2FRW	Duplicated	DR_scaffold_0007	503458	516203	995.4	829
BUSCOfEOG7J44H4	Duplicated	DR_scaffold_0079	38003	68217	874.5	587
BUSCOfEOG7F51DX	Duplicated	DR_scaffold_0099	81961	92345	242.2	144
BUSCOfEOG73Z333	Duplicated	DR_scaffold_0025	56712	69432	1400.9	974
BUSCOfEOG7SJDGJ	Duplicated	DR_scaffold_0100	190848	201427	347.3	215
BUSCOfEOG7MPRRK	Duplicated	DR_scaffold_0177	43579	54336	509.1	339
BUSCOfEOG79932M	Duplicated	DR_scaffold_0031	265042	275765	345.2	210
BUSCOfEOG7HHX51	Duplicated	DR_scaffold_0170	45738	56445	339.9	181
BUSCOfEOG7J1896	Complete	DR_scaffold_0042	131181	143148	828.2	633
BUSCOfEOG7TXKRP	Duplicated	DR_scaffold_0062	124116	135796	944.2	494
BUSCOfEOG75J0WD	Duplicated	DR_scaffold_0275	12696	25766	1838.8	1210
BUSCOfEOG7MKWG6	Duplicated	DR_scaffold_0003	152510	164197	1148.6	692
BUSCOfEOG7Z95VX	Duplicated	DR_scaffold_0112	41685	53382	1172.9	565
BUSCOfEOG7TTQKC	Duplicated	DR_scaffold_0012	218047	228775	370.2	279
BUSCOfEOG71K6D7	Duplicated	DR_scaffold_0035	353806	365171	800.1	417
BUSCOfEOG7TN04K	Duplicated	DR_scaffold_0004	261507	273177	587.2	453
BUSCOfEOG7GQZ45	Duplicated	DR_scaffold_0001	527961	541269	1187.3	1177
BUSCOfEOG7PCJSB	Duplicated	DR_scaffold_0040	170503	182819	1119.2	941
BUSCOfEOG71P2KM	Duplicated	DR_scaffold_0258	21771	33978	1283	648
BUSCOfEOG735483	Duplicated	DR_scaffold_0052	77831	88433	350.1	229
BUSCOfEOG7HHX4K	Duplicated	DR_scaffold_0124	98889	109298	216.4	122
BUSCOfEOG77HDQH	Duplicated	DR_scaffold_0006	535927	546869	636.1	339
BUSCOfEOG741Z9G	Duplicated	DR_scaffold_0014	373581	388414	1221.6	1182
BUSCOfEOG78SQTC	Complete	DR_scaffold_0219	13154	26675	560	443
BUSCOfEOG7ZWDCC	Duplicated	DR_scaffold_0083	175627	186936	561.2	417
BUSCOfEOG7XDBRV	Duplicated	DR_scaffold_0032	311261	322289	634.8	336
BUSCOfEOG7N0CDH	Duplicated	DR_scaffold_0110	9317	20954	1102.7	547
BUSCOfEOG7SR4ZT	Fragmented	DR_scaffold_0156	75526	85834	203.3	129
BUSCOfEOG74N5VT	Duplicated	DR_scaffold_0019	44911	56242	171.6	188
BUSCOfEOG7J44KB	Duplicated	DR_scaffold_0078	147514	158377	392.1	314
BUSCOfEOG7QC87H	Duplicated	DR_scaffold_0041	154718	165477	355.7	203
BUSCOfEOG773XQR	Duplicated	DR_scaffold_0026	22716	34890	1152	651
BUSCOfEOG7KQ2CK	Duplicated	DR_scaffold_0024	403203	413412	290.2	276
BUSCOfEOG7T1RKK	Duplicated	DR_scaffold_0024	130518	143878	1067.4	1216
BUSCOfEOG7X3R31	Complete	DR_scaffold_0004	383032	393992	451.2	263
BUSCOfEOG79KPPM	Duplicated	DR_scaffold_0100	5741	19783	2146.1	1564
BUSCOfEOG7GTTDX	Duplicated	DR_scaffold_0006	87972	98631	350.5	262
BUSCOfEOG779P6J	Duplicated	DR_scaffold_0028	296753	309209	518.3	796
BUSCOfEOG718KPK	Duplicated	DR_scaffold_0032	186484	197608	925.7	463
BUSCOfEOG7966R8	Duplicated	DR_scaffold_0012	16395	28159	939.1	559
BUSCOfEOG7CK3G4	Duplicated	DR_scaffold_0063	195990	213849	2138	1404
BUSCOfEOG7SV148	Duplicated	DR_scaffold_0015	340820	352455	939.9	569
BUSCOfEOG751NSD	Duplicated	DR_scaffold_0048	133247	144798	745	502
BUSCOfEOG71CFZH	Duplicated	DR_scaffold_0174	12840	23210	320	185
BUSCOfEOG7V1G0D	Duplicated	DR_scaffold_0212	27805	39469	913.5	534
BUSCOfEOG7PS1RB	Duplicated	DR_scaffold_0202	42581	76849	307.4	272
BUSCOfEOG7G1VFV	Duplicated	DR_scaffold_0004	53080	64989	1206.1	580
BUSCOfEOG77DJHZ	Duplicated	DR_scaffold_0057	26817	38340	726.3	493
BUSCOfEOG70610P	Duplicated	DR_scaffold_0001	546278	557722	785.7	717
BUSCOfEOG7C8GT4	Duplicated	DR_scaffold_0135	112621	123214	353.8	249
BUSCOfEOG7QNVZZ	Duplicated	DR_scaffold_0322	21818	32514	429.1	301
BUSCOfEOG72G1GK	Duplicated	DR_scaffold_0033	225765	238277	1520.6	795
BUSCOfEOG7GQZ4F	Complete	DR_scaffold_0089	115361	127553	1206.8	654
BUSCOfEOG7G4QPR	Duplicated	DR_scaffold_0001	264246	276405	982.3	655
BUSCOfEOG7BW0T0	Duplicated	DR_scaffold_0001	246123	259934	1796	1138
BUSCOfEOG7DFXNZ	Duplicated	DR_scaffold_0048	40442	52120	693.5	443
BUSCOfEOG7SN8N7	Duplicated	DR_scaffold_0231	35437	47191	967.8	629
BUSCOfEOG75XGVN	Duplicated	DR_scaffold_0221	47679	59199	982.4	556
BUSCOfEOG7PK96V	Duplicated	DR_scaffold_0144	73063	90529	4916.4	2349
BUSCOfEOG7TJ3T5	Duplicated	DR_scaffold_0171	97398	108641	476.2	374
BUSCOfEOG7W9S4R	Duplicated	DR_scaffold_0296	21712	33407	686.1	507
BUSCOfEOG7TN03Q	Duplicated	DR_scaffold_0065	0	7433	358.6	366
BUSCOfEOG7G4QQG	Duplicated	DR_scaffold_0024	127828	158556	755.2	578
BUSCOfEOG72G1JR	Duplicated	DR_scaffold_0052	288260	299674	717.1	575
BUSCOfEOG7CG78C	Duplicated	DR_scaffold_0122	121434	132708	527.8	422
BUSCOfEOG75B8JB	Duplicated	DR_scaffold_0096	101526	112386	444.2	293
BUSCOfEOG747PT4	Duplicated	DR_scaffold_0013	154026	165321	764.5	546
BUSCOfEOG73281W	Duplicated	DR_scaffold_0045	215892	226389	256	158
BUSCOfEOG789CM7	Complete	DR_scaffold_0005	30403	41831	616.4	455
BUSCOfEOG7VMPGS	Complete	DR_scaffold_0168	57354	74493	635.7	374
BUSCOfEOG7FNCGZ	Complete	DR_scaffold_0005	487958	500570	1160.2	755
BUSCOfEOG7Q2NHQ	Duplicated	DR_scaffold_0115	83827	94243	270.5	239
BUSCOfEOG7P2Z3B	Duplicated	DR_scaffold_0032	262087	272815	559.8	304
BUSCOfEOG79PJZ1	Duplicated	DR_scaffold_0052	111040	122650	576.3	451
BUSCOfEOG75XGVN	Duplicated	DR_scaffold_0014	17401	29110	985.1	556
BUSCOfEOG7NW6JR	Duplicated	DR_scaffold_0115	84959	96551	896	673
BUSCOfEOG7X6M8Z	Duplicated	DR_scaffold_0250	15402	26763	410.4	431
BUSCOfEOG7034SB	Duplicated	DR_scaffold_0012	402466	414762	859.1	644
BUSCOfEOG7J44H6	Complete	DR_scaffold_0085	179139	190183	811.3	600
BUSCOfEOG715QCD	Duplicated	DR_scaffold_0134	126771	140347	2002	1424
BUSCOfEOG7VX96V	Duplicated	DR_scaffold_0153	56311	67102	573.7	364
BUSCOfEOG71GB3B	Duplicated	DR_scaffold_0079	28972	77816	891.9	896
BUSCOfEOG77WWMQ	Duplicated	DR_scaffold_0152	64348	79120	2218.2	1512
BUSCOfEOG7DRJBS	Duplicated	DR_scaffold_0060	188065	202408	1666.1	1352
BUSCOfEOG7R5729	Duplicated	DR_scaffold_0030	79027	90502	722.1	497
BUSCOfEOG7JT779	Complete	DR_scaffold_0308	11524	22249	339.8	243
BUSCOfEOG78SQSW	Duplicated	DR_scaffold_0014	30563	41816	818.3	399
BUSCOfEOG79CZ70	Duplicated	DR_scaffold_0008	192315	204765	1277.7	946
BUSCOfEOG7P2Z1R	Duplicated	DR_scaffold_0039	355696	367108	435.5	412
BUSCOfEOG7TJ3SJ	Duplicated	DR_scaffold_0266	2734	14542	886.1	672
BUSCOfEOG73BVPZ	Duplicated	DR_scaffold_0068	56964	67847	335.7	270
BUSCOfEOG7W9S31	Duplicated	DR_scaffold_0045	89420	102434	1455.2	1077
BUSCOfEOG7PK99N	Duplicated	DR_scaffold_0151	90037	100756	566.1	452
BUSCOfEOG7SBP0G	Duplicated	DR_scaffold_0098	7448	18074	323.3	205
BUSCOfEOG751NSN	Duplicated	DR_scaffold_0007	457111	467440	298.4	141
BUSCOfEOG7X3R0Z	Duplicated	DR_scaffold_0004	559242	571652	877.2	716
BUSCOfEOG7H4F3P	Duplicated	DR_scaffold_0002	668114	678509	288.2	554
BUSCOfEOG7FNCGS	Duplicated	DR_scaffold_0168	87787	101120	2236.8	1092
BUSCOfEOG7N63WV	Duplicated	DR_scaffold_0125	0	9947	694	628
BUSCOfEOG7FJH7X	Duplicated	DR_scaffold_0067	2450	15400	1963.2	878
BUSCOfEOG7M6DK3	Duplicated	DR_scaffold_0204	20596	35456	668.4	529
BUSCOfEOG747PV3	Duplicated	DR_scaffold_0084	56480	69264	504.2	326
BUSCOfEOG7KQ2D5	Complete	DR_scaffold_0046	74801	85743	318.3	186
BUSCOfEOG7XDBSF	Duplicated	DR_scaffold_0065	72043	82996	603.8	394
BUSCOfEOG78D7VT	Duplicated	DR_scaffold_0003	40483	52459	987.1	616
BUSCOfEOG7CK3GC	Duplicated	DR_scaffold_0094	56191	68326	950.2	687
BUSCOfEOG77M8ZR	Duplicated	DR_scaffold_0109	134427	145282	569.5	442
BUSCOfEOG76DV31	Duplicated	DR_scaffold_0074	62539	75927	991.9	1089
BUSCOfEOG7FBRTR	Duplicated	DR_scaffold_0234	29419	40252	550.3	395
BUSCOfEOG77T1G6	Duplicated	DR_scaffold_0069	170534	184025	1118.2	781
BUSCOfEOG7XPZGS	Duplicated	DR_scaffold_0112	40028	51254	610.8	333
BUSCOfEOG7HTHTK	Duplicated	DR_scaffold_0067	55781	67292	625.1	482
BUSCOfEOG7Z95XS	Duplicated	DR_scaffold_0016	241958	252164	224.6	272
BUSCOfEOG73JM46	Duplicated	DR_scaffold_0077	96046	108055	1049.3	539
BUSCOfEOG73JM6G	Duplicated	DR_scaffold_0124	75652	86201	289.2	189
BUSCOfEOG7SJDGM	Duplicated	DR_scaffold_0036	378269	388824	352.4	150
BUSCOfEOG7R2BVR	Duplicated	DR_scaffold_0081	207009	218004	415.3	480
BUSCOfEOG7BS4NR	Duplicated	DR_scaffold_0006	258166	268735	344.1	202
BUSCOfEOG7V76FR	Complete	DR_scaffold_0167	91296	102348	662.8	448
BUSCOfEOG72G1KS	Duplicated	DR_scaffold_0015	308618	318938	340.6	201
BUSCOfEOG7B31WW	Complete	DR_scaffold_0087	90310	102097	733.2	506
BUSCOfEOG7ZKSMM	Complete	DR_scaffold_0024	230790	241566	345	539
BUSCOfEOG747PWJ	Duplicated	DR_scaffold_0014	19540	29786	234.6	180
BUSCOfEOG74R21C	Duplicated	DR_scaffold_0046	261742	272119	78.8	451
BUSCOfEOG7M6DJ5	Duplicated	DR_scaffold_0029	400862	412511	802.1	533
BUSCOfEOG71ZPBX	Duplicated	DR_scaffold_0177	89320	100114	321.8	326
BUSCOfEOG7RNK98	Duplicated	DR_scaffold_0009	409034	420254	616.7	362
BUSCOfEOG7HMSB6	Duplicated	DR_scaffold_0053	241351	252414	381.7	355
BUSCOfEOG7BS4JW	Duplicated	DR_scaffold_0125	130845	143172	917.6	996
BUSCOfEOG75J0WD	Duplicated	DR_scaffold_0244	34494	47567	1776.6	1146
BUSCOfEOG7Z3FDQ	Duplicated	DR_scaffold_0015	28629	39600	514	486
BUSCOfEOG793BHK	Duplicated	DR_scaffold_0040	240221	251357	1131	530
BUSCOfEOG78M09B	Duplicated	DR_scaffold_0056	269900	282898	1291.6	1101
BUSCOfEOG7QC85Z	Duplicated	DR_scaffold_0080	218036	228993	481.2	311
BUSCOfEOG7RJQ0M	Duplicated	DR_scaffold_0249	42232	56491	2086.6	1943
BUSCOfEOG7X3R34	Duplicated	DR_scaffold_0057	23112	33861	267.9	234
BUSCOfEOG79CZ7K	Duplicated	DR_scaffold_0109	45584	58036	1212.2	1034
BUSCOfEOG7NKKTQ	Duplicated	DR_scaffold_0065	146247	158760	1313.9	796
BUSCOfEOG7HQNM2	Complete	DR_scaffold_0009	286299	296888	293	184
BUSCOfEOG7GXPKV	Duplicated	DR_scaffold_0065	28638	43379	1795.4	1355
BUSCOfEOG7RFTTM	Duplicated	DR_scaffold_0200	45577	56920	646.5	485
BUSCOfEOG7M98QZ	Duplicated	DR_scaffold_0085	3333	15350	1499.6	661
BUSCOfEOG7JQC0X	Duplicated	DR_scaffold_0048	20794	31368	270.2	150
BUSCOfEOG7PZS5P	Duplicated	DR_scaffold_0012	411336	426189	1645.8	1109
BUSCOfEOG7H1JV1	Duplicated	DR_scaffold_0002	401324	413726	1301.9	964
BUSCOfEOG7RV9QF	Fragmented	DR_scaffold_0033	66498	120355	823.5	659
BUSCOfEOG7CCC3Q	Complete	DR_scaffold_0002	710051	721481	542.2	391
BUSCOfEOG7K0ZQ3	Duplicated	DR_scaffold_0001	250531	261804	856.2	448
BUSCOfEOG7QK0MM	Fragmented	DR_scaffold_0019	161629	178402	2096.1	1341
BUSCOfEOG7J188V	Duplicated	DR_scaffold_0143	79812	90102	172.1	163
BUSCOfEOG7RRFJ7	Duplicated	DR_scaffold_0037	132462	143613	619.3	387
BUSCOfEOG7380HP	Duplicated	DR_scaffold_0137	89888	100889	263.4	232
BUSCOfEOG7PS1RV	Duplicated	DR_scaffold_0127	32499	43293	575.8	311
BUSCOfEOG7TJ3TQ	Duplicated	DR_scaffold_0258	0	10031	444.4	332
BUSCOfEOG754J1G	Duplicated	DR_scaffold_0099	188867	199307	283.2	317
BUSCOfEOG7008JB	Duplicated	DR_scaffold_0132	114743	126553	1075.4	477
BUSCOfEOG783N4B	Complete	DR_scaffold_0087	197510	208874	734.6	429
BUSCOfEOG7SN8R7	Fragmented	DR_scaffold_0068	130094	189157	349.6	402
BUSCOfEOG7NGQKW	Duplicated	DR_scaffold_0025	35898	50268	1923.9	1587
BUSCOfEOG7X6M9G	Duplicated	DR_scaffold_0126	112910	123752	654.7	324
BUSCOfEOG7QK0P7	Duplicated	DR_scaffold_0024	130806	141258	130	369
BUSCOfEOG7DC2FJ	Duplicated	DR_scaffold_0081	192921	203644	396.1	281
BUSCOfEOG7W41P8	Duplicated	DR_scaffold_0039	36903	48093	509.7	406
BUSCOfEOG7K0ZQF	Duplicated	DR_scaffold_0358	1013	11628	409.3	187
BUSCOfEOG7K0ZQF	Duplicated	DR_scaffold_0206	6690	17300	415.1	187
BUSCOfEOG7W6WVP	Duplicated	DR_scaffold_0013	62780	74291	945.6	603
BUSCOfEOG77T1GJ	Duplicated	DR_scaffold_0075	226085	236968	462.8	224
BUSCOfEOG7Z95VX	Duplicated	DR_scaffold_0033	21582	33279	1175.3	564
BUSCOfEOG7W15CT	Duplicated	DR_scaffold_0080	115672	128229	878.2	771
BUSCOfEOG7F2524	Duplicated	DR_scaffold_0004	409690	421588	1257.5	904
BUSCOfEOG7WQ83F	Duplicated	DR_scaffold_0017	250241	261513	485.7	255
BUSCOfEOG7J44H4	Duplicated	DR_scaffold_0019	247664	259412	942.3	610
BUSCOfEOG7KQ2B9	Complete	DR_scaffold_0073	80614	92016	952.8	397
BUSCOfEOG728949	Complete	DR_scaffold_0009	49743	60265	384.1	342
BUSCOfEOG7CRV0F	Duplicated	DR_scaffold_0107	54761	65996	739.4	456
BUSCOfEOG7XH705	Duplicated	DR_scaffold_0040	205511	216804	585.7	496
BUSCOfEOG7G4QR4	Duplicated	DR_scaffold_0170	81339	92988	863.9	493
BUSCOfEOG77HDS9	Duplicated	DR_scaffold_0037	69645	80352	380.2	234
BUSCOfEOG747PX1	Duplicated	DR_scaffold_0119	174117	184493	249.6	127
BUSCOfEOG7X0VRZ	Duplicated	DR_scaffold_0019	280498	291376	686.7	543
BUSCOfEOG7966SK	Duplicated	DR_scaffold_0013	468818	479996	668.3	450
BUSCOfEOG7WDN9S	Duplicated	DR_scaffold_0126	26131	41566	2619.5	1696
BUSCOfEOG7XDBQH	Complete	DR_scaffold_0005	83929	95150	840.1	542
BUSCOfEOG7T1RKK	Duplicated	DR_scaffold_0054	242558	255885	1070	1185
BUSCOfEOG7KSXJ1	Duplicated	DR_scaffold_0130	25137	36846	1078.7	899
BUSCOfEOG73V6WQ	Duplicated	DR_scaffold_0050	41333	52040	375.3	257
BUSCOfEOG7Q8CXK	Complete	DR_scaffold_0373	17873	28739	676.3	535
BUSCOfEOG7BZW5H	Duplicated	DR_scaffold_0100	30102	40358	157.2	84
BUSCOfEOG7SXWFH	Duplicated	DR_scaffold_0058	287857	299707	564.1	529
BUSCOfEOG7GXPKT	Duplicated	DR_scaffold_0254	4643	18362	1637.8	1313
BUSCOfEOG74XSH8	Duplicated	DR_scaffold_0010	454448	465980	650	461
BUSCOfEOG7B31W6	Duplicated	DR_scaffold_0113	12901	29251	2018.2	1753
BUSCOfEOG7C8GV0	Fragmented	DR_scaffold_0014	55633	66504	494.6	247
BUSCOfEOG773XTK	Complete	DR_scaffold_0030	334918	345760	355	195
BUSCOfEOG75QRC9	Duplicated	DR_scaffold_0263	45136	60508	2318.2	1830
BUSCOfEOG7FNCGS	Duplicated	DR_scaffold_0225	48751	62065	2238.9	1084
BUSCOfEOG7X0VRZ	Duplicated	DR_scaffold_0079	4510	15268	694.6	545
BUSCOfEOG7SV173	Duplicated	DR_scaffold_0042	44029	54385	195.3	136
BUSCOfEOG7JDR61	Complete	DR_scaffold_0005	610573	623159	1130.2	812
BUSCOfEOG74FF9N	Duplicated	DR_scaffold_0173	82006	93009	542.4	404
BUSCOfEOG7T1RKQ	Duplicated	DR_scaffold_0011	543508	556279	1347.7	825
BUSCOfEOG7J9W0X	Complete	DR_scaffold_0046	190543	201399	479.7	298
BUSCOfEOG7X6M97	Complete	DR_scaffold_0064	182511	193964	634.9	524
BUSCOfEOG78WM1Q	Duplicated	DR_scaffold_0326	3274	15581	1293	800
BUSCOfEOG7J187V	Duplicated	DR_scaffold_0095	40132	51848	953	665
BUSCOfEOG7TN04K	Duplicated	DR_scaffold_0035	367608	379493	696.1	545
BUSCOfEOG7VHT8Z	Duplicated	DR_scaffold_0078	214952	225224	220.5	324
BUSCOfEOG7HMSB6	Duplicated	DR_scaffold_0019	361473	372397	382.1	355
BUSCOfEOG7VX94P	Duplicated	DR_scaffold_0196	0	21284	854.3	655
BUSCOfEOG7TBCBV	Duplicated	DR_scaffold_0016	451288	462304	646.3	423
BUSCOfEOG74J9H5	Duplicated	DR_scaffold_0012	179353	195950	3749.5	2021
BUSCOfEOG7P8PN5	Duplicated	DR_scaffold_0013	192294	202723	196.4	109
BUSCOfEOG7FJH7Z	Duplicated	DR_scaffold_0214	0	9482	1438.2	864
BUSCOfEOG70PC7F	Duplicated	DR_scaffold_0045	244334	254942	374.5	283
BUSCOfEOG7FFN2S	Complete	DR_scaffold_0087	159451	171151	883.4	644
BUSCOfEOG7W41QC	Duplicated	DR_scaffold_0010	479836	490513	354	210
BUSCOfEOG73RBMM	Duplicated	DR_scaffold_0030	381101	392492	983.5	565
BUSCOfEOG7W9S6F	Duplicated	DR_scaffold_0024	393092	403427	298.4	238
BUSCOfEOG73NGDW	Duplicated	DR_scaffold_0032	296817	308021	415.3	258
BUSCOfEOG7ZKSQH	Duplicated	DR_scaffold_0080	138727	149194	231	148
BUSCOfEOG7DC2FH	Duplicated	DR_scaffold_0098	150191	161057	320.9	341
BUSCOfEOG74BK18	Complete	DR_scaffold_0006	625554	643678	1898.8	1801
BUSCOfEOG780RVR	Duplicated	DR_scaffold_0104	13325	26066	1581.9	973
BUSCOfEOG7P5T91	Complete	DR_scaffold_0015	440023	451354	557.6	403
BUSCOfEOG7QVMCR	Duplicated	DR_scaffold_0257	41124	52048	405	294
BUSCOfEOG7380HP	Duplicated	DR_scaffold_0138	69332	80332	268.3	228
BUSCOfEOG7SBNX9	Complete	DR_scaffold_0176	35958	48064	1018.8	666
BUSCOfEOG7W6WVP	Duplicated	DR_scaffold_0010	149059	160570	954.2	616
BUSCOfEOG7008JM	Duplicated	DR_scaffold_0074	80566	91489	618.7	470
BUSCOfEOG7PCJS1	Duplicated	DR_scaffold_0010	452768	463949	615.4	400
BUSCOfEOG77DJGM	Duplicated	DR_scaffold_0119	175052	186051	507.6	296
BUSCOfEOG7647C5	Complete	DR_scaffold_0007	201104	212441	371.1	364
BUSCOfEOG7NCVC3	Duplicated	DR_scaffold_0044	187998	199630	393.9	591
BUSCOfEOG7GXPMZ	Duplicated	DR_scaffold_0156	9108	20439	845.4	439
BUSCOfEOG7JMGRX	Duplicated	DR_scaffold_0074	135502	146452	409.3	276
BUSCOfEOG754J1G	Duplicated	DR_scaffold_0295	1042	11482	278.3	309
BUSCOfEOG7QG4CT	Duplicated	DR_scaffold_0129	36663	48400	1199.5	722
BUSCOfEOG7W15C7	Duplicated	DR_scaffold_0113	146880	159771	1814.1	1057
BUSCOfEOG7XM38H	Duplicated	DR_scaffold_0123	156089	170553	900.3	575
BUSCOfEOG71GB4M	Duplicated	DR_scaffold_0013	267419	278447	521.4	399
BUSCOfEOG7DJSXQ	Duplicated	DR_scaffold_0026	262273	275771	638.2	297
BUSCOfEOG7G1VHK	Duplicated	DR_scaffold_0003	96017	106976	571.9	344
BUSCOfEOG7380FJ	Duplicated	DR_scaffold_0135	50139	62428	1007.3	1010
BUSCOfEOG7QG4G3	Duplicated	DR_scaffold_0297	44743	55414	325.7	224
BUSCOfEOG7Q8CZ1	Complete	DR_scaffold_0005	707239	718903	807.3	537
BUSCOfEOG780RWX	Duplicated	DR_scaffold_0264	42294	56125	866.6	505
BUSCOfEOG7GXPPN	Duplicated	DR_scaffold_0024	399522	410204	500.5	334
BUSCOfEOG7RFTVM	Duplicated	DR_scaffold_0187	96150	106827	443.9	236
BUSCOfEOG71VT28	Duplicated	DR_scaffold_0014	168403	180738	903.3	750
BUSCOfEOG7SN8MR	Duplicated	DR_scaffold_0065	99001	112120	1527.4	1280
BUSCOfEOG7K9KDQ	Duplicated	DR_scaffold_0063	223240	235861	1139.7	862
BUSCOfEOG7CNZQV	Duplicated	DR_scaffold_0172	57871	69415	948.6	569
BUSCOfEOG7H1JX5	Complete	DR_scaffold_0006	544584	555309	415.5	317
BUSCOfEOG7B8SGP	Duplicated	DR_scaffold_0049	258134	268403	94.7	158
BUSCOfEOG7F2542	Duplicated	DR_scaffold_0005	630936	641673	210.5	306
BUSCOfEOG7B5X6H	Duplicated	DR_scaffold_0146	74756	85889	662.5	630
BUSCOfEOG7380D3	Complete	DR_scaffold_0005	674159	687077	1329.9	1089
BUSCOfEOG72C5BH	Complete	DR_scaffold_0062	197902	208465	411.5	251
BUSCOfEOG7TJ3TD	Duplicated	DR_scaffold_0029	56602	67918	353.3	316
BUSCOfEOG747PSQ	Duplicated	DR_scaffold_0003	262119	274051	931.9	765
BUSCOfEOG76MKK1	Duplicated	DR_scaffold_0268	18327	29136	623.8	388
BUSCOfEOG74N5SR	Duplicated	DR_scaffold_0142	1069	12405	753.2	439
BUSCOfEOG77DJHR	Duplicated	DR_scaffold_0377	0	9007	651.3	541
BUSCOfEOG7Z95VT	Duplicated	DR_scaffold_0001	663675	675458	736	421
BUSCOfEOG7VX96Z	Duplicated	DR_scaffold_0158	89714	101647	415	282
BUSCOfEOG789CMF	Duplicated	DR_scaffold_0066	172930	184624	862.5	545
BUSCOfEOG7W41PG	Duplicated	DR_scaffold_0026	349974	360357	165.8	329
BUSCOfEOG7DJSVT	Duplicated	DR_scaffold_0037	61224	73892	1107.6	789
BUSCOfEOG79GTFQ	Duplicated	DR_scaffold_0100	24092	37937	1590.1	1248
BUSCOfEOG72ZCPN	Duplicated	DR_scaffold_0022	30586	42010	1092.7	770
BUSCOfEOG7TN03Q	Duplicated	DR_scaffold_0090	18950	29741	358.3	361
BUSCOfEOG70PC7F	Duplicated	DR_scaffold_0174	68503	79111	376.2	283
BUSCOfEOG715QG8	Duplicated	DR_scaffold_0004	508092	518723	344	285
BUSCOfEOG72890R	Duplicated	DR_scaffold_0092	131585	149684	1621.8	927
BUSCOfEOG75XGWD	Duplicated	DR_scaffold_0035	92085	103381	630.3	361
BUSCOfEOG7QVMD6	Duplicated	DR_scaffold_0057	10495	21720	528.6	288
BUSCOfEOG7H79BK	Duplicated	DR_scaffold_0047	40192	51952	1067.8	487
BUSCOfEOG7DZ8VC	Fragmented	DR_scaffold_0361	11860	22429	182.4	351
BUSCOfEOG7F2546	Complete	DR_scaffold_0216	23464	34805	881.2	651
BUSCOfEOG71CFVN	Duplicated	DR_scaffold_0012	310019	321703	1179.6	564
BUSCOfEOG7P02T6	Duplicated	DR_scaffold_0125	164630	175783	525.3	401
BUSCOfEOG7PVWXS	Duplicated	DR_scaffold_0083	4043	17576	1760.8	1063
BUSCOfEOG7Z0K7M	Complete	DR_scaffold_0097	200940	211756	507.7	255
BUSCOfEOG77DJGM	Duplicated	DR_scaffold_0169	16154	27197	509.2	297
BUSCOfEOG7JMGNT	Duplicated	DR_scaffold_0014	468882	482175	1492.1	985
BUSCOfEOG77HDQD	Duplicated	DR_scaffold_0012	415318	425716	215.6	142
BUSCOfEOG71VT26	Duplicated	DR_scaffold_0119	69978	84003	2331.8	1438
BUSCOfEOG751NRJ	Complete	DR_scaffold_0087	111274	122659	603.6	494
BUSCOfEOG71CFWK	Duplicated	DR_scaffold_0069	130901	142323	718.5	644
BUSCOfEOG776SZQ	Duplicated	DR_scaffold_0043	47895	61151	1224.2	825
BUSCOfEOG72890R	Duplicated	DR_scaffold_0030	0	12571	1249.9	768
BUSCOfEOG7B8SC7	Duplicated	DR_scaffold_0021	199807	211916	1238.6	743
BUSCOfEOG7WQ83Z	Duplicated	DR_scaffold_0135	59254	70364	560.9	323
BUSCOfEOG77Q57P	Fragmented	DR_scaffold_0093	116016	126878	157	123
BUSCOfEOG7SBP03	Duplicated	DR_scaffold_0052	76084	87148	605	434
BUSCOfEOG7JDR6J	Duplicated	DR_scaffold_0011	220511	231011	532	631
BUSCOfEOG7QZGNM	Duplicated	DR_scaffold_0188	3180	13820	542	343
BUSCOfEOG7QVMD6	Duplicated	DR_scaffold_0040	64828	76068	536.6	288
BUSCOfEOG7N37RH	Duplicated	DR_scaffold_0041	105639	116182	211.6	114
BUSCOfEOG7R2BV4	Duplicated	DR_scaffold_0283	40120	50947	304	346
BUSCOfEOG78D7XD	Duplicated	DR_scaffold_0173	37155	47666	203	144
BUSCOfEOG76MKJ7	Complete	DR_scaffold_0028	317359	328873	571	473
BUSCOfEOG7J9W1K	Duplicated	DR_scaffold_0013	509889	520158	89.2	459
BUSCOfEOG75MW7P	Duplicated	DR_scaffold_0055	230077	240708	284.1	262
BUSCOfEOG7NCVCS	Duplicated	DR_scaffold_0106	109025	120459	900	508
BUSCOfEOG7N63W7	Complete	DR_scaffold_0005	732768	745399	1533	956
BUSCOfEOG7FV40Z	Duplicated	DR_scaffold_0084	84994	95827	530.4	413
BUSCOfEOG79CZ6V	Complete	DR_scaffold_0079	156548	189380	1358.4	907
BUSCOfEOG71ZPC8	Duplicated	DR_scaffold_0057	159633	170436	566.3	390
BUSCOfEOG7DVDQ1	Duplicated	DR_scaffold_0015	22122	32850	353.5	268
BUSCOfEOG74FF8R	Complete	DR_scaffold_0046	261409	273154	1042.6	785
BUSCOfEOG7N63WB	Duplicated	DR_scaffold_0039	8873	20524	1221.6	861
BUSCOfEOG7WQ856	Duplicated	DR_scaffold_0075	247232	257550	235.8	249
BUSCOfEOG786HCM	Duplicated	DR_scaffold_0058	145780	164044	665.2	401
BUSCOfEOG7NSBBG	Duplicated	DR_scaffold_0282	14943	26047	705	585
BUSCOfEOG783N3Q	Duplicated	DR_scaffold_0067	55036	65737	545.3	337
BUSCOfEOG7GBG8F	Duplicated	DR_scaffold_0299	18225	28965	233.7	190
BUSCOfEOG7F7WKM	Duplicated	DR_scaffold_0096	9675	21470	345.4	363
BUSCOfEOG7Z3FFT	Duplicated	DR_scaffold_0367	3505	14575	464.5	284
BUSCOfEOG7SFJ5H	Duplicated	DR_scaffold_0029	26487	37308	543.8	376
BUSCOfEOG7TTQJT	Duplicated	DR_scaffold_0003	714821	726687	503.6	462
BUSCOfEOG79PJXZ	Duplicated	DR_scaffold_0060	223611	236277	1629.6	1333
BUSCOfEOG7Q5HPM	Duplicated	DR_scaffold_0302	0	7622	712.7	776
BUSCOfEOG7SV15N	Duplicated	DR_scaffold_0090	103721	115085	820.3	540
BUSCOfEOG754HXV	Duplicated	DR_scaffold_0080	95552	109316	2163	1183
BUSCOfEOG7BKD38	Fragmented	DR_scaffold_0054	180855	192953	474.5	277
BUSCOfEOG7B5X74	Duplicated	DR_scaffold_0035	297569	308648	542	343
BUSCOfEOG783N5G	Complete	DR_scaffold_0044	117979	128981	655.9	337
BUSCOfEOG7MKWGD	Duplicated	DR_scaffold_0167	71091	82260	708.6	397
BUSCOfEOG7J70QK	Duplicated	DR_scaffold_0003	365894	377538	808.8	558
BUSCOfEOG7TN04C	Duplicated	DR_scaffold_0124	70526	81042	313.4	302
BUSCOfEOG7CVQ76	Duplicated	DR_scaffold_0195	11364	22476	493.1	303
BUSCOfEOG7966RM	Duplicated	DR_scaffold_0129	104542	119193	1571	1308
BUSCOfEOG7Z3FG9	Duplicated	DR_scaffold_0011	155584	166567	504.3	284
BUSCOfEOG7B05RW	Complete	DR_scaffold_0140	66646	76962	192.7	189
BUSCOfEOG7T1RN4	Duplicated	DR_scaffold_0034	233908	246352	1250	791
BUSCOfEOG7H4F5X	Duplicated	DR_scaffold_0003	609251	619708	255.6	218
BUSCOfEOG789CPC	Duplicated	DR_scaffold_0035	24008	34946	410.7	252
BUSCOfEOG7F7WKS	Duplicated	DR_scaffold_0027	225019	239961	1421.2	902
BUSCOfEOG72C57N	Duplicated	DR_scaffold_0068	253414	266521	1462.1	993
BUSCOfEOG7BP8F0	Duplicated	DR_scaffold_0035	227711	238070	314.6	272
BUSCOfEOG7PCJR9	Duplicated	DR_scaffold_0147	15410	28664	1692	1120
BUSCOfEOG7V76HM	Duplicated	DR_scaffold_0023	134424	145107	404.3	304
BUSCOfEOG78M09D	Duplicated	DR_scaffold_0035	231058	244041	1715.2	951
BUSCOfEOG7JQBXD	Complete	DR_scaffold_0044	144659	158228	939.1	760
BUSCOfEOG7PK9B1	Duplicated	DR_scaffold_0042	211849	222741	504.7	346
BUSCOfEOG71K6BJ	Duplicated	DR_scaffold_0108	74575	86323	800.6	585
BUSCOfEOG7380FJ	Duplicated	DR_scaffold_0077	147550	159842	1003.9	1006
BUSCOfEOG70KH0H	Duplicated	DR_scaffold_0266	42066	53456	611.9	428
BUSCOfEOG74R22W	Duplicated	DR_scaffold_0223	42718	53188	275.8	157
BUSCOfEOG7W15C7	Duplicated	DR_scaffold_0098	179721	192602	1821.7	1061
BUSCOfEOG7FFN53	Duplicated	DR_scaffold_0364	3689	13772	146.9	65
BUSCOfEOG7DJSVM	Duplicated	DR_scaffold_0237	5273	17412	1375.7	865
BUSCOfEOG7NW6JS	Complete	DR_scaffold_0074	222351	234196	989.6	834
BUSCOfEOG73RBQC	Duplicated	DR_scaffold_0041	93475	103955	267.5	150
BUSCOfEOG7H4F3P	Duplicated	DR_scaffold_0016	390968	401363	280.5	547
BUSCOfEOG7J70QW	Complete	DR_scaffold_0026	137940	149010	407.7	359
BUSCOfEOG71GB6W	Duplicated	DR_scaffold_0178	5818	16468	316.7	239
BUSCOfEOG7B05NR	Duplicated	DR_scaffold_0021	80171	93839	1721.3	963
BUSCOfEOG7P2Z35	Duplicated	DR_scaffold_0053	217146	228027	492.8	318
BUSCOfEOG72G1KS	Duplicated	DR_scaffold_0136	41104	51442	342.8	201
BUSCOfEOG7DNP6J	Duplicated	DR_scaffold_0143	23289	35071	719.1	514
BUSCOfEOG7X0VT2	Duplicated	DR_scaffold_0039	236870	247956	580.2	330
BUSCOfEOG76X69V	Duplicated	DR_scaffold_0015	216027	226854	466.7	303
BUSCOfEOG7DC2CX	Complete	DR_scaffold_0009	137494	149749	1177.1	917
BUSCOfEOG74BK23	Duplicated	DR_scaffold_0066	150288	163047	1168.3	922
BUSCOfEOG744TJK	Duplicated	DR_scaffold_0158	52834	64867	846.4	847
BUSCOfEOG790G80	Duplicated	DR_scaffold_0109	160281	176835	3921.5	2205
BUSCOfEOG7XSTQT	Duplicated	DR_scaffold_0135	61363	72537	898.7	540
BUSCOfEOG7M6DHG	Duplicated	DR_scaffold_0039	352845	364482	804	558
BUSCOfEOG7XH6ZF	Duplicated	DR_scaffold_0013	472982	485240	1062.7	782
BUSCOfEOG7XM38T	Duplicated	DR_scaffold_0121	141334	151969	285.9	196
BUSCOfEOG7WDNCV	Duplicated	DR_scaffold_0015	261546	272736	836.8	540
BUSCOfEOG73RBQ5	Duplicated	DR_scaffold_0152	63170	73958	357.9	238
BUSCOfEOG77WWNF	Duplicated	DR_scaffold_0008	423982	436335	1418	863
BUSCOfEOG7TTQH0	Duplicated	DR_scaffold_0024	140330	155468	1324.5	1302
BUSCOfEOG7H79F8	Duplicated	DR_scaffold_0001	203362	214298	466.4	369
BUSCOfEOG7N37N0	Duplicated	DR_scaffold_0009	514027	527692	1559.3	1155
BUSCOfEOG77WWNF	Duplicated	DR_scaffold_0108	120140	132772	1475.9	1041
BUSCOfEOG7380GZ	Complete	DR_scaffold_0294	25996	36271	351.1	220
BUSCOfEOG7RBZKK	Complete	DR_scaffold_0155	5487	16428	390.5	327
BUSCOfEOG7FBRW1	Duplicated	DR_scaffold_0053	234388	244825	354.4	153
BUSCOfEOG7SBNXT	Duplicated	DR_scaffold_0204	42086	53947	833.5	880
BUSCOfEOG715QCZ	Duplicated	DR_scaffold_0082	5601	17595	949.4	809
BUSCOfEOG7XSTS0	Complete	DR_scaffold_0009	224253	234915	332.5	209
BUSCOfEOG7F2527	Duplicated	DR_scaffold_0041	191607	206072	1990.2	1571
BUSCOfEOG7TJ3T6	Duplicated	DR_scaffold_0074	30012	41477	869.9	418
BUSCOfEOG7TXKRS	Duplicated	DR_scaffold_0022	252896	264234	698.5	451
BUSCOfEOG7N9059	Duplicated	DR_scaffold_0093	178613	189923	920.8	510
BUSCOfEOG7G1VFV	Duplicated	DR_scaffold_0035	172139	183973	1206.2	579
BUSCOfEOG747PS9	Duplicated	DR_scaffold_0021	149618	163880	1801.3	1350
BUSCOfEOG7QG4CT	Duplicated	DR_scaffold_0023	287753	299490	1197.5	722
BUSCOfEOG70PC9D	Duplicated	DR_scaffold_0098	170435	180803	300	210
BUSCOfEOG7GQZ5S	Complete	DR_scaffold_0005	589706	600735	603.9	327
BUSCOfEOG7ZGXC2	Duplicated	DR_scaffold_0021	292992	304410	693.3	459
BUSCOfEOG7KQ28X	Duplicated	DR_scaffold_0107	0	12083	2608.5	1553
BUSCOfEOG7K0ZQ9	Duplicated	DR_scaffold_0222	2109	12903	444.2	258
BUSCOfEOG7C5MHX	Duplicated	DR_scaffold_0010	75857	87746	1024.2	760
BUSCOfEOG7D2FR2	Duplicated	DR_scaffold_0156	56099	67417	749.3	503
BUSCOfEOG74R21M	Complete	DR_scaffold_0002	250816	263225	959.6	767
BUSCOfEOG7BW0WH	Duplicated	DR_scaffold_0144	6375	17019	405.3	313
BUSCOfEOG79931N	Duplicated	DR_scaffold_0295	0	6937	394.9	273
BUSCOfEOG7647BG	Duplicated	DR_scaffold_0364	7626	19341	886.8	634
BUSCOfEOG7PK97G	Duplicated	DR_scaffold_0226	56768	69568	1217.5	953
BUSCOfEOG7WX0KP	Duplicated	DR_scaffold_0001	632877	643770	502.5	494
BUSCOfEOG7JQBXJ	Duplicated	DR_scaffold_0011	399064	410519	850	557
BUSCOfEOG7MD52F	Duplicated	DR_scaffold_0060	246756	257549	287.1	227
BUSCOfEOG7FJHC6	Duplicated	DR_scaffold_0027	107802	118324	329.1	236
BUSCOfEOG7SFJ59	Duplicated	DR_scaffold_0028	208479	222739	1509.4	1347
BUSCOfEOG7TJ3SF	Duplicated	DR_scaffold_0016	18906	31600	658.3	642
BUSCOfEOG7NCVBW	Duplicated	DR_scaffold_0065	220325	233484	1312.4	905
BUSCOfEOG7NW6JF	Complete	DR_scaffold_0095	149961	164589	1594.9	1029
BUSCOfEOG7VX983	Duplicated	DR_scaffold_0012	452302	462884	216.2	149
BUSCOfEOG7SXWBR	Duplicated	DR_scaffold_0055	62411	77287	1689.2	1152
BUSCOfEOG7PCJRV	Duplicated	DR_scaffold_0214	53078	63485	342.9	429
BUSCOfEOG7NPG2G	Duplicated	DR_scaffold_0075	206172	222594	2458.8	2070
BUSCOfEOG72890P	Duplicated	DR_scaffold_0052	204566	218584	2305.9	1366
BUSCOfEOG7J9W0C	Duplicated	DR_scaffold_0002	663684	675835	814.5	715
BUSCOfEOG74R219	Complete	DR_scaffold_0035	295094	307323	988.2	695
BUSCOfEOG7XH6ZF	Duplicated	DR_scaffold_0010	553870	566129	1067.1	792
BUSCOfEOG7K3TW2	Duplicated	DR_scaffold_0014	338110	349418	576.9	407
BUSCOfEOG7RJQ17	Duplicated	DR_scaffold_0045	186660	198389	634.6	522
BUSCOfEOG73FQW6	Duplicated	DR_scaffold_0074	86843	98438	992.5	846
BUSCOfEOG7VTDZ9	Duplicated	DR_scaffold_0019	322228	333975	1014.6	816
BUSCOfEOG7XWQ0B	Duplicated	DR_scaffold_0152	71320	82079	423.3	229
BUSCOfEOG75MW7X	Duplicated	DR_scaffold_0123	77456	88138	374.9	222
BUSCOfEOG744TMD	Duplicated	DR_scaffold_0017	205904	216500	471.1	394
BUSCOfEOG7G7KZ2	Duplicated	DR_scaffold_0045	156007	167425	575.3	542
BUSCOfEOG7CRV06	Duplicated	DR_scaffold_0004	758086	769635	533.9	447
BUSCOfEOG71ZPB0	Complete	DR_scaffold_0005	614119	625136	581.6	413
BUSCOfEOG7J70QP	Duplicated	DR_scaffold_0122	150379	161812	752.4	469
BUSCOfEOG7NW6K7	Duplicated	DR_scaffold_0030	221714	232952	561.9	435
BUSCOfEOG741Z9S	Fragmented	DR_scaffold_0022	156647	172014	1501.7	1098
BUSCOfEOG79931N	Duplicated	DR_scaffold_0099	183922	194744	396.5	274
BUSCOfEOG7B05QC	Duplicated	DR_scaffold_0144	9607	20844	612.7	389
BUSCOfEOG741ZDG	Duplicated	DR_scaffold_0095	126534	137205	122.7	271
BUSCOfEOG7TQV8N	Duplicated	DR_scaffold_0099	189532	204009	1064.6	683
BUSCOfEOG7RBZJM	Duplicated	DR_scaffold_0105	59882	71572	923.9	760
BUSCOfEOG7RNK8W	Duplicated	DR_scaffold_0056	60242	105663	963.9	457
BUSCOfEOG79GTGW	Duplicated	DR_scaffold_0032	282560	293902	708.6	689
BUSCOfEOG7W41N8	Fragmented	DR_scaffold_0044	205285	217486	1257.6	1071
BUSCOfEOG712V4J	Duplicated	DR_scaffold_0130	68416	88082	4693.7	3085
BUSCOfEOG70W3P6	Duplicated	DR_scaffold_0062	84404	97341	1605.1	1159
BUSCOfEOG70PC83	Duplicated	DR_scaffold_0111	156827	167273	538	530
BUSCOfEOG77DJHZ	Duplicated	DR_scaffold_0040	80922	92445	726.6	493
BUSCOfEOG7GJ6P5	Duplicated	DR_scaffold_0018	325463	336557	693.9	451
BUSCOfEOG77WWPJ	Duplicated	DR_scaffold_0003	637555	648666	541.3	357
BUSCOfEOG7DFXP0	Duplicated	DR_scaffold_0143	113039	124599	828.1	480
BUSCOfEOG7BCNM6	Duplicated	DR_scaffold_0192	42597	55189	1492.3	880
BUSCOfEOG7PZS7F	Duplicated	DR_scaffold_0185	23951	34868	601	407
BUSCOfEOG783N4K	Duplicated	DR_scaffold_0015	46072	58001	1116.1	618
BUSCOfEOG7VB2RC	Duplicated	DR_scaffold_0019	314815	325789	318.5	327
BUSCOfEOG7CVQ6R	Duplicated	DR_scaffold_0021	78468	89637	694.4	496
BUSCOfEOG7TTQKW	Duplicated	DR_scaffold_0137	101938	113446	630	434
BUSCOfEOG7B8SF4	Duplicated	DR_scaffold_0060	113582	124487	367.1	251
BUSCOfEOG741ZBG	Duplicated	DR_scaffold_0174	17721	29083	852.3	469
BUSCOfEOG7TXKT9	Duplicated	DR_scaffold_0171	43205	54413	819.1	596
BUSCOfEOG7M0P18	Duplicated	DR_scaffold_0140	23279	36314	1047.3	1040
BUSCOfEOG7SFJ5H	Duplicated	DR_scaffold_0163	60342	71163	547.2	376
BUSCOfEOG7FJH7Z	Duplicated	DR_scaffold_0095	61702	74403	1443.8	864
BUSCOfEOG783N6S	Duplicated	DR_scaffold_0021	255057	265723	398.8	279
BUSCOfEOG7VMPFD	Fragmented	DR_scaffold_0009	288122	299366	800	546
BUSCOfEOG7MWH5T	Duplicated	DR_scaffold_0043	125395	137409	1085.1	572
BUSCOfEOG7MWH5Z	Duplicated	DR_scaffold_0050	67631	79219	979.4	587
BUSCOfEOG7Z95VF	Duplicated	DR_scaffold_0053	193198	207964	2369.3	1714
BUSCOfEOG7GN2W1	Duplicated	DR_scaffold_0168	0	12421	1882.5	1049
BUSCOfEOG78SQVJ	Duplicated	DR_scaffold_0068	30386	41284	486.7	288
BUSCOfEOG71P2KR	Duplicated	DR_scaffold_0285	3517	15472	1001.2	633
BUSCOfEOG7NCVD1	Duplicated	DR_scaffold_0020	175902	187461	1013.3	595
BUSCOfEOG7WT49D	Duplicated	DR_scaffold_0116	34214	46085	1067.1	789
BUSCOfEOG7V4B7X	Duplicated	DR_scaffold_0007	198595	209398	415.6	355
BUSCOfEOG7DZ8XZ	Duplicated	DR_scaffold_0237	8647	19102	266.7	253
BUSCOfEOG7WT4D3	Duplicated	DR_scaffold_0247	36250	46498	190.8	132
BUSCOfEOG7WDNCD	Duplicated	DR_scaffold_0099	109470	120189	462.5	261
BUSCOfEOG7VHT6B	Duplicated	DR_scaffold_0146	46950	58299	953.2	470
BUSCOfEOG76MKMM	Duplicated	DR_scaffold_0080	68865	79613	430.3	289
BUSCOfEOG71CFZH	Duplicated	DR_scaffold_0045	188707	199077	321.6	185
BUSCOfEOG7FR7S6	Duplicated	DR_scaffold_0085	0	10846	925.8	890
BUSCOfEOG79SF5D	Duplicated	DR_scaffold_0007	430283	444290	1447.5	1145
BUSCOfEOG7QC85Z	Duplicated	DR_scaffold_0025	32703	43660	481.9	312
BUSCOfEOG7B3213	Duplicated	DR_scaffold_0122	143904	154272	222.3	163
BUSCOfEOG7HMS8M	Duplicated	DR_scaffold_0021	386542	399377	1502.3	893
BUSCOfEOG7N37N0	Duplicated	DR_scaffold_0184	83074	96562	1353.6	1072
BUSCOfEOG70KH0F	Duplicated	DR_scaffold_0120	104886	115918	604.1	375
BUSCOfEOG70S7JS	Duplicated	DR_scaffold_0292	15887	26231	207	131
BUSCOfEOG7HTHR9	Duplicated	DR_scaffold_0120	52950	65568	1031.6	971
BUSCOfEOG735492	Duplicated	DR_scaffold_0009	63326	73854	155.2	137
BUSCOfEOG73JM5T	Duplicated	DR_scaffold_0058	42602	53515	428.7	301
BUSCOfEOG7ZPNX0	Duplicated	DR_scaffold_0014	13624	24238	319.6	245
BUSCOfEOG7KSXHR	Duplicated	DR_scaffold_0186	44771	61385	3419.9	2226
BUSCOfEOG7W41M1	Duplicated	DR_scaffold_0096	165394	179740	2425.3	2026
BUSCOfEOG7X3R1P	Duplicated	DR_scaffold_0090	32912	44309	648.7	444
BUSCOfEOG786HCM	Duplicated	DR_scaffold_0012	96413	114919	666.9	400
BUSCOfEOG71P2KR	Duplicated	DR_scaffold_0282	16350	27837	620.7	565
BUSCOfEOG79SF7X	Fragmented	DR_scaffold_0099	68749	79126	148.9	164
BUSCOfEOG7WDNC2	Duplicated	DR_scaffold_0351	10302	21537	567	388
BUSCOfEOG76X69V	Duplicated	DR_scaffold_0136	129438	140265	461.9	343
BUSCOfEOG7NGQPJ	Fragmented	DR_scaffold_0094	136880	147807	110	96
BUSCOfEOG7MWH56	Duplicated	DR_scaffold_0151	64770	78298	2011.1	1072
BUSCOfEOG72RN9W	Duplicated	DR_scaffold_0236	7504	18253	352.2	224
BUSCOfEOG77Q571	Duplicated	DR_scaffold_0079	6424	17063	366.1	233
BUSCOfEOG77DJF6	Fragmented	DR_scaffold_0167	98688	111812	1038	660
BUSCOfEOG7KH9VN	Duplicated	DR_scaffold_0006	38807	49688	364.9	405
BUSCOfEOG79PJZ1	Duplicated	DR_scaffold_0106	121555	133162	581.5	451
BUSCOfEOG7TJ3TZ	Duplicated	DR_scaffold_0168	40117	51287	478.5	361
BUSCOfEOG73BVPW	Complete	DR_scaffold_0046	229564	240704	662.9	353
BUSCOfEOG7X3R1P	Duplicated	DR_scaffold_0065	10598	21962	647.4	448
BUSCOfEOG7SV14M	Duplicated	DR_scaffold_0016	377587	392858	1188.2	677
BUSCOfEOG7MH18Q	Duplicated	DR_scaffold_0004	402616	413411	390.3	227
BUSCOfEOG7FV3ZX	Duplicated	DR_scaffold_0008	210189	222345	1588	842
BUSCOfEOG708W9G	Duplicated	DR_scaffold_0054	40228	51967	480.5	559
BUSCOfEOG7TQV9T	Duplicated	DR_scaffold_0080	100360	111581	530.3	381
BUSCOfEOG71CFZD	Duplicated	DR_scaffold_0023	46291	57109	466.3	272
BUSCOfEOG7K9KD0	Fragmented	DR_scaffold_0008	432616	444089	924	803
BUSCOfEOG77WWR5	Complete	DR_scaffold_0046	12717	23335	299.4	188
BUSCOfEOG7SN8N7	Duplicated	DR_scaffold_0041	56177	67931	968.7	629
BUSCOfEOG7RJQ17	Duplicated	DR_scaffold_0174	10817	22522	630.9	522
BUSCOfEOG7NKKTQ	Duplicated	DR_scaffold_0090	170444	182873	1269.7	795
BUSCOfEOG76MKJK	Duplicated	DR_scaffold_0152	88127	99202	567.6	415
BUSCOfEOG7H4F2V	Duplicated	DR_scaffold_0002	481243	494091	1814	1357
BUSCOfEOG71GB6Z	Duplicated	DR_scaffold_0106	111736	122225	266.9	167
BUSCOfEOG77DJF5	Duplicated	DR_scaffold_0150	78764	92118	1247.9	958
BUSCOfEOG7KQ2CK	Duplicated	DR_scaffold_0204	72185	82697	38.7	194
BUSCOfEOG70S7FW	Duplicated	DR_scaffold_0198	65819	76676	478.3	376
BUSCOfEOG78WM14	Fragmented	DR_scaffold_0045	226950	240112	1056.5	693
BUSCOfEOG7GBG71	Duplicated	DR_scaffold_0061	202810	214468	726.6	506
BUSCOfEOG747PSQ	Duplicated	DR_scaffold_0164	53398	65330	914.2	760
BUSCOfEOG74TX6Z	Duplicated	DR_scaffold_0078	130363	143868	1970	1165
BUSCOfEOG7ZWDC7	Duplicated	DR_scaffold_0034	82820	93944	557.8	395
BUSCOfEOG7KWSTM	Complete	DR_scaffold_0009	306183	317341	529.5	328
BUSCOfEOG793BHN	Duplicated	DR_scaffold_0068	8853	20124	638.8	497
BUSCOfEOG7DZ8XZ	Duplicated	DR_scaffold_0022	239617	250072	265	253
BUSCOfEOG7WHHK2	Duplicated	DR_scaffold_0051	276718	289406	1493.3	1012
BUSCOfEOG722JJC	Fragmented	DR_scaffold_0107	176950	188507	917.9	526
BUSCOfEOG7712J5	Duplicated	DR_scaffold_0142	74567	86835	594.8	357
BUSCOfEOG7Z95XB	Duplicated	DR_scaffold_0015	148790	159532	261.2	196
BUSCOfEOG70ZZWZ	Duplicated	DR_scaffold_0006	302871	316074	827.2	512
BUSCOfEOG7ZPNWZ	Duplicated	DR_scaffold_0279	18267	28809	427.4	403
BUSCOfEOG78WM3D	Duplicated	DR_scaffold_0291	12548	23332	453.3	258
BUSCOfEOG7FBRWF	Duplicated	DR_scaffold_0089	163935	174327	284.5	231
BUSCOfEOG75J0WF	Fragmented	DR_scaffold_0010	474431	486896	571.8	385
BUSCOfEOG7SN8MT	Duplicated	DR_scaffold_0019	391052	404292	474.7	879
BUSCOfEOG7BS4KJ	Duplicated	DR_scaffold_0076	142942	154414	617.6	456
BUSCOfEOG7Q2NFT	Duplicated	DR_scaffold_0067	47426	77457	1509.7	983
BUSCOfEOG7F253S	Duplicated	DR_scaffold_0223	17547	28487	456.7	325
BUSCOfEOG78WM1V	Duplicated	DR_scaffold_0128	40934	52020	927.5	615
BUSCOfEOG741Z9S	Fragmented	DR_scaffold_0125	29104	44458	1654.6	1214
BUSCOfEOG75B8HW	Complete	DR_scaffold_0005	333669	344085	281	181
BUSCOfEOG7GN2W1	Duplicated	DR_scaffold_0169	5927	19023	1844.2	1113
BUSCOfEOG72C57X	Duplicated	DR_scaffold_0058	165391	184064	623	878
BUSCOfEOG7HXD2Z	Duplicated	DR_scaffold_0039	186095	196842	408.6	268
BUSCOfEOG747PT0	Duplicated	DR_scaffold_0016	408756	419751	324	241
BUSCOfEOG7CK3G4	Duplicated	DR_scaffold_0313	10091	28077	2363.4	1520
BUSCOfEOG751NV3	Duplicated	DR_scaffold_0136	130863	141128	133.1	83
BUSCOfEOG75J0WR	Duplicated	DR_scaffold_0101	172265	182774	347.4	391
BUSCOfEOG7B5X74	Duplicated	DR_scaffold_0004	182519	193592	536.4	343
BUSCOfEOG70ZZWP	Duplicated	DR_scaffold_0086	104923	118125	1564.1	1044
BUSCOfEOG7TJ3TD	Duplicated	DR_scaffold_0187	19095	30314	806.3	413
BUSCOfEOG7H79FB	Duplicated	DR_scaffold_0028	313483	323987	228.5	122
BUSCOfEOG7WT4D5	Duplicated	DR_scaffold_0061	196334	206722	182.3	165
BUSCOfEOG7Q8CZ6	Duplicated	DR_scaffold_0185	9267	20313	695.1	353
BUSCOfEOG7SFJ5S	Duplicated	DR_scaffold_0192	43578	54708	125.3	483
BUSCOfEOG7SBP20	Duplicated	DR_scaffold_0062	116984	127142	143.2	106
BUSCOfEOG72ZCQ7	Duplicated	DR_scaffold_0020	389892	401064	665.6	415
BUSCOfEOG74R21N	Duplicated	DR_scaffold_0098	111271	122385	637.5	370
BUSCOfEOG74N5VD	Duplicated	DR_scaffold_0030	340972	351367	196.4	134
BUSCOfEOG7GJ6PQ	Duplicated	DR_scaffold_0127	90642	101355	231	167
BUSCOfEOG7FZ099	Fragmented	DR_scaffold_0005	481783	492887	332.4	247
BUSCOfEOG7KH9V5	Duplicated	DR_scaffold_0003	464477	475501	563.3	362
BUSCOfEOG7CRV06	Duplicated	DR_scaffold_0070	68175	79724	587.5	491
BUSCOfEOG7N0CHQ	Duplicated	DR_scaffold_0273	17542	27997	438.5	365
BUSCOfEOG7JMGNT	Duplicated	DR_scaffold_0008	341226	354524	1503.1	986
BUSCOfEOG7RNK8W	Duplicated	DR_scaffold_0093	80367	126935	954.8	414
BUSCOfEOG7ZPNX4	Complete	DR_scaffold_0128	26020	36386	177.2	182
BUSCOfEOG7NSB9S	Duplicated	DR_scaffold_0001	672412	687472	1331.1	1537
BUSCOfEOG7Q2NHQ	Duplicated	DR_scaffold_0133	99706	110125	282.1	239
BUSCOfEOG747PX1	Duplicated	DR_scaffold_0169	17717	28093	253.7	133
BUSCOfEOG76QFVQ	Duplicated	DR_scaffold_0085	70301	80819	382.3	292
BUSCOfEOG7JQBX8	Duplicated	DR_scaffold_0012	340532	354412	610.7	561
BUSCOfEOG7RNK98	Duplicated	DR_scaffold_0195	6205	17426	617	361
BUSCOfEOG7GBG71	Duplicated	DR_scaffold_0002	135946	147605	729	506
BUSCOfEOG73NGCS	Duplicated	DR_scaffold_0106	68118	79464	516.4	533
BUSCOfEOG7V1G00	Duplicated	DR_scaffold_0204	29072	41638	1153.2	743
BUSCOfEOG715QCR	Complete	DR_scaffold_0343	5462	22709	956	1214
BUSCOfEOG75F4P2	Duplicated	DR_scaffold_0016	5277	16204	570.3	512
BUSCOfEOG7DC2FJ	Duplicated	DR_scaffold_0272	32495	43317	442.3	285
BUSCOfEOG7Z0K75	Duplicated	DR_scaffold_0171	79189	90268	572.9	372
BUSCOfEOG77T1H5	Duplicated	DR_scaffold_0103	75434	85757	296.7	241
BUSCOfEOG79W9FW	Duplicated	DR_scaffold_0045	179442	190401	587.6	339
BUSCOfEOG73JM40	Duplicated	DR_scaffold_0074	22866	34604	811.5	690
BUSCOfEOG7W9S51	Duplicated	DR_scaffold_0138	74138	84936	404.4	237
BUSCOfEOG7W9S43	Duplicated	DR_scaffold_0122	116515	127992	676	494
BUSCOfEOG7PCJR4	Duplicated	DR_scaffold_0085	49872	71271	5721.1	3642
BUSCOfEOG76X699	Duplicated	DR_scaffold_0056	260055	271382	452.1	410
BUSCOfEOG7K6Q74	Complete	DR_scaffold_0005	300013	310415	215.8	118
BUSCOfEOG7JX3DQ	Duplicated	DR_scaffold_0007	91300	102667	770.2	599
BUSCOfEOG7P2Z21	Duplicated	DR_scaffold_0257	42620	53918	875.4	523
BUSCOfEOG7QNVZZ	Duplicated	DR_scaffold_0002	279356	290052	431.5	301
BUSCOfEOG73BVPZ	Duplicated	DR_scaffold_0077	41968	52860	326.7	270
BUSCOfEOG7WX0KW	Duplicated	DR_scaffold_0126	50495	62134	503.8	451
BUSCOfEOG7B05P8	Duplicated	DR_scaffold_0290	31781	43137	627.6	473
BUSCOfEOG7KQ2B7	Complete	DR_scaffold_0146	111068	122440	903.2	435
BUSCOfEOG7TJ3TZ	Duplicated	DR_scaffold_0225	3021	14191	495.4	390
BUSCOfEOG7DJSZ0	Duplicated	DR_scaffold_0065	9074	19595	341.9	226
BUSCOfEOG70W3S0	Duplicated	DR_scaffold_0248	50825	61207	367.2	329
BUSCOfEOG7F2527	Duplicated	DR_scaffold_0146	52363	66826	1983	1592
BUSCOfEOG7JHMDW	Duplicated	DR_scaffold_0316	11505	23669	1140.4	857
BUSCOfEOG78D7TX	Duplicated	DR_scaffold_0029	239376	251319	868.1	706
BUSCOfEOG7WDNC5	Duplicated	DR_scaffold_0085	40556	52079	1224.7	667
BUSCOfEOG7GXPP8	Duplicated	DR_scaffold_0039	305296	316469	836.7	500
BUSCOfEOG7Z69MN	Duplicated	DR_scaffold_0010	492223	507254	2673.7	2174
BUSCOfEOG76MKNV	Duplicated	DR_scaffold_0117	42078	52606	243.4	109
BUSCOfEOG7G7KZ1	Complete	DR_scaffold_0087	61022	74105	1813.3	1250
BUSCOfEOG7CRTZV	Duplicated	DR_scaffold_0050	110238	122619	1356.4	784
BUSCOfEOG70GMQJ	Duplicated	DR_scaffold_0315	22451	34028	642.9	569
BUSCOfEOG7G4QRH	Duplicated	DR_scaffold_0056	64867	75709	456.3	330
BUSCOfEOG7MSMZ2	Duplicated	DR_scaffold_0078	177762	190008	1192.2	791
BUSCOfEOG7PZS5P	Duplicated	DR_scaffold_0096	78010	92854	1648	1108
BUSCOfEOG7RJQ36	Duplicated	DR_scaffold_0009	547451	558158	373	236
BUSCOfEOG7NW6JC	Duplicated	DR_scaffold_0029	291878	307842	1643.5	1484
BUSCOfEOG7WDNBS	Fragmented	DR_scaffold_0251	31429	42880	452.6	366
BUSCOfEOG7FBRTR	Duplicated	DR_scaffold_0022	221813	232646	557.1	395
BUSCOfEOG7SN8MT	Duplicated	DR_scaffold_0053	209924	223158	477.6	861
BUSCOfEOG73RBQC	Duplicated	DR_scaffold_0289	0	7851	277.6	150
BUSCOfEOG7FBRS5	Duplicated	DR_scaffold_0020	112230	124153	889	685
BUSCOfEOG7TJ3T6	Duplicated	DR_scaffold_0095	15965	27431	869.8	418
BUSCOfEOG7FBRW1	Duplicated	DR_scaffold_0019	368827	379297	354.6	153
BUSCOfEOG7TN01H	Complete	DR_scaffold_0009	335741	348508	1275.5	747
BUSCOfEOG783N3Z	Duplicated	DR_scaffold_0024	235805	250995	803.3	613
BUSCOfEOG72VHGT	Duplicated	DR_scaffold_0115	69346	80394	726.2	319
BUSCOfEOG7X9GK1	Duplicated	DR_scaffold_0082	204250	214807	374.8	193
BUSCOfEOG7WT49D	Duplicated	DR_scaffold_0056	235455	247329	1069.8	789
BUSCOfEOG73JM5R	Complete	DR_scaffold_0009	101109	112208	609.3	370
BUSCOfEOG7B05NN	Duplicated	DR_scaffold_0030	379362	398335	1021.9	738
BUSCOfEOG79W9FW	Duplicated	DR_scaffold_0174	3597	14556	589.1	337
BUSCOfEOG71K6BB	Duplicated	DR_scaffold_0050	255118	267981	1363.9	1014
BUSCOfEOG7N63XC	Complete	DR_scaffold_0009	215344	226948	858.6	498
BUSCOfEOG7B8SC7	Duplicated	DR_scaffold_0020	85668	97778	1236.9	710
BUSCOfEOG73BVR6	Duplicated	DR_scaffold_0009	287199	297624	181.6	123
BUSCOfEOG7GBG5H	Duplicated	DR_scaffold_0279	2745	14224	664.7	590
BUSCOfEOG7D59XT	Duplicated	DR_scaffold_0077	203993	215273	644.2	400
BUSCOfEOG7327X3	Duplicated	DR_scaffold_0116	16569	30193	1059.4	1163
[truncated: 632 more rows]

## Sheet: BUSCO results Transcriptome
#BUSCO_group	Status	Transcript	Bitscore	Length
BUSCOfEOG7JHMDP	Duplicated	DR_012572-RA	2213.1	1338
BUSCOfEOG7HB5JW	Duplicated	DR_003799-RA	677	749
BUSCOfEOG7CCC0Z	Duplicated	DR_012791-RA	1148.2	931
BUSCOfEOG7HB5M4	Duplicated	DR_003975-RA	693.5	400
BUSCOfEOG7G1VFT	Duplicated	DR_002386-RA	1587.8	1303
BUSCOfEOG7J44JS	Duplicated	DR_012515-RA	291.5	259
BUSCOfEOG7KH9TB	Duplicated	DR_012038-RA	1800.5	1069
BUSCOfEOG7TN012	Complete	DR_001011-RA	4317.3	2118
BUSCOfEOG7W41M9	Duplicated	DR_005001-RA	1448.2	779
BUSCOfEOG722JJ1	Duplicated	DR_007802-RA	860.8	708
BUSCOfEOG79GTGW	Duplicated	DR_004167-RA	704.9	664
BUSCOfEOG7SN8NV	Complete	DR_003840-RA	818.4	384
BUSCOfEOG7ZGXCR	Complete	DR_001679-RA	1010.2	448
BUSCOfEOG7CVQ7F	Duplicated	DR_011510-RA	1007.9	506
BUSCOfEOG7ZD25S	Duplicated	DR_003758-RA	647.3	361
BUSCOfEOG7WDNBS	Duplicated	DR_004195-RA	781.6	411
BUSCOfEOG7BZW2X	Duplicated	DR_007885-RA	693.3	387
BUSCOfEOG7HXD33	Duplicated	DR_001328-RA	580.9	324
BUSCOfEOG7Z69S1	Duplicated	DR_008422-RA	561.6	813
BUSCOfEOG7QK0PZ	Duplicated	DR_008313-RA	222.8	216
BUSCOfEOG7F51DN	Duplicated	DR_011654-RA	310.5	183
BUSCOfEOG7R83BB	Duplicated	DR_002339-RA	653.7	360
BUSCOfEOG76X682	Duplicated	DR_001890-RA	833.8	613
BUSCOfEOG73545F	Duplicated	DR_009611-RA	1195	633
BUSCOfEOG7W15FV	Complete	DR_008498-RA	496.2	326
BUSCOfEOG7966R0	Duplicated	DR_001569-RA	1253.4	847
BUSCOfEOG75MW6X	Duplicated	DR_009414-RA	116.3	262
BUSCOfEOG7QZGNM	Duplicated	DR_011866-RA	542.8	322
BUSCOfEOG7Q8CWT	Duplicated	DR_005279-RA	1160.9	655
BUSCOfEOG7GXPKV	Duplicated	DR_008173-RA	1796.4	1354
BUSCOfEOG75TMNV	Duplicated	DR_004268-RA	533.5	464
BUSCOfEOG7XSTPB	Duplicated	DR_002993-RA	961.8	586
BUSCOfEOG7J9W1K	Duplicated	DR_008430-RA	201.9	312
BUSCOfEOG7ZGXCD	Duplicated	DR_009487-RA	532.1	777
BUSCOfEOG7B05NR	Complete	DR_002952-RA	2144.3	1158
BUSCOfEOG7BP8F0	Duplicated	DR_000648-RA	312.1	262
BUSCOfEOG7W41QC	Duplicated	DR_002200-RA	336	210
BUSCOfEOG7Q5HQM	Complete	DR_009726-RA	666.8	434
BUSCOfEOG78SQVF	Duplicated	DR_010942-RA	136	222
BUSCOfEOG7J70QG	Duplicated	DR_005498-RA	1037	543
BUSCOfEOG75QRC9	Duplicated	DR_007147-RA	2531.6	1930
BUSCOfEOG79KPPX	Duplicated	DR_003342-RA	557.5	535
BUSCOfEOG7966V3	Fragmented	DR_000233-RA	249.4	122
BUSCOfEOG7TXKT9	Duplicated	DR_011501-RA	812.2	543
BUSCOfEOG7G1VGN	Duplicated	DR_007351-RA	1099.9	559
BUSCOfEOG7B05NZ	Duplicated	DR_005414-RA	880.1	523
BUSCOfEOG74FFC7	Duplicated	DR_010391-RA	287	218
BUSCOfEOG7GJ6PG	Duplicated	DR_013593-RA	861.6	573
BUSCOfEOG74BK39	Duplicated	DR_013925-RA	319.6	203
BUSCOfEOG744TK7	Duplicated	DR_000111-RA	757.1	488
BUSCOfEOG7SJDFS	Duplicated	DR_010647-RA	473	357
BUSCOfEOG7VHT6T	Duplicated	DR_004785-RA	774.9	449
BUSCOfEOG7VX95T	Complete	DR_001040-RA	997.3	474
BUSCOfEOG757D9B	Duplicated	DR_002142-RA	230.4	154
BUSCOfEOG708W9T	Complete	DR_002051-RA	410.4	279
BUSCOfEOG7ZSJ2V	Duplicated	DR_011905-RA	804.1	593
BUSCOfEOG7PZS9D	Complete	DR_013364-RA	257.7	149
BUSCOfEOG72NS06	Complete	DR_013659-RA	1061.7	520
BUSCOfEOG7P2Z2N	Complete	DR_001121-RA	490.8	398
BUSCOfEOG79PJXX	Duplicated	DR_000663-RA	1040.7	583
BUSCOfEOG7PCJT9	Duplicated	DR_009654-RA	611.3	444
BUSCOfEOG7NKKX2	Duplicated	DR_003915-RA	573.1	444
BUSCOfEOG77HDTF	Complete	DR_004253-RA	157.1	79
BUSCOfEOG7TF7K9	Duplicated	DR_007692-RA	752.5	820
BUSCOfEOG7WDNDF	Duplicated	DR_003371-RA	332.8	237
BUSCOfEOG7WDNF7	Duplicated	DR_007142-RA	233.7	202
BUSCOfEOG783N3S	Duplicated	DR_006737-RA	1346	1006
BUSCOfEOG7WDN9S	Duplicated	DR_009501-RA	2733.9	1764
BUSCOfEOG715QCH	Duplicated	DR_007777-RA	1359.5	974
BUSCOfEOG7KH9T3	Duplicated	DR_004573-RA	932.4	883
BUSCOfEOG7FNCKC	Duplicated	DR_013762-RA	1486.9	1290
BUSCOfEOG7HTHVM	Duplicated	DR_013441-RA	273.7	181
BUSCOfEOG7S2265	Duplicated	DR_011900-RA	1324.4	984
BUSCOfEOG7FJH8N	Complete	DR_011402-RA	752.1	516
BUSCOfEOG7C2RBK	Duplicated	DR_001722-RA	465.1	299
BUSCOfEOG7J44HQ	Duplicated	DR_003021-RA	440	314
BUSCOfEOG7R83CW	Duplicated	DR_007466-RA	422.5	255
BUSCOfEOG7T1RKQ	Duplicated	DR_001948-RA	1349	824
BUSCOfEOG715QF5	Duplicated	DR_012209-RA	786.7	461
BUSCOfEOG7BZW2X	Duplicated	DR_010875-RA	692.6	387
BUSCOfEOG7008JM	Duplicated	DR_002076-RA	611.3	417
BUSCOfEOG7BW0WH	Duplicated	DR_001801-RA	416	385
BUSCOfEOG747PSK	Duplicated	DR_011042-RA	831.3	568
BUSCOfEOG78PVJ7	Duplicated	DR_003348-RA	1562.6	1128
BUSCOfEOG7TXKW3	Duplicated	DR_010299-RA	173.6	118
BUSCOfEOG757D5M	Complete	DR_010980-RA	1974.8	1320
BUSCOfEOG744TJK	Complete	DR_011143-RA	923	845
BUSCOfEOG7FR7QW	Duplicated	DR_013277-RA	983	767
BUSCOfEOG7QVMCR	Duplicated	DR_004091-RA	258.4	280
BUSCOfEOG7647C5	Duplicated	DR_001266-RA	432.5	409
BUSCOfEOG7XSTQT	Duplicated	DR_008357-RA	897.8	541
BUSCOfEOG7ZGXCZ	Duplicated	DR_011770-RA	681	400
BUSCOfEOG7G4QRH	Duplicated	DR_008452-RA	460.7	324
BUSCOfEOG7GJ6QS	Duplicated	DR_005242-RA	504.8	254
BUSCOfEOG7MWH6S	Duplicated	DR_010664-RA	815.5	449
BUSCOfEOG76X682	Duplicated	DR_000203-RA	841.9	613
BUSCOfEOG7MWH56	Duplicated	DR_007884-RA	1909.1	1053
BUSCOfEOG7K3V05	Duplicated	DR_008227-RA	287.1	204
BUSCOfEOG75B8HW	Complete	DR_000923-RA	278.7	181
BUSCOfEOG7M0P4G	Duplicated	DR_012353-RA	268.7	207
BUSCOfEOG7WT4CC	Complete	DR_008216-RA	304.9	202
BUSCOfEOG7B320D	Duplicated	DR_006771-RA	247.9	190
BUSCOfEOG7Q5HQD	Complete	DR_013178-RA	392.4	245
BUSCOfEOG7DNP5M	Duplicated	DR_006103-RA	394.1	298
BUSCOfEOG7ZD27J	Duplicated	DR_003553-RA	243.3	132
BUSCOfEOG7QRR76	Duplicated	DR_002058-RA	297.9	183
BUSCOfEOG7WHHNH	Duplicated	DR_005792-RA	404	204
BUSCOfEOG7MWH5Z	Duplicated	DR_010784-RA	990.1	557
BUSCOfEOG71ZPBX	Duplicated	DR_010500-RA	533.2	311
BUSCOfEOG7Q8CZB	Duplicated	DR_009435-RA	478.7	314
BUSCOfEOG7MPRRK	Duplicated	DR_011581-RA	516.6	337
BUSCOfEOG79W9DR	Duplicated	DR_006204-RA	810.6	652
BUSCOfEOG7P5TBB	Duplicated	DR_007452-RA	650.3	502
BUSCOfEOG7G1VFT	Duplicated	DR_012115-RA	1722	1402
BUSCOfEOG7JT75V	Duplicated	DR_001135-RA	588.1	334
BUSCOfEOG7DFXQ2	Duplicated	DR_006870-RA	732.4	348
BUSCOfEOG70PC6J	Duplicated	DR_001870-RA	970.7	578
BUSCOfEOG74R21N	Duplicated	DR_008695-RA	643.3	366
BUSCOfEOG7NPG2M	Duplicated	DR_013090-RA	1163.3	1014
BUSCOfEOG70ZZXC	Duplicated	DR_006813-RA	584.8	520
BUSCOfEOG75J0XC	Duplicated	DR_010842-RA	822.2	446
BUSCOfEOG7MSN0V	Duplicated	DR_002526-RA	513.5	344
BUSCOfEOG7Z0K74	Duplicated	DR_010459-RA	420.2	261
BUSCOfEOG7BCNPR	Complete	DR_009188-RA	536.9	329
BUSCOfEOG7VTDXX	Duplicated	DR_008476-RA	667.1	398
BUSCOfEOG7ZGXF1	Duplicated	DR_003796-RA	508.6	324
BUSCOfEOG77WWN5	Duplicated	DR_002752-RA	1003.8	661
BUSCOfEOG7GQZ4F	Complete	DR_008082-RA	1208	655
BUSCOfEOG7XH70W	Duplicated	DR_003273-RA	820.5	539
BUSCOfEOG7W15CW	Duplicated	DR_009817-RA	967.3	502
BUSCOfEOG7VMPGS	Duplicated	DR_011251-RA	645.5	371
BUSCOfEOG7QC871	Duplicated	DR_003482-RA	680.5	382
BUSCOfEOG78PVJ7	Duplicated	DR_006088-RA	1621.7	1128
BUSCOfEOG71CFWK	Duplicated	DR_002635-RA	678.9	500
BUSCOfEOG74N5S9	Duplicated	DR_013674-RA	914.3	461
BUSCOfEOG7G4QPG	Duplicated	DR_001756-RA	1270.1	798
BUSCOfEOG7PS1S5	Duplicated	DR_006827-RA	316.7	258
BUSCOfEOG74TX7J	Duplicated	DR_013241-RA	1286.6	773
BUSCOfEOG7FJHC6	Duplicated	DR_003828-RA	356.7	245
BUSCOfEOG7XH70W	Duplicated	DR_010034-RA	1250.1	679
BUSCOfEOG7NPG2S	Duplicated	DR_000706-RA	1800.2	1259
BUSCOfEOG7KWSVP	Duplicated	DR_004272-RA	285.9	213
BUSCOfEOG7KM654	Complete	DR_009420-RA	429	270
BUSCOfEOG7DJSVT	Duplicated	DR_006514-RA	1267.6	842
BUSCOfEOG7CG78C	Duplicated	DR_009646-RA	525.4	404
BUSCOfEOG725DV9	Duplicated	DR_011525-RA	329.6	282
BUSCOfEOG7SJDDG	Duplicated	DR_012028-RA	1133.3	596
BUSCOfEOG7PP5JH	Complete	DR_013375-RA	306.2	303
BUSCOfEOG7TN05B	Duplicated	DR_013318-RA	208.2	162
BUSCOfEOG7WQ81K	Duplicated	DR_012138-RA	1238.2	1491
BUSCOfEOG706124	Duplicated	DR_006340-RA	731.7	424
BUSCOfEOG7J9W0X	Complete	DR_005462-RA	480.7	298
BUSCOfEOG7673K5	Duplicated	DR_007736-RA	1452	957
BUSCOfEOG793BHN	Duplicated	DR_006790-RA	637.5	447
BUSCOfEOG7MKWG6	Duplicated	DR_000465-RA	1046.2	563
BUSCOfEOG7P02TJ	Duplicated	DR_010659-RA	1289.4	828
BUSCOfEOG754J1M	Duplicated	DR_010537-RA	360.8	224
BUSCOfEOG7P2Z2M	Duplicated	DR_012592-RA	446.9	458
BUSCOfEOG71VT21	Duplicated	DR_012598-RA	2131.9	1330
BUSCOfEOG7J70QK	Duplicated	DR_012866-RA	774.3	558
BUSCOfEOG7KSXHR	Duplicated	DR_003479-RA	3545.9	2367
BUSCOfEOG78PVP2	Duplicated	DR_003856-RA	92.9	98
BUSCOfEOG74BK18	Duplicated	DR_001211-RA	1819	1669
BUSCOfEOG7BS4M9	Duplicated	DR_009264-RA	478.6	410
BUSCOfEOG7NKKXH	Duplicated	DR_010618-RA	209.6	198
BUSCOfEOG75B8GB	Complete	DR_005458-RA	1126.5	722
BUSCOfEOG7KQ28X	Duplicated	DR_008722-RA	2581.4	1532
BUSCOfEOG7CNZQ6	Duplicated	DR_000141-RA	1385.7	941
BUSCOfEOG72ZCQF	Duplicated	DR_000330-RA	810.2	515
BUSCOfEOG7WDNC5	Duplicated	DR_007842-RA	1329	681
BUSCOfEOG773XSW	Duplicated	DR_012424-RA	459.2	363
BUSCOfEOG79SF6H	Duplicated	DR_004436-RA	433.3	585
BUSCOfEOG7WDNCV	Duplicated	DR_010409-RA	836	524
BUSCOfEOG7DVDQ1	Duplicated	DR_002345-RA	344	251
BUSCOfEOG70S7FW	Complete	DR_000188-RA	465	347
BUSCOfEOG7TTQKB	Duplicated	DR_002554-RA	562.9	246
BUSCOfEOG76X68V	Complete	DR_001027-RA	472.2	315
BUSCOfEOG72G1GS	Duplicated	DR_006528-RA	528.6	521
BUSCOfEOG7SN8R7	Duplicated	DR_009717-RA	348.5	145
BUSCOfEOG7CNZTF	Duplicated	DR_001444-RA	260.4	169
BUSCOfEOG7M3JBN	Duplicated	DR_013535-RA	624.3	523
BUSCOfEOG73JM5X	Duplicated	DR_006788-RA	376.8	312
BUSCOfEOG70W3NS	Duplicated	DR_005128-RA	2195.5	1396
BUSCOfEOG73BVPK	Duplicated	DR_002186-RA	457.9	311
BUSCOfEOG7T7H2J	Duplicated	DR_005080-RA	329.5	618
BUSCOfEOG7SBNZS	Duplicated	DR_006135-RA	592.2	363
BUSCOfEOG77HDS9	Duplicated	DR_004564-RA	381.4	234
BUSCOfEOG7Z95XD	Duplicated	DR_010845-RA	731.8	477
BUSCOfEOG7WDNG0	Duplicated	DR_007111-RA	182.8	119
BUSCOfEOG7HHX51	Duplicated	DR_011373-RA	338.8	180
BUSCOfEOG7RZ5ZF	Duplicated	DR_010806-RA	725.6	465
BUSCOfEOG7NSBC8	Duplicated	DR_001390-RA	672.8	371
BUSCOfEOG7B8SF4	Duplicated	DR_005215-RA	359.2	196
BUSCOfEOG7BCNM6	Complete	DR_005788-RA	1502.9	857
BUSCOfEOG7DJSZ0	Duplicated	DR_008166-RA	338.4	221
BUSCOfEOG7SXWFH	Duplicated	DR_012902-RA	560.8	441
BUSCOfEOG7WQ84Z	Duplicated	DR_002137-RA	1066.1	948
BUSCOfEOG7V1G2Z	Duplicated	DR_003979-RA	432	350
BUSCOfEOG7C8GV0	Fragmented	DR_012467-RA	493.5	247
BUSCOfEOG79KPPX	Duplicated	DR_006095-RA	555.6	533
BUSCOfEOG783N6S	Duplicated	DR_002900-RA	401.6	279
BUSCOfEOG70PC63	Duplicated	DR_005776-RA	1293.8	895
BUSCOfEOG7FBRW1	Complete	DR_002867-RA	359.1	181
BUSCOfEOG7KH9TM	Complete	DR_005479-RA	1334.9	587
BUSCOfEOG7NPG2G	Duplicated	DR_003853-RA	2495.3	2071
BUSCOfEOG757D71	Duplicated	DR_003718-RA	554.2	371
BUSCOfEOG73FQZ2	Duplicated	DR_004254-RA	359.5	262
BUSCOfEOG783N3Z	Duplicated	DR_006047-RA	817	546
BUSCOfEOG71GB3B	Duplicated	DR_002838-RA	884.1	847
BUSCOfEOG78SQSW	Duplicated	DR_002253-RA	204.3	545
BUSCOfEOG7QK0PZ	Duplicated	DR_011291-RA	219.1	216
BUSCOfEOG7JMGRX	Duplicated	DR_007311-RA	407.9	269
BUSCOfEOG7W41NN	Duplicated	DR_010538-RA	400.8	306
BUSCOfEOG7B8SGP	Duplicated	DR_000382-RA	175.3	193
BUSCOfEOG79GTGF	Complete	DR_001675-RA	998.6	550
BUSCOfEOG7V1G2H	Duplicated	DR_009599-RA	253.2	221
BUSCOfEOG7QZGNM	Duplicated	DR_004231-RA	544.3	322
BUSCOfEOG7W41N8	Complete	DR_005086-RA	1234.8	816
BUSCOfEOG7HTHTK	Duplicated	DR_006875-RA	623.3	476
BUSCOfEOG786HCM	Duplicated	DR_006200-RA	668.1	407
BUSCOfEOG79W9FD	Duplicated	DR_009997-RA	1049.9	537
BUSCOfEOG71ZPBN	Duplicated	DR_009609-RA	491.7	291
BUSCOfEOG7V76G6	Duplicated	DR_007455-RA	1092.2	719
BUSCOfEOG7Q8CZB	Duplicated	DR_005752-RA	456.8	273
BUSCOfEOG7Z95WZ	Duplicated	DR_011010-RA	660.8	350
BUSCOfEOG7FR7R3	Duplicated	DR_004488-RA	1774.9	988
BUSCOfEOG7GJ6PQ	Duplicated	DR_009842-RA	366.2	265
BUSCOfEOG71GB4R	Duplicated	DR_011592-RA	1027.2	743
BUSCOfEOG7Q8CZ6	Duplicated	DR_011786-RA	695.2	353
BUSCOfEOG7TJ3S6	Duplicated	DR_009690-RA	1761.1	1139
BUSCOfEOG73NGD9	Duplicated	DR_012190-RA	502.7	298
BUSCOfEOG7Q8D07	Duplicated	DR_008378-RA	282.1	224
BUSCOfEOG7RBZK3	Duplicated	DR_002352-RA	538	393
BUSCOfEOG7P2Z4K	Complete	DR_013799-RA	272.6	167
BUSCOfEOG78SQVJ	Duplicated	DR_007565-RA	497.9	311
BUSCOfEOG7JDR6J	Duplicated	DR_000221-RA	533.5	700
BUSCOfEOG7B05QC	Duplicated	DR_001803-RA	610.1	381
BUSCOfEOG7FBRWF	Duplicated	DR_008095-RA	283.8	227
BUSCOfEOG7KH9V5	Duplicated	DR_005175-RA	553.6	365
BUSCOfEOG7ZD23R	Duplicated	DR_001089-RA	1385.8	871
BUSCOfEOG70GMQZ	Complete	DR_013597-RA	910.4	676
BUSCOfEOG77WWNJ	Duplicated	DR_004211-RA	717.6	609
BUSCOfEOG7V1G10	Duplicated	DR_011168-RA	856	425
BUSCOfEOG7V76FS	Duplicated	DR_009492-RA	794.2	535
BUSCOfEOG71GB4M	Duplicated	DR_001596-RA	513.9	330
BUSCOfEOG74N5SD	Fragmented	DR_011979-RA	827.1	722
BUSCOfEOG75QRC9	Duplicated	DR_013055-RA	2377.1	1843
BUSCOfEOG757D71	Duplicated	DR_003990-RA	470.1	280
BUSCOfEOG7H79BK	Duplicated	DR_005364-RA	1083	505
BUSCOfEOG7V4B6X	Duplicated	DR_001812-RA	1243.7	895
BUSCOfEOG78PVMF	Duplicated	DR_005500-RA	369	216
BUSCOfEOG7TN05B	Duplicated	DR_011542-RA	209.5	162
BUSCOfEOG7WX0KP	Duplicated	DR_008079-RA	509.9	458
BUSCOfEOG7XWPZ7	Duplicated	DR_003694-RA	896.2	570
BUSCOfEOG7MPRQ9	Complete	DR_003062-RA	621	422
BUSCOfEOG7N37RH	Duplicated	DR_013333-RA	279.9	173
BUSCOfEOG75MW7P	Duplicated	DR_005833-RA	282.2	248
BUSCOfEOG70W3P6	Duplicated	DR_002722-RA	1605.6	1127
BUSCOfEOG7Z3FG9	Duplicated	DR_011778-RA	505.1	284
BUSCOfEOG7XDBRV	Duplicated	DR_004177-RA	632.1	336
BUSCOfEOG73NGCS	Duplicated	DR_009016-RA	543	458
BUSCOfEOG7P2Z26	Duplicated	DR_004652-RA	632.8	590
BUSCOfEOG7MWH92	Duplicated	DR_005840-RA	247.2	158
BUSCOfEOG72892M	Duplicated	DR_000165-RA	638.3	453
BUSCOfEOG7PZS60	Duplicated	DR_009988-RA	552.4	682
BUSCOfEOG76QFVQ	Duplicated	DR_007848-RA	390.8	273
BUSCOfEOG7FJHC7	Complete	DR_011706-RA	361.9	245
BUSCOfEOG76HQDT	Duplicated	DR_000590-RA	218.9	129
BUSCOfEOG7XSTR7	Duplicated	DR_010170-RA	572.8	579
BUSCOfEOG757D5X	Duplicated	DR_003863-RA	484.3	512
BUSCOfEOG7Z3FDD	Duplicated	DR_013392-RA	1006.8	514
BUSCOfEOG783N3N	Duplicated	DR_001354-RA	1571.4	1227
BUSCOfEOG773XQR	Duplicated	DR_003536-RA	1171.9	651
BUSCOfEOG7QC87H	Duplicated	DR_004926-RA	353.3	188
BUSCOfEOG790G80	Duplicated	DR_008013-RA	3808.5	2114
BUSCOfEOG7W6WV5	Duplicated	DR_007737-RA	1136.7	770
BUSCOfEOG78SQSZ	Duplicated	DR_000633-RA	929.4	687
BUSCOfEOG7N0CHT	Duplicated	DR_001823-RA	251.1	139
BUSCOfEOG71VT28	Duplicated	DR_001377-RA	905	739
BUSCOfEOG7N906G	Duplicated	DR_009005-RA	344.1	239
BUSCOfEOG7RV9S0	Duplicated	DR_004833-RA	662.3	335
BUSCOfEOG793BHN	Duplicated	DR_007573-RA	647.7	447
BUSCOfEOG793BK3	Duplicated	DR_003012-RA	351.8	281
BUSCOfEOG72C5C8	Duplicated	DR_008641-RA	320.7	172
BUSCOfEOG7GBG90	Duplicated	DR_003397-RA	190.2	109
BUSCOfEOG79W9GP	Duplicated	DR_010665-RA	443.4	246
BUSCOfEOG72NRZG	Duplicated	DR_004467-RA	1380.7	933
BUSCOfEOG77DJGT	Duplicated	DR_006998-RA	660.8	400
BUSCOfEOG72G1H6	Duplicated	DR_011861-RA	1292.5	821
BUSCOfEOG77Q55C	Duplicated	DR_012148-RA	643.5	633
BUSCOfEOG75XGVQ	Duplicated	DR_009855-RA	1418	914
BUSCOfEOG7CG77P	Complete	DR_000927-RA	1151.9	800
BUSCOfEOG7RV9S3	Duplicated	DR_004548-RA	446.1	291
BUSCOfEOG7N63VZ	Duplicated	DR_002404-RA	1365.2	1328
BUSCOfEOG7SFJ8S	Duplicated	DR_012527-RA	426	311
BUSCOfEOG79GTHH	Duplicated	DR_008759-RA	676.9	546
BUSCOfEOG7PZS7F	Duplicated	DR_008643-RA	648.6	410
BUSCOfEOG7J188V	Duplicated	DR_007325-RA	204.7	191
BUSCOfEOG7GXPNJ	Duplicated	DR_008275-RA	510.6	342
BUSCOfEOG7ZKSMC	Duplicated	DR_013156-RA	1018.1	504
BUSCOfEOG7GBG70	Duplicated	DR_003334-RA	699.5	374
BUSCOfEOG7673NV	Duplicated	DR_003318-RA	267.4	175
BUSCOfEOG7XDBRM	Duplicated	DR_010433-RA	670.9	359
BUSCOfEOG7M3J7N	Duplicated	DR_002008-RA	1441.5	1135
BUSCOfEOG72G1GK	Duplicated	DR_004237-RA	1087.5	681
BUSCOfEOG7HQNM6	Duplicated	DR_003528-RA	463.6	420
BUSCOfEOG7M98QZ	Duplicated	DR_002289-RA	1548.8	669
BUSCOfEOG74BK2S	Complete	DR_007612-RA	670.9	370
BUSCOfEOG7MKWG6	Duplicated	DR_011120-RA	1148.4	626
BUSCOfEOG7JHMH7	Complete	DR_000848-RA	292.9	295
BUSCOfEOG7SV14M	Duplicated	DR_000391-RA	1190.6	656
BUSCOfEOG71RXXP	Duplicated	DR_008390-RA	139	101
BUSCOfEOG7WT4CT	Duplicated	DR_011468-RA	365	229
BUSCOfEOG79CZ8V	Complete	DR_002390-RA	418.5	295
BUSCOfEOG7HTHSD	Duplicated	DR_004950-RA	516.4	457
BUSCOfEOG77WWMQ	Complete	DR_005515-RA	2357.4	1778
BUSCOfEOG7DC2CX	Complete	DR_009067-RA	1177.4	917
BUSCOfEOG783N61	Complete	DR_006317-RA	419.1	300
BUSCOfEOG789CMF	Duplicated	DR_006763-RA	868.1	549
BUSCOfEOG7PK9BN	Duplicated	DR_002675-RA	422.9	192
BUSCOfEOG7NGQKW	Duplicated	DR_007433-RA	1990.8	1705
BUSCOfEOG7GTTG0	Duplicated	DR_008168-RA	361.8	224
BUSCOfEOG7DZ8XP	Duplicated	DR_006410-RA	207	161
BUSCOfEOG7NSB9S	Duplicated	DR_000166-RA	1575.9	1628
BUSCOfEOG7NW6JR	Duplicated	DR_009407-RA	900.3	657
BUSCOfEOG7TTQMZ	Duplicated	DR_006802-RA	211.5	265
BUSCOfEOG7P02VP	Duplicated	DR_009789-RA	458	290
BUSCOfEOG73RBMM	Duplicated	DR_004083-RA	982.7	529
BUSCOfEOG7KH9Z0	Duplicated	DR_012280-RA	464.2	306
BUSCOfEOG7PCJRS	Duplicated	DR_003278-RA	931.2	763
BUSCOfEOG74N5RB	Duplicated	DR_008258-RA	1064.1	706
BUSCOfEOG7B05NZ	Duplicated	DR_005216-RA	879.2	526
BUSCOfEOG73Z34Z	Duplicated	DR_003099-RA	350.5	246
BUSCOfEOG751NTH	Complete	DR_010287-RA	206.2	119
BUSCOfEOG7SFJ8S	Duplicated	DR_003658-RA	426.8	311
BUSCOfEOG7SN8MR	Duplicated	DR_008197-RA	1527.4	1280
BUSCOfEOG7RFTTM	Duplicated	DR_000593-RA	648.3	485
BUSCOfEOG7MKWFF	Complete	DR_006324-RA	1088.6	802
BUSCOfEOG72C57X	Duplicated	DR_006203-RA	605.5	422
BUSCOfEOG7GJ6PB	Duplicated	DR_006127-RA	616.2	438
BUSCOfEOG75TMNG	Duplicated	DR_003409-RA	1014.4	681
BUSCOfEOG7N905X	Duplicated	DR_008321-RA	404.2	311
BUSCOfEOG7BGHV7	Duplicated	DR_013146-RA	1492.4	770
BUSCOfEOG7D2FR2	Duplicated	DR_011096-RA	590.6	441
BUSCOfEOG7J44H6	Complete	DR_007875-RA	805	504
BUSCOfEOG73NGF6	Complete	DR_006164-RA	452.3	256
BUSCOfEOG70W3S0	Duplicated	DR_012286-RA	366.2	317
BUSCOfEOG75MW6G	Duplicated	DR_010619-RA	373.6	283
BUSCOfEOG7CRTZ8	Duplicated	DR_010567-RA	1410.9	1610
BUSCOfEOG70PC6J	Duplicated	DR_000222-RA	973.8	576
BUSCOfEOG7CNZQ6	Duplicated	DR_008097-RA	1299.5	900
BUSCOfEOG7966SK	Duplicated	DR_002224-RA	664	445
BUSCOfEOG7NSB9K	Duplicated	DR_011585-RA	2940.4	2577
BUSCOfEOG7673K1	Duplicated	DR_009891-RA	1794.7	1289
BUSCOfEOG79W9FW	Duplicated	DR_005243-RA	595.6	345
BUSCOfEOG7DJSXH	Complete	DR_000837-RA	405.4	270
BUSCOfEOG7D865Z	Complete	DR_005217-RA	534.8	355
BUSCOfEOG72NS19	Complete	DR_010452-RA	502.2	314
BUSCOfEOG7PGF01	Duplicated	DR_005233-RA	1442.2	1167
BUSCOfEOG7ZD25S	Duplicated	DR_001178-RA	644.7	355
BUSCOfEOG78SQVJ	Duplicated	DR_006797-RA	504.9	311
BUSCOfEOG7NSBB4	Fragmented	DR_008465-RA	395.8	364
BUSCOfEOG7K9KD0	Duplicated	DR_009121-RA	930.7	757
BUSCOfEOG7Q8CXK	Duplicated	DR_000514-RA	677.1	478
BUSCOfEOG74TX7R	Duplicated	DR_013430-RA	264.3	574
BUSCOfEOG7J70TZ	Duplicated	DR_007003-RA	177.3	128
BUSCOfEOG7K3TW0	Duplicated	DR_006604-RA	613.8	402
BUSCOfEOG7WDNBS	Duplicated	DR_013587-RA	787.4	414
BUSCOfEOG74FFB1	Duplicated	DR_002563-RA	314.5	265
BUSCOfEOG7WDNG0	Duplicated	DR_005390-RA	183.2	119
BUSCOfEOG7J1899	Complete	DR_000871-RA	486.5	429
BUSCOfEOG7S7SSS	Duplicated	DR_000010-RA	279.1	165
BUSCOfEOG7673KF	Duplicated	DR_000472-RA	1679.1	1117
BUSCOfEOG70CRG6	Duplicated	DR_010702-RA	1260.7	1037
BUSCOfEOG715QCH	Duplicated	DR_006639-RA	1459.5	1081
BUSCOfEOG7CVQ76	Duplicated	DR_001762-RA	492.7	287
BUSCOfEOG7T1RKH	Duplicated	DR_000907-RA	1629.7	1358
BUSCOfEOG7QNVVM	Duplicated	DR_003919-RA	1146	631
BUSCOfEOG7HTHRJ	Duplicated	DR_003785-RA	679	620
BUSCOfEOG7Q8CZ6	Duplicated	DR_008648-RA	698.2	353
BUSCOfEOG7DC2DB	Complete	DR_012556-RA	916.8	566
BUSCOfEOG7ZPNXQ	Duplicated	DR_012605-RA	288.1	143
BUSCOfEOG70GMV4	Duplicated	DR_012492-RA	283.9	184
BUSCOfEOG71K6FB	Duplicated	DR_004695-RA	328.6	304
BUSCOfEOG7PVWXQ	Duplicated	DR_005067-RA	2192.7	1200
BUSCOfEOG7SJDGT	Duplicated	DR_004081-RA	368.5	198
BUSCOfEOG71ZPBX	Duplicated	DR_011594-RA	328.4	338
BUSCOfEOG7DRJF3	Duplicated	DR_007904-RA	285.1	195
BUSCOfEOG7XSTRS	Complete	DR_013056-RA	349.1	245
BUSCOfEOG7008JT	Duplicated	DR_004037-RA	472.1	428
BUSCOfEOG747PV3	Duplicated	DR_008845-RA	499.1	307
BUSCOfEOG783N4K	Duplicated	DR_012744-RA	1114.7	613
BUSCOfEOG7BGHVT	Complete	DR_002104-RA	908.4	495
BUSCOfEOG751NSD	Duplicated	DR_005313-RA	721.6	487
BUSCOfEOG74R219	Complete	DR_004522-RA	1023.3	647
BUSCOfEOG751NQG	Duplicated	DR_002126-RA	892.1	519
BUSCOfEOG7TXKW3	Duplicated	DR_009973-RA	168.2	117
BUSCOfEOG715QF5	Duplicated	DR_001846-RA	780.7	465
BUSCOfEOG7TQV9T	Duplicated	DR_007407-RA	545.3	376
BUSCOfEOG77WWPP	Duplicated	DR_010393-RA	280.6	369
BUSCOfEOG783N3S	Duplicated	DR_009567-RA	1345.7	1006
BUSCOfEOG7966T3	Complete	DR_002349-RA	634.7	481
BUSCOfEOG72RNB6	Duplicated	DR_010281-RA	184.8	77
BUSCOfEOG7N0CHX	Duplicated	DR_013752-RA	182.9	126
BUSCOfEOG712V5N	Duplicated	DR_010649-RA	605.8	348
BUSCOfEOG725DV9	Duplicated	DR_006162-RA	316.8	270
BUSCOfEOG7VDZ18	Duplicated	DR_002226-RA	144.7	170
BUSCOfEOG7RNK8W	Duplicated	DR_008449-RA	1035.5	427
BUSCOfEOG77WWRD	Duplicated	DR_001353-RA	249.8	157
BUSCOfEOG7FFN1K	Complete	DR_005465-RA	588	604
BUSCOfEOG73RBNP	Duplicated	DR_003467-RA	547.5	337
BUSCOfEOG7B05QM	Duplicated	DR_011358-RA	625.4	400
BUSCOfEOG7XSTS6	Duplicated	DR_006375-RA	447.2	266
BUSCOfEOG7T7H2J	Duplicated	DR_000191-RA	1482.3	802
BUSCOfEOG7K0ZNC	Duplicated	DR_009900-RA	960.3	513
BUSCOfEOG769ZXC	Duplicated	DR_009549-RA	189.4	196
BUSCOfEOG7DZ8Z5	Duplicated	DR_005783-RA	181.5	106
BUSCOfEOG76HQDT	Duplicated	DR_012141-RA	199.3	129
BUSCOfEOG70PC83	Duplicated	DR_002794-RA	535	489
BUSCOfEOG7DVDK9	Complete	DR_000868-RA	2478.6	1449
BUSCOfEOG751NQP	Duplicated	DR_002903-RA	796.6	619
BUSCOfEOG7PVX27	Duplicated	DR_003006-RA	1045.7	580
BUSCOfEOG7PVX16	Duplicated	DR_003032-RA	346.8	264
BUSCOfEOG7RBZKC	Duplicated	DR_004064-RA	825.3	483
BUSCOfEOG7TJ3T5	Duplicated	DR_011520-RA	477.1	374
BUSCOfEOG7SN8P3	Duplicated	DR_007396-RA	420.2	270
BUSCOfEOG7X6M97	Complete	DR_013080-RA	635.9	524
BUSCOfEOG75XGZ9	Duplicated	DR_002101-RA	308.8	218
BUSCOfEOG7GTTCP	Duplicated	DR_002213-RA	768.7	696
BUSCOfEOG7ZWDB2	Duplicated	DR_012604-RA	788.3	428
BUSCOfEOG7NGQQW	Complete	DR_012388-RA	241.6	152
BUSCOfEOG706113	Complete	DR_005435-RA	747.7	490
BUSCOfEOG7MD52N	Duplicated	DR_010706-RA	436.1	214
BUSCOfEOG7T4MTQ	Duplicated	DR_008721-RA	1848.9	1381
BUSCOfEOG71P2KZ	Duplicated	DR_001926-RA	825.9	542
BUSCOfEOG74R21M	Complete	DR_000287-RA	990.2	778
BUSCOfEOG7034SQ	Complete	DR_002387-RA	552.7	329
BUSCOfEOG79PJXX	Duplicated	DR_008278-RA	1034.7	583
BUSCOfEOG7KWSTD	Complete	DR_000545-RA	748.8	583
BUSCOfEOG7H4F5X	Duplicated	DR_005127-RA	205.2	179
BUSCOfEOG7Z3FFT	Duplicated	DR_005376-RA	478.9	292
BUSCOfEOG79W9DR	Duplicated	DR_001969-RA	810	653
BUSCOfEOG7VDZ18	Duplicated	DR_001658-RA	251.9	217
BUSCOfEOG75QRCP	Duplicated	DR_012600-RA	1188.1	820
BUSCOfEOG7S7SRV	Duplicated	DR_011097-RA	459.8	246
BUSCOfEOG71GB67	Duplicated	DR_007119-RA	517.2	248
BUSCOfEOG7008K4	Complete	DR_003387-RA	504	284
BUSCOfEOG7GBG86	Duplicated	DR_006317-RA	393.6	182
BUSCOfEOG7CRTZ8	Duplicated	DR_000766-RA	1404.9	1610
BUSCOfEOG7NPG2S	Duplicated	DR_001902-RA	1805.5	1265
BUSCOfEOG7673KF	Duplicated	DR_011114-RA	1761.1	1139
BUSCOfEOG7WT4CT	Duplicated	DR_004212-RA	366.5	229
BUSCOfEOG7SFJ6P	Duplicated	DR_013197-RA	484.8	313
BUSCOfEOG7M6DK3	Duplicated	DR_008927-RA	661.5	383
BUSCOfEOG7MPRRX	Complete	DR_009049-RA	330.6	222
BUSCOfEOG7VMPGM	Complete	DR_006615-RA	398.5	239
BUSCOfEOG70CRJQ	Duplicated	DR_003681-RA	394.2	267
BUSCOfEOG7HTHSN	Fragmented	DR_000656-RA	1200.3	749
BUSCOfEOG747PT4	Duplicated	DR_001568-RA	758.2	484
BUSCOfEOG7WX0KW	Duplicated	DR_009504-RA	456.3	457
BUSCOfEOG7F51DN	Duplicated	DR_011518-RA	310.4	183
BUSCOfEOG7HQNJB	Duplicated	DR_011094-RA	910.8	959
BUSCOfEOG7VB2QQ	Duplicated	DR_001342-RA	853.9	588
BUSCOfEOG73Z358	Duplicated	DR_013337-RA	529	220
BUSCOfEOG7WHHNH	Duplicated	DR_008589-RA	78.9	199
BUSCOfEOG78M09Q	Duplicated	DR_004448-RA	779.7	573
BUSCOfEOG7F253S	Duplicated	DR_011670-RA	457.2	325
BUSCOfEOG78M09Q	Duplicated	DR_009840-RA	788.3	575
BUSCOfEOG7WHHK2	Duplicated	DR_012908-RA	1544.3	870
BUSCOfEOG79CZ7K	Duplicated	DR_009144-RA	1218.5	915
BUSCOfEOG7HF1X1	Duplicated	DR_013377-RA	354.1	267
BUSCOfEOG7XH72F	Duplicated	DR_005849-RA	315.4	206
BUSCOfEOG7G4QSH	Duplicated	DR_009158-RA	514.8	347
BUSCOfEOG7X6M8Z	Duplicated	DR_012909-RA	427.7	417
BUSCOfEOG7G1VG0	Duplicated	DR_000592-RA	2017.7	1050
BUSCOfEOG76TB4Q	Duplicated	DR_012308-RA	204.3	137
BUSCOfEOG72VHFN	Duplicated	DR_000251-RA	979.3	680
BUSCOfEOG7K6Q66	Duplicated	DR_001578-RA	440.6	343
BUSCOfEOG7WQ84C	Duplicated	DR_009913-RA	404	319
BUSCOfEOG7FR7RC	Duplicated	DR_005332-RA	1138.5	841
BUSCOfEOG7N63WB	Duplicated	DR_003803-RA	1329.6	895
BUSCOfEOG7J44J3	Duplicated	DR_005013-RA	433.8	285
BUSCOfEOG7D2FR2	Duplicated	DR_005870-RA	749.5	503
BUSCOfEOG71P2Q2	Duplicated	DR_010536-RA	213.8	125
BUSCOfEOG7H1JX5	Complete	DR_001193-RA	412.6	288
BUSCOfEOG7H1JV1	Duplicated	DR_002490-RA	1285.2	869
BUSCOfEOG7ZD249	Duplicated	DR_013242-RA	1038.3	494
BUSCOfEOG7FZ09D	Duplicated	DR_003920-RA	351.9	220
BUSCOfEOG7GJ6PG	Duplicated	DR_009157-RA	779.9	487
BUSCOfEOG7SV15G	Duplicated	DR_011460-RA	600.2	320
BUSCOfEOG7KWSTW	Duplicated	DR_012200-RA	487.2	332
BUSCOfEOG7H1JXQ	Duplicated	DR_005852-RA	392.6	339
BUSCOfEOG7RBZJB	Duplicated	DR_002925-RA	1490	784
BUSCOfEOG7K0ZMR	Duplicated	DR_009319-RA	600.2	470
BUSCOfEOG7J9W16	Complete	DR_002113-RA	731.7	399
BUSCOfEOG7M3J7T	Duplicated	DR_012451-RA	2228	1728
BUSCOfEOG7KH9T3	Duplicated	DR_006503-RA	938.3	902
BUSCOfEOG75QRCP	Duplicated	DR_011684-RA	1284.5	865
BUSCOfEOG7G4QQG	Duplicated	DR_003364-RA	331	474
BUSCOfEOG7NPG2M	Duplicated	DR_013134-RA	1164.7	1024
BUSCOfEOG7VDXXJ	Duplicated	DR_004899-RA	747.6	1281
BUSCOfEOG7VX96V	Duplicated	DR_008370-RA	577.8	417
BUSCOfEOG7KM64K	Duplicated	DR_007420-RA	398.1	244
BUSCOfEOG78SQSZ	Duplicated	DR_004485-RA	939.1	687
BUSCOfEOG78M09B	Duplicated	DR_005772-RA	1399	1129
BUSCOfEOG7H4F3M	Duplicated	DR_002893-RA	1262.6	817
BUSCOfEOG75J0WK	Complete	DR_008000-RA	1043.4	862
BUSCOfEOG70PC63	Duplicated	DR_009459-RA	1295.7	895
BUSCOfEOG7HMS8M	Complete	DR_004758-RA	1539.4	917
BUSCOfEOG7MSMX8	Duplicated	DR_000471-RA	1427.8	1019
BUSCOfEOG7JQBX8	Duplicated	DR_008546-RA	612.2	536
BUSCOfEOG7Q8CWQ	Duplicated	DR_005770-RA	1283.5	1107
BUSCOfEOG7W15CT	Duplicated	DR_002015-RA	950.6	800
BUSCOfEOG72894C	Duplicated	DR_007245-RA	247.7	165
BUSCOfEOG7RV9QQ	Duplicated	DR_002480-RA	1141.3	725
BUSCOfEOG7DRJDW	Complete	DR_005446-RA	671.6	489
BUSCOfEOG79KPTV	Duplicated	DR_011539-RA	201.9	132
BUSCOfEOG7SN8NM	Duplicated	DR_002955-RA	530.9	476
BUSCOfEOG7X3R31	Complete	DR_000717-RA	451.2	263
BUSCOfEOG7BS4NR	Complete	DR_007775-RA	351	205
BUSCOfEOG7FBRS5	Duplicated	DR_003047-RA	868.8	681
BUSCOfEOG7M0P2N	Duplicated	DR_011947-RA	576	312
BUSCOfEOG79GTHH	Duplicated	DR_011936-RA	652.2	512
BUSCOfEOG7RBZKK	Duplicated	DR_011030-RA	394.9	315
BUSCOfEOG78M0B3	Duplicated	DR_008871-RA	612.6	516
BUSCOfEOG7TJ3TQ	Duplicated	DR_007441-RA	452.3	330
BUSCOfEOG79GTFQ	Duplicated	DR_008788-RA	1602.5	1248
BUSCOfEOG7Q8CX4	Complete	DR_001689-RA	1118.3	561
BUSCOfEOG7B8SCW	Duplicated	DR_001245-RA	672.8	484
BUSCOfEOG73BVMX	Duplicated	DR_009740-RA	1226.3	1256
BUSCOfEOG7Q2NFT	Duplicated	DR_004319-RA	1593.7	1001
BUSCOfEOG77DJH3	Duplicated	DR_003877-RA	395.8	263
BUSCOfEOG7B5X4M	Complete	DR_002146-RA	900.1	671
BUSCOfEOG75MW6X	Duplicated	DR_010135-RA	245.3	215
BUSCOfEOG7MWH55	Duplicated	DR_009657-RA	1603.5	1355
BUSCOfEOG7XSTQ5	Duplicated	DR_000731-RA	677.1	377
BUSCOfEOG7M3J7M	Duplicated	DR_008122-RA	1412.3	1048
BUSCOfEOG7GBG58	Duplicated	DR_006779-RA	797.2	997
BUSCOfEOG7P2Z3B	Duplicated	DR_004157-RA	561.5	291
BUSCOfEOG715QDR	Complete	DR_013352-RA	611.5	329
BUSCOfEOG7PK9BN	Duplicated	DR_006764-RA	420.4	173
BUSCOfEOG744TM6	Duplicated	DR_003390-RA	519.6	298
BUSCOfEOG7T4MVB	Duplicated	DR_000582-RA	787.6	584
BUSCOfEOG799302	Duplicated	DR_008780-RA	1692.5	937
BUSCOfEOG757D5X	Duplicated	DR_007371-RA	475.3	510
BUSCOfEOG77DJGM	Duplicated	DR_011436-RA	516.2	306
BUSCOfEOG7BGHWP	Duplicated	DR_008562-RA	619	333
BUSCOfEOG73NGD9	Duplicated	DR_004183-RA	617	347
BUSCOfEOG7VX96G	Duplicated	DR_006291-RA	328.5	216
BUSCOfEOG7NW6JP	Duplicated	DR_012671-RA	834.4	783
BUSCOfEOG7BW0T1	Duplicated	DR_004707-RA	1344.4	930
BUSCOfEOG7BP8C2	Duplicated	DR_012266-RA	318.8	337
BUSCOfEOG7G7M1K	Duplicated	DR_008964-RA	287.1	198
BUSCOfEOG7ZWDC9	Duplicated	DR_013539-RA	491	257
BUSCOfEOG7DVDN4	Duplicated	DR_009871-RA	743.7	448
BUSCOfEOG74TX6Z	Duplicated	DR_007467-RA	1972.7	1165
BUSCOfEOG72RN6D	Duplicated	DR_007722-RA	941.8	733
BUSCOfEOG77WWR5	Complete	DR_005424-RA	290.1	183
BUSCOfEOG74R247	Duplicated	DR_013217-RA	208	108
BUSCOfEOG7K9KC2	Duplicated	DR_004465-RA	449.1	459
BUSCOfEOG7P8PN5	Duplicated	DR_002145-RA	212.1	125
BUSCOfEOG7RRFJ7	Duplicated	DR_006491-RA	612.9	381
BUSCOfEOG7ZWDCC	Duplicated	DR_010673-RA	559.3	415
BUSCOfEOG7H1JXQ	Duplicated	DR_010697-RA	398.5	337
BUSCOfEOG7NPG3Q	Duplicated	DR_008388-RA	820	388
BUSCOfEOG78D7VT	Duplicated	DR_009226-RA	978.7	591
BUSCOfEOG77DJF5	Duplicated	DR_010929-RA	1244.5	967
BUSCOfEOG7KSXMV	Duplicated	DR_003406-RA	914.7	668
BUSCOfEOG7P8PJ3	Duplicated	DR_005614-RA	737.9	544
BUSCOfEOG7TXKRS	Duplicated	DR_003179-RA	657.8	451
BUSCOfEOG71VT4B	Complete	DR_008304-RA	1120.2	784
BUSCOfEOG7VX94P	Duplicated	DR_011888-RA	931.3	612
BUSCOfEOG718KPK	Duplicated	DR_004135-RA	924.5	453
BUSCOfEOG747PSQ	Duplicated	DR_011167-RA	924.3	635
BUSCOfEOG7Z69S1	Duplicated	DR_003578-RA	561.7	822
BUSCOfEOG72C57M	Duplicated	DR_003375-RA	2659.1	1699
BUSCOfEOG7FR7S9	Fragmented	DR_004658-RA	235.9	191
BUSCOfEOG7712J9	Duplicated	DR_003974-RA	530.8	324
BUSCOfEOG7VB2QQ	Duplicated	DR_008263-RA	860.6	589
BUSCOfEOG7KDFMZ	Complete	DR_010316-RA	214.8	429
BUSCOfEOG7TJ3VQ	Duplicated	DR_008929-RA	306.1	228
BUSCOfEOG73Z358	Duplicated	DR_004918-RA	531.1	221
BUSCOfEOG7SN8RW	Duplicated	DR_004999-RA	232.7	124
BUSCOfEOG7ZGXC2	Duplicated	DR_008886-RA	688.6	446
BUSCOfEOG7D867D	Duplicated	DR_010853-RA	583.5	375
BUSCOfEOG7GFBFJ	Duplicated	DR_001102-RA	662.2	443
BUSCOfEOG7PS1S5	Duplicated	DR_009729-RA	315.7	255
BUSCOfEOG75TMNR	Fragmented	DR_001695-RA	2536.2	1942
BUSCOfEOG7K9KDQ	Duplicated	DR_010312-RA	1169.7	865
BUSCOfEOG7GXPP8	Duplicated	DR_004699-RA	832.7	491
BUSCOfEOG7DC2DF	Duplicated	DR_007805-RA	974.4	533
BUSCOfEOG73BVNC	Duplicated	DR_002906-RA	1809	1070
BUSCOfEOG77DJHR	Duplicated	DR_013688-RA	658.2	440
BUSCOfEOG7380FP	Fragmented	DR_002006-RA	443.3	264
BUSCOfEOG7KQ2CK	Duplicated	DR_013137-RA	288.3	258
BUSCOfEOG7ZPNVK	Duplicated	DR_010140-RA	580.4	416
BUSCOfEOG7VB2QZ	Duplicated	DR_012808-RA	532	368
BUSCOfEOG7TJ3S6	Duplicated	DR_000118-RA	1778.5	1125
BUSCOfEOG741ZD8	Duplicated	DR_004410-RA	394.7	230
BUSCOfEOG71P2Q2	Duplicated	DR_013742-RA	213.8	125
BUSCOfEOG776T0T	Duplicated	DR_005224-RA	269.6	205
BUSCOfEOG722JJ1	Duplicated	DR_001087-RA	876.7	710
BUSCOfEOG7HHX3R	Duplicated	DR_006499-RA	610.6	438
BUSCOfEOG7Z95WZ	Duplicated	DR_008374-RA	660.8	350
BUSCOfEOG7PVX27	Duplicated	DR_002964-RA	1034.4	578
BUSCOfEOG71VT21	Duplicated	DR_011682-RA	2136.8	1331
BUSCOfEOG7QG4H3	Duplicated	DR_006331-RA	162.8	124
BUSCOfEOG741ZC1	Duplicated	DR_003771-RA	551.6	429
BUSCOfEOG7SV166	Duplicated	DR_010941-RA	815.7	411
BUSCOfEOG7G7M2F	Complete	DR_000517-RA	323.5	290
BUSCOfEOG7B05QM	Duplicated	DR_010317-RA	566.4	364
BUSCOfEOG793BK3	Duplicated	DR_002958-RA	351.2	281
BUSCOfEOG7VTDXX	Duplicated	DR_005727-RA	667.3	358
BUSCOfEOG757D6F	Duplicated	DR_009529-RA	1246.9	765
BUSCOfEOG7T1RKM	Duplicated	DR_003679-RA	1204.2	889
BUSCOfEOG7X0VV3	Complete	DR_000859-RA	356.6	244
BUSCOfEOG7673K5	Duplicated	DR_010856-RA	1412.2	929
BUSCOfEOG712V4J	Duplicated	DR_011049-RA	4664	3085
BUSCOfEOG7BP8C2	Duplicated	DR_010966-RA	861.7	405
BUSCOfEOG7N0CHQ	Duplicated	DR_013106-RA	443.6	367
BUSCOfEOG74N5S9	Duplicated	DR_004042-RA	375.4	372
BUSCOfEOG7GQZ3Z	Duplicated	DR_002173-RA	2347.2	1685
BUSCOfEOG74TX76	Complete	DR_000935-RA	1080	758
BUSCOfEOG7SN8MQ	Duplicated	DR_006346-RA	2628.3	1955
BUSCOfEOG747PS9	Duplicated	DR_003042-RA	1867.2	1395
BUSCOfEOG7VQJP2	Duplicated	DR_002687-RA	508.6	377
BUSCOfEOG73BVNC	Duplicated	DR_003063-RA	1826.2	1070
BUSCOfEOG7QNVWW	Duplicated	DR_012665-RA	1143.9	491
BUSCOfEOG72G1GS	Duplicated	DR_004549-RA	956.7	463
BUSCOfEOG72RN6D	Duplicated	DR_007250-RA	943.2	743
BUSCOfEOG79PK0S	Duplicated	DR_002841-RA	545.4	254
BUSCOfEOG7J9W22	Duplicated	DR_008483-RA	230.5	174
BUSCOfEOG7KQ2B9	Duplicated	DR_007231-RA	754.9	333
BUSCOfEOG7MPRQ0	Duplicated	DR_004637-RA	971.9	500
BUSCOfEOG74FFC7	Duplicated	DR_002441-RA	161.7	620
BUSCOfEOG7SR4ZT	Duplicated	DR_005863-RA	215.9	167
BUSCOfEOG75TMNG	Duplicated	DR_006027-RA	1014.1	681
BUSCOfEOG7XH72F	Duplicated	DR_003088-RA	58.2	139
BUSCOfEOG7RFTVR	Duplicated	DR_007076-RA	227.1	209
BUSCOfEOG7R2BV4	Duplicated	DR_013174-RA	420.6	411
BUSCOfEOG7KWSS4	Duplicated	DR_007175-RA	1798.4	1000
BUSCOfEOG7K0ZR4	Complete	DR_013250-RA	305.2	143
BUSCOfEOG7VQJQS	Complete	DR_010900-RA	218.1	290
BUSCOfEOG7QNVX7	Duplicated	DR_007799-RA	594.3	423
BUSCOfEOG7HB5K9	Duplicated	DR_006418-RA	697.6	512
BUSCOfEOG7N0CDV	Duplicated	DR_008848-RA	978	544
BUSCOfEOG7JDR96	Duplicated	DR_007635-RA	449.2	249
BUSCOfEOG72G1GS	Duplicated	DR_001594-RA	961.6	509
BUSCOfEOG7T4MVB	Duplicated	DR_008109-RA	175.1	716
BUSCOfEOG7RV9TT	Duplicated	DR_003219-RA	311.7	317
BUSCOfEOG7CCC0D	Duplicated	DR_006884-RA	2398.7	1565
BUSCOfEOG70PC6K	Complete	DR_005078-RA	683.6	583
BUSCOfEOG71CFWK	Duplicated	DR_005977-RA	756.6	545
BUSCOfEOG7FV40Z	Duplicated	DR_007909-RA	540.3	414
BUSCOfEOG7GTTD4	Duplicated	DR_002374-RA	644.9	480
BUSCOfEOG7RBZHR	Complete	DR_004054-RA	1096.7	1158
BUSCOfEOG7Z0K5V	Duplicated	DR_003575-RA	799.3	424
BUSCOfEOG7ZGXCD	Duplicated	DR_013689-RA	539.8	777
BUSCOfEOG72VHFB	Duplicated	DR_011241-RA	2069.7	1272
BUSCOfEOG7V4B7X	Duplicated	DR_013618-RA	495.7	536
BUSCOfEOG7QVMC1	Duplicated	DR_003615-RA	741.8	434
BUSCOfEOG7Z95VT	Duplicated	DR_009370-RA	707.5	413
BUSCOfEOG7NSB9K	Duplicated	DR_009757-RA	2925.8	2575
BUSCOfEOG74N5S8	Duplicated	DR_013459-RA	715.4	403
BUSCOfEOG7P2Z2M	Duplicated	DR_011676-RA	448.4	452
BUSCOfEOG7FFN2S	Complete	DR_007991-RA	883.4	644
BUSCOfEOG71CFWG	Duplicated	DR_009360-RA	505.8	388
BUSCOfEOG7X9GGC	Duplicated	DR_010738-RA	1717.7	1006
BUSCOfEOG747PVB	Complete	DR_007568-RA	417.6	424
BUSCOfEOG77WWNF	Duplicated	DR_001457-RA	1434.8	848
BUSCOfEOG78D7TX	Duplicated	DR_009987-RA	683.4	502
BUSCOfEOG7ZSJ2V	Duplicated	DR_008026-RA	805.9	596
BUSCOfEOG754HXV	Duplicated	DR_002010-RA	2140.4	1164
BUSCOfEOG70KGZ3	Duplicated	DR_011829-RA	1430.2	829
BUSCOfEOG7PS1RB	Duplicated	DR_012932-RA	307.4	272
BUSCOfEOG7NSBBC	Duplicated	DR_010035-RA	1017.4	690
BUSCOfEOG7VDZ15	Duplicated	DR_009244-RA	459.2	289
BUSCOfEOG786HFQ	Duplicated	DR_006730-RA	318	187
BUSCOfEOG7MSMZD	Duplicated	DR_001103-RA	795.5	773
BUSCOfEOG7ZD23T	Duplicated	DR_004026-RA	1225.9	961
BUSCOfEOG7VTDWK	Complete	DR_001037-RA	1432.3	1072
BUSCOfEOG75XGWH	Duplicated	DR_004405-RA	294.4	317
BUSCOfEOG7GJ6P5	Duplicated	DR_002622-RA	725.9	460
BUSCOfEOG7SBP03	Duplicated	DR_009043-RA	657.8	448
BUSCOfEOG7M0P3P	Duplicated	DR_008907-RA	321.2	170
BUSCOfEOG75B8JB	Duplicated	DR_008571-RA	442.4	289
BUSCOfEOG7XPZJ6	Duplicated	DR_003077-RA	395.5	234
BUSCOfEOG73RBQC	Duplicated	DR_013326-RA	282	151
BUSCOfEOG70CRGK	Complete	DR_001668-RA	1462.1	758
BUSCOfEOG7F7WKS	Duplicated	DR_003550-RA	1420.3	893
BUSCOfEOG74N5VD	Duplicated	DR_004077-RA	190.4	121
BUSCOfEOG7ZGXF1	Duplicated	DR_001140-RA	508.7	322
BUSCOfEOG77WWN5	Duplicated	DR_006619-RA	953.7	660
BUSCOfEOG7SN8PR	Duplicated	DR_007463-RA	459.1	314
BUSCOfEOG7X0VT2	Duplicated	DR_000050-RA	581.3	329
BUSCOfEOG7NPG3J	Duplicated	DR_005234-RA	788.5	502
BUSCOfEOG7QG4CT	Duplicated	DR_003281-RA	1199.4	722
BUSCOfEOG7JQC05	Duplicated	DR_009107-RA	389.5	286
BUSCOfEOG7J9VZZ	Complete	DR_012480-RA	573.2	396
BUSCOfEOG75MW6G	Duplicated	DR_010251-RA	372.7	282
BUSCOfEOG78WM3D	Duplicated	DR_011538-RA	459.8	258
BUSCOfEOG7712KX	Complete	DR_000995-RA	306.4	135
BUSCOfEOG7DVDQB	Complete	DR_000606-RA	278.3	169
BUSCOfEOG7RBZJM	Duplicated	DR_009065-RA	936.9	716
BUSCOfEOG7WDNF3	Duplicated	DR_004670-RA	407.1	241
BUSCOfEOG7XM380	Duplicated	DR_013564-RA	713	458
BUSCOfEOG7ZD23T	Duplicated	DR_008327-RA	1292.8	958
BUSCOfEOG7PGF35	Duplicated	DR_007628-RA	259.6	201
BUSCOfEOG780RZC	Duplicated	DR_000327-RA	498.1	248
BUSCOfEOG7XM36Z	Duplicated	DR_000817-RA	987.4	637
BUSCOfEOG7K9KD3	Duplicated	DR_004273-RA	87.6	301
BUSCOfEOG7Z0K4N	Duplicated	DR_011239-RA	2388.4	1702
BUSCOfEOG7KQ2B7	Complete	DR_010858-RA	904.4	437
BUSCOfEOG72NS1Q	Duplicated	DR_002904-RA	456.3	411
BUSCOfEOG7CK3G4	Duplicated	DR_006467-RA	3199.4	2250
BUSCOfEOG706124	Duplicated	DR_004261-RA	728.5	424
BUSCOfEOG73V6WQ	Duplicated	DR_010796-RA	355.7	256
BUSCOfEOG7380HP	Duplicated	DR_010501-RA	255.4	226
BUSCOfEOG7WDN9V	Duplicated	DR_007703-RA	1527.2	1013
BUSCOfEOG7X3R27	Duplicated	DR_010028-RA	1266	1254
BUSCOfEOG71K6CX	Duplicated	DR_009853-RA	537.7	452
BUSCOfEOG76HQDG	Duplicated	DR_006167-RA	276.4	286
BUSCOfEOG7008JT	Duplicated	DR_013668-RA	577.1	502
BUSCOfEOG7WQ84C	Duplicated	DR_003160-RA	379.6	399
BUSCOfEOG76MKJ7	Duplicated	DR_003795-RA	669.9	521
BUSCOfEOG72JWTK	Duplicated	DR_012409-RA	354.9	174
BUSCOfEOG7GJ6PB	Duplicated	DR_004846-RA	615.2	438
BUSCOfEOG7W15FB	Complete	DR_009478-RA	436.7	218
BUSCOfEOG7JQBXJ	Duplicated	DR_001909-RA	843.5	552
BUSCOfEOG72G1H6	Duplicated	DR_005358-RA	792.1	847
BUSCOfEOG7W9S43	Duplicated	DR_009644-RA	676.5	498
BUSCOfEOG7H79FB	Duplicated	DR_001143-RA	223.4	130
BUSCOfEOG7SFJ5S	Duplicated	DR_004735-RA	565.4	484
BUSCOfEOG7QRR3J	Duplicated	DR_010937-RA	736.9	639
BUSCOfEOG7RFTT2	Duplicated	DR_007258-RA	859.9	626
BUSCOfEOG7JHMH4	Duplicated	DR_006092-RA	484.6	315
BUSCOfEOG7R83CW	Duplicated	DR_008980-RA	425.2	257
BUSCOfEOG7D59ZK	Duplicated	DR_000679-RA	436.1	312
BUSCOfEOG77WWR0	Duplicated	DR_004556-RA	347.5	178
BUSCOfEOG75MW8C	Duplicated	DR_002379-RA	177.9	164
BUSCOfEOG7TJ3TH	Duplicated	DR_009957-RA	470.2	350
BUSCOfEOG7H79F8	Duplicated	DR_004678-RA	482.2	384
BUSCOfEOG71P2N2	Duplicated	DR_006901-RA	696.5	383
BUSCOfEOG7X3R0Z	Duplicated	DR_010564-RA	1092.4	865
BUSCOfEOG7QG4GR	Complete	DR_008515-RA	230.7	156
BUSCOfEOG7712J9	Duplicated	DR_013020-RA	583.8	337
BUSCOfEOG7S7SRV	Duplicated	DR_005869-RA	458.6	245
BUSCOfEOG7G7KZ2	Duplicated	DR_006306-RA	575.9	542
BUSCOfEOG7380GZ	Complete	DR_013372-RA	361	230
BUSCOfEOG75TMPT	Complete	DR_001000-RA	776.7	467
BUSCOfEOG7RFTVM	Duplicated	DR_008944-RA	474.2	229
BUSCOfEOG7FZ09D	Duplicated	DR_009878-RA	390.4	224
BUSCOfEOG7JDR8D	Duplicated	DR_007036-RA	773.9	521
BUSCOfEOG7FBRWV	Duplicated	DR_007161-RA	168.7	104
BUSCOfEOG7SFJ6P	Duplicated	DR_007169-RA	485.2	313
BUSCOfEOG79W9F2	Fragmented	DR_009900-RA	621.6	377
BUSCOfEOG7WX0JP	Duplicated	DR_001547-RA	654.6	389
BUSCOfEOG7GN2WM	Duplicated	DR_006645-RA	970.4	584
BUSCOfEOG7QRR35	Duplicated	DR_012017-RA	1229	1158
BUSCOfEOG70610P	Duplicated	DR_000131-RA	800.8	719
BUSCOfEOG7C8GV0	Fragmented	DR_002258-RA	493.4	247
BUSCOfEOG7DFXNZ	Duplicated	DR_002598-RA	944.9	563
BUSCOfEOG7K6Q3H	Complete	DR_004030-RA	726.8	621
BUSCOfEOG73NGD9	Duplicated	DR_012191-RA	510.9	286
BUSCOfEOG77DJJM	Duplicated	DR_002443-RA	331.2	201
BUSCOfEOG7BGHWR	Complete	DR_002194-RA	587.8	375
BUSCOfEOG7F51C4	Duplicated	DR_001980-RA	402.8	274
BUSCOfEOG7GBG5H	Complete	DR_013194-RA	701.8	708
BUSCOfEOG78WM3D	Duplicated	DR_013314-RA	454	258
BUSCOfEOG7FZ07M	Duplicated	DR_006518-RA	1097.7	457
BUSCOfEOG7PZS60	Duplicated	DR_010283-RA	540.2	705
BUSCOfEOG72NRZG	Duplicated	DR_009820-RA	1380.2	935
BUSCOfEOG7V76GC	Complete	DR_013483-RA	565.7	386
BUSCOfEOG7KSXK1	Complete	DR_001691-RA	652.5	459
BUSCOfEOG78M09D	Duplicated	DR_000650-RA	1716.6	951
BUSCOfEOG7F2528	Duplicated	DR_001822-RA	1132.1	922
BUSCOfEOG78D7TX	Duplicated	DR_010284-RA	870.7	737
BUSCOfEOG757D5X	Duplicated	DR_003859-RA	733.3	687
BUSCOfEOG73BVQ8	Duplicated	DR_002754-RA	465.8	274
BUSCOfEOG7HXD37	Complete	DR_008527-RA	257.4	168
BUSCOfEOG70ZZWP	Duplicated	DR_004063-RA	1564.5	1044
BUSCOfEOG7N37PR	Duplicated	DR_001563-RA	968.5	654
BUSCOfEOG7KDFPN	Duplicated	DR_001233-RA	289	220
BUSCOfEOG7GBG90	Duplicated	DR_006037-RA	179	109
BUSCOfEOG7P5TBB	Duplicated	DR_008994-RA	566	493
BUSCOfEOG73RBMT	Duplicated	DR_007693-RA	1234.1	931
BUSCOfEOG7P2Z26	Duplicated	DR_004654-RA	1055.9	574
BUSCOfEOG7J187V	Duplicated	DR_013519-RA	1027.8	715
BUSCOfEOG7J44J3	Duplicated	DR_011967-RA	433.7	285
BUSCOfEOG712V5N	Duplicated	DR_007323-RA	197.8	325
BUSCOfEOG7Z69MN	Duplicated	DR_002204-RA	2701.4	1994
BUSCOfEOG73JM66	Complete	DR_012846-RA	682.3	485
BUSCOfEOG7G1VHK	Duplicated	DR_000454-RA	580.1	348
BUSCOfEOG7VQJNP	Duplicated	DR_004302-RA	990.9	710
BUSCOfEOG7PGF3B	Duplicated	DR_013517-RA	271.4	152
BUSCOfEOG7BGHVG	Duplicated	DR_008663-RA	1551.6	1161
BUSCOfEOG7VX983	Duplicated	DR_008579-RA	225.9	154
BUSCOfEOG70PC9D	Duplicated	DR_008713-RA	301.2	210
BUSCOfEOG7M6DK3	Duplicated	DR_004946-RA	659.3	379
BUSCOfEOG7W6WX6	Duplicated	DR_009887-RA	108.3	254
BUSCOfEOG751NRJ	Complete	DR_007982-RA	602.2	492
BUSCOfEOG71GB67	Duplicated	DR_005398-RA	515.9	245
BUSCOfEOG7BW0T1	Duplicated	DR_000076-RA	1214.2	854
BUSCOfEOG7GTTCP	Duplicated	DR_001645-RA	781.2	696
BUSCOfEOG7G1VFR	Duplicated	DR_003048-RA	1053.5	799
BUSCOfEOG7QRR3J	Duplicated	DR_013686-RA	740.4	654
BUSCOfEOG7WX0KW	Duplicated	DR_003106-RA	930.1	528
BUSCOfEOG7SN8RW	Duplicated	DR_012509-RA	232.7	124
BUSCOfEOG7008JB	Duplicated	DR_010115-RA	1077.4	472
BUSCOfEOG7T1RKM	Duplicated	DR_009147-RA	1376.1	986
BUSCOfEOG7TQVCM	Duplicated	DR_004067-RA	188.9	124
BUSCOfEOG7X3R1P	Duplicated	DR_008167-RA	643.2	414
BUSCOfEOG7W6WZ8	Complete	DR_000926-RA	270	163
BUSCOfEOG7J9W22	Duplicated	DR_005734-RA	228.2	174
BUSCOfEOG7WX0HQ	Duplicated	DR_010013-RA	1807.5	1095
BUSCOfEOG7Q8CWQ	Duplicated	DR_001587-RA	1281.1	1107
BUSCOfEOG74J9HK	Duplicated	DR_007182-RA	673.4	578
BUSCOfEOG7X9GGC	Duplicated	DR_002587-RA	1581.6	958
BUSCOfEOG7VB2SH	Complete	DR_000961-RA	360.6	351
BUSCOfEOG7KQ2BG	Duplicated	DR_007355-RA	926.1	642
BUSCOfEOG74N5S4	Duplicated	DR_001095-RA	690.1	491
BUSCOfEOG7M3JBJ	Duplicated	DR_004881-RA	170.5	184
BUSCOfEOG73BVR6	Duplicated	DR_001732-RA	179.2	116
BUSCOfEOG7KQ29H	Duplicated	DR_013060-RA	966.8	713
BUSCOfEOG7K9KFM	Duplicated	DR_013633-RA	293.3	199
BUSCOfEOG7JMGNQ	Duplicated	DR_012491-RA	6263.2	4931
BUSCOfEOG7MH18Q	Duplicated	DR_001921-RA	389.2	226
BUSCOfEOG71RXW4	Duplicated	DR_003995-RA	964.7	889
BUSCOfEOG74FF9N	Duplicated	DR_011305-RA	556.4	389
BUSCOfEOG7MWH87	Duplicated	DR_011308-RA	829.4	584
BUSCOfEOG73JM5X	Duplicated	DR_007575-RA	376.3	320
BUSCOfEOG7X6M9G	Duplicated	DR_004090-RA	661.8	312
BUSCOfEOG7WQ84T	Duplicated	DR_002282-RA	259.1	159
BUSCOfEOG77DJGG	Duplicated	DR_002329-RA	645.3	418
BUSCOfEOG7ZKSKQ	Duplicated	DR_007847-RA	1031.8	547
BUSCOfEOG70S7FC	Complete	DR_009519-RA	761.2	486
BUSCOfEOG7HB5JX	Complete	DR_011111-RA	689.4	504
BUSCOfEOG7JMGRN	Complete	DR_013612-RA	253.5	193
BUSCOfEOG7GTTCX	Duplicated	DR_010516-RA	874.1	484
BUSCOfEOG78D7Z8	Duplicated	DR_008190-RA	244.7	118
BUSCOfEOG76MKMM	Duplicated	DR_002007-RA	422	271
BUSCOfEOG71VT48	Duplicated	DR_011574-RA	688.7	497
BUSCOfEOG7RV9QQ	Duplicated	DR_000326-RA	1146.2	728
BUSCOfEOG73RBPD	Duplicated	DR_012587-RA	338.2	174
BUSCOfEOG7TBCBV	Duplicated	DR_002564-RA	652.6	391
BUSCOfEOG7966RM	Duplicated	DR_010042-RA	1601.4	1326
BUSCOfEOG7P2Z1R	Duplicated	DR_013797-RA	769.9	556
BUSCOfEOG779P7W	Duplicated	DR_009737-RA	809.4	375
BUSCOfEOG7TJ3TD	Duplicated	DR_003637-RA	815.4	471
BUSCOfEOG75XGWD	Duplicated	DR_004463-RA	672.7	361
BUSCOfEOG799312	Duplicated	DR_010295-RA	597.8	377
BUSCOfEOG78WM1V	Duplicated	DR_009976-RA	941.6	607
BUSCOfEOG7M6DJC	Duplicated	DR_001464-RA	1061.9	528
BUSCOfEOG7HHX2C	Duplicated	DR_002328-RA	929.2	610
BUSCOfEOG77WWR0	Duplicated	DR_006520-RA	337.7	174
BUSCOfEOG7DC2FJ	Duplicated	DR_007727-RA	436.3	278
BUSCOfEOG722JJW	Duplicated	DR_007303-RA	454.6	442
BUSCOfEOG7VX94P	Duplicated	DR_004949-RA	914.8	612
BUSCOfEOG7PS1QF	Duplicated	DR_006004-RA	546.9	417
BUSCOfEOG7F7WKS	Duplicated	DR_003852-RA	1435.2	893
BUSCOfEOG7TTQMZ	Duplicated	DR_008973-RA	202.3	289
BUSCOfEOG7KM62S	Complete	DR_005119-RA	762	469
BUSCOfEOG7G7KXG	Complete	DR_001262-RA	1582.6	958
BUSCOfEOG7GXPKT	Duplicated	DR_012878-RA	1638.2	1310
BUSCOfEOG7D5B0C	Duplicated	DR_010131-RA	530.5	386
BUSCOfEOG7VB2QZ	Duplicated	DR_010522-RA	531.7	371
BUSCOfEOG7KDFKX	Duplicated	DR_006781-RA	1026.4	511
BUSCOfEOG79CZ7K	Duplicated	DR_003682-RA	1220	914
BUSCOfEOG7XPZGS	Duplicated	DR_009262-RA	602.8	329
BUSCOfEOG7H4F3M	Duplicated	DR_012862-RA	258.2	595
BUSCOfEOG7W9S6F	Duplicated	DR_003438-RA	294.2	204
BUSCOfEOG799312	Duplicated	DR_009977-RA	598.7	377
BUSCOfEOG7GJ6NN	Complete	DR_000324-RA	1039.2	579
BUSCOfEOG70KH1C	Duplicated	DR_011400-RA	357.8	299
BUSCOfEOG7FFN53	Duplicated	DR_004039-RA	162.4	95
BUSCOfEOG7TTQMZ	Duplicated	DR_004108-RA	137.8	302
BUSCOfEOG7FR7QW	Duplicated	DR_005569-RA	985.2	767
BUSCOfEOG7M98SZ	Duplicated	DR_005303-RA	381.6	243
BUSCOfEOG7P02TS	Duplicated	DR_012532-RA	603.8	394
BUSCOfEOG7MSMZD	Duplicated	DR_007786-RA	787.4	773
BUSCOfEOG7966RM	Duplicated	DR_003265-RA	1586.1	1323
BUSCOfEOG7WT4D5	Duplicated	DR_006406-RA	178.4	129
BUSCOfEOG7QC84G	Duplicated	DR_001057-RA	1233.6	945
BUSCOfEOG7DRJFG	Duplicated	DR_005710-RA	347.4	213
BUSCOfEOG741ZC1	Duplicated	DR_001165-RA	545.9	460
BUSCOfEOG7Z0K4S	Duplicated	DR_000291-RA	1040	1062
BUSCOfEOG7KH9V5	Duplicated	DR_000521-RA	574.8	367
BUSCOfEOG7J70QP	Duplicated	DR_010901-RA	748.3	441
BUSCOfEOG7G7KXF	Duplicated	DR_008550-RA	947.1	1064
BUSCOfEOG7C2RBK	Duplicated	DR_013857-RA	464.8	293
BUSCOfEOG7V76G0	Duplicated	DR_000361-RA	1883.4	1927
BUSCOfEOG7XSTP7	Duplicated	DR_004312-RA	981.1	624
BUSCOfEOG7V76G6	Duplicated	DR_008991-RA	1096.8	725
BUSCOfEOG7KSXMV	Duplicated	DR_006030-RA	917.3	668
BUSCOfEOG7MPRRD	Duplicated	DR_004544-RA	856.7	667
BUSCOfEOG7X9GK1	Duplicated	DR_003562-RA	390.3	189
BUSCOfEOG7RRFGJ	Duplicated	DR_012816-RA	1139.6	775
BUSCOfEOG7T1RKH	Duplicated	DR_001944-RA	1621.6	1355
BUSCOfEOG7380FP	Fragmented	DR_007402-RA	376.9	224
BUSCOfEOG7G7KXQ	Duplicated	DR_004199-RA	870	557
BUSCOfEOG7RFTT2	Duplicated	DR_009063-RA	858.4	600
BUSCOfEOG7ZWDC9	Duplicated	DR_000388-RA	490.3	257
BUSCOfEOG72ZCQ7	Duplicated	DR_002984-RA	657.4	401
BUSCOfEOG77DJK9	Complete	DR_013554-RA	163.9	84
BUSCOfEOG7PGF3B	Duplicated	DR_008281-RA	271.8	152
BUSCOfEOG7WT4C2	Duplicated	DR_013806-RA	370.9	238
BUSCOfEOG74TX7R	Duplicated	DR_003190-RA	869	677
BUSCOfEOG7MD4ZH	Duplicated	DR_012585-RA	935	759
BUSCOfEOG7GQZ3Z	Duplicated	DR_001606-RA	2341.7	1685
BUSCOfEOG71GB6Z	Duplicated	DR_005960-RA	262.7	158
BUSCOfEOG7712J5	Duplicated	DR_010622-RA	595.5	357
BUSCOfEOG77WWNJ	Duplicated	DR_011469-RA	720.3	609
BUSCOfEOG71CFZH	Duplicated	DR_005248-RA	278.3	176
BUSCOfEOG7Z0K5V	Duplicated	DR_008425-RA	799.4	424
BUSCOfEOG7K9KC2	Duplicated	DR_009822-RA	450.2	457
BUSCOfEOG7034T9	Duplicated	DR_012149-RA	751.1	479
BUSCOfEOG73JM5T	Duplicated	DR_002344-RA	427.6	297
BUSCOfEOG7VHT5Q	Duplicated	DR_006608-RA	362.4	738
BUSCOfEOG7SBP20	Duplicated	DR_006595-RA	141.9	106
BUSCOfEOG7QRR3J	Duplicated	DR_012818-RA	500.4	769
BUSCOfEOG79SF6H	Duplicated	DR_007156-RA	429.7	580
BUSCOfEOG7Z95XB	Duplicated	DR_002375-RA	289.4	213
BUSCOfEOG7HHX3R	Duplicated	DR_004579-RA	609.3	438
BUSCOfEOG7Z3FDD	Duplicated	DR_008659-RA	1010.7	482
BUSCOfEOG7FV415	Complete	DR_005638-RA	509.8	265
BUSCOfEOG7PZS7V	Duplicated	DR_001544-RA	528.1	364
BUSCOfEOG7TN04C	Duplicated	DR_013123-RA	308.4	282
BUSCOfEOG7CCC18	Complete	DR_005858-RA	847.7	651
BUSCOfEOG761C50	Complete	DR_002318-RA	702.6	452
BUSCOfEOG735492	Complete	DR_013866-RA	134.1	106
BUSCOfEOG7D59ZK	Duplicated	DR_004530-RA	435.4	312
BUSCOfEOG7TJ3VQ	Duplicated	DR_012238-RA	283.9	226
BUSCOfEOG7M3J9X	Complete	DR_010553-RA	390.9	228
BUSCOfEOG7PCJRV	Duplicated	DR_008295-RA	348.1	545
BUSCOfEOG7V4B9M	Duplicated	DR_001196-RA	392.1	294
BUSCOfEOG7T4MWD	Complete	DR_000997-RA	663.7	328
BUSCOfEOG7DRJF3	Duplicated	DR_008837-RA	305	195
BUSCOfEOG7P02TS	Duplicated	DR_003663-RA	593.4	335
BUSCOfEOG79KPPR	Duplicated	DR_001972-RA	1753.7	1339
BUSCOfEOG7MPRRD	Duplicated	DR_000694-RA	850.1	656
BUSCOfEOG793BMH	Duplicated	DR_013358-RA	371.2	235
BUSCOfEOG7NW6NW	Duplicated	DR_002786-RA	247.4	145
BUSCOfEOG71VT57	Complete	DR_006368-RA	330.9	165
BUSCOfEOG77M8ZR	Duplicated	DR_009164-RA	580.7	389
BUSCOfEOG71P2N2	Duplicated	DR_004341-RA	692.2	381
BUSCOfEOG7NCVD1	Duplicated	DR_002942-RA	994.7	587
BUSCOfEOG7TF7JJ	Complete	DR_007035-RA	1268.8	673
BUSCOfEOG7WQ81K	Duplicated	DR_000587-RA	1315.7	1491
BUSCOfEOG7PGF35	Duplicated	DR_002840-RA	259.9	201
BUSCOfEOG7K9KDQ	Duplicated	DR_006471-RA	1361.9	949
BUSCOfEOG7DFXP0	Duplicated	DR_007337-RA	828.2	480
BUSCOfEOG78WM31	Complete	DR_013154-RA	287	273
BUSCOfEOG7N63WB	Duplicated	DR_004625-RA	1440	938
BUSCOfEOG7M98SZ	Duplicated	DR_001363-RA	390.3	258
BUSCOfEOG7K3TX9	Complete	DR_007167-RA	706.7	443
BUSCOfEOG7TQVCM	Duplicated	DR_007747-RA	192.9	124
BUSCOfEOG7MWH56	Duplicated	DR_010874-RA	1916.9	1005
BUSCOfEOG7MH16T	Complete	DR_013365-RA	767.5	605
BUSCOfEOG72VHFD	Duplicated	DR_005123-RA	1181.3	832
BUSCOfEOG78M09C	Duplicated	DR_002859-RA	846.6	716
BUSCOfEOG7FNCHR	Duplicated	DR_006094-RA	759.3	471
BUSCOfEOG7QRR44	Duplicated	DR_003236-RA	777.7	443
BUSCOfEOG7G1VFR	Duplicated	DR_002922-RA	1210.8	859
BUSCOfEOG7J9W2D	Duplicated	DR_001261-RA	277.4	152
BUSCOfEOG7P2Z35	Duplicated	DR_002872-RA	503.1	321
BUSCOfEOG7TF7K9	Duplicated	DR_007278-RA	742	822
BUSCOfEOG7FZ099	Complete	DR_000957-RA	514.2	392
BUSCOfEOG71VT48	Duplicated	DR_009746-RA	691.8	499
BUSCOfEOG7C5MKN	Duplicated	DR_001117-RA	356.4	192
BUSCOfEOG70GMV4	Duplicated	DR_004956-RA	285.3	184
BUSCOfEOG71CFZD	Duplicated	DR_006292-RA	479.3	277
BUSCOfEOG79W9HQ	Duplicated	DR_004516-RA	361.8	175
BUSCOfEOG71GB6Z	Duplicated	DR_009025-RA	263.9	167
BUSCOfEOG77HDQJ	Duplicated	DR_012327-RA	736.9	513
BUSCOfEOG7KSXJ1	Duplicated	DR_007733-RA	1209.2	838
BUSCOfEOG7PCJTH	Duplicated	DR_011289-RA	460	264
BUSCOfEOG73JM5N	Duplicated	DR_013268-RA	362.5	298
BUSCOfEOG7KM623	Duplicated	DR_000249-RA	2271.9	1791
BUSCOfEOG7CNZQV	Duplicated	DR_004153-RA	746.7	415
BUSCOfEOG7SBNZS	Duplicated	DR_004854-RA	594	366
BUSCOfEOG7FJH7Z	Duplicated	DR_012364-RA	1442.3	864
BUSCOfEOG7WDNCD	Duplicated	DR_008627-RA	462.8	260
BUSCOfEOG7SJDGT	Duplicated	DR_012856-RA	371.3	201
BUSCOfEOG70KH18	Duplicated	DR_009040-RA	281.9	335
BUSCOfEOG7S4XJ3	Duplicated	DR_008798-RA	426.9	203
BUSCOfEOG7HTHR9	Duplicated	DR_011579-RA	1051.8	968
BUSCOfEOG7KQ29H	Duplicated	DR_012713-RA	968.1	712
BUSCOfEOG7SXWBR	Duplicated	DR_011996-RA	1706.4	1123
BUSCOfEOG71CFZ8	Complete	DR_000883-RA	338.1	211
BUSCOfEOG7KM623	Duplicated	DR_006392-RA	2273.2	1791
BUSCOfEOG7FBRS6	Complete	DR_000888-RA	972.5	1009
BUSCOfEOG7DJSW7	Duplicated	DR_009758-RA	652.2	548
BUSCOfEOG7HMS8K	Duplicated	DR_013453-RA	1193.7	725
BUSCOfEOG76MKJ7	Duplicated	DR_001141-RA	705.7	520
BUSCOfEOG7P02VP	Duplicated	DR_011225-RA	457.3	289
BUSCOfEOG78WM3S	Duplicated	DR_009346-RA	308.4	201
BUSCOfEOG72C5C8	Duplicated	DR_011794-RA	322.3	173
BUSCOfEOG7JHMDW	Duplicated	DR_013489-RA	1146.2	855
BUSCOfEOG7J70QP	Duplicated	DR_009652-RA	748.4	441
BUSCOfEOG71RXTM	Duplicated	DR_005822-RA	624.2	578
BUSCOfEOG79931N	Duplicated	DR_013386-RA	402.5	274
BUSCOfEOG77HDQJ	Duplicated	DR_003197-RA	757.4	513
BUSCOfEOG7JQC0X	Duplicated	DR_005289-RA	268.8	150
BUSCOfEOG7G1VG0	Duplicated	DR_012143-RA	1780.8	969
BUSCOfEOG7MPRR4	Duplicated	DR_012757-RA	437.6	307
BUSCOfEOG73NGDW	Duplicated	DR_012201-RA	412.2	258
BUSCOfEOG7V1G2Z	Duplicated	DR_013026-RA	425.1	344
BUSCOfEOG7T1RN4	Duplicated	DR_006889-RA	1253.4	771
BUSCOfEOG73JM40	Duplicated	DR_008276-RA	814.3	685
BUSCOfEOG7GXPR2	Duplicated	DR_004001-RA	273.6	135
BUSCOfEOG7W41MC	Duplicated	DR_006272-RA	1133.7	881
BUSCOfEOG747PX1	Duplicated	DR_009614-RA	255.1	138
BUSCOfEOG7008K9	Complete	DR_001705-RA	702.3	549
BUSCOfEOG72RN6K	Complete	DR_008529-RA	934.7	761
BUSCOfEOG76MKK1	Duplicated	DR_003841-RA	663.9	387
BUSCOfEOG7PZS5Q	Duplicated	DR_000363-RA	1478.3	1020
BUSCOfEOG7B3213	Fragmented	DR_009650-RA	200.9	99
BUSCOfEOG783N3N	Duplicated	DR_005353-RA	1347	1126
BUSCOfEOG7GBG58	Duplicated	DR_002690-RA	782.4	994
BUSCOfEOG7S4XJ3	Duplicated	DR_007944-RA	427	203
BUSCOfEOG7PK99N	Duplicated	DR_007891-RA	579.9	424
BUSCOfEOG7F7WJ5	Duplicated	DR_006085-RA	1568.3	1082
BUSCOfEOG7ZKSKQ	Duplicated	DR_005826-RA	1034.2	553
BUSCOfEOG7K0ZMR	Duplicated	DR_001954-RA	265.9	484
BUSCOfEOG72ZCQF	Duplicated	DR_002484-RA	809.9	515
BUSCOfEOG7J9W0C	Duplicated	DR_000394-RA	821.1	715
BUSCOfEOG71CFWG	Duplicated	DR_008709-RA	505.6	388
BUSCOfEOG73BVP8	Complete	DR_010218-RA	658.7	414
BUSCOfEOG706142	Duplicated	DR_013648-RA	201.4	113
BUSCOfEOG7SN8NM	Duplicated	DR_003015-RA	379.9	384
BUSCOfEOG7M6DGR	Duplicated	DR_010259-RA	1430.7	994
BUSCOfEOG7DC2G1	Duplicated	DR_007796-RA	471.9	367
BUSCOfEOG7GXPP8	Duplicated	DR_000068-RA	834.4	491
BUSCOfEOG7QK0P7	Complete	DR_000840-RA	367.4	293
BUSCOfEOG71RXW4	Duplicated	DR_012991-RA	950.1	812
BUSCOfEOG7VTDX5	Duplicated	DR_012663-RA	480	414
BUSCOfEOG71RXXP	Duplicated	DR_003611-RA	141.2	101
BUSCOfEOG73Z33M	Complete	DR_000994-RA	737.3	387
BUSCOfEOG7SN8MR	Duplicated	DR_006676-RA	1536.7	1341
BUSCOfEOG7BW0WH	Duplicated	DR_010667-RA	422.1	304
BUSCOfEOG72890P	Duplicated	DR_009004-RA	2307	1366
BUSCOfEOG7XDBRM	Duplicated	DR_010484-RA	670.7	359
BUSCOfEOG75TMNV	Duplicated	DR_002780-RA	528.1	464
BUSCOfEOG7RNKBD	Duplicated	DR_012283-RA	435.5	271
BUSCOfEOG73RBPK	Duplicated	DR_011102-RA	570.9	298
BUSCOfEOG7FJH92	Complete	DR_006383-RA	473	337
BUSCOfEOG78WM14	Duplicated	DR_011615-RA	1307.3	839
BUSCOfEOG7WHHNW	Complete	DR_009554-RA	277.5	148
BUSCOfEOG741ZDG	Duplicated	DR_006688-RA	435.1	254
BUSCOfEOG7W41M9	Duplicated	DR_012511-RA	1292.1	725
BUSCOfEOG7N37PR	Duplicated	DR_002125-RA	971.9	655
BUSCOfEOG7RBZMZ	Complete	DR_000872-RA	299.5	237
BUSCOfEOG7Z95XP	Duplicated	DR_010248-RA	317.5	178
BUSCOfEOG7KSXMF	Complete	DR_005082-RA	480.5	224
BUSCOfEOG7M3J7M	Duplicated	DR_006707-RA	1398.4	1048
BUSCOfEOG7V4B6Q	Duplicated	DR_002767-RA	3242.5	1676
BUSCOfEOG7G4QT6	Complete	DR_000886-RA	264.7	140
BUSCOfEOG79930X	Complete	DR_002199-RA	1190.3	724
BUSCOfEOG7QC854	Duplicated	DR_008454-RA	676.5	727
BUSCOfEOG7MSMZM	Duplicated	DR_008948-RA	661	349
BUSCOfEOG7SV166	Duplicated	DR_009726-RA	276.8	476
BUSCOfEOG76DV31	Duplicated	DR_007291-RA	1032.9	1130
BUSCOfEOG751NV3	Duplicated	DR_010420-RA	147.1	80
BUSCOfEOG776SZ7	Duplicated	DR_007004-RA	3077.7	2294
BUSCOfEOG7RFTRP	Duplicated	DR_003715-RA	599.2	729
BUSCOfEOG7PZS7V	Duplicated	DR_002108-RA	526.7	364
BUSCOfEOG7WQ84T	Duplicated	DR_001386-RA	257.5	160
BUSCOfEOG786HFQ	Duplicated	DR_009574-RA	318.6	188
BUSCOfEOG7M3J7T	Duplicated	DR_007290-RA	2196.6	1629
BUSCOfEOG74R203	Duplicated	DR_007708-RA	1177	747
BUSCOfEOG7JHMH0	Duplicated	DR_010496-RA	611.4	530
BUSCOfEOG7FV3ZX	Duplicated	DR_002308-RA	1594.7	828
BUSCOfEOG7XSTP7	Duplicated	DR_006871-RA	984.4	624
BUSCOfEOG7XSTQC	Complete	DR_001161-RA	660.1	476
BUSCOfEOG7GTTDX	Duplicated	DR_007814-RA	396	292
BUSCOfEOG7FJH8G	Duplicated	DR_013279-RA	858.6	566
BUSCOfEOG7RBZN0	Complete	DR_012358-RA	1161.1	982
BUSCOfEOG71GB4R	Duplicated	DR_009761-RA	1025.2	742
BUSCOfEOG7NSBD8	Duplicated	DR_010606-RA	582.4	367
BUSCOfEOG78SQSK	Complete	DR_003550-RA	1235.3	698
BUSCOfEOG72C58R	Duplicated	DR_012516-RA	797.9	452
BUSCOfEOG779P7X	Duplicated	DR_011636-RA	292.9	253
BUSCOfEOG79932M	Duplicated	DR_003972-RA	360.5	208
BUSCOfEOG7VHT6S	Duplicated	DR_013244-RA	786.2	403
BUSCOfEOG77Q571	Duplicated	DR_007623-RA	371.7	238
BUSCOfEOG78WM3S	Duplicated	DR_008693-RA	312.2	217
BUSCOfEOG7VB2QK	Complete	DR_000969-RA	884	663
BUSCOfEOG7HHX2C	Duplicated	DR_001434-RA	934.2	610
BUSCOfEOG77DJJM	Duplicated	DR_012637-RA	352.1	242
BUSCOfEOG73Z34Z	Duplicated	DR_004754-RA	340.1	246
BUSCOfEOG70CRGF	Complete	DR_005100-RA	1057.2	606
BUSCOfEOG72VHFN	Duplicated	DR_006394-RA	979.4	680
BUSCOfEOG722JJC	Duplicated	DR_008769-RA	931.7	556
BUSCOfEOG7ZKSQH	Duplicated	DR_007419-RA	227	147
BUSCOfEOG72RN9W	Duplicated	DR_003934-RA	350.1	224
BUSCOfEOG7GXPMZ	Duplicated	DR_011081-RA	846.7	439
BUSCOfEOG751NQG	Duplicated	DR_001564-RA	891.6	519
BUSCOfEOG7QRR44	Duplicated	DR_011001-RA	776.7	443
BUSCOfEOG7WDNB3	Duplicated	DR_006594-RA	517.6	1033
BUSCOfEOG7CCC10	Duplicated	DR_009462-RA	1003.7	844
BUSCOfEOG741ZD8	Duplicated	DR_010478-RA	394.4	231
BUSCOfEOG7W9S4R	Duplicated	DR_009297-RA	684.8	504
BUSCOfEOG7P02T6	Duplicated	DR_009961-RA	526.5	401
BUSCOfEOG7FR7RC	Duplicated	DR_013231-RA	1147.2	843
BUSCOfEOG7QNVVM	Duplicated	DR_009879-RA	1147.8	633
BUSCOfEOG780RXX	Duplicated	DR_006215-RA	409.6	336
BUSCOfEOG7RJQ36	Duplicated	DR_001802-RA	372.1	234
BUSCOfEOG7FJH7X	Duplicated	DR_004303-RA	1961.3	876
BUSCOfEOG7NKKXH	Duplicated	DR_010250-RA	205.8	196
BUSCOfEOG7VTDX5	Duplicated	DR_004898-RA	481.3	415
BUSCOfEOG7GQZ45	Duplicated	DR_008110-RA	1194.9	1136
BUSCOfEOG7PK96V	Duplicated	DR_010710-RA	4901.8	2349
BUSCOfEOG7T7H3X	Duplicated	DR_012185-RA	488.5	304
BUSCOfEOG7327X3	Duplicated	DR_009441-RA	1089.2	1168
BUSCOfEOG7VHT6T	Duplicated	DR_006147-RA	775.5	449
BUSCOfEOG7CK3H3	Duplicated	DR_003023-RA	252.6	356
BUSCOfEOG7M6DGR	Duplicated	DR_010626-RA	1431.9	994
BUSCOfEOG72894C	Duplicated	DR_008776-RA	252.7	167
BUSCOfEOG7QVMCR	Duplicated	DR_012766-RA	412.6	315
BUSCOfEOG71K6FR	Duplicated	DR_002060-RA	300.3	169
BUSCOfEOG7N0CH8	Duplicated	DR_008842-RA	238.6	170
BUSCOfEOG7TJ3TH	Duplicated	DR_003124-RA	472.5	350
BUSCOfEOG7N0CHT	Duplicated	DR_004290-RA	251	139
BUSCOfEOG71K6C8	Duplicated	DR_003653-RA	723.8	439
BUSCOfEOG7K0ZQ9	Duplicated	DR_011077-RA	469.7	288
BUSCOfEOG7K3TW2	Duplicated	DR_002310-RA	566.5	407
BUSCOfEOG79W9GP	Duplicated	DR_001799-RA	443.9	246
BUSCOfEOG73V6VZ	Duplicated	DR_011998-RA	698.7	459
BUSCOfEOG75XGZ9	Duplicated	DR_001537-RA	311.1	221
BUSCOfEOG7SBP0G	Duplicated	DR_013509-RA	322.3	203
BUSCOfEOG72RNB6	Duplicated	DR_009990-RA	184.8	77
BUSCOfEOG75XGVQ	Duplicated	DR_013224-RA	1416.1	913
BUSCOfEOG7ZPNVK	Duplicated	DR_009409-RA	596.7	427
BUSCOfEOG7T4MVB	Duplicated	DR_005111-RA	952.3	647
BUSCOfEOG7J70SV	Complete	DR_000980-RA	416.6	278
BUSCOfEOG7SJDDG	Duplicated	DR_012027-RA	675.8	610
BUSCOfEOG72VHGT	Duplicated	DR_009400-RA	732.4	328
BUSCOfEOG7K0ZQ3	Duplicated	DR_002532-RA	877.5	509
BUSCOfEOG7SFJ59	Duplicated	DR_003767-RA	1513.1	1289
BUSCOfEOG74TX7J	Duplicated	DR_011656-RA	1290.6	776
BUSCOfEOG7NSBBG	Duplicated	DR_013238-RA	684.9	515
BUSCOfEOG7327X3	Duplicated	DR_005757-RA	996.2	1090
BUSCOfEOG74J9JF	Duplicated	DR_005312-RA	711.6	359
BUSCOfEOG7NW6NN	Duplicated	DR_007409-RA	307.9	150
BUSCOfEOG7GTTD5	Complete	DR_002591-RA	632.2	387
BUSCOfEOG7NW6K5	Duplicated	DR_008265-RA	498.1	419
BUSCOfEOG7J44JS	Duplicated	DR_005005-RA	293.3	274
BUSCOfEOG71GB6W	Duplicated	DR_004723-RA	313.7	239
BUSCOfEOG76DV1T	Duplicated	DR_000364-RA	1126.7	979
BUSCOfEOG7VB2RJ	Duplicated	DR_011986-RA	466.5	334
BUSCOfEOG7K6Q66	Duplicated	DR_002141-RA	441.8	345
BUSCOfEOG76HQBV	Fragmented	DR_006593-RA	566.2	361
BUSCOfEOG7TJ3V6	Complete	DR_009828-RA	507.8	271
BUSCOfEOG7VQJNP	Duplicated	DR_006861-RA	986.6	684
BUSCOfEOG7RBZK3	Duplicated	DR_012745-RA	533.2	393
BUSCOfEOG75F4P2	Duplicated	DR_002458-RA	498.9	506
BUSCOfEOG7RBZJM	Duplicated	DR_012012-RA	936.1	716
BUSCOfEOG73V6VV	Complete	DR_008516-RA	818.9	603
BUSCOfEOG79GTJ1	Duplicated	DR_002654-RA	648.3	347
BUSCOfEOG74N5VD	Duplicated	DR_007738-RA	190.7	121
BUSCOfEOG7D2FRW	Duplicated	DR_008255-RA	1052.7	840
BUSCOfEOG776SZ7	Duplicated	DR_002631-RA	3090	2294
BUSCOfEOG7TF7MB	Complete	DR_001101-RA	540	332
BUSCOfEOG7NW6JS	Duplicated	DR_007332-RA	831.5	675
BUSCOfEOG7K3TW0	Duplicated	DR_002738-RA	611.5	413
BUSCOfEOG7HB5K9	Duplicated	DR_000274-RA	695.5	512
BUSCOfEOG7W6WV5	Duplicated	DR_004078-RA	1122.7	785
BUSCOfEOG7HXD2Z	Duplicated	DR_000033-RA	410.1	256
BUSCOfEOG7M3J7N	Duplicated	DR_007404-RA	1390.3	1099
BUSCOfEOG7FZ06K	Duplicated	DR_007368-RA	1852.4	1509
BUSCOfEOG7CK3JD	Duplicated	DR_012606-RA	399.7	251
BUSCOfEOG73NGGZ	Complete	DR_013518-RA	185.7	93
BUSCOfEOG71K6BJ	Duplicated	DR_001469-RA	812.4	619
BUSCOfEOG7V76HM	Duplicated	DR_011951-RA	405.1	304
BUSCOfEOG7FZ07M	Duplicated	DR_004558-RA	1098.4	458
BUSCOfEOG783N5X	Duplicated	DR_005139-RA	610.2	419
BUSCOfEOG715QCD	Duplicated	DR_010260-RA	2012	1423
BUSCOfEOG78D7Z8	Duplicated	DR_006669-RA	244.7	117
BUSCOfEOG7HXD2Z	Duplicated	DR_004664-RA	410.2	255
BUSCOfEOG7Z0K74	Duplicated	DR_010511-RA	419.4	260
BUSCOfEOG7KH9Z0	Duplicated	DR_012756-RA	469.6	306
BUSCOfEOG7W41MC	Duplicated	DR_004422-RA	1136.7	881
BUSCOfEOG77DJGG	Duplicated	DR_001435-RA	645.5	418
BUSCOfEOG7J9W2D	Duplicated	DR_005318-RA	279.6	168
BUSCOfEOG7DC2G1	Duplicated	DR_001093-RA	474.6	408
BUSCOfEOG7FBRTR	Duplicated	DR_012413-RA	562	369
BUSCOfEOG75B8DM	Complete	DR_000278-RA	1724.6	1187
BUSCOfEOG7GXPPN	Duplicated	DR_003440-RA	508.6	334
BUSCOfEOG7FBRWV	Duplicated	DR_004441-RA	168.2	100
BUSCOfEOG712V6Z	Duplicated	DR_010213-RA	449.6	224
BUSCOfEOG7HB5K7	Duplicated	DR_012047-RA	505.4	423
BUSCOfEOG7XM36Z	Duplicated	DR_006930-RA	856.4	586
BUSCOfEOG73FQW6	Duplicated	DR_012442-RA	1002.7	824
BUSCOfEOG7V1G0D	Duplicated	DR_012078-RA	911.2	534
BUSCOfEOG7647B5	Complete	DR_005454-RA	1431.7	716
BUSCOfEOG783N68	Duplicated	DR_000392-RA	547.8	468
BUSCOfEOG77DJF5	Duplicated	DR_012551-RA	1243.4	965
BUSCOfEOG7MKWGD	Duplicated	DR_006796-RA	711.4	397
BUSCOfEOG7SJDGJ	Duplicated	DR_007896-RA	348.5	213
BUSCOfEOG7XPZJ6	Duplicated	DR_002892-RA	396	233
BUSCOfEOG7ZPNWZ	Duplicated	DR_007172-RA	433.6	423
BUSCOfEOG77M8XG	Duplicated	DR_002479-RA	1203.1	606
BUSCOfEOG7G1VFV	Duplicated	DR_000632-RA	1212.4	586
BUSCOfEOG7M0P2N	Duplicated	DR_003248-RA	576.1	312
BUSCOfEOG7SV15G	Duplicated	DR_009591-RA	601.6	320
BUSCOfEOG7ZD251	Duplicated	DR_007929-RA	535	364
BUSCOfEOG7KDFPN	Duplicated	DR_013715-RA	292.2	220
BUSCOfEOG744TK7	Duplicated	DR_006658-RA	754.9	487
BUSCOfEOG7BS4KJ	Duplicated	DR_007190-RA	634.8	457
BUSCOfEOG7T7H3X	Duplicated	DR_013835-RA	489	304
BUSCOfEOG77T1GJ	Duplicated	DR_007384-RA	496.5	255
BUSCOfEOG7G4QSH	Duplicated	DR_013592-RA	515.4	347
BUSCOfEOG7W41NN	Duplicated	DR_013744-RA	398.1	306
BUSCOfEOG7MD51P	Duplicated	DR_009352-RA	398	220
BUSCOfEOG76MKJK	Duplicated	DR_005506-RA	580	409
BUSCOfEOG7JX3CZ	Duplicated	DR_008399-RA	736.4	529
BUSCOfEOG7FNCHR	Duplicated	DR_003343-RA	759.1	469
BUSCOfEOG7ZKSMC	Duplicated	DR_008732-RA	1016.8	504
BUSCOfEOG7FJH8G	Duplicated	DR_005566-RA	859.4	566
BUSCOfEOG7R2BVR	Duplicated	DR_007730-RA	438.1	446
BUSCOfEOG7CK3KJ	Duplicated	DR_001819-RA	248.2	180
BUSCOfEOG7NGQMX	Complete	DR_007614-RA	723.6	553
BUSCOfEOG7K0ZQ3	Duplicated	DR_000061-RA	831.1	492
BUSCOfEOG7PK977	Duplicated	DR_008650-RA	550.1	589
BUSCOfEOG7G7KZ1	Complete	DR_007971-RA	1813.4	1105
BUSCOfEOG7RV9S0	Duplicated	DR_006114-RA	662.1	335
BUSCOfEOG751NSQ	Duplicated	DR_009193-RA	219.1	146
BUSCOfEOG7K9KD3	Duplicated	DR_002774-RA	635.5	473
BUSCOfEOG7VHT8Z	Duplicated	DR_007487-RA	193.8	295
BUSCOfEOG7PS1RV	Complete	DR_009821-RA	574.4	311
BUSCOfEOG7R5729	Duplicated	DR_008338-RA	729.5	485
BUSCOfEOG76X6BV	Duplicated	DR_012627-RA	404.1	331
BUSCOfEOG7X9GJ0	Fragmented	DR_006231-RA	284.9	155
BUSCOfEOG744TMD	Duplicated	DR_006575-RA	475.7	394
BUSCOfEOG7712J9	Duplicated	DR_013021-RA	574.4	337
BUSCOfEOG7X3R3C	Duplicated	DR_010300-RA	142	152
BUSCOfEOG7SN8PR	Duplicated	DR_008983-RA	460	314
BUSCOfEOG72G1H6	Duplicated	DR_005359-RA	772.5	810
BUSCOfEOG7GTTG0	Duplicated	DR_006648-RA	373.3	219
BUSCOfEOG7DZ8V4	Duplicated	DR_010885-RA	925.4	493
BUSCOfEOG725DVD	Duplicated	DR_011994-RA	635.8	425
BUSCOfEOG7034TC	Duplicated	DR_013034-RA	606.2	399
BUSCOfEOG793BMH	Duplicated	DR_006552-RA	272.1	164
BUSCOfEOG71RXT9	Duplicated	DR_012777-RA	1025.1	672
BUSCOfEOG7BGHWP	Duplicated	DR_002053-RA	657.2	360
BUSCOfEOG780RVR	Duplicated	DR_013531-RA	1682.5	1009
BUSCOfEOG7MKWFS	Duplicated	DR_006086-RA	1167.5	559
BUSCOfEOG7X9GKD	Complete	DR_001667-RA	258.4	167
BUSCOfEOG7P5T9P	Complete	DR_005056-RA	778.7	450
BUSCOfEOG757D6F	Duplicated	DR_013630-RA	1095.2	691
BUSCOfEOG71K6CX	Duplicated	DR_013226-RA	700.2	553
BUSCOfEOG7CG78C	Duplicated	DR_010906-RA	470.3	330
BUSCOfEOG7K9KD3	Duplicated	DR_000373-RA	653.4	473
BUSCOfEOG7P5TBG	Duplicated	DR_001122-RA	684.6	678
BUSCOfEOG715QG8	Complete	DR_000758-RA	331.4	266
BUSCOfEOG7SFJ5S	Duplicated	DR_011709-RA	110.6	430
BUSCOfEOG7FZ06K	Duplicated	DR_003865-RA	1861.1	1509
BUSCOfEOG7BKD38	Complete	DR_003377-RA	1519.6	763
BUSCOfEOG7J70QG	Duplicated	DR_010797-RA	1037.6	543
BUSCOfEOG79KPR7	Duplicated	DR_006150-RA	696.7	380
BUSCOfEOG70PC60	Duplicated	DR_010547-RA	1107.9	719
BUSCOfEOG7WMCVV	Duplicated	DR_009109-RA	417.8	336
BUSCOfEOG7XDBQN	Duplicated	DR_005346-RA	667.1	481
BUSCOfEOG7D867D	Duplicated	DR_004944-RA	583.5	374
BUSCOfEOG7KWSS5	Fragmented	DR_013964-RA	252.4	218
BUSCOfEOG7V1G00	Duplicated	DR_008931-RA	1192.5	765
BUSCOfEOG7T4MTT	Complete	DR_012778-RA	725.3	549
BUSCOfEOG7DNP5M	Duplicated	DR_004822-RA	391.9	296
BUSCOfEOG7TTQKB	Duplicated	DR_000398-RA	563.1	246
BUSCOfEOG7CRV0F	Duplicated	DR_002440-RA	745	442
BUSCOfEOG7WDNB3	Duplicated	DR_000354-RA	1224.9	1025
BUSCOfEOG7034TC	Duplicated	DR_006855-RA	495.1	435
BUSCOfEOG79GTFQ	Duplicated	DR_007955-RA	1591	1248
BUSCOfEOG7WQ856	Duplicated	DR_007389-RA	225.3	225
BUSCOfEOG76QFST	Duplicated	DR_000721-RA	575.2	389
BUSCOfEOG718KQX	Complete	DR_000856-RA	312.2	203
BUSCOfEOG7ZD27J	Duplicated	DR_007533-RA	225.7	132
BUSCOfEOG7DVDN4	Duplicated	DR_003926-RA	680.1	425
BUSCOfEOG7ZGXCZ	Duplicated	DR_001863-RA	677.8	400
BUSCOfEOG7TTQH0	Complete	DR_005501-RA	1319	1195
BUSCOfEOG7HB5M4	Duplicated	DR_013022-RA	594.2	354
BUSCOfEOG786HCW	Complete	DR_008966-RA	869.2	519
BUSCOfEOG76TB15	Duplicated	DR_012395-RA	668.2	527
BUSCOfEOG72C58R	Duplicated	DR_005006-RA	708.6	425
BUSCOfEOG7J44G9	Duplicated	DR_010247-RA	955.1	674
BUSCOfEOG7C8GSW	Complete	DR_009913-RA	681.4	306
BUSCOfEOG7W41P8	Duplicated	DR_004630-RA	510.1	406
BUSCOfEOG7HB5JW	Duplicated	DR_007811-RA	575	642
BUSCOfEOG76QFTN	Duplicated	DR_001570-RA	528.3	300
BUSCOfEOG7WHHKZ	Complete	DR_001094-RA	548.6	364
BUSCOfEOG7W9S51	Duplicated	DR_010503-RA	405.4	238
BUSCOfEOG73RBPD	Duplicated	DR_006314-RA	338.2	175
BUSCOfEOG79W9HQ	Duplicated	DR_000664-RA	266.7	141
BUSCOfEOG76TB4Q	Duplicated	DR_008911-RA	211.1	149
BUSCOfEOG7WQ856	Duplicated	DR_003845-RA	230.5	225
BUSCOfEOG7SV148	Duplicated	DR_002424-RA	951	579
BUSCOfEOG7DC2DF	Duplicated	DR_001084-RA	974.2	533
BUSCOfEOG7J44MH	Complete	DR_013750-RA	876.1	581
BUSCOfEOG7V76FS	Duplicated	DR_011415-RA	882.4	585
BUSCOfEOG7CNZTF	Duplicated	DR_002338-RA	266.2	169
BUSCOfEOG78SQTC	Complete	DR_007302-RA	602.6	483
BUSCOfEOG72G1KS	Duplicated	DR_010400-RA	340.3	162
BUSCOfEOG757D9B	Duplicated	DR_001579-RA	225.8	154
BUSCOfEOG7SJDFS	Duplicated	DR_007321-RA	476.5	357
BUSCOfEOG7HHX4K	Duplicated	DR_009895-RA	227.9	128
BUSCOfEOG7GXPPZ	Duplicated	DR_000189-RA	395.8	339
BUSCOfEOG7GBG70	Duplicated	DR_005621-RA	704.5	374
BUSCOfEOG761C34	Duplicated	DR_004618-RA	1260.9	836
BUSCOfEOG7DJSVM	Duplicated	DR_012619-RA	1374.2	865
BUSCOfEOG7W9S33	Complete	DR_005101-RA	1544.5	1065
BUSCOfEOG7CK3JD	Duplicated	DR_011690-RA	399	251
BUSCOfEOG7G7KXQ	Duplicated	DR_006002-RA	863.4	561
BUSCOfEOG7KQ2BG	Duplicated	DR_003879-RA	1013.6	680
BUSCOfEOG73V6XZ	Duplicated	DR_000341-RA	224.1	142
BUSCOfEOG7FR7R3	Duplicated	DR_000636-RA	1772.5	988
BUSCOfEOG7D2FRW	Duplicated	DR_001335-RA	1049.6	838
BUSCOfEOG7T7H2J	Duplicated	DR_012046-RA	295.9	585
BUSCOfEOG7J44H4	Duplicated	DR_007632-RA	941.4	612
BUSCOfEOG73Z333	Duplicated	DR_003455-RA	1432.4	935
BUSCOfEOG7MPRRK	Duplicated	DR_009753-RA	519.8	404
BUSCOfEOG79932M	Duplicated	DR_013019-RA	354.5	208
BUSCOfEOG7J1896	Complete	DR_012987-RA	842.8	650
BUSCOfEOG7TXKRP	Duplicated	DR_006598-RA	972.4	493
BUSCOfEOG75J0WD	Duplicated	DR_013115-RA	1878.8	1213
BUSCOfEOG7TTQKC	Duplicated	DR_007398-RA	374.6	227
BUSCOfEOG7WMCVV	Duplicated	DR_001471-RA	418.1	335
BUSCOfEOG7TTQJT	Complete	DR_012142-RA	874.1	615
BUSCOfEOG71K6D7	Duplicated	DR_004539-RA	802	417
BUSCOfEOG7JQC04	Duplicated	DR_003131-RA	379.2	251
BUSCOfEOG7TN04K	Duplicated	DR_000693-RA	716	518
BUSCOfEOG7XDBSV	Duplicated	DR_003238-RA	453.6	235
BUSCOfEOG7GQZ45	Duplicated	DR_000128-RA	1147.4	1136
BUSCOfEOG7PCJSB	Duplicated	DR_006125-RA	1236.5	1038
BUSCOfEOG7VMPFD	Complete	DR_001733-RA	801.2	504
BUSCOfEOG71P2KM	Duplicated	DR_013004-RA	1314.8	659
BUSCOfEOG7647D5	Complete	DR_001029-RA	489	611
BUSCOfEOG7B05NN	Complete	DR_012859-RA	1141.5	819
BUSCOfEOG735483	Duplicated	DR_009042-RA	348.1	223
BUSCOfEOG7HHX4K	Duplicated	DR_003903-RA	230	129
BUSCOfEOG77HDQH	Duplicated	DR_003745-RA	635.7	340
BUSCOfEOG741Z9G	Duplicated	DR_001422-RA	1253.8	1181
BUSCOfEOG7W9S43	Duplicated	DR_010908-RA	678.6	495
BUSCOfEOG74N5RB	Duplicated	DR_011536-RA	1063.4	705
BUSCOfEOG7N0CDH	Duplicated	DR_009179-RA	1101.9	545
BUSCOfEOG74N5VT	Duplicated	DR_002793-RA	217	188
BUSCOfEOG7J44KB	Duplicated	DR_007471-RA	382.5	249
BUSCOfEOG7QC87H	Duplicated	DR_010835-RA	296.9	162
BUSCOfEOG773XQR	Duplicated	DR_007516-RA	1164.7	642
BUSCOfEOG7B5X74	Duplicated	DR_004523-RA	531.1	331
BUSCOfEOG7H79BV	Complete	DR_012051-RA	702.2	519
BUSCOfEOG7BGHVG	Duplicated	DR_013508-RA	1508	1045
BUSCOfEOG79KPPM	Complete	DR_008783-RA	2133.1	1404
BUSCOfEOG7BGHV7	Duplicated	DR_012273-RA	1493.3	770
BUSCOfEOG779P6J	Duplicated	DR_011098-RA	1393.4	878
BUSCOfEOG706108	Duplicated	DR_001068-RA	2462.6	1773
BUSCOfEOG718KPK	Duplicated	DR_011853-RA	918	456
BUSCOfEOG7SV148	Duplicated	DR_004608-RA	950.9	580
BUSCOfEOG793BHT	Duplicated	DR_012631-RA	711.7	556
BUSCOfEOG71CFZH	Duplicated	DR_002787-RA	278.4	165
BUSCOfEOG7N63VZ	Duplicated	DR_010411-RA	1368.5	1331
BUSCOfEOG790GCB	Duplicated	DR_010310-RA	300.4	270
BUSCOfEOG7V1G0D	Duplicated	DR_013862-RA	914.7	534
BUSCOfEOG7PS1RB	Duplicated	DR_001128-RA	675.7	310
BUSCOfEOG77DJHZ	Duplicated	DR_006107-RA	738.7	481
BUSCOfEOG70610P	Duplicated	DR_008107-RA	805.2	714
BUSCOfEOG7C8GT4	Duplicated	DR_010380-RA	342.1	211
BUSCOfEOG7T1RKK	Duplicated	DR_006076-RA	1071.7	1186
BUSCOfEOG7G4QPR	Duplicated	DR_004697-RA	986.5	651
BUSCOfEOG7BW0T0	Duplicated	DR_004690-RA	1866.4	1147
BUSCOfEOG7WT4D3	Duplicated	DR_013062-RA	191.9	153
BUSCOfEOG7DRJFG	Duplicated	DR_006856-RA	306.5	186
BUSCOfEOG7DFXNZ	Duplicated	DR_005292-RA	802.7	502
BUSCOfEOG7QC871	Duplicated	DR_011830-RA	685	392
BUSCOfEOG7HHX1P	Duplicated	DR_012076-RA	1026.3	612
BUSCOfEOG7SN8N7	Duplicated	DR_012662-RA	969.8	629
BUSCOfEOG75XGVN	Duplicated	DR_012476-RA	983.3	556
BUSCOfEOG7HMS90	Complete	DR_004059-RA	1368.9	903
BUSCOfEOG7PK96V	Duplicated	DR_010685-RA	4917	2349
BUSCOfEOG7TJ3T5	Duplicated	DR_010204-RA	476.7	373
BUSCOfEOG74N5S4	Duplicated	DR_007794-RA	853	568
BUSCOfEOG7W9S4R	Duplicated	DR_013345-RA	686.5	514
BUSCOfEOG7CVQ6R	Duplicated	DR_012719-RA	693.5	431
BUSCOfEOG7G4QQG	Duplicated	DR_006077-RA	760.4	454
BUSCOfEOG72G1JR	Duplicated	DR_001496-RA	728.8	564
BUSCOfEOG7GBG86	Duplicated	DR_002763-RA	393.9	184
BUSCOfEOG73281W	Duplicated	DR_011612-RA	256.5	148
BUSCOfEOG789CM7	Complete	DR_000841-RA	617.9	455
BUSCOfEOG79SF7X	Fragmented	DR_011717-RA	172.4	181
BUSCOfEOG7W41P8	Duplicated	DR_013624-RA	526.6	431
BUSCOfEOG7VMPGS	Duplicated	DR_012567-RA	455	285
BUSCOfEOG7Q2NHQ	Duplicated	DR_010144-RA	279.8	229
BUSCOfEOG7P2Z3B	Duplicated	DR_012368-RA	557.9	290
BUSCOfEOG79PJZ1	Duplicated	DR_009030-RA	576.7	438
BUSCOfEOG75XGVN	Duplicated	DR_002248-RA	986.1	556
BUSCOfEOG7NW6JR	Duplicated	DR_010143-RA	891.4	656
BUSCOfEOG7ZD251	Duplicated	DR_006593-RA	535.6	365
BUSCOfEOG7034SB	Duplicated	DR_002048-RA	884.3	650
BUSCOfEOG715QCD	Duplicated	DR_010627-RA	2008.5	1424
BUSCOfEOG7B05P0	Complete	DR_005053-RA	999.8	745
BUSCOfEOG71GB3B	Duplicated	DR_007630-RA	893.1	847
BUSCOfEOG7DRJBS	Duplicated	DR_006342-RA	1742.6	1392
BUSCOfEOG78SQSW	Duplicated	DR_013094-RA	689.8	460
BUSCOfEOG79CZ70	Duplicated	DR_001403-RA	1287.9	961
BUSCOfEOG7ZKSMM	Complete	DR_003385-RA	358.9	408
BUSCOfEOG7P2Z1R	Duplicated	DR_005841-RA	658.8	594
BUSCOfEOG7TJ3SJ	Duplicated	DR_003971-RA	906.5	613
BUSCOfEOG73BVPZ	Duplicated	DR_006803-RA	325.9	267
BUSCOfEOG7G4QPG	Duplicated	DR_012096-RA	1261.4	799
BUSCOfEOG7W9S31	Duplicated	DR_005222-RA	1454.7	1064
BUSCOfEOG7SBP0G	Duplicated	DR_008664-RA	324.6	203
BUSCOfEOG751NSN	Duplicated	DR_001326-RA	319.7	181
BUSCOfEOG7X3R0Z	Duplicated	DR_000770-RA	875.9	705
BUSCOfEOG7PCJRS	Duplicated	DR_010029-RA	940.3	764
BUSCOfEOG7H4F3P	Duplicated	DR_000395-RA	330.9	646
BUSCOfEOG735483	Duplicated	DR_005944-RA	351.7	222
BUSCOfEOG7JT779	Duplicated	DR_010920-RA	352.1	242
BUSCOfEOG7FNCGS	Complete	DR_012575-RA	2235.2	1087
BUSCOfEOG7N63WV	Duplicated	DR_003168-RA	718.1	618
BUSCOfEOG7FJH7X	Duplicated	DR_006862-RA	2000.6	883
BUSCOfEOG7M6DK3	Duplicated	DR_012236-RA	144.9	377
BUSCOfEOG747PV3	Duplicated	DR_007897-RA	334.1	223
BUSCOfEOG7KQ2D5	Complete	DR_005434-RA	319.4	186
BUSCOfEOG7XDBSF	Duplicated	DR_006665-RA	643.9	446
BUSCOfEOG7XH6ZR	Complete	DR_009705-RA	935.8	666
BUSCOfEOG78D7VT	Duplicated	DR_000443-RA	987	591
BUSCOfEOG79KPS5	Complete	DR_008539-RA	370.2	289
BUSCOfEOG7CK3GC	Duplicated	DR_006700-RA	1068.2	718
BUSCOfEOG77M8ZR	Duplicated	DR_008004-RA	574.1	388
BUSCOfEOG76DV31	Duplicated	DR_012450-RA	1014.8	1461
BUSCOfEOG7FBRTR	Duplicated	DR_003174-RA	567.7	369
BUSCOfEOG77T1G6	Complete	DR_007017-RA	1203	782
BUSCOfEOG71K6BJ	Duplicated	DR_009111-RA	818.2	634
BUSCOfEOG7Z95XS	Duplicated	DR_002520-RA	217	254
BUSCOfEOG76TB2T	Fragmented	DR_001194-RA	292.7	173
BUSCOfEOG73JM46	Duplicated	DR_006786-RA	1114.2	581
BUSCOfEOG7SJDGM	Duplicated	DR_004430-RA	352.4	154
BUSCOfEOG712V6Z	Duplicated	DR_004126-RA	449.2	224
BUSCOfEOG75MW6R	Duplicated	DR_003624-RA	353.5	304
BUSCOfEOG7R2BVR	Duplicated	DR_013192-RA	426.6	438
BUSCOfEOG7V76FR	Complete	DR_013724-RA	655.2	437
BUSCOfEOG72VHFB	Duplicated	DR_013763-RA	1929.1	1193
BUSCOfEOG72G1KS	Duplicated	DR_001230-RA	338.2	162
BUSCOfEOG7B31WW	Complete	DR_007978-RA	751.9	543
BUSCOfEOG747PWJ	Duplicated	DR_002249-RA	237.8	186
BUSCOfEOG74R21C	Complete	DR_000298-RA	806.1	578
BUSCOfEOG71ZPBX	Duplicated	DR_010448-RA	517.8	300
BUSCOfEOG7SN8N7	Duplicated	DR_004897-RA	968.9	629
BUSCOfEOG7RNK98	Complete	DR_012089-RA	617.3	361
BUSCOfEOG7BS4JW	Duplicated	DR_009953-RA	915.4	985
BUSCOfEOG786HC2	Duplicated	DR_006720-RA	724	529
BUSCOfEOG7Z3FDQ	Complete	DR_012750-RA	594	508
BUSCOfEOG793BHK	Duplicated	DR_012980-RA	1130.1	549
BUSCOfEOG78M09B	Duplicated	DR_009455-RA	1393.4	1129
BUSCOfEOG7QC85Z	Duplicated	DR_003449-RA	481.3	311
BUSCOfEOG71K6FB	Duplicated	DR_000064-RA	337.7	303
BUSCOfEOG7RJQ0M	Duplicated	DR_000496-RA	2104.2	1988
BUSCOfEOG7X3R34	Duplicated	DR_004824-RA	369.1	313
BUSCOfEOG7QNVW5	Duplicated	DR_011785-RA	431.6	462
BUSCOfEOG7NKKTQ	Duplicated	DR_006686-RA	1287.6	800
BUSCOfEOG7HQNM2	Complete	DR_001731-RA	357.8	263
BUSCOfEOG7GXPKV	Duplicated	DR_006653-RA	1788.6	1354
BUSCOfEOG7RFTTM	Duplicated	DR_012145-RA	647.6	485
BUSCOfEOG7M98QZ	Duplicated	DR_005811-RA	1551.8	667
BUSCOfEOG7JQC0X	Duplicated	DR_002601-RA	269.6	150
BUSCOfEOG7BS4JW	Duplicated	DR_003128-RA	925.7	985
BUSCOfEOG7PZS5P	Complete	DR_002051-RA	1828.7	1280
BUSCOfEOG7H1JV1	Duplicated	DR_000336-RA	1283.5	874
BUSCOfEOG7RV9QF	Complete	DR_011883-RA	1321.5	863
BUSCOfEOG7K0ZQ3	Duplicated	DR_004691-RA	311.2	389
BUSCOfEOG7J188V	Duplicated	DR_010651-RA	206.9	194
BUSCOfEOG7RRFJ7	Duplicated	DR_004586-RA	616.2	388
BUSCOfEOG7QVMC1	Duplicated	DR_008386-RA	734.3	434
BUSCOfEOG7W6WZX	Complete	DR_001707-RA	325.4	274
BUSCOfEOG7380HP	Duplicated	DR_010449-RA	271.2	214
BUSCOfEOG751NSD	Duplicated	DR_001256-RA	743.6	498
BUSCOfEOG754J1G	Duplicated	DR_013389-RA	289.4	314
BUSCOfEOG7008JB	Duplicated	DR_010940-RA	1074.8	474
BUSCOfEOG783N4B	Complete	DR_013382-RA	776	438
BUSCOfEOG7F2524	Duplicated	DR_000726-RA	1243.6	1015
BUSCOfEOG7SN8R7	Duplicated	DR_006840-RA	348.5	145
BUSCOfEOG7NGQKW	Duplicated	DR_003450-RA	2002.8	1708
BUSCOfEOG79CZ6V	Complete	DR_007661-RA	1519.1	929
BUSCOfEOG76TB15	Duplicated	DR_013876-RA	982.2	699
BUSCOfEOG7DC2FJ	Duplicated	DR_013188-RA	382.3	246
BUSCOfEOG7K0ZQF	Duplicated	DR_012217-RA	409.8	187
BUSCOfEOG7K0ZQF	Duplicated	DR_013598-RA	415.6	187
BUSCOfEOG7W6WVP	Duplicated	DR_001538-RA	1005.2	613
BUSCOfEOG70W3R5	Complete	DR_010898-RA	476.6	283
BUSCOfEOG7W15CT	Duplicated	DR_007411-RA	959.9	833
BUSCOfEOG7J44H4	Duplicated	DR_002837-RA	946.6	597
BUSCOfEOG7KQ2B9	Duplicated	DR_008764-RA	948.2	392
BUSCOfEOG7DZ8V4	Duplicated	DR_008671-RA	944.2	484
BUSCOfEOG728949	Complete	DR_001681-RA	379.9	329
BUSCOfEOG7CRV0F	Duplicated	DR_013157-RA	733.8	436
BUSCOfEOG7XH705	Duplicated	DR_004853-RA	585.4	481
BUSCOfEOG77HDS9	Duplicated	DR_006511-RA	381.4	234
BUSCOfEOG7SBNZS	Duplicated	DR_003629-RA	150.6	288
BUSCOfEOG7966SK	Duplicated	DR_001656-RA	667.6	445
BUSCOfEOG7WDN9S	Duplicated	DR_004110-RA	2727.2	1805
BUSCOfEOG7XDBQH	Complete	DR_000862-RA	845.2	461
BUSCOfEOG7WMCW5	Complete	DR_006003-RA	688.1	445
BUSCOfEOG7T1RKK	Duplicated	DR_003360-RA	1068.7	1185
BUSCOfEOG7TXKRP	Duplicated	DR_002733-RA	974.1	493
BUSCOfEOG7PK97G	Duplicated	DR_012555-RA	1212.7	950
BUSCOfEOG73V6WQ	Duplicated	DR_005499-RA	390.1	285
BUSCOfEOG7Q8CXK	Duplicated	DR_013709-RA	481.6	397
BUSCOfEOG7BZW5H	Duplicated	DR_007952-RA	159.4	84
BUSCOfEOG7SXWFH	Duplicated	DR_006225-RA	558	440
BUSCOfEOG7GXPKT	Duplicated	DR_004970-RA	1613.1	1308
BUSCOfEOG7B31W6	Duplicated	DR_009329-RA	2049.4	1758
BUSCOfEOG773XTK	Complete	DR_000758-RA	354.5	195
BUSCOfEOG7N37N0	Duplicated	DR_011763-RA	1459.7	1117
BUSCOfEOG7X0VRZ	Complete	DR_007622-RA	686.6	533
BUSCOfEOG7SV173	Duplicated	DR_012880-RA	163.5	121
BUSCOfEOG7JDR61	Complete	DR_001002-RA	1131.5	807
BUSCOfEOG7P02TJ	Duplicated	DR_007816-RA	1291.7	828
BUSCOfEOG74FF9N	Duplicated	DR_013748-RA	563.7	428
BUSCOfEOG7T1RKQ	Duplicated	DR_004036-RA	1294.2	837
BUSCOfEOG7J187V	Duplicated	DR_008279-RA	1031.8	715
BUSCOfEOG7TN04K	Duplicated	DR_004543-RA	575	456
BUSCOfEOG7VHT8Z	Duplicated	DR_008959-RA	213.5	305
BUSCOfEOG7TBCBV	Duplicated	DR_000409-RA	654.4	406
BUSCOfEOG74J9H5	Duplicated	DR_007392-RA	4251.9	2235
BUSCOfEOG7P8PN5	Duplicated	DR_001581-RA	212.6	127
BUSCOfEOG7WHHNP	Duplicated	DR_008831-RA	249.6	156
BUSCOfEOG7FJH7Z	Duplicated	DR_008285-RA	1425	855
BUSCOfEOG7QNVW5	Duplicated	DR_008649-RA	438	460
BUSCOfEOG70PC7F	Duplicated	DR_011625-RA	375.6	283
BUSCOfEOG7W41QC	Duplicated	DR_001633-RA	354.9	210
BUSCOfEOG7K0ZNC	Duplicated	DR_009461-RA	976.7	508
BUSCOfEOG71K6BB	Duplicated	DR_003505-RA	1356.8	1013
BUSCOfEOG73RBMM	Duplicated	DR_012858-RA	980.6	529
BUSCOfEOG7W9S6F	Duplicated	DR_013140-RA	294.9	204
BUSCOfEOG7ZKSQH	Duplicated	DR_002023-RA	229.2	148
BUSCOfEOG7DC2FH	Duplicated	DR_008708-RA	794.4	392
BUSCOfEOG74BK18	Duplicated	DR_003725-RA	1823.8	1668
BUSCOfEOG780RVR	Duplicated	DR_008890-RA	1615.6	971
BUSCOfEOG7QVMCR	Duplicated	DR_005285-RA	417.7	314
BUSCOfEOG7SBNX9	Duplicated	DR_011556-RA	1027	666
BUSCOfEOG7TXKSN	Complete	DR_008435-RA	973.1	755
BUSCOfEOG7W6WVP	Duplicated	DR_002102-RA	1006.6	613
BUSCOfEOG7008JM	Duplicated	DR_007294-RA	610.1	412
BUSCOfEOG7PCJS1	Duplicated	DR_002192-RA	614.1	400
BUSCOfEOG73545F	Duplicated	DR_011440-RA	1192.6	633
BUSCOfEOG7647C5	Duplicated	DR_005324-RA	435.6	408
BUSCOfEOG7GXPMZ	Duplicated	DR_005885-RA	846	439
BUSCOfEOG72C5BH	Complete	DR_006618-RA	402.6	251
BUSCOfEOG74XSH4	Duplicated	DR_003376-RA	685.9	470
BUSCOfEOG7JMGRX	Duplicated	DR_010638-RA	409.4	273
BUSCOfEOG754J1G	Duplicated	DR_008656-RA	283.7	312
BUSCOfEOG7W15C7	Duplicated	DR_008715-RA	1620	972
BUSCOfEOG7XM38H	Complete	DR_009811-RA	922.9	578
BUSCOfEOG71GB4M	Duplicated	DR_002161-RA	508.3	323
BUSCOfEOG7DJSXQ	Duplicated	DR_008414-RA	649.1	301
BUSCOfEOG7X9GK1	Duplicated	DR_007541-RA	390	189
BUSCOfEOG7Z95XS	Duplicated	DR_000365-RA	220.7	253
BUSCOfEOG7380FJ	Duplicated	DR_010362-RA	993.3	971
BUSCOfEOG7QG4G3	Duplicated	DR_003437-RA	270.1	195
BUSCOfEOG7P8PJ3	Duplicated	DR_012917-RA	742.1	551
BUSCOfEOG780RWX	Duplicated	DR_006539-RA	858.3	464
BUSCOfEOG7GXPPN	Duplicated	DR_013138-RA	505.2	333
BUSCOfEOG7RFTVM	Duplicated	DR_011865-RA	475.7	243
BUSCOfEOG71VT28	Duplicated	DR_002273-RA	880.6	730
BUSCOfEOG7CNZQV	Duplicated	DR_011414-RA	956.6	516
BUSCOfEOG7F2542	Duplicated	DR_000288-RA	217.1	309
BUSCOfEOG7B5X6H	Duplicated	DR_010850-RA	659.7	600
BUSCOfEOG7380D3	Complete	DR_001018-RA	1330.7	1089
BUSCOfEOG7TJ3TD	Duplicated	DR_005368-RA	825.6	468
BUSCOfEOG72891J	Duplicated	DR_003797-RA	845.6	690
BUSCOfEOG76MKK1	Duplicated	DR_010525-RA	669.9	381
BUSCOfEOG741ZBG	Duplicated	DR_005250-RA	860.2	474
BUSCOfEOG74N5SR	Duplicated	DR_010592-RA	752.5	439
BUSCOfEOG77DJHR	Duplicated	DR_009486-RA	657.7	445
BUSCOfEOG7Z95VT	Duplicated	DR_008073-RA	716	417
BUSCOfEOG789CMF	Duplicated	DR_002674-RA	870.6	549
BUSCOfEOG7W41PG	Duplicated	DR_003605-RA	164	340
BUSCOfEOG7DJSVT	Duplicated	DR_004561-RA	1264.9	843
BUSCOfEOG72ZCPN	Duplicated	DR_003122-RA	1096.2	725
BUSCOfEOG7TN03Q	Duplicated	DR_008162-RA	353.5	331
BUSCOfEOG70PC7F	Duplicated	DR_005267-RA	377.3	283
BUSCOfEOG7P5T91	Complete	DR_002446-RA	558.7	403
BUSCOfEOG72890R	Duplicated	DR_008356-RA	1418.5	721
BUSCOfEOG75XGWD	Duplicated	DR_009824-RA	670	361
BUSCOfEOG7B320D	Duplicated	DR_002682-RA	254.6	205
BUSCOfEOG7QVMD6	Complete	DR_006100-RA	510.8	295
BUSCOfEOG7JX3GH	Complete	DR_002047-RA	392	344
BUSCOfEOG7673NV	Duplicated	DR_004267-RA	299.5	204
BUSCOfEOG7SN8NW	Duplicated	DR_001118-RA	714	533
BUSCOfEOG71CFVN	Duplicated	DR_007422-RA	1254.8	584
BUSCOfEOG7P02T6	Duplicated	DR_003120-RA	530.7	401
BUSCOfEOG7PVWXS	Complete	DR_001114-RA	1747.8	1040
BUSCOfEOG7Z0K7M	Complete	DR_008541-RA	507.5	255
BUSCOfEOG7KWSVP	Duplicated	DR_002775-RA	285.3	209
BUSCOfEOG77DJGM	Duplicated	DR_009615-RA	515.2	306
BUSCOfEOG7JMGNT	Duplicated	DR_002334-RA	1462.1	961
BUSCOfEOG77HDQD	Duplicated	DR_000652-RA	432.3	340
BUSCOfEOG71VT26	Duplicated	DR_009586-RA	2599.7	1473
BUSCOfEOG74N5SR	Duplicated	DR_010222-RA	753.8	439
BUSCOfEOG71CFWK	Duplicated	DR_007008-RA	142.8	389
BUSCOfEOG780RXX	Duplicated	DR_001956-RA	425.3	351
BUSCOfEOG7B8SC7	Duplicated	DR_002916-RA	1245.1	710
BUSCOfEOG7WQ83Z	Duplicated	DR_010364-RA	562.3	323
BUSCOfEOG7SBP03	Duplicated	DR_005943-RA	656.9	450
BUSCOfEOG7JDR6J	Duplicated	DR_001871-RA	542.6	634
BUSCOfEOG7N37RH	Duplicated	DR_004915-RA	278.1	171
BUSCOfEOG7MWH5T	Duplicated	DR_000542-RA	1085.7	572
BUSCOfEOG78M09C	Duplicated	DR_005915-RA	853.3	716
BUSCOfEOG7R2BV4	Duplicated	DR_009383-RA	332	379
BUSCOfEOG78D7XD	Duplicated	DR_011293-RA	201.8	144
BUSCOfEOG75MW7P	Duplicated	DR_005970-RA	282.7	248
BUSCOfEOG7NCVCS	Duplicated	DR_009024-RA	900.4	508
BUSCOfEOG7D5B0C	Duplicated	DR_009417-RA	478.5	309
BUSCOfEOG7N63W7	Complete	DR_001038-RA	1533.5	921
BUSCOfEOG7QNVXD	Duplicated	DR_004027-RA	459.3	324
BUSCOfEOG7FV40Z	Duplicated	DR_008832-RA	530.6	405
BUSCOfEOG71ZPC8	Duplicated	DR_006136-RA	558.9	313
BUSCOfEOG7DVDQ1	Duplicated	DR_006182-RA	346.5	252
BUSCOfEOG72ZCPJ	Duplicated	DR_008367-RA	1317.6	773
BUSCOfEOG74FF8R	Complete	DR_005476-RA	1039.8	650
BUSCOfEOG790G83	Complete	DR_001715-RA	1202.1	822
BUSCOfEOG7NSBBG	Duplicated	DR_011659-RA	692	520
BUSCOfEOG783N3Q	Duplicated	DR_004315-RA	552.9	341
BUSCOfEOG7XSTQ5	Duplicated	DR_001929-RA	679.7	374
BUSCOfEOG7Z3FFT	Duplicated	DR_013682-RA	478.3	292
BUSCOfEOG7SFJ5H	Duplicated	DR_003632-RA	541.4	352
BUSCOfEOG7CZKHC	Complete	DR_003334-RA	396.2	257
BUSCOfEOG79PJXZ	Duplicated	DR_004247-RA	1669.3	1201
BUSCOfEOG7Q5HPM	Duplicated	DR_013354-RA	711.3	681
BUSCOfEOG7SV15N	Duplicated	DR_006668-RA	855.3	583
BUSCOfEOG754HXV	Duplicated	DR_007406-RA	2163	1158
BUSCOfEOG7TN03Q	Duplicated	DR_006643-RA	353.8	330
BUSCOfEOG7B5X74	Duplicated	DR_000671-RA	536.6	331
BUSCOfEOG7MKWGD	Duplicated	DR_011323-RA	709.1	397
BUSCOfEOG7TN04C	Duplicated	DR_009885-RA	310.4	283
BUSCOfEOG7CVQ76	Duplicated	DR_012091-RA	491.7	284
BUSCOfEOG7Z3FG9	Duplicated	DR_001855-RA	502.7	282
BUSCOfEOG7B05RW	Complete	DR_010333-RA	222	150
BUSCOfEOG7T1RN4	Duplicated	DR_004330-RA	1252.3	772
BUSCOfEOG789CPC	Duplicated	DR_007162-RA	410.3	231
BUSCOfEOG7S7SR3	Duplicated	DR_002178-RA	565.2	286
BUSCOfEOG72C57N	Duplicated	DR_006859-RA	1547	1085
BUSCOfEOG7BP8F0	Duplicated	DR_004501-RA	310.6	261
BUSCOfEOG7PCJR9	Duplicated	DR_000159-RA	1729.4	1135
BUSCOfEOG7V76HM	Duplicated	DR_003244-RA	405.2	304
BUSCOfEOG78M09D	Duplicated	DR_004503-RA	1716	951
BUSCOfEOG7JQBXD	Complete	DR_005072-RA	938.6	759
BUSCOfEOG7PK9B1	Duplicated	DR_005017-RA	513.1	339
BUSCOfEOG7380FJ	Duplicated	DR_007594-RA	994.5	971
BUSCOfEOG70KH0H	Duplicated	DR_013029-RA	615.8	428
BUSCOfEOG74R22W	Duplicated	DR_012597-RA	276.2	151
BUSCOfEOG7W15C7	Duplicated	DR_009367-RA	1820.4	1061
BUSCOfEOG7FFN53	Duplicated	DR_013670-RA	163.2	82
BUSCOfEOG7DJSVM	Duplicated	DR_003175-RA	1358	865
BUSCOfEOG7DJSZ0	Duplicated	DR_006646-RA	341.4	222
BUSCOfEOG73RBQC	Duplicated	DR_004909-RA	282	151
BUSCOfEOG7H4F3P	Duplicated	DR_002550-RA	333.7	646
BUSCOfEOG74J9JF	Duplicated	DR_002661-RA	875.9	441
BUSCOfEOG7PCJT9	Duplicated	DR_010899-RA	610.6	445
BUSCOfEOG71GB6W	Duplicated	DR_011697-RA	316.1	239
BUSCOfEOG7QC85Z	Duplicated	DR_007432-RA	482.1	312
BUSCOfEOG7P2Z35	Duplicated	DR_005903-RA	505.4	323
BUSCOfEOG7GXPN0	Complete	DR_005563-RA	644.9	459
BUSCOfEOG7DNP6J	Duplicated	DR_010639-RA	698.8	515
BUSCOfEOG7X0VT2	Duplicated	DR_006219-RA	580.1	329
BUSCOfEOG7034SB	Duplicated	DR_008558-RA	921	667
BUSCOfEOG76X69V	Duplicated	DR_010419-RA	466.5	340
BUSCOfEOG74BK23	Duplicated	DR_002668-RA	1168.4	893
BUSCOfEOG790G80	Duplicated	DR_009172-RA	3922.5	2205
BUSCOfEOG7XSTQT	Duplicated	DR_007591-RA	898.4	544
BUSCOfEOG7XH6ZF	Duplicated	DR_002227-RA	1063.1	797
BUSCOfEOG7XM38T	Complete	DR_009730-RA	276	188
BUSCOfEOG7WDNCV	Duplicated	DR_002406-RA	837.3	531
BUSCOfEOG77WWNF	Duplicated	DR_009124-RA	1494.8	999
BUSCOfEOG7H79F8	Duplicated	DR_000048-RA	490.9	385
BUSCOfEOG7N37N0	Duplicated	DR_001793-RA	1540.5	1155
BUSCOfEOG722JJW	Duplicated	DR_012437-RA	456.8	428
BUSCOfEOG7RBZKK	Duplicated	DR_010084-RA	303.7	267
BUSCOfEOG7SBNXT	Duplicated	DR_008933-RA	834.9	840
BUSCOfEOG7CVQ7F	Duplicated	DR_010163-RA	564.3	423
BUSCOfEOG715QCZ	Duplicated	DR_007687-RA	942.1	660
BUSCOfEOG75B8JB	Duplicated	DR_002061-RA	431.9	287
BUSCOfEOG7MH16D	Complete	DR_000925-RA	6906.2	4170
BUSCOfEOG7XSTS0	Complete	DR_001720-RA	332.9	208
BUSCOfEOG7F2527	Duplicated	DR_010843-RA	1990.1	1572
BUSCOfEOG7TJ3T6	Duplicated	DR_007285-RA	906.2	437
BUSCOfEOG7TXKRS	Duplicated	DR_001773-RA	699.8	451
BUSCOfEOG7N9059	Complete	DR_008485-RA	942.3	550
BUSCOfEOG7G1VFV	Duplicated	DR_004484-RA	1211.7	586
BUSCOfEOG747PS9	Duplicated	DR_002928-RA	1765.8	1268
BUSCOfEOG7QG4CT	Duplicated	DR_010026-RA	1197.4	722
BUSCOfEOG70PC9D	Duplicated	DR_009365-RA	298.9	210
BUSCOfEOG7GQZ5S	Complete	DR_000992-RA	605.1	333
BUSCOfEOG7ZGXC2	Duplicated	DR_003080-RA	689.2	450
BUSCOfEOG7KQ28X	Duplicated	DR_010118-RA	2627	1570
BUSCOfEOG7K0ZQ9	Duplicated	DR_012334-RA	447.8	264
BUSCOfEOG7C5MHX	Complete	DR_001524-RA	990.8	647
BUSCOfEOG79931N	Duplicated	DR_008653-RA	404.1	274
BUSCOfEOG715QCR	Complete	DR_013575-RA	666.3	1238
BUSCOfEOG7647BG	Complete	DR_013673-RA	944.6	568
BUSCOfEOG7PK97G	Duplicated	DR_010926-RA	1217.5	952
BUSCOfEOG7WX0KP	Duplicated	DR_000158-RA	503.7	458
BUSCOfEOG7JQBXJ	Duplicated	DR_000712-RA	845.3	551
BUSCOfEOG7MD52F	Complete	DR_004240-RA	361.7	327
BUSCOfEOG7FJHC6	Duplicated	DR_006446-RA	358.2	245
BUSCOfEOG7SFJ59	Duplicated	DR_001170-RA	1517.7	1289
BUSCOfEOG7TJ3SF	Duplicated	DR_002463-RA	807.3	707
BUSCOfEOG7NCVBW	Duplicated	DR_008120-RA	1301.8	865
BUSCOfEOG7VX983	Duplicated	DR_002069-RA	221.2	145
BUSCOfEOG7SXWBR	Duplicated	DR_005796-RA	2061.7	1453
BUSCOfEOG7H79BK	Duplicated	DR_011854-RA	1083.6	509
BUSCOfEOG7PCJRV	Duplicated	DR_012375-RA	349.1	566
BUSCOfEOG72890P	Duplicated	DR_005984-RA	2206.3	1317
BUSCOfEOG7J9W0C	Duplicated	DR_002549-RA	833.1	715
BUSCOfEOG7XH6ZF	Duplicated	DR_001659-RA	1068.2	797
BUSCOfEOG7K3TW2	Duplicated	DR_001415-RA	578.4	407
BUSCOfEOG7Z95VF	Duplicated	DR_002878-RA	2412	1619
BUSCOfEOG7RJQ17	Duplicated	DR_005247-RA	629.8	502
BUSCOfEOG73FQW6	Duplicated	DR_007298-RA	1002.3	879
BUSCOfEOG7SR4ZT	Duplicated	DR_011103-RA	216.5	167
BUSCOfEOG7TTQJ2	Complete	DR_013745-RA	851.7	458
BUSCOfEOG7XWQ0B	Duplicated	DR_010782-RA	433.4	209
BUSCOfEOG7TQV8N	Duplicated	DR_003900-RA	1053	635
BUSCOfEOG75MW7X	Duplicated	DR_009793-RA	372.4	216
BUSCOfEOG744TMD	Duplicated	DR_002710-RA	471.3	393
BUSCOfEOG7G7KZ2	Duplicated	DR_005237-RA	573.2	539
BUSCOfEOG7CRV06	Duplicated	DR_000816-RA	586.8	491
BUSCOfEOG71ZPB0	Complete	DR_001004-RA	582.8	408
BUSCOfEOG7NW6K7	Duplicated	DR_007765-RA	549.3	419
BUSCOfEOG74R21N	Duplicated	DR_009348-RA	635.9	366
BUSCOfEOG7B05QC	Duplicated	DR_010669-RA	612.9	381
BUSCOfEOG73NGDW	Duplicated	DR_004172-RA	412.9	258
BUSCOfEOG741ZDG	Duplicated	DR_013526-RA	174.1	295
BUSCOfEOG70KH18	Duplicated	DR_005946-RA	203.7	246
BUSCOfEOG7TQV8N	Duplicated	DR_008657-RA	1058.4	635
BUSCOfEOG7J70QW	Complete	DR_003554-RA	405	344
BUSCOfEOG7HTHSD	Duplicated	DR_011886-RA	519.8	440
BUSCOfEOG79GTGW	Duplicated	DR_011429-RA	701.6	652
BUSCOfEOG769ZXC	Duplicated	DR_013770-RA	189.5	196
BUSCOfEOG712V4J	Duplicated	DR_010067-RA	4669	3085
BUSCOfEOG70W3P6	Duplicated	DR_006587-RA	1608.8	1134
BUSCOfEOG70PC83	Duplicated	DR_009251-RA	532	489
BUSCOfEOG77DJHZ	Duplicated	DR_004826-RA	738	481
BUSCOfEOG7GJ6P5	Duplicated	DR_006996-RA	726.4	459
BUSCOfEOG7DFXP0	Duplicated	DR_010663-RA	828.5	480
BUSCOfEOG783N4K	Duplicated	DR_002353-RA	1111	613
BUSCOfEOG7VB2RC	Duplicated	DR_010588-RA	397.2	352
BUSCOfEOG7CVQ6R	Duplicated	DR_003017-RA	698.9	438
BUSCOfEOG7TTQKW	Duplicated	DR_010506-RA	630.5	434
BUSCOfEOG7XPZGS	Duplicated	DR_004202-RA	603.2	328
BUSCOfEOG7XSTR7	Duplicated	DR_011486-RA	576	450
BUSCOfEOG7JT779	Duplicated	DR_011062-RA	362.4	268
BUSCOfEOG7B8SF4	Duplicated	DR_006328-RA	354.8	196
BUSCOfEOG741ZBG	Duplicated	DR_012628-RA	854.7	474
BUSCOfEOG7TXKT9	Duplicated	DR_010185-RA	805.3	543
BUSCOfEOG7M0P18	Duplicated	DR_010318-RA	1048.4	1040
BUSCOfEOG7D864S	Duplicated	DR_005027-RA	2157.4	1360
BUSCOfEOG7SFJ5H	Duplicated	DR_011194-RA	538.5	354
BUSCOfEOG783N6S	Duplicated	DR_003069-RA	399	278
BUSCOfEOG7PCJS1	Duplicated	DR_001625-RA	614.1	400
BUSCOfEOG7MWH5T	Duplicated	DR_005152-RA	1085.4	572
BUSCOfEOG7MWH5Z	Duplicated	DR_005511-RA	989.5	559
BUSCOfEOG7Z95VF	Duplicated	DR_005898-RA	2428.1	1645
BUSCOfEOG7GN2W1	Duplicated	DR_011434-RA	1881.8	965
BUSCOfEOG71P2KR	Duplicated	DR_011647-RA	1024	613
BUSCOfEOG7Z0K4N	Duplicated	DR_011431-RA	2252.7	1435
BUSCOfEOG7NCVD1	Duplicated	DR_003026-RA	1010.9	590
BUSCOfEOG7WT49D	Duplicated	DR_005697-RA	1075.5	782
BUSCOfEOG7DZ8XZ	Duplicated	DR_003176-RA	261.7	238
BUSCOfEOG7WT4D3	Duplicated	DR_012715-RA	192.8	137
BUSCOfEOG7WDNCD	Duplicated	DR_004223-RA	463.3	260
BUSCOfEOG7G7M0Q	Duplicated	DR_002727-RA	787.3	692
BUSCOfEOG7VHT6B	Duplicated	DR_010841-RA	951.7	470
BUSCOfEOG72RN9W	Duplicated	DR_012675-RA	350.1	224
BUSCOfEOG76MKMM	Duplicated	DR_007403-RA	421	271
BUSCOfEOG7FR7S6	Duplicated	DR_007831-RA	834.9	659
BUSCOfEOG79SF5D	Duplicated	DR_001319-RA	1595.4	1271
BUSCOfEOG7B3213	Fragmented	DR_010903-RA	203	100
BUSCOfEOG7CK3GC	Duplicated	DR_008115-RA	1147.3	746
BUSCOfEOG70KH0F	Complete	DR_011594-RA	604.6	375
BUSCOfEOG7QG4GH	Complete	DR_001800-RA	193.1	137
BUSCOfEOG70S7JS	Duplicated	DR_013286-RA	207.8	106
BUSCOfEOG7HTHR9	Duplicated	DR_009751-RA	1052.3	968
BUSCOfEOG73JM5T	Duplicated	DR_006181-RA	427.3	297
BUSCOfEOG7ZPNX0	Duplicated	DR_002245-RA	314.7	236
BUSCOfEOG7KSXHR	Duplicated	DR_011833-RA	3537.3	2363
BUSCOfEOG7F2546	Complete	DR_012396-RA	929.5	845
BUSCOfEOG7X3R1P	Duplicated	DR_006647-RA	641.4	435
BUSCOfEOG786HCM	Duplicated	DR_001973-RA	669.7	402
BUSCOfEOG71P2KR	Duplicated	DR_013266-RA	1022.8	617
BUSCOfEOG7XDBSF	Duplicated	DR_008186-RA	639.1	436
BUSCOfEOG7WDNC2	Duplicated	DR_013632-RA	566.9	387
BUSCOfEOG76X69V	Duplicated	DR_002396-RA	494.7	339
BUSCOfEOG7NGQPJ	Complete	DR_004887-RA	197.7	135
BUSCOfEOG7PVX0C	Complete	DR_003353-RA	612.7	386
BUSCOfEOG77Q571	Duplicated	DR_002844-RA	372.9	238
BUSCOfEOG754J1M	Duplicated	DR_013743-RA	364.3	224
BUSCOfEOG77DJF6	Duplicated	DR_011330-RA	1591.3	967
BUSCOfEOG7KH9VN	Duplicated	DR_007825-RA	439.3	483
BUSCOfEOG79PJZ1	Duplicated	DR_005956-RA	573.6	437
BUSCOfEOG7TJ3TZ	Duplicated	DR_011247-RA	491.8	388
BUSCOfEOG73BVPW	Complete	DR_005470-RA	663.1	352
BUSCOfEOG7SV14M	Duplicated	DR_002546-RA	1190.3	655
BUSCOfEOG7FV3ZX	Duplicated	DR_001413-RA	1595.1	828
BUSCOfEOG7RNK7W	Duplicated	DR_007080-RA	837.6	579
BUSCOfEOG708W9G	Duplicated	DR_003418-RA	503.4	499
BUSCOfEOG7MKWG1	Complete	DR_004058-RA	749.5	592
BUSCOfEOG7TQV9T	Duplicated	DR_002011-RA	539.8	376
BUSCOfEOG71CFZD	Duplicated	DR_003221-RA	478.9	277
BUSCOfEOG7K9KD0	Duplicated	DR_001459-RA	919.6	747
BUSCOfEOG77Q57P	Complete	DR_008462-RA	317.1	253
BUSCOfEOG7RJQ17	Duplicated	DR_011603-RA	636.1	505
BUSCOfEOG7NKKTQ	Duplicated	DR_008208-RA	1313.7	793
BUSCOfEOG7PK99N	Duplicated	DR_010881-RA	583.6	424
BUSCOfEOG76MKJK	Duplicated	DR_010789-RA	576.8	403
BUSCOfEOG7H4F2V	Complete	DR_002508-RA	1818.6	1199
BUSCOfEOG7KQ2CK	Duplicated	DR_003442-RA	285.6	255
BUSCOfEOG71P2KZ	Duplicated	DR_000728-RA	829.8	542
BUSCOfEOG73281W	Duplicated	DR_005255-RA	256.4	148
BUSCOfEOG779P7X	Duplicated	DR_005278-RA	294.7	254
BUSCOfEOG7FR7S9	Fragmented	DR_004327-RA	336.2	226
BUSCOfEOG78WM14	Duplicated	DR_005258-RA	1512.2	959
BUSCOfEOG7GBG71	Duplicated	DR_006407-RA	728.2	506
BUSCOfEOG747PSQ	Duplicated	DR_000483-RA	906.8	632
BUSCOfEOG74TX6Z	Duplicated	DR_001441-RA	1970.8	1165
BUSCOfEOG7ZKSP0	Complete	DR_004250-RA	518.5	370
BUSCOfEOG7ZWDC7	Duplicated	DR_001826-RA	548.4	357
BUSCOfEOG7DZ8XZ	Duplicated	DR_012620-RA	260	238
BUSCOfEOG7M98RW	Complete	DR_000933-RA	645.9	475
BUSCOfEOG7WHHK2	Duplicated	DR_005623-RA	1489.4	842
BUSCOfEOG722JJC	Duplicated	DR_007237-RA	931.2	556
BUSCOfEOG74J9MP	Duplicated	DR_003112-RA	152.3	101
BUSCOfEOG7712J5	Duplicated	DR_010254-RA	596.7	357
BUSCOfEOG7Z95XB	Duplicated	DR_012126-RA	289.3	213
BUSCOfEOG70ZZWZ	Duplicated	DR_012931-RA	913.1	550
BUSCOfEOG7ZPNWZ	Duplicated	DR_013200-RA	429.3	403
BUSCOfEOG7FBRWF	Duplicated	DR_000143-RA	282.9	227
BUSCOfEOG76DV5T	Complete	DR_002820-RA	137.9	95
BUSCOfEOG7SN8MT	Duplicated	DR_002875-RA	622.7	1015
BUSCOfEOG7ZD27F	Duplicated	DR_004517-RA	279.6	186
BUSCOfEOG7Q2NFT	Duplicated	DR_006878-RA	1511.1	994
BUSCOfEOG7VX96Z	Duplicated	DR_001277-RA	416.4	282
BUSCOfEOG7F253S	Duplicated	DR_012586-RA	461.5	325
BUSCOfEOG7XDBQN	Duplicated	DR_001360-RA	661.1	484
BUSCOfEOG78WM1V	Duplicated	DR_010296-RA	942.9	605
BUSCOfEOG7GN2W1	Duplicated	DR_011236-RA	1882.9	959
BUSCOfEOG72C57X	Duplicated	DR_001970-RA	612.6	407
BUSCOfEOG7CK3G4	Duplicated	DR_013496-RA	3362.2	2331
BUSCOfEOG751NV3	Duplicated	DR_002395-RA	148.7	80
BUSCOfEOG75J0WR	Duplicated	DR_008423-RA	350.4	352
BUSCOfEOG70ZZWP	Duplicated	DR_007751-RA	1557.8	1045
BUSCOfEOG7TJ3TD	Duplicated	DR_011849-RA	352.9	336
BUSCOfEOG7H79FB	Duplicated	DR_003793-RA	223.3	130
BUSCOfEOG7WT4D5	Duplicated	DR_000263-RA	176.2	129
BUSCOfEOG7TTQH2	Duplicated	DR_007139-RA	1934.2	1103
BUSCOfEOG77DJGT	Duplicated	DR_002624-RA	658.5	399
BUSCOfEOG7SFJ5S	Duplicated	DR_002005-RA	547.3	428
BUSCOfEOG7SBP20	Duplicated	DR_002730-RA	143.9	106
BUSCOfEOG72ZCQ7	Duplicated	DR_004381-RA	657.5	406
BUSCOfEOG70PC6X	Duplicated	DR_012177-RA	669	445
BUSCOfEOG7CRV06	Duplicated	DR_006931-RA	591	492
BUSCOfEOG7N0CHQ	Duplicated	DR_002426-RA	444.8	369
BUSCOfEOG7CG77Z	Complete	DR_004041-RA	1129.1	619
BUSCOfEOG7034TX	Complete	DR_010871-RA	306.6	200
BUSCOfEOG7JMGNT	Duplicated	DR_001440-RA	1497	980
BUSCOfEOG7RNK8W	Duplicated	DR_005702-RA	1035.7	433
BUSCOfEOG7ZPNX4	Complete	DR_009968-RA	182.6	182
BUSCOfEOG70ZZWZ	Duplicated	DR_001130-RA	907	547
BUSCOfEOG7NSB9S	Duplicated	DR_008071-RA	1577.1	1629
BUSCOfEOG7Q2NHQ	Duplicated	DR_009406-RA	283.4	229
BUSCOfEOG7NSBB4	Fragmented	DR_005718-RA	450.8	430
BUSCOfEOG747PX1	Duplicated	DR_011437-RA	254.5	139
BUSCOfEOG76QFVQ	Duplicated	DR_005827-RA	391.2	273
BUSCOfEOG7MSMZ2	Duplicated	DR_008967-RA	1193.5	791
BUSCOfEOG7JQBX8	Duplicated	DR_002034-RA	376	592
BUSCOfEOG7GBG71	Duplicated	DR_000264-RA	730.2	506
BUSCOfEOG73NGCS	Duplicated	DR_005973-RA	538.3	455
BUSCOfEOG7V1G00	Duplicated	DR_012240-RA	1197.4	765
BUSCOfEOG7SFJ58	Complete	DR_012399-RA	1693	1022
BUSCOfEOG78H45S	Complete	DR_002120-RA	536.2	271
BUSCOfEOG75F4P2	Duplicated	DR_000302-RA	573.9	510
BUSCOfEOG7Z0K75	Duplicated	DR_010197-RA	557.7	345
BUSCOfEOG79W9FW	Duplicated	DR_011599-RA	597	343
BUSCOfEOG73JM40	Duplicated	DR_007282-RA	809.2	687
BUSCOfEOG7W9S51	Duplicated	DR_000573-RA	407.4	237
BUSCOfEOG7PCJR4	Duplicated	DR_005823-RA	5763.2	3677
BUSCOfEOG7M6DHG	Duplicated	DR_000080-RA	803.5	556
BUSCOfEOG7K6Q74	Complete	DR_000910-RA	214.2	112
BUSCOfEOG7JX3DQ	Complete	DR_001236-RA	769.9	596
BUSCOfEOG7SFJ6V	Complete	DR_008504-RA	253.2	404
BUSCOfEOG7P2Z21	Duplicated	DR_012767-RA	820.4	482
BUSCOfEOG7QNVZZ	Complete	DR_000297-RA	431.9	301
BUSCOfEOG73BVPZ	Duplicated	DR_007559-RA	334.9	267
BUSCOfEOG7F51BJ	Complete	DR_005077-RA	672.8	453
BUSCOfEOG7XH72F	Duplicated	DR_008878-RA	198.7	158
BUSCOfEOG7WX0KW	Duplicated	DR_004107-RA	834.8	528
BUSCOfEOG7B05P8	Duplicated	DR_013306-RA	665.1	452
BUSCOfEOG7TJ3TZ	Duplicated	DR_012562-RA	479.9	364
BUSCOfEOG70W3S0	Duplicated	DR_012762-RA	367.7	323
BUSCOfEOG7DFXRB	Duplicated	DR_007685-RA	316.9	238
BUSCOfEOG7F2527	Duplicated	DR_004934-RA	1991.7	1571
BUSCOfEOG7JHMDW	Duplicated	DR_009292-RA	1141.4	855
BUSCOfEOG78D7TX	Duplicated	DR_003684-RA	690.2	494
BUSCOfEOG7WDNC5	Duplicated	DR_005821-RA	1326.2	672
BUSCOfEOG73V6VZ	Duplicated	DR_009078-RA	699.4	459
BUSCOfEOG7Z69MN	Duplicated	DR_001636-RA	2698.7	1996
BUSCOfEOG7M0P4G	Duplicated	DR_009477-RA	265.6	200
BUSCOfEOG7B5X51	Duplicated	DR_010075-RA	809.1	429
BUSCOfEOG76MKNV	Complete	DR_013897-RA	245	113
BUSCOfEOG7JHMJ1	Complete	DR_005456-RA	262.3	171
BUSCOfEOG7CRTZV	Duplicated	DR_005522-RA	1402.9	754
BUSCOfEOG70GMQJ	Duplicated	DR_013449-RA	669.1	504
BUSCOfEOG7G4QRH	Duplicated	DR_005705-RA	464.1	324
BUSCOfEOG7MSMZ2	Duplicated	DR_007479-RA	1186	791
BUSCOfEOG7WX0MV	Complete	DR_009802-RA	208.5	163
BUSCOfEOG7NW6JC	Duplicated	DR_010011-RA	1611.6	1353
BUSCOfEOG7FBRS5	Duplicated	DR_002923-RA	887.3	679
BUSCOfEOG76X699	Complete	DR_002058-RA	444.8	403
BUSCOfEOG7TJ3T6	Duplicated	DR_005223-RA	905.7	437
BUSCOfEOG78SQVF	Duplicated	DR_010452-RA	380	257
BUSCOfEOG7TN01H	Complete	DR_001740-RA	1274.5	744
BUSCOfEOG783N3Z	Duplicated	DR_003953-RA	820.7	548
BUSCOfEOG7CVQ7K	Complete	DR_002642-RA	470.2	334
BUSCOfEOG72VHGT	Duplicated	DR_010149-RA	730.9	333
BUSCOfEOG7KSXJ9	Duplicated	DR_012144-RA	2036.2	1097
BUSCOfEOG7WT49D	Duplicated	DR_005763-RA	424.3	817
BUSCOfEOG71K6BB	Duplicated	DR_005551-RA	1364.8	1014
BUSCOfEOG7N63XC	Complete	DR_001717-RA	862	511
BUSCOfEOG7B8SC7	Duplicated	DR_003054-RA	1250.6	712
BUSCOfEOG73BVR6	Duplicated	DR_013480-RA	177.5	116
BUSCOfEOG783N5G	Complete	DR_005064-RA	674.8	314
BUSCOfEOG7WT4C2	Duplicated	DR_012851-RA	368.6	239
BUSCOfEOG7QNVX7	Duplicated	DR_001090-RA	549.5	394
BUSCOfEOG7MD52N	Duplicated	DR_010689-RA	435.7	214
BUSCOfEOG7JMGNQ	Duplicated	DR_004957-RA	6120.9	4932
BUSCOfEOG7WHHNH	Duplicated	DR_002078-RA	408.5	207
BUSCOfEOG78D7XD	Duplicated	DR_008315-RA	201.7	144
BUSCOfEOG7PCJR9	Duplicated	DR_010688-RA	1730.7	1134
BUSCOfEOG7NSBC8	Duplicated	DR_002286-RA	673.3	371
BUSCOfEOG77Q569	Duplicated	DR_005395-RA	478.7	355
BUSCOfEOG7W41M1	Duplicated	DR_008592-RA	2533.7	1960
BUSCOfEOG7N905X	Duplicated	DR_011299-RA	395.8	310
BUSCOfEOG74R20H	Duplicated	DR_000668-RA	953.5	559
BUSCOfEOG7VQJP2	Duplicated	DR_006776-RA	767.2	505
BUSCOfEOG7PK977	Duplicated	DR_011784-RA	547.2	588
BUSCOfEOG7M0P18	Duplicated	DR_011359-RA	1056.6	1040
BUSCOfEOG77DJF6	Duplicated	DR_008429-RA	1316.5	901
BUSCOfEOG7MD51P	Duplicated	DR_008699-RA	393.9	206
BUSCOfEOG7DFXRB	Duplicated	DR_007505-RA	318.8	238
BUSCOfEOG761C34	Duplicated	DR_005677-RA	1261.9	836
BUSCOfEOG7MD4ZK	Complete	DR_005837-RA	1097.5	679
BUSCOfEOG77WWN8	Complete	DR_002005-RA	1648.6	940
BUSCOfEOG7ZGXCT	Duplicated	DR_010145-RA	480.7	386
BUSCOfEOG7JDR96	Duplicated	DR_010469-RA	440.1	248
BUSCOfEOG7DFXQ2	Duplicated	DR_004311-RA	732.1	351
BUSCOfEOG72C57N	Duplicated	DR_009699-RA	1548.5	1084
BUSCOfEOG747PT4	Duplicated	DR_002130-RA	753.8	486
BUSCOfEOG7TTQH2	Duplicated	DR_005417-RA	1928	1104
BUSCOfEOG793BHK	Duplicated	DR_004859-RA	1133.6	549
BUSCOfEOG7NPG3K	Duplicated	DR_013177-RA	486.1	334
BUSCOfEOG72G1JR	Duplicated	DR_005997-RA	724.8	559
BUSCOfEOG7VX96V	Duplicated	DR_011014-RA	572.9	363
BUSCOfEOG7NPG2Q	Duplicated	DR_003308-RA	996.4	774
BUSCOfEOG77Q569	Duplicated	DR_007116-RA	470.1	356
BUSCOfEOG7G1VHK	Duplicated	DR_009216-RA	588	353
BUSCOfEOG7JT755	Complete	DR_011078-RA	849.6	569
BUSCOfEOG7FR7TW	Fragmented	DR_013072-RA	79.8	79
BUSCOfEOG7XDBRV	Duplicated	DR_012196-RA	634.7	336
BUSCOfEOG74J9HW	Complete	DR_005069-RA	379.8	318
BUSCOfEOG7M0P3P	Duplicated	DR_012305-RA	319.1	169
BUSCOfEOG7PS1QF	Duplicated	DR_003432-RA	846.7	524
BUSCOfEOG7C2RBS	Duplicated	DR_004014-RA	755.3	457
BUSCOfEOG7P5TBG	Duplicated	DR_012938-RA	884.9	899
BUSCOfEOG75MW6X	Duplicated	DR_006013-RA	114.4	274
BUSCOfEOG7QZGMD	Duplicated	DR_002496-RA	632.5	356
BUSCOfEOG7MWH92	Duplicated	DR_000097-RA	247.5	160
BUSCOfEOG7W15CW	Duplicated	DR_004470-RA	967.4	502
BUSCOfEOG7H4F5X	Duplicated	DR_000567-RA	237.5	179
BUSCOfEOG77WWRD	Duplicated	DR_001607-RA	250.8	168
BUSCOfEOG7P02SB	Duplicated	DR_006495-RA	1282	1026
BUSCOfEOG7HB5JW	Duplicated	DR_001079-RA	573.5	667
BUSCOfEOG7X6MB3	Complete	DR_000072-RA	601.1	404
BUSCOfEOG725DVD	Duplicated	DR_005793-RA	808	513
BUSCOfEOG71P2KM	Duplicated	DR_003958-RA	1313	655
BUSCOfEOG7XDBSV	Duplicated	DR_004459-RA	451.4	235
BUSCOfEOG77T1H5	Duplicated	DR_008970-RA	287.8	224
BUSCOfEOG7V1G2H	Duplicated	DR_011452-RA	245.2	191
BUSCOfEOG7BGHW7	Duplicated	DR_007913-RA	924.7	515
BUSCOfEOG7Z0K8S	Duplicated	DR_011624-RA	280.5	140
BUSCOfEOG7KSXJQ	Duplicated	DR_007492-RA	844.1	446
BUSCOfEOG7K6Q51	Duplicated	DR_002876-RA	528.4	306
BUSCOfEOG7GTTCX	Duplicated	DR_013864-RA	871.7	484
BUSCOfEOG73JM46	Duplicated	DR_007577-RA	1119.7	581
BUSCOfEOG74N5V2	Complete	DR_000594-RA	325.3	183
BUSCOfEOG7NPG3J	Duplicated	DR_006309-RA	788.4	503
BUSCOfEOG7VHT6S	Duplicated	DR_011653-RA	780.7	403
BUSCOfEOG706142	Duplicated	DR_013409-RA	202.5	113
BUSCOfEOG74J9H5	Duplicated	DR_001994-RA	3839	2086
BUSCOfEOG7C8GT4	Duplicated	DR_010975-RA	345.5	213
BUSCOfEOG773XSZ	Duplicated	DR_005836-RA	356.8	304
[truncated: 573 more rows]

## Sheet: mRNA_allBLAST
Query	Target	Ident	length	miss	Gaps	Start	Stop	e-Value	Bit_score
DR_003123-RA	DR_009958-RA	94.8	711	37	0	1	711	0	1116
DR_003124-RA	DR_009957-RA	95.34	1245	55	1	1	1245	0	2004
DR_003122-RA	DR_009959-RA	95.05	2304	114	0	1	2304	0	3663
DR_003128-RA	DR_009953-RA	93.2	3105	211	0	1	3105	0	4482
DR_003120-RA	DR_009961-RA	96.71	1214	40	0	1	1214	0	2089
DR_003131-RA	DR_009950-RA	95.07	831	32	1	1	822	0	1330
DR_003144-RA	DR_009939-RA	94.88	723	37	0	1	723	0	1140
DR_003176-RA	DR_012620-RA	95.82	765	32	0	1	765	0	1263
DR_003183-RA	DR_012627-RA	95.25	526	25	0	822	1347	0	844
DR_003183-RA	DR_012627-RA	93.43	563	34	1	248	807	0	819
DR_003183-RA	DR_012627-RA	95	120	6	0	1	120	2e-48	190
DR_003183-RA	DR_012627-RA	93.4	106	7	0	162	267	1e-37	155
DR_003174-RA	DR_012413-RA	94.16	1422	81	1	10	1431	0	2155
DR_003175-RA	DR_012619-RA	92.98	1994	138	2	827	2820	0	2827
DR_003175-RA	DR_012619-RA	92.92	833	59	0	1	833	0	1183
DR_003170-RA	DR_012409-RA	95.58	656	29	0	14	669	0	1070
DR_003168-RA	DR_009916-RA	95.02	1968	95	1	1	1968	0	3120
DR_003190-RA	DR_013430-RA	93	2085	137	1	1	2076	0	2983
DR_003197-RA	DR_012327-RA	93.36	1401	93	0	124	1524	0	2040
DR_003197-RA	DR_012327-RA	95.04	121	6	0	1	121	6e-49	192
DR_005796-RA	DR_011996-RA	96.53	3714	129	0	1	3714	0	6340
DR_005796-RA	DR_011996-RA	98.09	157	3	0	3923	4079	5e-77	287
DR_005793-RA	DR_011994-RA	95.23	1278	61	0	1	1278	0	2050
DR_005793-RA	DR_011994-RA	94.38	178	10	0	1484	1661	3e-73	274
DR_005822-RA	DR_007843-RA	95.27	2051	97	0	10	2060	0	3297
DR_005810-RA	DR_007831-RA	94.28	961	55	0	80	1040	0	1469
DR_005810-RA	DR_007831-RA	94.71	888	38	1	1139	2026	0	1396
DR_005810-RA	DR_007831-RA	100	70	0	0	2154	2223	1e-32	139
DR_005810-RA	DR_007831-RA	92.86	98	7	0	1039	1136	1e-32	139
DR_005821-RA	DR_007842-RA	96.9	2000	62	0	287	2286	0	3473
DR_005827-RA	DR_007848-RA	96.31	814	30	0	1	814	0	1376
DR_005823-RA	DR_007844-RA	95.32	10666	499	0	171	10836	0	17190
DR_005823-RA	DR_007844-RA	95.17	683	33	0	10883	11565	0	1092
DR_005823-RA	DR_007844-RA	95.1	143	7	0	1	143	8e-59	228
DR_005833-RA	DR_007854-RA	93.62	815	49	1	1	815	0	1199
DR_005836-RA	DR_007857-RA	93.39	1029	68	0	1	1029	0	1501
DR_005826-RA	DR_007847-RA	95.48	1860	84	0	1	1860	0	3021
DR_013743-RA	DR_010537-RA	95.89	681	28	0	1	681	0	1128
DR_013744-RA	DR_010538-RA	94.62	1023	55	0	1	1023	0	1592
DR_013742-RA	DR_010536-RA	98.03	406	8	0	1	406	0	741
DR_012873-RA	DR_000496-RA	94.52	7190	394	0	1	7190	0	11130
DR_012873-RA	DR_000496-RA	94.23	52	3	0	7213	7264	3e-14	79.8
DR_012866-RA	DR_000503-RA	94.73	1842	94	1	1	1839	0	2878
DR_000003-RA	DR_004637-RA	95.07	1135	56	0	5	1139	0	1806
DR_000003-RA	DR_004637-RA	92.22	334	26	0	1264	1597	3e-128	456
DR_000010-RA	DR_004644-RA	93.12	858	59	0	26	883	0	1233
DR_000023-RA	DR_004654-RA	95.91	2200	90	0	1	2200	0	3648
DR_000033-RA	DR_004664-RA	93.27	1233	72	6	1	1231	0	1748
DR_000048-RA	DR_004678-RA	93.53	1392	88	2	1	1390	0	2030
DR_000048-RA	DR_004678-RA	95.28	106	5	0	1392	1497	2e-42	170
DR_000061-RA	DR_004691-RA	95.83	1487	62	0	1	1487	0	2456
DR_000066-RA	DR_004697-RA	94.61	2280	120	1	1	2277	0	3540
DR_000064-RA	DR_004695-RA	94.53	987	54	0	1	987	0	1528
DR_000068-RA	DR_004699-RA	94.93	1677	85	0	1	1677	0	2650
DR_000060-RA	DR_004690-RA	95.42	3252	149	0	244	3495	0	5265
DR_000060-RA	DR_004690-RA	95.49	244	11	0	1	244	5e-110	396
DR_000039-RA	DR_004670-RA	95.89	681	28	0	21	701	0	1128
DR_000039-RA	DR_004670-RA	94.14	665	39	0	871	1535	0	1009
DR_000080-RA	DR_004712-RA	96.23	1751	66	0	1	1751	0	2948
DR_000086-RA	DR_009657-RA	95.03	1588	79	0	3145	4732	0	2522
DR_000086-RA	DR_009657-RA	94.62	1171	57	2	1	1165	0	1814
DR_000086-RA	DR_009657-RA	97.42	852	22	0	1626	2477	0	1515
DR_000086-RA	DR_009657-RA	95.09	529	26	0	2530	3058	0	842
DR_000086-RA	DR_009657-RA	95.83	288	12	0	1166	1453	2e-133	476
DR_000076-RA	DR_004707-RA	92.08	2752	196	9	457	3190	0	3681
DR_000076-RA	DR_004707-RA	95.18	456	22	0	1	456	0	729
DR_000098-RA	DR_009669-RA	94.44	1026	56	1	15	1039	0	1574
DR_000131-RA	DR_008107-RA	93.2	2705	184	0	8	2712	0	3903
DR_000128-RA	DR_008110-RA	94.68	1484	73	1	1	1484	0	2317
DR_000128-RA	DR_008110-RA	95.14	1420	69	0	1779	3198	0	2268
DR_000128-RA	DR_008110-RA	94.98	239	12	0	1517	1755	1e-104	379
DR_000118-RA	DR_009690-RA	95.52	2432	109	0	1	2432	0	3957
DR_000118-RA	DR_009690-RA	94.75	1333	70	0	2491	3823	0	2087
DR_000141-RA	DR_008097-RA	95.64	2066	81	1	1	2066	0	3390
DR_000141-RA	DR_008097-RA	95.92	735	30	0	2188	2922	0	1219
DR_000143-RA	DR_008095-RA	93.05	734	51	0	1	734	0	1051
DR_000165-RA	DR_008072-RA	93.94	1385	84	0	5	1389	0	2079
DR_000158-RA	DR_008079-RA	92.36	1650	120	2	13	1659	0	2264
DR_000166-RA	DR_008071-RA	94.18	4947	285	1	1	4947	0	7519
DR_000190-RA	DR_012047-RA	94.63	1526	81	1	1	1525	0	2367
DR_000191-RA	DR_012046-RA	95.11	1392	68	0	1483	2874	0	2220
DR_000191-RA	DR_012046-RA	95.56	360	16	0	1030	1389	2e-167	587
DR_000189-RA	DR_012048-RA	93.3	1135	70	1	1	1129	0	1649
DR_000189-RA	DR_012048-RA	93.8	371	23	0	1149	1519	1e-157	553
DR_000203-RA	DR_001890-RA	93.82	1748	108	0	1	1748	0	2609
DR_000203-RA	DR_001890-RA	94.07	135	8	0	1743	1877	2e-52	204
DR_000222-RA	DR_001870-RA	94.37	1758	99	0	1	1758	0	2700
DR_000197-RA	DR_012038-RA	94.85	2896	149	0	5	2900	0	4559
DR_000197-RA	DR_012038-RA	97.11	311	9	0	3031	3341	9e-155	545
DR_000197-RA	DR_012038-RA	91.67	192	16	0	3409	3600	5e-67	254
DR_000199-RA	DR_012036-RA	94.21	915	53	0	1777	2691	0	1394
DR_000221-RA	DR_001871-RA	90.4	2073	193	2	10	2076	0	2524
DR_007036-RA	DR_002238-RA	95.67	1363	59	0	251	1613	0	2234
DR_007036-RA	DR_002238-RA	94.47	253	14	0	1	253	1e-108	391
DR_007076-RA	DR_010772-RA	90.3	711	66	1	5	715	0	858
DR_007080-RA	DR_010557-RA	93.05	1309	88	1	5	1313	0	1869
DR_007080-RA	DR_010557-RA	89.09	669	67	2	1453	2121	0	739
DR_007091-RA	DR_010547-RA	95.87	1672	69	0	642	2313	0	2767
DR_007091-RA	DR_010547-RA	90.52	464	41	1	1	464	1e-161	567
DR_002102-RA	DR_001538-RA	95.02	2070	103	0	1	2070	0	3287
DR_002101-RA	DR_001537-RA	93.65	787	42	2	63	841	0	1160
DR_002126-RA	DR_001564-RA	94.25	2052	118	0	1	2052	0	3132
DR_002137-RA	DR_001574-RA	94.48	2988	165	0	1	2988	0	4615
DR_002111-RA	DR_001547-RA	94.02	1221	73	0	1	1221	0	1842
DR_002132-RA	DR_001570-RA	94.31	1247	69	2	26	1271	0	1893
DR_002108-RA	DR_001544-RA	95.18	1203	58	0	13	1215	0	1925
DR_002125-RA	DR_001563-RA	96.04	2069	79	1	13	2081	0	3447
DR_002131-RA	DR_001569-RA	94.29	2713	155	0	19	2731	0	4149
DR_002130-RA	DR_001568-RA	92.93	1472	104	0	1	1472	0	2093
DR_002141-RA	DR_001578-RA	94.09	1033	61	0	1	1033	0	1564
DR_002141-RA	DR_002142-RA	100	60	0	0	997	1056	5e-27	119
DR_002145-RA	DR_001581-RA	92.81	556	40	0	1	556	0	785
DR_002161-RA	DR_001596-RA	90.93	1036	94	0	52	1087	0	1308
DR_002142-RA	DR_001579-RA	87.73	807	92	2	22	828	0	809
DR_002142-RA	DR_002141-RA	100	60	0	0	769	828	4e-27	119
DR_002173-RA	DR_001606-RA	95.08	5082	250	0	1	5082	0	8092
DR_002192-RA	DR_001625-RA	95.34	2724	127	0	1	2724	0	4393
DR_002186-RA	DR_001620-RA	94.23	1022	59	0	51	1072	0	1558
DR_002186-RA	DR_001620-RA	95.65	46	2	0	5	50	7e-14	75.8
DR_002178-RA	DR_001611-RA	97.37	532	14	0	350	881	0	944
DR_002178-RA	DR_001611-RA	98.52	338	5	0	1	338	0	630
DR_002204-RA	DR_001636-RA	95.75	6539	278	0	1	6539	0	10760
DR_002227-RA	DR_001659-RA	94.64	2445	131	0	1	2445	0	3808
DR_002238-RA	DR_007036-RA	95.67	1363	59	0	395	1757	0	2234
DR_002238-RA	DR_007036-RA	94.47	253	14	0	1	253	2e-108	391
DR_002226-RA	DR_001658-RA	94.81	462	24	0	208	669	0	726
DR_002226-RA	DR_001658-RA	100	65	0	0	1	65	3e-30	129
DR_002213-RA	DR_001645-RA	95.14	1419	69	0	1198	2616	0	2266
DR_002213-RA	DR_001645-RA	95.62	1164	51	0	1	1164	0	1903
DR_002224-RA	DR_001656-RA	94.38	1316	71	1	1	1316	0	2018
DR_002200-RA	DR_001633-RA	95.51	557	25	0	1	557	0	906
DR_002200-RA	DR_001633-RA	96.84	95	3	0	614	708	6e-41	165
DR_013870-RA	DR_001678-RA	91.93	1413	114	0	1	1413	0	1897
DR_013870-RA	DR_001678-RA	92.61	961	71	0	1462	2422	0	1342
DR_001547-RA	DR_002111-RA	94.02	1221	73	0	1	1221	0	1842
DR_001538-RA	DR_002102-RA	95.02	2070	103	0	2	2071	0	3287
DR_001544-RA	DR_002108-RA	95.18	1203	58	0	13	1215	0	1925
DR_001537-RA	DR_002101-RA	93.65	787	42	2	70	856	0	1160
DR_001564-RA	DR_002126-RA	94.25	2052	118	0	1	2052	0	3132
DR_001574-RA	DR_002137-RA	94.48	2988	165	0	1	2988	0	4615
DR_001578-RA	DR_002141-RA	94.09	1033	61	0	1	1033	0	1564
DR_001578-RA	DR_001579-RA	100	60	0	0	997	1056	5e-27	119
DR_001570-RA	DR_002132-RA	94.31	1247	69	2	24	1269	0	1893
DR_001581-RA	DR_002145-RA	92.81	556	40	0	6	561	0	785
DR_001563-RA	DR_002125-RA	96.04	2069	79	1	12	2077	0	3447
DR_001579-RA	DR_002142-RA	87.73	807	92	2	22	821	0	809
DR_001579-RA	DR_001578-RA	100	60	0	0	762	821	4e-27	119
DR_001569-RA	DR_002131-RA	94.29	2713	155	0	19	2731	0	4149
DR_001568-RA	DR_002130-RA	92.93	1472	104	0	1	1472	0	2093
DR_001596-RA	DR_002161-RA	90.93	1036	94	0	1	1036	0	1308
DR_001636-RA	DR_002204-RA	95.75	6539	278	0	1	6539	0	10760
DR_001659-RA	DR_002227-RA	94.64	2445	131	0	1	2445	0	3808
DR_001658-RA	DR_002226-RA	94.81	462	24	0	91	552	0	726
DR_001658-RA	DR_002226-RA	100	65	0	0	1	65	3e-30	129
DR_001606-RA	DR_002173-RA	95.08	5082	250	0	1	5082	0	8092
DR_001625-RA	DR_002192-RA	95.34	2724	127	0	1	2724	0	4393
DR_001645-RA	DR_002213-RA	95.14	1419	69	0	1168	2586	0	2266
DR_001645-RA	DR_002213-RA	95.62	1164	51	0	1	1164	0	1903
DR_001633-RA	DR_002200-RA	95.51	557	25	0	1	557	0	906
DR_001633-RA	DR_002200-RA	96.84	95	3	0	560	654	6e-41	165
DR_001656-RA	DR_002224-RA	94.38	1316	71	1	1	1313	0	2018
DR_001611-RA	DR_002178-RA	97.37	532	14	0	338	869	0	944
DR_001611-RA	DR_002178-RA	98.52	338	5	0	1	338	0	630
DR_001620-RA	DR_002186-RA	94.23	1022	59	0	149	1170	0	1558
DR_001620-RA	DR_002186-RA	95.65	46	2	0	67	112	7e-14	75.8
DR_010391-RA	DR_002423-RA	92.46	783	59	0	5	787	0	1084
DR_010420-RA	DR_002395-RA	96.97	297	9	0	1	297	2e-147	517
DR_010393-RA	DR_002421-RA	95.3	3022	139	1	1166	4184	0	4861
DR_010393-RA	DR_002421-RA	91.74	1065	88	0	1	1065	0	1413
DR_010393-RA	DR_002421-RA	95.93	614	25	0	4370	4983	0	1019
DR_010399-RA	DR_002416-RA	89.89	544	51	3	25	567	3e-178	620
DR_010409-RA	DR_002406-RA	95.87	1695	67	1	1	1692	0	2801
DR_010411-RA	DR_002404-RA	94.49	4305	237	0	28	4332	0	6655
DR_010419-RA	DR_002396-RA	93.82	857	53	0	207	1063	0	1279
DR_010419-RA	DR_002396-RA	92.23	206	16	0	1	206	6e-76	281
DR_010881-RA	DR_007891-RA	93.77	1317	82	0	1	1317	0	1961
DR_010874-RA	DR_007884-RA	97.08	2227	65	0	1	2227	0	3899
DR_010874-RA	DR_007884-RA	96.63	624	21	0	2413	3036	0	1070
DR_010874-RA	DR_007884-RA	96.63	89	3	0	2373	2461	1e-36	153
DR_010875-RA	DR_007885-RA	92.93	1840	114	5	1	1832	0	2599
DR_010885-RA	DR_008671-RA	95.28	1081	48	1	216	1293	0	1735
DR_010885-RA	DR_008671-RA	92.11	279	18	2	1896	2171	3e-101	367
DR_010885-RA	DR_008671-RA	94.12	238	14	0	1296	1533	2e-99	361
DR_010885-RA	DR_008671-RA	95.14	144	6	1	1	143	1e-57	222
DR_003326-RA	DR_009179-RA	95.37	1858	86	0	12	1869	0	3001
DR_003343-RA	DR_006094-RA	93.82	1457	90	0	1	1457	0	2175
DR_003342-RA	DR_006095-RA	93.39	2405	148	7	1	2402	0	3459
DR_003345-RA	DR_006092-RA	95.88	1019	42	0	1	1019	0	1687
DR_003351-RA	DR_006085-RA	95.39	3360	154	1	1	3359	0	5424
DR_003364-RA	DR_006072-RA	95.64	1538	67	0	3	1540	0	2518
DR_003348-RA	DR_006088-RA	96.55	3160	109	0	279	3438	0	5400
DR_003348-RA	DR_006088-RA	95.57	203	9	0	8	210	2e-90	331
DR_003360-RA	DR_006076-RA	93.9	3948	238	1	1	3945	0	5911
DR_003350-RA	DR_006086-RA	95.98	1866	75	0	1	1866	0	3104
DR_003371-RA	DR_006065-RA	94.75	838	44	0	1	838	0	1312
DR_003376-RA	DR_006060-RA	95.42	1244	57	0	1	1244	0	2014
DR_003390-RA	DR_006046-RA	95.01	921	46	0	1	921	0	1461
DR_003397-RA	DR_006037-RA	94.47	199	11	0	2	200	3e-84	307
DR_003397-RA	DR_006037-RA	93.6	172	11	0	201	372	4e-68	254
DR_003375-RA	DR_006061-RA	95.7	5116	220	0	1	5116	0	8397
DR_003409-RA	DR_006027-RA	95.29	1911	90	0	1	1911	0	3075
DR_003438-RA	DR_013140-RA	92	962	68	4	138	1091	0	1275
DR_003437-RA	DR_013141-RA	95.71	3448	148	0	1	3448	0	5662
DR_003437-RA	DR_013141-RA	96.19	603	23	0	3586	4188	0	1013
DR_003437-RA	DR_013141-RA	96.55	58	2	0	3497	3554	2e-20	99.6
DR_003442-RA	DR_013137-RA	90.18	1079	93	8	1	1073	0	1245
DR_003432-RA	DR_006004-RA	93.74	847	53	0	436	1282	0	1259
DR_003432-RA	DR_006004-RA	89.26	121	13	0	1	121	3e-32	137
DR_003406-RA	DR_006030-RA	95.51	2448	110	0	1	2448	0	3981
DR_003440-RA	DR_013138-RA	94.83	1181	58	1	1	1181	0	1853
DR_003418-RA	DR_006018-RA	92	1788	134	2	1	1785	0	2409
DR_002249-RA	DR_012475-RA	92.82	738	43	1	12	749	0	1053
DR_002248-RA	DR_012476-RA	94.9	1707	87	0	1	1707	0	2694
DR_002245-RA	DR_012479-RA	92.09	670	53	0	1	670	0	908
DR_002245-RA	DR_012479-RA	92.75	69	5	0	725	793	2e-20	97.6
DR_002273-RA	DR_001377-RA	94.84	2190	107	2	16	2205	0	3437
DR_002273-RA	DR_001377-RA	87.68	284	29	2	2350	2633	2e-74	278
DR_002286-RA	DR_001390-RA	95.92	1325	48	2	8	1331	0	2190
DR_002282-RA	DR_001386-RA	92.68	724	53	0	1	724	0	1015
DR_002308-RA	DR_001413-RA	95.61	2526	111	0	1	2526	0	4127
DR_002316-RA	DR_001422-RA	92.85	4688	329	2	5	4689	0	6629
DR_002299-RA	DR_001403-RA	92.75	3213	215	3	1	3204	0	4528
DR_002315-RA	DR_001421-RA	95.27	656	30	1	12	666	0	1047
DR_002310-RA	DR_001415-RA	96.39	720	26	0	535	1254	0	1221
DR_002310-RA	DR_001415-RA	96.45	535	19	0	1	535	0	910
DR_002338-RA	DR_001444-RA	94.48	489	27	0	1	489	0	755
DR_002334-RA	DR_001440-RA	94.47	2331	129	0	1	2331	0	3598
DR_002334-RA	DR_001440-RA	93.66	505	32	0	2340	2844	0	747
DR_002329-RA	DR_001435-RA	91.09	1987	159	7	1	1980	0	2502
DR_002328-RA	DR_001434-RA	94.43	2046	114	0	1	2046	0	3152
DR_007116-RA	DR_005395-RA	94.74	1216	64	0	1	1216	0	1903
DR_007111-RA	DR_005390-RA	92.45	477	36	0	1	477	0	660
DR_007119-RA	DR_005398-RA	90.76	963	84	3	1	963	0	1183
DR_007142-RA	DR_005420-RA	92.42	633	45	1	1	633	0	870
DR_007147-RA	DR_013055-RA	94.2	4773	274	1	1579	6348	0	7261
DR_007147-RA	DR_013055-RA	94.61	835	42	1	1	835	0	1294
DR_007147-RA	DR_013055-RA	92.2	436	34	0	1106	1541	2e-169	595
DR_007139-RA	DR_005417-RA	94.49	3449	189	1	9	3457	0	5323
DR_012857-RA	DR_004082-RA	91.87	1734	132	2	1	1734	0	2317
DR_012856-RA	DR_004081-RA	93.98	830	50	0	1	830	0	1249
DR_012858-RA	DR_004083-RA	94.85	1689	78	1	1	1680	0	2666
DR_008430-RA	DR_011331-RA	94.37	391	22	0	493	883	4e-172	601
DR_008430-RA	DR_011331-RA	95.93	172	7	0	185	356	3e-77	285
DR_008430-RA	DR_011331-RA	95.9	122	5	0	364	485	4e-52	202
DR_008430-RA	DR_011331-RA	98.11	106	2	0	74	179	9e-50	194
DR_008430-RA	DR_011331-RA	94.81	77	4	0	1	77	1e-27	121
DR_008437-RA	DR_005689-RA	95.2	1563	75	0	1	1563	0	2504
DR_008449-RA	DR_005702-RA	94.32	1585	90	0	22	1606	0	2428
DR_008429-RA	DR_011330-RA	94.75	1903	100	0	696	2598	0	2979
DR_008429-RA	DR_011330-RA	91.85	270	22	0	1	270	2e-99	361
DR_008429-RA	DR_011330-RA	94.9	157	8	0	273	429	2e-65	248
DR_008429-RA	DR_011330-RA	97.67	129	3	0	438	566	1e-60	232
DR_008429-RA	DR_011330-RA	94.49	127	5	1	571	695	4e-48	190
DR_008476-RA	DR_005727-RA	93.95	1588	84	4	208	1789	0	2371
DR_008483-RA	DR_005734-RA	93.11	842	55	3	1	840	0	1185
DR_008452-RA	DR_005705-RA	94.4	1358	76	0	1	1358	0	2089
DR_008457-RA	DR_005710-RA	95.67	323	14	0	191	513	1e-150	529
DR_008457-RA	DR_005710-RA	96.67	240	8	0	531	770	2e-115	412
DR_008454-RA	DR_005707-RA	93.43	1857	122	0	362	2218	0	2714
DR_008454-RA	DR_005707-RA	88.82	170	19	0	194	363	5e-47	186
DR_008454-RA	DR_005707-RA	91.74	121	10	0	11	131	3e-39	161
DR_008454-RA	DR_005707-RA	95.65	46	2	0	153	198	1e-13	75.8
DR_012511-RA	DR_005001-RA	96.59	1524	52	0	799	2322	0	2609
DR_012511-RA	DR_005001-RA	96.51	631	22	0	1	631	0	1076
DR_012516-RA	DR_005006-RA	96.03	705	28	0	601	1305	0	1176
DR_012516-RA	DR_005006-RA	96.79	592	17	2	5	596	0	1007
DR_012516-RA	DR_005006-RA	96.49	114	4	0	1314	1427	1e-49	194
DR_012515-RA	DR_005005-RA	93.41	743	49	0	23	765	0	1084
DR_012515-RA	DR_005005-RA	84.44	257	29	5	783	1033	1e-40	165
DR_012509-RA	DR_004999-RA	93.3	552	36	1	1	551	0	793
DR_012756-RA	DR_012280-RA	93.15	1008	66	1	1	1008	0	1447
DR_012757-RA	DR_012281-RA	92.91	945	67	0	4	948	0	1342
DR_012762-RA	DR_012286-RA	90.89	933	82	1	1	930	0	1172
DR_012759-RA	DR_012283-RA	95.39	607	28	0	1	607	0	981
DR_012759-RA	DR_012283-RA	88.08	562	55	3	613	1164	8e-165	577
DR_011625-RA	DR_005267-RA	92.63	882	65	0	1	882	0	1233
DR_011637-RA	DR_005279-RA	93.53	2025	131	0	1	2025	0	2976
DR_011612-RA	DR_005255-RA	93.3	552	34	1	1	549	0	797
DR_011615-RA	DR_005258-RA	95.59	1246	54	1	533	1777	0	2026
DR_011615-RA	DR_005258-RA	94.64	616	33	0	2087	2702	0	959
DR_011615-RA	DR_005258-RA	94.76	401	21	0	46	446	6e-180	628
DR_011615-RA	DR_005258-RA	97.09	309	9	0	1777	2085	1e-153	541
DR_011603-RA	DR_005247-RA	94.64	1680	90	0	18	1697	0	2617
DR_011599-RA	DR_005243-RA	93.73	2344	145	2	1	2342	0	3465
DR_011598-RA	DR_005242-RA	95.01	921	45	1	1	920	0	1453
DR_011598-RA	DR_005242-RA	87.07	116	15	0	962	1077	1e-24	111
DR_011636-RA	DR_005278-RA	93.15	1051	72	0	1	1051	0	1513
DR_011624-RA	DR_005266-RA	96.44	450	16	0	1	450	0	765
DR_013314-RA	DR_011538-RA	94.78	882	46	0	1	882	0	1384
DR_013318-RA	DR_011542-RA	92.3	636	48	1	1	636	0	864
DR_013315-RA	DR_011539-RA	95.47	397	18	0	1	397	0	644
DR_013624-RA	DR_004630-RA	94.68	1222	65	0	124	1345	0	1907
DR_011866-RA	DR_004231-RA	95.54	987	44	0	1	987	0	1608
DR_009193-RA	DR_013956-RA	94.68	489	26	0	247	735	0	763
DR_009179-RA	DR_003326-RA	95.37	1858	86	0	12	1869	0	3001
DR_009567-RA	DR_006737-RA	94.14	3723	212	1	1	3723	0	5654
DR_009585-RA	DR_006720-RA	92.95	1361	96	0	539	1899	0	1937
DR_009585-RA	DR_006720-RA	94.38	534	30	0	5	538	0	821
DR_009615-RA	DR_011436-RA	95.62	936	41	0	82	1017	0	1530
DR_009609-RA	DR_011442-RA	92.95	936	63	1	1	936	0	1328
DR_009574-RA	DR_006730-RA	96.37	551	20	0	1	551	0	934
DR_009611-RA	DR_011440-RA	94.58	2104	110	1	14	2117	0	3265
DR_009586-RA	DR_006719-RA	94.3	5049	279	2	1	5040	0	7723
DR_009614-RA	DR_011437-RA	93.94	940	56	1	8	947	0	1403
DR_009599-RA	DR_011452-RA	94.66	974	35	4	615	1583	0	1513
DR_009599-RA	DR_011452-RA	95.79	570	24	0	1	570	0	940
DR_009591-RA	DR_011460-RA	94.27	1239	70	1	14	1251	0	1885
DR_012851-RA	DR_013806-RA	94.14	768	45	0	46	813	0	1166
DR_010362-RA	DR_007594-RA	92.75	3570	256	1	1	3567	0	5019
DR_010364-RA	DR_007592-RA	93.51	740	45	1	400	1136	0	1082
DR_010364-RA	DR_007592-RA	95.02	402	20	0	1	402	0	638
DR_010380-RA	DR_010975-RA	94.65	729	39	0	1	729	0	1136
DR_012631-RA	DR_002438-RA	94.93	1400	71	0	1	1400	0	2212
DR_012631-RA	DR_002438-RA	95.39	304	14	0	1692	1995	6e-139	492
DR_012637-RA	DR_002443-RA	96.97	330	10	0	115	444	2e-164	575
DR_012637-RA	DR_002443-RA	96.43	308	11	0	331	638	6e-149	523
DR_012637-RA	DR_002443-RA	96.52	115	4	0	1	115	2e-50	196
DR_009879-RA	DR_003919-RA	95.43	1971	90	0	1	1971	0	3194
DR_009887-RA	DR_003911-RA	91.51	683	58	0	1	683	0	894
DR_009887-RA	DR_003911-RA	88.38	327	38	0	702	1028	1e-95	347
DR_009883-RA	DR_003915-RA	93.19	1248	85	0	1	1248	0	1800
DR_009891-RA	DR_003907-RA	94.53	3948	216	0	1	3948	0	6114
DR_009871-RA	DR_003926-RA	93.61	876	56	0	406	1281	0	1292
DR_009871-RA	DR_003926-RA	96.94	392	12	0	1	392	0	682
DR_009914-RA	DR_012271-RA	94.33	2364	125	2	1	2361	0	3622
DR_009895-RA	DR_003903-RA	94.16	531	30	1	1	531	0	799
DR_009878-RA	DR_003920-RA	94.99	719	34	1	111	827	0	1134
DR_009878-RA	DR_003920-RA	92.19	64	5	0	17	80	1e-17	87.7
DR_013536-RA	DR_000291-RA	96.05	2910	115	0	274	3183	0	4857
DR_013536-RA	DR_000291-RA	92.19	269	21	0	1	269	4e-101	367
DR_013535-RA	DR_000290-RA	95.84	2309	96	0	1	2309	0	3816
DR_011655-RA	DR_013242-RA	94.65	1588	85	0	4	1591	0	2474
DR_011644-RA	DR_013268-RA	95.84	457	19	0	801	1257	0	755
DR_011659-RA	DR_013238-RA	93.64	1635	104	0	1	1635	0	2416
DR_011647-RA	DR_013266-RA	93.92	2122	120	2	1	2122	0	3182
DR_011656-RA	DR_013241-RA	92.84	2681	181	4	16	2694	0	3774
DR_011656-RA	DR_013242-RA	90.32	93	7	1	2604	2694	5e-23	107
DR_011653-RA	DR_013244-RA	95.82	1196	50	0	1	1196	0	1974
DR_001826-RA	DR_004287-RA	93.02	1161	81	0	1	1161	0	1659
DR_001812-RA	DR_004300-RA	95.99	1470	59	0	1339	2808	0	2446
DR_001812-RA	DR_004300-RA	96	1149	46	0	1	1149	0	1913
DR_001822-RA	DR_004291-RA	94.03	2127	124	1	908	3034	0	3205
DR_001822-RA	DR_004291-RA	92.33	600	46	0	265	864	0	825
DR_001823-RA	DR_004290-RA	94.43	897	50	0	1369	2265	0	1382
DR_001823-RA	DR_004290-RA	92.78	665	48	0	588	1252	0	938
DR_001823-RA	DR_004290-RA	95.74	423	18	0	1	423	0	696
DR_001819-RA	DR_004293-RA	93.48	660	43	0	3	662	0	967
DR_001846-RA	DR_012209-RA	95.38	1646	76	0	13	1658	0	2660
DR_001855-RA	DR_011778-RA	94.21	881	51	0	1	881	0	1342
DR_001863-RA	DR_011770-RA	94.12	1292	76	0	1	1292	0	1959
DR_001871-RA	DR_000221-RA	90.4	2073	193	2	16	2088	0	2524
DR_001870-RA	DR_000222-RA	94.37	1758	99	0	1	1758	0	2700
DR_001902-RA	DR_000706-RA	95.14	4159	201	1	1	4159	0	6635
DR_001890-RA	DR_000203-RA	93.82	1748	108	0	1	1748	0	2609
DR_001890-RA	DR_000203-RA	94.07	135	8	0	1758	1892	2e-52	204
DR_001921-RA	DR_000723-RA	89.74	1023	95	2	1	1020	0	1195
DR_001926-RA	DR_000728-RA	94.64	1697	85	2	1	1697	0	2635
DR_001919-RA	DR_000721-RA	93.13	1325	91	0	1	1325	0	1905
DR_001948-RA	DR_004036-RA	88.28	1561	168	4	1	1555	0	1633
DR_001948-RA	DR_004036-RA	92.05	1056	84	0	1747	2802	0	1427
DR_001929-RA	DR_000731-RA	96.66	1139	38	0	35	1173	0	1957
DR_001909-RA	DR_000712-RA	95.65	1818	79	0	1	1818	0	2977
DR_001924-RA	DR_000726-RA	94.76	3471	176	2	1	3471	0	5430
DR_009264-RA	DR_013466-RA	95.89	1047	43	0	1	1047	0	1735
DR_009264-RA	DR_013466-RA	100	34	0	0	1043	1076	3e-11	67.9
DR_009262-RA	DR_004202-RA	94.59	1053	54	2	5	1056	0	1622
DR_009262-RA	DR_004202-RA	96.66	898	30	0	1057	1954	0	1542
DR_009262-RA	DR_004202-RA	95.24	210	10	0	1976	2185	2e-92	337
DR_011681-RA	DR_012597-RA	95.44	548	25	0	1	548	0	888
DR_011676-RA	DR_012592-RA	94.69	1356	72	0	49	1404	0	2117
DR_011690-RA	DR_012606-RA	95.77	780	33	0	1	780	0	1285
DR_011670-RA	DR_012586-RA	93.2	1162	71	2	36	1195	0	1673
DR_011670-RA	DR_012587-RA	93.7	127	8	0	1069	1195	7e-48	188
DR_011688-RA	DR_012604-RA	96.4	1195	43	0	127	1321	0	2028
DR_011688-RA	DR_012604-RA	90.63	128	12	0	1	128	7e-39	159
DR_011669-RA	DR_012585-RA	93.66	3171	189	4	1	3165	0	4676
DR_011682-RA	DR_012598-RA	96.08	4010	157	0	1	4010	0	6704
DR_011689-RA	DR_012605-RA	95.67	646	28	0	1	646	0	1059
DR_011684-RA	DR_012600-RA	96.43	1371	49	0	429	1799	0	2329
DR_011684-RA	DR_012600-RA	96.86	733	23	0	1800	2532	0	1271
DR_011684-RA	DR_012600-RA	95.74	352	15	0	79	430	4e-165	579
DR_004735-RA	DR_011709-RA	96.12	1675	65	0	1254	2928	0	2805
DR_004735-RA	DR_011709-RA	95.61	1254	55	0	1	1254	0	2050
DR_004723-RA	DR_011697-RA	93.46	1009	66	0	1	1009	0	1477
DR_004754-RA	DR_003099-RA	94.08	710	42	0	71	780	0	1074
DR_004754-RA	DR_003099-RA	93.94	66	4	0	7	72	3e-21	99.6
DR_004785-RA	DR_006147-RA	95.04	1572	78	0	79	1650	0	2498
DR_004770-RA	DR_005027-RA	95.7	4185	180	0	486	4670	0	6869
DR_004788-RA	DR_006150-RA	93.54	789	51	0	480	1268	0	1160
DR_004788-RA	DR_006150-RA	92.58	418	30	1	49	466	3e-164	575
DR_004765-RA	DR_003112-RA	93.91	345	21	0	45	389	2e-147	517
DR_012938-RA	DR_001122-RA	93.51	2541	162	1	2	2539	0	3725
DR_012927-RA	DR_001135-RA	92.11	1445	96	7	1	1441	0	1927
DR_012941-RA	DR_001118-RA	92.35	1281	95	1	1030	2307	0	1758
DR_012941-RA	DR_001118-RA	89.95	955	88	4	17	967	0	1108
DR_012932-RA	DR_001128-RA	93.83	1264	76	2	111	1374	0	1871
DR_012931-RA	DR_001130-RA	95.25	1622	77	0	1	1622	0	2605
DR_012476-RA	DR_002248-RA	94.9	1707	87	0	1	1707	0	2694
DR_012479-RA	DR_002245-RA	92.09	670	53	0	646	1315	0	908
DR_012479-RA	DR_002245-RA	92.75	69	5	0	1361	1429	3e-20	97.6
DR_012475-RA	DR_002249-RA	92.82	738	43	1	12	739	0	1053
DR_008890-RA	DR_013531-RA	95.61	3076	135	0	1	3076	0	5027
DR_008907-RA	DR_012305-RA	90.98	743	63	2	1	740	0	930
DR_008911-RA	DR_012308-RA	91.59	511	40	1	42	549	0	668
DR_008933-RA	DR_012242-RA	93.71	3038	191	0	8	3045	0	4508
DR_008931-RA	DR_012240-RA	94	2567	153	1	1	2566	0	3860
DR_008927-RA	DR_012236-RA	94.14	1194	70	0	16	1209	0	1812
DR_008929-RA	DR_012238-RA	94.79	384	20	0	247	630	7e-173	603
DR_008929-RA	DR_012238-RA	89.26	242	26	0	1	242	8e-74	274
DR_009005-RA	DR_005983-RA	94.09	406	24	0	414	819	2e-176	615
DR_009005-RA	DR_005983-RA	92.19	384	30	0	1	384	7e-149	523
DR_009016-RA	DR_005973-RA	93.19	1365	93	0	7	1371	0	1968
DR_009004-RA	DR_005984-RA	95.44	3704	169	0	1	3704	0	6003
DR_009004-RA	DR_005984-RA	96.47	255	9	0	3715	3969	2e-121	434
DR_009030-RA	DR_005956-RA	92.62	1666	120	1	1	1663	0	2323
DR_009043-RA	DR_005943-RA	95.28	1463	69	0	1	1463	0	2353
DR_009042-RA	DR_005944-RA	94.58	719	39	0	1	719	0	1116
DR_009040-RA	DR_005946-RA	93.93	478	29	0	261	738	0	718
DR_009040-RA	DR_005946-RA	95.4	261	12	0	1	261	2e-118	422
DR_009025-RA	DR_005960-RA	93.45	1756	115	0	1	1756	0	2569
DR_009024-RA	DR_005962-RA	94.83	1547	62	2	1	1547	0	2448
DR_001068-RA	DR_007823-RA	94.23	5352	309	0	1	5352	0	8159
DR_001066-RA	DR_007825-RA	94.5	1747	96	0	1	1747	0	2702
DR_001057-RA	DR_011158-RA	94.29	2927	161	1	29	2949	0	4480
DR_001084-RA	DR_007805-RA	96.04	2097	83	0	1	2097	0	3499
DR_001087-RA	DR_007802-RA	95	2600	130	0	5	2604	0	4123
DR_001093-RA	DR_007796-RA	94.16	1078	60	1	49	1126	0	1633
DR_001090-RA	DR_007799-RA	96.57	700	24	0	88	787	0	1197
DR_001090-RA	DR_007799-RA	91.39	488	42	0	829	1316	0	634
DR_001089-RA	DR_007800-RA	95.89	2263	93	0	561	2823	0	3749
DR_001089-RA	DR_007800-RA	95.66	530	23	0	20	549	0	868
DR_001095-RA	DR_007794-RA	91.47	1677	143	0	1	1677	0	2190
DR_001076-RA	DR_007814-RA	93.71	842	51	2	1	841	0	1233
DR_001079-RA	DR_007811-RA	94.22	2646	153	0	1	2646	0	4032
DR_001118-RA	DR_012941-RA	92.35	1281	95	1	965	2245	0	1758
DR_001118-RA	DR_012941-RA	89.95	955	88	4	15	965	0	1108
DR_001117-RA	DR_007772-RA	94.95	555	28	0	31	585	0	878
DR_001103-RA	DR_007786-RA	92.23	3050	231	2	1	3044	0	4159
DR_001102-RA	DR_007787-RA	93.97	1394	84	0	98	1491	0	2097
DR_001128-RA	DR_012932-RA	93.83	1264	76	2	82	1343	0	1871
DR_001140-RA	DR_003796-RA	95.9	1072	44	0	1	1072	0	1776
DR_001143-RA	DR_003793-RA	90.54	687	55	3	1	683	0	837
DR_001143-RA	DR_003793-RA	88	75	9	0	777	851	1e-14	77.8
DR_001130-RA	DR_012931-RA	95.25	1622	77	0	20	1641	0	2605
DR_001151-RA	DR_003785-RA	93.74	1886	118	0	1	1886	0	2803
DR_001151-RA	DR_003785-RA	93.91	427	26	0	1955	2381	0	640
DR_001151-RA	DR_003785-RA	100	46	0	0	1881	1926	3e-18	91.7
DR_001141-RA	DR_003795-RA	93.04	761	53	0	1088	1848	0	1088
DR_001141-RA	DR_003795-RA	93.55	682	44	0	1	682	0	1003
DR_001141-RA	DR_003795-RA	93.72	414	26	0	669	1082	6e-176	615
DR_001135-RA	DR_012927-RA	92.11	1445	96	7	153	1583	0	1927
DR_001139-RA	DR_003797-RA	95.46	1189	54	0	138	1326	0	1929
DR_001139-RA	DR_003797-RA	95.06	486	24	0	1324	1809	0	773
DR_001139-RA	DR_003797-RA	93.75	96	6	0	1812	1907	6e-34	143
DR_001139-RA	DR_003797-RA	98.67	75	1	0	1	75	2e-33	141
DR_001122-RA	DR_012938-RA	93.51	2541	162	1	1	2541	0	3725
DR_001165-RA	DR_003771-RA	94.59	647	35	0	255	901	0	1005
DR_001165-RA	DR_003771-RA	93.94	660	40	0	931	1590	0	991
DR_001165-RA	DR_003771-RA	94.92	453	23	0	1	453	0	716
DR_001165-RA	DR_003771-RA	94.68	94	5	0	480	573	3e-35	147
DR_001170-RA	DR_003767-RA	95.48	4269	193	0	1	4269	0	6932
DR_001155-RA	DR_003781-RA	96.51	1689	56	1	409	2097	0	2876
DR_001155-RA	DR_003781-RA	93.14	379	18	3	38	414	7e-151	531
DR_001196-RA	DR_003740-RA	96.32	897	33	0	1	897	0	1516
DR_001191-RA	DR_003745-RA	92.61	1353	99	1	1	1352	0	1881
DR_001211-RA	DR_003725-RA	94.44	4967	276	0	1	4967	0	7658
DR_001178-RA	DR_003758-RA	94.25	1287	71	1	1	1287	0	1961
DR_005870-RA	DR_011096-RA	95.53	1030	46	0	552	1581	0	1677
DR_005870-RA	DR_011096-RA	96.55	551	19	0	1	551	0	942
DR_005852-RA	DR_010697-RA	93.96	993	60	0	1	993	0	1493
DR_005864-RA	DR_011102-RA	97.15	912	26	0	1	912	0	1602
DR_005869-RA	DR_011097-RA	93.88	1013	58	2	1	1010	0	1505
DR_005868-RA	DR_011098-RA	94.97	2745	138	0	1	2745	0	4347
DR_005863-RA	DR_011103-RA	93.7	1460	87	2	1	1459	0	2155
DR_005872-RA	DR_011094-RA	93.43	2909	185	1	1	2903	0	4254
DR_005885-RA	DR_011081-RA	95.53	1343	60	0	1	1343	0	2187
DR_005898-RA	DR_002878-RA	95.95	5803	235	0	1	5803	0	9640
DR_005898-RA	DR_002878-RA	100	34	0	0	5916	5949	9e-11	67.9
DR_005915-RA	DR_002859-RA	94.98	2170	109	0	1	2170	0	3437
DR_005900-RA	DR_002875-RA	93.65	1952	124	0	1469	3420	0	2886
DR_005900-RA	DR_002875-RA	93.99	1464	82	1	3	1466	0	2206
DR_005902-RA	DR_002873-RA	94.79	902	47	0	1	902	0	1415
DR_005903-RA	DR_002872-RA	94.94	968	49	0	1	968	0	1530
DR_005899-RA	DR_002876-RA	95.67	1017	44	0	16	1032	0	1667
DR_013389-RA	DR_008656-RA	92.99	913	64	0	1	913	0	1302
DR_013392-RA	DR_008659-RA	93.75	1777	97	3	1	1766	0	2640
DR_013386-RA	DR_008653-RA	92.01	1076	84	2	1	1076	0	1435
DR_011042-RA	DR_010074-RA	94.27	1850	106	0	1	1850	0	2827
DR_011030-RA	DR_010084-RA	95.08	651	32	0	300	950	0	1037
DR_011030-RA	DR_010084-RA	91.38	116	10	0	11	126	1e-36	151
DR_011041-RA	DR_010075-RA	96.04	1236	49	0	7	1242	0	2062
DR_011041-RA	DR_010075-RA	95.03	181	9	0	1260	1440	1e-77	287
DR_011049-RA	DR_010067-RA	95.3	9546	449	0	1	9546	0	15360
DR_013519-RA	DR_008279-RA	95.36	2112	95	1	1	2109	0	3406
DR_013517-RA	DR_008281-RA	96.37	579	21	0	1	579	0	981
DR_008379-RA	DR_003622-RA	91.44	1156	97	2	1	1155	0	1491
DR_008377-RA	DR_003624-RA	90.48	987	94	0	78	1064	0	1211
DR_008388-RA	DR_003613-RA	96.37	1158	39	1	31	1185	0	1959
DR_008390-RA	DR_003611-RA	92.81	320	23	0	1	320	9e-128	452
DR_008386-RA	DR_003615-RA	94	1350	81	0	1	1350	0	2034
DR_008378-RA	DR_003623-RA	92.31	455	35	0	240	694	2e-179	624
DR_008378-RA	DR_003623-RA	88.36	189	22	0	1	189	1e-51	200
DR_008396-RA	DR_003605-RA	93.89	916	56	0	297	1212	0	1372
DR_008399-RA	DR_003602-RA	94.87	1462	75	0	132	1593	0	2303
DR_008399-RA	DR_003602-RA	91.6	131	11	0	1	131	6e-43	172
DR_008423-RA	DR_003577-RA	93.6	1110	65	2	1	1110	0	1629
DR_008422-RA	DR_003578-RA	93.52	2762	173	1	1	2762	0	4058
DR_008425-RA	DR_003575-RA	94.89	1468	75	0	1	1468	0	2315
DR_008414-RA	DR_003586-RA	95.57	1107	48	1	4	1109	0	1798
DR_013181-RA	DR_012816-RA	93.84	2451	151	0	1	2451	0	3661
DR_013192-RA	DR_007730-RA	92.58	1374	102	0	6	1379	0	1915
DR_013188-RA	DR_007727-RA	94	750	42	1	96	845	0	1126
DR_010702-RA	DR_010693-RA	94.89	3543	178	1	103	3645	0	5584
DR_010706-RA	DR_010689-RA	93.25	1037	69	1	86	1122	0	1493
DR_010710-RA	DR_010685-RA	96.41	4600	165	0	1	4600	0	7810
DR_010710-RA	DR_010685-RA	97.34	2479	66	0	4683	7161	0	4391
DR_010940-RA	DR_010115-RA	94.31	1529	85	1	28	1556	0	2335
DR_010942-RA	DR_010113-RA	94.43	808	45	0	195	1002	0	1245
DR_010941-RA	DR_010114-RA	94.33	1428	79	2	3	1429	0	2173
DR_007175-RA	DR_013203-RA	94.91	3225	164	0	1	3225	0	5093
DR_007162-RA	DR_004442-RA	93.9	672	35	1	1	666	0	1009
DR_007172-RA	DR_013200-RA	94.57	1142	61	1	372	1513	0	1764
DR_007172-RA	DR_013200-RA	90.29	350	25	1	1	350	4e-121	432
DR_007169-RA	DR_013197-RA	95.06	1133	56	0	1	1133	0	1802
DR_007156-RA	DR_004436-RA	92.54	1943	139	1	1	1943	0	2704
DR_007161-RA	DR_004441-RA	91.01	434	31	2	1	426	2e-156	547
DR_007190-RA	DR_012161-RA	92.82	1532	110	0	24	1555	0	2165
DR_007182-RA	DR_013568-RA	95.86	1642	65	1	1	1639	0	2712
DR_007182-RA	DR_013568-RA	89.96	508	51	0	1849	2356	3e-172	603
DR_006097-RA	DR_004816-RA	95.88	3982	164	0	40	4021	0	6593
DR_006116-RA	DR_004835-RA	96.56	320	11	0	54	373	3e-156	547
DR_006116-RA	DR_004835-RA	100	111	0	0	407	517	9e-58	220
DR_006105-RA	DR_004824-RA	93.14	919	63	0	1	919	0	1322
DR_006114-RA	DR_004833-RA	95.85	1085	45	0	1	1085	0	1794
DR_006103-RA	DR_004822-RA	94.4	946	46	2	100	1038	0	1449
DR_006107-RA	DR_004826-RA	95.08	1464	72	0	1	1464	0	2331
DR_006135-RA	DR_004854-RA	94.1	1356	80	0	1	1356	0	2054
DR_006136-RA	DR_004855-RA	94.32	951	54	0	1	951	0	1457
DR_006127-RA	DR_004846-RA	94.86	1401	72	0	1	1401	0	2206
DR_006125-RA	DR_004844-RA	95.66	3180	138	0	1	3180	0	5210
DR_006134-RA	DR_004853-RA	94.56	1527	83	0	37	1563	0	2369
DR_006147-RA	DR_004785-RA	95.04	1572	78	0	7	1578	0	2498
DR_006167-RA	DR_011530-RA	91.92	1077	84	1	1	1074	0	1441
DR_006150-RA	DR_004788-RA	93.54	789	51	0	417	1205	0	1160
DR_006150-RA	DR_004788-RA	92.58	418	30	1	1	417	3e-164	575
DR_006162-RA	DR_011525-RA	94.86	506	26	0	3	508	0	797
DR_006162-RA	DR_011525-RA	94.48	362	20	0	554	915	1e-159	559
DR_012744-RA	DR_002353-RA	93.11	1830	126	0	1	1830	0	2629
DR_012745-RA	DR_002352-RA	94.13	1329	78	0	1	1329	0	2016
DR_013632-RA	DR_009636-RA	92.51	1335	100	0	37	1371	0	1853
DR_013633-RA	DR_009637-RA	94.71	643	34	0	27	669	0	1005
DR_011390-RA	DR_013752-RA	88.98	708	71	4	10	711	0	759
DR_011358-RA	DR_010317-RA	95.01	701	35	0	996	1696	0	1112
DR_011358-RA	DR_010317-RA	95.11	409	20	0	416	824	0	652
DR_011359-RA	DR_010318-RA	93.82	3153	195	0	1	3153	0	4704
DR_011385-RA	DR_010346-RA	94.22	1781	103	0	4	1784	0	2714
DR_011373-RA	DR_010332-RA	93.17	952	64	1	193	1143	0	1364
DR_010312-RA	DR_006471-RA	93.64	2658	163	1	27	2678	0	3931
DR_010312-RA	DR_006471-RA	97.67	43	1	0	2877	2919	5e-14	77.8
DR_010317-RA	DR_011358-RA	95.01	701	35	0	410	1110	0	1112
DR_010317-RA	DR_011358-RA	95.11	409	20	0	1	409	0	652
DR_010318-RA	DR_011359-RA	93.82	3153	195	0	1	3153	0	4704
DR_010346-RA	DR_011385-RA	94.22	1781	103	0	1	1781	0	2714
DR_010332-RA	DR_011373-RA	93.17	952	64	1	70	1021	0	1364
DR_012375-RA	DR_008295-RA	94.14	1947	108	1	1	1941	0	2958
DR_012364-RA	DR_008285-RA	95.72	2573	110	0	358	2930	0	4228
DR_006575-RA	DR_002710-RA	94.73	1215	64	0	1	1215	0	1901
DR_006622-RA	DR_002754-RA	91.51	1142	91	2	1	1142	0	1487
DR_006598-RA	DR_002733-RA	94.49	1995	103	2	1	1989	0	3077
DR_006608-RA	DR_002742-RA	94.75	952	50	0	886	1837	0	1491
DR_006608-RA	DR_002742-RA	93.48	920	60	0	2062	2981	0	1348
DR_006608-RA	DR_002742-RA	92.14	878	63	1	1	878	0	1195
DR_006619-RA	DR_002752-RA	96.02	1509	51	1	637	2145	0	2524
DR_006619-RA	DR_002752-RA	89.62	453	47	0	159	611	5e-149	525
DR_006595-RA	DR_002730-RA	93.89	311	19	0	17	327	6e-132	466
DR_006594-RA	DR_002729-RA	93.53	2024	131	0	1	2024	0	2974
DR_006594-RA	DR_002729-RA	96.5	1057	37	0	2265	3321	0	1802
DR_006594-RA	DR_002729-RA	92.95	227	16	0	3458	3684	6e-88	323
DR_006594-RA	DR_002729-RA	98.48	132	2	0	2077	2208	1e-64	246
DR_006589-RA	DR_002724-RA	95.07	873	43	0	487	1359	0	1390
DR_006589-RA	DR_002724-RA	93.27	401	27	0	1	401	6e-166	581
DR_006604-RA	DR_002738-RA	93.52	1189	77	0	1	1189	0	1746
DR_006604-RA	DR_002738-RA	94.69	490	26	0	1236	1725	0	765
DR_006592-RA	DR_002727-RA	94.16	1746	102	0	1	1746	0	2652
DR_006592-RA	DR_002727-RA	94.17	532	30	1	1747	2277	0	801
DR_006587-RA	DR_002722-RA	94.17	3587	206	1	980	4563	0	5449
DR_006587-RA	DR_002722-RA	94.15	940	55	0	1	940	0	1427
DR_006636-RA	DR_002767-RA	95.92	3434	140	0	964	4397	0	5697
DR_006636-RA	DR_002767-RA	97.2	964	27	0	1	964	0	1697
DR_006636-RA	DR_002767-RA	94.34	778	40	3	4556	5330	0	1172
DR_008120-RA	DR_006705-RA	95.37	3368	153	1	1	3368	0	5436
DR_008115-RA	DR_006700-RA	94.79	1114	58	0	136	1249	0	1748
DR_008115-RA	DR_006700-RA	94.76	382	20	0	1251	1632	4e-171	599
DR_008115-RA	DR_006700-RA	100	196	0	0	1654	1849	7e-108	389
DR_008115-RA	DR_006700-RA	92.75	138	7	1	1	135	3e-48	190
DR_008122-RA	DR_006707-RA	96.67	2973	99	0	190	3162	0	5109
DR_008122-RA	DR_006707-RA	94.58	166	9	0	1	166	3e-68	258
DR_008139-RA	DR_004881-RA	93.28	238	16	0	366	603	3e-95	345
DR_008139-RA	DR_004881-RA	87.44	207	26	0	31	237	6e-53	204
DR_009746-RA	DR_011574-RA	93.13	1514	104	0	5	1518	0	2177
DR_009751-RA	DR_011579-RA	93.5	3045	189	2	1	3039	0	4464
DR_009758-RA	DR_011586-RA	94.74	1617	85	0	1	1617	0	2531
DR_009757-RA	DR_011585-RA	93.92	6598	401	0	1395	7992	0	9900
DR_009757-RA	DR_011585-RA	93.68	1377	87	0	1	1377	0	2040
DR_009753-RA	DR_011581-RA	92.15	1643	113	8	1	1640	0	2187
DR_009761-RA	DR_011592-RA	94.53	2339	128	0	17	2355	0	3622
DR_013480-RA	DR_001732-RA	95.24	357	17	0	1	357	4e-164	573
DR_004561-RA	DR_006514-RA	94.74	2701	133	2	1	2693	0	4226
DR_004549-RA	DR_006528-RA	95.32	1644	77	0	1	1644	0	2648
DR_004565-RA	DR_006510-RA	92.48	2275	166	1	1	2270	0	3154
DR_004565-RA	DR_006510-RA	90.49	536	51	0	2270	2805	0	658
DR_004564-RA	DR_006511-RA	97.01	735	22	0	1	735	0	1283
DR_004548-RA	DR_006529-RA	96.08	1226	48	0	8	1233	0	2050
DR_004562-RA	DR_006513-RA	93.89	1456	86	1	1	1456	0	2177
DR_004556-RA	DR_006520-RA	95.29	488	23	0	49	536	0	785
DR_004558-RA	DR_006518-RA	95.28	1695	78	2	29	1722	0	2710
DR_004583-RA	DR_006495-RA	94.54	2124	116	0	1	2124	0	3291
DR_004583-RA	DR_006495-RA	93.38	1073	71	0	2140	3212	0	1564
DR_004579-RA	DR_006499-RA	95.22	1359	59	2	1	1356	0	2171
DR_004573-RA	DR_006503-RA	94.23	2790	155	1	214	2997	0	4256
DR_004573-RA	DR_006503-RA	95.12	82	4	0	67	148	4e-30	131
DR_004586-RA	DR_006491-RA	96.12	773	30	0	482	1254	0	1294
DR_004586-RA	DR_006491-RA	94.02	485	29	0	1	485	0	731
DR_004618-RA	DR_005677-RA	95.05	2972	145	2	1	2972	0	4710
DR_007384-RA	DR_003850-RA	92.48	1529	106	5	44	1565	0	2087
DR_007357-RA	DR_003877-RA	94.09	846	50	0	7	852	0	1281
DR_007368-RA	DR_003865-RA	94.62	5055	269	1	1	5052	0	7860
DR_007381-RA	DR_003853-RA	96.09	6576	256	1	1	6576	0	10990
DR_007351-RA	DR_003883-RA	95.22	1484	71	0	12	1495	0	2379
DR_007351-RA	DR_003883-RA	93.9	295	18	0	1494	1788	5e-124	442
DR_007371-RA	DR_003863-RA	92.62	1315	94	1	1210	2521	0	1834
DR_007371-RA	DR_003863-RA	93.51	1125	58	4	1	1110	0	1641
DR_007355-RA	DR_003879-RA	94.76	1891	99	0	1	1891	0	2964
DR_007355-RA	DR_003879-RA	97.73	44	1	0	1999	2042	8e-15	79.8
DR_007377-RA	DR_003856-RA	94.23	208	12	0	133	340	5e-87	317
DR_007377-RA	DR_003856-RA	97.3	148	4	0	341	488	2e-70	262
DR_007389-RA	DR_003845-RA	91.67	588	49	0	103	690	0	777
DR_007389-RA	DR_003845-RA	95.15	103	5	0	1	103	6e-41	165
DR_012177-RA	DR_004193-RA	90.79	2410	209	4	15	2424	0	3003
DR_012196-RA	DR_004177-RA	95.7	1023	44	0	1	1023	0	1679
DR_012191-RA	DR_004183-RA	93.44	854	56	0	63	916	0	1249
DR_012200-RA	DR_004173-RA	94.9	1333	61	5	1	1327	0	2068
DR_012201-RA	DR_004172-RA	95.2	959	46	0	38	996	0	1536
DR_012201-RA	DR_004172-RA	93.37	980	62	2	1608	2586	0	1413
DR_012201-RA	DR_004172-RA	95.19	541	26	0	1012	1552	0	866
DR_012185-RA	DR_013835-RA	91.13	913	81	0	1	913	0	1168
DR_009155-RA	DR_003672-RA	89.09	2484	271	0	897	3380	0	2775
DR_009155-RA	DR_003672-RA	86.62	284	38	0	340	623	2e-69	262
DR_009155-RA	DR_003672-RA	94.9	157	8	0	1	157	3e-65	248
DR_009139-RA	DR_003690-RA	95.5	933	42	0	1	933	0	1516
DR_009145-RA	DR_003681-RA	94.22	778	42	1	1	775	0	1181
DR_009135-RA	DR_003694-RA	94.48	1976	108	1	359	2333	0	3045
DR_009135-RA	DR_003694-RA	96.37	248	9	0	1	248	2e-117	420
DR_009144-RA	DR_003682-RA	95.91	2980	122	0	1	2980	0	4940
DR_009147-RA	DR_003679-RA	95.9	2122	87	0	861	2982	0	3517
DR_009147-RA	DR_003679-RA	95.09	591	29	0	1	591	0	942
DR_009164-RA	DR_008004-RA	93.22	1239	84	0	8	1246	0	1790
DR_009158-RA	DR_013592-RA	94.61	760	41	0	1	760	0	1181
DR_009158-RA	DR_013592-RA	95.4	413	19	0	784	1196	0	668
DR_009172-RA	DR_008013-RA	95.56	6381	283	0	1	6381	0	10410
DR_009157-RA	DR_013593-RA	94.74	1769	93	0	1	1769	0	2769
DR_009360-RA	DR_008709-RA	96.66	1408	47	0	1	1408	0	2418
DR_009329-RA	DR_008677-RA	94.37	6576	367	1	1	6573	0	10100
DR_009365-RA	DR_008713-RA	92.99	856	48	4	1	855	0	1205
DR_009348-RA	DR_008695-RA	91.48	1220	104	0	20	1239	0	1594
DR_009346-RA	DR_008693-RA	93.16	1228	73	5	792	2013	0	1740
DR_009346-RA	DR_008693-RA	94.49	781	43	0	1	781	0	1207
DR_009367-RA	DR_008715-RA	95.34	2510	117	0	1754	4263	0	4048
DR_009367-RA	DR_008715-RA	93.98	1329	72	1	3	1331	0	2006
DR_009367-RA	DR_008715-RA	94.34	424	24	0	1331	1754	0	650
DR_009352-RA	DR_008699-RA	89.82	786	80	0	1	786	0	924
DR_009373-RA	DR_008721-RA	95.16	2232	108	0	2131	4362	0	3568
DR_009373-RA	DR_008721-RA	95.35	1418	60	1	713	2130	0	2290
DR_009373-RA	DR_008721-RA	93.15	613	42	0	1	613	0	882
DR_013354-RA	DR_006548-RA	94	2682	152	1	1	2682	0	4048
DR_013358-RA	DR_006552-RA	94.92	472	24	0	1	472	0	745
DR_013358-RA	DR_006552-RA	100	49	0	0	483	531	9e-21	97.6
DR_005689-RA	DR_008437-RA	95.2	1563	75	0	1	1563	0	2504
DR_005705-RA	DR_008452-RA	94.4	1358	76	0	1	1358	0	2089
DR_005707-RA	DR_008454-RA	93.43	1857	122	0	461	2317	0	2714
DR_005707-RA	DR_008454-RA	88.82	170	19	0	245	414	6e-47	186
DR_005707-RA	DR_008454-RA	91.74	121	10	0	50	170	3e-39	161
DR_005707-RA	DR_008454-RA	95.65	46	2	0	177	222	1e-13	75.8
DR_005702-RA	DR_008449-RA	94.32	1585	90	0	22	1606	0	2428
DR_005710-RA	DR_008457-RA	95.67	323	14	0	6	328	8e-151	529
DR_005710-RA	DR_008457-RA	96.67	240	8	0	328	567	1e-115	412
DR_005727-RA	DR_008476-RA	93.95	1588	84	4	520	2101	0	2371
DR_005734-RA	DR_008483-RA	93.11	842	55	3	1	841	0	1185
DR_005767-RA	DR_009450-RA	93.88	1569	93	1	49	1614	0	2345
DR_005783-RA	DR_009466-RA	95.6	318	14	0	1	318	8e-148	519
DR_005772-RA	DR_009455-RA	94.29	3363	192	0	1	3363	0	5144
DR_005765-RA	DR_009449-RA	95.87	1478	61	0	1	1478	0	2446
DR_005765-RA	DR_009449-RA	94.62	558	30	0	1597	2154	0	868
DR_005779-RA	DR_009462-RA	93.14	2625	177	1	1	2622	0	3772
DR_005763-RA	DR_009447-RA	94.6	1573	85	0	389	1961	0	2444
DR_005763-RA	DR_009447-RA	93.69	428	27	0	1967	2394	0	634
DR_005763-RA	DR_009447-RA	94.89	372	19	0	1	372	2e-167	587
DR_005757-RA	DR_009441-RA	95.31	3479	157	1	1	3479	0	5606
DR_005776-RA	DR_009459-RA	95.75	2800	116	1	1	2797	0	4603
DR_012980-RA	DR_004859-RA	94.89	1643	84	0	112	1754	0	2591
DR_004287-RA	DR_001826-RA	93.02	1161	81	0	1	1161	0	1659
DR_004293-RA	DR_001819-RA	93.48	660	43	0	1	660	0	967
DR_004315-RA	DR_006874-RA	94.68	1072	57	0	21	1092	0	1673
DR_004300-RA	DR_001812-RA	95.99	1470	59	0	1294	2763	0	2446
DR_004300-RA	DR_001812-RA	96	1149	46	0	145	1293	0	1913
DR_004311-RA	DR_006870-RA	94.4	1071	54	3	1	1071	0	1629
DR_004302-RA	DR_006861-RA	94.63	2217	112	2	103	2312	0	3445
DR_004302-RA	DR_006861-RA	93.29	447	30	0	2329	2775	0	648
DR_004302-RA	DR_006861-RA	87.74	106	12	1	1	105	1e-20	99.6
DR_004291-RA	DR_001822-RA	94.03	2127	124	1	803	2926	0	3205
DR_004291-RA	DR_001822-RA	92.33	600	46	0	1	600	0	825
DR_004290-RA	DR_001823-RA	94.43	897	50	0	1108	2004	0	1382
DR_004290-RA	DR_001823-RA	92.78	665	48	0	423	1087	0	938
DR_004290-RA	DR_001823-RA	95.74	423	18	0	1	423	0	696
DR_004312-RA	DR_006871-RA	95.62	1986	87	0	12	1997	0	3247
DR_004303-RA	DR_006862-RA	95.93	2528	102	1	240	2767	0	4187
DR_004303-RA	DR_006862-RA	95.45	154	7	0	86	239	5e-66	250
DR_004316-RA	DR_006875-RA	93.84	1526	94	0	29	1554	0	2280
DR_004341-RA	DR_006901-RA	94.79	1170	61	0	1	1170	0	1836
DR_004330-RA	DR_006889-RA	95.4	3020	138	1	19	3038	0	4877
DR_004325-RA	DR_006884-RA	95.34	3454	161	0	1	3454	0	5570
DR_004325-RA	DR_006884-RA	93.76	1378	80	2	3457	4834	0	2042
DR_004325-RA	DR_006884-RA	86.14	101	8	1	4872	4966	5e-18	91.7
DR_004325-RA	DR_006884-RA	97.62	42	1	0	4982	5023	3e-13	75.8
DR_004319-RA	DR_006878-RA	96.37	1074	39	0	970	2043	0	1820
DR_004319-RA	DR_006878-RA	96.66	987	33	0	2251	3237	0	1695
DR_004319-RA	DR_006878-RA	97.85	511	11	0	437	947	0	926
DR_004319-RA	DR_006878-RA	94.33	423	24	0	1	423	0	648
DR_009789-RA	DR_011225-RA	95.42	939	43	0	1	939	0	1520
DR_009793-RA	DR_011229-RA	96.7	636	21	0	1	636	0	1094
DR_009807-RA	DR_011000-RA	95.68	1272	55	0	1	1272	0	2085
DR_013709-RA	DR_000514-RA	95.31	704	33	0	1	704	0	1134
DR_013709-RA	DR_000514-RA	95.63	503	22	0	948	1450	0	823
DR_006719-RA	DR_009586-RA	94.3	5049	279	2	1	5049	0	7723
DR_006737-RA	DR_009567-RA	94.14	3723	212	1	1	3717	0	5654
DR_006720-RA	DR_009585-RA	92.95	1361	96	0	593	1953	0	1937
DR_006720-RA	DR_009585-RA	94.38	534	30	0	5	538	0	821
DR_006730-RA	DR_009574-RA	96.37	551	20	0	1	551	0	934
DR_006764-RA	DR_002675-RA	93.96	778	45	2	3	780	0	1154
DR_006779-RA	DR_002690-RA	95.26	3205	152	0	51	3255	0	5148
DR_006756-RA	DR_002668-RA	94.13	3439	202	0	1	3439	0	5216
DR_006763-RA	DR_002674-RA	93.38	1994	129	1	590	2580	0	2902
DR_006763-RA	DR_002674-RA	94.97	557	26	2	10	564	0	866
DR_006776-RA	DR_002687-RA	94.94	1305	66	0	1	1305	0	2064
DR_006776-RA	DR_002687-RA	98.04	51	1	0	1306	1356	4e-19	93.7
DR_006771-RA	DR_002682-RA	95.09	672	33	0	1	672	0	1070
DR_006781-RA	DR_002692-RA	95.77	1465	62	0	270	1734	0	2413
DR_009549-RA	DR_013770-RA	94.39	624	35	0	1	624	0	959
DR_001678-RA	DR_013870-RA	91.93	1413	114	0	1	1413	0	1897
DR_001678-RA	DR_013870-RA	92.61	961	71	0	1582	2542	0	1342
DR_001698-RA	DR_013925-RA	92.75	262	19	0	381	642	2e-102	369
DR_001698-RA	DR_013925-RA	90.68	161	15	0	28	188	1e-51	200
DR_001698-RA	DR_013925-RA	88.52	61	7	0	214	274	4e-11	65.9
DR_001722-RA	DR_013857-RA	93.83	1037	60	3	1	1035	0	1526
DR_001732-RA	DR_013480-RA	95.24	357	17	0	1	357	4e-164	573
DR_001803-RA	DR_010669-RA	94.48	1195	66	0	1	1195	0	1846
DR_001799-RA	DR_010665-RA	92.82	961	68	1	5	964	0	1350
DR_001801-RA	DR_010667-RA	94.75	990	52	0	4	993	0	1550
DR_001801-RA	DR_010667-RA	97.37	76	2	0	1217	1292	1e-31	135
DR_001762-RA	DR_012091-RA	95.87	1113	46	0	1	1113	0	1842
DR_001793-RA	DR_011763-RA	94.1	3545	203	1	1	3539	0	5372
DR_001793-RA	DR_011763-RA	91.24	354	31	0	3892	4245	7e-128	456
DR_001793-RA	DR_011763-RA	90.91	143	13	0	3591	3733	6e-45	180
DR_001756-RA	DR_012096-RA	93.89	2553	153	1	1	2553	0	3820
DR_013004-RA	DR_003958-RA	95.17	2341	109	3	8	2344	0	3723
DR_013004-RA	DR_003958-RA	85.82	134	17	2	2411	2544	1e-20	99.6
DR_013014-RA	DR_003967-RA	95.07	1035	45	1	1	1035	0	1649
DR_012999-RA	DR_003953-RA	94.99	1238	60	1	1	1236	0	1957
DR_013430-RA	DR_003190-RA	93	2085	137	1	1	2085	0	2983
DR_013674-RA	DR_004042-RA	94.03	1492	89	0	1	1492	0	2252
DR_013670-RA	DR_004039-RA	90.2	694	63	2	1	690	0	827
DR_013668-RA	DR_004037-RA	87.54	634	79	0	927	1560	0	630
DR_013668-RA	DR_004037-RA	84.94	551	83	0	66	616	1e-121	434
DR_013668-RA	DR_004037-RA	93.94	99	6	0	649	747	8e-36	149
DR_004898-RA	DR_012663-RA	96.53	1209	42	0	1	1209	0	2064
DR_004899-RA	DR_012664-RA	92.57	3865	278	3	537	4398	0	5374
DR_004899-RA	DR_012664-RA	92.58	256	19	0	277	532	5e-98	357
DR_004900-RA	DR_012665-RA	96.06	1597	63	0	1	1597	0	2666
DR_004897-RA	DR_012662-RA	95.72	1938	83	0	1	1938	0	3184
DR_004926-RA	DR_010835-RA	95.01	501	16	1	1	492	0	803
DR_004906-RA	DR_012671-RA	94.92	2994	152	0	2335	5328	0	4730
DR_004906-RA	DR_012671-RA	95.37	1575	73	0	321	1895	0	2543
DR_004906-RA	DR_012671-RA	95.44	285	13	0	2010	2294	1e-129	462
DR_004906-RA	DR_012671-RA	97.92	48	1	0	266	313	9e-17	87.7
DR_004915-RA	DR_013333-RA	92.08	1048	81	1	1	1046	0	1413
DR_004918-RA	DR_013337-RA	94.37	764	41	1	36	799	0	1168
DR_004909-RA	DR_013326-RA	97.13	453	13	0	1	453	0	795
DR_004957-RA	DR_012491-RA	92.53	9152	666	5	5711	14856	0	12710
DR_004957-RA	DR_012491-RA	94.64	3340	177	2	2326	5664	0	5186
DR_004957-RA	DR_012491-RA	93.55	2200	142	0	41	2240	0	3235
DR_004934-RA	DR_010843-RA	94.65	4839	259	0	1	4839	0	7539
DR_004936-RA	DR_010845-RA	94.02	1437	86	0	1	1437	0	2167
DR_004941-RA	DR_010850-RA	93.45	1237	81	0	537	1773	0	1810
DR_004941-RA	DR_010850-RA	87.68	544	67	0	1	544	1e-155	547
DR_004942-RA	DR_010851-RA	93.37	1417	94	0	1	1417	0	2064
DR_004932-RA	DR_010841-RA	94.25	1774	95	4	6	1777	0	2682
DR_004956-RA	DR_012492-RA	91.71	748	58	2	28	772	0	979
DR_004933-RA	DR_010842-RA	93.02	1519	106	0	1	1519	0	2171
DR_004944-RA	DR_010853-RA	95.8	1237	49	1	1	1234	0	2036
DR_004950-RA	DR_011886-RA	91.79	1389	114	0	1	1389	0	1850
DR_004949-RA	DR_011888-RA	94.26	1062	53	1	8	1069	0	1628
DR_004949-RA	DR_011888-RA	93.61	1017	65	0	1114	2130	0	1501
DR_005499-RA	DR_010796-RA	92.09	834	62	1	16	849	0	1128
DR_005499-RA	DR_005500-RA	100	45	0	0	959	1003	4e-18	89.7
DR_005506-RA	DR_010789-RA	92.37	1323	101	0	24	1346	0	1822
DR_005498-RA	DR_010797-RA	94.99	1738	84	1	134	1868	0	2752
DR_005498-RA	DR_010797-RA	91.67	108	9	0	9	116	6e-34	143
DR_005511-RA	DR_010784-RA	96.72	1768	58	0	1	1768	0	3045
DR_005513-RA	DR_010782-RA	93.9	852	52	0	5	856	0	1277
DR_005500-RA	DR_010795-RA	96.77	651	21	0	96	746	0	1124
DR_005500-RA	DR_005499-RA	100	45	0	0	841	885	4e-18	89.7
DR_005528-RA	DR_003528-RA	94.3	1122	61	1	184	1305	0	1713
DR_005528-RA	DR_003528-RA	92.86	168	12	0	1	168	1e-62	238
DR_005522-RA	DR_010775-RA	94.69	2261	120	0	1	2261	0	3531
DR_005538-RA	DR_003517-RA	93.41	1881	118	1	1497	3371	0	2748
DR_005538-RA	DR_003517-RA	95.96	1237	50	0	91	1327	0	2056
DR_005551-RA	DR_003505-RA	94.63	3275	170	2	3	3277	0	5089
DR_004126-RA	DR_010213-RA	96.17	705	27	0	1	705	0	1183
DR_004107-RA	DR_009504-RA	94.15	1367	73	3	705	2068	0	2060
DR_004107-RA	DR_009504-RA	95.85	627	26	0	19	645	0	1037
DR_004110-RA	DR_009501-RA	95.11	4803	229	2	1	4803	0	7650
DR_004110-RA	DR_009501-RA	97.36	265	7	0	5174	5438	6e-132	470
DR_004110-RA	DR_009501-RA	96.94	98	3	0	5077	5174	8e-42	170
DR_004167-RA	DR_011429-RA	92.6	2216	155	2	2	2211	0	3090
DR_004172-RA	DR_012201-RA	95.2	959	46	0	20	978	0	1536
DR_004172-RA	DR_012201-RA	93.37	980	62	2	1518	2495	0	1413
DR_004172-RA	DR_012201-RA	95.19	541	26	0	979	1519	0	866
DR_004173-RA	DR_012200-RA	94.9	1333	61	5	1	1332	0	2068
DR_004193-RA	DR_012177-RA	90.79	2410	209	4	143	2539	0	3003
DR_004139-RA	DR_011400-RA	95.42	938	42	1	26	962	0	1511
DR_004177-RA	DR_012196-RA	95.7	1023	44	0	1	1023	0	1679
DR_004153-RA	DR_011415-RA	95.85	1544	61	1	532	2072	0	2549
DR_004153-RA	DR_011414-RA	95.56	1058	47	0	2771	3828	0	1725
DR_004153-RA	DR_011414-RA	95	280	14	0	2498	2777	2e-124	444
DR_004153-RA	DR_011414-RA	92.5	120	9	0	2378	2497	9e-41	167
DR_004183-RA	DR_012191-RA	93.44	854	56	0	36	889	0	1249
DR_011241-RA	DR_013763-RA	95.67	3580	155	0	1	3580	0	5868
DR_011247-RA	DR_012562-RA	93.89	1341	79	2	55	1395	0	1994
DR_011236-RA	DR_011434-RA	95.85	2915	121	0	52	2966	0	4819
DR_011251-RA	DR_012567-RA	94.77	860	42	1	1	857	0	1344
DR_011239-RA	DR_011431-RA	95.38	5084	231	2	737	5817	0	8203
DR_011239-RA	DR_011431-RA	93.15	73	5	0	472	544	4e-22	105
DR_011257-RA	DR_012572-RA	94.73	3510	185	0	1	3510	0	5491
DR_011257-RA	DR_012572-RA	93.76	497	29	1	3511	4005	0	733
DR_011242-RA	DR_013762-RA	94.47	4755	254	2	1	4755	0	7339
DR_013496-RA	DR_006467-RA	95.41	6771	311	0	1	6771	0	10960
DR_013496-RA	DR_006467-RA	92.77	857	53	1	7042	7889	0	1215
DR_013509-RA	DR_008664-RA	89.48	1084	105	5	1	1080	0	1213
DR_013508-RA	DR_008663-RA	95.93	2553	104	0	1017	3569	0	4236
DR_013508-RA	DR_008663-RA	92.85	825	53	2	196	1017	0	1160
DR_013508-RA	DR_008663-RA	91.67	144	12	0	1	144	6e-48	190
DR_011849-RA	DR_005368-RA	94.14	1604	87	1	1	1604	0	2438
DR_011861-RA	DR_005358-RA	95.75	2636	110	1	1	2634	0	4331
DR_011854-RA	DR_005364-RA	94.76	1528	80	0	1	1528	0	2395
DR_011865-RA	DR_008944-RA	95.32	834	38	1	29	862	0	1336
DR_010908-RA	DR_009644-RA	94.27	1587	90	1	1	1586	0	2416
DR_010901-RA	DR_009652-RA	94.24	1476	82	1	1	1476	0	2248
DR_010906-RA	DR_009646-RA	94.69	1036	55	0	93	1128	0	1618
DR_010906-RA	DR_009646-RA	94.57	92	5	0	1	92	4e-34	143
DR_010899-RA	DR_009654-RA	93.26	1335	90	0	1	1335	0	1933
DR_005946-RA	DR_009040-RA	93.93	478	29	0	492	969	0	718
DR_005946-RA	DR_009040-RA	95.4	261	12	0	1	261	2e-118	422
DR_005944-RA	DR_009042-RA	94.58	719	39	0	1	719	0	1116
DR_005943-RA	DR_009043-RA	95.28	1463	69	0	1	1463	0	2353
DR_005973-RA	DR_009016-RA	93.19	1365	93	0	7	1371	0	1968
DR_005960-RA	DR_009025-RA	93.45	1756	115	0	1	1756	0	2569
DR_005962-RA	DR_009024-RA	94.83	1547	62	2	1	1529	0	2448
DR_005956-RA	DR_009030-RA	92.62	1666	120	1	1	1666	0	2323
DR_005984-RA	DR_009004-RA	95.44	3704	169	0	1	3704	0	6003
DR_005984-RA	DR_009004-RA	96.47	255	9	0	3841	4095	3e-121	434
DR_005997-RA	DR_001496-RA	94.19	1841	107	0	1	1841	0	2801
DR_005983-RA	DR_009005-RA	94.09	406	24	0	417	822	2e-176	615
DR_005983-RA	DR_009005-RA	92.19	384	30	0	1	384	7e-149	523
DR_013377-RA	DR_003713-RA	91.57	1281	98	6	541	1816	0	1643
DR_008677-RA	DR_009329-RA	94.37	6576	367	1	1	6576	0	10100
DR_008664-RA	DR_013509-RA	89.48	1084	105	5	1	1079	0	1213
DR_008671-RA	DR_010885-RA	95.28	1081	48	1	225	1305	0	1735
DR_008671-RA	DR_010885-RA	92.11	279	18	2	1680	1957	2e-101	367
DR_008671-RA	DR_010885-RA	94.12	238	14	0	1443	1680	1e-99	361
DR_008671-RA	DR_010885-RA	95.14	144	6	1	1	144	9e-58	222
DR_008663-RA	DR_013508-RA	95.93	2553	104	0	645	3197	0	4236
DR_008663-RA	DR_013508-RA	92.85	825	53	2	145	966	0	1160
DR_008663-RA	DR_013508-RA	91.67	144	12	0	1	144	5e-48	190
DR_008713-RA	DR_009365-RA	92.99	856	48	4	1	845	0	1205
DR_008699-RA	DR_009352-RA	89.82	786	80	0	1	786	0	924
DR_008715-RA	DR_009367-RA	95.34	2510	117	0	2083	4592	0	4048
DR_008715-RA	DR_009367-RA	93.98	1329	72	1	1	1321	0	2006
DR_008715-RA	DR_009367-RA	94.34	424	24	0	1411	1834	0	650
DR_008695-RA	DR_009348-RA	91.48	1220	104	0	19	1238	0	1594
DR_008709-RA	DR_009360-RA	96.66	1408	47	0	1	1408	0	2418
DR_008693-RA	DR_009346-RA	93.16	1228	73	5	900	2122	0	1740
DR_008693-RA	DR_009346-RA	94.49	781	43	0	122	902	0	1207
DR_008721-RA	DR_009373-RA	95.16	2232	108	0	2182	4413	0	3568
DR_008721-RA	DR_009373-RA	95.35	1418	60	1	635	2046	0	2290
DR_008721-RA	DR_009373-RA	93.15	613	42	0	1	613	0	882
DR_009669-RA	DR_000098-RA	94.44	1026	56	1	16	1041	0	1574
DR_009657-RA	DR_000086-RA	95.03	1588	79	0	3247	4834	0	2522
DR_009657-RA	DR_000086-RA	94.62	1171	57	2	1	1171	0	1814
DR_009657-RA	DR_000086-RA	97.42	852	22	0	1725	2576	0	1515
DR_009657-RA	DR_000086-RA	95.09	529	26	0	2701	3229	0	842
DR_009657-RA	DR_000086-RA	95.83	288	12	0	1385	1672	9e-134	476
DR_009690-RA	DR_000118-RA	95.52	2432	109	0	1	2432	0	3957
DR_009690-RA	DR_000118-RA	94.75	1333	70	0	2434	3766	0	2087
DR_010975-RA	DR_010380-RA	94.65	729	39	0	16	744	0	1136
DR_010987-RA	DR_012027-RA	93.36	2545	158	6	4	2543	0	3667
DR_009501-RA	DR_004110-RA	95.11	4803	229	2	1	4797	0	7650
DR_009501-RA	DR_004110-RA	97.36	265	7	0	5075	5339	6e-132	470
DR_009501-RA	DR_004110-RA	96.94	98	3	0	4798	4895	8e-42	170
DR_009504-RA	DR_004107-RA	94.15	1367	73	3	726	2088	0	2060
DR_009504-RA	DR_004107-RA	95.85	627	26	0	19	645	0	1037
DR_013835-RA	DR_012185-RA	91.13	913	81	0	1	913	0	1168
DR_010084-RA	DR_011030-RA	95.08	651	32	0	144	794	0	1037
DR_010084-RA	DR_011030-RA	91.38	116	10	0	11	126	1e-36	151
DR_010075-RA	DR_011041-RA	96.04	1236	49	0	7	1242	0	2062
DR_010075-RA	DR_011041-RA	95.03	181	9	0	1242	1422	1e-77	287
DR_010057-RA	DR_007733-RA	93.61	2709	173	0	1	2709	0	3998
DR_010074-RA	DR_011042-RA	94.27	1850	106	0	1	1850	0	2827
DR_010067-RA	DR_011049-RA	95.3	9546	449	0	1	9546	0	15360
DR_006874-RA	DR_004315-RA	94.68	1072	57	0	22	1093	0	1673
DR_006870-RA	DR_004311-RA	94.4	1071	54	3	1	1065	0	1629
DR_006861-RA	DR_004302-RA	94.63	2217	112	2	92	2308	0	3445
DR_006861-RA	DR_004302-RA	93.29	447	30	0	2343	2789	0	648
DR_006861-RA	DR_004302-RA	87.74	106	12	1	1	106	1e-20	99.6
DR_006871-RA	DR_004312-RA	95.62	1986	87	0	13	1998	0	3247
DR_006862-RA	DR_004303-RA	95.93	2528	102	1	234	2760	0	4187
DR_006862-RA	DR_004303-RA	95.45	154	7	0	1	154	5e-66	250
DR_006875-RA	DR_004316-RA	93.84	1526	94	0	1	1526	0	2280
DR_006878-RA	DR_004319-RA	96.37	1074	39	0	1363	2436	0	1820
DR_006878-RA	DR_004319-RA	96.66	987	33	0	2539	3525	0	1695
DR_006878-RA	DR_004319-RA	97.85	511	11	0	716	1226	0	926
DR_006878-RA	DR_004319-RA	94.33	423	24	0	193	615	0	648
DR_006889-RA	DR_004330-RA	95.4	3020	138	1	19	3037	0	4877
DR_006901-RA	DR_004341-RA	94.79	1170	61	0	1	1170	0	1836
DR_006884-RA	DR_004325-RA	95.34	3454	161	0	1	3454	0	5570
DR_006884-RA	DR_004325-RA	93.76	1378	80	2	3511	4882	0	2042
DR_006884-RA	DR_004325-RA	86.14	101	8	1	4911	5011	6e-18	91.7
DR_006884-RA	DR_004325-RA	97.62	42	1	0	5037	5078	3e-13	75.8
DR_003536-RA	DR_007516-RA	94.77	1969	103	0	61	2029	0	3087
DR_003562-RA	DR_007541-RA	97.57	576	14	0	1	576	0	1031
DR_003553-RA	DR_007533-RA	97.6	250	6	0	84	333	2e-126	448
DR_003553-RA	DR_007533-RA	97.44	78	2	0	334	411	2e-33	139
DR_003553-RA	DR_007533-RA	93.98	83	5	0	1	83	3e-29	125
DR_003578-RA	DR_008422-RA	93.52	2762	173	1	1	2756	0	4058
DR_003575-RA	DR_008425-RA	94.89	1468	75	0	1	1468	0	2315
DR_003586-RA	DR_008414-RA	95.57	1107	48	1	28	1134	0	1798
DR_003577-RA	DR_008423-RA	93.6	1110	65	2	1	1104	0	1629
DR_003615-RA	DR_008386-RA	94	1350	81	0	1	1350	0	2034
DR_003623-RA	DR_008378-RA	92.31	455	35	0	189	643	2e-179	624
DR_003623-RA	DR_008378-RA	88.36	189	22	0	1	189	1e-51	200
DR_003605-RA	DR_008396-RA	93.89	916	56	0	12	927	0	1372
DR_003624-RA	DR_008377-RA	90.48	987	94	0	77	1063	0	1211
DR_003602-RA	DR_008399-RA	94.87	1462	75	0	207	1668	0	2303
DR_003602-RA	DR_008399-RA	91.6	131	11	0	28	158	6e-43	172
DR_003622-RA	DR_008379-RA	91.44	1156	97	2	1	1155	0	1491
DR_003613-RA	DR_008388-RA	96.37	1158	39	1	110	1267	0	1959
DR_003611-RA	DR_008390-RA	92.81	320	23	0	1	320	1e-127	452
DR_013682-RA	DR_005376-RA	94.11	1086	64	0	19	1104	0	1645
DR_008620-RA	DR_011816-RA	91.53	378	32	0	55	432	8e-141	496
DR_008656-RA	DR_013389-RA	92.99	913	64	0	2	914	0	1302
DR_008659-RA	DR_013392-RA	93.75	1777	97	3	1	1774	0	2640
DR_008649-RA	DR_011785-RA	92.71	1522	110	1	1	1522	0	2129
DR_008648-RA	DR_011786-RA	95.14	1050	51	0	1	1050	0	1677
DR_008653-RA	DR_013386-RA	92.01	1076	84	2	1	1074	0	1435
DR_008650-RA	DR_011784-RA	95.37	1685	78	0	7	1691	0	2722
DR_008650-RA	DR_011785-RA	95.82	287	12	0	1405	1691	1e-133	474
DR_008643-RA	DR_011792-RA	95.47	1348	58	1	112	1459	0	2185
DR_008643-RA	DR_011792-RA	100	39	0	0	1	39	2e-14	77.8
DR_008641-RA	DR_011794-RA	96.72	519	17	0	1	519	0	894
DR_013409-RA	DR_013648-RA	92.58	633	47	0	1	633	0	882
DR_013055-RA	DR_007147-RA	94.2	4773	274	1	1294	6066	0	7261
DR_013055-RA	DR_007147-RA	94.61	835	42	1	1	832	0	1294
DR_013055-RA	DR_007147-RA	92.2	436	34	0	854	1289	2e-169	595
DR_009455-RA	DR_005772-RA	94.29	3363	192	0	1	3363	0	5144
DR_009487-RA	DR_013689-RA	90.97	2336	202	3	1	2336	0	2946
DR_009491-RA	DR_013693-RA	92.69	1451	105	1	1	1450	0	2028
DR_009477-RA	DR_012353-RA	94.95	732	35	1	22	751	0	1152
DR_009466-RA	DR_005783-RA	95.6	318	14	0	1	318	4e-148	519
DR_009449-RA	DR_005765-RA	95.87	1478	61	0	1	1478	0	2446
DR_009449-RA	DR_005765-RA	94.62	558	30	0	1477	2034	0	868
DR_009450-RA	DR_005767-RA	93.88	1569	93	1	1	1569	0	2345
DR_009447-RA	DR_005763-RA	94.6	1573	85	0	404	1976	0	2444
DR_009447-RA	DR_005763-RA	93.69	428	27	0	1994	2421	0	634
DR_009447-RA	DR_005763-RA	94.89	372	19	0	1	372	2e-167	587
DR_009482-RA	DR_012348-RA	94.63	3294	177	0	490	3783	0	5126
DR_009482-RA	DR_012348-RA	93.9	459	28	0	1	459	0	688
DR_009441-RA	DR_005757-RA	95.31	3479	157	1	44	3516	0	5606
DR_009486-RA	DR_013688-RA	94.13	1346	79	0	17	1362	0	2042
DR_009459-RA	DR_005776-RA	95.75	2800	116	1	1	2800	0	4603
DR_009462-RA	DR_005779-RA	93.14	2625	177	1	1	2625	0	3772
DR_012675-RA	DR_003934-RA	93.03	1349	92	2	1	1349	0	1913
DR_009636-RA	DR_013632-RA	92.51	1335	100	0	37	1371	0	1853
DR_009654-RA	DR_010899-RA	93.26	1335	90	0	1	1335	0	1933
DR_009646-RA	DR_010906-RA	94.69	1036	55	0	312	1347	0	1618
DR_009646-RA	DR_010906-RA	94.57	92	5	0	1	92	4e-34	143
DR_009644-RA	DR_010908-RA	94.27	1587	90	1	1	1587	0	2416
DR_009652-RA	DR_010901-RA	94.24	1476	82	1	1	1473	0	2248
DR_009637-RA	DR_013633-RA	94.71	643	34	0	27	669	0	1005
DR_008004-RA	DR_009164-RA	93.22	1239	84	0	8	1246	0	1790
DR_008013-RA	DR_009172-RA	95.56	6381	283	0	1	6381	0	10410
DR_008022-RA	DR_011900-RA	95.31	3856	178	1	1	3856	0	6205
DR_008026-RA	DR_011905-RA	93.72	1592	100	0	1	1592	0	2363
DR_008026-RA	DR_011905-RA	92.46	305	23	0	1574	1878	4e-118	422
DR_001233-RA	DR_013715-RA	94.42	735	41	0	1	735	0	1132
DR_001245-RA	DR_005302-RA	94.67	1106	59	0	284	1389	0	1725
DR_001245-RA	DR_005302-RA	95.76	283	12	0	1	283	2e-131	466
DR_001256-RA	DR_005313-RA	95.36	1464	68	0	1	1464	0	2363
DR_001261-RA	DR_005318-RA	96.02	502	19	1	1	502	0	829
DR_001266-RA	DR_005324-RA	93.86	1319	81	0	29	1347	0	1972
DR_001277-RA	DR_011151-RA	95.2	813	39	0	1	813	0	1302
DR_001307-RA	DR_008227-RA	94.74	2778	146	0	1	2778	0	4349
DR_001326-RA	DR_008245-RA	93.75	672	42	0	15	686	0	999
DR_001328-RA	DR_008247-RA	96.69	906	30	0	77	982	0	1558
DR_001328-RA	DR_008247-RA	97.92	48	1	0	1	48	2e-17	87.7
DR_001319-RA	DR_008238-RA	95.78	3836	162	0	1	3836	0	6320
DR_001335-RA	DR_008255-RA	95.08	3051	148	2	1	3049	0	4843
DR_001354-RA	DR_005353-RA	94.82	4109	204	3	1	4109	0	6445
DR_001360-RA	DR_005346-RA	90.95	1536	139	0	1	1536	0	1943
DR_001342-RA	DR_008263-RA	94.38	2276	119	2	31	2297	0	3495
DR_001344-RA	DR_008265-RA	93.87	815	50	0	518	1332	0	1219
DR_001344-RA	DR_008265-RA	96.45	451	13	1	21	468	0	763
DR_009729-RA	DR_006827-RA	90.61	1001	94	0	1	1001	0	1239
DR_009740-RA	DR_006816-RA	94.75	4168	219	0	1	4168	0	6526
DR_009704-RA	DR_006854-RA	94.1	1593	94	0	1294	2886	0	2413
DR_009704-RA	DR_006854-RA	91.74	218	18	0	2885	3102	1e-77	289
DR_009704-RA	DR_006855-RA	94.82	1293	67	0	1	1293	0	2032
DR_009717-RA	DR_006840-RA	93.61	673	41	1	1	673	0	987
DR_009699-RA	DR_006859-RA	94.55	3303	180	0	1	3303	0	5120
DR_013551-RA	DR_013098-RA	95.68	2360	102	0	2	2361	0	3870
DR_013762-RA	DR_011242-RA	94.47	4755	254	2	1	4746	0	7339
DR_013763-RA	DR_011241-RA	95.67	3580	155	0	1	3580	0	5868
DR_007392-RA	DR_001994-RA	92.61	4167	308	0	471	4637	0	5818
DR_007392-RA	DR_001994-RA	94.65	1196	64	0	5660	6855	0	1863
DR_007392-RA	DR_001994-RA	93.84	503	31	0	4813	5315	0	751
DR_007392-RA	DR_001994-RA	94.3	421	24	0	1	421	0	644
DR_007392-RA	DR_001994-RA	100	80	0	0	379	458	4e-38	159
DR_007392-RA	DR_001994-RA	98.33	60	1	0	205	264	8e-24	111
DR_007403-RA	DR_002007-RA	95.19	810	39	0	1	810	0	1296
DR_007404-RA	DR_002008-RA	94.66	1048	56	0	2345	3392	0	1633
DR_007404-RA	DR_002008-RA	96.38	884	32	0	787	1670	0	1499
DR_007404-RA	DR_002008-RA	94.83	600	31	0	1	600	0	944
DR_007404-RA	DR_002008-RA	95.58	498	22	0	1680	2177	0	813
DR_007404-RA	DR_002008-RA	98.46	65	1	0	3391	3455	4e-27	121
DR_007398-RA	DR_002001-RA	95.36	732	34	0	16	747	0	1181
DR_007396-RA	DR_001999-RA	95.79	832	35	0	1	832	0	1372
DR_007438-RA	DR_003455-RA	95.48	2811	127	0	242	3052	0	4565
DR_007438-RA	DR_003455-RA	83.56	225	36	1	4	228	3e-34	145
DR_007420-RA	DR_002024-RA	93.04	761	53	0	1	761	0	1088
DR_007422-RA	DR_002026-RA	95.66	1890	82	0	1	1890	0	3096
DR_007433-RA	DR_003450-RA	94.54	5533	296	2	214	5740	0	8566
DR_007433-RA	DR_003450-RA	91.08	157	14	0	1	157	9e-51	200
DR_007432-RA	DR_003449-RA	95.04	1169	58	0	40	1208	0	1857
DR_007409-RA	DR_002013-RA	92.62	610	45	0	23	632	0	852
DR_007411-RA	DR_002015-RA	94.56	2739	149	0	13	2751	0	4248
DR_007406-RA	DR_002010-RA	95.77	1986	84	0	1	1986	0	3271
DR_007406-RA	DR_002010-RA	96.76	1698	55	0	1987	3684	0	2930
DR_007407-RA	DR_002011-RA	94.4	1197	64	1	5	1198	0	1838
DR_007419-RA	DR_002023-RA	94.32	528	30	0	1	528	0	809
DR_012038-RA	DR_000197-RA	94.85	2896	149	0	62	2957	0	4559
DR_012038-RA	DR_000197-RA	97.11	311	9	0	2971	3281	8e-155	545
DR_012038-RA	DR_000197-RA	91.67	192	16	0	3280	3471	4e-67	254
DR_012048-RA	DR_000189-RA	93.3	1135	70	1	18	1152	0	1649
DR_012048-RA	DR_000189-RA	93.8	371	23	0	1154	1524	1e-157	553
DR_012046-RA	DR_000191-RA	95.11	1392	68	0	463	1854	0	2220
DR_012046-RA	DR_000191-RA	95.56	360	16	0	103	462	1e-167	587
DR_012036-RA	DR_000199-RA	94.21	915	53	0	1	915	0	1394
DR_012047-RA	DR_000190-RA	94.63	1526	81	1	1	1526	0	2367
DR_012731-RA	DR_013115-RA	93.28	3391	222	5	1109	4497	0	4877
DR_012731-RA	DR_013115-RA	92.16	1110	78	2	1	1104	0	1509
DR_006788-RA	DR_007575-RA	91.75	1212	100	0	1	1212	0	1610
DR_006803-RA	DR_007559-RA	96.36	741	27	0	1	741	0	1255
DR_006797-RA	DR_007565-RA	94.41	1092	61	0	1	1092	0	1681
DR_006790-RA	DR_007573-RA	93.15	1634	109	3	1	1633	0	2327
DR_006786-RA	DR_007577-RA	95.32	1989	88	2	1	1986	0	3196
DR_006840-RA	DR_009717-RA	93.61	673	41	1	1	671	0	987
DR_006859-RA	DR_009699-RA	94.55	3303	180	0	1	3303	0	5120
DR_006813-RA	DR_007552-RA	94.68	1692	90	0	1	1692	0	2640
DR_006816-RA	DR_009740-RA	94.75	4168	219	0	1	4168	0	6526
DR_006827-RA	DR_009729-RA	90.61	1001	94	0	3	1003	0	1239
DR_006855-RA	DR_009704-RA	94.82	1293	67	0	1	1293	0	2032
DR_006854-RA	DR_009704-RA	94.1	1593	94	0	1	1593	0	2413
DR_006854-RA	DR_009704-RA	91.74	218	18	0	1610	1827	4e-78	289
DR_012280-RA	DR_012756-RA	93.15	1008	66	1	1	1005	0	1447
DR_012281-RA	DR_012757-RA	92.91	945	67	0	1	945	0	1342
DR_012286-RA	DR_012762-RA	90.89	933	82	1	1	933	0	1172
DR_012283-RA	DR_012759-RA	95.39	607	28	0	1	607	0	981
DR_012283-RA	DR_012759-RA	88.08	562	55	3	705	1264	9e-165	577
DR_010738-RA	DR_002587-RA	94.98	2331	111	1	1	2331	0	3695
DR_010738-RA	DR_002587-RA	94.71	869	46	0	2477	3345	0	1358
DR_011225-RA	DR_009789-RA	95.42	939	43	0	1	939	0	1520
DR_011229-RA	DR_009793-RA	96.7	636	21	0	1	636	0	1094
DR_008558-RA	DR_002048-RA	96.06	2209	84	1	1	2209	0	3685
DR_008546-RA	DR_002034-RA	95.52	714	29	1	457	1170	0	1158
DR_008546-RA	DR_002034-RA	97.84	371	8	0	1	371	0	672
DR_008546-RA	DR_002034-RA	92.81	139	10	0	1171	1309	6e-50	196
DR_008546-RA	DR_002035-RA	94.97	437	22	0	1723	2159	0	692
DR_008546-RA	DR_002035-RA	94.25	226	13	0	2160	2385	1e-94	345
DR_008546-RA	DR_002035-RA	91.14	271	21	1	1379	1646	4e-94	343
DR_008546-RA	DR_002035-RA	100	67	0	0	1644	1710	7e-31	133
DR_008550-RA	DR_002040-RA	94.82	3513	182	0	1	3513	0	5521
DR_008592-RA	DR_002081-RA	95.8	6624	278	0	1	6624	0	10930
DR_008562-RA	DR_008563-RA	100	1015	0	0	367	1381	0	2012
DR_008562-RA	DR_002053-RA	95.47	1015	46	0	367	1381	0	1647
DR_008571-RA	DR_002061-RA	95.83	911	38	0	68	978	0	1505
DR_008571-RA	DR_002061-RA	100	37	0	0	1	37	2e-13	73.8
DR_008570-RA	DR_002060-RA	95.45	572	26	0	11	582	0	928
DR_008579-RA	DR_002069-RA	94.89	548	24	3	6	551	0	842
DR_008589-RA	DR_002078-RA	91.64	933	75	3	199	1130	0	1207
DR_008589-RA	DR_002078-RA	85.99	157	21	1	1	157	6e-30	129
DR_008563-RA	DR_008562-RA	100	1015	0	0	174	1188	0	2012
DR_008563-RA	DR_002053-RA	95.72	1098	47	0	91	1188	0	1804
DR_008568-RA	DR_002058-RA	95.36	582	27	0	1	582	0	940
DR_002903-RA	DR_003066-RA	93.46	2570	165	2	1	2568	0	3749
DR_002903-RA	DR_002904-RA	100	405	0	0	2164	2568	0	803
DR_002903-RA	DR_003065-RA	92.35	405	31	0	2164	2568	2e-158	557
DR_002892-RA	DR_003077-RA	93.72	988	54	2	1	987	0	1463
DR_002906-RA	DR_003063-RA	95.79	3204	117	3	1	3204	0	5287
DR_002904-RA	DR_003065-RA	93.09	1230	85	0	1	1230	0	1764
DR_002904-RA	DR_002903-RA	100	405	0	0	826	1230	0	803
DR_002904-RA	DR_003066-RA	92.35	405	31	0	826	1230	8e-159	557
DR_002893-RA	DR_003076-RA	94.94	2610	132	0	1	2610	0	4127
DR_002900-RA	DR_003069-RA	94.23	867	50	0	1	867	0	1322
DR_002923-RA	DR_003047-RA	94.71	2078	101	1	1	2078	0	3255
DR_002916-RA	DR_003054-RA	95.87	2227	92	0	19	2245	0	3685
DR_002946-RA	DR_003023-RA	92.51	934	70	0	294	1227	0	1296
DR_002946-RA	DR_003023-RA	88.19	254	21	1	16	269	2e-73	274
DR_002946-RA	DR_003023-RA	95.65	69	3	0	1261	1329	4e-25	113
DR_002922-RA	DR_003048-RA	96.24	1729	65	0	1	1729	0	2912
DR_002922-RA	DR_003048-RA	96.8	843	27	0	1918	2760	0	1457
DR_002942-RA	DR_003026-RA	95.17	1448	70	0	1	1448	0	2315
DR_002942-RA	DR_003026-RA	95.78	427	18	0	1492	1918	0	704
DR_002925-RA	DR_003045-RA	95.59	2040	81	1	1	2040	0	3338
DR_002925-RA	DR_003045-RA	93.95	215	13	0	2248	2462	4e-88	323
DR_002928-RA	DR_003042-RA	94.09	3874	229	0	1	3874	0	5864
DR_002937-RA	DR_003032-RA	92.8	889	64	0	112	1000	0	1255
DR_002960-RA	DR_003010-RA	94.47	3944	218	0	1	3944	0	6090
DR_002960-RA	DR_003010-RA	92.02	238	13	1	4230	4467	7e-88	323
DR_002958-RA	DR_003012-RA	93.72	924	54	2	1	921	0	1360
DR_002964-RA	DR_003006-RA	93.61	2192	133	3	121	2311	0	3219
DR_002964-RA	DR_003006-RA	86.46	96	12	1	8	103	9e-15	79.8
DR_002947-RA	DR_003022-RA	93.56	1041	67	0	1	1041	0	1532
DR_002955-RA	DR_003015-RA	93.73	1436	90	0	419	1854	0	2133
DR_002948-RA	DR_003021-RA	93.41	911	60	0	1	911	0	1330
DR_002993-RA	DR_004372-RA	94.9	1667	85	0	1313	2979	0	2631
DR_002993-RA	DR_004372-RA	95.4	348	16	0	124	471	3e-160	563
DR_002993-RA	DR_004372-RA	94.43	287	16	0	793	1079	8e-124	442
DR_002993-RA	DR_004372-RA	94.87	78	4	0	441	518	9e-28	123
DR_002984-RA	DR_004381-RA	94	1300	74	2	44	1343	0	1947
DR_013531-RA	DR_008890-RA	95.61	3076	135	0	58	3133	0	5027
DR_002594-RA	DR_013602-RA	94.05	2067	123	0	1	2067	0	3122
DR_002587-RA	DR_010738-RA	94.98	2331	111	1	1	2325	0	3695
DR_002587-RA	DR_010738-RA	94.71	869	46	0	2324	3192	0	1358
DR_002601-RA	DR_005289-RA	90.78	879	72	3	9	879	0	1088
DR_002598-RA	DR_005292-RA	95.29	1232	58	0	36	1267	0	1982
DR_002598-RA	DR_005292-RA	94.61	445	24	0	1451	1895	0	692
DR_002654-RA	DR_007027-RA	95.21	1044	50	0	1	1044	0	1673
DR_002629-RA	DR_007003-RA	91.92	495	34	2	10	499	0	656
DR_002629-RA	DR_007003-RA	90.32	124	12	0	555	678	9e-37	151
DR_002631-RA	DR_007004-RA	94.74	7491	394	0	1	7491	0	11730
DR_002622-RA	DR_006996-RA	94.77	1529	80	0	1	1529	0	2397
DR_002635-RA	DR_007008-RA	95.91	1125	46	0	335	1459	0	1865
DR_002635-RA	DR_007008-RA	95.24	336	16	0	1	336	2e-153	539
DR_002624-RA	DR_006998-RA	94.58	1272	69	0	1	1272	0	1974
DR_012523-RA	DR_003653-RA	93.61	1425	91	0	1	1425	0	2103
DR_012532-RA	DR_003663-RA	94.57	1179	61	1	1	1179	0	1826
DR_012527-RA	DR_003658-RA	96.22	978	37	0	1	978	0	1645
DR_011709-RA	DR_004735-RA	96.12	1675	65	0	1629	3303	0	2805
DR_011709-RA	DR_004735-RA	95.61	1254	55	0	313	1566	0	2050
DR_011697-RA	DR_004723-RA	93.46	1009	66	0	1	1009	0	1477
DR_010247-RA	DR_010615-RA	93.91	2528	141	3	52	2569	0	3786
DR_010247-RA	DR_010248-RA	100	219	0	0	2351	2569	2e-121	434
DR_010247-RA	DR_010616-RA	97.26	219	6	0	2351	2569	3e-107	387
DR_010251-RA	DR_010619-RA	95.51	802	36	0	19	820	0	1304
DR_010251-RA	DR_010619-RA	95.86	266	11	0	866	1131	1e-123	440
DR_010251-RA	DR_010619-RA	95.52	67	3	0	1131	1197	5e-24	109
DR_010213-RA	DR_004126-RA	96.17	705	27	0	1	705	0	1183
DR_010222-RA	DR_010592-RA	96.1	1512	59	0	1	1512	0	2529
DR_010260-RA	DR_010627-RA	95.56	4303	185	1	1	4303	0	7018
DR_010248-RA	DR_010616-RA	95.63	664	28	1	5	667	0	1078
DR_010248-RA	DR_010247-RA	100	219	0	0	449	667	4e-122	434
DR_010248-RA	DR_010615-RA	97.26	219	6	0	449	667	9e-108	387
DR_010259-RA	DR_010626-RA	94.1	3239	191	0	1	3239	0	4906
DR_010250-RA	DR_010618-RA	90.97	930	73	4	3	925	0	1160
DR_010254-RA	DR_010622-RA	95.11	1023	50	0	1	1023	0	1631
DR_010236-RA	DR_010606-RA	94.63	1154	62	0	1	1154	0	1796
DR_010236-RA	DR_010606-RA	95.36	194	9	0	1213	1406	2e-85	313
DR_013748-RA	DR_011305-RA	95.05	1393	65	2	13	1405	0	2202
DR_010843-RA	DR_004934-RA	94.65	4839	259	0	1	4839	0	7539
DR_010835-RA	DR_004926-RA	95.01	501	16	1	1	501	0	803
DR_010845-RA	DR_004936-RA	94.02	1437	86	0	145	1581	0	2167
DR_010850-RA	DR_004941-RA	93.45	1237	81	0	558	1794	0	1810
DR_010850-RA	DR_004941-RA	87.68	544	67	0	1	544	1e-155	547
DR_010851-RA	DR_004942-RA	93.37	1417	94	0	1	1417	0	2064
DR_010841-RA	DR_004932-RA	94.25	1774	95	4	1	1769	0	2682
DR_010842-RA	DR_004933-RA	93.02	1519	106	0	1	1519	0	2171
DR_010856-RA	DR_007736-RA	95.12	2825	138	0	1	2825	0	4506
DR_010853-RA	DR_004944-RA	95.8	1237	49	1	1	1237	0	2036
DR_003006-RA	DR_002964-RA	93.61	2192	133	3	104	2289	0	3219
DR_003006-RA	DR_002964-RA	86.46	96	12	1	8	102	9e-15	79.8
DR_003010-RA	DR_002960-RA	94.47	3944	218	0	1	3944	0	6090
DR_003010-RA	DR_002960-RA	92.02	238	13	1	3945	4176	7e-88	323
DR_003012-RA	DR_002958-RA	93.72	924	54	2	1	923	0	1360
DR_003015-RA	DR_002955-RA	93.73	1436	90	0	24	1459	0	2133
DR_003032-RA	DR_002937-RA	92.8	889	64	0	1	889	0	1255
DR_003026-RA	DR_002942-RA	95.17	1448	70	0	1	1448	0	2315
DR_003026-RA	DR_002942-RA	95.78	427	18	0	1447	1873	0	704
DR_003042-RA	DR_002928-RA	94.09	3874	229	0	1	3874	0	5864
DR_003022-RA	DR_002947-RA	93.56	1041	67	0	1	1041	0	1532
DR_003048-RA	DR_002922-RA	96.24	1729	65	0	18	1746	0	2912
DR_003048-RA	DR_002922-RA	96.8	843	27	0	1746	2588	0	1457
DR_003021-RA	DR_002948-RA	93.41	911	60	0	516	1426	0	1330
DR_003047-RA	DR_002923-RA	94.71	2078	101	1	1	2069	0	3255
DR_003023-RA	DR_002946-RA	92.51	934	70	0	261	1194	0	1296
DR_003023-RA	DR_002946-RA	88.19	254	21	1	16	260	2e-73	274
DR_003023-RA	DR_002946-RA	95.65	69	3	0	1228	1296	4e-25	113
DR_003045-RA	DR_002925-RA	95.59	2040	81	1	1	2031	0	3338
DR_003045-RA	DR_002925-RA	93.95	215	13	0	2032	2246	4e-88	323
DR_003069-RA	DR_002900-RA	94.23	867	50	0	79	945	0	1322
DR_003065-RA	DR_002904-RA	93.09	1230	85	0	1	1230	0	1764
DR_003065-RA	DR_003066-RA	100	405	0	0	826	1230	0	803
DR_003065-RA	DR_002903-RA	92.35	405	31	0	826	1230	8e-159	557
DR_003063-RA	DR_002906-RA	95.79	3204	117	3	1	3186	0	5287
DR_003066-RA	DR_002903-RA	93.46	2570	165	2	1	2569	0	3749
DR_003066-RA	DR_003065-RA	100	405	0	0	2165	2569	0	803
DR_003066-RA	DR_002904-RA	92.35	405	31	0	2165	2569	2e-158	557
DR_003054-RA	DR_002916-RA	95.87	2227	92	0	7	2233	0	3685
DR_003080-RA	DR_008886-RA	93.97	1625	98	0	1	1625	0	2444
DR_003088-RA	DR_008878-RA	92.89	450	32	0	5	454	0	638
DR_003088-RA	DR_008878-RA	95.52	134	6	0	469	602	4e-57	218
DR_003076-RA	DR_002893-RA	94.94	2610	132	0	1	2610	0	4127
DR_003077-RA	DR_002892-RA	93.72	988	54	2	1	981	0	1463
DR_003099-RA	DR_004754-RA	94.08	710	42	0	113	822	0	1074
DR_003099-RA	DR_004754-RA	93.94	66	4	0	1	66	4e-21	99.6
DR_003112-RA	DR_004765-RA	93.91	345	21	0	3	347	2e-147	517
DR_011833-RA	DR_003479-RA	95.99	7601	305	0	14	7614	0	12650
DR_011830-RA	DR_003482-RA	93.92	1251	73	1	1	1251	0	1873
DR_011829-RA	DR_003483-RA	94.81	2061	103	2	1	2057	0	3225
DR_011829-RA	DR_003483-RA	96.8	845	23	2	2179	3022	0	1449
DR_011845-RA	DR_003467-RA	95.93	786	32	0	103	888	0	1304
DR_011845-RA	DR_003467-RA	100	90	0	0	1	90	5e-45	178
DR_011786-RA	DR_008648-RA	95.14	1050	51	0	1	1050	0	1677
DR_011784-RA	DR_008650-RA	95.37	1685	78	0	7	1691	0	2722
DR_011784-RA	DR_011785-RA	100	291	0	0	1405	1695	1e-164	577
DR_011792-RA	DR_008643-RA	95.47	1348	58	1	196	1540	0	2185
DR_011792-RA	DR_008643-RA	100	39	0	0	158	196	2e-14	77.8
DR_011794-RA	DR_008641-RA	96.72	519	17	0	1	519	0	894
DR_011785-RA	DR_008649-RA	92.71	1522	110	1	1	1521	0	2129
DR_011785-RA	DR_011784-RA	100	291	0	0	1612	1902	1e-164	577
DR_011785-RA	DR_008650-RA	95.82	287	12	0	1616	1902	1e-133	474
DR_011816-RA	DR_008620-RA	91.53	378	32	0	59	436	8e-141	496
DR_013617-RA	DR_012420-RA	95.04	1755	84	1	17	1768	0	2785
DR_013203-RA	DR_007175-RA	94.91	3225	164	0	1	3225	0	5093
DR_013200-RA	DR_007172-RA	94.57	1142	61	1	330	1470	0	1764
DR_013200-RA	DR_007172-RA	90.29	350	25	1	1	341	4e-121	432
DR_013197-RA	DR_007169-RA	95.06	1133	56	0	1	1133	0	1802
DR_006182-RA	DR_002345-RA	93.4	970	64	0	1	970	0	1415
DR_006181-RA	DR_002344-RA	95.4	870	40	0	1	870	0	1407
DR_006193-RA	DR_001980-RA	90.22	1074	104	1	1	1074	0	1289
DR_006201-RA	DR_001972-RA	95.69	3804	164	0	1	3804	0	6240
DR_006201-RA	DR_001972-RA	92.33	587	45	0	3847	4433	0	807
DR_006201-RA	DR_001972-RA	90.03	311	28	1	4406	4716	6e-101	367
DR_006200-RA	DR_001973-RA	93.98	1579	95	0	1	1579	0	2377
DR_006215-RA	DR_001956-RA	93.87	1190	70	1	1	1187	0	1776
DR_006204-RA	DR_001969-RA	94.78	2223	116	0	1	2223	0	3487
DR_006225-RA	DR_012902-RA	92.43	2009	146	1	1	2009	0	2779
DR_006217-RA	DR_001954-RA	95.11	1697	83	0	1	1697	0	2706
DR_006185-RA	DR_001990-RA	94.43	664	37	0	1	664	0	1023
DR_006203-RA	DR_001970-RA	94.72	1648	84	3	1	1646	0	2553
DR_011305-RA	DR_013748-RA	95.05	1393	65	2	1	1389	0	2202
DR_011293-RA	DR_008315-RA	92.2	808	63	0	29	836	0	1102
DR_011289-RA	DR_008310-RA	96.65	358	12	0	275	632	2e-176	615
DR_011289-RA	DR_008310-RA	96.09	128	5	0	1	128	8e-56	214
DR_011289-RA	DR_008310-RA	91.49	141	12	0	655	795	8e-47	184
DR_011299-RA	DR_008321-RA	90.7	935	87	0	23	957	0	1164
DR_011291-RA	DR_008313-RA	93.5	692	45	0	5	696	0	1015
DR_011998-RA	DR_009078-RA	94.55	1467	80	0	1	1467	0	2274
DR_012012-RA	DR_009065-RA	94.39	2211	118	2	1	2208	0	3392
DR_009817-RA	DR_004470-RA	95.58	1650	69	3	12	1659	0	2670
DR_009855-RA	DR_013224-RA	95.86	2802	116	0	1	2802	0	4635
DR_009820-RA	DR_004467-RA	94	2800	168	0	39	2838	0	4218
DR_009824-RA	DR_004463-RA	95.79	1165	49	0	1	1165	0	1921
DR_009822-RA	DR_004465-RA	92.89	1659	115	1	1	1656	0	2349
DR_009840-RA	DR_004448-RA	94.99	1997	100	0	5	2001	0	3166
DR_009842-RA	DR_004446-RA	94.6	426	23	0	552	977	0	662
DR_009842-RA	DR_004446-RA	88.96	317	29	2	1	311	2e-94	343
DR_009842-RA	DR_004446-RA	94.44	90	5	0	415	504	5e-33	139
DR_009842-RA	DR_004446-RA	97.83	46	1	0	503	548	3e-16	83.8
DR_009842-RA	DR_004446-RA	97.62	42	1	0	369	410	6e-14	75.8
DR_009853-RA	DR_013226-RA	97.38	994	26	0	1	994	0	1764
DR_009853-RA	DR_013226-RA	93	257	15	1	1099	1352	3e-100	363
DR_009863-RA	DR_013217-RA	95.86	145	6	0	99	243	7e-64	240
DR_009863-RA	DR_013217-RA	97.75	89	2	0	277	365	5e-40	161
DR_009863-RA	DR_013217-RA	96.15	78	3	0	1	78	4e-31	131
DR_005289-RA	DR_002601-RA	90.78	879	72	3	14	891	0	1088
DR_005292-RA	DR_002598-RA	95.29	1232	58	0	1	1232	0	1982
DR_005292-RA	DR_002598-RA	94.61	445	24	0	1233	1677	0	692
DR_005313-RA	DR_001256-RA	95.36	1464	68	0	1	1464	0	2363
DR_005302-RA	DR_001245-RA	94.67	1106	59	0	512	1617	0	1725
DR_005302-RA	DR_001245-RA	95.76	283	12	0	1	283	3e-131	466
DR_005324-RA	DR_001266-RA	93.86	1319	81	0	10	1328	0	1972
DR_005318-RA	DR_001261-RA	96.02	502	19	1	94	594	0	829
DR_005346-RA	DR_001360-RA	90.95	1536	139	0	1	1536	0	1943
DR_005332-RA	DR_013231-RA	94.22	2749	154	2	1	2744	0	4179
DR_005353-RA	DR_001354-RA	94.82	4109	204	3	313	4412	0	6445
DR_012145-RA	DR_000593-RA	94.41	1412	79	0	1	1412	0	2173
DR_012138-RA	DR_000587-RA	92.79	3329	240	0	1085	4413	0	4696
DR_012138-RA	DR_000587-RA	93.54	1084	67	1	1	1084	0	1590
DR_012148-RA	DR_000596-RA	93.79	2221	126	6	1	2219	0	3273
DR_012149-RA	DR_000597-RA	95.49	1642	74	0	1	1642	0	2668
DR_012141-RA	DR_000590-RA	95.8	381	16	0	1	381	0	628
DR_012141-RA	DR_000590-RA	97.5	40	1	0	432	471	5e-13	71.9
DR_012144-RA	DR_000592-RA	94.53	2853	156	0	5196	8048	0	4419
DR_012144-RA	DR_000592-RA	95.13	2240	109	0	2957	5196	0	3576
DR_012144-RA	DR_000592-RA	92.54	2573	189	1	200	2769	0	3574
DR_012144-RA	DR_000592-RA	96.3	81	3	0	66	146	2e-31	137
DR_012144-RA	DR_000592-RA	91.94	62	5	0	1	62	2e-15	83.8
DR_012143-RA	DR_000592-RA	96.56	1860	64	0	243	2102	0	3180
DR_012143-RA	DR_000592-RA	95.91	1027	42	0	2196	3222	0	1703
DR_012143-RA	DR_000592-RA	97.18	142	4	0	102	243	6e-66	250
DR_012143-RA	DR_000592-RA	97.12	104	3	0	1	104	1e-45	182
DR_013489-RA	DR_009292-RA	93.89	2880	176	0	1	2880	0	4314
DR_012327-RA	DR_003197-RA	93.36	1401	93	0	181	1581	0	2040
DR_012327-RA	DR_003197-RA	95.04	121	6	0	1	121	6e-49	192
DR_011951-RA	DR_003244-RA	93.51	924	60	0	1	924	0	1356
DR_011947-RA	DR_003248-RA	94.99	1197	56	1	23	1215	0	1895
DR_011949-RA	DR_003246-RA	95.31	4434	208	0	247	4680	0	7140
DR_011949-RA	DR_003246-RA	94.74	57	3	0	13	69	2e-17	89.7
DR_013598-RA	DR_012217-RA	91.99	612	48	1	1	611	0	817
DR_006018-RA	DR_003418-RA	92	1788	134	2	1	1782	0	2409
DR_006027-RA	DR_003409-RA	95.29	1911	90	0	1	1911	0	3075
DR_006004-RA	DR_003432-RA	93.74	847	53	0	121	967	0	1259
DR_006004-RA	DR_003432-RA	89.26	121	13	0	1	121	5e-32	137
DR_006030-RA	DR_003406-RA	95.51	2448	110	0	1	2448	0	3981
DR_006046-RA	DR_003390-RA	95.01	921	46	0	1	921	0	1461
DR_006060-RA	DR_003376-RA	95.42	1244	57	0	1	1244	0	2014
DR_006037-RA	DR_003397-RA	94.47	199	11	0	1	199	4e-84	307
DR_006037-RA	DR_003397-RA	93.6	172	11	0	284	455	6e-68	254
DR_006095-RA	DR_003342-RA	93.39	2405	148	7	1	2397	0	3459
DR_006061-RA	DR_003375-RA	95.7	5116	220	0	1	5116	0	8397
DR_006076-RA	DR_003360-RA	93.9	3948	238	1	1	3948	0	5911
DR_006092-RA	DR_003345-RA	95.88	1019	42	0	1	1019	0	1687
DR_006086-RA	DR_003350-RA	95.98	1866	75	0	1	1866	0	3104
DR_006065-RA	DR_003371-RA	94.75	838	44	0	46	883	0	1312
DR_006072-RA	DR_003364-RA	95.64	1538	67	0	3	1540	0	2518
DR_006085-RA	DR_003351-RA	95.39	3360	154	1	1	3360	0	5424
DR_006088-RA	DR_003348-RA	96.55	3160	109	0	315	3474	0	5400
DR_006088-RA	DR_003348-RA	95.57	203	9	0	14	216	2e-90	331
DR_006094-RA	DR_003343-RA	93.82	1457	90	0	1	1457	0	2175
DR_012991-RA	DR_003995-RA	92.13	1614	127	0	1058	2671	0	2192
DR_012991-RA	DR_003995-RA	92.83	1060	76	0	1	1060	0	1499
DR_013648-RA	DR_013409-RA	92.58	633	47	0	1	633	0	882
DR_013441-RA	DR_010917-RA	95.28	551	26	0	1	551	0	886
DR_012818-RA	DR_010937-RA	95.48	1857	84	0	1	1857	0	3015
DR_012816-RA	DR_013181-RA	93.84	2451	151	0	193	2643	0	3661
DR_013286-RA	DR_011275-RA	93.78	466	27	2	1	465	0	678
DR_010449-RA	DR_010501-RA	89.82	1100	99	3	3	1096	0	1289
DR_010433-RA	DR_010484-RA	94.17	1166	67	1	71	1235	0	1764
DR_010448-RA	DR_010500-RA	95.17	2528	122	0	1099	3626	0	4044
DR_010448-RA	DR_010500-RA	94.71	869	46	0	83	951	0	1358
DR_010459-RA	DR_010511-RA	92.7	1220	69	7	1	1210	0	1683
DR_010444-RA	DR_010496-RA	91.56	1078	91	0	907	1984	0	1415
DR_010444-RA	DR_010496-RA	89.73	828	85	0	1	828	0	967
DR_010454-RA	DR_010506-RA	94.83	1452	75	0	1	1452	0	2284
DR_010453-RA	DR_010505-RA	92.21	1091	81	2	11	1098	0	1477
DR_009957-RA	DR_003124-RA	95.34	1245	55	1	1	1242	0	2004
DR_009959-RA	DR_003122-RA	95.05	2304	114	0	1	2304	0	3663
DR_009961-RA	DR_003120-RA	96.71	1214	40	0	1	1214	0	2089
DR_009953-RA	DR_003128-RA	93.2	3105	211	0	1	3105	0	4482
DR_009916-RA	DR_003168-RA	95.02	1968	95	1	1	1965	0	3120
DR_009950-RA	DR_003131-RA	95.07	831	32	1	1	831	0	1330
DR_009958-RA	DR_003123-RA	94.8	711	37	0	1	711	0	1116
DR_009939-RA	DR_003144-RA	94.88	723	37	0	1	723	0	1140
DR_012348-RA	DR_009482-RA	94.63	3294	177	0	469	3762	0	5126
DR_012348-RA	DR_009482-RA	93.9	459	28	0	1	459	0	688
DR_012353-RA	DR_009477-RA	94.95	732	35	1	18	749	0	1152
DR_003632-RA	DR_011194-RA	96.02	1282	51	0	1	1282	0	2137
DR_003653-RA	DR_012523-RA	93.61	1425	91	0	1	1425	0	2103
DR_003658-RA	DR_012527-RA	96.22	978	37	0	1	978	0	1645
DR_003663-RA	DR_012532-RA	94.57	1179	61	1	199	1374	0	1826
DR_003694-RA	DR_009135-RA	94.48	1976	108	1	251	2226	0	3045
DR_003694-RA	DR_009135-RA	96.37	248	9	0	1	248	2e-117	420
DR_003679-RA	DR_009147-RA	95.9	2122	87	0	591	2712	0	3517
DR_003679-RA	DR_009147-RA	95.09	591	29	0	1	591	0	942
DR_003682-RA	DR_009144-RA	95.91	2980	122	0	1	2980	0	4940
DR_003690-RA	DR_009139-RA	95.5	933	42	0	1	933	0	1516
DR_003672-RA	DR_009155-RA	89.09	2484	271	0	475	2958	0	2775
DR_003672-RA	DR_009155-RA	86.62	284	38	0	191	474	2e-69	262
DR_003672-RA	DR_009155-RA	94.9	157	8	0	21	177	2e-65	248
DR_003681-RA	DR_009145-RA	94.22	778	42	1	1	778	0	1181
DR_003715-RA	DR_003987-RA	90.37	2211	213	0	176	2386	0	2694
DR_003715-RA	DR_003987-RA	93.24	148	10	0	2	149	3e-55	214
DR_003699-RA	DR_010011-RA	94.85	4819	248	0	151	4969	0	7586
DR_003699-RA	DR_010011-RA	98.2	111	2	0	4970	5080	5e-52	204
DR_003699-RA	DR_010011-RA	97.98	99	2	0	5092	5190	8e-45	180
DR_003713-RA	DR_013377-RA	91.57	1281	98	6	1	1276	0	1643
DR_003718-RA	DR_003990-RA	97.67	557	13	0	375	931	0	1001
DR_003718-RA	DR_003990-RA	95.71	326	14	0	1	326	2e-152	535
DR_003697-RA	DR_010013-RA	96	2549	101	1	1207	3755	0	4236
DR_003697-RA	DR_010013-RA	94.03	1155	68	1	1	1154	0	1735
DR_003455-RA	DR_007438-RA	95.48	2811	127	0	253	3063	0	4565
DR_003455-RA	DR_007438-RA	83.56	225	36	1	4	227	3e-34	145
DR_003450-RA	DR_007433-RA	94.54	5533	296	2	157	5689	0	8566
DR_003450-RA	DR_007433-RA	91.08	157	14	0	1	157	9e-51	200
DR_003449-RA	DR_007432-RA	95.04	1169	58	0	1	1169	0	1857
DR_003467-RA	DR_011845-RA	95.93	786	32	0	247	1032	0	1304
DR_003467-RA	DR_011845-RA	100	90	0	0	103	192	6e-45	178
DR_003482-RA	DR_011830-RA	93.92	1251	73	1	1	1248	0	1873
DR_003479-RA	DR_011833-RA	95.99	7601	305	0	8	7608	0	12650
DR_003483-RA	DR_011829-RA	94.81	2061	103	2	1	2061	0	3225
DR_003483-RA	DR_011829-RA	96.8	845	23	2	2060	2901	0	1449
DR_003528-RA	DR_005528-RA	94.3	1122	61	1	172	1290	0	1713
DR_003528-RA	DR_005528-RA	92.86	168	12	0	1	168	1e-62	238
DR_003505-RA	DR_005551-RA	94.63	3275	170	2	15	3283	0	5089
DR_003517-RA	DR_005538-RA	93.41	1881	118	1	1275	3155	0	2748
DR_003517-RA	DR_005538-RA	95.96	1237	50	0	1	1237	0	2056
DR_013715-RA	DR_001233-RA	94.42	735	41	0	1	735	0	1132
DR_007628-RA	DR_002840-RA	93.2	647	44	0	1	647	0	934
DR_007635-RA	DR_010469-RA	92.75	579	36	1	387	965	0	817
DR_007635-RA	DR_010469-RA	90.57	244	23	0	76	319	6e-82	301
DR_007630-RA	DR_002838-RA	94.1	2576	152	0	1	2576	0	3901
DR_007623-RA	DR_002844-RA	94.8	903	43	2	1	902	0	1405
DR_007632-RA	DR_002837-RA	94.27	1484	85	0	25	1508	0	2268
DR_007632-RA	DR_002837-RA	95.08	264	13	0	1508	1771	2e-117	420
DR_007632-RA	DR_002837-RA	91.67	60	5	0	1751	1810	8e-15	79.8
DR_007627-RA	DR_002841-RA	94.96	1151	58	0	1016	2166	0	1822
DR_007627-RA	DR_002841-RA	94.51	966	53	0	1	966	0	1495
DR_010567-RA	DR_000766-RA	93.35	5307	350	1	1	5304	0	7717
DR_010579-RA	DR_000754-RA	95.66	2189	95	0	23	2211	0	3586
DR_010564-RA	DR_000770-RA	93.81	1664	100	1	1	1664	0	2478
DR_010564-RA	DR_000770-RA	92.77	429	31	0	2218	2646	8e-173	605
DR_010564-RA	DR_000770-RA	92.94	170	9	1	2036	2202	2e-62	238
DR_010572-RA	DR_000761-RA	96.92	616	19	0	1	616	0	1070
DR_005212-RA	DR_006331-RA	87.93	920	98	5	1	910	0	920
DR_005215-RA	DR_006328-RA	93.19	675	40	2	1	675	0	965
DR_005224-RA	DR_006318-RA	95.69	627	27	0	1	627	0	1029
DR_005233-RA	DR_006310-RA	94	3585	209	2	1	3582	0	5394
DR_005233-RA	DR_006310-RA	93.09	579	40	0	3594	4172	0	831
DR_005237-RA	DR_006306-RA	93.83	1912	118	0	1	1912	0	2855
DR_005243-RA	DR_011599-RA	93.73	2344	145	2	1	2344	0	3465
DR_005242-RA	DR_011598-RA	95.01	921	45	1	1	921	0	1453
DR_005242-RA	DR_011598-RA	87.07	116	15	0	963	1078	1e-24	111
DR_005222-RA	DR_006320-RA	95.64	2845	124	0	303	3147	0	4657
DR_005222-RA	DR_006320-RA	96.03	302	12	0	1	302	3e-142	504
DR_005234-RA	DR_006309-RA	95.8	1594	67	0	12	1605	0	2629
DR_005267-RA	DR_011625-RA	92.63	882	65	0	1	882	0	1233
DR_005279-RA	DR_011637-RA	93.53	2025	131	0	13	2037	0	2976
DR_005258-RA	DR_011615-RA	95.59	1246	54	1	625	1870	0	2026
DR_005258-RA	DR_011615-RA	94.64	616	33	0	2351	2966	0	959
DR_005258-RA	DR_011615-RA	94.76	401	21	0	76	476	6e-180	628
DR_005258-RA	DR_011615-RA	97.09	309	9	0	1999	2307	1e-153	541
DR_005255-RA	DR_011612-RA	93.3	552	34	1	1	552	0	797
DR_005284-RA	DR_012767-RA	93.49	1521	99	0	40	1560	0	2230
DR_005247-RA	DR_011603-RA	94.64	1680	90	0	18	1697	0	2617
DR_005278-RA	DR_011636-RA	93.15	1051	72	0	1	1051	0	1513
DR_005285-RA	DR_012766-RA	91.43	1178	99	1	97	1274	0	1528
DR_005266-RA	DR_011624-RA	96.44	450	16	0	1	450	0	765
DR_012713-RA	DR_013060-RA	95.53	2171	97	0	19	2189	0	3535
DR_012715-RA	DR_013062-RA	90.23	522	51	0	1	522	0	630
DR_010806-RA	DR_008875-RA	92.34	1737	133	0	1	1737	0	2389
DR_010810-RA	DR_008871-RA	91.67	1128	94	0	1	1128	0	1491
DR_010810-RA	DR_008871-RA	91.11	664	59	0	1128	1791	0	848
DR_012266-RA	DR_012423-RA	95.54	1300	58	0	2	1301	0	2117
DR_012265-RA	DR_012424-RA	92.53	964	72	0	8	971	0	1340
DR_012265-RA	DR_012424-RA	90.78	282	26	0	973	1254	3e-97	353
DR_007283-RA	DR_008275-RA	94.81	1118	57	1	12	1128	0	1748
DR_007291-RA	DR_012450-RA	94.1	3391	200	0	1	3391	0	5136
DR_007290-RA	DR_012451-RA	94.82	3013	153	1	2807	5819	0	4732
DR_007290-RA	DR_012451-RA	95.56	1982	88	0	648	2629	0	3231
DR_007290-RA	DR_012451-RA	95.59	454	20	0	148	601	0	741
DR_007290-RA	DR_012451-RA	96.08	102	4	0	1	102	8e-42	170
DR_007282-RA	DR_008276-RA	94.65	2129	114	0	5	2133	0	3316
DR_007338-RA	DR_010664-RA	94.39	1497	78	1	1	1497	0	2303
DR_007303-RA	DR_012437-RA	94.72	3711	190	1	1	3711	0	5804
DR_007321-RA	DR_010647-RA	94.55	1155	62	1	1	1155	0	1782
DR_007312-RA	DR_010639-RA	94.32	1268	72	0	334	1601	0	1943
DR_007312-RA	DR_010639-RA	96.35	329	12	0	5	333	1e-158	557
DR_007298-RA	DR_012442-RA	93.07	3162	210	2	1	3162	0	4530
DR_007325-RA	DR_010651-RA	93.67	743	47	0	7	749	0	1100
DR_007311-RA	DR_010638-RA	94.02	1471	88	0	1	1471	0	2218
DR_007337-RA	DR_010663-RA	94.36	1561	88	0	1	1561	0	2397
DR_007323-RA	DR_010649-RA	95.16	764	37	0	1	764	0	1221
DR_007323-RA	DR_010649-RA	93.49	292	19	0	765	1056	4e-120	428
DR_010797-RA	DR_005498-RA	94.99	1738	84	1	140	1877	0	2752
DR_010797-RA	DR_005498-RA	91.67	108	9	0	27	134	6e-34	143
DR_010772-RA	DR_007076-RA	90.3	711	66	1	5	712	0	858
DR_010784-RA	DR_005511-RA	96.72	1768	58	0	1	1768	0	3045
DR_010782-RA	DR_005513-RA	93.9	852	52	0	5	856	0	1277
DR_010795-RA	DR_005500-RA	96.77	651	21	0	89	739	0	1124
DR_010775-RA	DR_005522-RA	94.69	2261	120	0	1	2261	0	3531
DR_010789-RA	DR_005506-RA	92.37	1323	101	0	24	1346	0	1822
DR_010796-RA	DR_005499-RA	92.09	834	62	1	2	831	0	1128
DR_010615-RA	DR_010247-RA	93.91	2528	141	3	52	2576	0	3786
DR_010615-RA	DR_010616-RA	100	219	0	0	2358	2576	2e-121	434
DR_010615-RA	DR_010248-RA	97.26	219	6	0	2358	2576	3e-107	387
DR_010619-RA	DR_010251-RA	95.51	802	36	0	1	802	0	1304
DR_010619-RA	DR_010251-RA	95.86	266	11	0	806	1071	1e-123	440
DR_010619-RA	DR_010251-RA	95.52	67	3	0	1086	1152	5e-24	109
DR_010592-RA	DR_010222-RA	96.1	1512	59	0	1	1512	0	2529
DR_010627-RA	DR_010260-RA	95.56	4303	185	1	1	4297	0	7018
DR_010616-RA	DR_010248-RA	95.63	664	28	1	5	668	0	1078
DR_010616-RA	DR_010615-RA	100	219	0	0	450	668	4e-122	434
DR_010616-RA	DR_010247-RA	97.26	219	6	0	450	668	9e-108	387
DR_010626-RA	DR_010259-RA	94.1	3239	191	0	1	3239	0	4906
DR_010618-RA	DR_010250-RA	90.97	930	73	4	3	928	0	1160
DR_010622-RA	DR_010254-RA	95.11	1023	50	0	1	1023	0	1631
DR_010606-RA	DR_010236-RA	94.63	1154	62	0	1	1154	0	1796
DR_010606-RA	DR_010236-RA	95.36	194	9	0	1156	1349	2e-85	313
DR_013231-RA	DR_005332-RA	94.22	2749	154	2	1	2749	0	4179
DR_000443-RA	DR_009226-RA	94.86	2025	104	0	1	2025	0	3190
DR_000465-RA	DR_011120-RA	95.26	1792	85	0	1	1792	0	2878
DR_000454-RA	DR_009216-RA	93.63	1099	70	0	1	1099	0	1624
DR_000484-RA	DR_011168-RA	92.49	1291	91	1	1	1285	0	1792
DR_000472-RA	DR_011114-RA	95.22	2219	106	0	1	2219	0	3558
DR_000472-RA	DR_011114-RA	93.81	1114	66	1	2225	3335	0	1657
DR_000472-RA	DR_011114-RA	96.55	261	9	0	3760	4020	7e-125	446
DR_000472-RA	DR_011114-RA	92.5	200	15	0	3561	3760	4e-74	278
DR_000472-RA	DR_011114-RA	85.86	99	14	0	4106	4204	3e-16	85.7
DR_000471-RA	DR_011115-RA	94.75	3161	166	0	36	3196	0	4950
DR_000483-RA	DR_011167-RA	92.01	1965	157	0	2	1966	0	2650
DR_000496-RA	DR_012873-RA	94.52	7190	394	0	1	7190	0	11130
DR_000496-RA	DR_012873-RA	94.23	52	3	0	7195	7246	3e-14	79.8
DR_000503-RA	DR_012866-RA	94.73	1842	94	1	1	1842	0	2878
DR_000514-RA	DR_013709-RA	95.31	704	33	0	1	704	0	1134
DR_000514-RA	DR_013709-RA	95.63	503	22	0	774	1276	0	823
DR_000521-RA	DR_005175-RA	94.65	990	53	0	220	1209	0	1542
DR_000521-RA	DR_005175-RA	94.74	171	9	0	1	171	1e-71	268
DR_000542-RA	DR_005152-RA	96.11	1825	70	1	1	1825	0	3047
DR_000555-RA	DR_005139-RA	94.55	1834	97	1	1	1831	0	2839
DR_000567-RA	DR_005127-RA	93.65	2960	188	0	2422	5381	0	4377
DR_000567-RA	DR_005127-RA	95.11	2679	131	0	5457	8135	0	4272
DR_000567-RA	DR_005127-RA	94.59	943	51	0	1294	2236	0	1465
DR_000567-RA	DR_005127-RA	97.5	680	17	0	1	680	0	1213
DR_000567-RA	DR_005127-RA	94.29	473	24	1	719	1188	0	720
DR_000567-RA	DR_005127-RA	96.36	55	1	1	5383	5436	5e-16	85.7
DR_000572-RA	DR_005123-RA	95.83	2853	119	0	3	2855	0	4712
DR_000566-RA	DR_005128-RA	96.22	4551	172	0	103	4653	0	7658
DR_000593-RA	DR_012145-RA	94.41	1412	79	0	1	1412	0	2173
DR_000587-RA	DR_012138-RA	92.79	3329	240	0	1148	4476	0	4696
DR_000587-RA	DR_012138-RA	93.54	1084	67	1	1	1081	0	1590
DR_000582-RA	DR_005111-RA	92.32	807	62	0	1306	2112	0	1108
DR_000582-RA	DR_005111-RA	92.09	657	52	0	27	683	0	890
DR_000582-RA	DR_005111-RA	95.06	263	13	0	818	1080	8e-117	418
DR_000608-RA	DR_013453-RA	95.84	2237	93	0	1	2237	0	3697
DR_000596-RA	DR_012148-RA	93.79	2221	126	6	1	2211	0	3273
DR_000597-RA	DR_012149-RA	95.49	1642	74	0	1	1642	0	2668
DR_000612-RA	DR_013449-RA	93.69	1774	109	1	1	1774	0	2625
DR_000592-RA	DR_012144-RA	94.53	2853	156	0	5222	8074	0	4419
DR_000592-RA	DR_012144-RA	95.13	2240	109	0	2806	5045	0	3576
DR_000592-RA	DR_012144-RA	92.54	2573	189	1	235	2807	0	3574
DR_000592-RA	DR_012144-RA	96.3	81	3	0	155	235	2e-31	137
DR_000592-RA	DR_012144-RA	91.94	62	5	0	46	107	3e-15	83.8
DR_000592-RA	DR_012143-RA	96.56	1860	64	0	8568	10427	0	3180
DR_000592-RA	DR_012143-RA	95.91	1027	42	0	10428	11454	0	1703
DR_000592-RA	DR_012143-RA	97.18	142	4	0	8332	8473	2e-65	250
DR_000592-RA	DR_012143-RA	97.12	104	3	0	8201	8304	4e-45	182
DR_000590-RA	DR_012141-RA	95.8	381	16	0	1	381	0	628
DR_000590-RA	DR_012141-RA	97.5	40	1	0	381	420	4e-13	71.9
DR_004448-RA	DR_009840-RA	94.99	1997	100	0	5	2001	0	3166
DR_004446-RA	DR_009842-RA	94.6	426	23	0	429	854	0	662
DR_004446-RA	DR_009842-RA	88.96	317	29	2	1	317	1e-94	343
DR_004446-RA	DR_009842-RA	94.44	90	5	0	661	750	4e-33	139
DR_004446-RA	DR_009842-RA	97.83	46	1	0	776	821	2e-16	83.8
DR_004446-RA	DR_009842-RA	97.62	42	1	0	324	365	5e-14	75.8
DR_004442-RA	DR_007162-RA	93.9	672	35	1	1	672	0	1009
DR_004436-RA	DR_007156-RA	92.54	1943	139	1	1	1937	0	2704
DR_004441-RA	DR_007161-RA	91.01	434	31	2	1	434	3e-156	547
DR_004484-RA	DR_000632-RA	94.5	2435	124	6	1	2430	0	3725
DR_004465-RA	DR_009822-RA	92.89	1659	115	1	1	1659	0	2349
DR_004470-RA	DR_009817-RA	95.58	1650	69	3	15	1662	0	2670
DR_004485-RA	DR_000633-RA	95.03	1990	96	1	1	1987	0	3156
DR_004485-RA	DR_000633-RA	96.29	377	14	0	1996	2372	0	636
DR_004467-RA	DR_009820-RA	94	2800	168	0	9	2808	0	4218
DR_004463-RA	DR_009824-RA	95.79	1165	49	0	1	1165	0	1921
DR_004520-RA	DR_000668-RA	95.74	1739	74	0	252	1990	0	2861
DR_004520-RA	DR_000668-RA	98	50	1	0	1988	2037	2e-18	91.7
DR_004523-RA	DR_000671-RA	94.17	1030	54	1	1	1030	0	1568
DR_004544-RA	DR_000694-RA	94.2	2429	140	1	298	2725	0	3689
DR_004544-RA	DR_000694-RA	95.08	183	9	0	117	299	2e-78	291
DR_004501-RA	DR_000648-RA	94.63	726	39	0	1	726	0	1130
DR_004505-RA	DR_000652-RA	96.44	703	25	0	1	703	0	1195
DR_004505-RA	DR_000652-RA	91.61	143	5	1	714	849	3e-49	192
DR_004530-RA	DR_000679-RA	95.52	1116	50	0	1	1116	0	1816
DR_004488-RA	DR_000636-RA	95.66	3133	136	0	18	3150	0	5132
DR_004543-RA	DR_000693-RA	93.11	1466	101	0	1	1466	0	2105
DR_004503-RA	DR_000650-RA	96.67	2880	96	0	1	2880	0	4948
DR_004539-RA	DR_000689-RA	96	1374	55	0	1	1374	0	2288
DR_004516-RA	DR_000664-RA	94	483	28	1	151	633	0	720
DR_004517-RA	DR_000665-RA	95.31	639	30	0	1	639	0	1029
DR_012451-RA	DR_007290-RA	94.82	3013	153	1	2549	5558	0	4732
DR_012451-RA	DR_007290-RA	95.56	1982	88	0	567	2548	0	3231
DR_012451-RA	DR_007290-RA	95.59	454	20	0	115	568	0	741
DR_012451-RA	DR_007290-RA	96.08	102	4	0	13	114	8e-42	170
DR_012437-RA	DR_007303-RA	94.72	3711	190	1	1	3705	0	5804
DR_012442-RA	DR_007298-RA	93.07	3162	210	2	1	3153	0	4530
DR_012450-RA	DR_007291-RA	94.1	3391	200	0	1	3391	0	5136
DR_006446-RA	DR_003828-RA	95.69	813	35	0	18	830	0	1334
DR_006467-RA	DR_013496-RA	95.41	6771	311	0	1	6771	0	10960
DR_006467-RA	DR_013496-RA	92.77	857	53	1	6772	7628	0	1215
DR_006471-RA	DR_010312-RA	93.64	2658	163	1	15	2672	0	3931
DR_006471-RA	DR_010312-RA	97.67	43	1	0	2670	2712	4e-14	77.8
DR_013306-RA	DR_010761-RA	92.46	1353	102	0	17	1369	0	1873
DR_007786-RA	DR_001103-RA	92.23	3050	231	2	1	3050	0	4159
DR_007787-RA	DR_001102-RA	93.97	1394	84	0	38	1431	0	2097
DR_007772-RA	DR_001117-RA	94.95	555	28	0	1	555	0	878
DR_007825-RA	DR_001066-RA	94.5	1747	96	0	1	1747	0	2702
DR_007800-RA	DR_001089-RA	95.89	2263	93	0	618	2880	0	3749
DR_007800-RA	DR_001089-RA	95.66	530	23	0	92	621	0	868
DR_007794-RA	DR_001095-RA	91.47	1677	143	0	307	1983	0	2190
DR_007814-RA	DR_001076-RA	93.71	842	51	2	100	940	0	1233
DR_007811-RA	DR_001079-RA	94.22	2646	153	0	1	2646	0	4032
DR_007823-RA	DR_001068-RA	94.23	5352	309	0	1	5352	0	8159
DR_007805-RA	DR_001084-RA	96.04	2097	83	0	1	2097	0	3499
DR_007796-RA	DR_001093-RA	94.16	1078	60	1	64	1138	0	1633
DR_007802-RA	DR_001087-RA	95	2600	130	0	5	2604	0	4123
DR_007799-RA	DR_001090-RA	96.57	700	24	0	16	715	0	1197
DR_007799-RA	DR_001090-RA	91.39	488	42	0	778	1265	0	634
DR_013466-RA	DR_009264-RA	95.89	1047	43	0	1	1047	0	1735
DR_013466-RA	DR_009264-RA	100	34	0	0	1220	1253	2e-11	67.9
DR_011275-RA	DR_013286-RA	93.78	466	27	2	1	465	0	678
DR_011763-RA	DR_001793-RA	94.1	3545	203	1	1	3545	0	5372
DR_011763-RA	DR_001793-RA	91.24	354	31	0	3688	4041	7e-128	456
DR_011763-RA	DR_001793-RA	90.91	143	13	0	3549	3691	6e-45	180
DR_013077-RA	DR_006539-RA	95.12	1597	72	1	10	1600	0	2549
DR_002793-RA	DR_009250-RA	93.88	654	40	0	1	654	0	979
DR_002788-RA	DR_009244-RA	96.25	933	34	1	43	974	0	1564
DR_002794-RA	DR_009251-RA	96.81	1632	52	0	1	1632	0	2823
DR_002786-RA	DR_009242-RA	95.24	441	21	0	1	441	0	708
DR_002837-RA	DR_007632-RA	94.27	1484	85	0	19	1502	0	2268
DR_002837-RA	DR_007632-RA	95.08	264	13	0	1652	1915	2e-117	420
DR_002837-RA	DR_007632-RA	91.67	60	5	0	1931	1990	8e-15	79.8
DR_002841-RA	DR_007627-RA	94.96	1151	58	0	974	2124	0	1822
DR_002841-RA	DR_007627-RA	94.51	966	53	0	1	966	0	1495
DR_002840-RA	DR_007628-RA	93.2	647	44	0	1	647	0	934
DR_002838-RA	DR_007630-RA	94.1	2576	152	0	1	2576	0	3901
DR_002844-RA	DR_007623-RA	94.8	903	43	2	1	900	0	1405
DR_002872-RA	DR_005903-RA	94.94	968	49	0	1	968	0	1530
DR_002876-RA	DR_005899-RA	95.67	1017	44	0	16	1032	0	1667
DR_002878-RA	DR_005898-RA	95.95	5803	235	0	1	5803	0	9640
DR_002878-RA	DR_005898-RA	100	34	0	0	5811	5844	9e-11	67.9
DR_002875-RA	DR_005900-RA	93.65	1952	124	0	1475	3426	0	2886
DR_002875-RA	DR_005900-RA	93.99	1464	82	1	3	1460	0	2206
DR_002859-RA	DR_005915-RA	94.98	2170	109	0	1	2170	0	3437
DR_002873-RA	DR_005902-RA	94.79	902	47	0	1	902	0	1415
DR_012551-RA	DR_010929-RA	95.22	3601	172	0	1	3601	0	5775
DR_012555-RA	DR_010926-RA	95.67	2793	118	1	1	2793	0	4573
DR_012550-RA	DR_002367-RA	94.63	2103	113	0	130	2232	0	3273
DR_012808-RA	DR_010522-RA	95.62	1233	54	0	17	1249	0	2016
DR_012808-RA	DR_010522-RA	94.86	584	30	0	1288	1871	0	920
DR_007897-RA	DR_008843-RA	93.44	930	61	0	1	930	0	1360
DR_007891-RA	DR_010881-RA	93.77	1317	82	0	1	1317	0	1961
DR_007885-RA	DR_010875-RA	92.93	1840	114	5	1	1832	0	2599
DR_007884-RA	DR_010874-RA	97.08	2227	65	0	343	2569	0	3899
DR_007884-RA	DR_010874-RA	96.63	624	21	0	2845	3468	0	1070
DR_007884-RA	DR_010874-RA	96.63	89	3	0	2604	2692	1e-36	153
DR_007904-RA	DR_008837-RA	96.95	394	12	0	1	394	0	686
DR_007904-RA	DR_008837-RA	94.39	196	11	0	394	589	3e-82	301
DR_007896-RA	DR_008844-RA	95.54	673	30	0	6	678	0	1096
DR_007898-RA	DR_008842-RA	95.93	615	25	0	1	615	0	1021
DR_007955-RA	DR_008788-RA	94.23	3850	217	3	1	3845	0	5852
DR_007910-RA	DR_008831-RA	97.05	474	14	0	1	474	0	829
DR_007944-RA	DR_008798-RA	95.17	746	36	0	44	789	0	1193
DR_007913-RA	DR_008828-RA	95.21	1691	81	0	58	1748	0	2710
DR_007909-RA	DR_008832-RA	94.37	871	49	0	247	1117	0	1338
DR_007909-RA	DR_008832-RA	93.87	310	19	0	1147	1456	1e-130	464
DR_007909-RA	DR_008832-RA	93.88	49	3	0	4	52	4e-13	73.8
DR_007909-RA	DR_008832-RA	91.84	49	4	0	103	151	9e-11	65.9
DR_007952-RA	DR_008791-RA	93.96	331	18	2	94	423	2e-136	482
DR_007952-RA	DR_008791-RA	89.58	144	15	0	455	598	1e-41	167
DR_007952-RA	DR_008791-RA	95.74	47	2	0	49	95	1e-14	77.8
DR_004637-RA	DR_000003-RA	95.07	1135	56	0	5	1139	0	1806
DR_004637-RA	DR_000003-RA	92.22	334	26	0	1147	1480	3e-128	456
DR_004625-RA	DR_003803-RA	95.05	1716	85	0	973	2688	0	2728
DR_004625-RA	DR_003803-RA	96.2	973	37	0	1	973	0	1635
DR_004625-RA	DR_003803-RA	94.24	191	11	0	2684	2874	2e-78	291
DR_004630-RA	DR_013624-RA	94.68	1222	65	0	81	1302	0	1907
DR_004654-RA	DR_000023-RA	95.91	2200	90	0	1	2200	0	3648
DR_004644-RA	DR_000010-RA	93.12	858	59	0	31	888	0	1233
DR_004678-RA	DR_000048-RA	93.53	1392	88	2	1	1392	0	2030
DR_004678-RA	DR_000048-RA	95.28	106	5	0	1405	1510	2e-42	170
DR_004664-RA	DR_000033-RA	93.27	1233	72	6	1	1224	0	1748
DR_004712-RA	DR_000080-RA	96.23	1751	66	0	1	1751	0	2948
DR_004691-RA	DR_000061-RA	95.83	1487	62	0	1	1487	0	2456
DR_004697-RA	DR_000066-RA	94.61	2280	120	1	1	2280	0	3540
DR_004690-RA	DR_000060-RA	95.42	3252	149	0	361	3612	0	5265
DR_004690-RA	DR_000060-RA	95.49	244	11	0	1	244	5e-110	396
DR_004695-RA	DR_000064-RA	94.53	987	54	0	1	987	0	1528
DR_004699-RA	DR_000068-RA	94.93	1677	85	0	1	1677	0	2650
DR_004707-RA	DR_000076-RA	92.08	2752	196	9	682	3429	0	3681
DR_004707-RA	DR_000076-RA	95.18	456	22	0	1	456	0	729
DR_004670-RA	DR_000039-RA	95.89	681	28	0	22	702	0	1128
DR_004670-RA	DR_000039-RA	94.14	665	39	0	704	1368	0	1009
DR_008276-RA	DR_007282-RA	94.65	2129	114	0	23	2151	0	3316
DR_008279-RA	DR_013519-RA	95.36	2112	95	1	1	2112	0	3406
DR_008281-RA	DR_013517-RA	96.37	579	21	0	1	579	0	981
DR_008275-RA	DR_007283-RA	94.81	1118	57	1	11	1128	0	1748
DR_008285-RA	DR_012364-RA	95.72	2573	110	0	3562	6134	0	4228
DR_008295-RA	DR_012375-RA	94.14	1947	108	1	1	1947	0	2958
DR_008315-RA	DR_011293-RA	92.2	808	63	0	22	829	0	1102
DR_008313-RA	DR_011291-RA	93.5	692	45	0	5	696	0	1015
DR_008310-RA	DR_011289-RA	96.65	358	12	0	158	515	2e-176	615
DR_008310-RA	DR_011289-RA	96.09	128	5	0	1	128	7e-56	214
DR_008310-RA	DR_011289-RA	91.49	141	12	0	520	660	6e-47	184
DR_008321-RA	DR_011299-RA	90.7	935	87	0	23	957	0	1164
DR_008168-RA	DR_006648-RA	96.79	655	21	0	96	750	0	1132
DR_008168-RA	DR_006648-RA	90.7	86	8	0	1	86	1e-23	107
DR_008159-RA	DR_008780-RA	96.34	2843	104	0	1	2843	0	4811
DR_008173-RA	DR_006653-RA	95.32	2887	135	0	1446	4332	0	4653
DR_008173-RA	DR_006653-RA	95.31	1472	69	0	1	1472	0	2371
DR_008164-RA	DR_006645-RA	92.16	1314	91	4	799	2100	0	1772
DR_008164-RA	DR_006645-RA	92.88	660	47	0	144	803	0	936
DR_008162-RA	DR_006643-RA	96.04	1086	43	0	1	1086	0	1812
DR_008167-RA	DR_006647-RA	95.22	1653	79	0	1	1653	0	2650
DR_008166-RA	DR_006646-RA	93.9	623	38	0	134	756	0	934
DR_008166-RA	DR_006646-RA	97.01	67	2	0	1	67	1e-26	117
DR_008186-RA	DR_006665-RA	94.09	1473	84	1	1	1470	0	2226
DR_008210-RA	DR_006688-RA	96.36	439	16	0	375	813	0	743
DR_008210-RA	DR_006688-RA	95.65	368	16	0	1	368	9e-173	603
DR_008207-RA	DR_006685-RA	93.15	1417	94	2	60	1474	0	2026
DR_008208-RA	DR_006686-RA	95.24	2270	105	1	43	2309	0	3640
DR_008208-RA	DR_006686-RA	92.47	93	7	0	2320	2412	1e-29	129
DR_008208-RA	DR_006686-RA	100	40	0	0	1	40	1e-14	79.8
DR_008189-RA	DR_006668-RA	95.11	1718	84	0	1	1718	0	2740
DR_008189-RA	DR_006668-RA	97.53	81	2	0	1766	1846	2e-34	145
DR_008197-RA	DR_006676-RA	94.4	4569	253	1	1	4569	0	7023
DR_008190-RA	DR_006669-RA	95.57	654	26	1	1	654	0	1063
DR_006499-RA	DR_004579-RA	95.22	1359	59	2	1	1356	0	2171
DR_006491-RA	DR_004586-RA	96.12	773	30	0	500	1272	0	1294
DR_006491-RA	DR_004586-RA	94.02	485	29	0	1	485	0	731
DR_006503-RA	DR_004573-RA	94.23	2790	155	1	88	2877	0	4256
DR_006503-RA	DR_004573-RA	95.12	82	4	0	7	88	4e-30	131
DR_006495-RA	DR_004583-RA	94.54	2124	116	0	9	2132	0	3291
DR_006495-RA	DR_004583-RA	93.38	1073	71	0	2133	3205	0	1564
DR_006511-RA	DR_004564-RA	97.01	735	22	0	1	735	0	1283
DR_006513-RA	DR_004562-RA	93.89	1456	86	1	1	1453	0	2177
DR_006529-RA	DR_004548-RA	96.08	1226	48	0	7	1232	0	2050
DR_006518-RA	DR_004558-RA	95.28	1695	78	2	8	1701	0	2710
DR_006520-RA	DR_004556-RA	95.29	488	23	0	1	488	0	785
DR_006520-RA	DR_004556-RA	97.3	37	1	0	581	617	4e-11	65.9
DR_006552-RA	DR_013358-RA	94.92	472	24	0	1	472	0	745
DR_006552-RA	DR_013358-RA	100	49	0	0	608	656	1e-20	97.6
DR_006514-RA	DR_004561-RA	94.74	2701	133	2	1	2700	0	4226
DR_006510-RA	DR_004565-RA	92.48	2275	166	1	1	2275	0	3154
DR_006510-RA	DR_004565-RA	90.49	536	51	0	2333	2868	0	658
DR_006548-RA	DR_013354-RA	94	2682	152	1	1	2673	0	4048
DR_006528-RA	DR_004549-RA	95.32	1644	77	0	1	1644	0	2648
DR_006539-RA	DR_013077-RA	95.12	1597	72	1	196	1792	0	2549
DR_009065-RA	DR_012012-RA	94.39	2211	118	2	1	2208	0	3392
DR_009078-RA	DR_011998-RA	94.55	1467	80	0	1	1467	0	2274
DR_010761-RA	DR_013306-RA	92.46	1353	102	0	17	1369	0	1873
DR_000232-RA	DR_006375-RA	94.86	915	47	0	1	915	0	1441
DR_000249-RA	DR_006392-RA	93.31	5425	360	1	15	5439	0	7872
DR_000251-RA	DR_006394-RA	94.97	2147	108	0	1	2147	0	3400
DR_000263-RA	DR_006406-RA	92.8	514	37	0	9	522	0	726
DR_000267-RA	DR_006410-RA	94.44	234	13	0	85	318	2e-100	361
DR_000267-RA	DR_006410-RA	95.4	87	4	0	1	87	4e-34	141
DR_000264-RA	DR_006407-RA	93.74	1518	95	0	34	1551	0	2256
DR_000291-RA	DR_013536-RA	96.05	2910	115	0	385	3294	0	4857
DR_000291-RA	DR_013536-RA	92.19	269	21	0	1	269	4e-101	367
DR_000290-RA	DR_013535-RA	95.84	2309	96	0	1	2309	0	3816
DR_000274-RA	DR_006418-RA	93.42	1764	116	0	41	1804	0	2577
DR_000327-RA	DR_002481-RA	96.49	626	22	0	165	790	0	1066
DR_000327-RA	DR_002481-RA	93.9	164	10	0	1	164	2e-65	246
DR_000325-RA	DR_002479-RA	95.27	1439	68	0	779	2217	0	2313
DR_000325-RA	DR_002479-RA	92.1	519	35	2	1	514	0	696
DR_000314-RA	DR_002470-RA	95.18	1659	80	0	1	1659	0	2654
DR_000326-RA	DR_002480-RA	95.71	2286	98	0	1	2286	0	3755
DR_000310-RA	DR_002466-RA	95.68	2016	84	1	1	2013	0	3303
DR_000302-RA	DR_002458-RA	88.7	1168	129	1	569	1733	0	1265
DR_000302-RA	DR_002458-RA	90.76	357	30	1	31	384	4e-124	442
DR_000307-RA	DR_002463-RA	94.78	1436	75	0	726	2161	0	2252
DR_000307-RA	DR_002463-RA	94.1	695	41	0	1	695	0	1053
DR_000342-RA	DR_002496-RA	95.89	1095	45	0	37	1131	0	1814
DR_000330-RA	DR_002484-RA	94.4	1660	93	0	1	1660	0	2553
DR_000336-RA	DR_002490-RA	94.28	2781	156	1	1	2781	0	4248
DR_000341-RA	DR_002495-RA	96.76	432	14	0	97	528	0	745
DR_000361-RA	DR_002516-RA	94.81	6375	328	1	1	6372	0	10010
DR_000363-RA	DR_002518-RA	95.51	3205	144	0	1	3205	0	5212
DR_000365-RA	DR_002520-RA	93.3	880	59	0	7	886	0	1277
DR_000371-RA	DR_002526-RA	95.32	1260	59	0	1	1260	0	2030
DR_000364-RA	DR_002519-RA	95.45	3320	150	1	23	3342	0	5376
DR_000391-RA	DR_002546-RA	94.39	2229	124	1	4	2232	0	3420
DR_000395-RA	DR_002550-RA	91.95	2261	173	2	1	2255	0	3037
DR_000392-RA	DR_002547-RA	92.56	1424	100	1	1	1418	0	1984
DR_000394-RA	DR_002549-RA	92.77	2227	159	2	424	2648	0	3122
DR_000394-RA	DR_002549-RA	95.99	374	15	0	1	374	3e-178	622
DR_000408-RA	DR_002563-RA	93.84	487	30	0	473	959	0	728
DR_000408-RA	DR_002563-RA	93.7	349	22	0	1	349	5e-147	517
DR_000409-RA	DR_002564-RA	93.92	1448	88	0	1	1448	0	2173
DR_000398-RA	DR_002554-RA	97.03	741	22	0	1	741	0	1294
DR_008732-RA	DR_013156-RA	94.74	1730	90	1	1	1730	0	2700
DR_008722-RA	DR_010118-RA	93.74	4614	289	0	1	4614	0	6855
DR_008776-RA	DR_007245-RA	94.48	489	27	0	6	494	0	755
DR_008776-RA	DR_007245-RA	98.81	252	3	0	496	747	1e-134	476
DR_008764-RA	DR_007231-RA	95.69	882	36	1	421	1302	0	1441
DR_008764-RA	DR_007231-RA	97.52	161	4	0	133	293	1e-77	287
DR_008764-RA	DR_007231-RA	100	92	0	0	10	101	5e-46	182
DR_008764-RA	DR_007231-RA	100	48	0	0	343	390	9e-20	95.6
DR_008769-RA	DR_007237-RA	96.3	1703	63	0	1	1703	0	2876
DR_006931-RA	DR_000816-RA	94.08	1520	90	0	1	1520	0	2300
DR_006930-RA	DR_000817-RA	94.26	1220	67	1	833	2049	0	1859
DR_006930-RA	DR_000817-RA	96.17	679	26	0	1	679	0	1140
DR_013134-RA	DR_013090-RA	95.54	3428	147	1	1	3422	0	5584
DR_013568-RA	DR_007182-RA	95.86	1642	65	1	1	1642	0	2712
DR_013568-RA	DR_007182-RA	89.96	508	51	0	1642	2149	3e-172	603
DR_011888-RA	DR_004949-RA	94.26	1062	53	1	8	1061	0	1628
DR_011888-RA	DR_004949-RA	93.61	1017	65	0	1061	2077	0	1501
DR_011886-RA	DR_004950-RA	91.79	1389	114	0	1	1389	0	1850
DR_011971-RA	DR_005017-RA	95.16	910	44	0	284	1193	0	1455
DR_011971-RA	DR_005017-RA	92.34	248	19	0	59	306	8e-94	341
DR_011967-RA	DR_005013-RA	94.83	947	49	0	31	977	0	1489
DR_013106-RA	DR_002426-RA	95.23	1468	69	1	1	1467	0	2347
DR_013693-RA	DR_009491-RA	92.69	1451	105	1	1	1451	0	2028
DR_013689-RA	DR_009487-RA	90.97	2336	202	3	1	2327	0	2946
DR_013688-RA	DR_009486-RA	94.13	1346	79	0	17	1362	0	2042
DR_012597-RA	DR_011681-RA	95.44	548	25	0	1	548	0	888
DR_012606-RA	DR_011690-RA	95.77	780	33	0	1	780	0	1285
DR_012586-RA	DR_011670-RA	93.2	1162	71	2	40	1195	0	1673
DR_012586-RA	DR_012587-RA	100	139	0	0	1057	1195	4e-74	276
DR_012592-RA	DR_011676-RA	94.69	1356	72	0	47	1402	0	2117
DR_012604-RA	DR_011688-RA	96.4	1195	43	0	169	1363	0	2028
DR_012604-RA	DR_011688-RA	90.63	128	12	0	1	128	8e-39	159
DR_012585-RA	DR_011669-RA	93.66	3171	189	4	1	3165	0	4676
DR_012598-RA	DR_011682-RA	96.08	4010	157	0	1	4010	0	6704
DR_012600-RA	DR_011684-RA	96.43	1371	49	0	408	1778	0	2329
DR_012600-RA	DR_011684-RA	96.86	733	23	0	1917	2649	0	1271
DR_012600-RA	DR_011684-RA	95.74	352	15	0	1	352	4e-165	579
DR_012587-RA	DR_012586-RA	100	139	0	0	515	653	2e-74	276
DR_012587-RA	DR_011670-RA	93.7	127	8	0	515	641	4e-48	188
DR_012605-RA	DR_011689-RA	95.67	646	28	0	1	646	0	1059
DR_013770-RA	DR_009549-RA	94.39	624	35	0	1	624	0	959
DR_013857-RA	DR_001722-RA	93.83	1037	60	3	1	1035	0	1526
DR_006375-RA	DR_000232-RA	94.86	915	47	0	1	915	0	1441
DR_006410-RA	DR_000267-RA	94.44	234	13	0	229	462	5e-100	361
DR_006410-RA	DR_000267-RA	95.4	87	4	0	1	87	9e-34	141
DR_006392-RA	DR_000249-RA	93.31	5425	360	1	15	5436	0	7872
DR_006394-RA	DR_000251-RA	94.97	2147	108	0	1	2147	0	3400
DR_006406-RA	DR_000263-RA	92.8	514	37	0	8	521	0	726
DR_006418-RA	DR_000274-RA	93.42	1764	116	0	42	1805	0	2577
DR_006407-RA	DR_000264-RA	93.74	1518	95	0	31	1548	0	2256
DR_007027-RA	DR_002654-RA	95.21	1044	50	0	1	1044	0	1673
DR_007003-RA	DR_002629-RA	91.92	495	34	2	10	503	0	656
DR_007003-RA	DR_002629-RA	90.32	124	12	0	569	692	9e-37	151
DR_007008-RA	DR_002635-RA	95.91	1125	46	0	482	1606	0	1865
DR_007008-RA	DR_002635-RA	95.24	336	16	0	1	336	2e-153	539
DR_007004-RA	DR_002631-RA	94.74	7491	394	0	1	7491	0	11730
DR_006996-RA	DR_002622-RA	94.77	1529	80	0	1	1529	0	2397
DR_006998-RA	DR_002624-RA	94.58	1272	69	0	1	1272	0	1974
DR_008850-RA	DR_013564-RA	95.38	1365	57	1	94	1452	0	2208
DR_008850-RA	DR_013564-RA	93.48	92	6	0	1	92	1e-31	135
DR_008848-RA	DR_013562-RA	94.35	1098	59	1	1	1095	0	1681
DR_008848-RA	DR_013562-RA	96.07	305	12	0	1477	1781	2e-144	509
DR_008848-RA	DR_013562-RA	96.77	62	2	0	1155	1216	3e-23	107
DR_008886-RA	DR_003080-RA	93.97	1625	98	0	1	1625	0	2444
DR_008875-RA	DR_010806-RA	92.34	1737	133	0	1	1737	0	2389
DR_008871-RA	DR_010810-RA	91.67	1128	94	0	1	1128	0	1491
DR_008871-RA	DR_010810-RA	91.11	664	59	0	1200	1863	0	848
DR_008878-RA	DR_003088-RA	92.89	450	32	0	5	454	0	638
DR_008878-RA	DR_003088-RA	95.52	134	6	0	598	731	5e-57	218
DR_011996-RA	DR_005796-RA	96.53	3714	129	0	1	3714	0	6340
DR_011996-RA	DR_005796-RA	98.09	157	3	0	3713	3869	3e-77	287
DR_011994-RA	DR_005793-RA	95.23	1278	61	0	1	1278	0	2050
DR_011994-RA	DR_005793-RA	94.38	178	10	0	1277	1454	4e-73	274
DR_013165-RA	DR_009375-RA	95.38	822	38	0	1	822	0	1328
DR_013177-RA	DR_009386-RA	92.53	1326	97	1	22	1345	0	1838
DR_013174-RA	DR_009383-RA	95.32	1132	50	1	96	1224	0	1820
DR_013174-RA	DR_009383-RA	96.88	96	3	0	1	96	3e-41	167
DR_012766-RA	DR_005285-RA	91.43	1178	99	1	76	1251	0	1528
DR_012767-RA	DR_005284-RA	93.49	1521	99	0	1	1521	0	2230
DR_004015-RA	DR_008338-RA	94.25	1512	87	0	1	1512	0	2307
DR_004001-RA	DR_008352-RA	98.83	342	4	0	184	525	0	646
DR_004001-RA	DR_008352-RA	98.28	58	1	0	104	161	9e-24	107
DR_003997-RA	DR_008356-RA	95.63	1786	78	0	462	2247	0	2922
DR_003997-RA	DR_008356-RA	96.31	298	11	0	164	461	2e-142	504
DR_003997-RA	DR_008356-RA	96.34	164	6	0	1	164	2e-74	278
DR_004042-RA	DR_013674-RA	94.03	1492	89	0	1	1492	0	2252
DR_004027-RA	DR_008326-RA	92.4	1210	84	3	1	1203	0	1655
DR_004039-RA	DR_013670-RA	90.2	694	63	2	1	693	0	827
DR_004026-RA	DR_008327-RA	92.98	2123	149	0	896	3018	0	3027
DR_004026-RA	DR_008327-RA	94.85	699	36	0	28	726	0	1100
DR_004026-RA	DR_008327-RA	92.12	165	13	0	731	895	3e-58	224
DR_004036-RA	DR_001948-RA	88.28	1561	168	4	1489	3040	0	1633
DR_004036-RA	DR_001948-RA	92.05	1056	84	0	3043	4098	0	1427
DR_004037-RA	DR_013668-RA	87.54	634	79	0	804	1437	0	630
DR_004037-RA	DR_013668-RA	84.94	551	83	0	126	676	9e-122	434
DR_004037-RA	DR_013668-RA	93.94	99	6	0	679	777	8e-36	149
DR_004050-RA	DR_007765-RA	92.73	1431	104	0	1	1431	0	2012
DR_004082-RA	DR_012857-RA	91.87	1734	132	2	58	1782	0	2317
DR_004077-RA	DR_007738-RA	94.13	358	21	0	1	358	7e-155	543
DR_004077-RA	DR_007738-RA	81.92	260	46	1	459	717	6e-32	135
DR_004063-RA	DR_007751-RA	94.6	3205	173	0	1	3205	0	4982
DR_004063-RA	DR_007751-RA	92	75	6	0	3313	3387	4e-21	101
DR_004064-RA	DR_007750-RA	93.82	1506	93	0	1	1506	0	2248
DR_004083-RA	DR_012858-RA	94.85	1689	78	1	1	1689	0	2666
DR_004078-RA	DR_007737-RA	95.9	1657	68	0	49	1705	0	2746
DR_004078-RA	DR_007737-RA	94.66	973	52	0	1755	2727	0	1516
DR_004081-RA	DR_012856-RA	93.98	830	50	0	11	840	0	1249
DR_004067-RA	DR_007747-RA	93.23	384	26	0	1	384	9e-159	555
DR_008071-RA	DR_000166-RA	94.18	4947	285	1	1	4944	0	7519
DR_008072-RA	DR_000165-RA	93.94	1385	84	0	5	1389	0	2079
DR_008095-RA	DR_000143-RA	93.05	734	51	0	1	734	0	1051
DR_008079-RA	DR_000158-RA	92.36	1650	120	2	13	1659	0	2264
DR_008097-RA	DR_000141-RA	95.64	2066	81	1	1	2057	0	3390
DR_008097-RA	DR_000141-RA	95.92	735	30	0	2065	2799	0	1219
DR_008107-RA	DR_000131-RA	93.2	2705	184	0	8	2712	0	3903
DR_008110-RA	DR_000128-RA	94.68	1484	73	1	1	1478	0	2317
DR_008110-RA	DR_000128-RA	95.14	1420	69	0	1719	3138	0	2268
DR_008110-RA	DR_000128-RA	94.98	239	12	0	1478	1716	1e-104	379
DR_002353-RA	DR_012744-RA	93.11	1830	126	0	1	1830	0	2629
DR_002352-RA	DR_012745-RA	94.13	1329	78	0	1	1329	0	2016
DR_002345-RA	DR_006182-RA	93.4	970	64	0	1	970	0	1415
DR_002344-RA	DR_006181-RA	95.4	870	40	0	1	870	0	1407
DR_002379-RA	DR_012122-RA	93.33	495	33	0	1	495	0	720
DR_002374-RA	DR_012127-RA	92.96	1947	131	4	15	1956	0	2746
DR_002374-RA	DR_002375-RA	100	38	0	0	1919	1956	1e-13	75.8
DR_002367-RA	DR_012550-RA	94.63	2103	113	0	61	2163	0	3273
DR_002375-RA	DR_012126-RA	95.73	726	31	0	1	726	0	1193
DR_002375-RA	DR_002374-RA	100	38	0	0	689	726	5e-14	75.8
DR_002406-RA	DR_010409-RA	95.87	1695	67	1	1	1695	0	2801
DR_002386-RA	DR_012115-RA	94.41	3057	171	0	1562	4618	0	4704
DR_002386-RA	DR_012115-RA	94.39	1534	86	0	1	1534	0	2359
DR_002386-RA	DR_012115-RA	93.72	478	30	0	4937	5414	0	710
DR_002404-RA	DR_010411-RA	94.49	4305	237	0	1	4305	0	6655
DR_002396-RA	DR_010419-RA	93.82	857	53	0	231	1087	0	1279
DR_002396-RA	DR_010419-RA	92.23	206	16	0	1	206	6e-76	281
DR_002395-RA	DR_010420-RA	96.97	297	9	0	1	297	2e-147	517
DR_002426-RA	DR_013106-RA	95.23	1468	69	1	1	1468	0	2347
DR_002423-RA	DR_010391-RA	92.46	783	59	0	4	786	0	1084
DR_002421-RA	DR_010393-RA	95.3	3022	139	1	1064	4085	0	4861
DR_002421-RA	DR_010393-RA	91.74	1065	88	0	1	1065	0	1413
DR_002421-RA	DR_010393-RA	95.93	614	25	0	4088	4701	0	1019
DR_002416-RA	DR_010399-RA	89.89	544	51	3	23	563	3e-178	620
DR_002443-RA	DR_012637-RA	96.97	330	10	0	196	525	2e-164	575
DR_002443-RA	DR_012637-RA	96.43	308	11	0	526	833	7e-149	523
DR_002443-RA	DR_012637-RA	96.52	115	4	0	1	115	2e-50	196
DR_002438-RA	DR_012631-RA	94.93	1400	71	0	1	1400	0	2212
DR_002438-RA	DR_012631-RA	95.39	304	14	0	1401	1704	5e-139	492
DR_013020-RA	DR_013021-RA	100	966	0	0	947	1912	0	1915
DR_013020-RA	DR_003974-RA	95.11	962	47	0	951	1912	0	1534
DR_013022-RA	DR_003975-RA	93.86	1123	69	0	1	1123	0	1679
DR_013021-RA	DR_013020-RA	100	966	0	0	145	1110	0	1915
DR_013021-RA	DR_003974-RA	95.17	974	47	0	133	1106	0	1558
DR_013021-RA	DR_003974-RA	90.41	73	7	0	1	73	5e-18	89.7
DR_013019-RA	DR_003972-RA	88.18	1480	149	10	95	1567	0	1499
DR_013029-RA	DR_003981-RA	95.33	921	43	0	651	1571	0	1485
DR_013029-RA	DR_003981-RA	96.31	407	15	0	208	614	0	688
DR_013029-RA	DR_003981-RA	92.86	126	9	0	27	152	9e-45	178
DR_013026-RA	DR_003979-RA	93.21	943	64	0	1	943	0	1362
DR_013026-RA	DR_003979-RA	89.54	411	43	0	976	1386	1e-133	474
DR_009963-RA	DR_010310-RA	93.07	750	49	1	1	747	0	1070
DR_009963-RA	DR_010310-RA	94.67	150	8	0	895	1044	1e-61	234
DR_009988-RA	DR_010283-RA	95.28	1865	88	0	401	2265	0	2999
DR_009988-RA	DR_010283-RA	91.71	398	33	0	1	398	1e-149	527
DR_010013-RA	DR_003697-RA	96	2549	101	1	1160	3707	0	4236
DR_010013-RA	DR_003697-RA	94.03	1155	68	1	1	1155	0	1735
DR_009976-RA	DR_010296-RA	94.82	1835	95	0	59	1893	0	2884
DR_009972-RA	DR_010300-RA	96.17	287	11	0	1	287	1e-136	482
DR_009972-RA	DR_010300-RA	96.55	58	2	0	335	392	2e-21	99.6
DR_009987-RA	DR_010284-RA	94.67	1764	94	0	1	1764	0	2752
DR_010011-RA	DR_003699-RA	94.85	4819	248	0	1	4819	0	7586
DR_010011-RA	DR_003699-RA	98.2	111	2	0	4808	4918	6e-52	204
DR_010011-RA	DR_003699-RA	97.98	99	2	0	4919	5017	9e-45	180
DR_009977-RA	DR_010295-RA	95.89	1264	50	1	1	1262	0	2087
DR_009973-RA	DR_010299-RA	92.88	295	21	0	35	329	2e-117	418
DR_009973-RA	DR_010299-RA	93.18	132	9	0	383	514	8e-49	190
DR_009990-RA	DR_010281-RA	98.75	240	3	0	1	240	6e-128	452
DR_005358-RA	DR_011861-RA	95.75	2636	110	1	256	2891	0	4331
DR_005364-RA	DR_011854-RA	94.76	1528	80	0	94	1621	0	2395
DR_005368-RA	DR_011849-RA	94.14	1604	87	1	1	1597	0	2438
DR_005395-RA	DR_007116-RA	94.74	1216	64	0	1	1216	0	1903
DR_005390-RA	DR_007111-RA	92.45	477	36	0	1	477	0	660
DR_005376-RA	DR_013682-RA	94.11	1086	64	0	20	1105	0	1645
DR_005398-RA	DR_007119-RA	90.76	963	84	3	1	958	0	1183
DR_005420-RA	DR_007142-RA	92.42	633	45	1	1	630	0	870
DR_005417-RA	DR_007139-RA	94.49	3449	189	1	9	3456	0	5323
DR_003903-RA	DR_009895-RA	94.16	531	30	1	1	530	0	799
DR_003915-RA	DR_009883-RA	93.19	1248	85	0	1	1248	0	1800
DR_003911-RA	DR_009887-RA	91.51	683	58	0	1	683	0	894
DR_003911-RA	DR_009887-RA	88.38	327	38	0	694	1020	1e-95	347
DR_003907-RA	DR_009891-RA	94.53	3948	216	0	1	3948	0	6114
DR_003934-RA	DR_012675-RA	93.03	1349	92	2	1	1347	0	1913
DR_003920-RA	DR_009878-RA	94.99	719	34	1	78	796	0	1134
DR_003920-RA	DR_009878-RA	92.19	64	5	0	14	77	1e-17	87.7
DR_003919-RA	DR_009879-RA	95.43	1971	90	0	1	1971	0	3194
DR_003926-RA	DR_009871-RA	93.61	876	56	0	495	1370	0	1292
DR_003926-RA	DR_009871-RA	96.94	392	12	0	3	394	0	682
DR_003958-RA	DR_013004-RA	95.17	2341	109	3	8	2348	0	3723
DR_003958-RA	DR_013004-RA	85.82	134	17	2	2414	2545	1e-20	99.6
DR_003967-RA	DR_013014-RA	95.07	1035	45	1	1	1029	0	1649
DR_003953-RA	DR_012999-RA	94.99	1238	60	1	1	1238	0	1957
DR_003975-RA	DR_013022-RA	93.86	1123	69	0	166	1288	0	1679
DR_003974-RA	DR_013021-RA	95.17	974	47	0	76	1049	0	1558
DR_003974-RA	DR_013021-RA	90.41	73	7	0	1	73	4e-18	89.7
DR_003974-RA	DR_013020-RA	95.11	962	47	0	88	1049	0	1534
DR_003972-RA	DR_013019-RA	88.18	1480	149	10	100	1560	0	1499
DR_003987-RA	DR_003715-RA	90.37	2211	213	0	1074	3284	0	2694
DR_003987-RA	DR_003715-RA	93.24	148	10	0	885	1032	4e-55	214
DR_003990-RA	DR_003718-RA	97.67	557	13	0	327	883	0	1001
DR_003990-RA	DR_003718-RA	95.71	326	14	0	1	326	3e-152	535
DR_003995-RA	DR_012991-RA	92.13	1614	127	0	1124	2737	0	2192
DR_003995-RA	DR_012991-RA	92.83	1060	76	0	1	1060	0	1499
[truncated: 854 more rows]

## Sheet: Gene_allBLAST
Query	Target	Ident	length	miss	Gaps	Start	Stop	e-Value	Bit_score
DR_000003-RA	DR_004637-RA	95.07	1135	56	0	5	1139	0	1806
DR_000003-RA	DR_004637-RA	92.22	334	26	0	1264	1597	3e-128	456
DR_000010-RA	DR_004644-RA	92.23	1146	84	3	26	1169	0	1546
DR_000023-RA	DR_004654-RA	94.87	2435	123	1	1	2435	0	3830
DR_000033-RA	DR_004664-RA	93.09	1432	85	7	1	1430	0	2012
DR_000039-RA	DR_004670-RA	90.76	1191	95	6	21	1198	0	1459
DR_000039-RA	DR_004670-RA	92.41	804	61	0	1248	2051	0	1110
DR_000048-RA	DR_004678-RA	93.62	1490	93	2	1	1488	0	2185
DR_000048-RA	DR_004678-RA	95.28	106	5	0	1490	1595	3e-42	170
DR_000060-RA	DR_004690-RA	94.97	3558	179	0	356	3913	0	5634
DR_000060-RA	DR_004690-RA	96.39	305	11	0	1	305	2e-146	517
DR_000061-RA	DR_004691-RA	95.15	1651	79	1	1	1650	0	2631
DR_000064-RA	DR_004695-RA	94.34	1043	59	0	1	1043	0	1600
DR_000066-RA	DR_004697-RA	94	2382	140	1	1	2379	0	3584
DR_000068-RA	DR_004699-RA	94.77	1779	93	0	1	1779	0	2789
DR_000076-RA	DR_004707-RA	92.08	2814	201	9	540	3335	0	3764
DR_000076-RA	DR_004707-RA	95.4	478	22	0	1	478	0	773
DR_000080-RA	DR_004712-RA	95.68	1665	72	0	1	1665	0	2730
DR_000080-RA	DR_004712-RA	93.45	504	33	0	1684	2187	0	737
DR_000086-RA	DR_009657-RA	95.01	2344	117	0	2619	4962	0	3719
DR_000086-RA	DR_009657-RA	94.65	1178	57	2	1	1172	0	1828
DR_000086-RA	DR_009657-RA	97.42	852	22	0	1715	2566	0	1515
DR_000086-RA	DR_009657-RA	96.36	330	12	0	1213	1542	2e-158	559
DR_000098-RA	DR_009669-RA	92.28	1244	91	4	15	1255	0	1675
DR_000118-RA	DR_009690-RA	94.64	4101	216	1	1	4097	0	6383
DR_000128-RA	DR_008110-RA	95.15	1692	81	1	1	1691	0	2696
DR_000128-RA	DR_008110-RA	95.14	1420	69	0	1929	3348	0	2268
DR_000128-RA	DR_008110-RA	95.44	263	12	0	1643	1905	6e-119	426
DR_000131-RA	DR_008107-RA	93.06	2851	198	0	8	2858	0	4082
DR_000141-RA	DR_008097-RA	95.11	2370	116	0	1	2370	0	3778
DR_000141-RA	DR_008097-RA	95.92	735	30	0	2492	3226	0	1219
DR_000143-RA	DR_008095-RA	92.44	780	59	0	1	780	0	1078
DR_000158-RA	DR_008079-RA	92.36	1650	120	2	13	1659	0	2264
DR_000165-RA	DR_008072-RA	93.72	1434	90	0	5	1438	0	2129
DR_000166-RA	DR_008071-RA	93.79	5172	317	2	1	5172	0	7695
DR_000189-RA	DR_012048-RA	91.42	1317	106	2	1	1311	0	1709
DR_000189-RA	DR_012048-RA	92.99	428	30	0	1331	1758	9e-175	611
DR_000190-RA	DR_012047-RA	94.16	1626	94	1	1	1625	0	2462
DR_000191-RA	DR_012046-RA	95.19	1497	72	0	2122	3618	0	2397
DR_000191-RA	DR_012046-RA	94.23	572	33	0	1525	2096	0	872
DR_000197-RA	DR_012038-RA	94.85	2896	149	0	5	2900	0	4559
DR_000197-RA	DR_012038-RA	93.68	570	34	1	3031	3600	0	839
DR_000199-RA	DR_012036-RA	93.4	1031	66	2	2347	3376	0	1489
DR_000203-RA	DR_001890-RA	93.19	1880	128	0	1	1880	0	2712
DR_000203-RA	DR_001890-RA	94.07	135	8	0	1875	2009	2e-52	204
DR_000221-RA	DR_001871-RA	90.4	2073	193	2	10	2076	0	2524
DR_000222-RA	DR_001870-RA	93.79	1949	120	1	1	1948	0	2896
DR_000232-RA	DR_006375-RA	94.86	915	47	0	1	915	0	1441
DR_000249-RA	DR_006392-RA	93.17	5538	373	2	15	5552	0	7971
DR_000251-RA	DR_006394-RA	94.41	2288	128	0	1	2288	0	3521
DR_000263-RA	DR_006406-RA	91	678	57	3	9	685	0	839
DR_000264-RA	DR_006407-RA	93.29	1714	114	1	34	1747	0	2478
DR_000267-RA	DR_006410-RA	94.94	257	13	0	242	498	8e-114	406
DR_000267-RA	DR_006410-RA	94.03	201	12	0	1	201	8e-83	303
DR_000274-RA	DR_006418-RA	92.74	2025	142	2	41	2065	0	2839
DR_000290-RA	DR_013535-RA	95.49	2418	109	0	1	2418	0	3929
DR_000291-RA	DR_013536-RA	95.01	3544	171	1	1	3538	0	5624
DR_000302-RA	DR_002458-RA	88.93	1265	134	2	750	2008	0	1390
DR_000302-RA	DR_002458-RA	91.6	238	20	0	247	484	3e-85	313
DR_000302-RA	DR_002458-RA	88.13	160	16	1	31	187	8e-40	163
DR_000302-RA	DR_002458-RA	97.53	81	2	0	550	630	2e-34	145
DR_000307-RA	DR_002463-RA	93.45	2685	175	1	1	2685	0	3919
DR_000310-RA	DR_002466-RA	94.84	2285	113	2	1	2282	0	3584
DR_000314-RA	DR_002470-RA	95.36	1725	80	0	1	1725	0	2785
DR_000325-RA	DR_002479-RA	95.35	1527	71	0	790	2316	0	2464
DR_000325-RA	DR_002479-RA	92.61	595	38	2	1	590	0	823
DR_000326-RA	DR_002480-RA	95.69	2344	101	0	1	2344	0	3846
DR_000327-RA	DR_002481-RA	96.51	630	22	0	607	1236	0	1074
DR_000327-RA	DR_002481-RA	89.34	572	60	1	1	571	0	642
DR_000330-RA	DR_002484-RA	93.69	1808	114	0	1	1808	0	2680
DR_000336-RA	DR_002490-RA	94.28	2781	156	1	1	2781	0	4248
DR_000341-RA	DR_002495-RA	94.25	678	36	1	97	774	0	1031
DR_000342-RA	DR_002496-RA	95.55	1146	51	0	37	1182	0	1867
DR_000361-RA	DR_002516-RA	94.67	6472	342	1	1	6469	0	10090
DR_000363-RA	DR_002518-RA	95.13	3369	160	1	1	3365	0	5376
DR_000364-RA	DR_002519-RA	95.25	3518	164	3	23	3539	0	5626
DR_000365-RA	DR_002520-RA	92.37	930	71	0	7	936	0	1281
DR_000371-RA	DR_002526-RA	94.47	1410	71	2	1	1403	0	2171
DR_000391-RA	DR_002546-RA	93.7	2443	149	3	4	2445	0	3602
DR_000392-RA	DR_002547-RA	92.43	1599	115	1	1	1593	0	2212
DR_000394-RA	DR_002549-RA	92.41	3044	226	5	1	3042	0	4163
DR_000395-RA	DR_002550-RA	91.95	2261	173	2	1	2255	0	3037
DR_000398-RA	DR_002554-RA	94.58	1015	54	1	1	1015	0	1568
DR_000408-RA	DR_002563-RA	92.68	560	37	2	473	1032	0	773
DR_000408-RA	DR_002563-RA	93.7	349	22	0	1	349	6e-147	517
DR_000409-RA	DR_002564-RA	93.99	1497	90	0	1	1497	0	2254
DR_000443-RA	DR_009226-RA	94.86	2025	104	0	1	2025	0	3190
DR_000454-RA	DR_009216-RA	93.26	1231	83	0	1	1231	0	1782
DR_000465-RA	DR_011120-RA	94.29	2102	114	3	1	2097	0	3198
DR_000471-RA	DR_011115-RA	93.99	3426	203	2	36	3458	0	5144
DR_000472-RA	DR_011114-RA	95.22	2219	106	0	1	2219	0	3558
DR_000472-RA	DR_011114-RA	93.97	1144	66	1	2225	3365	0	1717
DR_000472-RA	DR_011114-RA	95.32	385	18	0	4401	4785	3e-177	620
DR_000472-RA	DR_011114-RA	93.61	391	25	0	3927	4317	4e-164	577
DR_000472-RA	DR_011114-RA	85.86	99	14	0	4902	5000	4e-16	85.7
DR_000483-RA	DR_011167-RA	91.91	2053	166	0	2	2054	0	2753
DR_000484-RA	DR_011168-RA	92.57	1386	103	0	1	1386	0	1931
DR_000496-RA	DR_012873-RA	94.43	7287	406	0	1	7287	0	11230
DR_000496-RA	DR_012873-RA	94.79	96	5	0	7292	7387	1e-35	151
DR_000503-RA	DR_012866-RA	93.82	2137	124	3	1	2134	0	3176
DR_000514-RA	DR_013709-RA	94.53	750	41	0	1	750	0	1162
DR_000514-RA	DR_013709-RA	96.19	577	22	0	799	1375	0	969
DR_000521-RA	DR_005175-RA	94.11	1358	80	0	1	1358	0	2058
DR_000542-RA	DR_005152-RA	95.18	2136	102	1	1	2136	0	3410
DR_000555-RA	DR_005139-RA	94.02	1939	108	4	1	1932	0	2900
DR_000566-RA	DR_005128-RA	95.51	3294	146	1	103	3394	0	5350
DR_000566-RA	DR_005128-RA	96.68	1416	47	0	3450	4865	0	2434
DR_000567-RA	DR_005127-RA	93.8	3741	217	6	7683	11416	0	5547
DR_000567-RA	DR_005127-RA	93.21	3211	216	2	4351	7560	0	4621
DR_000567-RA	DR_005127-RA	93.43	2297	148	3	1	2296	0	3332
DR_000567-RA	DR_005127-RA	93.36	1507	99	1	2616	4121	0	2187
DR_000567-RA	DR_005127-RA	91.14	158	13	1	2406	2563	1e-48	194
DR_000567-RA	DR_005127-RA	93.67	79	5	0	4235	4313	2e-25	117
DR_000572-RA	DR_005123-RA	95.38	3202	147	1	3	3203	0	5166
DR_000582-RA	DR_005111-RA	91.05	905	79	2	1427	2329	0	1136
DR_000582-RA	DR_005111-RA	91.71	422	35	0	324	745	4e-159	559
DR_000582-RA	DR_005111-RA	92.91	254	18	0	27	280	2e-99	361
DR_000582-RA	DR_005111-RA	93.62	235	15	0	979	1213	3e-95	347
DR_000582-RA	DR_005111-RA	97.26	73	2	0	880	952	1e-29	129
DR_000582-RA	DR_005111-RA	90.74	108	8	2	1207	1314	1e-26	119
DR_000587-RA	DR_012138-RA	92.73	4637	332	3	1	4633	0	6500
DR_000590-RA	DR_012141-RA	92.24	670	50	2	1	669	0	900
DR_000592-RA	DR_012144-RA	93.21	9044	596	9	46	9080	0	13010
DR_000592-RA	DR_012143-RA	95.59	3492	153	1	9829	13319	0	5693
DR_000593-RA	DR_012145-RA	94.41	1412	79	0	1	1412	0	2173
DR_000596-RA	DR_012148-RA	93.14	2333	142	9	1	2318	0	3303
DR_000597-RA	DR_012149-RA	95.57	1739	77	0	1	1739	0	2837
DR_000608-RA	DR_013453-RA	95.16	2397	116	0	1	2397	0	3832
DR_000612-RA	DR_013449-RA	93.68	1819	112	1	1	1819	0	2690
DR_000632-RA	DR_004484-RA	94.23	2859	151	8	1	2850	0	4308
DR_000633-RA	DR_004485-RA	94.05	1480	85	1	1	1480	0	2232
DR_000633-RA	DR_004485-RA	96.53	691	24	0	1504	2194	0	1179
DR_000633-RA	DR_004485-RA	94.5	291	14	2	2185	2474	2e-121	434
DR_000633-RA	DR_004485-RA	93.84	276	17	0	2477	2752	7e-115	412
DR_000636-RA	DR_004488-RA	95.43	3193	146	0	18	3210	0	5172
DR_000648-RA	DR_004501-RA	93.95	777	47	0	1	777	0	1168
DR_000650-RA	DR_004503-RA	96.43	3024	107	1	1	3024	0	5130
DR_000652-RA	DR_004505-RA	95.8	810	34	0	1	810	0	1336
DR_000652-RA	DR_004505-RA	94.39	196	11	0	928	1123	9e-82	301
DR_000664-RA	DR_004516-RA	93.17	615	40	2	155	767	0	870
DR_000665-RA	DR_004517-RA	93.31	852	56	1	1	852	0	1229
DR_000668-RA	DR_004520-RA	95.54	1840	81	1	1	1839	0	2989
DR_000671-RA	DR_004523-RA	94.01	1135	62	1	1	1129	0	1713
DR_000679-RA	DR_004530-RA	94.93	1224	61	1	1	1223	0	1927
DR_000689-RA	DR_004539-RA	95.97	1391	54	1	272	1662	0	2307
DR_000689-RA	DR_004539-RA	93.96	149	9	0	1	149	2e-58	224
DR_000693-RA	DR_004543-RA	92.67	1651	121	0	1	1651	0	2313
DR_000693-RA	DR_004543-RA	95.83	96	4	0	1654	1749	1e-38	159
DR_000694-RA	DR_004544-RA	94.03	2579	152	2	178	2755	0	3875
DR_000694-RA	DR_004544-RA	95.29	191	9	0	4	194	3e-83	307
DR_000706-RA	DR_001902-RA	94.84	4267	217	3	210	4474	0	6690
DR_000712-RA	DR_001909-RA	95.24	2162	103	0	1	2162	0	3469
DR_000721-RA	DR_001919-RA	91.99	1599	127	1	1	1599	0	2147
DR_000723-RA	DR_001921-RA	89.17	1173	116	3	2	1166	0	1310
DR_000726-RA	DR_001924-RA	94.76	3471	176	2	1	3465	0	5430
DR_000728-RA	DR_001926-RA	94.55	1798	92	2	1	1792	0	2779
DR_000731-RA	DR_001929-RA	96.38	1242	45	0	35	1276	0	2105
DR_000754-RA	DR_010579-RA	94.9	2414	123	0	1	2414	0	3810
DR_000761-RA	DR_010572-RA	93.28	923	51	4	1	921	0	1320
DR_000766-RA	DR_010567-RA	93.26	5413	362	1	1	5413	0	7832
DR_000770-RA	DR_010564-RA	94.06	1751	101	1	1	1748	0	2642
DR_000770-RA	DR_010564-RA	92.77	429	31	0	2127	2555	8e-173	605
DR_000770-RA	DR_010564-RA	93.12	189	10	1	1887	2075	2e-71	268
DR_000816-RA	DR_006931-RA	93.59	1576	101	0	1	1576	0	2323
DR_000817-RA	DR_006930-RA	90.22	1810	166	2	1	1810	0	2187
DR_000817-RA	DR_006930-RA	94.46	1354	72	1	1813	3166	0	2085
DR_001057-RA	DR_011158-RA	94.12	3112	175	2	29	3132	0	4714
DR_001066-RA	DR_007825-RA	94.01	1804	107	1	1	1803	0	2712
DR_001068-RA	DR_007823-RA	94.18	5460	317	1	1	5459	0	8294
DR_001076-RA	DR_007814-RA	93.62	893	55	2	1	892	0	1302
DR_001079-RA	DR_007811-RA	93.95	2742	166	0	1	2742	0	4119
DR_001084-RA	DR_007805-RA	95.38	2423	109	1	1	2423	0	3911
DR_001087-RA	DR_007802-RA	94.64	2796	147	2	5	2798	0	4339
DR_001089-RA	DR_007800-RA	95.83	2325	97	0	613	2937	0	3840
DR_001089-RA	DR_007800-RA	94.52	584	30	1	20	601	0	898
DR_001090-RA	DR_007799-RA	94.68	1522	81	0	1	1522	0	2375
DR_001093-RA	DR_007796-RA	94.53	1188	62	1	317	1504	0	1836
DR_001095-RA	DR_007794-RA	91.47	1677	143	0	1	1677	0	2190
DR_001102-RA	DR_007787-RA	93.6	1532	97	1	68	1598	0	2252
DR_001102-RA	DR_007787-RA	97.41	116	3	0	1	116	5e-53	206
DR_001103-RA	DR_007786-RA	91.66	3273	265	4	1	3265	0	4300
DR_001117-RA	DR_007772-RA	91.78	766	55	3	31	788	0	1005
DR_001117-RA	DR_007772-RA	90.59	85	8	0	789	873	7e-23	105
DR_001118-RA	DR_012941-RA	90.94	2351	201	6	15	2360	0	2936
DR_001122-RA	DR_012938-RA	93.28	2677	177	1	1	2677	0	3875
DR_001128-RA	DR_012932-RA	93.69	1411	86	3	82	1489	0	2068
DR_001130-RA	DR_012931-RA	94.01	1921	114	1	20	1939	0	2888
DR_001135-RA	DR_012927-RA	92.58	876	64	1	153	1027	0	1213
DR_001135-RA	DR_012927-RA	89.57	652	55	9	1231	1877	0	690
DR_001135-RA	DR_012927-RA	92.24	116	9	0	1064	1179	1e-38	159
DR_001139-RA	DR_003797-RA	94.31	1547	86	2	1	1545	0	2353
DR_001139-RA	DR_003797-RA	95.21	501	24	0	1569	2069	0	803
DR_001139-RA	DR_003797-RA	93.75	96	6	0	2072	2167	8e-34	143
DR_001140-RA	DR_003796-RA	95.86	1134	46	1	1	1134	0	1867
DR_001141-RA	DR_003795-RA	93.29	1311	88	0	814	2124	0	1901
DR_001141-RA	DR_003795-RA	93.11	827	57	0	1	827	0	1187
DR_001143-RA	DR_003793-RA	89.18	1017	99	4	1	1012	0	1126
DR_001143-RA	DR_003793-RA	88	75	9	0	1106	1180	2e-14	77.8
DR_001151-RA	DR_003785-RA	94.1	2050	121	0	1	2050	0	3104
DR_001151-RA	DR_003785-RA	93.91	427	26	0	2079	2505	0	640
DR_001155-RA	DR_003781-RA	95.97	1838	71	1	409	2246	0	3053
DR_001155-RA	DR_003781-RA	93.14	379	18	3	38	414	9e-151	531
DR_001165-RA	DR_003771-RA	95.13	718	35	0	353	1070	0	1146
DR_001165-RA	DR_003771-RA	94.24	695	40	0	1023	1717	0	1061
DR_001165-RA	DR_003771-RA	95.26	612	27	1	1	610	0	977
DR_001165-RA	DR_003771-RA	96.43	168	6	0	562	729	7e-77	285
DR_001170-RA	DR_003767-RA	95.2	4421	212	0	1	4421	0	7083
DR_001178-RA	DR_003758-RA	94.25	1287	71	1	1	1287	0	1961
DR_001191-RA	DR_003745-RA	92.36	1453	109	2	1	1451	0	1984
DR_001196-RA	DR_003740-RA	96.32	897	33	0	1	897	0	1516
DR_001211-RA	DR_003725-RA	93.78	5307	321	4	1	5302	0	7882
DR_001233-RA	DR_013715-RA	94.37	781	44	0	1	781	0	1199
DR_001245-RA	DR_005302-RA	94.72	1117	59	0	392	1508	0	1746
DR_001245-RA	DR_005302-RA	95.99	299	12	0	1	299	8e-141	498
DR_001256-RA	DR_005313-RA	95.08	1545	72	3	1	1541	0	2438
DR_001261-RA	DR_005318-RA	92.96	867	54	4	1	862	0	1209
DR_001266-RA	DR_005324-RA	93.51	1418	90	2	29	1446	0	2066
DR_001277-RA	DR_011151-RA	90.5	1190	110	1	985	2171	0	1459
DR_001277-RA	DR_011151-RA	88.39	818	82	7	166	979	0	825
DR_001277-RA	DR_011151-RA	92.75	138	10	0	1	138	2e-49	194
DR_001307-RA	DR_008227-RA	94.42	2185	120	2	454	2637	0	3348
DR_001307-RA	DR_008227-RA	93.77	514	32	0	3393	3906	0	765
DR_001307-RA	DR_008227-RA	87.99	691	83	0	2650	3340	0	712
DR_001307-RA	DR_008227-RA	93.67	442	25	1	1	439	0	650
DR_001319-RA	DR_008238-RA	95.51	3989	177	1	1	3989	0	6482
DR_001326-RA	DR_008245-RA	93.35	722	48	0	15	736	0	1051
DR_001328-RA	DR_008247-RA	95.44	1184	49	1	1	1179	0	1919
DR_001335-RA	DR_008255-RA	94.8	3155	162	2	1	3153	0	4938
DR_001342-RA	DR_008263-RA	94.4	1715	93	1	684	2395	0	2635
DR_001342-RA	DR_008263-RA	94.15	615	32	1	31	645	0	932
DR_001344-RA	DR_008265-RA	94.78	1418	73	1	81	1497	0	2216
DR_001354-RA	DR_005353-RA	94.82	4109	204	3	1	4109	0	6445
DR_001360-RA	DR_005346-RA	90.95	1536	139	0	1	1536	0	1943
DR_001377-RA	DR_002273-RA	94.88	2244	109	2	1	2238	0	3529
DR_001377-RA	DR_002273-RA	88.14	295	29	2	2241	2529	7e-81	299
DR_001386-RA	DR_002282-RA	91.36	1018	88	0	1	1018	0	1320
DR_001390-RA	DR_002286-RA	93.65	1732	95	5	18	1737	0	2541
DR_001403-RA	DR_002299-RA	92.57	3272	225	3	2	3264	0	4565
DR_001413-RA	DR_002308-RA	95.58	2580	114	0	1	2580	0	4211
DR_001415-RA	DR_002310-RA	96.18	1309	50	0	1	1309	0	2198
DR_001421-RA	DR_002315-RA	91.91	940	75	1	11	950	0	1253
DR_001422-RA	DR_002316-RA	92.74	4846	342	4	5	4847	0	6796
DR_001434-RA	DR_002328-RA	94.43	2046	114	0	1	2046	0	3152
DR_001435-RA	DR_002329-RA	90.96	2079	170	7	1	2068	0	2597
DR_001440-RA	DR_002334-RA	94.19	2444	142	0	125	2568	0	3719
DR_001440-RA	DR_002334-RA	93.66	505	32	0	2586	3090	0	747
DR_001444-RA	DR_002338-RA	94.48	489	27	0	1	489	0	755
DR_001457-RA	DR_009124-RA	95.49	2862	127	2	3817	6677	0	4635
DR_001457-RA	DR_009124-RA	97.3	111	3	0	6805	6915	2e-49	196
DR_001459-RA	DR_009121-RA	93.56	4174	254	3	1	4168	0	6141
DR_001464-RA	DR_009116-RA	92.51	2762	185	8	2	2745	0	3798
DR_001469-RA	DR_009111-RA	94.32	2643	149	1	55	2697	0	4042
DR_001471-RA	DR_009109-RA	94.43	1095	61	0	1	1095	0	1687
DR_001473-RA	DR_009107-RA	91.52	1026	85	2	1	1024	0	1328
DR_001496-RA	DR_005997-RA	93.58	1948	125	0	1	1948	0	2870
DR_001678-RA	DR_013870-RA	91.93	1413	114	0	1	1413	0	1897
DR_001678-RA	DR_013870-RA	92.61	961	71	0	1582	2542	0	1342
DR_001698-RA	DR_013925-RA	91.61	310	25	1	381	690	6e-112	400
DR_001698-RA	DR_013925-RA	90.68	161	15	0	28	188	1e-51	200
DR_001698-RA	DR_013925-RA	88.52	61	7	0	214	274	5e-11	65.9
DR_001722-RA	DR_013857-RA	93.3	1089	69	3	1	1087	0	1558
DR_001732-RA	DR_013480-RA	93.46	459	27	2	1	459	0	658
DR_001756-RA	DR_012096-RA	93.91	2612	156	1	1	2612	0	3913
DR_001762-RA	DR_012091-RA	95.87	1113	46	0	1	1113	0	1842
DR_001793-RA	DR_011763-RA	93.93	3836	227	1	1	3830	0	5759
DR_001793-RA	DR_011763-RA	91.27	355	31	0	3946	4300	2e-128	458
DR_001799-RA	DR_010665-RA	91.96	1207	96	1	5	1210	0	1616
DR_001801-RA	DR_010667-RA	92.93	1357	95	1	4	1359	0	1921
DR_001801-RA	DR_010667-RA	97.8	91	2	0	1558	1648	2e-40	165
DR_001803-RA	DR_010669-RA	94.46	1245	68	1	1	1244	0	1913
DR_001537-RA	DR_002101-RA	92.42	884	59	2	70	953	0	1217
DR_001538-RA	DR_002102-RA	94.74	2263	119	0	2	2264	0	3542
DR_001544-RA	DR_002108-RA	95.18	1203	58	0	13	1215	0	1925
DR_001547-RA	DR_002111-RA	93.94	1320	79	1	1	1320	0	1974
DR_001563-RA	DR_002125-RA	95.58	2400	103	1	12	2408	0	3913
DR_001564-RA	DR_002126-RA	93.73	2154	134	1	1	2153	0	3192
DR_001568-RA	DR_002130-RA	92.6	1527	113	0	1	1527	0	2131
DR_001569-RA	DR_002131-RA	93.12	3068	208	3	19	3084	0	4385
DR_001570-RA	DR_002132-RA	92.95	1390	95	3	164	1552	0	1955
DR_001570-RA	DR_002132-RA	91.78	146	12	0	24	169	2e-49	194
DR_001574-RA	DR_002137-RA	94.12	3096	171	2	1	3086	0	4696
DR_001578-RA	DR_002141-RA	92.88	1137	76	3	1	1134	0	1592
DR_001578-RA	DR_001579-RA	100	60	0	0	1098	1157	6e-27	119
DR_001579-RA	DR_002142-RA	86.72	911	114	2	22	925	0	841
DR_001579-RA	DR_001578-RA	100	60	0	0	866	925	5e-27	119
DR_001581-RA	DR_002145-RA	90.17	824	75	3	6	828	0	973
DR_001596-RA	DR_002161-RA	90.93	1036	94	0	1	1036	0	1308
DR_001606-RA	DR_002173-RA	94.96	5334	269	0	1	5334	0	8441
DR_001611-RA	DR_002178-RA	96.69	967	31	1	1	966	0	1655
DR_001611-RA	DR_002178-RA	100	45	0	0	1031	1075	5e-18	89.7
DR_001620-RA	DR_002186-RA	92.49	1384	96	4	67	1445	0	1895
DR_001625-RA	DR_002192-RA	94.64	3228	170	1	1	3225	0	5023
DR_001633-RA	DR_002200-RA	94.85	757	39	0	1	757	0	1191
DR_001636-RA	DR_002204-RA	95.54	6734	300	0	1	6734	0	10970
DR_001645-RA	DR_002213-RA	95.14	1419	69	0	1217	2635	0	2266
DR_001645-RA	DR_002213-RA	95.07	1216	57	1	1	1213	0	1931
DR_001656-RA	DR_002224-RA	93.78	1463	87	2	1	1460	0	2167
DR_001658-RA	DR_002226-RA	94.81	462	24	0	91	552	0	726
DR_001658-RA	DR_002226-RA	100	65	0	0	1	65	3e-30	129
DR_001659-RA	DR_002227-RA	94.3	2545	144	1	1	2545	0	3887
DR_001812-RA	DR_004300-RA	95.99	1472	59	0	1492	2963	0	2450
DR_001812-RA	DR_004300-RA	95	1339	67	0	1	1339	0	2123
DR_001819-RA	DR_004293-RA	92.2	718	56	0	3	720	0	979
DR_001822-RA	DR_004291-RA	93.27	2498	164	2	1001	3497	0	3608
DR_001822-RA	DR_004291-RA	92.33	600	46	0	373	972	0	825
DR_001823-RA	DR_004290-RA	91.1	1236	106	4	1	1234	0	1546
DR_001823-RA	DR_004290-RA	93.99	932	56	0	2409	3340	0	1403
DR_001823-RA	DR_004290-RA	91	1111	88	5	1295	2405	0	1384
DR_001826-RA	DR_004287-RA	93.02	1161	81	0	1	1161	0	1659
DR_001846-RA	DR_012209-RA	93.87	1975	121	0	13	1987	0	2956
DR_001855-RA	DR_011778-RA	93.55	992	64	0	1	992	0	1459
DR_001863-RA	DR_011770-RA	94.24	1355	78	0	1	1355	0	2068
DR_001870-RA	DR_000222-RA	93.79	1949	120	1	1	1949	0	2896
DR_001871-RA	DR_000221-RA	90.4	2073	193	2	16	2088	0	2524
DR_001890-RA	DR_000203-RA	93.19	1880	128	0	1	1880	0	2712
DR_001890-RA	DR_000203-RA	94.07	135	8	0	1890	2024	2e-52	204
DR_001902-RA	DR_000706-RA	94.84	4267	217	3	1	4266	0	6690
DR_001909-RA	DR_000712-RA	95.24	2162	103	0	1	2162	0	3469
DR_001919-RA	DR_000721-RA	91.99	1599	127	1	1	1598	0	2147
DR_001921-RA	DR_000723-RA	89.17	1173	116	3	1	1170	0	1310
DR_001924-RA	DR_000726-RA	94.76	3471	176	2	1	3471	0	5430
DR_001926-RA	DR_000728-RA	94.55	1798	92	2	1	1798	0	2779
DR_001929-RA	DR_000731-RA	96.38	1242	45	0	35	1276	0	2105
DR_001948-RA	DR_004036-RA	88.18	1574	171	4	1	1568	0	1635
DR_001948-RA	DR_004036-RA	91.89	1097	89	0	1706	2802	0	1469
DR_001954-RA	DR_006217-RA	94.62	1748	90	2	13	1758	0	2708
DR_001956-RA	DR_006215-RA	93.53	1299	81	1	105	1403	0	1905
DR_001969-RA	DR_006204-RA	94.22	2371	135	2	1	2370	0	3598
DR_001970-RA	DR_006203-RA	93.65	2030	124	5	1	2028	0	2962
DR_001972-RA	DR_006201-RA	95.07	4483	221	0	1	4483	0	7134
DR_001972-RA	DR_006201-RA	90.03	311	28	1	4438	4745	6e-101	367
DR_001973-RA	DR_006200-RA	93.91	1626	99	0	1	1626	0	2438
DR_001980-RA	DR_006193-RA	93.35	722	48	0	1	722	0	1051
DR_001980-RA	DR_006193-RA	84.54	388	59	1	747	1133	5e-77	285
DR_001990-RA	DR_006185-RA	93.6	719	45	1	1	718	0	1053
DR_001994-RA	DR_007392-RA	92.42	4365	318	2	589	4953	0	6034
DR_001994-RA	DR_007392-RA	94.23	1299	75	0	5588	6886	0	1980
DR_001994-RA	DR_007392-RA	93.66	552	35	0	4966	5517	0	817
DR_001994-RA	DR_007392-RA	94.96	496	25	0	1	496	0	785
DR_001994-RA	DR_007392-RA	94.94	79	4	0	508	586	6e-28	125
DR_001999-RA	DR_007396-RA	94.56	992	54	0	1	992	0	1538
DR_002001-RA	DR_007398-RA	95.11	511	25	0	17	527	0	815
DR_002001-RA	DR_007398-RA	95.16	248	12	0	558	805	1e-110	396
DR_002007-RA	DR_007403-RA	94.12	868	49	1	1	868	0	1310
DR_002008-RA	DR_007404-RA	94.68	1147	61	0	2261	3407	0	1790
DR_002008-RA	DR_007404-RA	96.49	912	32	0	650	1561	0	1554
DR_002008-RA	DR_007404-RA	95.13	637	31	0	1	637	0	1017
DR_002008-RA	DR_007404-RA	95.97	571	23	0	1678	2248	0	950
DR_002008-RA	DR_007404-RA	98.65	74	1	0	3459	3532	2e-32	139
DR_002010-RA	DR_007406-RA	95.73	3813	160	2	1	3810	0	6252
DR_002011-RA	DR_007407-RA	93.02	1447	93	5	5	1449	0	2034
DR_002013-RA	DR_007409-RA	90.16	874	83	1	21	891	0	1047
DR_002015-RA	DR_007411-RA	94.37	2804	158	0	2598	5401	0	4306
DR_002023-RA	DR_007419-RA	93.85	634	38	1	1	634	0	940
DR_002024-RA	DR_007420-RA	93.04	761	53	0	1	761	0	1088
DR_002026-RA	DR_007422-RA	95.02	2047	101	1	1	2047	0	3241
DR_002034-RA	DR_008546-RA	96.39	1273	43	1	145	1414	0	2155
DR_002034-RA	DR_008546-RA	93.73	271	17	0	1469	1739	4e-112	402
DR_002035-RA	DR_008546-RA	92.93	608	39	1	827	1430	0	862
DR_002035-RA	DR_008546-RA	94.35	230	13	0	1823	2052	4e-97	353
DR_002035-RA	DR_008546-RA	90.75	281	23	1	1	281	3e-95	347
DR_002035-RA	DR_008546-RA	94.74	190	10	0	385	574	2e-80	297
DR_002035-RA	DR_008546-RA	95.24	105	5	0	596	700	1e-41	168
DR_002035-RA	DR_008546-RA	94.5	109	6	0	256	364	1e-41	168
DR_002040-RA	DR_008550-RA	94.74	3609	189	1	1	3609	0	5640
DR_002048-RA	DR_008558-RA	95.97	2307	90	1	133	2436	0	3832
DR_002053-RA	DR_008563-RA	95.4	1151	53	0	1	1151	0	1861
DR_002053-RA	DR_008562-RA	95.47	1015	46	0	137	1151	0	1647
DR_002058-RA	DR_008568-RA	93.39	757	47	3	1	757	0	1080
DR_002060-RA	DR_008570-RA	95.04	786	39	0	11	796	0	1249
DR_002061-RA	DR_008571-RA	94.41	1144	63	1	1	1143	0	1752
DR_002069-RA	DR_008579-RA	92.92	777	49	5	69	843	0	1066
DR_002078-RA	DR_008589-RA	91.41	1036	86	3	206	1239	0	1324
DR_002078-RA	DR_008589-RA	85.99	157	21	1	1	156	7e-30	129
DR_002081-RA	DR_008592-RA	95.59	6829	299	1	1	6827	0	11150
DR_002101-RA	DR_001537-RA	92.42	884	59	2	63	938	0	1217
DR_002102-RA	DR_001538-RA	94.74	2263	119	0	1	2263	0	3542
DR_002108-RA	DR_001544-RA	95.18	1203	58	0	13	1215	0	1925
DR_002111-RA	DR_001547-RA	93.94	1320	79	1	1	1319	0	1974
DR_002125-RA	DR_001563-RA	95.58	2400	103	1	13	2412	0	3913
DR_002126-RA	DR_001564-RA	93.73	2154	134	1	1	2154	0	3192
DR_002130-RA	DR_001568-RA	92.6	1527	113	0	1	1527	0	2131
DR_002131-RA	DR_001569-RA	93.12	3068	208	3	19	3085	0	4385
DR_002132-RA	DR_001570-RA	92.95	1390	95	3	179	1566	0	1955
DR_002132-RA	DR_001570-RA	91.78	146	12	0	26	171	2e-49	194
DR_002137-RA	DR_001574-RA	94.12	3096	171	2	1	3095	0	4696
DR_002141-RA	DR_001578-RA	92.88	1137	76	3	1	1135	0	1592
DR_002141-RA	DR_002142-RA	100	60	0	0	1099	1158	6e-27	119
DR_002142-RA	DR_001579-RA	86.72	911	114	2	22	932	0	841
DR_002142-RA	DR_002141-RA	100	60	0	0	873	932	5e-27	119
DR_002145-RA	DR_001581-RA	90.17	824	75	3	1	819	0	973
DR_002161-RA	DR_001596-RA	90.93	1036	94	0	197	1232	0	1308
DR_002173-RA	DR_001606-RA	94.96	5334	269	0	1	5334	0	8441
DR_002178-RA	DR_001611-RA	96.69	967	31	1	1	967	0	1655
DR_002178-RA	DR_001611-RA	100	45	0	0	1150	1194	6e-18	89.7
DR_002186-RA	DR_001620-RA	92.49	1384	96	4	5	1385	0	1895
DR_002192-RA	DR_001625-RA	94.64	3228	170	1	1	3228	0	5023
DR_002200-RA	DR_001633-RA	94.85	757	39	0	1	757	0	1191
DR_002204-RA	DR_001636-RA	95.54	6734	300	0	1	6734	0	10970
DR_002213-RA	DR_001645-RA	95.14	1419	69	0	1250	2668	0	2266
DR_002213-RA	DR_001645-RA	95.07	1216	57	1	1	1216	0	1931
DR_002224-RA	DR_001656-RA	93.78	1463	87	2	1	1462	0	2167
DR_002226-RA	DR_001658-RA	94.81	462	24	0	208	669	0	726
DR_002226-RA	DR_001658-RA	100	65	0	0	1	65	4e-30	129
DR_002227-RA	DR_001659-RA	94.3	2545	144	1	1	2544	0	3887
DR_002238-RA	DR_007036-RA	95.77	1396	59	0	460	1855	0	2300
DR_002238-RA	DR_007036-RA	94.74	266	14	0	1	266	3e-116	416
DR_002238-RA	DR_007036-RA	97.66	128	3	0	380	507	4e-60	230
DR_002245-RA	DR_012479-RA	90.35	839	77	1	1	835	0	1019
DR_002245-RA	DR_012479-RA	92.75	69	5	0	857	925	2e-20	97.6
DR_002248-RA	DR_012476-RA	94.7	1755	92	1	1	1755	0	2734
DR_002249-RA	DR_012475-RA	92.42	844	54	1	12	855	0	1176
DR_002273-RA	DR_001377-RA	94.88	2244	109	2	16	2259	0	3529
DR_002273-RA	DR_001377-RA	88.14	295	29	2	2383	2677	7e-81	299
DR_002282-RA	DR_001386-RA	91.36	1018	88	0	1	1018	0	1320
DR_002286-RA	DR_001390-RA	93.65	1732	95	5	8	1736	0	2541
DR_002299-RA	DR_001403-RA	92.6	3272	224	3	1	3263	0	4573
DR_002308-RA	DR_001413-RA	95.58	2580	114	0	1	2580	0	4211
DR_002310-RA	DR_001415-RA	96.18	1309	50	0	1	1309	0	2198
DR_002315-RA	DR_001421-RA	91.91	940	75	1	12	950	0	1253
DR_002316-RA	DR_001422-RA	92.74	4846	342	4	5	4843	0	6796
DR_002328-RA	DR_001434-RA	94.43	2046	114	0	1	2046	0	3152
DR_002329-RA	DR_001435-RA	90.96	2079	170	7	1	2072	0	2597
DR_002334-RA	DR_001440-RA	94.19	2444	142	0	1	2444	0	3719
DR_002334-RA	DR_001440-RA	93.66	505	32	0	2453	2957	0	747
DR_002338-RA	DR_001444-RA	94.48	489	27	0	1	489	0	755
DR_002344-RA	DR_006181-RA	95.4	935	43	0	1	935	0	1513
DR_002345-RA	DR_006182-RA	93.34	1036	69	0	1	1036	0	1507
DR_002352-RA	DR_012745-RA	93.37	1432	95	0	1	1432	0	2085
DR_002353-RA	DR_012744-RA	92.99	1927	135	0	1	1927	0	2750
DR_002367-RA	DR_012550-RA	94.78	2163	113	0	1	2163	0	3392
DR_002374-RA	DR_012127-RA	92.74	2081	142	6	15	2089	0	2886
DR_002374-RA	DR_002375-RA	100	38	0	0	2052	2089	1e-13	75.8
DR_002375-RA	DR_012126-RA	94.73	854	45	0	1	854	0	1336
DR_002375-RA	DR_002374-RA	100	38	0	0	817	854	6e-14	75.8
DR_002379-RA	DR_012122-RA	93.33	495	33	0	1	495	0	720
DR_002386-RA	DR_012115-RA	94.25	3115	179	0	1562	4676	0	4756
DR_002386-RA	DR_012115-RA	94.39	1534	86	0	1	1534	0	2359
DR_002386-RA	DR_012115-RA	94.12	510	30	0	4953	5462	0	773
DR_002395-RA	DR_010420-RA	95.43	350	16	0	1	350	2e-162	567
DR_002396-RA	DR_010419-RA	92.27	1333	102	1	1	1332	0	1818
DR_002404-RA	DR_010411-RA	94.28	4461	255	0	1	4461	0	6821
DR_002406-RA	DR_010409-RA	95.64	1742	72	2	1	1742	0	2839
DR_002416-RA	DR_010399-RA	89.77	665	64	3	23	684	0	757
DR_002421-RA	DR_010393-RA	93.99	5442	319	6	1	5439	0	8151
DR_002423-RA	DR_010391-RA	92.31	832	64	0	4	835	0	1142
DR_002426-RA	DR_013106-RA	94.95	1564	78	1	1	1564	0	2466
DR_002438-RA	DR_012631-RA	94.4	1607	89	1	1	1607	0	2464
DR_002438-RA	DR_012631-RA	95.92	343	14	0	1616	1958	4e-162	569
DR_002443-RA	DR_012637-RA	95.05	444	21	1	247	690	0	698
DR_002443-RA	DR_012637-RA	96.69	332	11	0	701	1032	5e-163	571
DR_002443-RA	DR_012637-RA	92.23	206	14	1	1	206	4e-74	276
DR_002458-RA	DR_000302-RA	88.93	1265	134	2	739	2003	0	1390
DR_002458-RA	DR_000302-RA	91.6	238	20	0	337	574	3e-85	313
DR_002458-RA	DR_000302-RA	88.13	160	16	1	34	193	8e-40	163
DR_002458-RA	DR_000302-RA	97.53	81	2	0	656	736	2e-34	145
DR_002463-RA	DR_000307-RA	93.45	2685	175	1	1	2684	0	3919
DR_002466-RA	DR_000310-RA	94.84	2285	113	2	1	2283	0	3584
DR_002470-RA	DR_000314-RA	95.36	1725	80	0	1	1725	0	2785
DR_002479-RA	DR_000325-RA	95.35	1527	71	0	690	2216	0	2464
DR_002479-RA	DR_000325-RA	92.61	595	38	2	1	594	0	823
DR_002480-RA	DR_000326-RA	95.69	2344	101	0	1	2344	0	3846
DR_002481-RA	DR_000327-RA	96.51	630	22	0	610	1239	0	1074
DR_002481-RA	DR_000327-RA	89.34	572	60	1	1	572	0	642
DR_002484-RA	DR_000330-RA	93.69	1808	114	0	1	1808	0	2680
DR_002490-RA	DR_000336-RA	94.28	2781	156	1	1	2778	0	4248
DR_002495-RA	DR_000341-RA	94.25	678	36	1	116	790	0	1031
DR_002496-RA	DR_000342-RA	95.55	1146	51	0	1	1146	0	1867
DR_002516-RA	DR_000361-RA	94.67	6472	342	1	1	6472	0	10090
DR_002518-RA	DR_000363-RA	95.13	3369	160	1	1	3369	0	5376
DR_002519-RA	DR_000364-RA	95.25	3518	164	3	18	3533	0	5626
DR_002520-RA	DR_000365-RA	92.37	930	71	0	7	936	0	1281
DR_002526-RA	DR_000371-RA	94.47	1410	71	2	104	1513	0	2171
DR_002546-RA	DR_000391-RA	93.7	2443	149	3	4	2442	0	3602
DR_002547-RA	DR_000392-RA	92.43	1599	115	1	1	1599	0	2212
DR_002549-RA	DR_000394-RA	92.41	3044	226	5	1	3041	0	4163
DR_002550-RA	DR_000395-RA	91.95	2261	173	2	1	2258	0	3037
DR_002554-RA	DR_000398-RA	94.58	1015	54	1	1	1014	0	1568
DR_002563-RA	DR_000408-RA	92.68	560	37	2	353	908	0	773
DR_002563-RA	DR_000408-RA	93.7	349	22	0	1	349	5e-147	517
DR_002564-RA	DR_000409-RA	93.99	1497	90	0	1	1497	0	2254
DR_002668-RA	DR_006756-RA	94	3517	211	0	1	3517	0	5299
DR_002674-RA	DR_006763-RA	91.48	2747	220	7	651	3393	0	3548
DR_002674-RA	DR_006763-RA	94.56	607	31	2	13	619	0	926
DR_002675-RA	DR_006764-RA	92.29	973	72	3	1	971	0	1310
DR_002682-RA	DR_006771-RA	91.46	925	73	4	199	1120	0	1179
DR_002687-RA	DR_006776-RA	94.37	1474	79	3	1	1471	0	2242
DR_002690-RA	DR_006779-RA	95.33	3301	154	0	37	3337	0	5323
DR_002692-RA	DR_006781-RA	94.84	1607	83	0	702	2308	0	2527
DR_002692-RA	DR_006781-RA	91.11	180	16	0	499	678	5e-60	230
DR_002710-RA	DR_006575-RA	94.73	1215	64	0	1	1215	0	1901
DR_002722-RA	DR_006587-RA	94.19	3633	208	1	1668	5300	0	5525
DR_002722-RA	DR_006587-RA	91.74	1452	113	3	168	1614	0	1911
DR_002722-RA	DR_006587-RA	88.55	131	15	0	1	131	8e-33	141
DR_002724-RA	DR_006589-RA	94.58	923	50	0	429	1351	0	1433
DR_002724-RA	DR_006589-RA	92.99	428	30	0	1	428	7e-175	611
DR_002727-RA	DR_006592-RA	93.62	1945	121	1	1	1942	0	2868
DR_002727-RA	DR_006592-RA	94.48	616	33	1	1650	2265	0	944
DR_002729-RA	DR_006594-RA	94.19	3322	188	2	1	3318	0	5045
DR_002729-RA	DR_006594-RA	92.95	227	16	0	3329	3555	6e-88	323
DR_002730-RA	DR_006595-RA	93.14	423	23	3	17	438	2e-169	591
DR_002733-RA	DR_006598-RA	93.64	2422	144	5	1	2421	0	3550
DR_002738-RA	DR_006604-RA	93.82	1781	109	1	1	1781	0	2650
DR_002742-RA	DR_006608-RA	93.63	1915	122	0	1	1915	0	2829
DR_002742-RA	DR_006608-RA	93.68	950	60	0	1957	2906	0	1407
DR_002752-RA	DR_006619-RA	96.48	1561	55	0	599	2159	0	2658
DR_002752-RA	DR_006619-RA	90.31	588	57	0	1	588	0	714
DR_002754-RA	DR_006622-RA	90.99	1310	107	6	1	1302	0	1624
DR_002767-RA	DR_006636-RA	94	3467	195	6	1982	5443	0	5190
DR_002767-RA	DR_006636-RA	94.93	1954	94	3	1	1950	0	3069
DR_002767-RA	DR_006636-RA	93.49	830	49	4	5485	6312	0	1187
DR_002774-RA	DR_004273-RA	93.72	1560	98	0	1	1560	0	2315
DR_002775-RA	DR_004272-RA	92.41	1028	73	2	1	1023	0	1409
DR_002780-RA	DR_004268-RA	95.35	1527	71	0	6	1532	0	2464
DR_002587-RA	DR_010738-RA	94.9	2512	126	2	1	2511	0	3949
DR_002587-RA	DR_010738-RA	93.85	927	55	1	2520	3444	0	1380
DR_002594-RA	DR_013602-RA	93.86	2249	138	0	1	2249	0	3364
DR_002598-RA	DR_005292-RA	94.89	1684	86	0	36	1719	0	2656
DR_002598-RA	DR_005292-RA	94.65	449	24	0	1863	2311	0	700
DR_002601-RA	DR_005289-RA	90.77	1040	87	3	9	1040	0	1289
DR_002622-RA	DR_006996-RA	94.08	1671	98	1	1	1671	0	2520
DR_002624-RA	DR_006998-RA	93.46	1377	84	1	1	1377	0	2018
DR_002629-RA	DR_007003-RA	91.02	568	45	2	10	572	0	714
DR_002629-RA	DR_007003-RA	90.32	124	12	0	628	751	1e-36	151
DR_002631-RA	DR_007004-RA	94.4	7787	431	3	1	7786	0	11960
DR_002635-RA	DR_007008-RA	95.93	1129	46	0	681	1809	0	1873
DR_002635-RA	DR_007008-RA	94.75	438	23	0	1	438	0	686
DR_002654-RA	DR_007027-RA	95.09	1099	54	0	1	1099	0	1750
DR_002786-RA	DR_009242-RA	89.84	620	57	2	1	619	0	722
DR_002786-RA	DR_009242-RA	93.51	185	12	0	641	825	5e-73	272
DR_002788-RA	DR_009244-RA	95.64	986	42	1	43	1027	0	1606
DR_002793-RA	DR_009250-RA	90.55	942	79	6	1	939	0	1122
DR_002794-RA	DR_009251-RA	96.81	1632	52	0	1	1632	0	2823
DR_002837-RA	DR_007632-RA	94.34	1554	88	0	19	1572	0	2383
DR_002837-RA	DR_007632-RA	95.32	278	13	0	1692	1969	9e-126	448
DR_002837-RA	DR_007632-RA	91.67	60	5	0	1985	2044	9e-15	79.8
DR_002838-RA	DR_007630-RA	93.98	2624	158	0	1	2624	0	3949
DR_002840-RA	DR_007628-RA	93.2	647	44	0	1	647	0	934
DR_002841-RA	DR_007627-RA	92.12	3096	238	4	1	3092	0	4175
DR_002844-RA	DR_007623-RA	93.97	1078	60	3	1	1074	0	1602
DR_002859-RA	DR_005915-RA	94.53	2578	141	0	1	2578	0	3992
DR_002872-RA	DR_005903-RA	94.22	1038	60	0	1	1038	0	1582
DR_002873-RA	DR_005902-RA	93.47	1103	70	2	1	1101	0	1600
DR_002875-RA	DR_005900-RA	93.37	2005	133	0	1665	3669	0	2920
DR_002875-RA	DR_005900-RA	93.9	1657	92	3	3	1650	0	2472
DR_002876-RA	DR_005899-RA	93.22	1415	90	2	16	1429	0	2036
DR_002878-RA	DR_005898-RA	95.88	5851	241	0	1	5851	0	9688
DR_002892-RA	DR_003077-RA	93.2	1074	65	2	1	1073	0	1546
DR_002893-RA	DR_003076-RA	94.61	2707	144	2	1	2706	0	4193
DR_002900-RA	DR_003069-RA	93.12	974	67	0	1	974	0	1400
DR_002903-RA	DR_003066-RA	93.04	2671	183	2	1	2669	0	3806
DR_002903-RA	DR_002904-RA	100	405	0	0	2265	2669	0	803
DR_002903-RA	DR_003065-RA	92.35	405	31	0	2265	2669	2e-158	557
DR_002904-RA	DR_003065-RA	92.76	1353	97	1	1	1353	0	1897
DR_002904-RA	DR_002903-RA	100	405	0	0	949	1353	0	803
DR_002904-RA	DR_003066-RA	92.35	405	31	0	949	1353	9e-159	557
DR_002906-RA	DR_003063-RA	95.44	3356	139	3	1	3356	0	5438
DR_002916-RA	DR_003054-RA	95.04	2400	118	1	1	2400	0	3806
DR_002922-RA	DR_003048-RA	95.7	1838	79	0	1	1838	0	3017
DR_002922-RA	DR_003048-RA	96.91	873	27	0	1984	2856	0	1516
DR_002923-RA	DR_003047-RA	94.9	2136	105	2	1	2133	0	3358
DR_002925-RA	DR_003045-RA	95.3	2211	88	4	1	2211	0	3550
DR_002925-RA	DR_003045-RA	94.67	244	13	0	2321	2564	2e-105	381
DR_002928-RA	DR_003042-RA	93.85	3970	242	1	1	3968	0	5929
DR_002928-RA	DR_003042-RA	96.45	141	5	0	4096	4236	1e-62	240
DR_002937-RA	DR_003032-RA	92.55	1033	76	1	221	1253	0	1429
DR_002942-RA	DR_003026-RA	95.2	1918	92	0	1	1918	0	3073
DR_002946-RA	DR_003023-RA	90.82	1351	113	2	16	1364	0	1697
DR_002946-RA	DR_003023-RA	95.65	69	3	0	1398	1466	5e-25	113
DR_002947-RA	DR_003022-RA	93.18	1115	75	1	1	1115	0	1600
DR_002948-RA	DR_003021-RA	93.29	969	65	0	1	969	0	1405
DR_002955-RA	DR_003015-RA	93.38	1541	102	0	426	1966	0	2246
DR_002958-RA	DR_003012-RA	93.04	1020	65	3	1	1017	0	1441
DR_002960-RA	DR_003010-RA	94.31	4110	234	0	1	4110	0	6292
DR_002960-RA	DR_003010-RA	97.16	141	4	0	4341	4481	4e-65	248
DR_002960-RA	DR_003010-RA	91.8	183	9	1	4433	4615	2e-64	246
DR_002964-RA	DR_003006-RA	93.33	2324	147	4	121	2443	0	3354
DR_002964-RA	DR_003006-RA	86.46	96	12	1	8	103	1e-14	79.8
DR_002984-RA	DR_004381-RA	94.21	1364	79	0	1	1364	0	2077
DR_002993-RA	DR_004372-RA	94.81	1752	90	1	1386	3136	0	2744
DR_002993-RA	DR_004372-RA	95.1	388	19	0	848	1235	7e-177	618
DR_002993-RA	DR_004372-RA	95.4	348	16	0	179	526	3e-160	563
DR_002993-RA	DR_004372-RA	94.87	78	4	0	496	573	1e-27	123
DR_003006-RA	DR_002964-RA	93.33	2324	147	4	104	2420	0	3354
DR_003006-RA	DR_002964-RA	86.46	96	12	1	8	102	1e-14	79.8
DR_003010-RA	DR_002960-RA	94.31	4110	234	0	1	4110	0	6292
DR_003010-RA	DR_002960-RA	97.16	141	4	0	4210	4350	4e-65	248
DR_003010-RA	DR_002960-RA	91.8	183	9	1	4588	4764	2e-64	246
DR_003012-RA	DR_002958-RA	93.04	1020	65	3	1	1017	0	1441
DR_003015-RA	DR_002955-RA	93.38	1541	102	0	1	1541	0	2246
DR_003021-RA	DR_002948-RA	93.29	969	65	0	888	1856	0	1405
DR_003022-RA	DR_002947-RA	93.18	1115	75	1	1	1114	0	1600
DR_003023-RA	DR_002946-RA	90.82	1351	113	2	16	1357	0	1697
DR_003023-RA	DR_002946-RA	95.65	69	3	0	1391	1459	5e-25	113
DR_003026-RA	DR_002942-RA	95.2	1918	92	0	1	1918	0	3073
DR_003032-RA	DR_002937-RA	92.55	1033	76	1	1	1032	0	1429
DR_003042-RA	DR_002928-RA	93.85	3970	242	1	1	3970	0	5929
DR_003042-RA	DR_002928-RA	96.45	141	5	0	4231	4371	9e-63	240
DR_003045-RA	DR_002925-RA	95.3	2211	88	4	1	2195	0	3550
DR_003045-RA	DR_002925-RA	94.67	244	13	0	2198	2441	2e-105	381
DR_003047-RA	DR_002923-RA	94.9	2136	105	2	1	2135	0	3358
DR_003048-RA	DR_002922-RA	95.7	1838	79	0	18	1855	0	3017
DR_003048-RA	DR_002922-RA	96.91	873	27	0	1889	2761	0	1516
DR_003054-RA	DR_002916-RA	95.04	2400	118	1	43	2441	0	3806
DR_003063-RA	DR_002906-RA	95.44	3356	139	3	1	3342	0	5438
DR_003065-RA	DR_002904-RA	92.76	1353	97	1	1	1352	0	1897
DR_003065-RA	DR_003066-RA	100	405	0	0	948	1352	0	803
DR_003065-RA	DR_002903-RA	92.35	405	31	0	948	1352	9e-159	557
DR_003066-RA	DR_002903-RA	93.04	2671	183	2	1	2670	0	3806
DR_003066-RA	DR_003065-RA	100	405	0	0	2266	2670	0	803
DR_003066-RA	DR_002904-RA	92.35	405	31	0	2266	2670	2e-158	557
DR_003069-RA	DR_002900-RA	93.12	974	67	0	79	1052	0	1400
DR_003076-RA	DR_002893-RA	94.61	2707	144	2	1	2706	0	4193
DR_003077-RA	DR_002892-RA	93.2	1074	65	2	1	1067	0	1546
DR_003080-RA	DR_008886-RA	93.97	1625	98	0	1	1625	0	2444
DR_003088-RA	DR_008878-RA	91.16	543	47	1	5	546	0	688
DR_003088-RA	DR_008878-RA	95.52	134	6	0	561	694	5e-57	218
DR_003099-RA	DR_004754-RA	93.68	823	51	1	1	822	0	1211
DR_003112-RA	DR_004765-RA	91.7	566	46	1	3	567	0	741
DR_003120-RA	DR_009961-RA	95.96	1337	52	1	1	1337	0	2216
DR_003122-RA	DR_009959-RA	95.05	2304	114	0	1	2304	0	3663
DR_003123-RA	DR_009958-RA	94.44	810	45	0	1	810	0	1249
DR_003124-RA	DR_009957-RA	95.34	1245	55	1	1	1245	0	2004
DR_003128-RA	DR_009953-RA	93.12	3197	220	0	1	3197	0	4593
DR_003131-RA	DR_009950-RA	94.67	900	38	2	1	891	0	1403
DR_003144-RA	DR_009939-RA	94.05	773	46	0	1	773	0	1168
DR_003168-RA	DR_009916-RA	94.51	2148	110	4	1	2145	0	3299
DR_003170-RA	DR_012409-RA	93.19	852	55	2	17	865	0	1215
DR_003174-RA	DR_012413-RA	93.05	1626	110	2	10	1635	0	2313
DR_003175-RA	DR_012619-RA	92.6	2947	216	2	1	2947	0	4098
DR_003176-RA	DR_012620-RA	95.82	765	32	0	1	765	0	1263
DR_003183-RA	DR_012627-RA	94.17	635	37	0	1187	1821	0	965
DR_003183-RA	DR_012627-RA	93.43	563	34	1	613	1172	0	819
DR_003183-RA	DR_012627-RA	92.12	292	23	0	341	632	3e-110	396
DR_003183-RA	DR_012627-RA	90.87	208	16	2	1	206	2e-65	248
DR_003183-RA	DR_012627-RA	89.13	92	10	0	223	314	6e-22	103
DR_003190-RA	DR_013430-RA	93	2085	137	1	1	2076	0	2983
DR_003197-RA	DR_012327-RA	93.16	1432	98	0	200	1631	0	2062
DR_003197-RA	DR_012327-RA	92.09	177	14	0	1	177	3e-63	240
DR_003219-RA	DR_006289-RA	91.23	1425	121	2	1	1425	0	1822
DR_003219-RA	DR_006289-RA	90.14	71	7	0	1442	1512	1e-16	85.7
DR_003220-RA	DR_006291-RA	94.28	821	45	1	6	826	0	1249
DR_003221-RA	DR_006292-RA	94.42	986	55	0	20	1005	0	1518
DR_003244-RA	DR_011951-RA	93.14	977	66	1	1	977	0	1398
DR_003246-RA	DR_011949-RA	95.02	4540	225	1	152	4690	0	7200
DR_003246-RA	DR_011949-RA	96.47	85	3	0	13	97	4e-34	145
DR_003248-RA	DR_011947-RA	93.66	1467	88	2	23	1489	0	2161
DR_003265-RA	DR_010042-RA	94.65	4840	251	2	6	4845	0	7537
DR_003269-RA	DR_010039-RA	90.84	2828	236	9	87	2899	0	3509
DR_003269-RA	DR_010039-RA	91.67	84	7	0	1	84	4e-24	111
DR_003273-RA	DR_010034-RA	95.3	2320	109	0	391	2710	0	3735
DR_003273-RA	DR_010034-RA	89.69	262	23	1	1	262	5e-82	303
DR_003278-RA	DR_010029-RA	94.2	2499	145	0	1	2499	0	3804
DR_003279-RA	DR_010028-RA	92.66	4316	307	7	1	4311	0	5993
DR_003279-RA	DR_010028-RA	91.83	1089	89	0	4342	5430	0	1453
DR_003281-RA	DR_010026-RA	93.84	2843	167	4	5	2840	0	4224
DR_003308-RA	DR_005194-RA	92.91	2300	163	0	1472	3771	0	3267
DR_003308-RA	DR_005194-RA	92.94	850	60	0	1	850	0	1209
DR_003308-RA	DR_005194-RA	94.3	158	9	0	1062	1219	2e-63	242
DR_003308-RA	DR_005194-RA	84.62	130	18	2	921	1050	1e-15	83.8
DR_003318-RA	DR_004267-RA	94.87	702	29	4	1	698	0	1080
DR_003326-RA	DR_009179-RA	95.04	1954	97	0	12	1965	0	3104
DR_003342-RA	DR_006095-RA	92.98	2507	165	7	1	2504	0	3527
DR_003343-RA	DR_006094-RA	93.74	1549	96	1	1	1549	0	2294
DR_003345-RA	DR_006092-RA	95.89	1071	44	0	1	1071	0	1774
DR_003348-RA	DR_006088-RA	95.65	4184	178	4	78	4260	0	6819
DR_003348-RA	DR_006088-RA	100	37	0	0	20	56	1e-12	73.8
DR_003350-RA	DR_006086-RA	93.24	1939	120	3	750	2683	0	2797
DR_003350-RA	DR_006086-RA	92.93	467	33	0	221	687	0	664
DR_003350-RA	DR_006086-RA	93.95	215	13	0	1	215	5e-88	323
DR_003351-RA	DR_006085-RA	94.88	3670	181	4	1	3669	0	5759
DR_003360-RA	DR_006076-RA	93.57	4093	254	2	1	4090	0	6026
DR_003364-RA	DR_006072-RA	95.17	1637	76	2	3	1637	0	2605
DR_003371-RA	DR_006065-RA	93.3	940	60	2	1	940	0	1350
DR_003375-RA	DR_006061-RA	95.58	5163	228	0	1	5163	0	8427
DR_003376-RA	DR_006060-RA	95.42	1244	57	0	1	1244	0	2014
DR_003390-RA	DR_006046-RA	94.27	1030	55	3	1	1027	0	1552
DR_003397-RA	DR_006037-RA	88.75	658	62	4	2	648	0	702
DR_003397-RA	DR_006037-RA	93.68	174	11	0	729	902	8e-69	258
DR_003406-RA	DR_006030-RA	95.05	2728	133	1	1	2728	0	4331
DR_003409-RA	DR_006027-RA	95.29	1911	90	0	1	1911	0	3075
DR_003418-RA	DR_006018-RA	91.71	1893	148	2	1	1890	0	2506
DR_003432-RA	DR_006004-RA	93.18	1012	63	1	414	1419	0	1461
DR_003432-RA	DR_006004-RA	91.22	148	13	0	1	148	2e-48	190
DR_003437-RA	DR_013141-RA	94.65	3923	204	4	1	3922	0	6084
DR_003437-RA	DR_013141-RA	94.47	958	50	2	4056	5012	0	1465
DR_003438-RA	DR_013140-RA	89.77	1212	96	10	138	1332	0	1376
DR_003440-RA	DR_013138-RA	94.48	1231	65	1	1	1231	0	1897
DR_003442-RA	DR_013137-RA	88.95	1267	122	8	883	2134	0	1358
DR_003442-RA	DR_013137-RA	93.83	826	48	3	1	826	0	1209
DR_003449-RA	DR_007432-RA	94.99	1218	61	0	1	1218	0	1931
DR_003450-RA	DR_007433-RA	94.24	5794	326	4	1	5793	0	8814
DR_003455-RA	DR_007438-RA	94.88	2991	153	0	253	3243	0	4716
DR_003455-RA	DR_007438-RA	83.56	225	36	1	4	227	3e-34	145
DR_003467-RA	DR_011845-RA	93.73	1229	66	4	103	1321	0	1808
DR_003479-RA	DR_011833-RA	95.76	7856	328	3	117	7969	0	12910
DR_003482-RA	DR_011830-RA	93.92	1251	73	1	1	1248	0	1873
DR_003483-RA	DR_011829-RA	94.59	2162	113	2	1	2162	0	3346
DR_003483-RA	DR_011829-RA	95.73	914	34	3	2161	3071	0	1483
DR_003505-RA	DR_005551-RA	94.14	3483	192	3	15	3491	0	5281
DR_003517-RA	DR_005538-RA	95.96	1237	50	0	1	1237	0	2056
DR_003517-RA	DR_005538-RA	92.56	1465	104	2	1275	2734	0	2030
DR_003517-RA	DR_005538-RA	91.8	1098	87	1	3042	4139	0	1459
DR_003528-RA	DR_005528-RA	94.3	1122	61	1	172	1290	0	1713
DR_003528-RA	DR_005528-RA	92.86	168	12	0	1	168	1e-62	238
DR_003536-RA	DR_007516-RA	93.86	2215	131	2	61	2275	0	3303
DR_003553-RA	DR_007533-RA	92.83	669	47	1	1	668	0	938
DR_003562-RA	DR_007541-RA	96.16	729	28	0	1	729	0	1223
DR_003575-RA	DR_008425-RA	94.81	1735	89	1	1	1735	0	2718
DR_003577-RA	DR_008423-RA	93.6	1110	65	2	1	1104	0	1629
DR_003578-RA	DR_008422-RA	93.16	2995	193	3	1	2988	0	4306
DR_003586-RA	DR_008414-RA	94.67	1256	65	2	2	1256	0	1943
DR_003602-RA	DR_008399-RA	95	1499	75	0	170	1668	0	2377
DR_003602-RA	DR_008399-RA	93.25	163	11	0	28	190	5e-62	236
DR_003605-RA	DR_008396-RA	93.11	973	67	0	1	973	0	1398
DR_003611-RA	DR_008390-RA	87.94	564	62	2	1	563	3e-163	571
DR_003613-RA	DR_008388-RA	95.3	1427	67	0	4	1430	0	2298
DR_003615-RA	DR_008386-RA	93.57	1399	89	1	1	1398	0	2052
DR_003622-RA	DR_008379-RA	91.44	1156	97	2	1	1155	0	1491
DR_003623-RA	DR_008378-RA	90.49	694	66	0	1	694	0	852
DR_003624-RA	DR_008377-RA	90.04	1094	108	1	77	1170	0	1296
DR_003828-RA	DR_006446-RA	94.61	965	49	2	657	1619	0	1487
DR_003845-RA	DR_007389-RA	91.03	736	62	2	212	943	0	924
DR_003845-RA	DR_007389-RA	92.91	127	9	0	1	127	2e-45	180
DR_003850-RA	DR_007384-RA	91.82	1845	142	5	42	1884	0	2428
DR_003853-RA	DR_007381-RA	95.98	6693	264	3	1	6688	0	11120
DR_003856-RA	DR_007377-RA	88	650	75	3	1437	2085	0	646
DR_003856-RA	DR_007377-RA	97.77	179	4	0	2204	2382	4e-88	323
DR_003863-RA	DR_007371-RA	93.04	2671	167	6	1	2670	0	3798
DR_003865-RA	DR_007368-RA	94.37	5260	289	3	1	5256	0	8064
DR_003877-RA	DR_007357-RA	93.32	913	57	1	7	919	0	1324
DR_003879-RA	DR_007355-RA	93.4	2091	138	0	1	2091	0	3051
DR_003879-RA	DR_007355-RA	97.73	44	1	0	2094	2137	1e-14	79.8
DR_003883-RA	DR_007351-RA	94.23	1924	107	1	9	1932	0	2932
DR_003725-RA	DR_001211-RA	93.78	5307	321	4	1	5303	0	7882
DR_003740-RA	DR_001196-RA	96.32	897	33	0	1	897	0	1516
DR_003745-RA	DR_001191-RA	92.36	1453	109	2	2	1454	0	1984
DR_003758-RA	DR_001178-RA	94.25	1287	71	1	1	1284	0	1961
DR_003767-RA	DR_001170-RA	95.2	4421	212	0	1	4421	0	7083
DR_003771-RA	DR_001165-RA	95.13	718	35	0	649	1366	0	1146
DR_003771-RA	DR_001165-RA	94.24	695	40	0	1937	2631	0	1061
DR_003771-RA	DR_001165-RA	95.26	612	27	1	1	612	0	977
DR_003771-RA	DR_001165-RA	96.43	168	6	0	1609	1776	1e-76	285
DR_003781-RA	DR_001155-RA	95.97	1838	71	1	417	2251	0	3053
DR_003781-RA	DR_001155-RA	93.14	379	18	3	38	410	9e-151	531
DR_003785-RA	DR_001151-RA	94.1	2050	121	0	1	2050	0	3104
DR_003785-RA	DR_001151-RA	93.91	427	26	0	2195	2621	0	640
DR_003793-RA	DR_001143-RA	89.18	1017	99	4	1	1011	0	1126
DR_003793-RA	DR_001143-RA	88	75	9	0	1115	1189	2e-14	77.8
DR_003795-RA	DR_001141-RA	93.29	1311	88	0	829	2139	0	1901
DR_003795-RA	DR_001141-RA	93.11	827	57	0	1	827	0	1187
DR_003796-RA	DR_001140-RA	95.86	1134	46	1	1	1133	0	1867
DR_003797-RA	DR_001139-RA	94.31	1547	86	2	1	1547	0	2353
DR_003797-RA	DR_001139-RA	95.21	501	24	0	1715	2215	0	803
DR_003797-RA	DR_001139-RA	93.75	96	6	0	2350	2445	9e-34	143
DR_003803-RA	DR_004625-RA	95.07	1725	85	0	1342	3066	0	2746
DR_003803-RA	DR_004625-RA	95.64	1077	47	0	127	1203	0	1762
DR_003803-RA	DR_004625-RA	95.13	226	11	0	3074	3299	3e-99	361
DR_003803-RA	DR_004625-RA	100	40	0	0	3398	3437	2e-14	79.8
DR_003632-RA	DR_011194-RA	95.2	1333	64	0	1	1333	0	2135
DR_003653-RA	DR_012523-RA	93.29	1475	99	0	1	1475	0	2139
DR_003658-RA	DR_012527-RA	93.87	1223	74	1	1	1223	0	1822
DR_003663-RA	DR_012532-RA	94.57	1179	61	1	199	1374	0	1826
DR_003672-RA	DR_009155-RA	89.06	2413	264	0	640	3052	0	2690
DR_003672-RA	DR_009155-RA	88.25	383	45	0	253	635	8e-112	402
DR_003672-RA	DR_009155-RA	93.04	158	11	0	3099	3256	1e-58	226
DR_003672-RA	DR_009155-RA	92.57	148	11	0	79	226	9e-53	206
DR_003679-RA	DR_009147-RA	95.55	2137	90	1	772	2908	0	3483
DR_003679-RA	DR_009147-RA	94.71	680	35	1	1	679	0	1055
DR_003679-RA	DR_009147-RA	92.07	164	13	0	2925	3088	2e-57	222
DR_003681-RA	DR_009145-RA	93.62	941	56	2	1	941	0	1378
DR_003681-RA	DR_009145-RA	97.62	42	1	0	961	1002	7e-14	75.8
DR_003682-RA	DR_009144-RA	95.55	3145	140	0	1	3145	0	5124
DR_003690-RA	DR_009139-RA	95.5	933	42	0	1	933	0	1516
DR_003694-RA	DR_009135-RA	94.17	2025	117	1	251	2275	0	3071
DR_003694-RA	DR_009135-RA	96.37	248	9	0	1	248	2e-117	420
DR_003697-RA	DR_010013-RA	94.61	3969	212	2	1	3968	0	6155
DR_003699-RA	DR_010011-RA	94.8	4922	256	0	151	5072	0	7727
DR_003699-RA	DR_010011-RA	98.54	137	2	0	5454	5590	2e-67	256
DR_003699-RA	DR_010011-RA	97.98	99	2	0	5602	5700	9e-45	180
DR_003713-RA	DR_013377-RA	91.59	1332	102	6	1	1327	0	1713
DR_003715-RA	DR_003987-RA	88.96	1893	208	1	176	2067	0	2087
DR_003715-RA	DR_003987-RA	92.66	504	36	1	2101	2603	0	698
DR_003715-RA	DR_003987-RA	93.24	148	10	0	2	149	3e-55	214
DR_003718-RA	DR_003990-RA	95.89	997	35	2	1	991	0	1643
DR_003718-RA	DR_003990-RA	96.55	58	2	0	1080	1137	5e-21	99.6
DR_003997-RA	DR_008356-RA	95.4	1848	85	0	649	2496	0	2989
DR_003997-RA	DR_008356-RA	95.86	531	22	0	1	531	0	878
DR_004001-RA	DR_008352-RA	91.45	725	56	3	1	723	0	928
DR_004015-RA	DR_008338-RA	92.83	1702	120	2	1	1702	0	2391
DR_004026-RA	DR_008327-RA	92.91	3244	230	0	57	3300	0	4607
DR_004027-RA	DR_008326-RA	92.4	1355	95	3	1	1348	0	1855
DR_004036-RA	DR_001948-RA	88.18	1574	171	4	3092	4656	0	1635
DR_004036-RA	DR_001948-RA	91.89	1097	89	0	4661	5757	0	1469
DR_004037-RA	DR_013668-RA	87.54	634	79	0	1114	1747	0	630
DR_004037-RA	DR_013668-RA	84.42	693	108	0	228	920	1e-146	517
DR_004037-RA	DR_013668-RA	95.14	144	7	0	968	1111	3e-60	230
DR_004039-RA	DR_013670-RA	89	982	100	4	1	980	0	1066
DR_004042-RA	DR_013674-RA	93.9	1590	96	1	1	1589	0	2375
DR_004050-RA	DR_007765-RA	92.73	1431	104	0	1	1431	0	2012
DR_004063-RA	DR_007751-RA	94.14	3363	197	0	1	3363	0	5105
DR_004063-RA	DR_007751-RA	92	75	6	0	3471	3545	4e-21	101
DR_004064-RA	DR_007750-RA	93.57	1571	101	0	1	1571	0	2313
DR_004067-RA	DR_007747-RA	90.15	518	48	2	1	517	1e-174	609
DR_004077-RA	DR_007738-RA	92.58	458	33	1	1	457	0	630
DR_004077-RA	DR_007738-RA	81.92	260	46	1	558	816	7e-32	135
DR_004078-RA	DR_007737-RA	94.72	2786	141	3	49	2829	0	4339
DR_004081-RA	DR_012856-RA	93.41	744	49	0	242	985	0	1086
DR_004081-RA	DR_012856-RA	92.12	203	16	0	11	213	4e-74	276
DR_004082-RA	DR_012857-RA	91.87	1734	132	2	58	1782	0	2317
DR_004083-RA	DR_012858-RA	94.85	1689	78	1	1	1689	0	2666
DR_003903-RA	DR_009895-RA	91.29	746	60	3	1	743	0	944
DR_003907-RA	DR_009891-RA	94.13	4138	240	3	1	4138	0	6252
DR_003911-RA	DR_009887-RA	91.02	735	66	0	1	735	0	934
DR_003911-RA	DR_009887-RA	88.38	327	38	0	746	1072	1e-95	347
DR_003915-RA	DR_009883-RA	93.19	1248	85	0	1	1248	0	1800
DR_003919-RA	DR_009879-RA	95.43	1971	90	0	1	1971	0	3194
DR_003920-RA	DR_009878-RA	93.82	874	52	1	203	1076	0	1298
DR_003920-RA	DR_009878-RA	92.81	139	10	0	14	152	3e-50	196
DR_003926-RA	DR_009871-RA	94.13	1448	83	2	3	1449	0	2181
DR_003934-RA	DR_012675-RA	91.98	1571	122	4	1	1568	0	2083
DR_003953-RA	DR_012999-RA	93.86	1465	86	3	1	1464	0	2169
DR_003958-RA	DR_013004-RA	93.87	2706	160	5	8	2711	0	4010
DR_003958-RA	DR_013004-RA	85.82	134	17	2	2777	2908	1e-20	99.6
DR_003967-RA	DR_013014-RA	94.48	1086	54	1	1	1080	0	1679
DR_003972-RA	DR_013019-RA	87.4	1659	166	14	189	1820	0	1578
DR_003972-RA	DR_013019-RA	93.75	48	3	0	100	147	2e-12	71.9
DR_003974-RA	DR_013021-RA	94.39	1106	62	0	1	1106	0	1701
DR_003974-RA	DR_013020-RA	95.11	962	47	0	145	1106	0	1534
DR_003975-RA	DR_013022-RA	93.16	1184	76	2	166	1345	0	1695
DR_003979-RA	DR_013026-RA	93.9	672	41	0	422	1093	0	1007
DR_003979-RA	DR_013026-RA	90.27	401	39	0	1	401	3e-137	486
DR_003979-RA	DR_013026-RA	89.54	411	43	0	1102	1512	1e-133	474
DR_003981-RA	DR_013029-RA	95.11	1595	77	1	178	1771	0	2535
DR_003981-RA	DR_013029-RA	90.48	147	13	1	1	146	7e-43	172
DR_003987-RA	DR_003715-RA	88.96	1893	208	1	1223	3115	0	2087
DR_003987-RA	DR_003715-RA	92.66	504	36	1	3153	3656	0	698
DR_003987-RA	DR_003715-RA	93.24	148	10	0	1034	1181	4e-55	214
DR_003990-RA	DR_003718-RA	95.89	997	35	2	1	997	0	1643
DR_003990-RA	DR_003718-RA	96.55	58	2	0	1222	1279	6e-21	99.6
DR_003995-RA	DR_012991-RA	92.26	2831	214	3	1	2828	0	3856
DR_004107-RA	DR_009504-RA	93.29	1535	95	4	982	2513	0	2202
DR_004107-RA	DR_009504-RA	94.43	844	45	2	19	861	0	1285
DR_004110-RA	DR_009501-RA	94.87	5089	249	6	1	5084	0	7983
DR_004110-RA	DR_009501-RA	92.79	402	20	1	5456	5857	2e-163	575
DR_004110-RA	DR_009501-RA	96.88	160	5	0	5277	5436	6e-74	278
DR_004126-RA	DR_010213-RA	96.04	757	30	0	1	757	0	1263
DR_004139-RA	DR_011400-RA	94.77	994	50	2	26	1017	0	1542
DR_004153-RA	DR_011414-RA	94.71	1910	97	2	2623	4529	0	2974
DR_004153-RA	DR_011415-RA	95.84	1563	62	1	532	2091	0	2579
DR_004167-RA	DR_011429-RA	92.52	2260	160	2	2	2255	0	3138
DR_004172-RA	DR_012201-RA	94.22	1783	101	2	20	1800	0	2702
DR_004172-RA	DR_012201-RA	91.03	1550	127	6	1809	3353	0	1935
DR_004173-RA	DR_012200-RA	94.29	1436	74	6	1	1435	0	2153
DR_004177-RA	DR_012196-RA	95.69	1068	46	0	1	1068	0	1752
DR_004183-RA	DR_012191-RA	92.85	923	66	0	184	1106	0	1306
DR_004193-RA	DR_012177-RA	90.24	2655	244	6	210	2851	0	3180
DR_004202-RA	DR_009262-RA	93.16	1520	101	2	5	1522	0	2175
DR_004202-RA	DR_009262-RA	95.85	1132	47	0	1848	2979	0	1871
DR_004202-RA	DR_009262-RA	96.4	278	10	0	2724	3001	1e-132	472
DR_004211-RA	DR_011469-RA	94.2	2017	111	2	23	2036	0	3063
[truncated: 2,166 more rows]

## Sheet: Protein_allBLAST
Query	Target	Ident	length	miss	Gaps	Start	Stop	e-Value	Bit_score
[truncated: 3,427 more rows]

[truncated: 1 more sheets: Expression_of_paralogs]
